# Supplementary material for: Transition metal-free, base mediated one-pot approach for the construction of the benzo[b][1,4,5]oxathiazepine 1-oxide core
Source: Royal Society of Chemistry journal article supplement (doi:10.1039/d2ob01158a), 2022-01-01
Supplement: d2ob01158a1.pdf [file d2ob01158a1.pdf]

# Supporting Information

## Transition metal-free, base-mediated one-pot approach for the construction of benzo[*b*] [1,4,5]oxathiazepine 1-oxide core

Arpita Banerjee,<sup>a</sup> and Gautam Panda,<sup>a\*</sup>

<sup>a</sup> Medicinal and Process Chemistry Division, CSIR-Central Drug Research Institute, Sector-10,

Jankipuram Extension, Lucknow-226031, India. EMAIL: [gautam.panda@gmail.com](mailto:gautam.panda@gmail.com);

[gautam\\_panda@cdri.res.in](mailto:gautam_panda@cdri.res.in)

### Index of Contents

| Serial No. | Contents                                   | Page No. |
|------------|--------------------------------------------|----------|
| 1.         | Preparation of Sulfoximines                | SI-1     |
| 2.         | Preparation of Epoxides                    | SI-4     |
| 3.         | Other Optimizations                        | SI-6     |
| 4.         | Characterization of Sulfoximines           | SI-6     |
| 5.         | 2D NMR analysis of 4q, 4r, 4z, 4z' and 4zb | SI-12    |
| 6.         | X-ray Crystallographic Information         | SI-24    |

1.

G

General procedure for the preparation of sulfoximines (GP1): (1a-1g)

**Step 1A (a-e)** 2-bromo thiophenol (1 mmol, 1 equiv.) was added dropwise into a freshly prepared aqueous solution of NaOH (1.88 mmol, 1.88 equiv.) in 2.5 ml H<sub>2</sub>O with continuously stirring at 40 °C. After that, alkyl iodide (methyl, ethyl, propyl, butyl & isopropyl iodide, 2.0 mmol, 2 equiv.) was further added slowly into the reaction mixture. Thereafter white suspension was generated & the reaction mixture was stirred at 40 °C for 12 h. In the completion of the reaction, the reaction mixture was extracted with EtOAc (3 X 50 ml), washed with brine, dried with Na<sub>2</sub>SO<sub>4</sub> & organic layer was concentrated by rotary evaporator. Yellow oil was yielded with 90 % of conversion. The compound was placed for next reaction without purification.

1

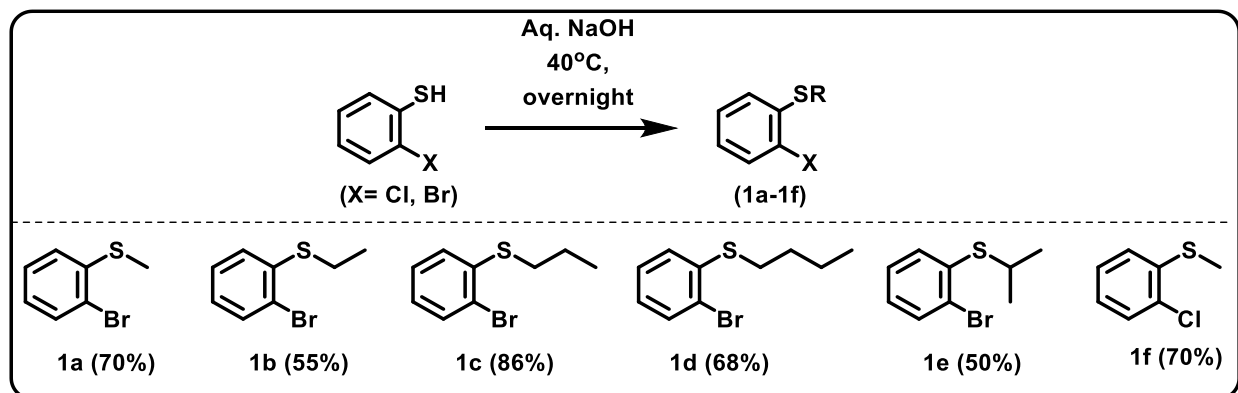

**Step 1B (1f, 1g)** To a stirred solution of substituted 2-Bromo thiophenol (1.0 mmol, 1.0 equiv.) and K<sub>2</sub>CO<sub>3</sub> (1.5 mmol, 1.5 equiv) in dry DMF (2.5 mL) under nitrogenous atmosphere, alkyl bromide (cyclopropyl, cyclopentyl iodide, 1.3 mmol, 1.3 equiv.) was added dropwise. The reaction mixture was stirred at 120 °C for overnight. After the complete conversion (monitored by TLC), reaction mixture was cooled to room temperature & quenched with water. The crude reaction mixture was transferred into a separatory funnel, extracted with chilled Et<sub>2</sub>O (3 × 50 mL) & water (1 × 50 mL). The organic layer was washed with brine, dried in Na<sub>2</sub>SO<sub>4</sub> & solvent

was evaporated by rotary evaporator which yielded yellow oil with good yield. The compound was further placed for next reaction without purification.<sup>2</sup>

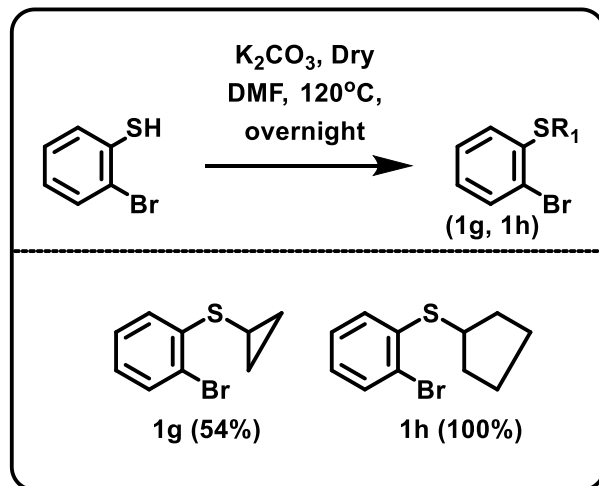

**Step 2 (2a-2i)** The sulfide (obtained from **Step 1A**, **Step 1B**) (1 mmol, 1 equiv.), (diacetoxyiodo)benzene (2.5 mmol, 2.5 equiv) and ammonium acetate (2.5 mmol, 2 equiv.) were taken in a 100 ml round bottom flask. MeOH (2.5 mL) was added under  $N_2$  condition and the reaction mixture was stirred at  $25^\circ C$  for 3-3.30 h.<sup>3</sup> At the end of the reaction (monitored by TLC), the solvent was removed under reduced pressure by rotary evaporator. *Ortho*-bromo NH-sulfoximine(**2a-2i**) were purified by basified column chromatography (100-200 mesh size).

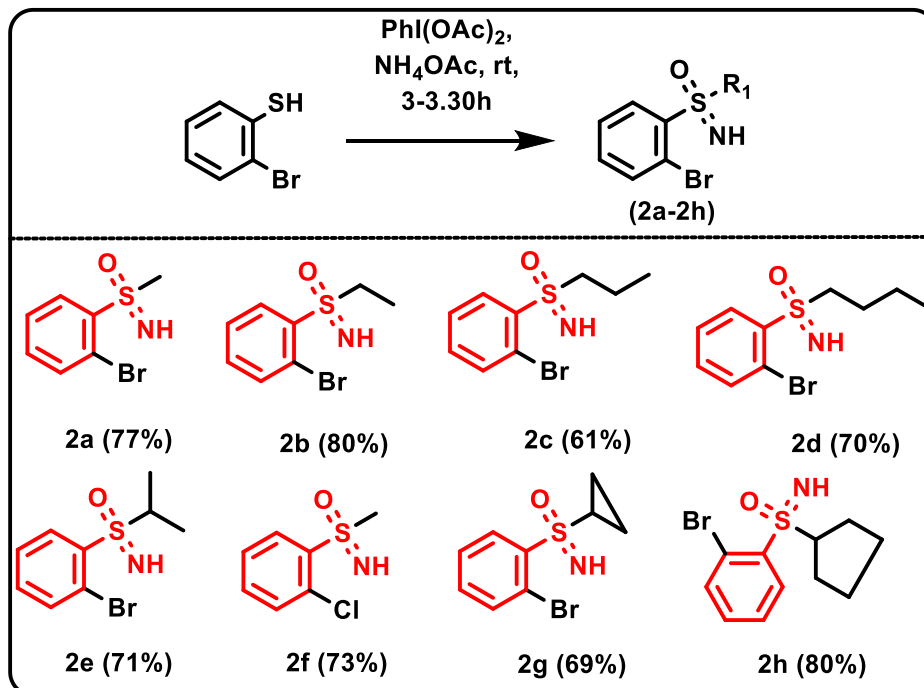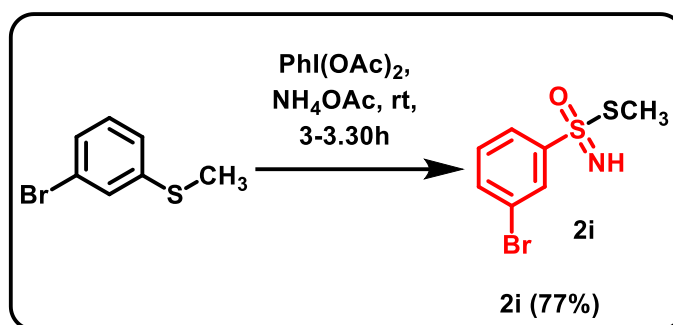

## 2. General procedures for the preparation of epoxides (GP2): (3a-3n)

**Note-** Compound 3a- 3f are commercially available.

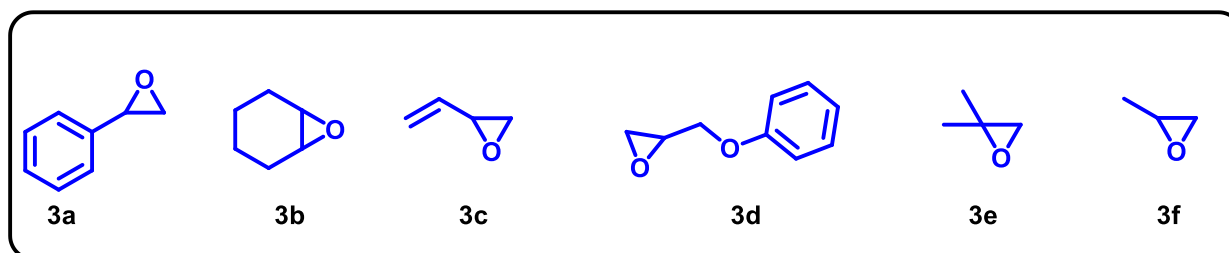

**Step 1** Alkene (1.00 mmol) was taken in a 50 ml round-bottom flask, afterwards 2,2,2- trifluoro-1-phenylethanone (0.01 ml). *tert*-Butyl alcohol (1.875 mL), aqueous buffer solution (1.0 mL, 0.6 M K<sub>2</sub>CO<sub>3</sub>, 4 × 10<sup>-5</sup> M EDTA tetrasodium salt), acetonitrile (0.13 ml), and 30% aqueous H<sub>2</sub>O<sub>2</sub> (0.28 mL) were added consecutively. The reaction mixture was stirred for 1 h at room temperature. Thereafter the reaction mixture was extracted with EtOAc (3 x 25 ml) & concentrated under vacuo. The compounds (**3g-3l**) were further placed for next reaction without purification.<sup>4</sup>

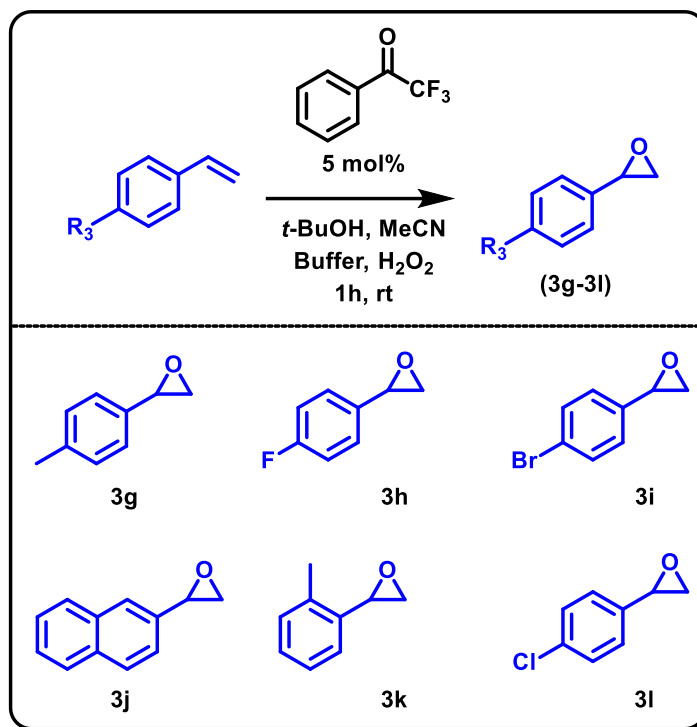

**Step 2** (**3m**, **3n**) OH group of *S*-/*R*- glycidol (**3m**, **3n**) was protected to OBn by the treatment with benzyl bromide (1.5 equiv), NaH (3.0 equiv) as modified version of Finch approach.<sup>5</sup>

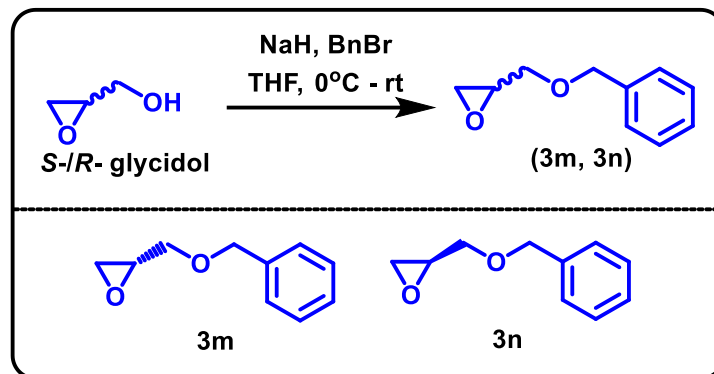

## 2. Other Optimizations

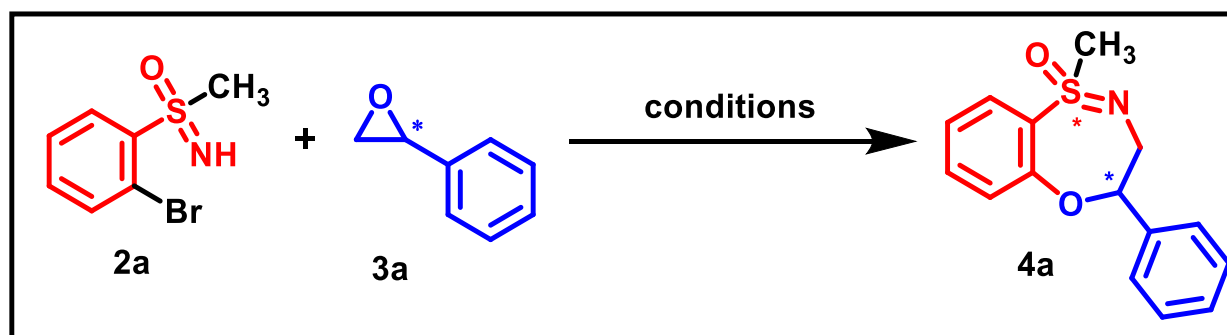

| Entry | Base (equiv.)                         | Temperature(°C) | Solvent  | Yield (%) |
|-------|---------------------------------------|-----------------|----------|-----------|
| 1.    | NaOH(2.5)                             | rt              | DMSO     | NR        |
| 2.    | K <sub>2</sub> CO <sub>3</sub> (2.5)  | rt              | DMF      | NR        |
| 3.    | Cs <sub>2</sub> CO <sub>3</sub> (2.5) | rt              | DMF/DMSO | NR        |
| 4.    | Et <sub>3</sub> N(2.5)                | rt              | DMF      | NR        |

|    |            |    |      |    |
|----|------------|----|------|----|
| 5. | DIPEA(2.5) | rt | DMF  | NR |
| 6. | DBU(2.5)   | rt | DMSO | NR |
| 7. | DABCO(2.5) | rt | DMSO | NR |

#### 4. Characterization of Sulfoximines

##### (2-Bromophenyl)(imino)(methyl)- $\lambda^6$ -sulfanone (2a)

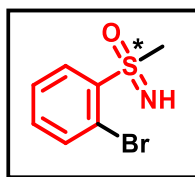

Compound **2a** was prepared by **GP1**.<sup>1,6</sup>

**Physical state:** Orange colored solid

**Yield:** 77% (2.7 g)

**Melting Point:** 65 °C

**R<sub>f</sub>:** 0.38 (Hexane: Ethyl Acetate = 70:30)

**<sup>1</sup>H NMR (400 MHz, CDCl<sub>3</sub>):**  $\delta_{\text{H}}$  8.24 (1H, dd,  $J = 7.8, 1.7$  Hz), 7.77 (1H, dd,  $J = 7.8, 1.2$  Hz), 7.53-7.49 (1H, m), 7.45-7.41 (1H, m), 3.33 (3H, s), 2.02 (1H, brs).

**<sup>13</sup>C NMR (125 MHz, CDCl<sub>3</sub>):** 142.6, 135.6, 134.0, 130.9, 128.1, 120.7, 43.1.

**MS (ESI):** ( $[M]^+$ ) 234.3, 236.3.

**HPLC analysis:** column= CHIRALPAKIA, 2-propanol/n-hexane=5/95, flow rate =1.0 mL/min,  $\lambda = 230$  nm, retention time: 46.018 min, 54.957 min.

##### (2-Bromophenyl)(ethyl)(imino)- $\lambda^6$ -sulfanone (2b)

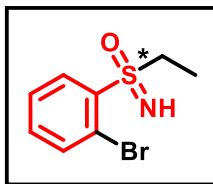

Compound **2b** was prepared by **GP1**.<sup>1,7</sup>

**Physical state:** Light yellow oil

**Yield:** 80% (800 mg)

**R<sub>f</sub>** : 0.6 (Hexane: Ethyl Acetate = 70:30)

**<sup>1</sup>H NMR (400 MHz, CDCl<sub>3</sub>):**  $\delta_{\text{H}}$  8.20 ( 1H, dd,  $J = 7.9, 1.8$  Hz), 7.76 ( 1H, dd,  $J = 7.8, 1.2$  Hz), 7.53-7.49 (1H, m), 7.45-7.41 (1H, m), 3.62-3.53 (1H, m), 3.50-3.41 (1H, m), 2.54 (1H, brs), 1.27 (3H, t,  $J = 7.5$  Hz ).

**<sup>13</sup>C NMR (125 MHz, CDCl<sub>3</sub>):** 140.6, 135.7, 133.9, 132.2, 127.9, 120.9, 48.7, 7.4.

**MS (ESI):** ( $[\text{M}]^+$ ) 248.3.

**(2-Bromophenyl)(imino)propyl-  $\lambda^6$ -sulfanone (2c)**

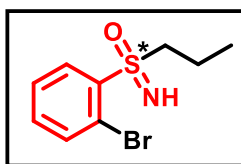

Compound **2c** was prepared by **GP1**.

**Physical state:** Light yellow oil

**Yield:** 61% (1.2g)

**R<sub>f</sub>**: 0.4 (Hexane: Ethyl Acetate =50:50)



**<sup>1</sup>H NMR (400 MHz, CDCl<sub>3</sub>):**  $\delta_{\text{H}}$  8.20 ( 1H, dd,  $J = 7.9, 1.8$  Hz), 7.75 ( 1H, dd,  $J = 7.8, 1.3$  Hz), 7.52-7.48 (1H, m), 7.43-7.40 (1H, m), 3.55-3.48 (1H, m), 3.45-3.38 (1H, m), 1.86-1.63 (2H, m), 1.01 (3H, t,  $J = 7.5$  Hz).

**<sup>13</sup>C NMR (125 MHz, CDCl<sub>3</sub>):** 141.4, 135.6, 133.9, 131.9, 127.9, 120.9, 55.9, 16.6, 12.9.

**HRMS(ESI) (m/z) [C<sub>9</sub>H<sub>12</sub>BrNOS+H]<sup>+</sup>:** Calcd. 261.9896, found 261.9892.

**(2-Bromophenyl)(butyl)(imino)-  $\lambda^6$ -sulfanone (2d)**

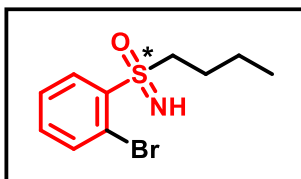

Compound **2d** was prepared by **GP1**.

**Physical state:** Light yellow oil

**Yield:** 70% (394 mg)

**R<sub>f</sub>:** 0.5 (Hexane: Ethyl Acetate =50:50)

**<sup>1</sup>H NMR (400 MHz, CDCl<sub>3</sub>):**  $\delta_{\text{H}}$  8.21 ( 1H, dd,  $J = 7.9, 1.8$  Hz), 7.76 ( 1H, dd,  $J = 7.8, 1.3$  Hz), 7.52-7.48 (1H, m), 7.44-7.40 (1H, m), 3.57-3.50 (1H, m), 3.47-3.39 (1H, m), 2.44( 1H, brs), 1.796-1.59 (2H, m), 1.46-1.37 ( 2H, m), 0.91 (3H, t,  $J = 7.4$  Hz).

**<sup>13</sup>C NMR (125 MHz, CDCl<sub>3</sub>):** 141.3, 135.6, 133.9, 131.9, 127.9, 120.8, 53.9, 24.7, 21.5, 13.5.

**HRMS(ESI) (m/z) [C<sub>10</sub>H<sub>14</sub>BrNOS+H]<sup>+</sup>:** Calcd. 276.0052, found 276.0053.

**(2-Bromophenyl)(imino)(isopropyl)-  $\lambda^6$ -sulfanone (2e)**

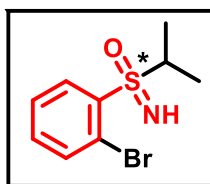

Compound **2e** was prepared by **GP1**.

**Physical state:** White solid

**Yield:** 71% (770 mg)

**Melting Point:** 98°C

**R<sub>f</sub>:** 0.5 (Hexane: Ethyl Acetate =50:50)

**<sup>1</sup>H NMR (400 MHz, CDCl<sub>3</sub>)** δ<sub>H</sub> 8.20 ( 1H, dd, *J*= 7.8, 1.8 Hz ), 7.75( 1H, dd, *J*= 7.8, 1.3 Hz), 7.51-7.47 (1H, m), 7.43-7.39 (1H, m), 4.00-3.91 (1H, m), 3.27( 1H, brs), 1.40 ( 3H, d, *J* = 6.7 Hz), 1.26 ( 3H, d, *J* = 6.7 Hz).

**<sup>13</sup>C NMR (125 MHz, CDCl<sub>3</sub>):** 140.1, 135.7, 133.8, 132.6, 127.8, 120.9.

**HRMS(ESI) (m/z) [C<sub>9</sub>H<sub>12</sub>BrNOS+H]<sup>+</sup>:** Calcd. 261.9896, found 261.9891.

**(2-chlorophenyl)(imino)(methyl)-λ<sup>6</sup>-sulfanone(2f)**

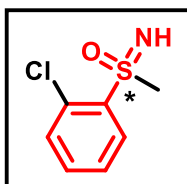

Compound **2h** was prepared by **GP1**.

**Physical state:** semisolid

**Yield:** 73% (439 mg)

**R<sub>f</sub>:** 0.38 (Hexane: Ethyl Acetate = 70:30)

**<sup>1</sup>H NMR (400 MHz, CDCl<sub>3</sub>):** δ<sub>H</sub> 8.19-8.16 ( 1H, m), 7.55-7.50 ( 2H, m), 7.46-7.43 (1H, m), 3.31 (3H, s).

**<sup>13</sup>C NMR (125 MHz, CDCl<sub>3</sub>):** 140.9, 134.1, 132.4, 132.1, 130.7, 127.5, 43.4.

**HRMS(ESI) (m/z) [C<sub>7</sub>H<sub>8</sub>ClNOS+H]<sup>+</sup>:** Calcd. 190.0088, found 190.0087.

**(2-Bromophenyl)(cyclopropyl)(imino)- λ<sup>6</sup>-sulfanone(2g)**

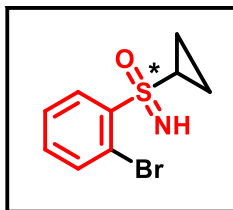

Compound **2f** was prepared by **GP1**.

**Physical state:** Brownish semi solid;

**Yield:** 69% (382 mg)

**R<sub>f</sub>:** 0.5 (Hexane: Ethyl Acetate =50:50)

**<sup>1</sup>H NMR (400 MHz, CDCl<sub>3</sub>):** δ<sub>H</sub> 8.08 ( 1H, dd, *J*= 7.8, 1.8 Hz), 7.73 ( 1H, dd, *J*= 7.8, 1.3 Hz), 7.46-7.42 (1H, m), 7.39-7.35 (1H, m), 3.21-3.15 (1H, m), 2.87 ( 1H, brs), 1.51-1.43 (1H, m), 1.14-1.09 ( 1H, m), 1.08-1.04 (1H,m), 0.97-0.89 (1H, m).

**<sup>13</sup>C NMR (125 MHz, CDCl<sub>3</sub>):** 142.4, 135.6, 133.5, 130.6, 127.8, 120.4, 31.3, 6.1, 5.7.

**HRMS(ESI) (m/z) [C<sub>9</sub>H<sub>10</sub>BrNOS+H]<sup>+</sup>: Calcd. 259.9739, found 259.9738.**

**(2-Bromophenyl)(cyclopentyl)(imino)- λ<sup>6</sup>-sulfanone (2h)**

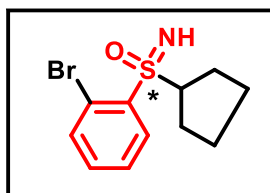

Compound **2g** was prepared by **GP1**.

**Physical state:** Light yellow oil.

**Yield:** 80% (1.32 g)

**R<sub>f</sub>:** 0.3 (Hexane: Ethyl Acetate = 50:50)

**<sup>1</sup>H NMR (400 MHz, CDCl<sub>3</sub>):** δ<sub>H</sub> 8.21 ( 1H, dd, *J*= 7.8, 1.7 Hz ), 7.74 ( 1H, dd, *J*= 7.8, 1.2 Hz), 7.49-7.45 (1H, m), 7.41-7.37 (1H, m), 4.32-4.24 (1H, m), 3.75( 1H, brs), 2.33-2.24 (1H, m), 2.33-2.24 (1H, m), 2.03-2.00 ( 1H, m), 1.88-1.56 (3H,m).

$^{13}\text{C}$  NMR (125 MHz,  $\text{CDCl}_3$ ): 141.3, 135.7, 133.7, 132.2, 127.8, 120.8, 61.7, 27.5, 26.8, 26.1, 26.0.

HRMS(ESI) (m/z) [ $\text{C}_{11}\text{H}_{14}\text{BrNOS}+\text{H}$ ] $^+$ : Calcd. 288.0052, found 288.0053.

### S-methyl 3-bromobenzenesulfonimidothioate (2i)

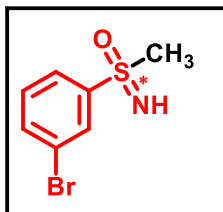

Compound **2h** was prepared by **GP1**.<sup>1,6</sup>

**Physical state:** semisolid

**Yield:** 77% (111 mg)

**R<sub>f</sub>:** 0.38 (Hexane: Ethyl Acetate = 70:30)

$^1\text{H}$  NMR (500 MHz,  $\text{CDCl}_3$ ):  $\delta_{\text{H}}$  8.15-8.14 (1H, m), 7.93-7.92 (1H, m), 7.73-7.72(1H, m), 7.44-7.40 (1H, m), 3.09 (3H, s).

$^{13}\text{C}$  NMR (125 MHz,  $\text{CDCl}_3$ ): 145.6, 136.1, 130.8, 130.7, 126.3, 123.3, 46.1.

**MS (ESI):** ( $[\text{M}+3]^+$ ) 236.1.

### 2-(4-chlorophenyl)-2 $\lambda^3$ -oxirane (3l)

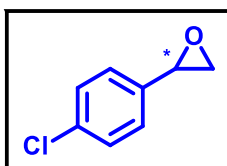

**HPLC analysis:** column= CHIRALPAKIG, 2-propanol/n-hexane=5/95, flow rate =1.0 mL/min,  $\lambda$ =230 nm, retention time: 4.786 min, 5.010 min.

## 5. 2D NMR analysis

### 5.1 Stereochemistry analysis of the exact structure of **4q**

## NMR Study

NMR spectra were recorded on Bruker Advance DPX 200FT, Bruker Robotics, Bruker DRX 400 Spectrometers at 400 MHz ( $^1\text{H}$ ) and 125 MHz ( $^{13}\text{C}$ ) in suitable solvents ( $\text{CDCl}_3$ ). Resonance assignments were carried out using various one dimensional, two-dimensional experiments. **4q** isomer was separable & that was proved by integration of  $^1\text{H}$  NMR spectra (18H protons) along with molecular formula  $\text{C}_{17}\text{H}_{18}\text{ClNO}_2\text{S}$  of both the compounds. The formation of seven-membered ring was confirmed by two dimensional NOESY, COSY, HSQC and HMBC experiments. The formation of seven membered rings was confirmed with the characteristics long range correlation obtained from HMBC. From NOESY (**R,S**)-**4q**,  $\text{C}_{11}\text{H}$  (7.80 ppm) shows weak interaction with  $\text{C}_8\text{H}$  (3.72-3.64 ppm),  $\text{C}_5\text{H}$  (*Pro-S*) (3.62 ppm) weak interaction with  $\text{C}_{15}$ ,  $\text{C}_{16}\text{H}$  (7.44-7.42 ppm),  $\text{C}_4\text{H}$  (5.07 ppm) strong interaction with  $\text{C}_{15}$ ,  $\text{C}_{16}\text{H}$  (7.44-7.42 ppm),  $\text{C}_4\text{H}$  (5.07 ppm) strong interaction with  $\text{C}_5\text{H}$  (*Pro-S*) (3.82 ppm) and  $\text{C}_4\text{H}$  (5.07 ppm) weak interaction with  $\text{C}_5\text{H}$  (*Pro-S*) (3.62 ppm). In HMBC correlation for compound (**R,S**)-**4q** [ $\text{C}_4$  (87 ppm) shows moderate interaction with  $\text{C}_{15,16}\text{H}$  (7.44-7.42 ppm)]. Isopropyl group has no interaction with *pro-R*, *Pro-S* H's. As a result, isopropyl group is in the below site.

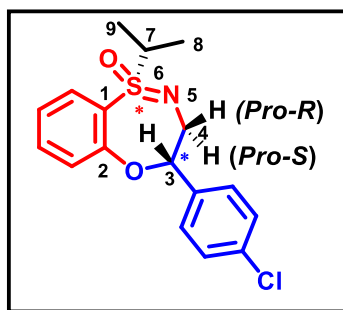

| Proton               | $^1\text{H}$ Chemical shift and coupling constant | $^{13}\text{C}$ Chemical shift |
|----------------------|---------------------------------------------------|--------------------------------|
| $\text{C}_2\text{H}$ | -                                                 | 156.6                          |

|                                         |                                                   |                   |
|-----------------------------------------|---------------------------------------------------|-------------------|
| <b>C<sub>4</sub>H</b>                   | <b>5.07 (dd, <i>J</i> = 5.9,<br/>3.08 Hz)</b>     | <b>87.1</b>       |
| <b>C<sub>5</sub>H<sub>(Pro-R)</sub></b> | <b>3.82 (dd, <i>J</i> = 14.6,<br/>3.8 Hz)</b>     | <b>51.3</b>       |
| <b>C<sub>5</sub>H<sub>(Pro-S)</sub></b> | <b>3.62 (dd, <i>J</i> = 14.6,<br/>6.0 Hz)</b>     | <b>51.3</b>       |
| <b>C<sub>8</sub>H</b>                   | <b>3.72-3.6<br/>4(m)</b>                          | <b>54.5</b>       |
| <b>C<sub>9,10</sub>H</b>                | <b>1.36, 1.30 (d, <i>J</i> = 6.9,<br/>6.8 Hz)</b> | <b>16.2, 15.1</b> |
| <b>C<sub>11</sub>H</b>                  | <b>7.8 (dd, <i>J</i> = 7.8, 1.6<br/>Hz)</b>       | <b>131.0</b>      |
| <b>C<sub>15, 16</sub>H</b>              | <b>7.44-7.42 (m)</b>                              | <b>127.7</b>      |

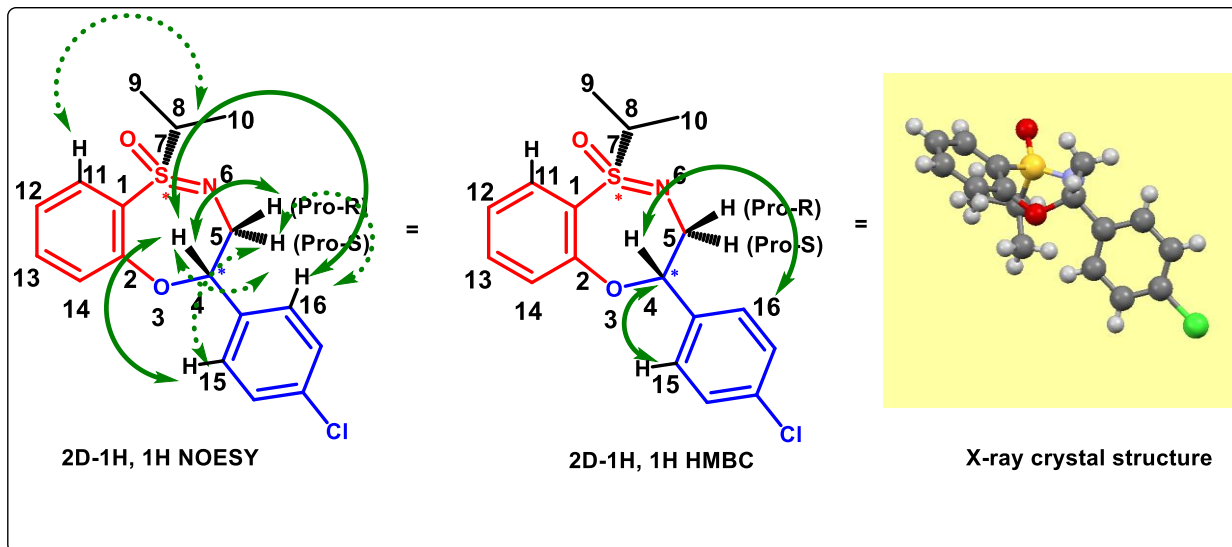

**Figure S1**-Characteristics NOESY and HMBC correlation for compound **(R,S)-4q**

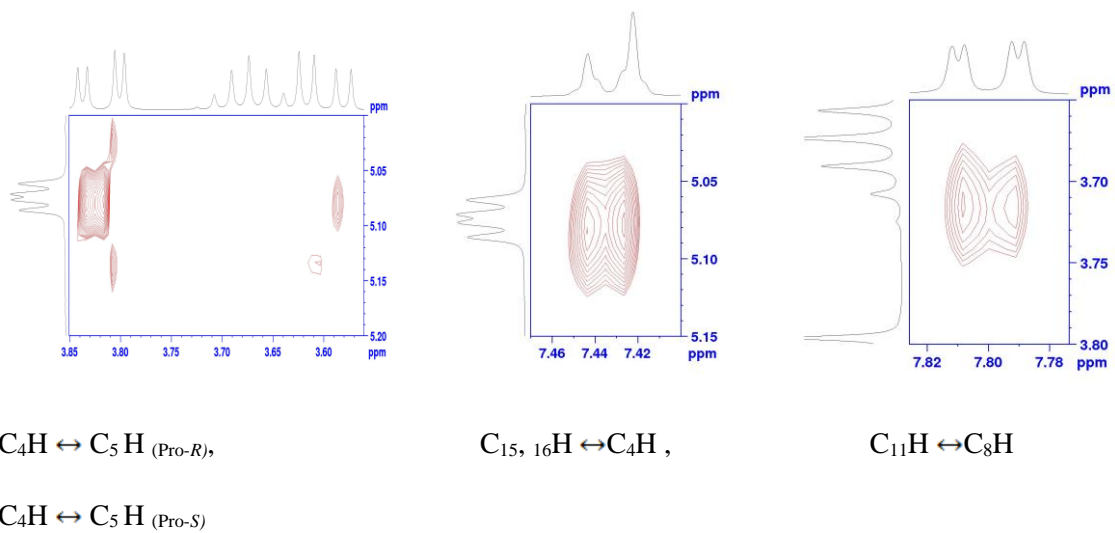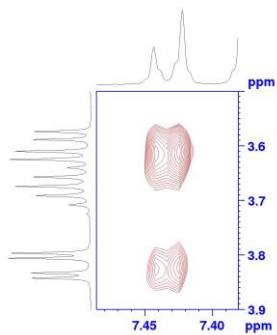

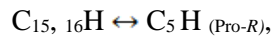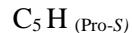

**Figure S2-** Characteristics NOESY correlation for compound (*R,S*)-**4q**

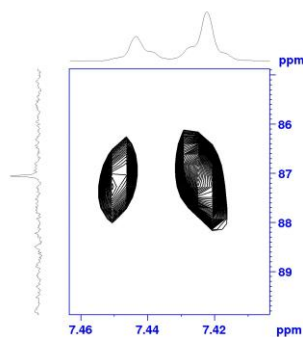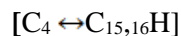

**Figure S3-** Characteristics HMBC correlation for compound (*R,S*)-**4q**

## 5.2 Stereochemistry analysis of the exact structure of **4r**

### NMR Study

NMR spectra were recorded on Bruker Advance DPX 200FT, Bruker Robotics, Bruker DRX 400 Spectrometers at 400 MHz ( $^1H$ ) and 125 MHz ( $^{13}C$ ) in suitable solvents ( $CDCl_3$ ). Resonance assignments were carried out using various one dimensional, two-dimensional experiments. Single isomer of **4r** was separable & that was proved by integration of  $^1H$  NMR spectra (**21H** protons) along with molecular formula  $C_{15}H_{21}NO_2S$  of both the compounds. The formation of seven membered ring was confirmed by two dimensional NOESY, HSQC experiments. From NOESY (*R,R,S*)-**4r**,  $C_6H$  (3.37-3.33 ppm) shows moderate interaction with  $C_1 H$  (1.29 ppm),  $C_{11} H$  has no such interaction with  $C_1/ C_2/ C_3 H$ 's So  $C_6$  proton is in above orientation while  $C_{11}$  proton is in below orientation.



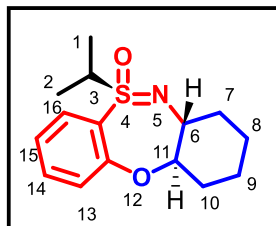

| Proton             | <sup>1</sup> H Chemical shift and coupling constant | <sup>13</sup> C Chemical shift |
|--------------------|-----------------------------------------------------|--------------------------------|
| C <sub>1</sub> H   | 1.29 (d, <i>J</i> = 6.8 Hz)                         | 14.2                           |
| C <sub>2</sub> H   | 1.16 (d, <i>J</i> = 6.8 Hz)                         | 16.2                           |
| C <sub>3</sub> H   | 3.88-3.79(m)                                        | 51.0                           |
| C <sub>6</sub> H   | 3.37-3.31(m)                                        | 62.0                           |
| C <sub>11</sub> H  | 3.77-3.71 (m)                                       | 89.9                           |
| C <sub>8,9</sub> H | 1.54-1.33(m)                                        | 32.8                           |

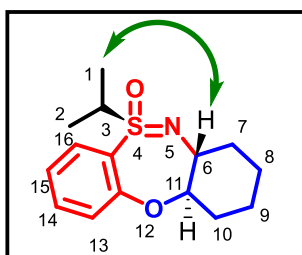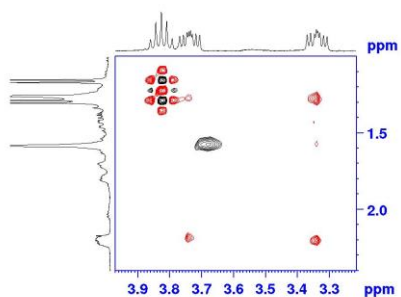

**Figure S4-** Characteristics NOESY correlation for compound (*R,R,S*)-4r

### 5.3 Stereochemistry analysis of the exact structure of 4z and 4z'

#### NMR Study

NMR spectra were recorded on Bruker Advance DPX 200FT, Bruker Robotics, Bruker DRX 300 and 400 Spectrometers at 200, 300, 400 MHz (<sup>1</sup>H) and 100, 125 MHz (<sup>13</sup>C) in suitable solvents (CDCl<sub>3</sub>, DMSO-D<sub>6</sub>). Resonance assignments were carried out using various one dimensional, two-dimensional experiments.

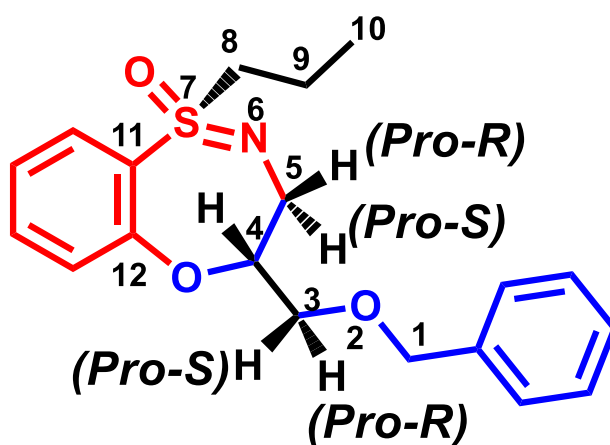

| Proton                              | <sup>1</sup> H Chemical shift and coupling constant | <sup>13</sup> C Chemical shift |
|-------------------------------------|-----------------------------------------------------|--------------------------------|
| C <sub>1</sub> H                    | 4.63 (s)                                            | 73.5                           |
| C <sub>3</sub> H <sub>(Pro-S)</sub> | 3.72 (dd, <i>J</i> = 10, 4.9 Hz)                    | 70.6                           |
| C <sub>3</sub> H <sub>(Pro-R)</sub> | 3.83 (dd, <i>J</i> = 14.6, 6.0 Hz)                  | 70.6                           |
| C <sub>4</sub> H                    | 4.30-4.27 (m)                                       | 85.2                           |
| C <sub>5</sub> H <sub>(Pro-R)</sub> | 3.57 (dd, <i>J</i> = 14.7, 6.0 Hz)                  | 46.2                           |

|                                         |                                       |             |
|-----------------------------------------|---------------------------------------|-------------|
|                                         | 3.4 Hz)                               |             |
| <b>C<sub>5</sub>H<sub>(Pro-S)</sub></b> | <b>3.49 (dd, J= 14.7,<br/>4.7 Hz)</b> | <b>46.2</b> |
| <b>C<sub>8</sub>H</b>                   | <b>3.33-3.18(m)</b>                   | <b>57.8</b> |
| <b>C<sub>9</sub>H</b>                   | <b>1.76-1.68(m)</b>                   | <b>16.9</b> |
| <b>C<sub>10</sub>H</b>                  | <b>0.94(t, J=7.4 Hz)</b>              | <b>12.8</b> |

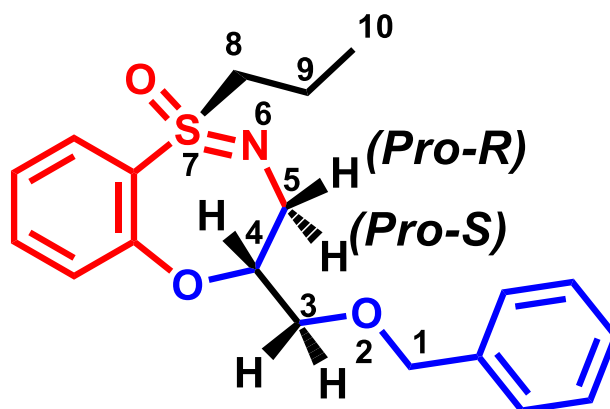

**Table:-** Chemical shift assignment for *(R,S)*-4z'

| <b>Proton</b>                           | <b><sup>1</sup>H Chemical shift and coupling constant</b> | <b><sup>13</sup>C Chemical shift</b> |
|-----------------------------------------|-----------------------------------------------------------|--------------------------------------|
| <b>C<sub>1</sub>H</b>                   | <b>4.52 (q, J= 27, 12 Hz)</b>                             | <b>73.3</b>                          |
| <b>C<sub>3</sub>H<sub>(Pro-S)</sub></b> | <b>3.49-3.46 (m)</b>                                      | <b>68.6</b>                          |
| <b>C<sub>3</sub>H<sub>(Pro-R)</sub></b> | <b>3.34 (dd, J =10.8,</b>                                 | <b>68.6</b>                          |

|                                         |                          |              |
|-----------------------------------------|--------------------------|--------------|
|                                         | <b>3.4 Hz)</b>           |              |
| <b>C<sub>4</sub>H</b>                   | <b>4.67-4.62(m)</b>      | <b>84.2</b>  |
| <b>C<sub>5</sub>H<sub>(Pro-R)</sub></b> | <b>3.30-3.27 (m)</b>     | <b>44.9</b>  |
| <b>C<sub>5</sub>H<sub>(Pro-S)</sub></b> | <b>3.44-3.40(m)</b>      | <b>44.9</b>  |
| <b>C<sub>8</sub>H</b>                   | <b>3.27-3.19(m)</b>      | <b>59.2</b>  |
| <b>C<sub>9</sub>H</b>                   | <b>1.81-1.71(m)</b>      | <b>17.10</b> |
| <b>C<sub>10</sub>H</b>                  | <b>0.94(t, J=7.4 Hz)</b> | <b>12.8</b>  |
| <b>C<sub>12</sub>H</b>                  | <b>0.94(t, J=7.4 Hz)</b> | <b>152.5</b> |

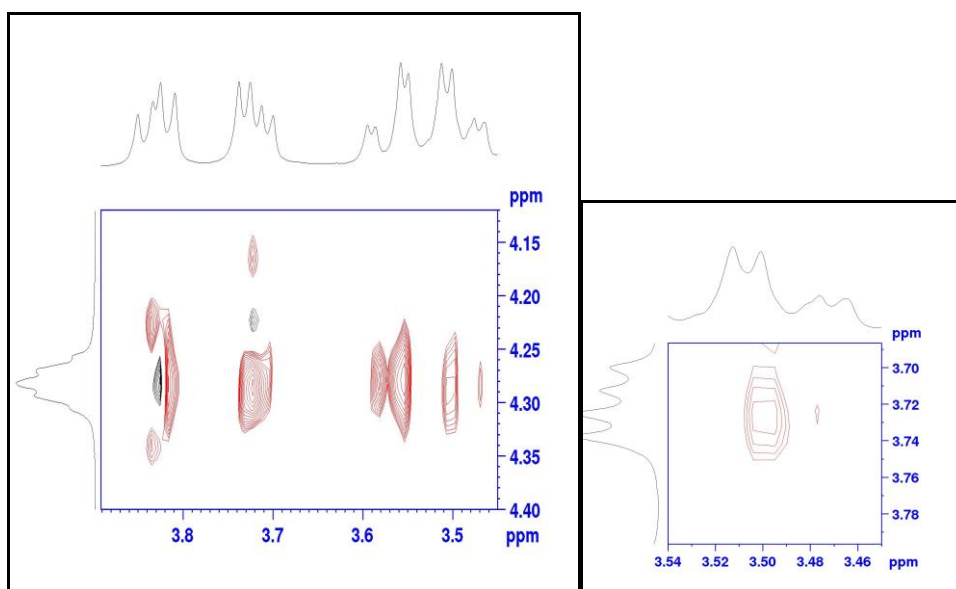

**Figure S5-** Characteristics NOESY correlation for compound (*R,R*)-**4z**[C<sub>4</sub>H (3 ppm) ↔ C<sub>3</sub> H<sub>(Pro-R)</sub> (3.83 ppm), C<sub>4</sub>H (4.30-4.27 ppm) ↔ C<sub>3</sub> H<sub>(Pro-S)</sub> (3.72 ppm), C<sub>4</sub>H (4.30-4.27 ppm) ↔ C<sub>5</sub> H<sub>(Pro-R)</sub> (3.57 ppm) , C<sub>4</sub>H (4.30-4.27 ppm) ↔ C<sub>5</sub> H<sub>(Pro-S)</sub> (3.49 ppm) and C<sub>5</sub> H<sub>(Pro-S)</sub> (3.49 ppm)↔C<sub>3</sub> Pro S H C<sub>3</sub> H<sub>(Pro-S)</sub> (3.72 ppm)]

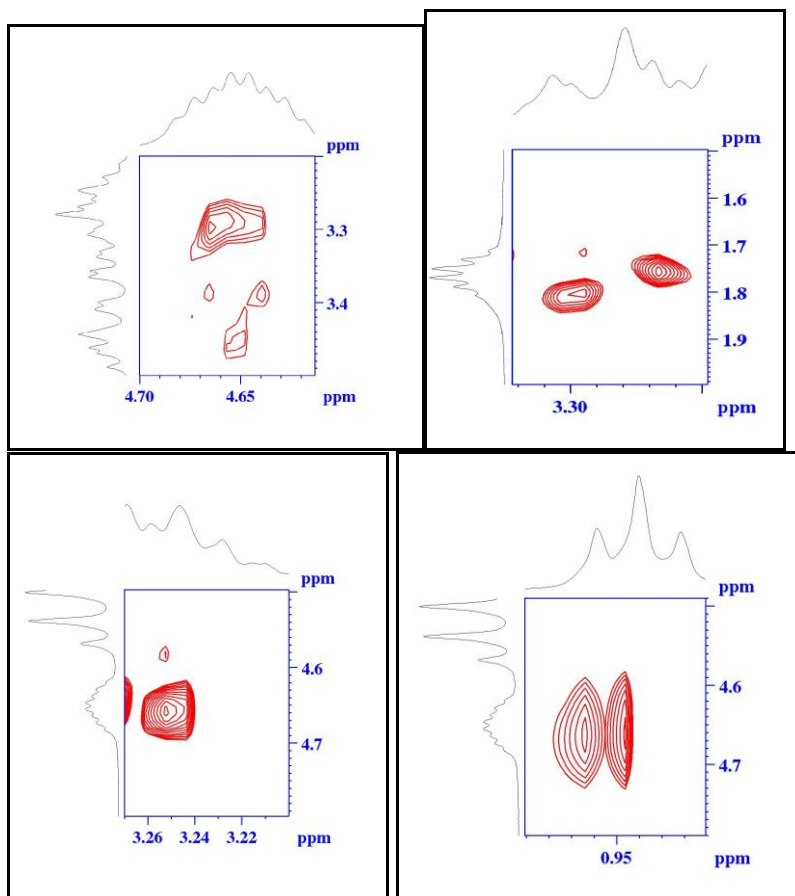

**Figure S6-** Characteristics NOESY correlation for compound **(R,S)-4z'** [C<sub>4</sub>H (4.67-4.62 ppm)

↔ C<sub>10</sub> H (0.94 ppm), C<sub>4</sub>H (4.67-4.62 ppm) ↔ C<sub>8</sub> H<sub>(Pro-S)</sub> (3.27-3.19 ppm), C<sub>4</sub>H (4.67-4.62 ppm) ↔

C<sub>5</sub> H<sub>(Pro-R)</sub> (3.30-3.27 ppm), C<sub>4</sub>H (4.67-4.62 ppm) ↔ C<sub>5</sub> H<sub>(Pro-S)</sub> (3.44-3.40 ppm)]

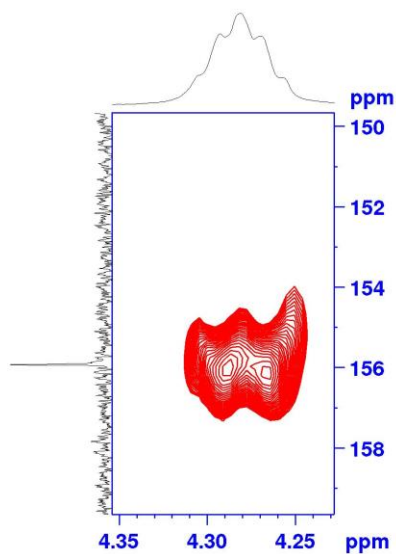

**Figure S7**-Characteristics HMBC correlation for compound (*R,R*)-**4z**[ $C_4H$  ( $\delta$  4.30-4.27 ppm)  $\leftrightarrow$   $C_{12}$  (156.0 ppm)]

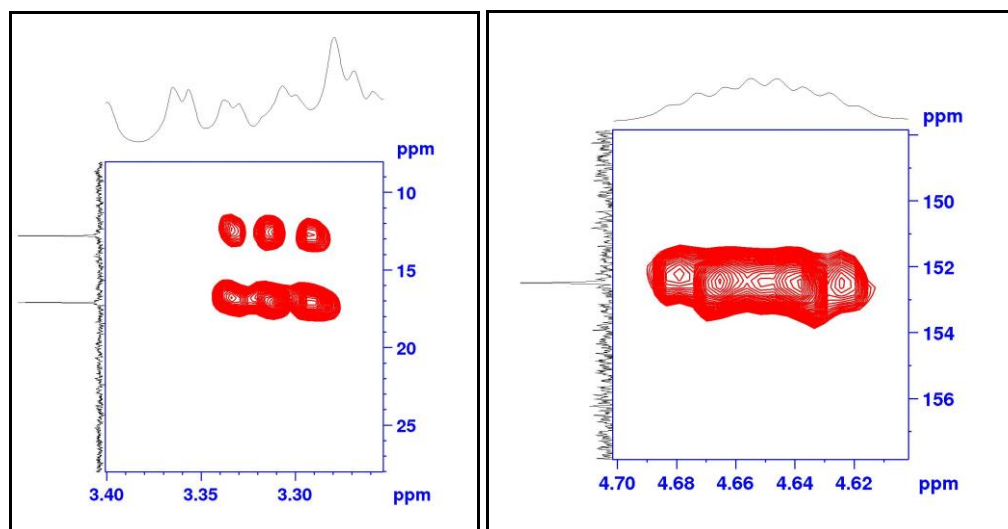

**Figure S8**-Characteristics HMBC correlation for compound (*R,S*)-**4z'**[ $C_4H$  ( $\delta$  4.30-4.27 ppm)  $\leftrightarrow$   $C_{12}$  (152.5 ppm),  $C_5 H_{(Pro-S)}$  (3.44-3.40 ppm)  $\leftrightarrow$   $C_4$  (84.2 ppm),  $C_5 H_{(Pro-R)}$  (3.30-3.27 ppm)  $\leftrightarrow$   $C_4$  (84.2 ppm),  $C_5 H_{(Pro-R)}$  (3.30-3.27 ppm)  $\leftrightarrow$  both  $C_9$  (17.10 ppm)  $C_{10}$  (12.8 ppm)]

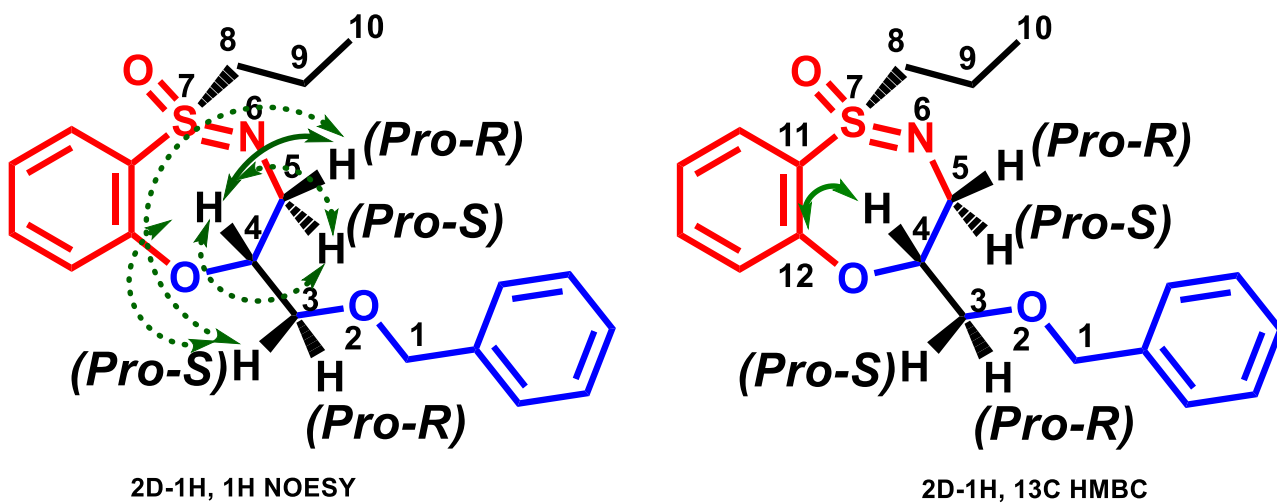

Figure S9- Characteristics NOESY and HMBC correlation for compound (*R,R*)-4z

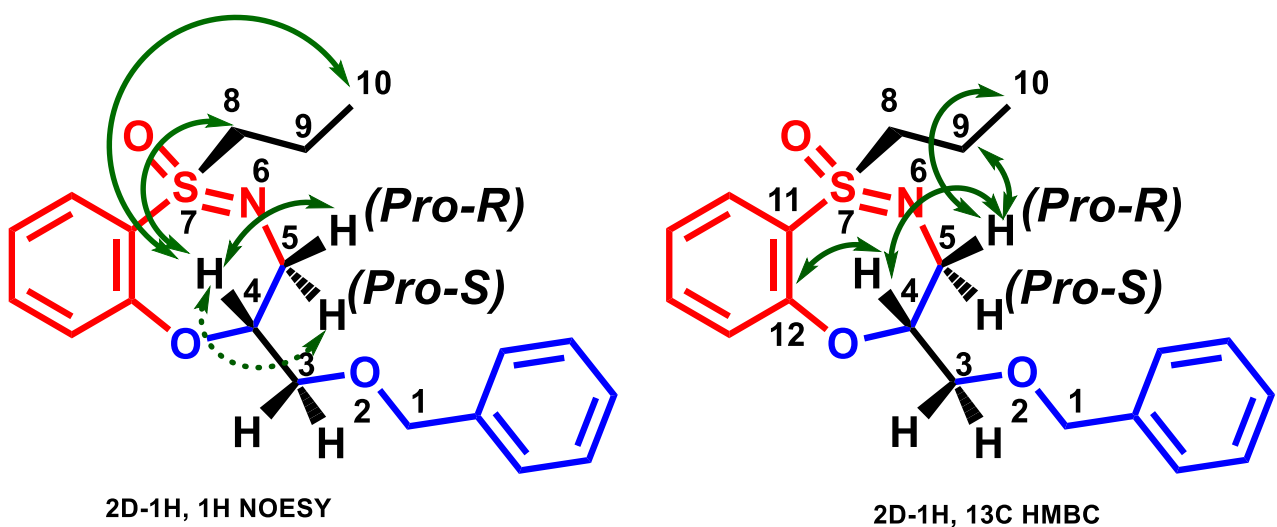

Figure S10- Chemical shift NOESY and HMBC assignment for (*R,S*)-4z'

#### 5.4 Stereochemistry analysis of the exact structure of 4zb

##### NMR Study





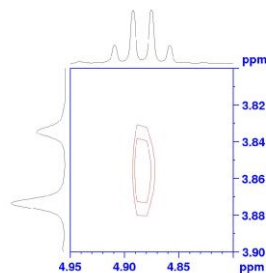

**Figure S11-** Characteristics NOESY correlation for compound (*S,S*)-**4zb**[C<sub>6</sub>H (4.91-4.86 ppm)

↔ C<sub>4</sub> H (<sub>Pro-S</sub>) (3.87-3.83 ppm)]

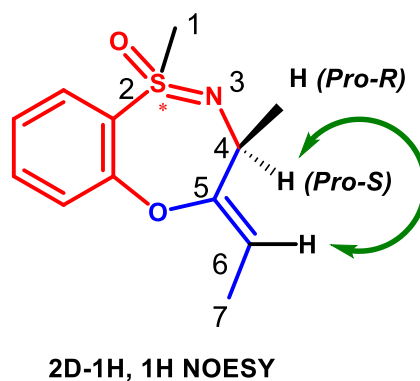

**Figure S12-**Chemical shift NOESY assignment for **4zb**

## 6. X-ray Crystallographic Information

### 6.1 X-Ray Crystallography data of compound 4p

Single-crystal diffraction analysis data were collected at 296K with a Bruker APEX-II CCD Duo diffractometer (operated at 1500 W power: 50 kV, 30 mA) using graphite monochromatic Mo K $\alpha$  radiation ( $\lambda = 0.71073 \text{ \AA}$ ).

Sample preparation for crystal growth- The 5 mg compound (3g) was taken in a 1 ml HPLC glass vial & compound was dissolved in 1ml acetonitrile solvent (lower solubility). This HPLC vial was placed in a 15ml glass vial which already contains 2-3ml of hexane. Then the vial was closed by wrapping with aluminium foil & one small niddle

was attached on the neck. Kept it for 4 to 5 day for growing of crystal. Slow evaporation at room temperature in a dark place till crystals formed.

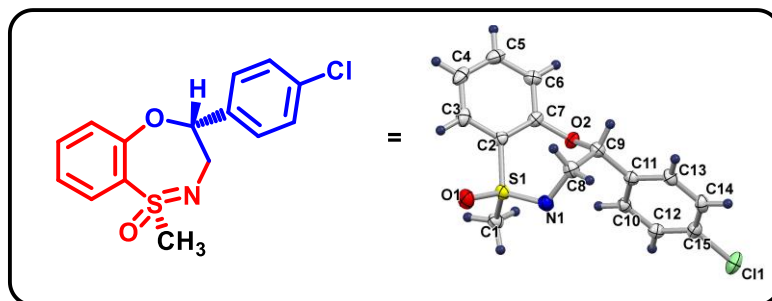

**Figure S13-** ORTEP diagram drawn with 50% ellipsoid for non-H atoms of the crystal structure of compound 4p determined at 296K (CCDC deposition No. 2113397)

#### checkCIF/PLATON report

Structure factors have been supplied for datablock(s) AB\_175

THIS REPORT IS FOR GUIDANCE ONLY. IF USED AS PART OF A REVIEW PROCEDURE FOR PUBLICATION, IT SHOULD NOT REPLACE THE EXPERTISE OF AN EXPERIENCED CRYSTALLOGRAPHIC REFEREE.

No syntax errors found. CIF dictionary Interpreting this report

#### Datablock: AB\_175

|                        |                                            |                               |                          |
|------------------------|--------------------------------------------|-------------------------------|--------------------------|
| Bond precision:        | C-C = 0.0019 Å                             | Wavelength=0.71073            |                          |
| Cell:                  | a=9.9201(3)<br>alpha=90                    | b=7.5619(2)<br>beta=99.478(1) | c=18.7671(5)<br>gamma=90 |
| Temperature:           | 296 K                                      |                               |                          |
| Volume                 | Calculated<br>1388.59(7)                   | Reported<br>1388.59(7)        |                          |
| Space group            | P 21/n                                     | P 21/n                        |                          |
| Hall group             | -P 2yn                                     | -P 2yn                        |                          |
| Moiety formula         | C15 H14 Cl N O2 S                          | C15 H14 Cl N O2 S             |                          |
| Sum formula            | C15 H14 Cl N O2 S                          | C15 H14 Cl N O2 S             |                          |
| Mr                     | 307.78                                     | 307.78                        |                          |
| Dx, g cm <sup>-3</sup> | 1.472                                      | 1.472                         |                          |
| Z                      | 4                                          | 4                             |                          |
| Mu (mm <sup>-1</sup> ) | 0.425                                      | 0.425                         |                          |
| F000                   | 640.0                                      | 640.0                         |                          |
| F000'                  | 641.32                                     |                               |                          |
| h, k, lmax             | 13, 10, 25                                 | 13, 10, 25                    |                          |
| Nref                   | 3478                                       | 3459                          |                          |
| Tmin, Tmax             | 0.894, 0.938                               | 0.411, 0.590                  |                          |
| Tmin'                  | 0.880                                      |                               |                          |
| Correction method=     | # Reported T Limits: Tmin=0.411 Tmax=0.590 |                               |                          |
| AbsCorr =              | MULTI-SCAN                                 |                               |                          |
| Data completeness=     | 0.995                                      | Theta(max)= 28.386            |                          |
| R(reflections)=        | 0.0300( 3017)                              | wR2(reflections)=             | 0.1158( 3459)            |
| S =                    | 0.925                                      | Npar=                         | 182                      |

## 6.2 X-Ray Crystallography data of compound 4q

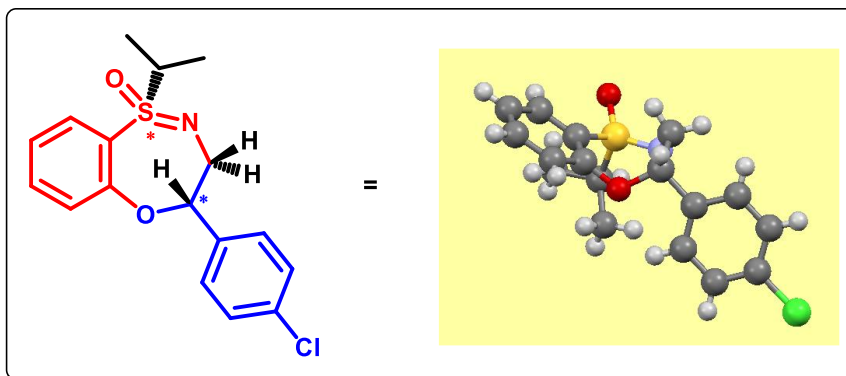

**Figure S14-** ORTEP diagram drawn with 50% ellipsoid for non-H atoms of the crystal structure of compound **4q** determined at 273K (CCDC deposition No. 2113503)

Single-crystal diffraction analysis data were collected at 273.15K with a Bruker APEX-II CCD Duo diffractometer (operated at 1500 W power: 50 kV, 30 mA) using graphite monochromatic Mo K $\alpha$  radiation ( $\lambda = 0.71073 \text{ \AA}$ ). Sample preparation for crystal growth- The 5 mg compound (3g) was taken in a 1 ml HPLC glass vial & compound was dissolved in 1ml acetonitrile solvent (lower solubility). This HPLC vial was placed in a 15ml glass vial which already contains 2-3ml of hexane. Then the vial was closed by wrapping it with aluminium foil & one small niddle was attached to the neck. Kept it for 4 to 5 days for growing of the crystal. Slow evaporation at room temperature in a dark place till crystals form.

### checkCIF/PLATON report

Structure factors have been supplied for datablock(s) AB\_176A

THIS REPORT IS FOR GUIDANCE ONLY. IF USED AS PART OF A REVIEW PROCEDURE FOR PUBLICATION, IT SHOULD NOT REPLACE THE EXPERTISE OF AN EXPERIENCED CRYSTALLOGRAPHIC REFEREE.

No syntax errors found. CIF dictionary Interpreting this report

#### Datablock: AB\_176A

---

Bond precision: C-C = 0.0021 Å Wavelength=0.71073

Cell: a=8.4820 (5) b=9.2719 (6) c=20.5792 (12)  
alpha=90 beta=95.217 (2) gamma=90

Temperature: 273 K

|                        | Calculated        | Reported          |
|------------------------|-------------------|-------------------|
| Volume                 | 1611.73 (17)      | 1611.73 (17)      |
| Space group            | P 21/n            | P 21/n            |
| Hall group             | -P 2yn            | -P 2yn            |
| Moiety formula         | C17 H18 Cl N O2 S | C17 H18 Cl N O2 S |
| Sum formula            | C17 H18 Cl N O2 S | C17 H18 Cl N O2 S |
| Mr                     | 335.83            | 335.83            |
| Dx, g cm <sup>-3</sup> | 1.384             | 1.384             |
| Z                      | 4                 | 4                 |
| Mu (mm <sup>-1</sup> ) | 0.373             | 0.373             |
| F000                   | 704.0             | 704.0             |
| F000'                  | 705.34            |                   |
| h, k, lmax             | 11, 12, 27        | 11, 12, 27        |
| Nref                   | 4039              | 4027              |
| Tmin, Tmax             | 0.914, 0.949      | 0.914, 0.949      |
| Tmin'                  | 0.891             |                   |

Correction method= # Reported T Limits: Tmin=0.914 Tmax=0.949  
AbsCorr = MULTI-SCAN

Data completeness= 0.997 Theta(max)= 28.365

R(reflections)= 0.0350 ( 3461) wR2(reflections)=  
S = 0.895 Npar= 201 0.1292 ( 4027)

1. K. Oyaizu, T. Mikami, F. Mitsuhashi, E. Tsuchida, *Macromolecules*, 2002, **35**, 67–78.
2. S. Ponra, A. Nyadanu, N. Pan, E. Martinand-Lurin, A. Savy, M. Vitale, L. E. K. L. Grimaud, *Org. Process Res. Dev.* 2020, **24**, 5, 827–834.
3. A. Tota, M. Zenzola, S. J. Chawner, S. St. John-Campbell, C. Carlucci, G. Romanazzi, L. Degennaro, J. A. Bullb, R. Luisia, *Chem. Commun.* 2017, **53**, 348-351.
4. D. Limnios, C. G. Kokotos, *J. Org. Chem.* 2014, **79**, 4270–4276.
5. O- C. Finch, D. P. Furkert, M.A. Brimble, *Tetrahedron*, 2014, **70**, 590-596.
6. L. Chen, Z. Wang, Y. Wang, L. Hao, X. Xu, G. Wu, Y. Ji, *Org. Biomol. Chem.*, 2022, **20**, 887–894.
7. C. Wu, R. Huang, M. Zhang, Z. Chen, *J. Org. Chem.* 2020, **85**, 841–850.

# Supporting Information

**Transition metal-free, base mediated one-pot approach for the construction of benzo[*b*] [1,4,5]oxathiazepine 1-oxide core**

Arpita Banerjee and Gautam Panda\*

*Medicinal and Process Chemistry Division, CSIR-Central Drug Research Institute, Sector-10, Jankipuram Extension, Lucknow-226031, India. EMAIL: gautam.panda@gmail.com; gautam\_panda@cdri.res.in*

## **Table of Contents**

1. <sup>1</sup>H, <sup>13</sup>C, <sup>19</sup>F, DEPT-135, 2D NMR, diastereomeric ratio calculation, HRMS and HPLC data of Compounds

## **Page No.**

S2-S195

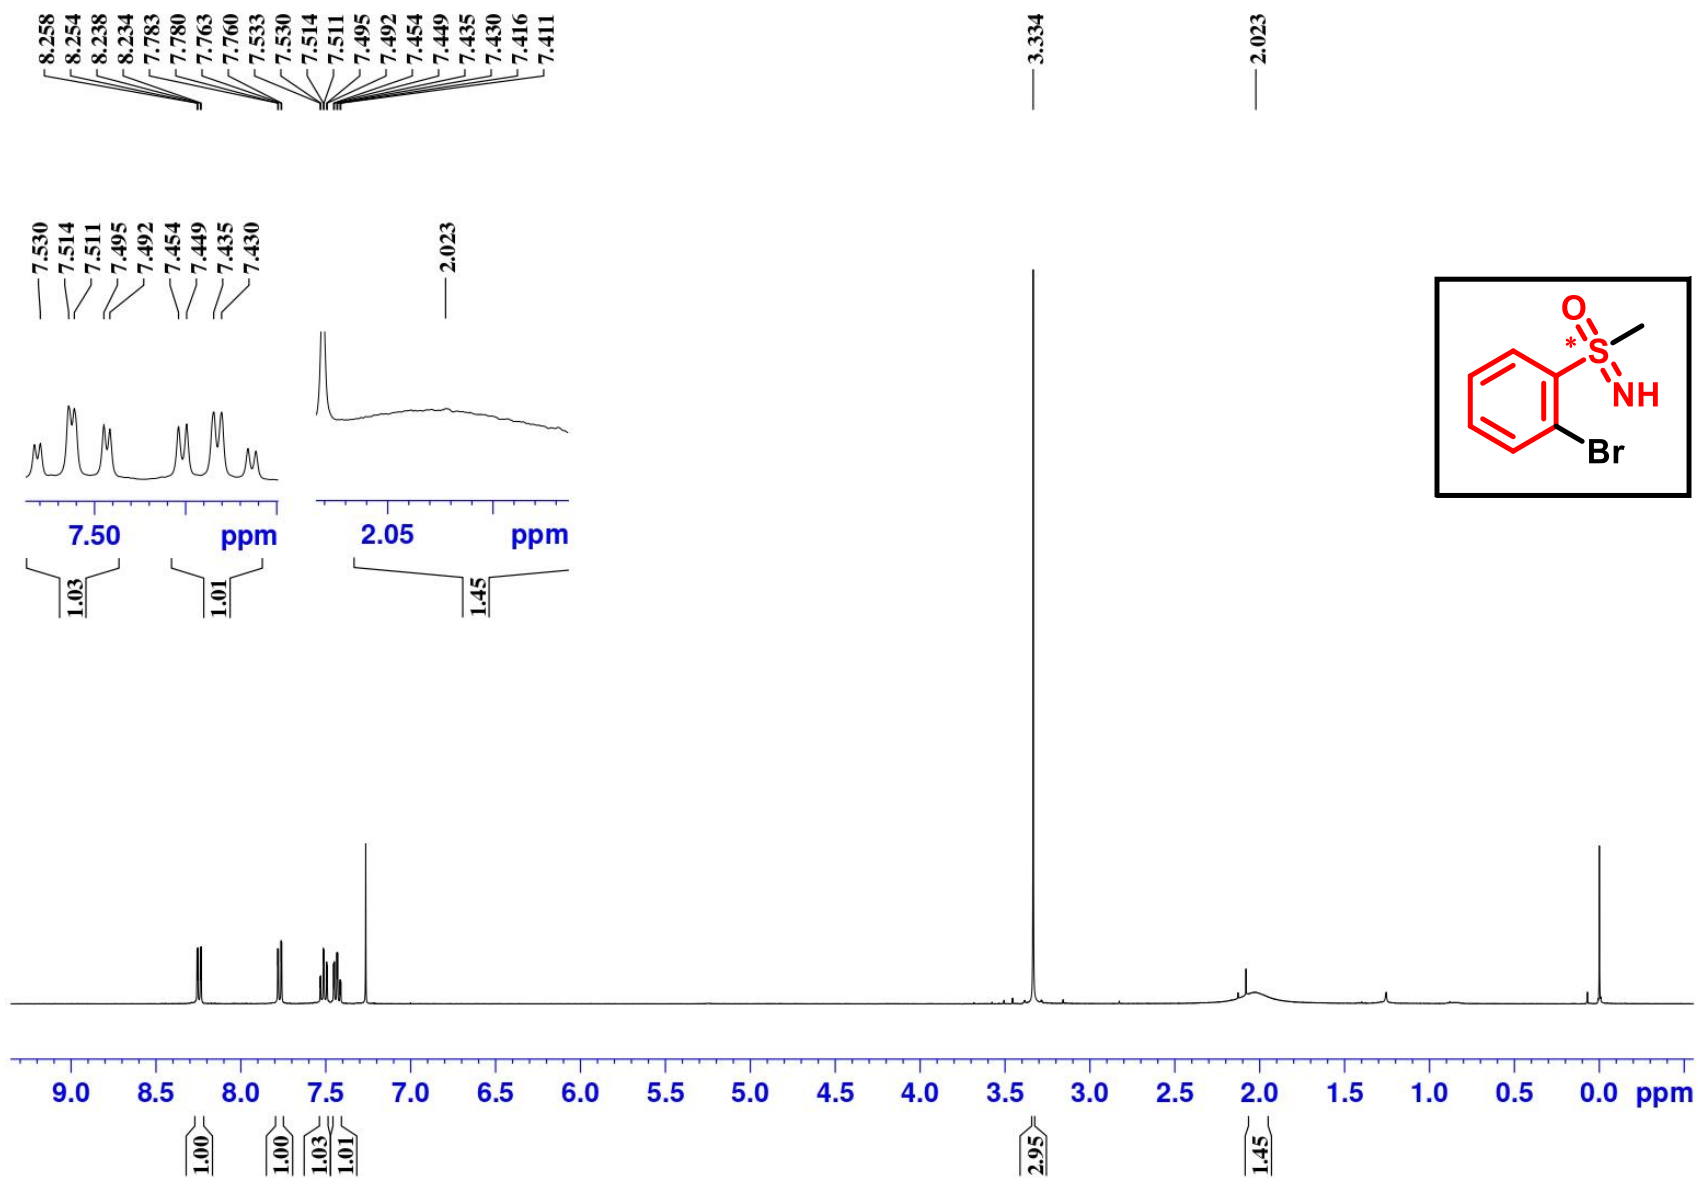

**Fig S-1:**  $^1\text{H}$  NMR Spectra of Compound 2a (400 MHz,  $\text{CDCl}_3$ )

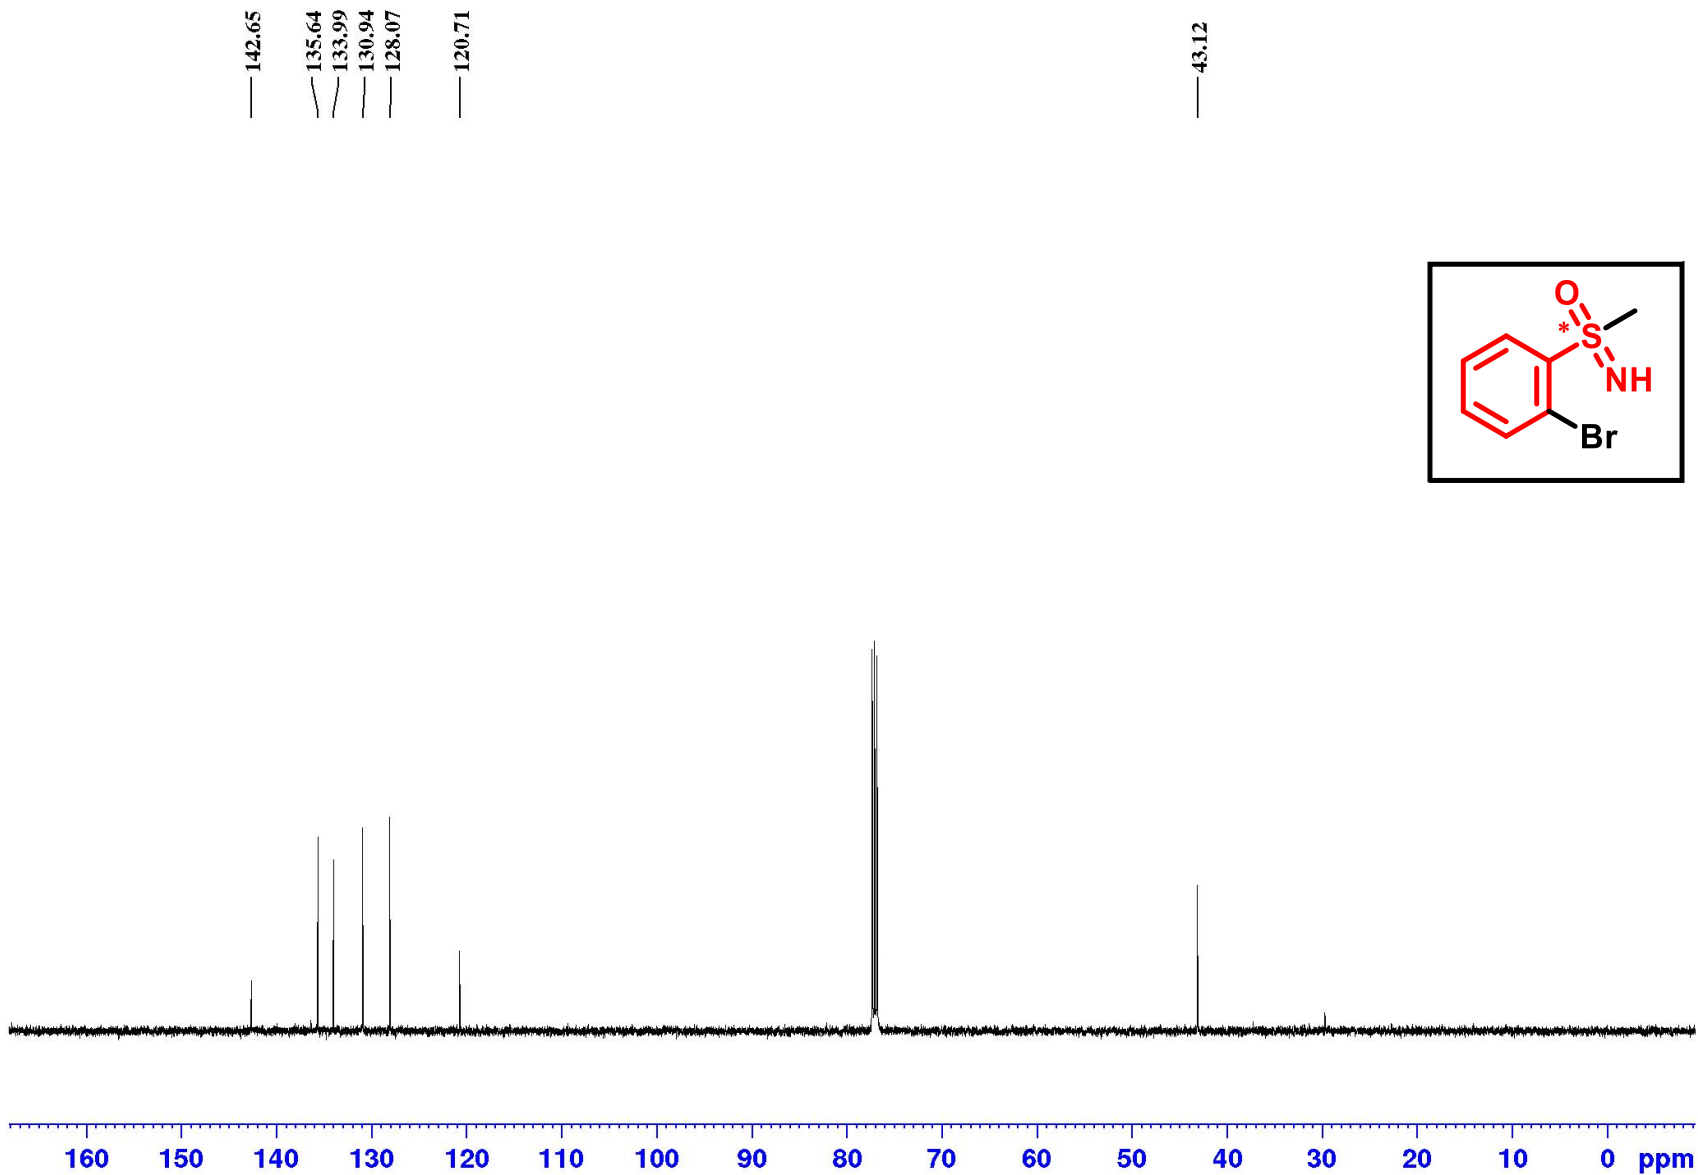

**Fig S-2:**  $^{13}\text{C}$  NMR Spectra of Compound **2a** (125 MHz,  $\text{CDCl}_3$ )

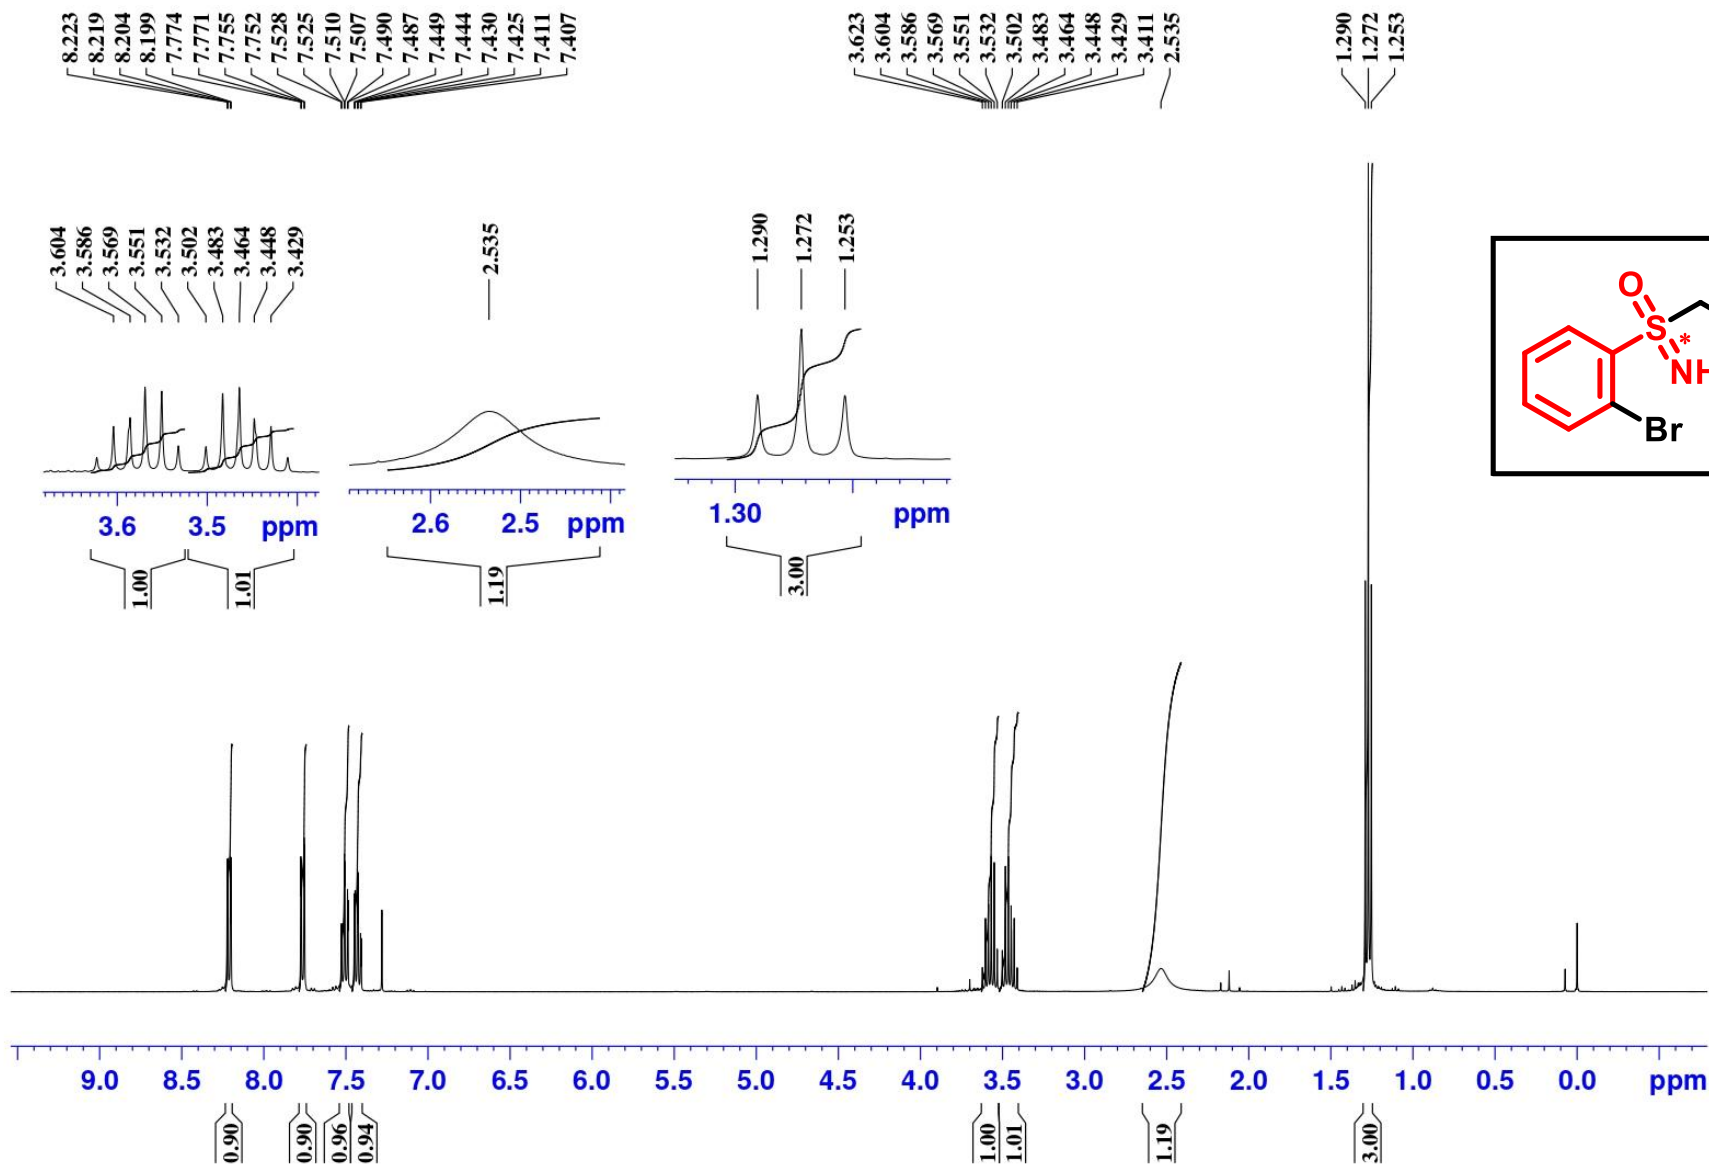

**Fig S-3:  $^1\text{H}$  NMR Spectra of Compound 2b (400 MHz,  $\text{CDCl}_3$ )**



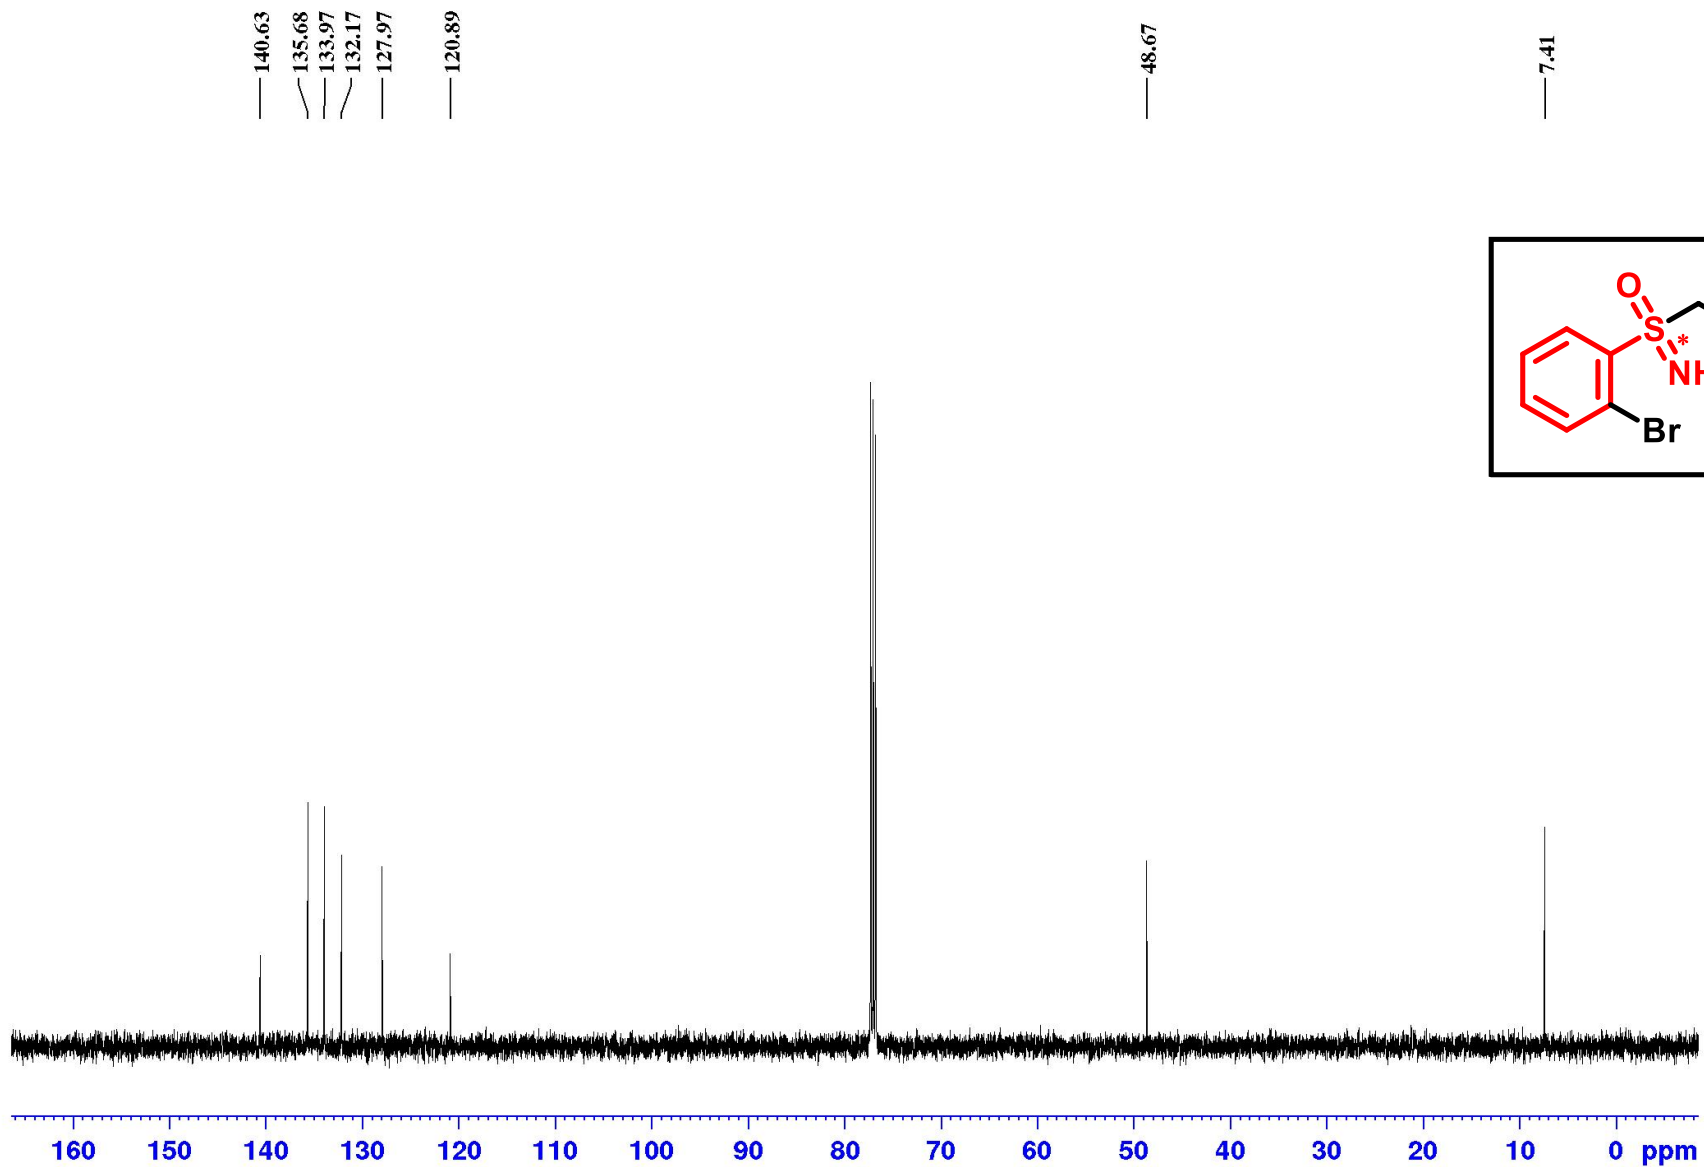

**Fig S-4:**  $^{13}\text{C}$  NMR Spectra of Compound 2b (125 MHz,  $\text{CDCl}_3$ )

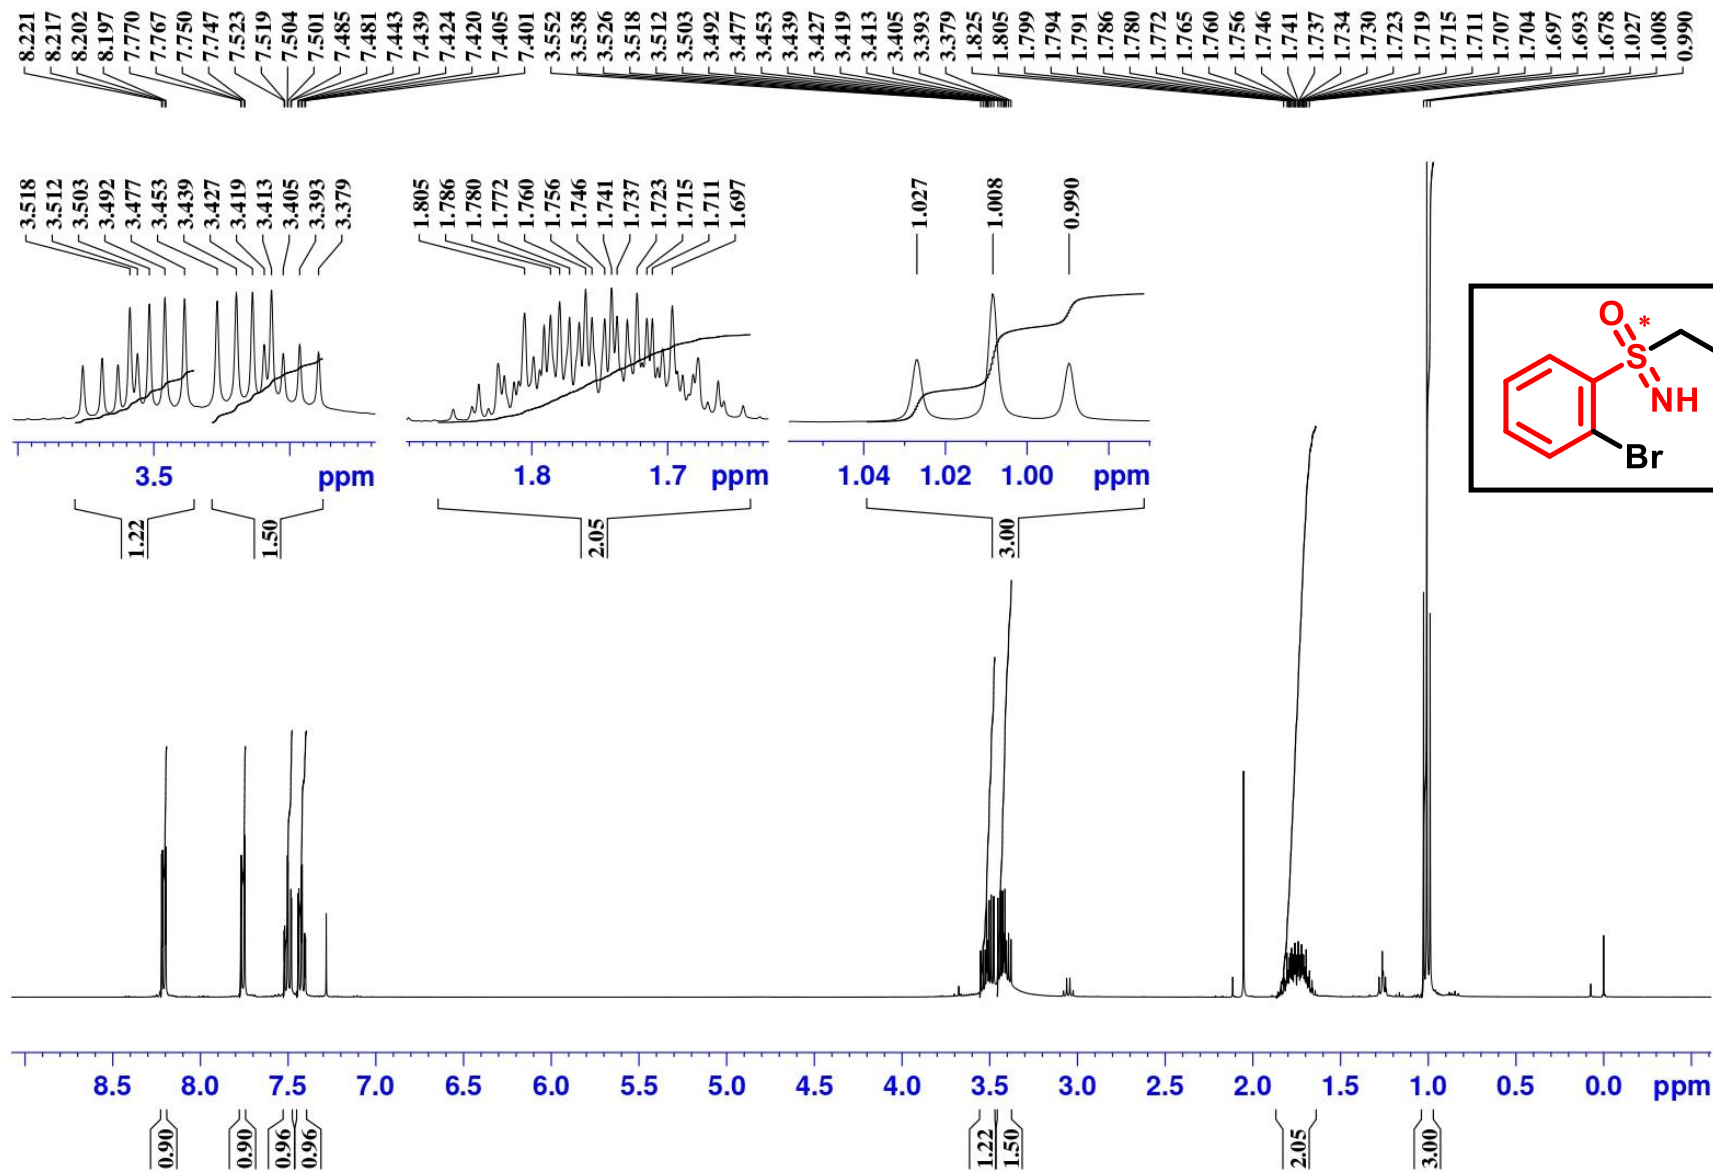

**Fig S-5:**  $^1\text{H}$  NMR Spectra of Compound 2c (400 MHz,  $\text{CDCl}_3$ )

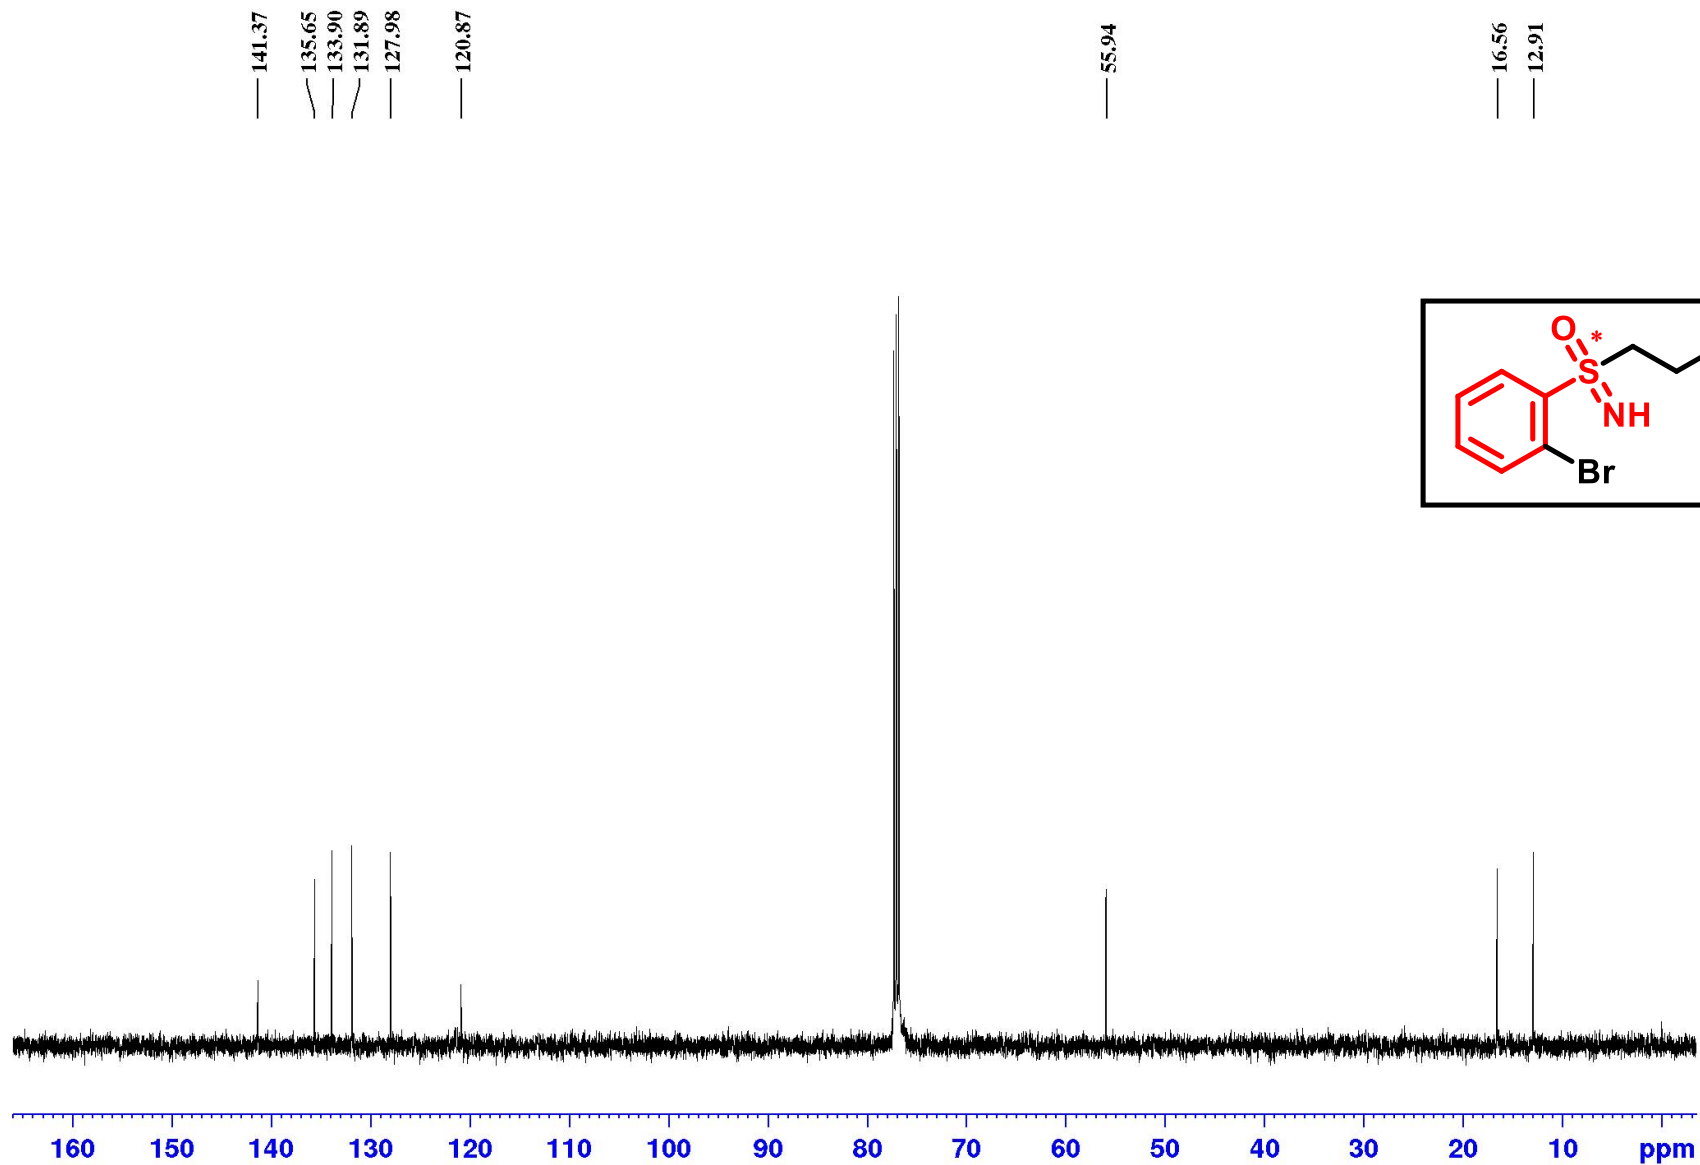

**Fig S-6:**  $^{13}\text{C}$  NMR Spectra of Compound **2c** (125 MHz,  $\text{CDCl}_3$ )

|               |                  |             |             |                 |              |                        |                     |
|---------------|------------------|-------------|-------------|-----------------|--------------|------------------------|---------------------|
| Sample Name   | 2c               | Position    | Vial 31     | Instrument Name | Instrument 1 | User Name              |                     |
| Inj Vol       | 1                | InjPosition |             | SampleType      | Sample       | IRM Calibration Status | Some Ions Missed    |
| Data Filename | HRMS22I02AUG30.d | ACQ Method  | ISOCRATIC.m | Comment         |              | Acquired Time          | 8/2/2022 1:18:54 PM |

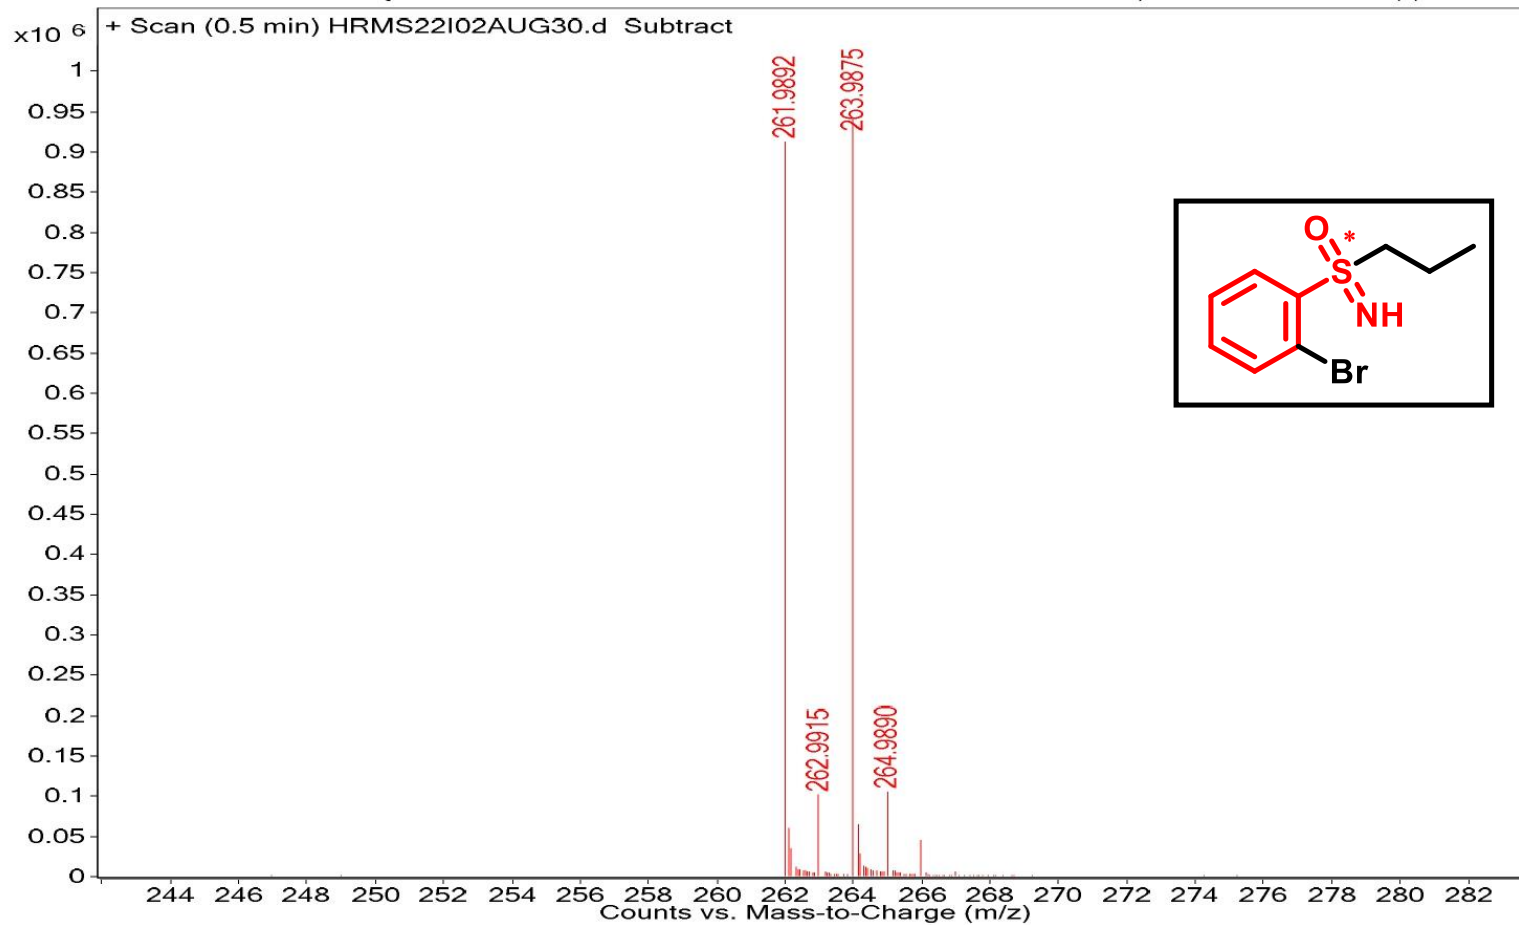

**Fig S-7:** HRMS report of Compound **2c**

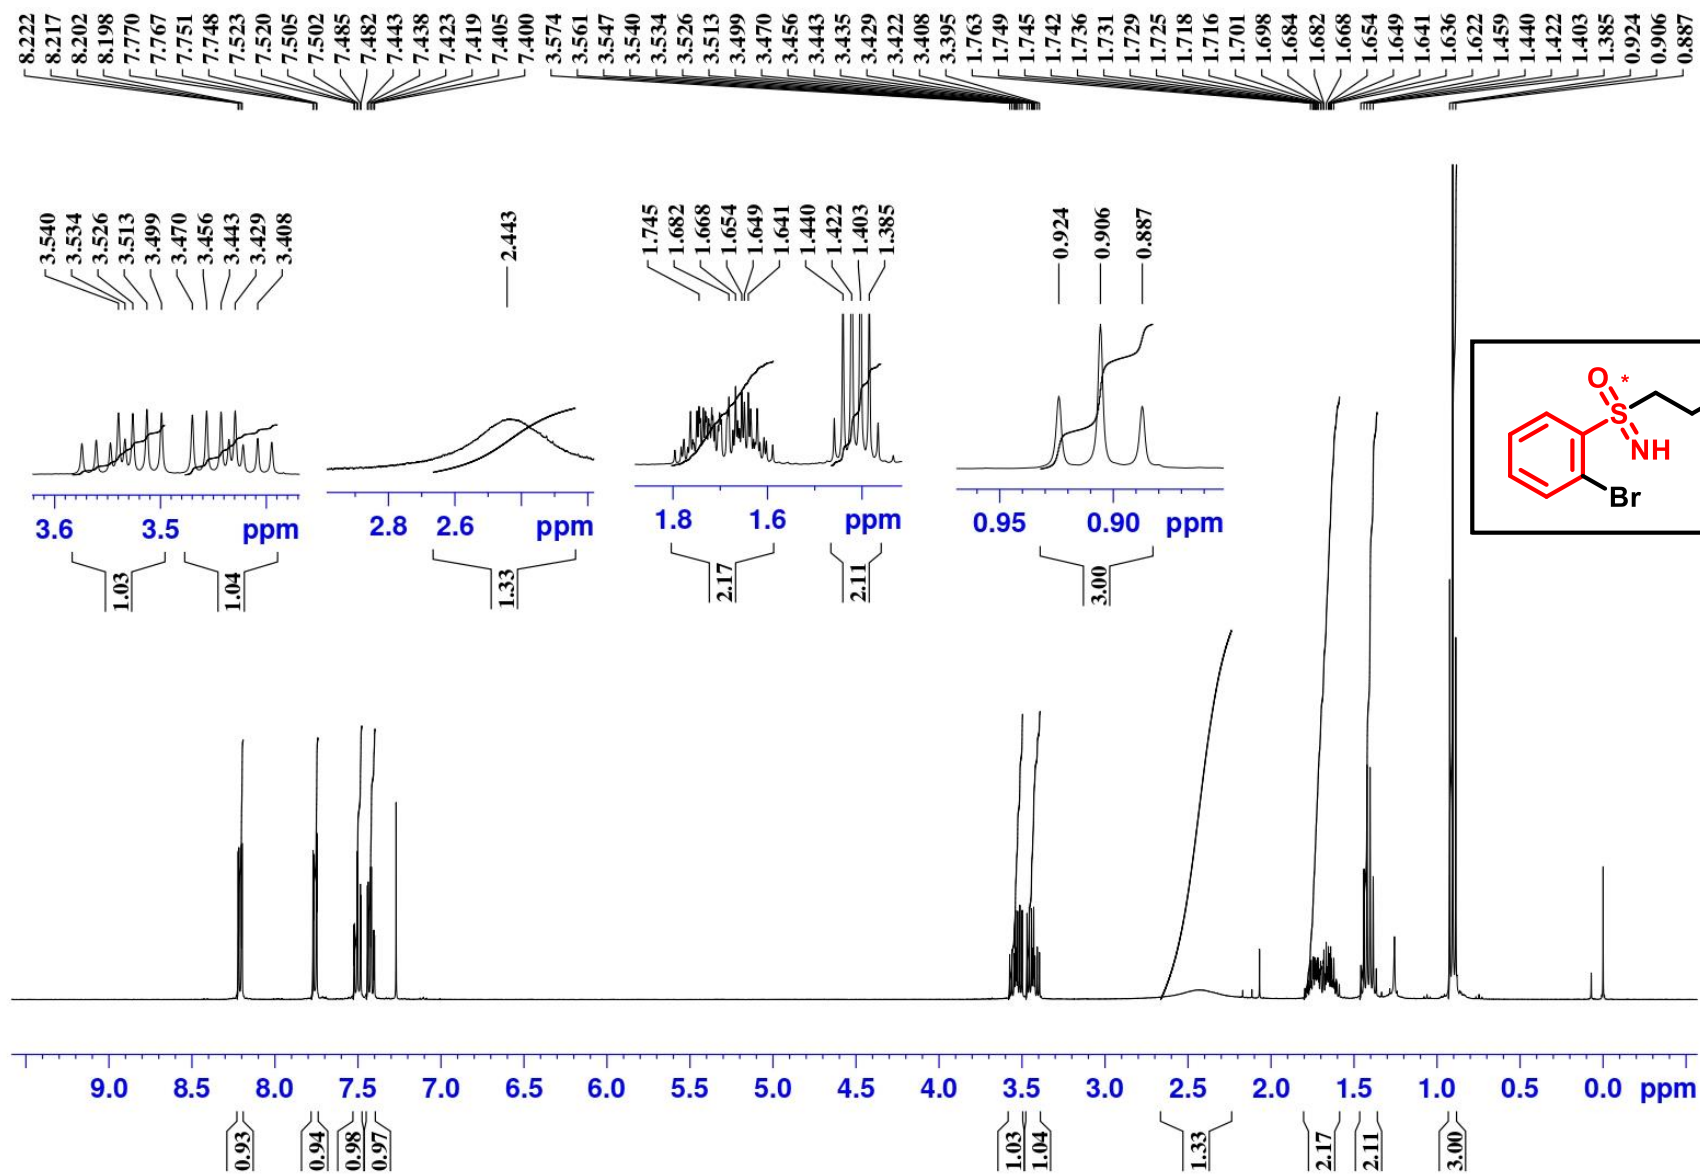

**Fig S-8:**  $^1\text{H}$  NMR Spectra of Compound **2d** (400 MHz,  $\text{CDCl}_3$ )

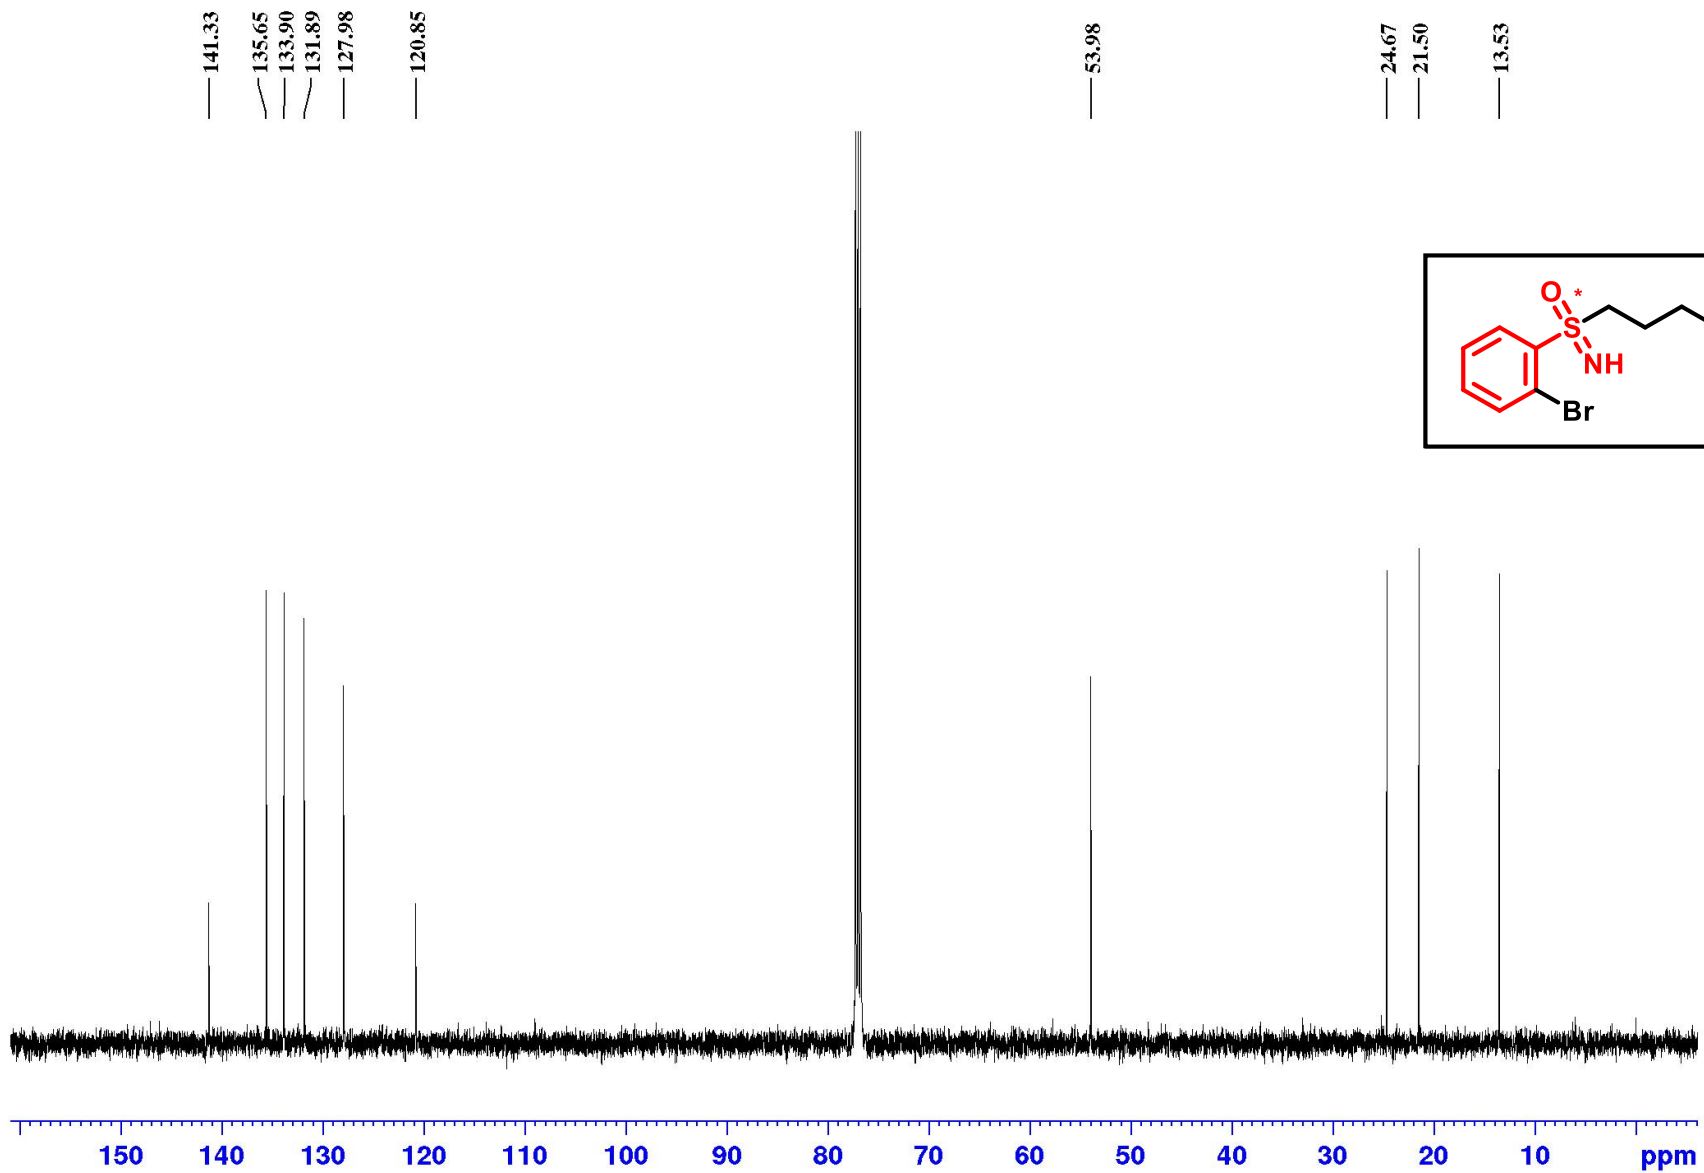

**Fig S-9:**  $^{13}\text{C}$  NMR Spectra of Compound **2d** (125 MHz,  $\text{CDCl}_3$ )

|               |                  |             |             |                 |              |                        |                     |
|---------------|------------------|-------------|-------------|-----------------|--------------|------------------------|---------------------|
| Sample Name   | 2d               | Position    | Vial 32     | Instrument Name | Instrument 1 | User Name              |                     |
| Inj Vol       | 1                | InjPosition |             | SampleType      | Sample       | IRM Calibration Status | Some Ions Missed    |
| Data Filename | HRMS22I02AUG31.d | ACQ Method  | ISOCRATIC.m | Comment         |              | Acquired Time          | 8/2/2022 1:21:58 PM |

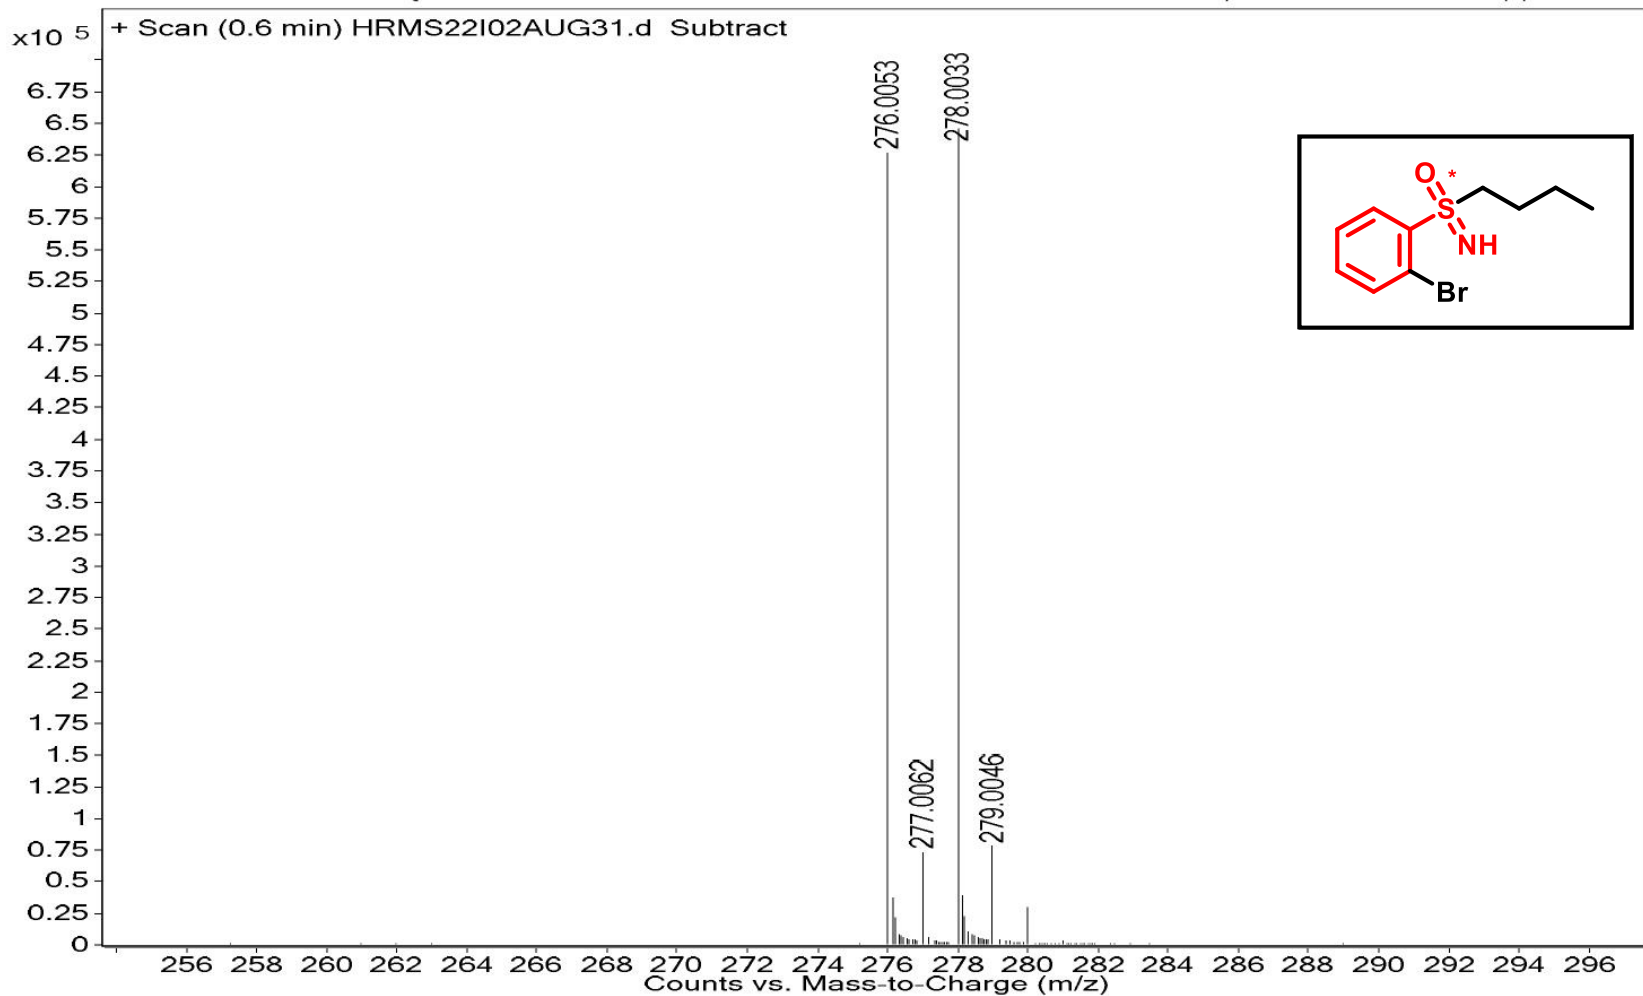

**Fig S-10:** HRMS report of Compound **2d**

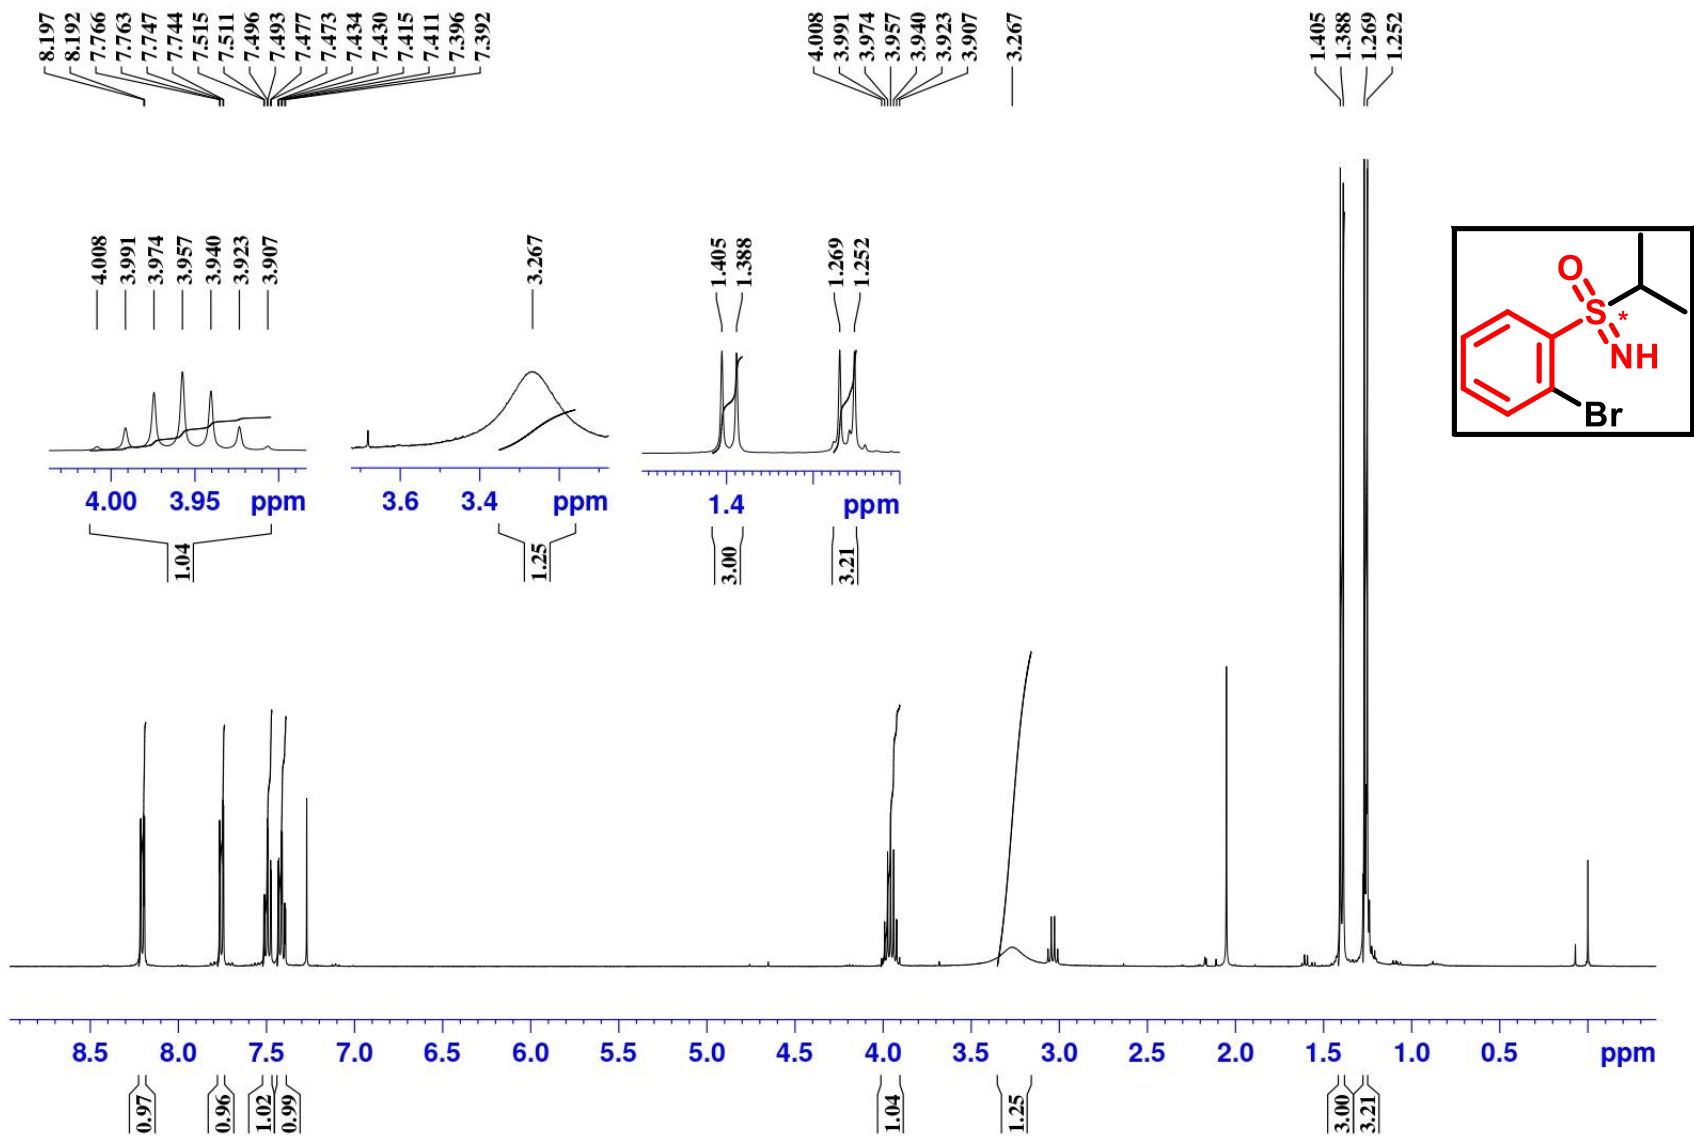

**Fig S-11:**  $^1\text{H}$  NMR Spectra of Compound 2e (400 MHz,  $\text{CDCl}_3$ )



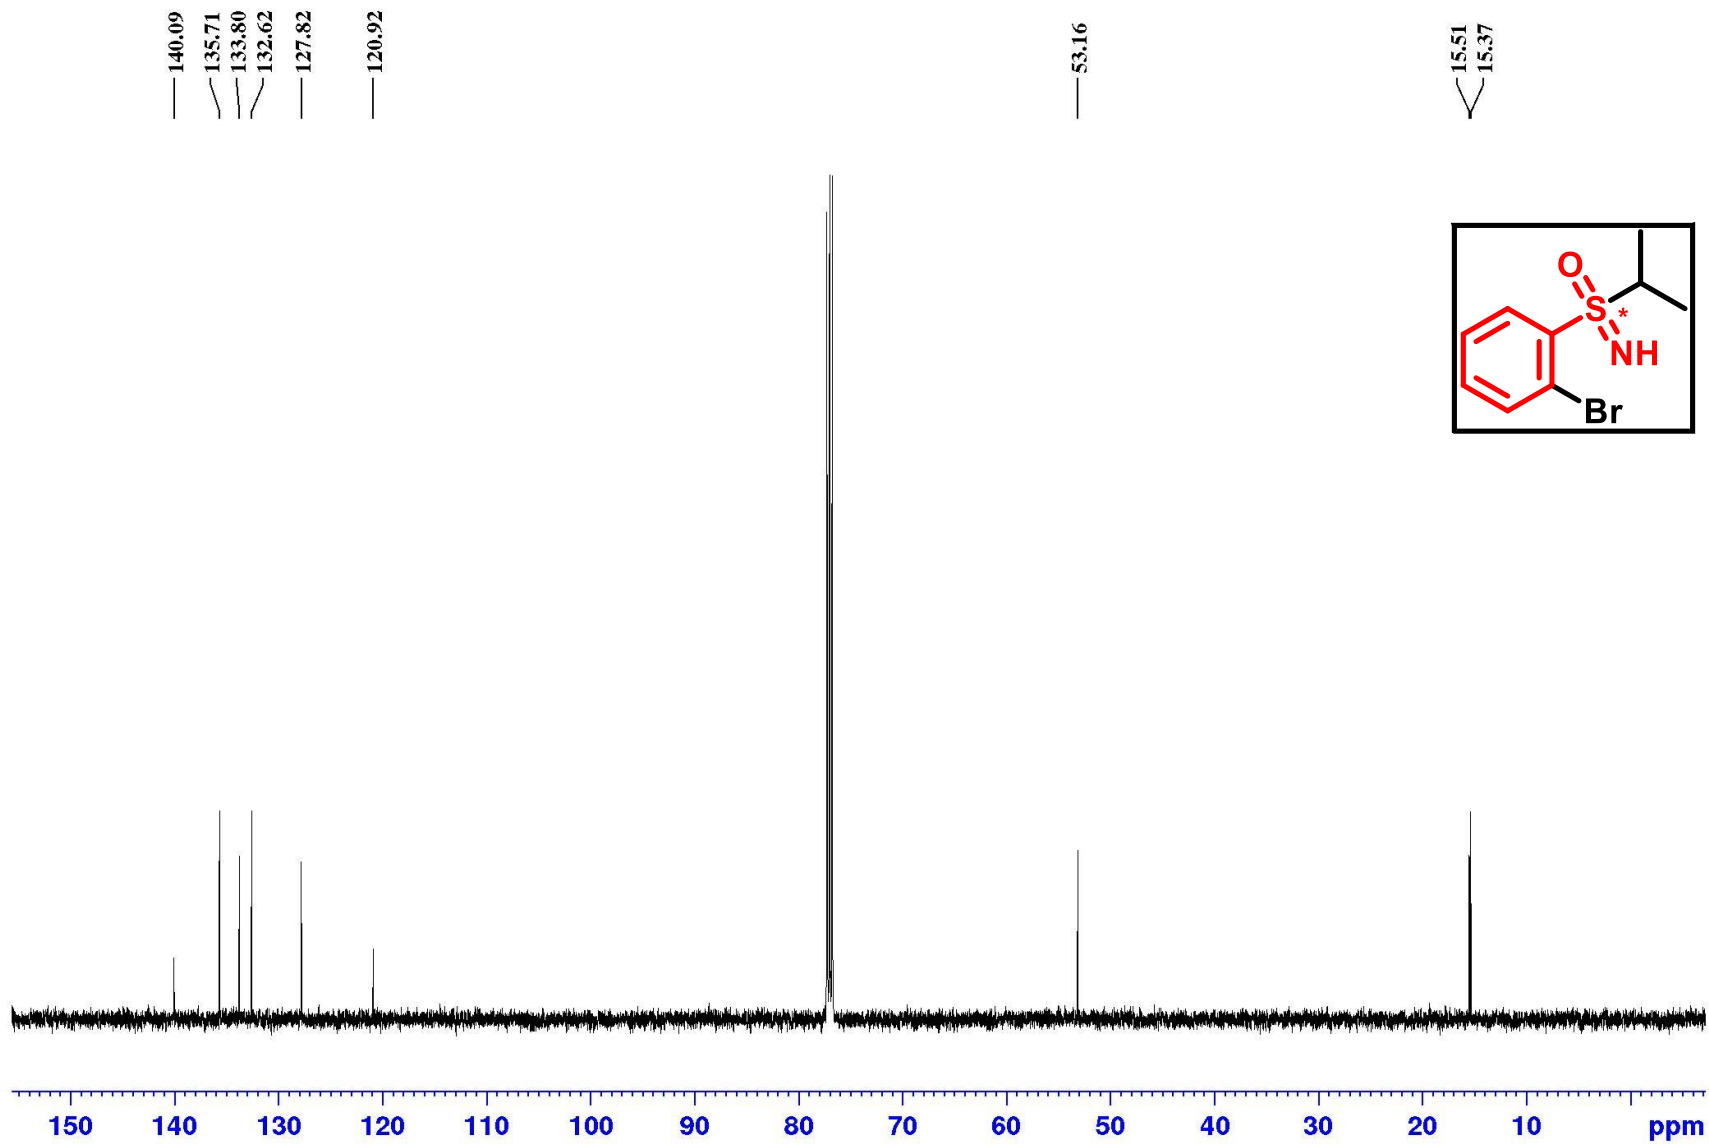

**Fig S-12:**  $^{13}\text{C}$  NMR Spectra of Compound **2e** (125 MHz,  $\text{CDCl}_3$ )

|               |                  |             |             |                 |              |                        |                     |
|---------------|------------------|-------------|-------------|-----------------|--------------|------------------------|---------------------|
| Sample Name   | 2e               | Position    | Vial 33     | Instrument Name | Instrument 1 | User Name              |                     |
| Inj Vol       | 1                | InjPosition |             | SampleType      | Sample       | IRM Calibration Status | Some Ions Missed    |
| Data Filename | HRMS22I02AUG32.d | ACQ Method  | ISOCRATIC.m | Comment         |              | Acquired Time          | 8/2/2022 1:25:03 PM |

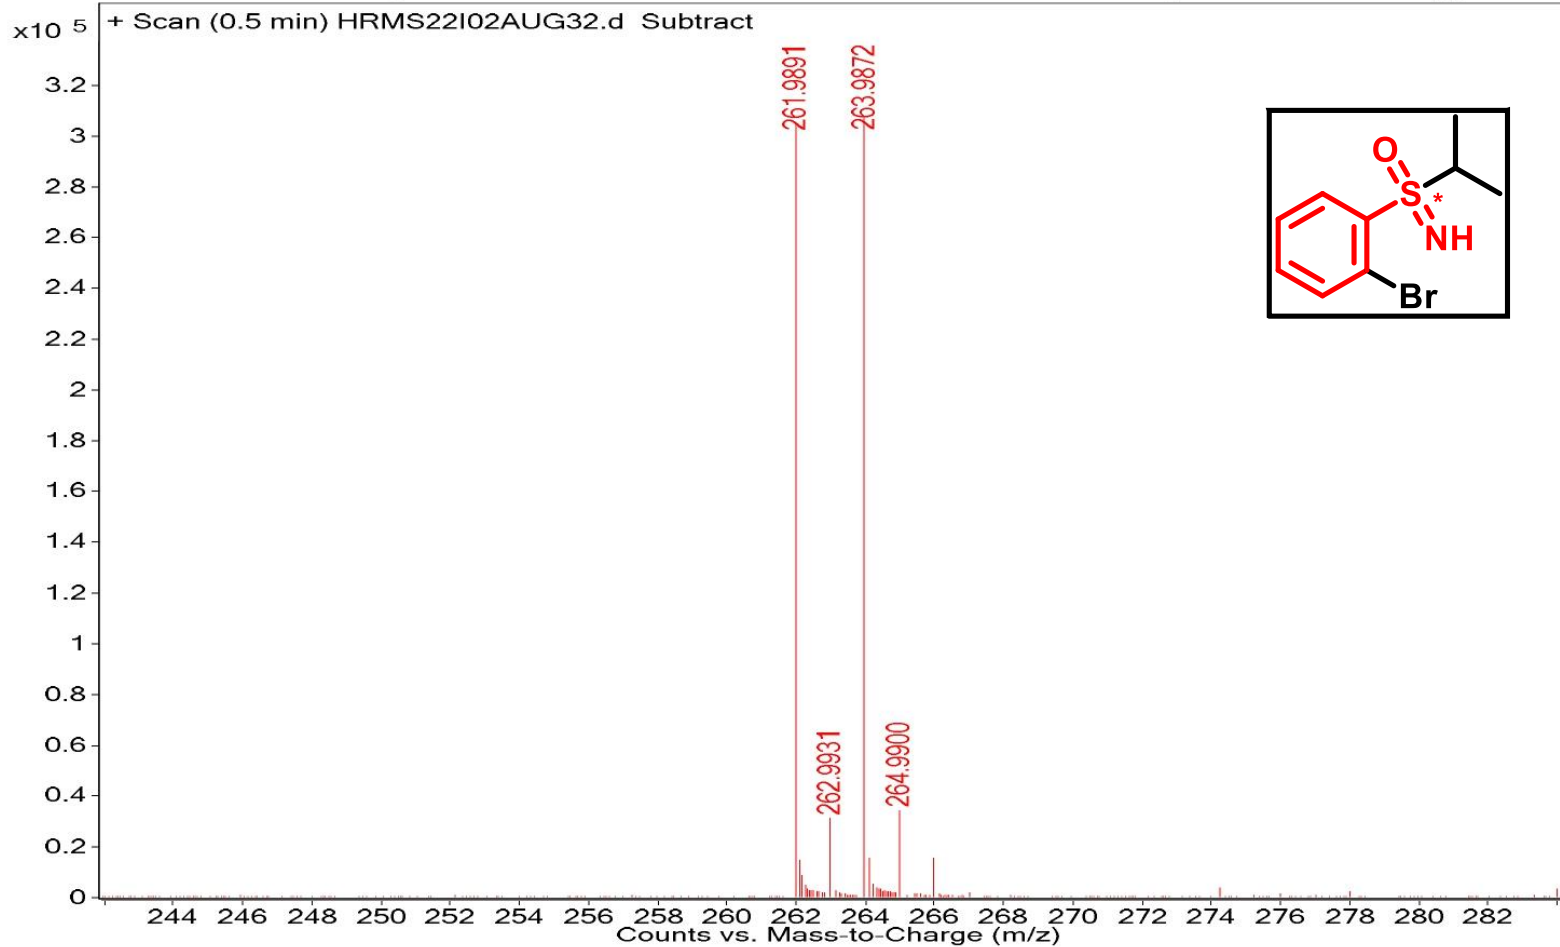

**Fig S-13:** HRMS report of Compound **2e**

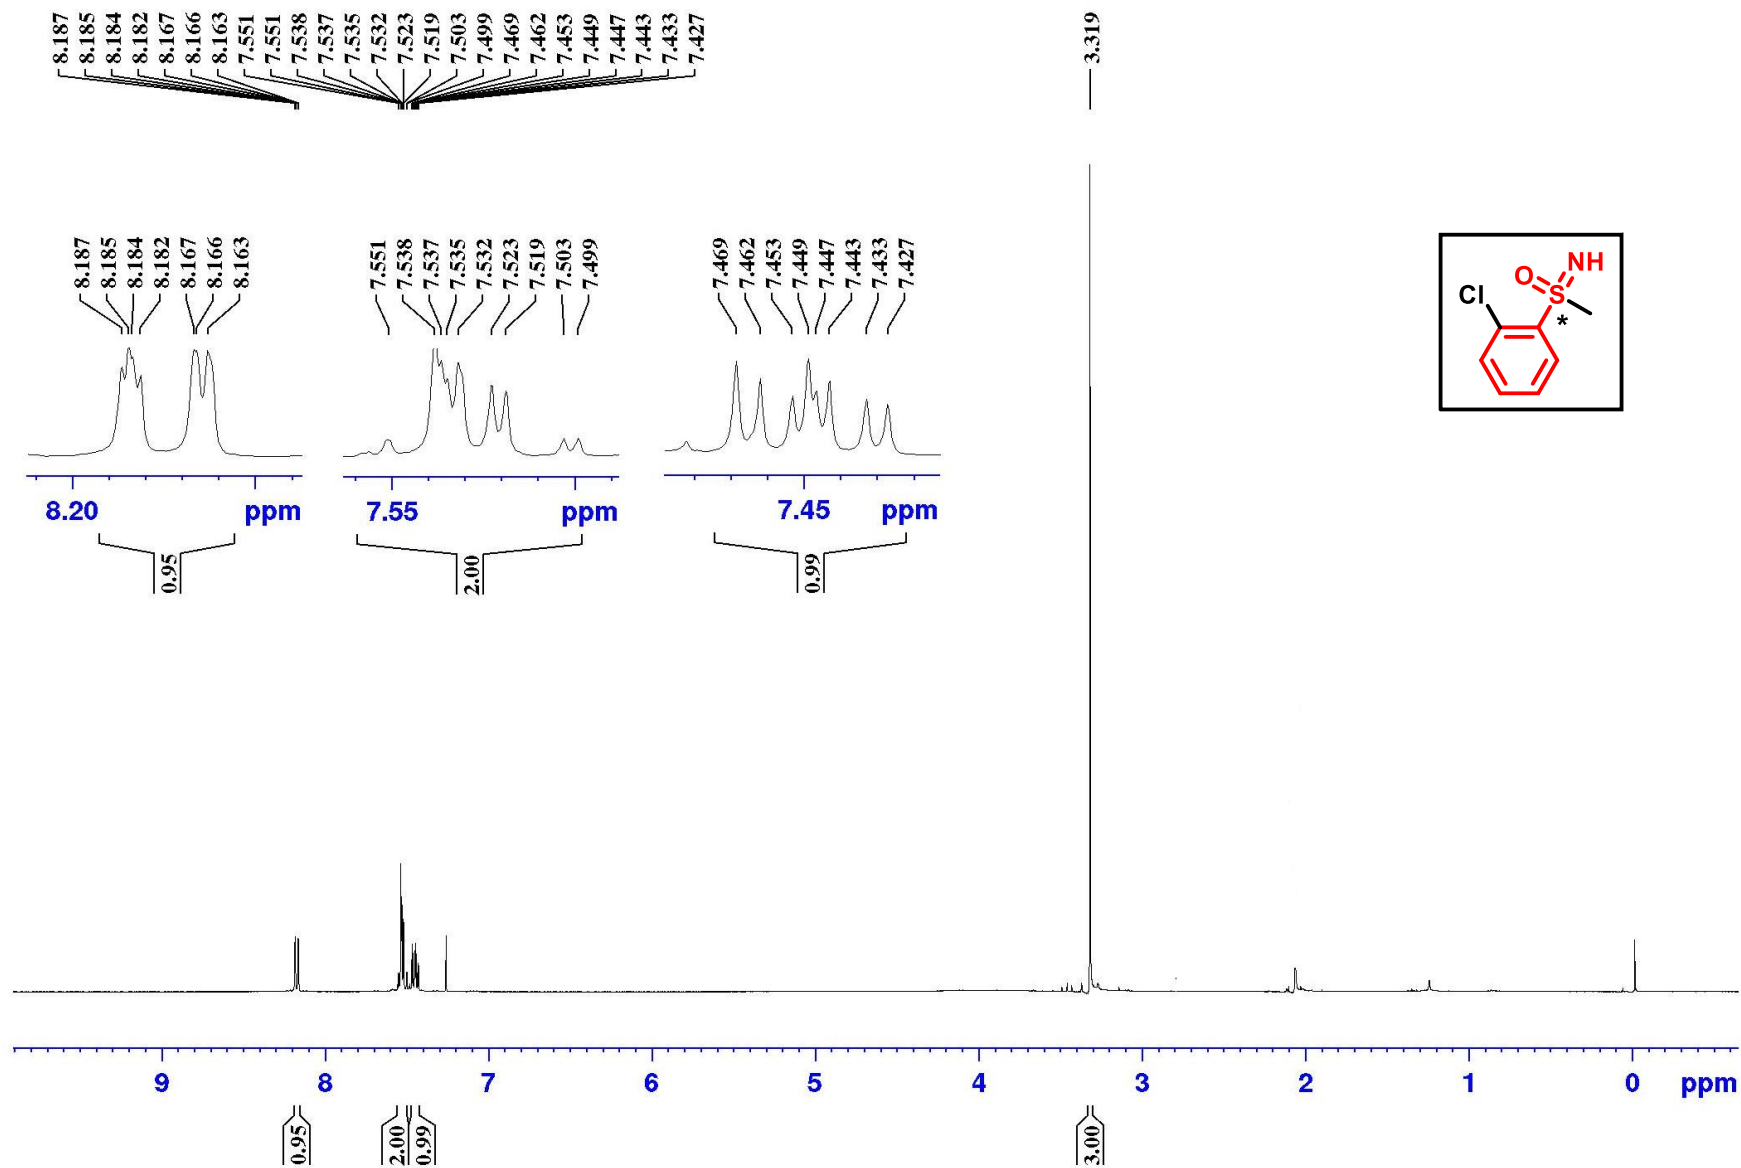

**Fig S-14:**  $^1\text{H}$  NMR Spectra of Compound 2f (400 MHz,  $\text{CDCl}_3$ )

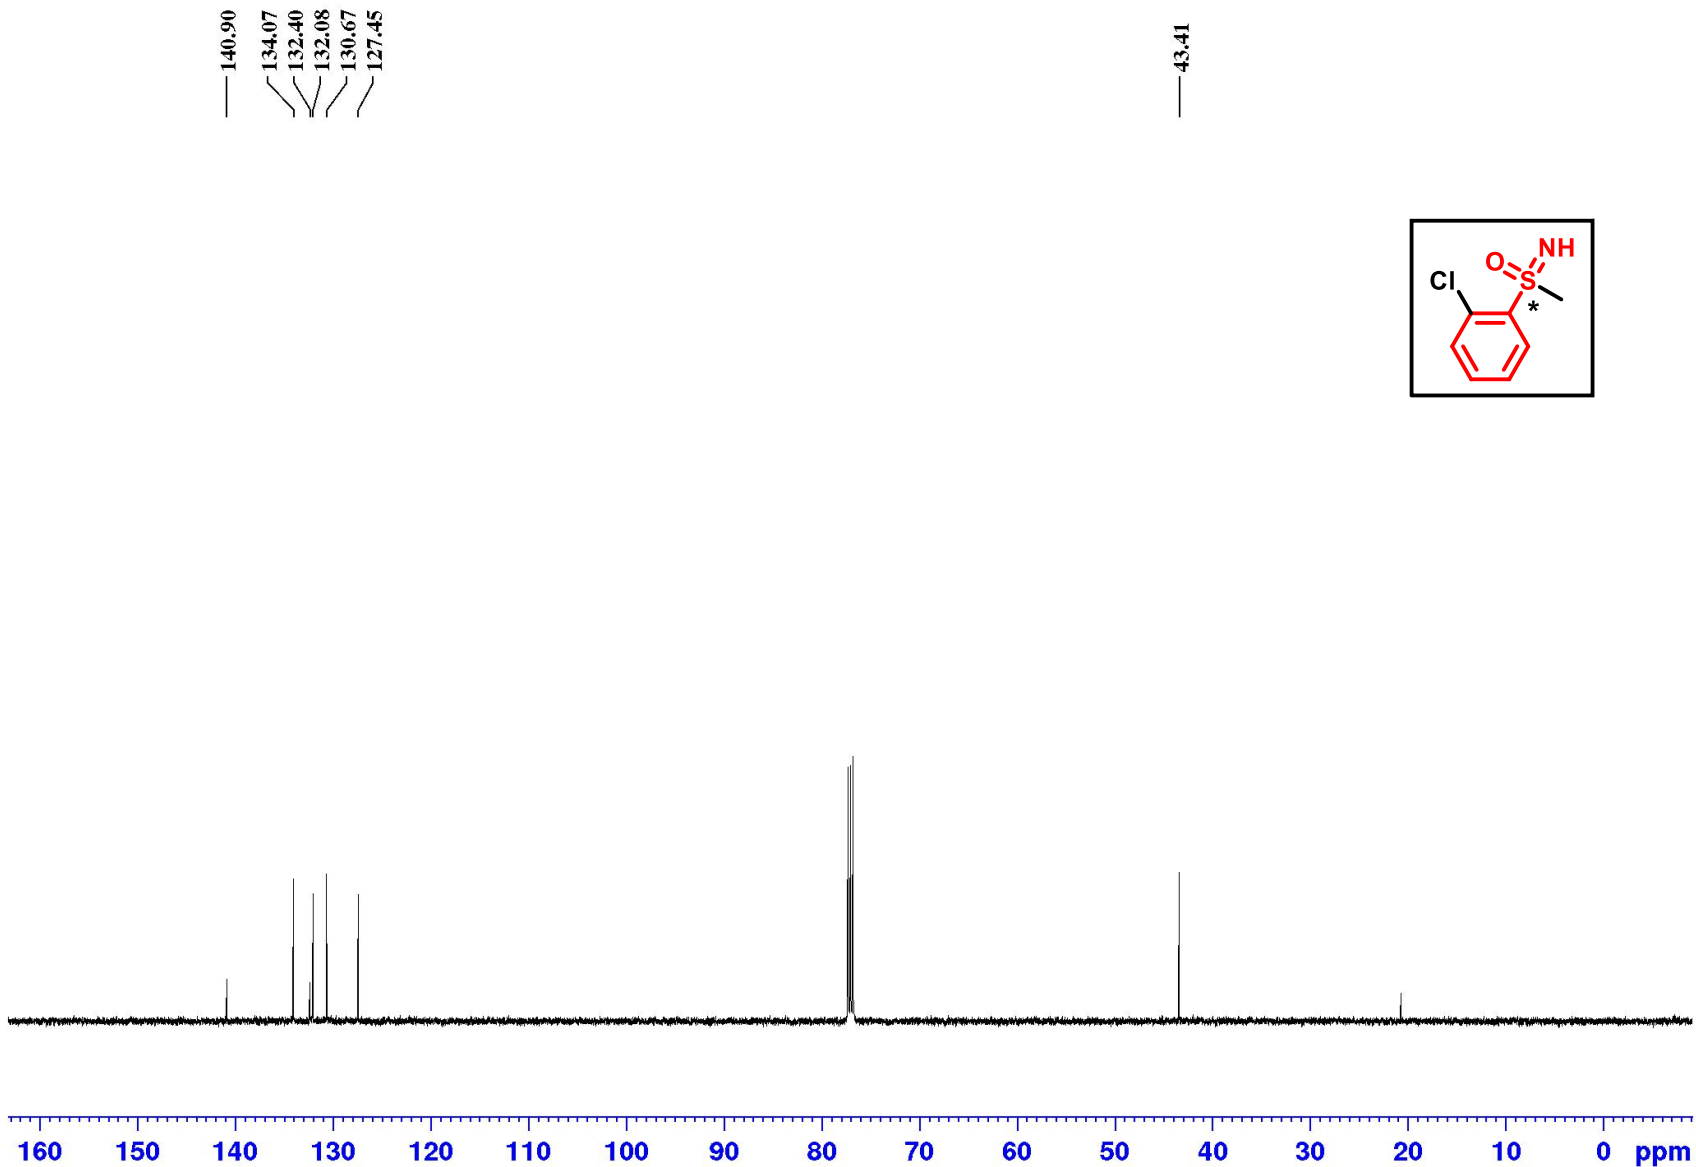

**Fig S-15:**  $^{13}\text{C}$  NMR Spectra of Compound **2f** (125 MHz,  $\text{CDCl}_3$ )

|               |                  |             |             |                 |              |                        |                     |
|---------------|------------------|-------------|-------------|-----------------|--------------|------------------------|---------------------|
| Sample Name   | 2f               | Position    | Vial 34     | Instrument Name | Instrument 1 | User Name              |                     |
| Inj Vol       | 1                | InjPosition |             | SampleType      | Sample       | IRM Calibration Status | Some Ions Missed    |
| Data Filename | HRMS22I02AUG33.d | ACQ Method  | ISOCRATIC.m | Comment         |              | Acquired Time          | 8/2/2022 1:28:06 PM |

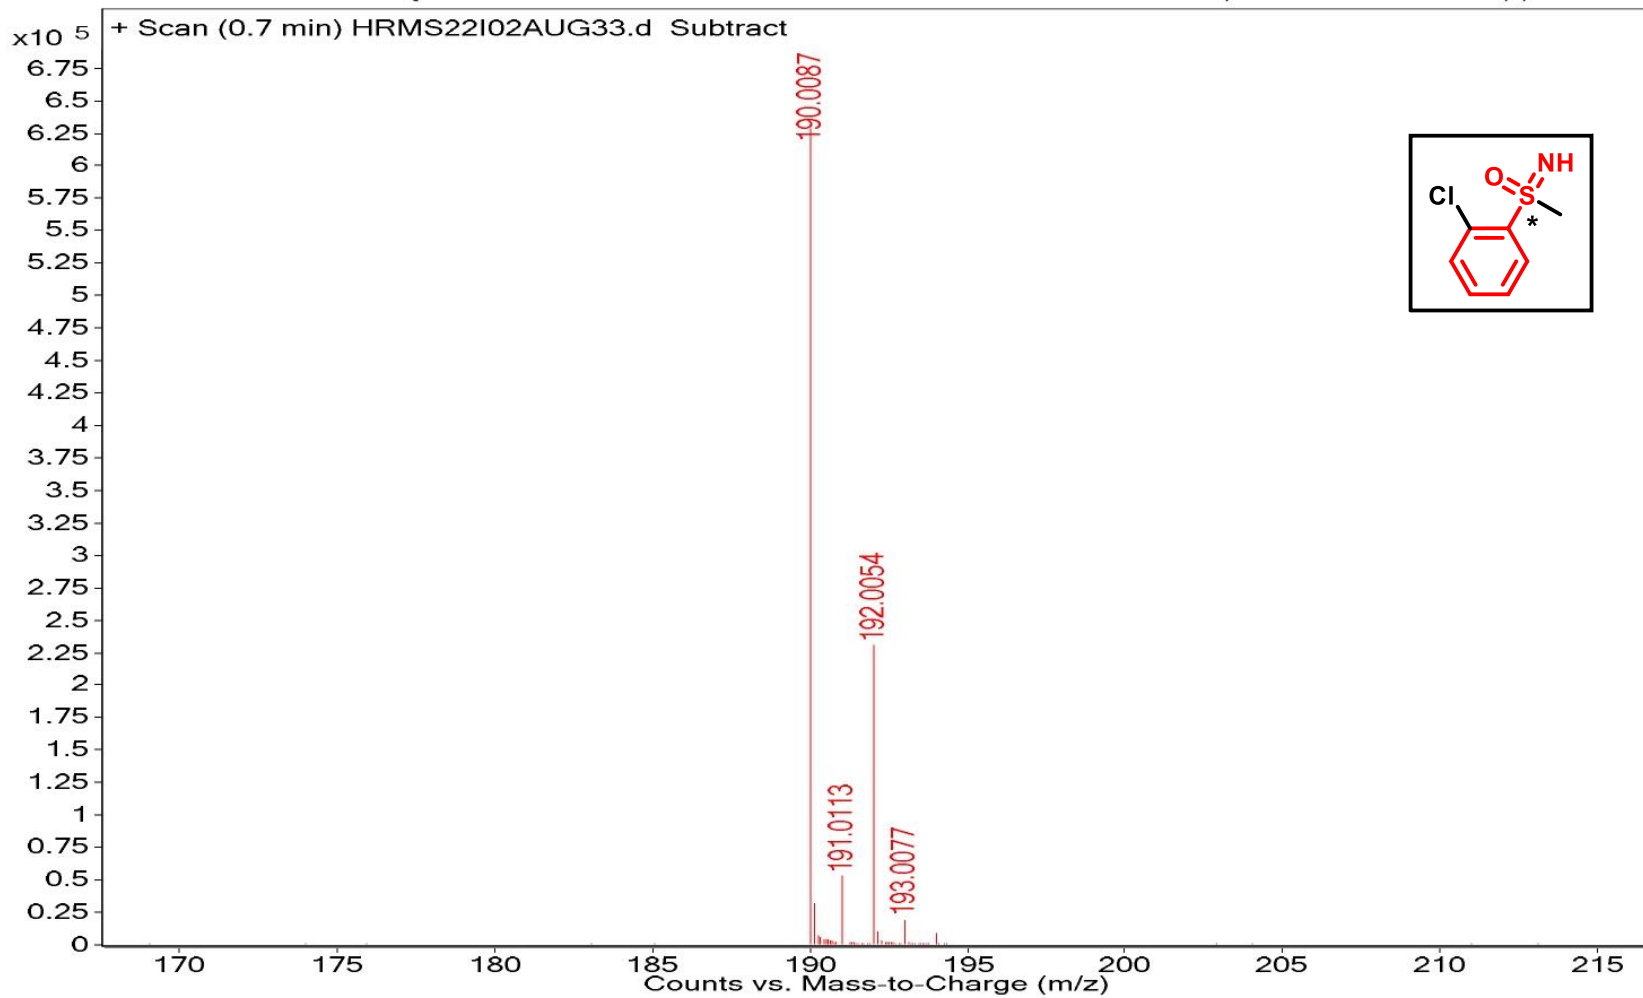

**Fig S-16:** HRMS report of Compound **2f**

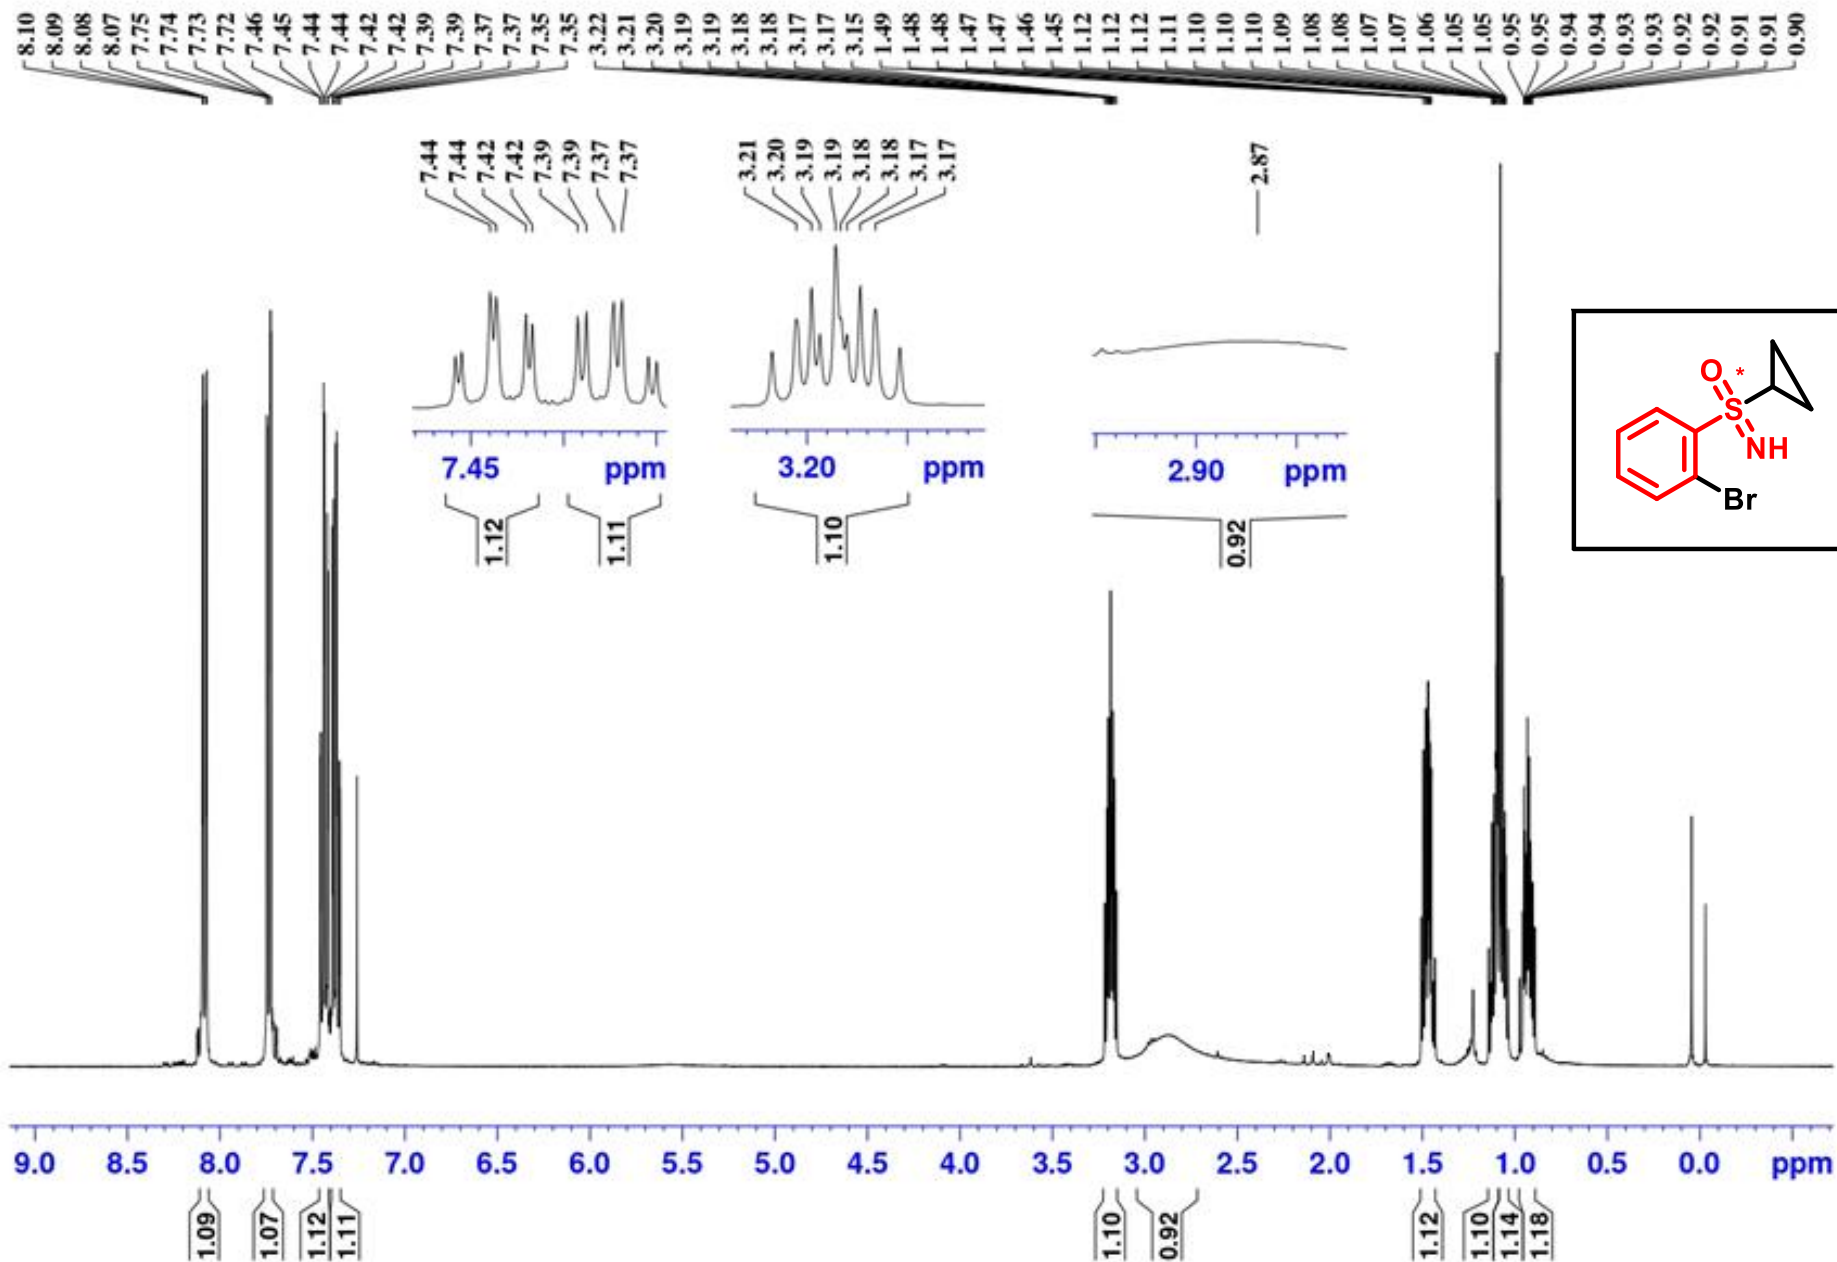

**Fig S-17:**  $^1\text{H}$  NMR Spectra of Compound **2g** (400 MHz,  $\text{CDCl}_3$ )

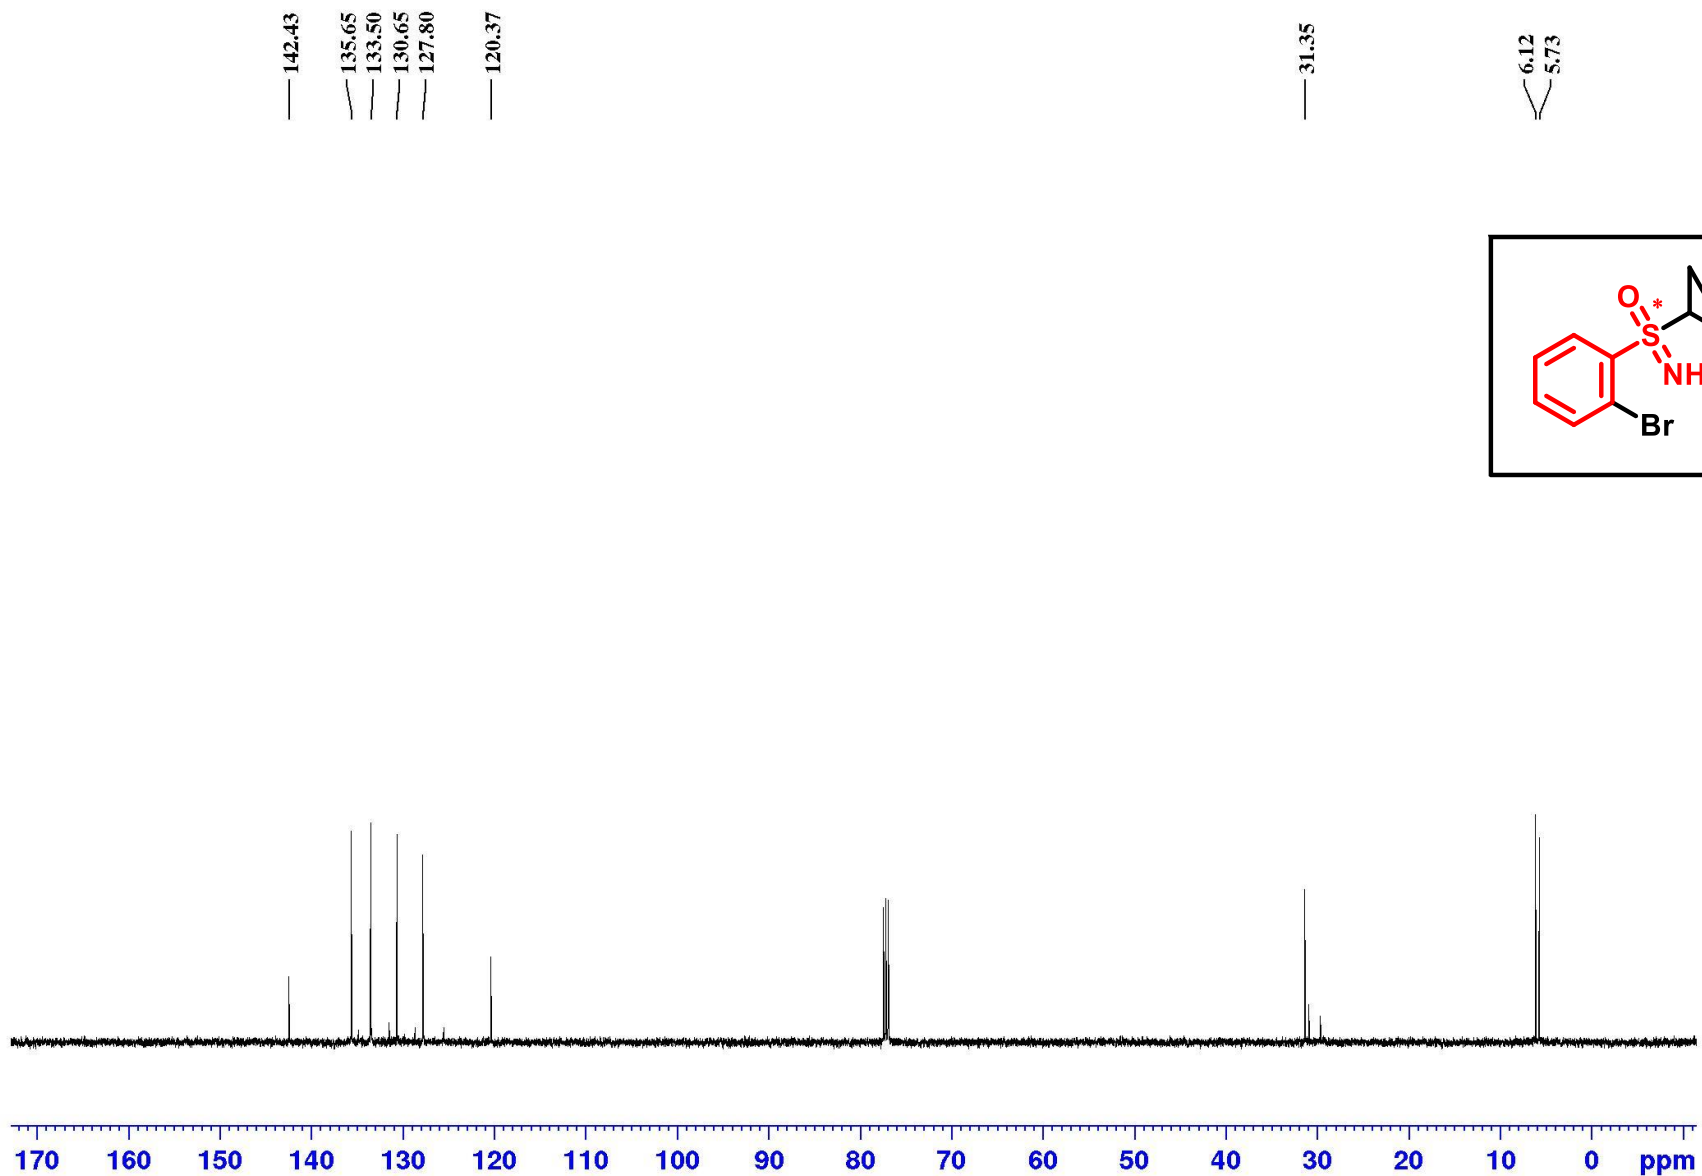

**Fig S-18:**  $^{13}\text{C}$  NMR Spectra of Compound 2g (125 MHz,  $\text{CDCl}_3$ )

|               |                  |             |             |                 |              |                        |                     |
|---------------|------------------|-------------|-------------|-----------------|--------------|------------------------|---------------------|
| Sample Name   | 2g               | Position    | Vial 35     | Instrument Name | Instrument 1 | User Name              |                     |
| Inj Vol       | 1                | InjPosition |             | SampleType      | Sample       | IRM Calibration Status | Some Ions Missed    |
| Data Filename | HRMS22I02AUG34.d | ACQ Method  | ISOCRATIC.m | Comment         |              | Acquired Time          | 8/2/2022 1:31:15 PM |

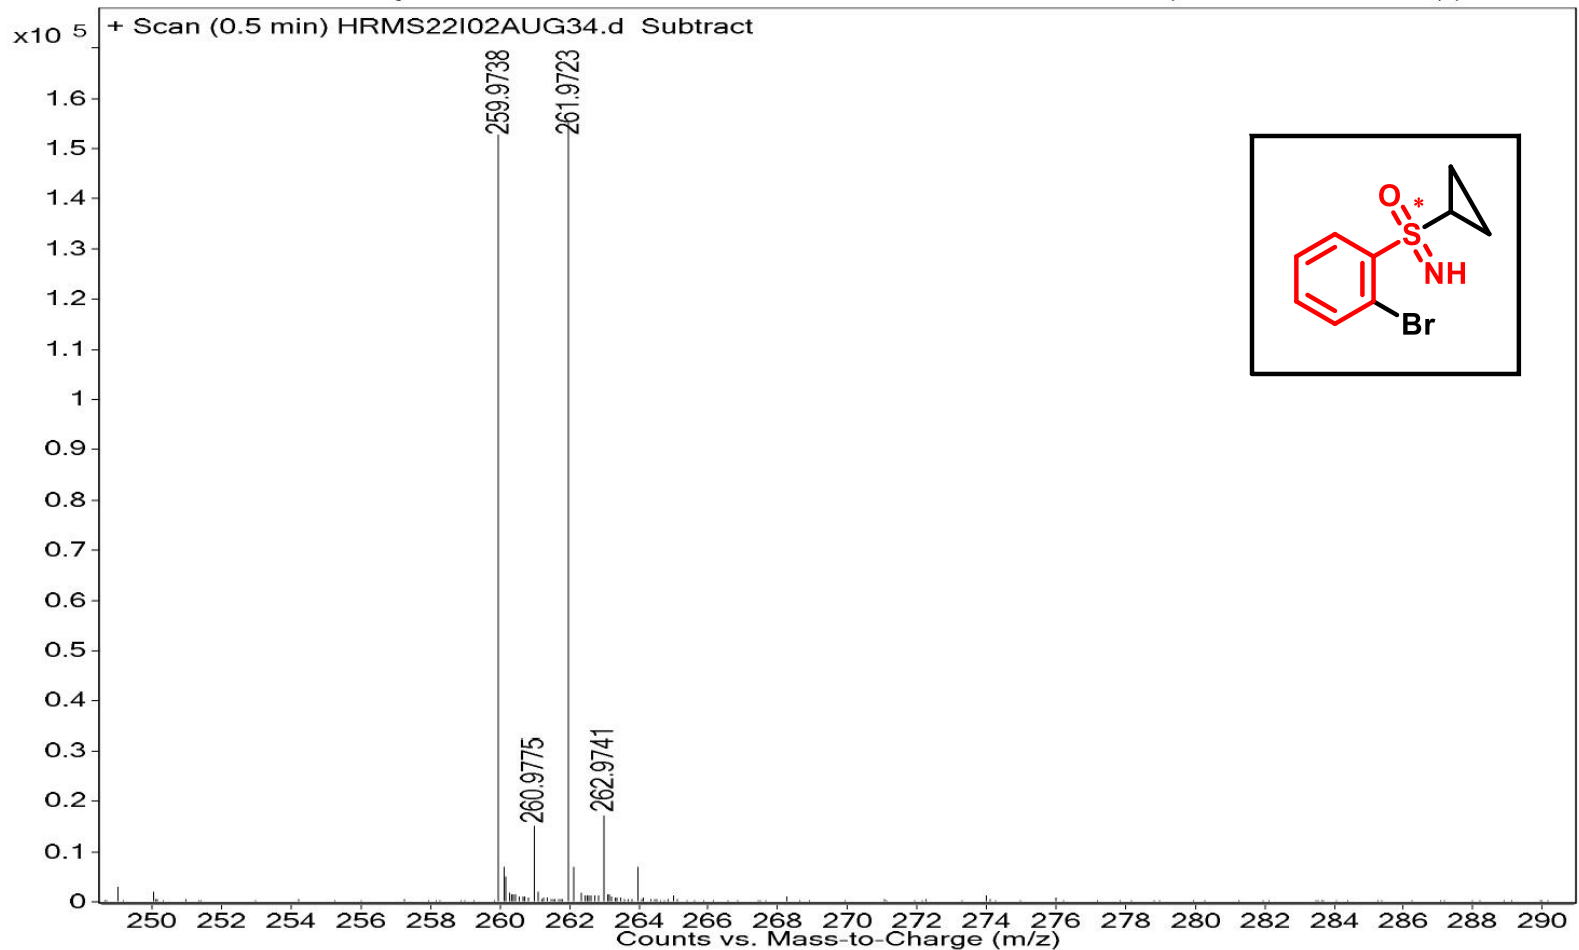

**Fig S-19:** HRMS report of Compound **2g**



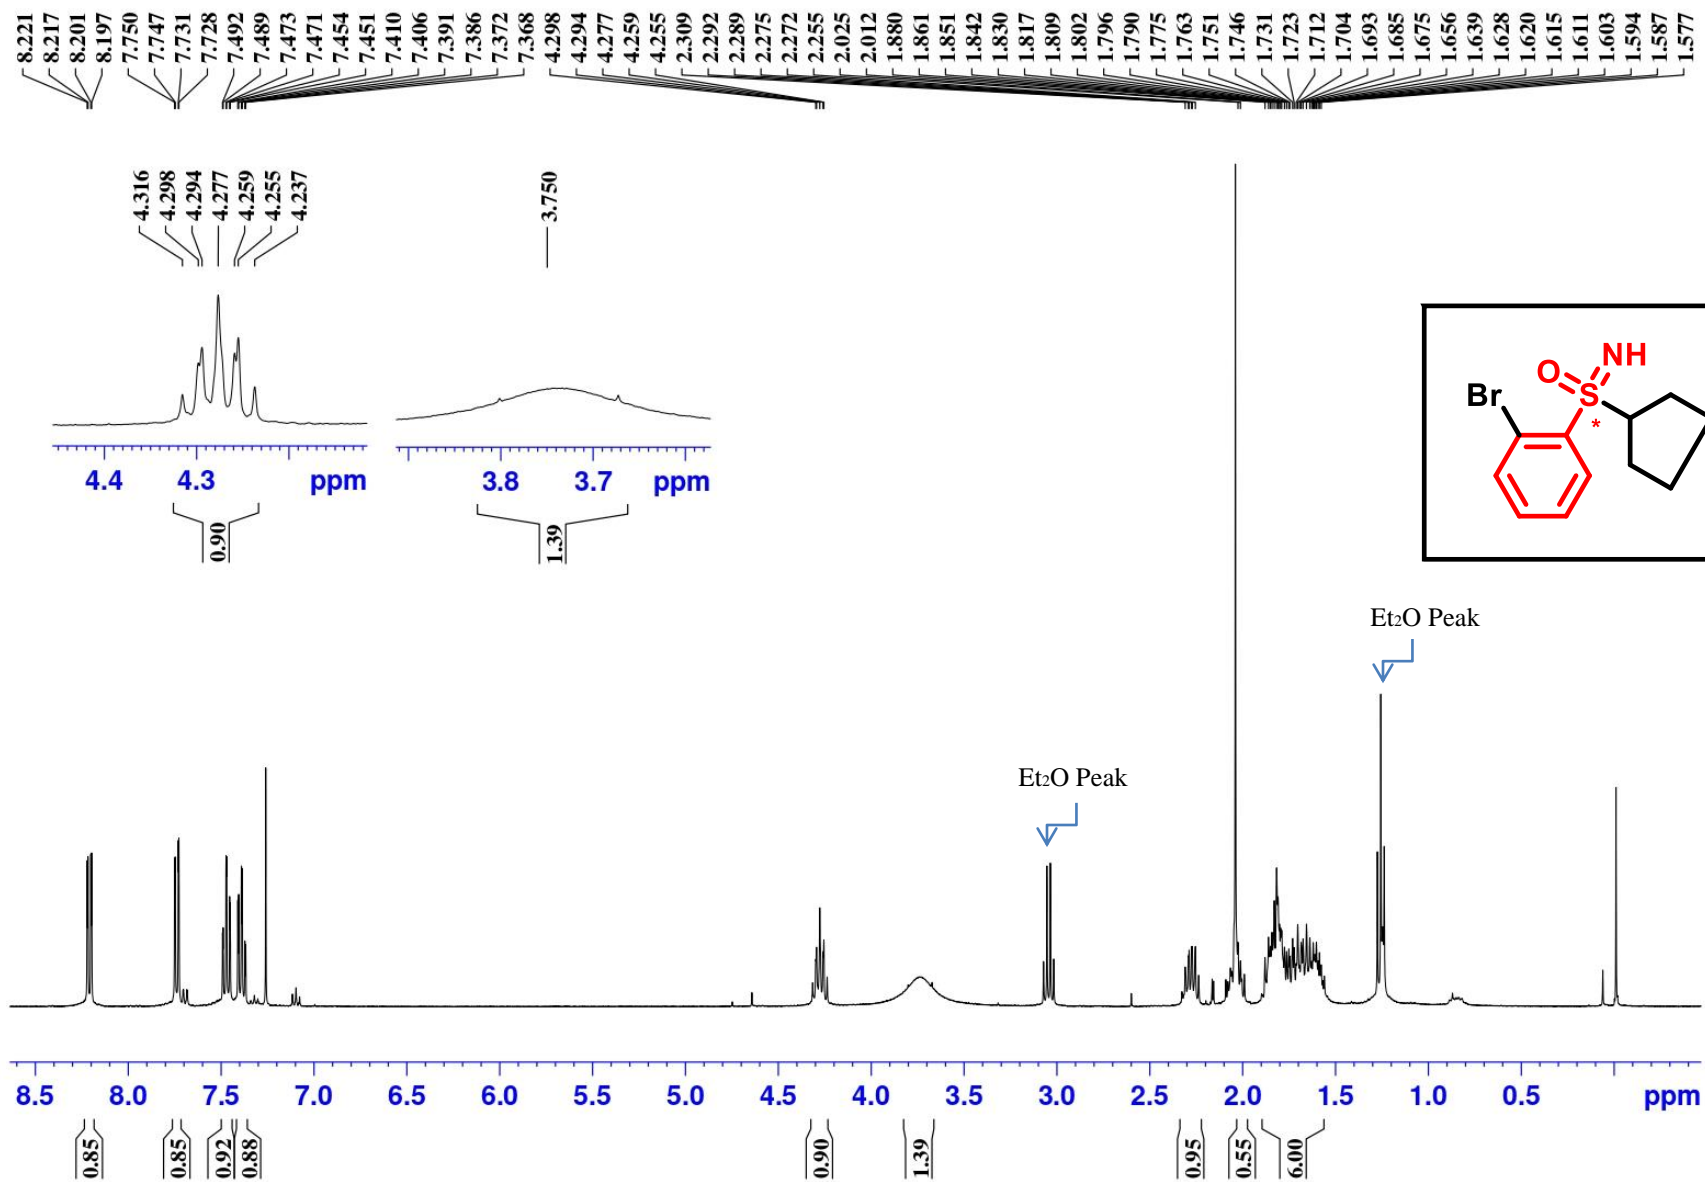

**Fig S-20:**  $^1\text{H}$  NMR Spectra of Compound **2h** (400 MHz,  $\text{CDCl}_3$ )

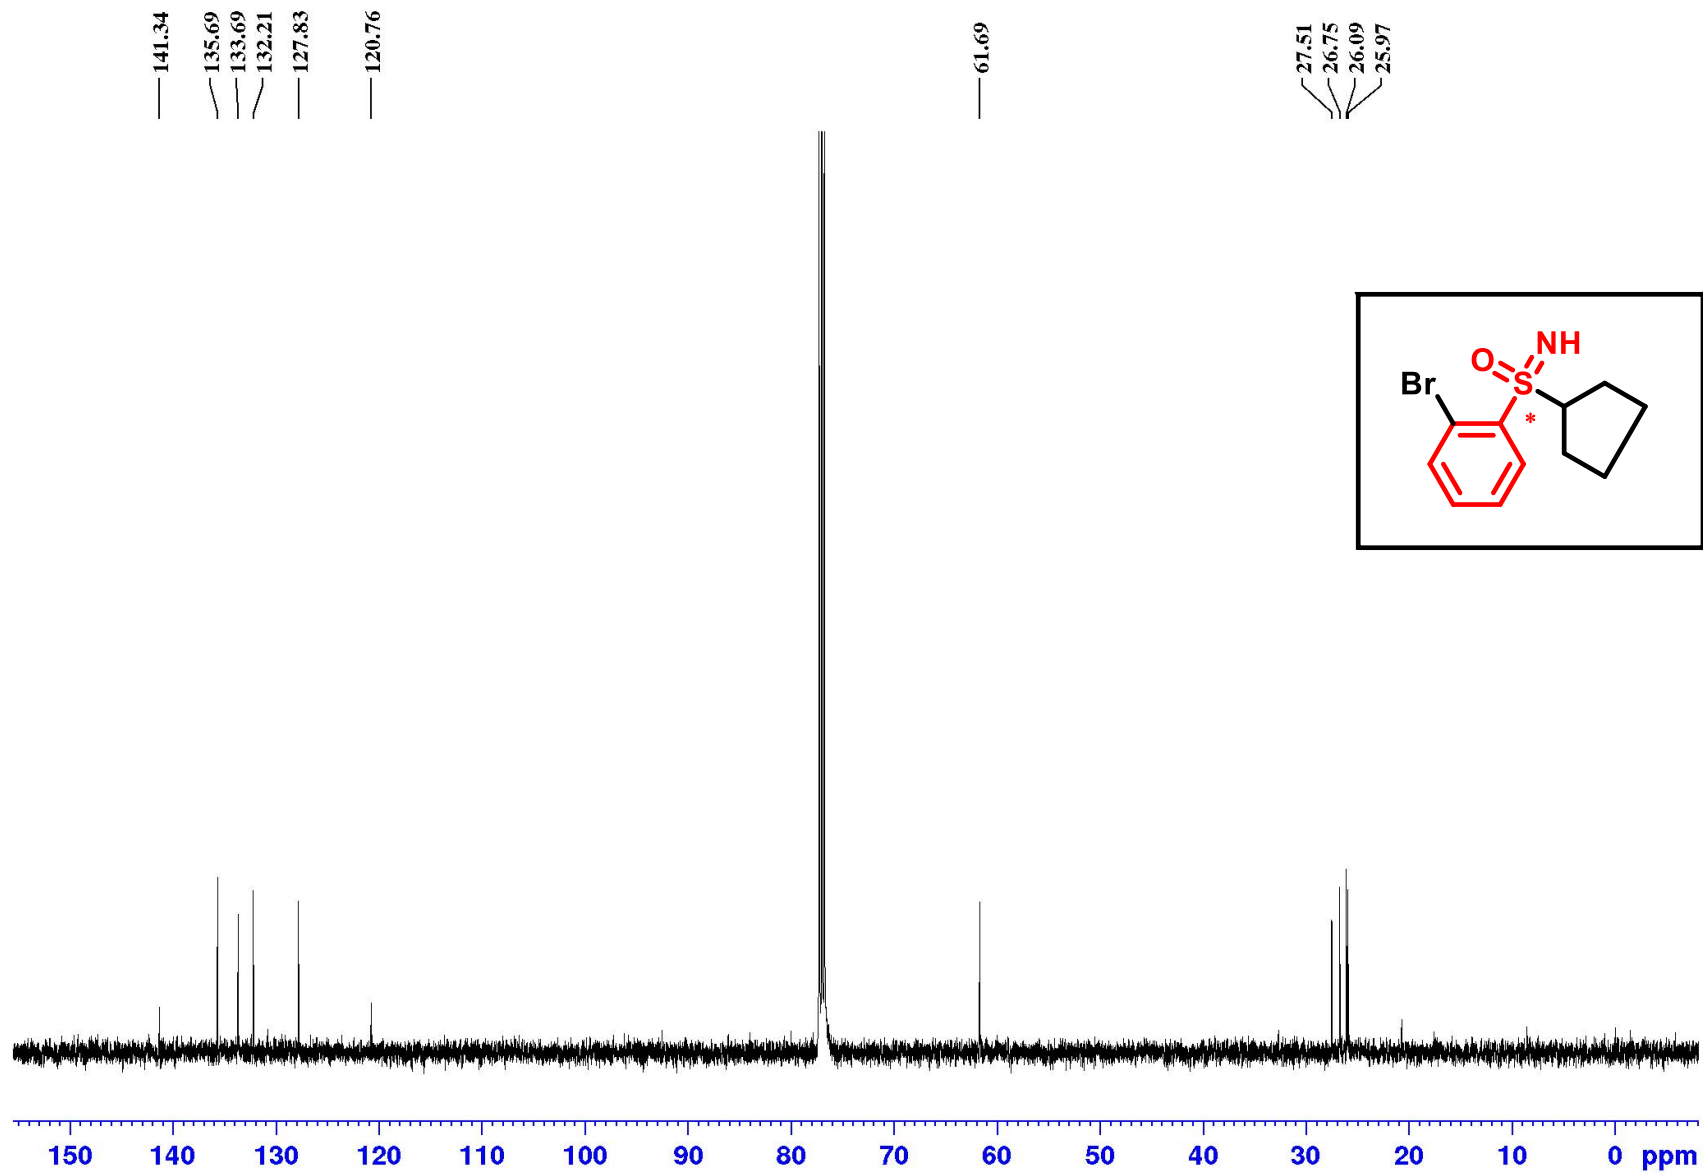

**Fig S-21:**  $^{13}\text{C}$  NMR Spectra of Compound 2h (125 MHz,  $\text{CDCl}_3$ )

|               |                  |             |             |                 |              |                        |                     |
|---------------|------------------|-------------|-------------|-----------------|--------------|------------------------|---------------------|
| Sample Name   | 2h               | Position    | Vial 31     | Instrument Name | Instrument 1 | User Name              |                     |
| Inj Vol       | 1                | InjPosition |             | SampleType      | Sample       | IRM Calibration Status | Some Ions Missed    |
| Data Filename | HRMS22I03AUG31.d | ACQ Method  | ISOCRATIC.m | Comment         |              | Acquired Time          | 8/3/2022 1:09:42 PM |

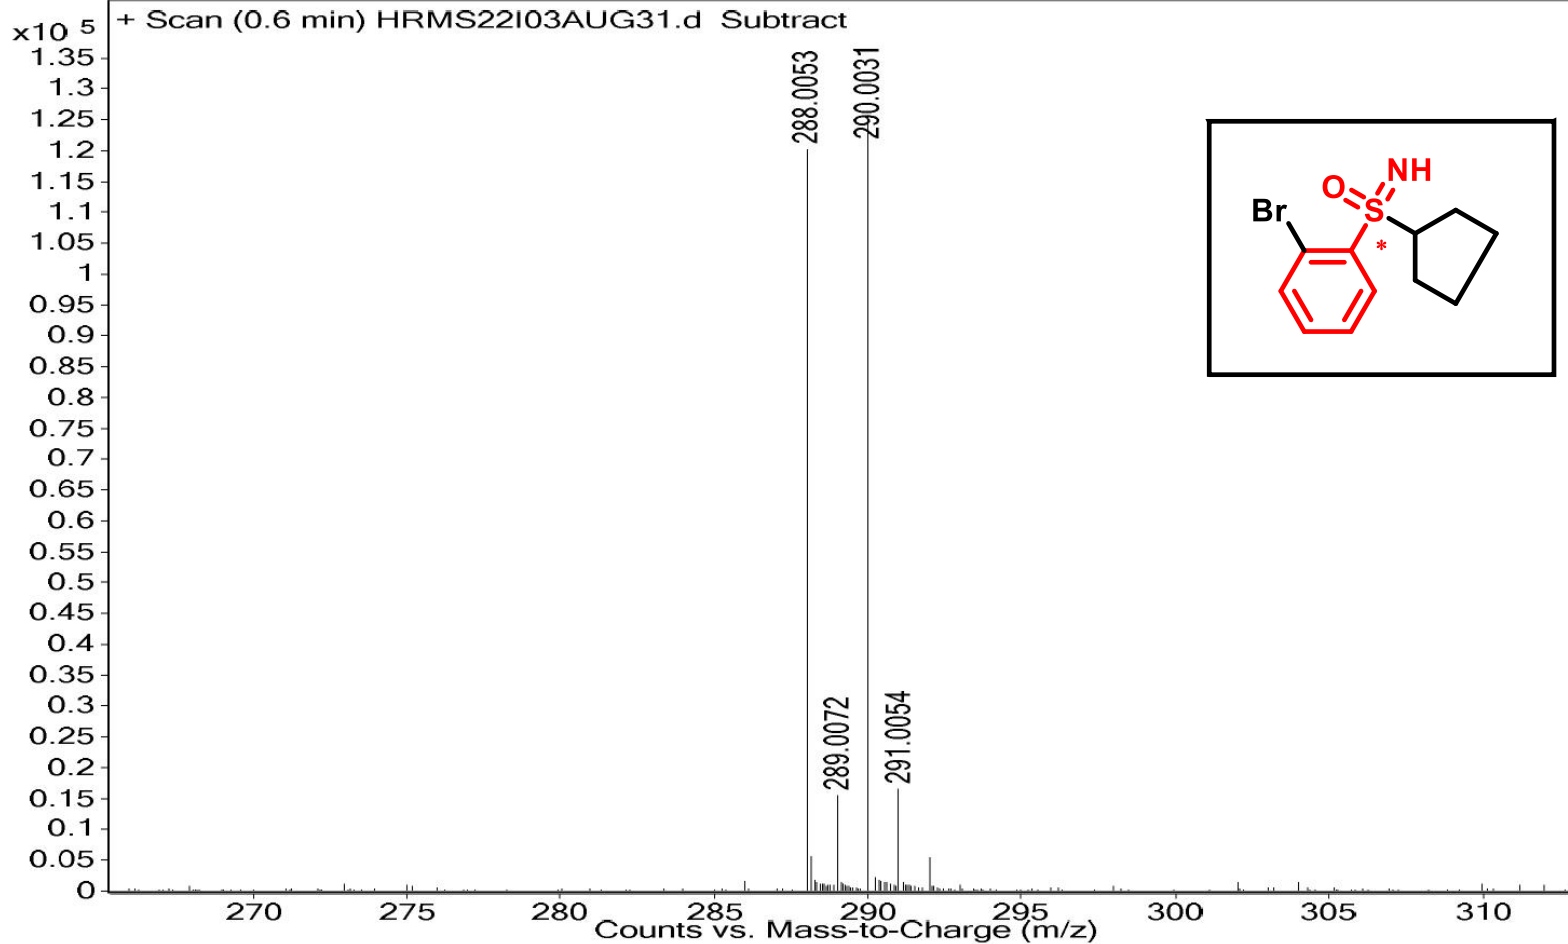

**Fig S-22:** HRMS report of Compound **2h**

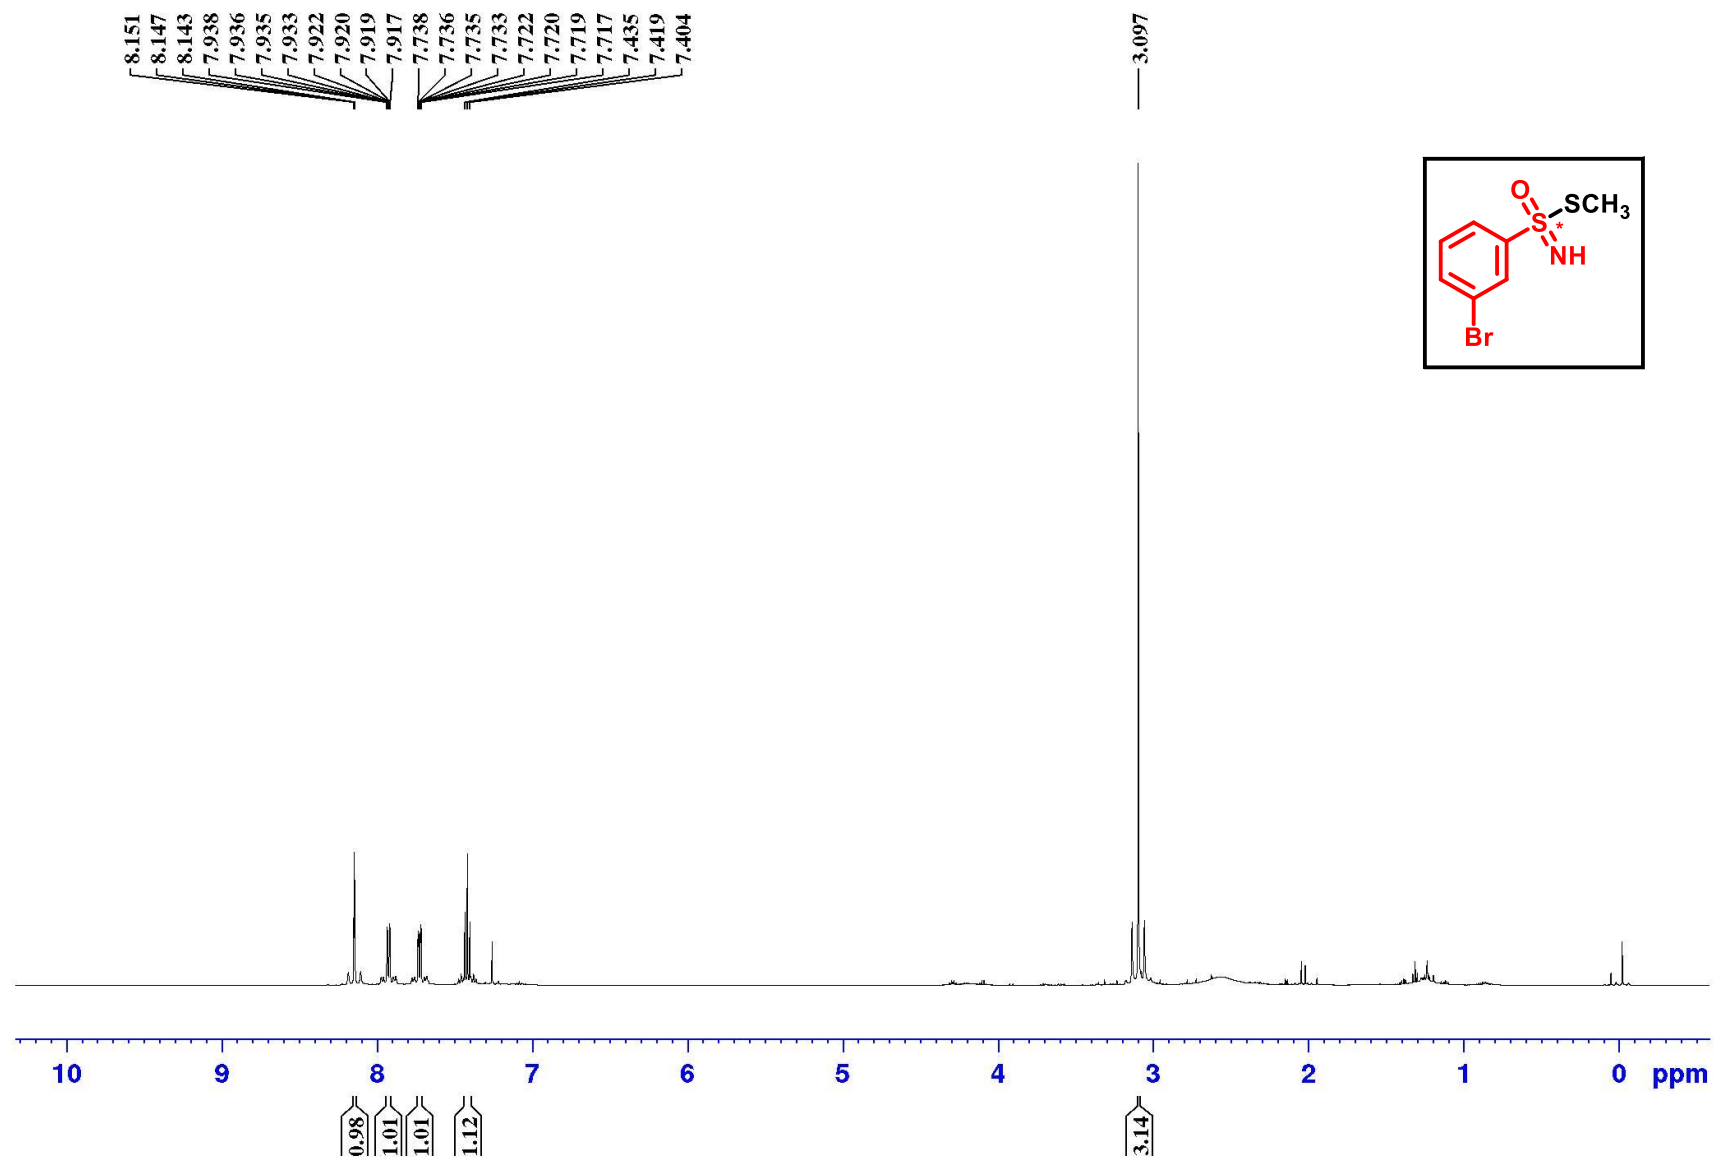

**Fig S-23:** <sup>1</sup>H NMR Spectra of Compound **2i** (500 MHz, CDCl<sub>3</sub>)

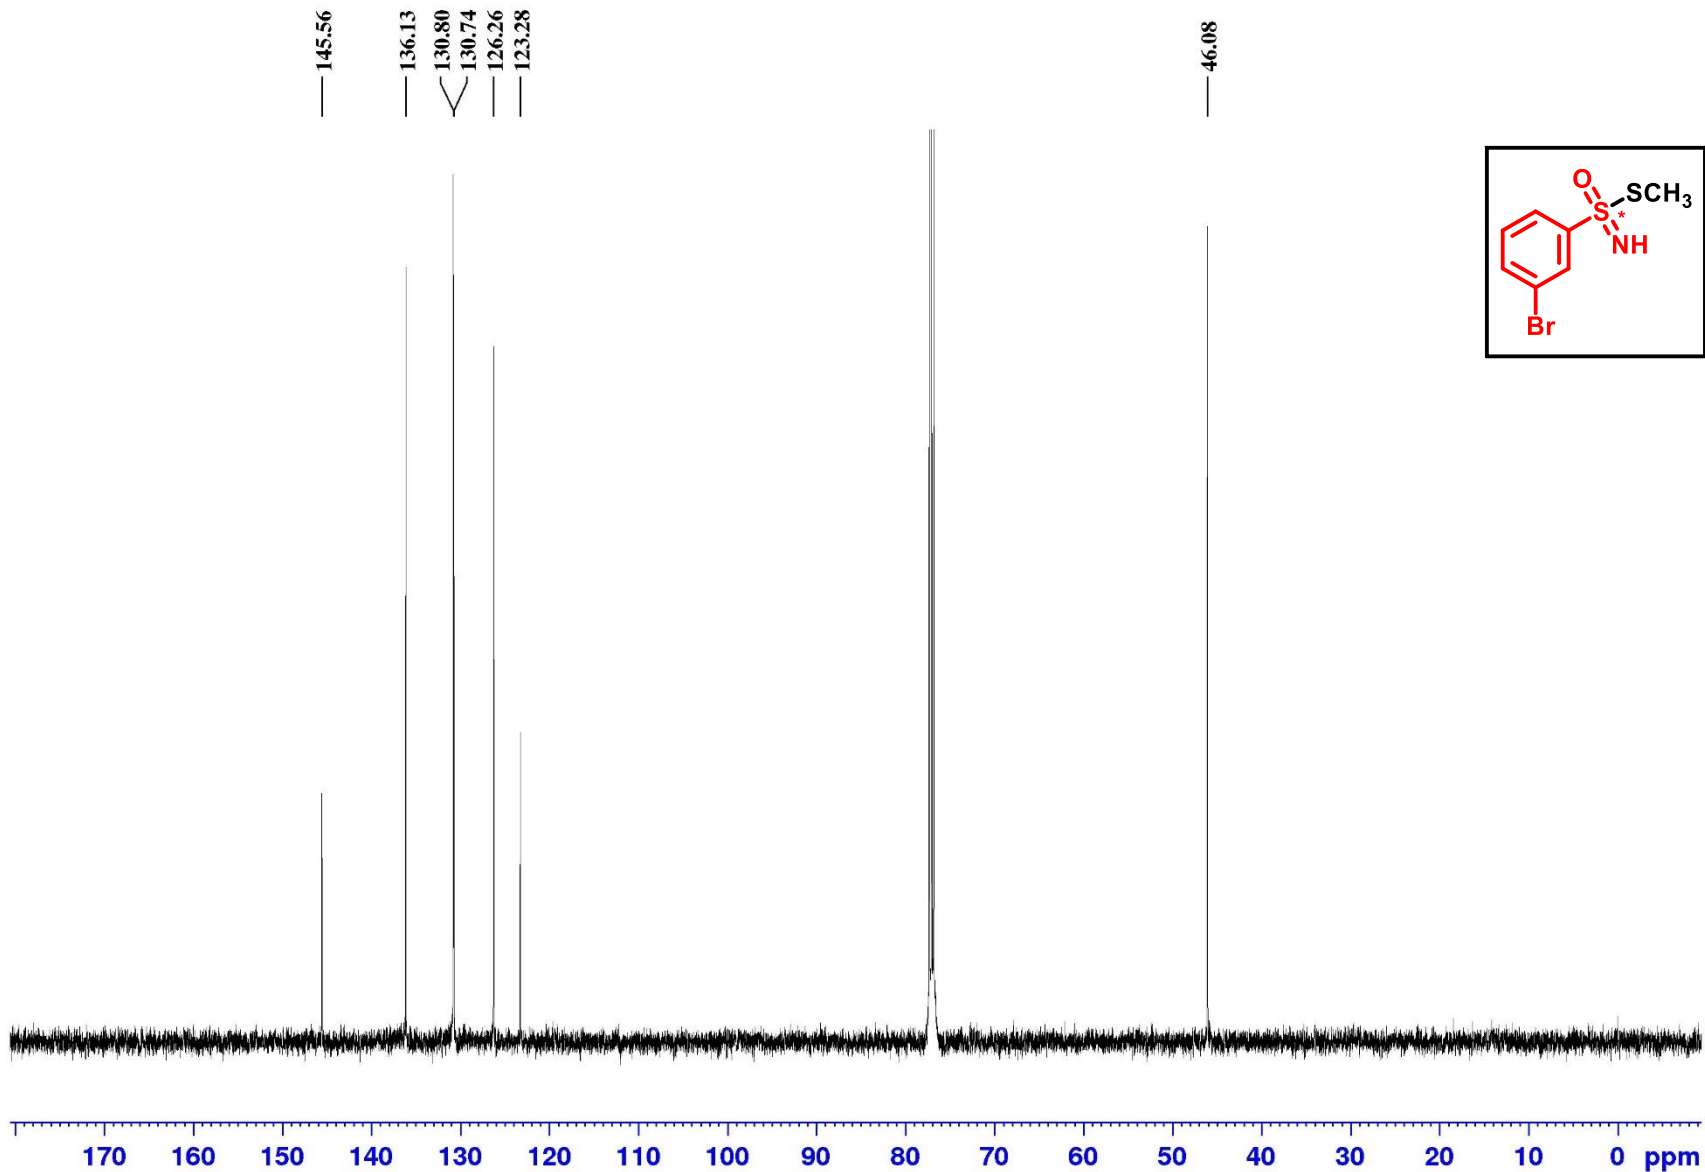

**Fig S-24:**  $^{13}\text{C}$  NMR Spectra of Compound **2i** (125 MHz,  $\text{CDCl}_3$ )

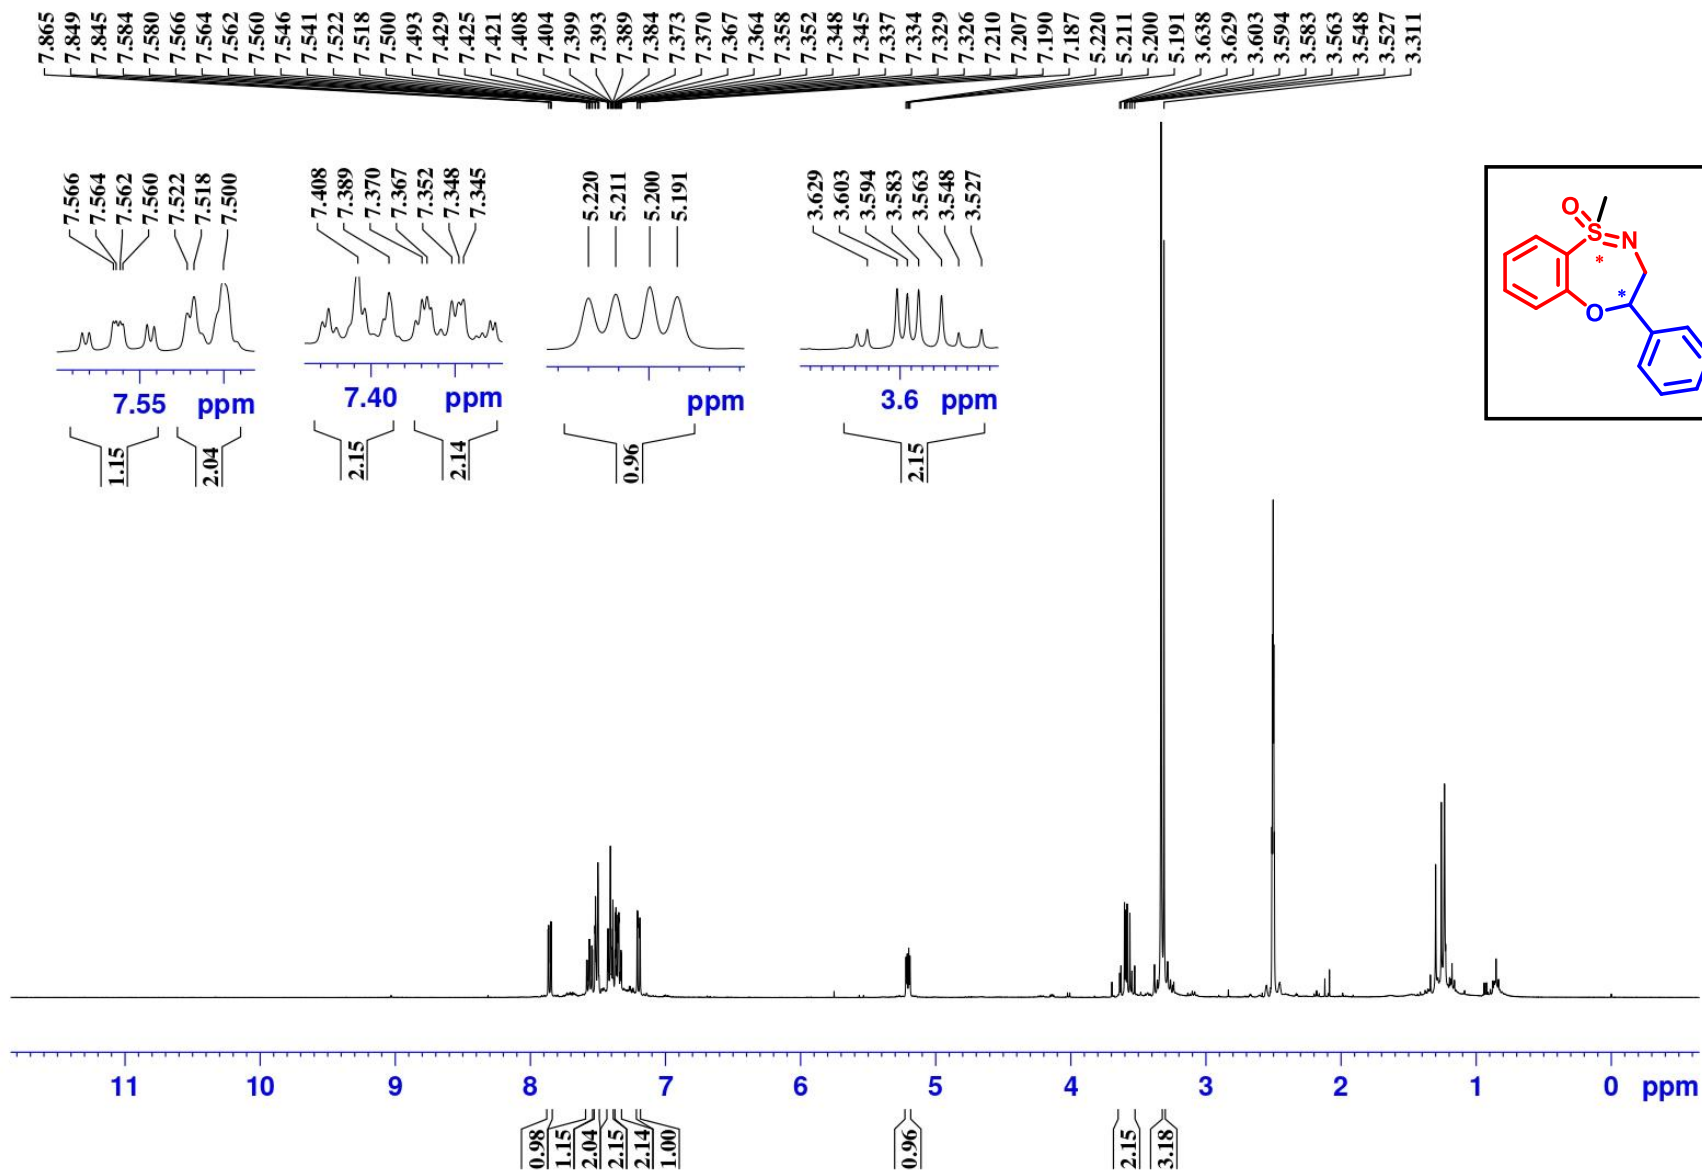

**Fig S-25:**  $^1\text{H}$  NMR Spectra of Compound 4a (400 MHz,  $\text{DMSO-d}_6$ )

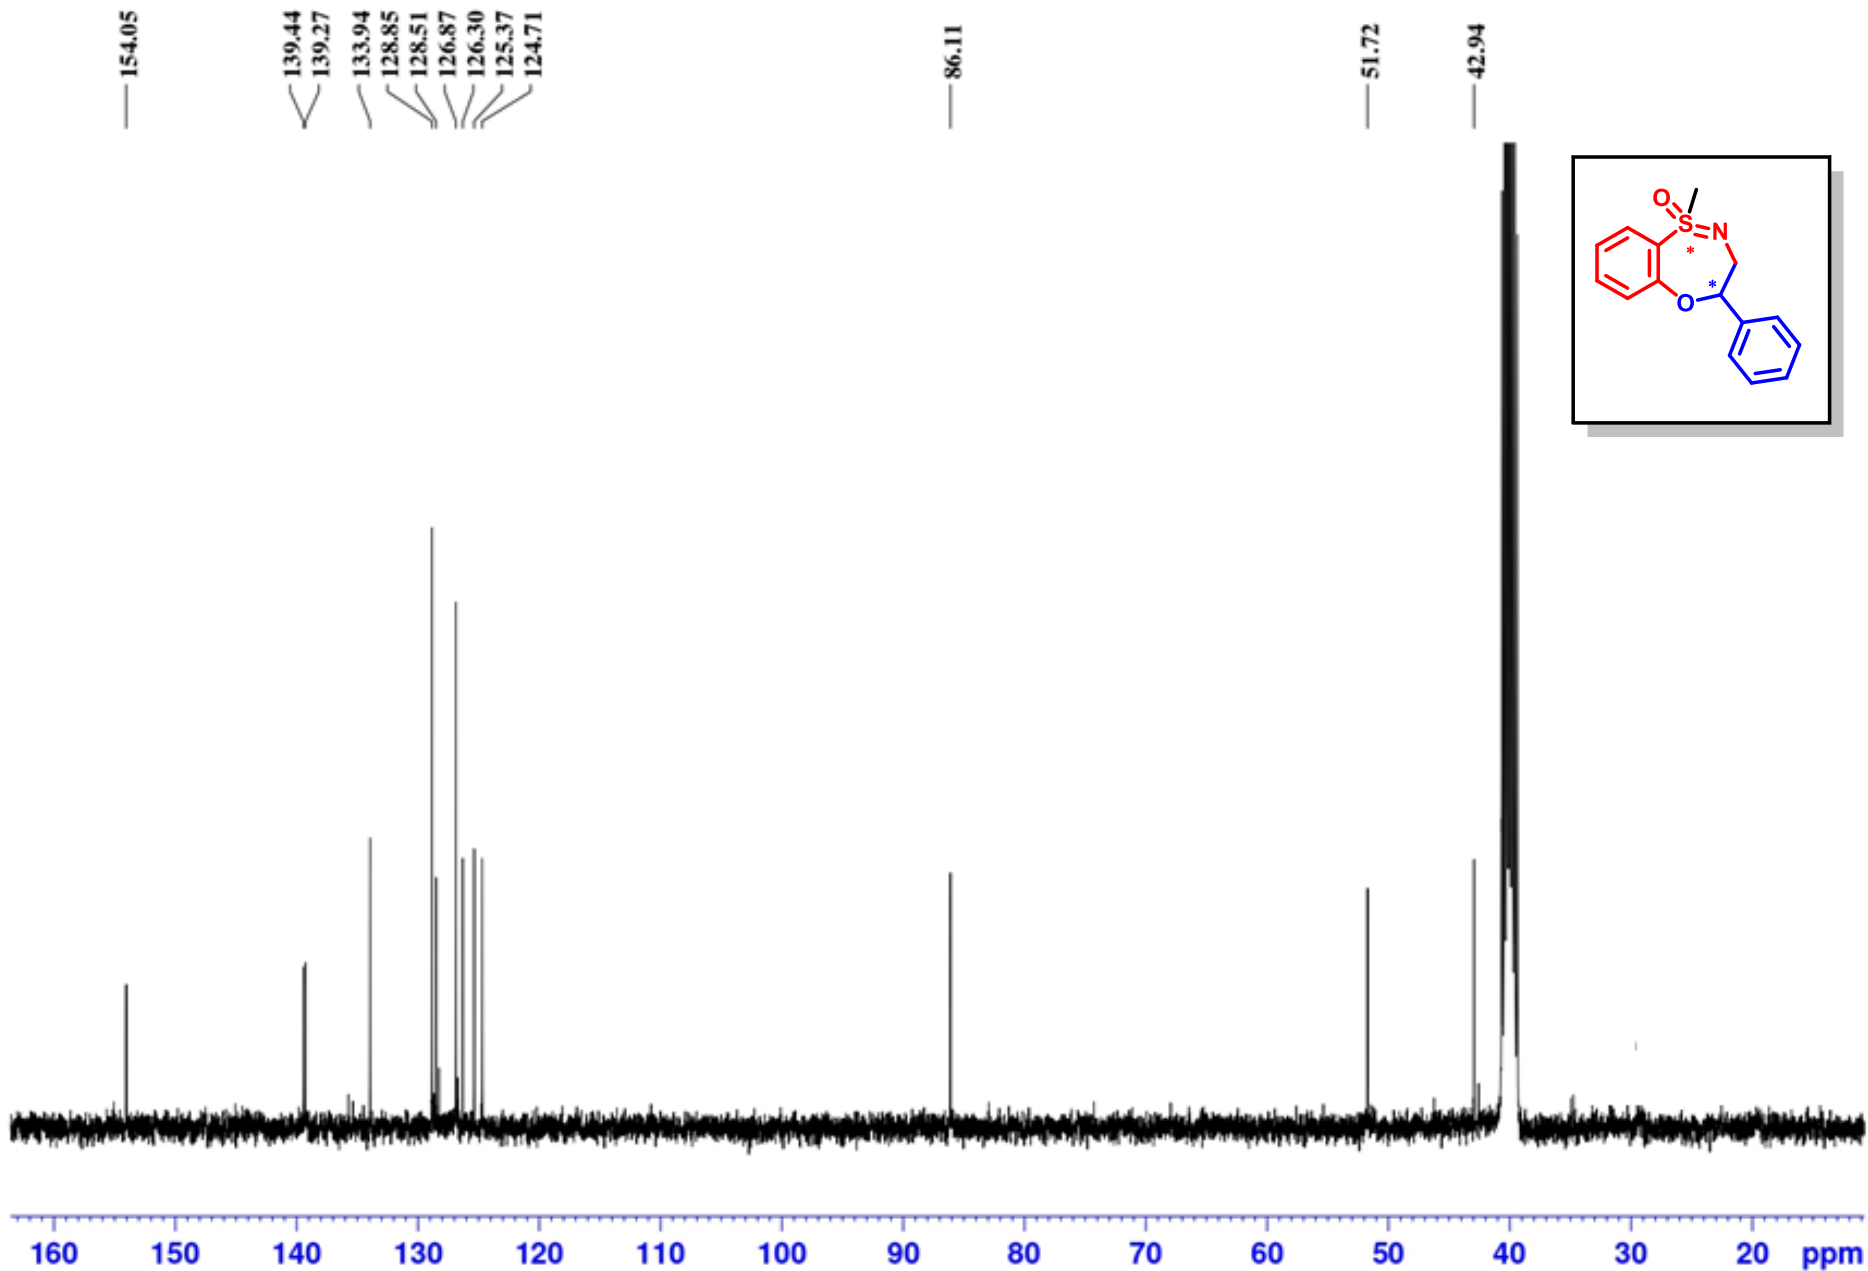

**Fig S-26:**  $^{13}\text{C}$  NMR Spectra of Compound **4a** (100 MHz,  $\text{DMSO-d}_6$ )

## SAIF [HRMS Report]

|                   |                      |                       |                                  |
|-------------------|----------------------|-----------------------|----------------------------------|
| Data File:        | HRMS21111FEB04       | Original Data Path:   | D:\INTERNAL NEW\2021\Feb<br>2021 |
| Sample ID:        | AB-134E              | Sample Name:          |                                  |
| Acquisition Date: | 02/11/21 11:03:53 AM | Run Time(min):        | 0.00                             |
| Vial:             | CStk1-01:4           | Injection Volume(ul): | 1.00                             |

HRMS21111FEB04 #33-65 RT: 0.25-0.50 AV: 33 SB: 1 0.01 NL: 6.56E6  
T: FTMS + c ESI Full ms [100.00-750.00]

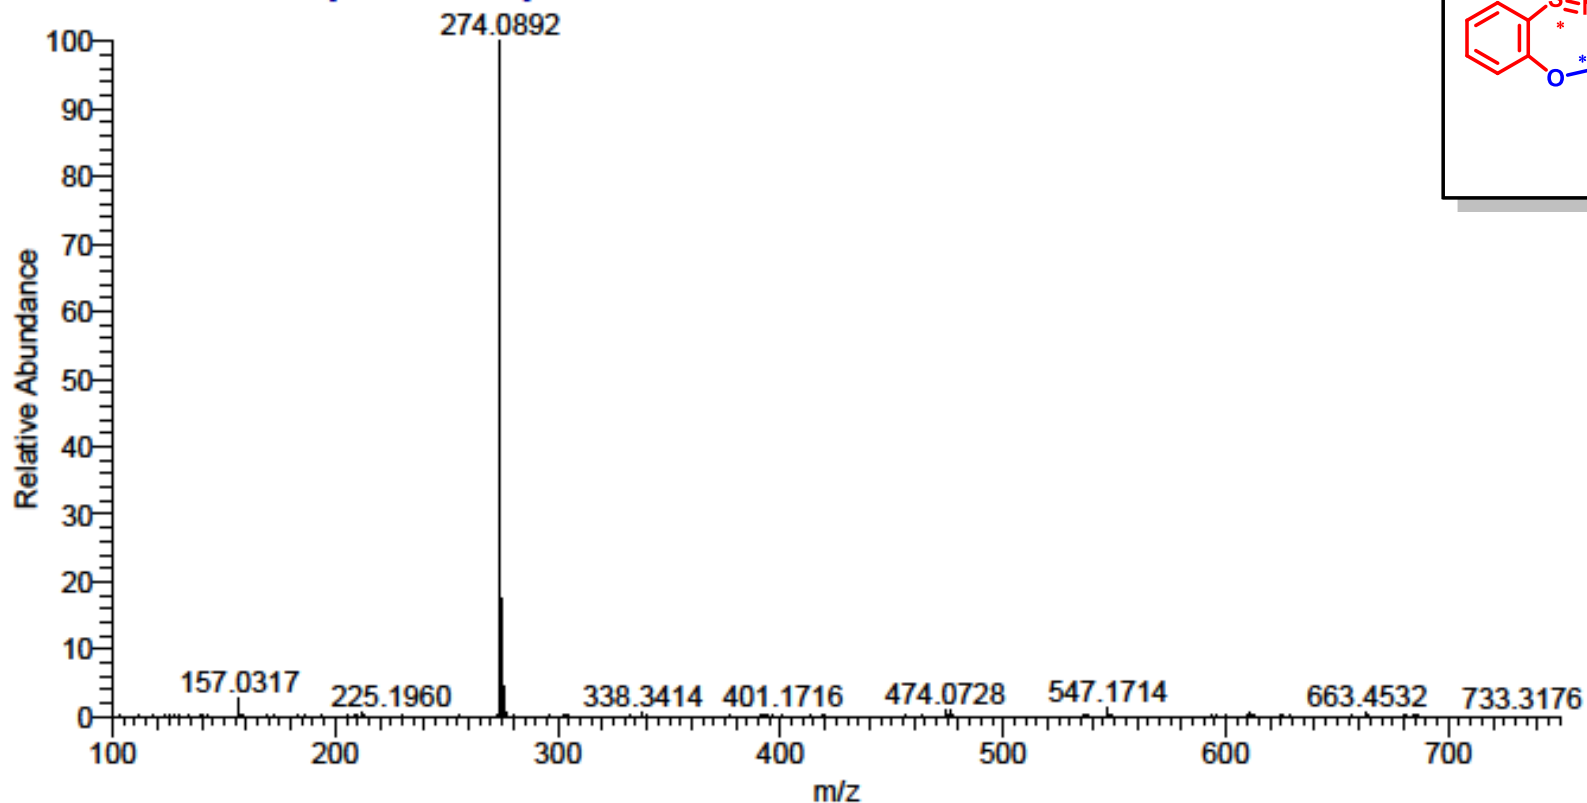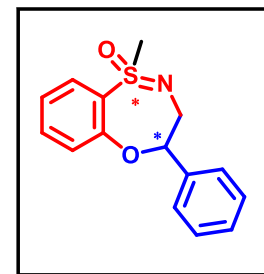

Fig S-27: HRMS report of Compound 4a



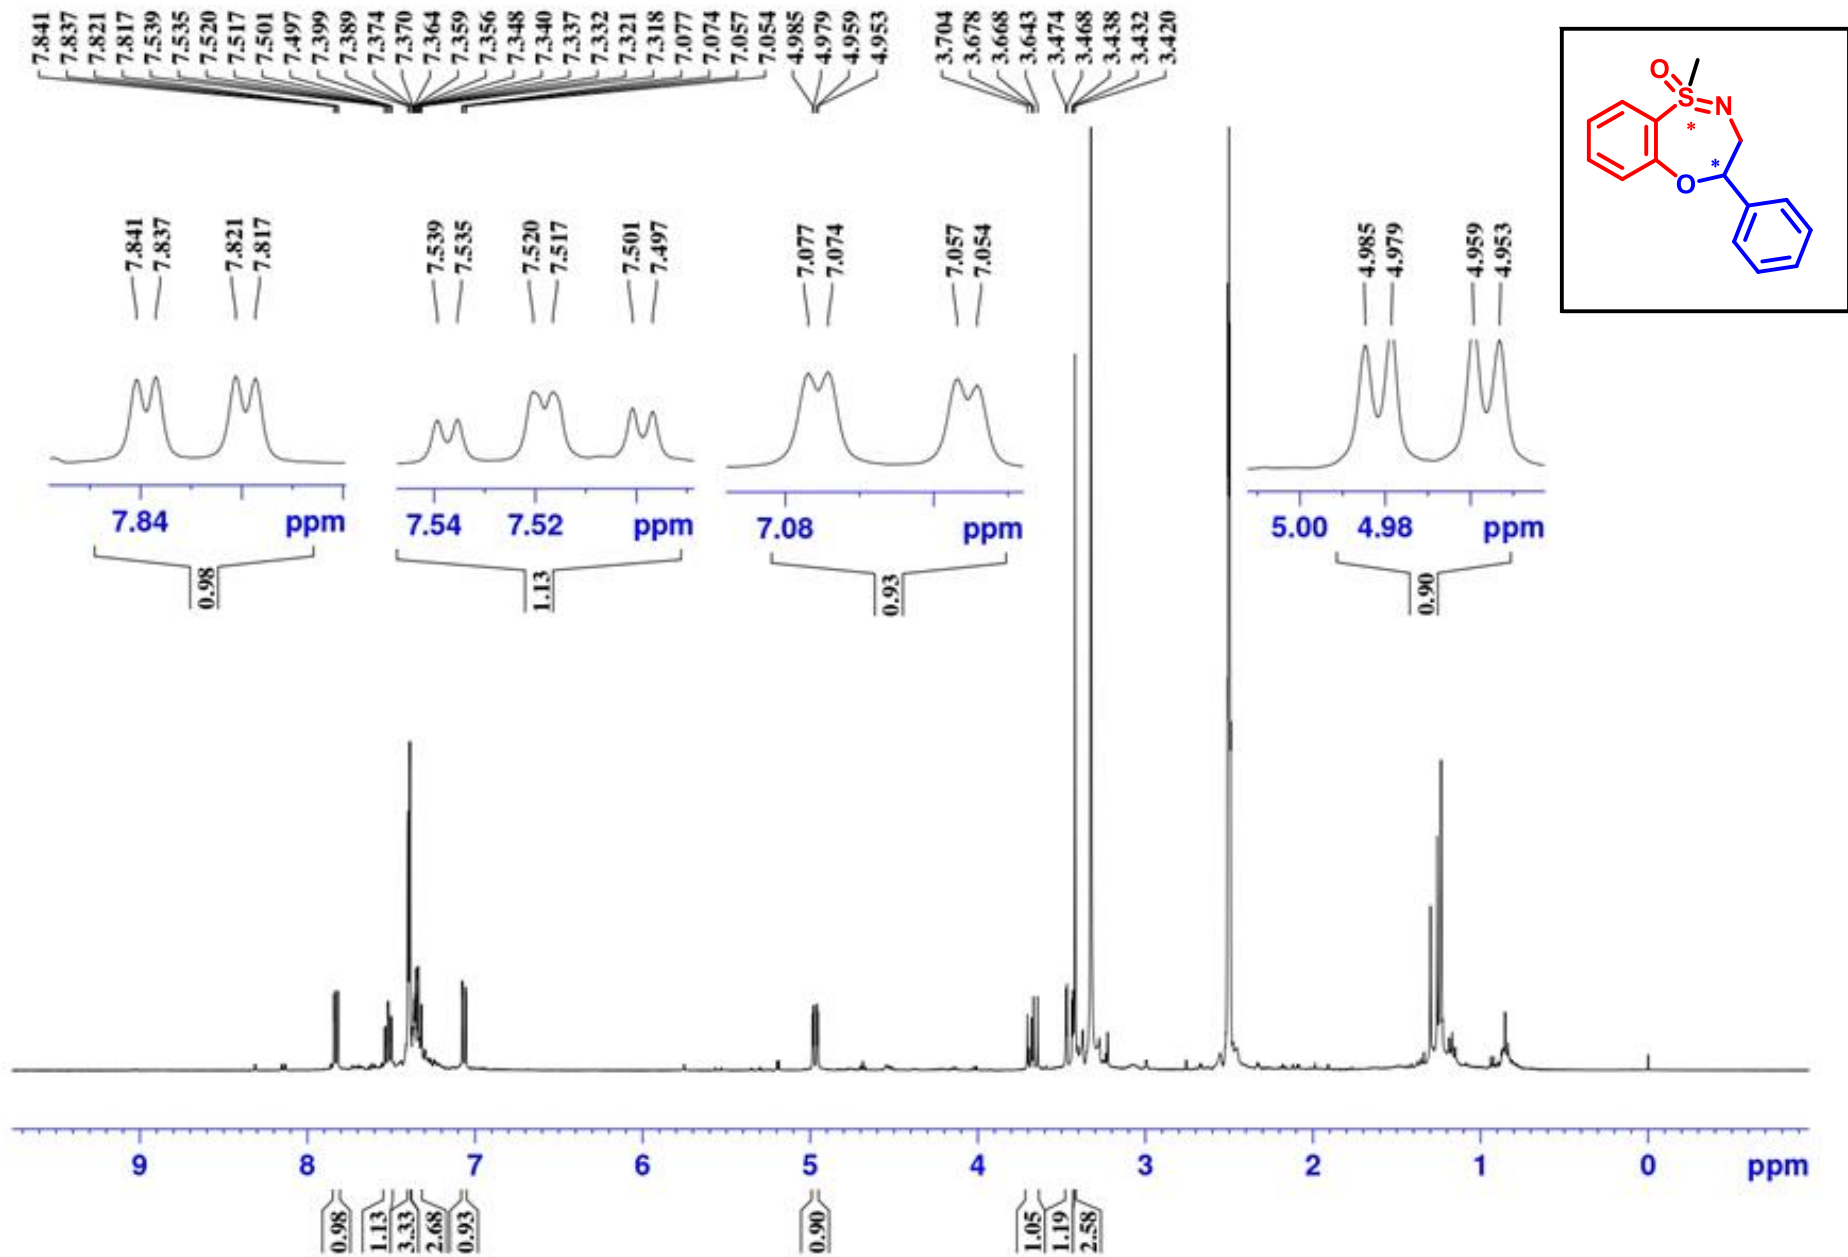

Fig S-28:  $^1\text{H}$  NMR Spectra of Compound 4a' (400 MHz,  $\text{DMSO-d}_6$ )

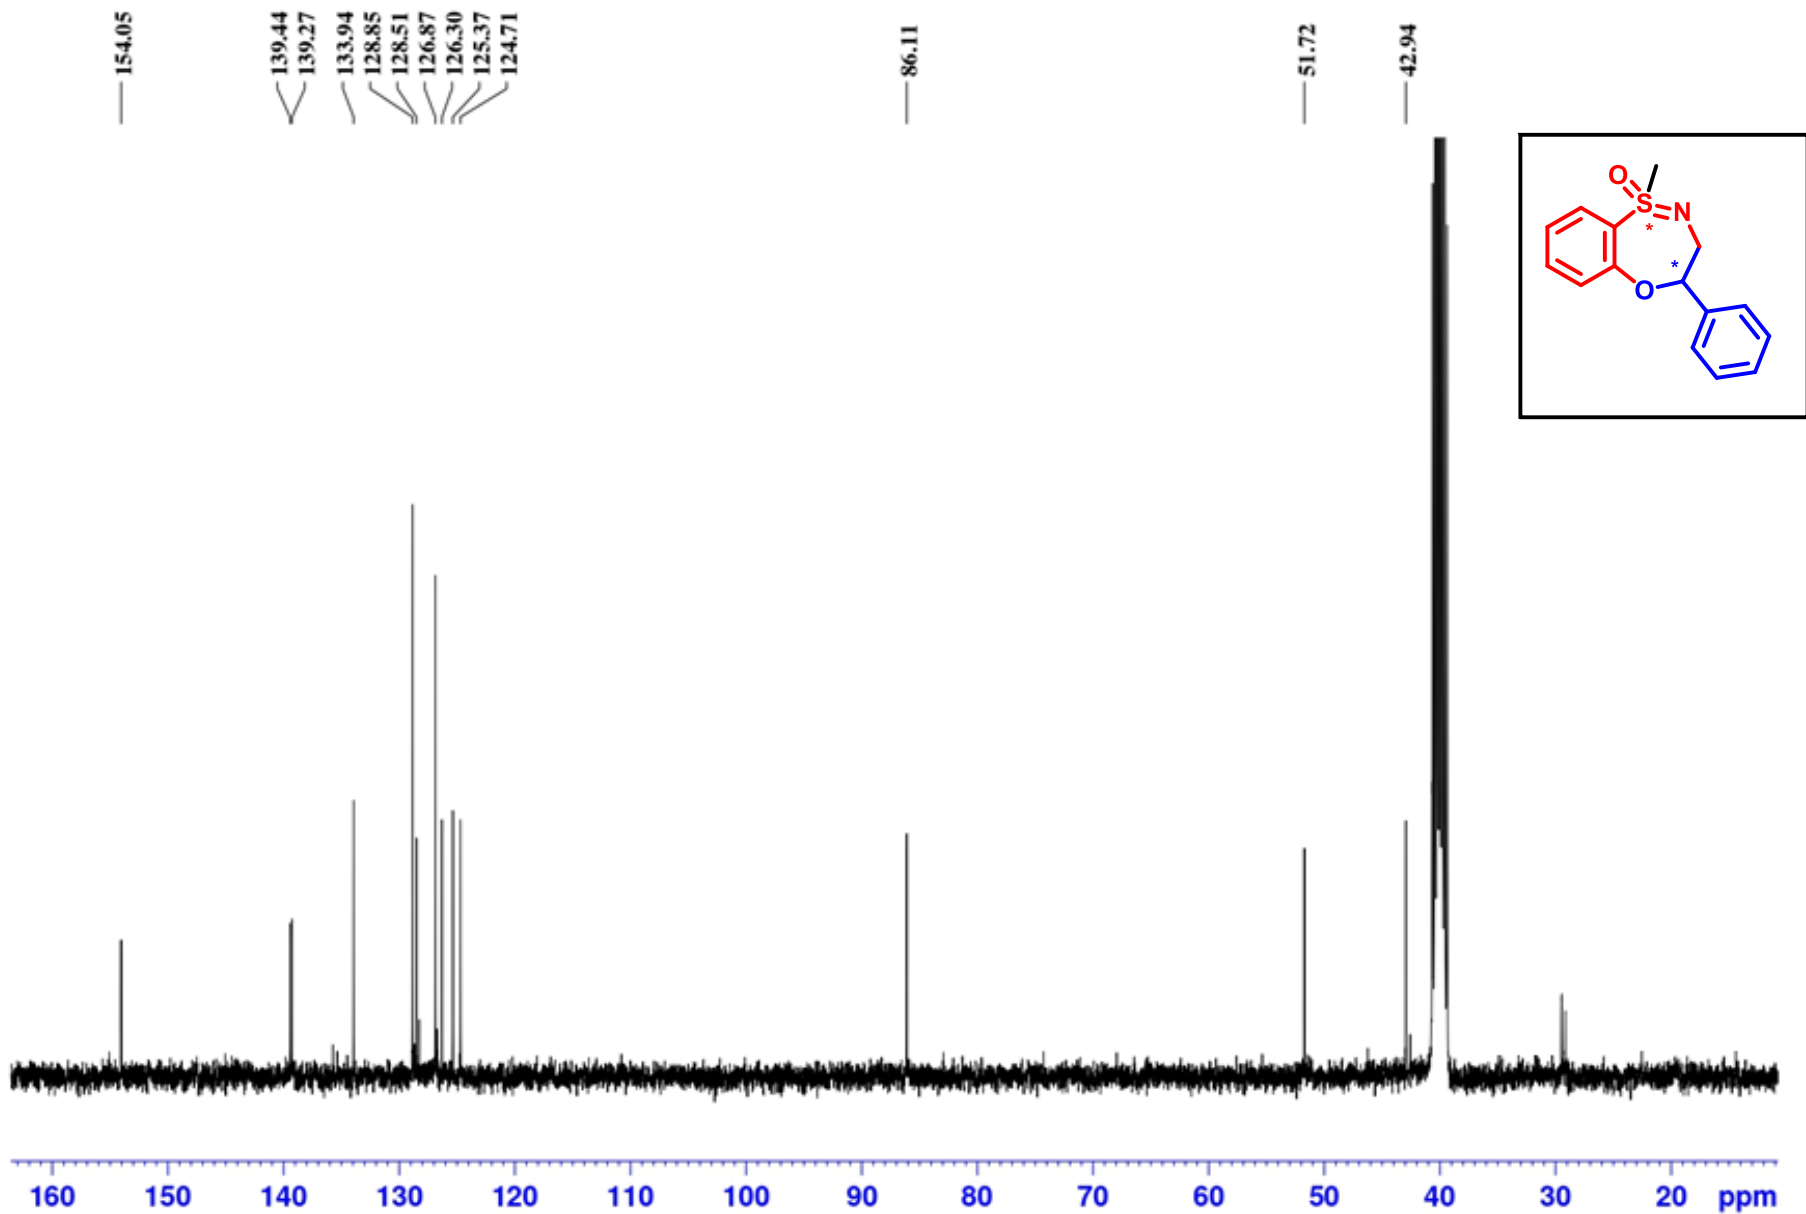

**Fig S-29:**  $^{13}\text{C}$  NMR Spectra of Compound **4a'** (100 MHz,  $\text{DMSO-d}_6$ )

### SAIF [HRMS Report]

|                   |                      |                       |                                  |
|-------------------|----------------------|-----------------------|----------------------------------|
| Data File:        | HRMS21111FEB05       | Original Data Path:   | D:\INTERNAL NEW\2021\Feb<br>2021 |
| Sample ID:        | AB-134F              | Sample Name:          |                                  |
| Acquisition Date: | 02/11/21 11:05:54 AM | Run Time(min):        | 0.00                             |
| Vial:             | CStk1-01:5           | Injection Volume(μl): | 1.00                             |

HRMS21111FEB05 #32-64 RT: 0.25-0.50 AV: 33 SB: 1 0.01 NL: 4.07E6  
T: FTMS + c ESI Full ms [100.00-750.00]

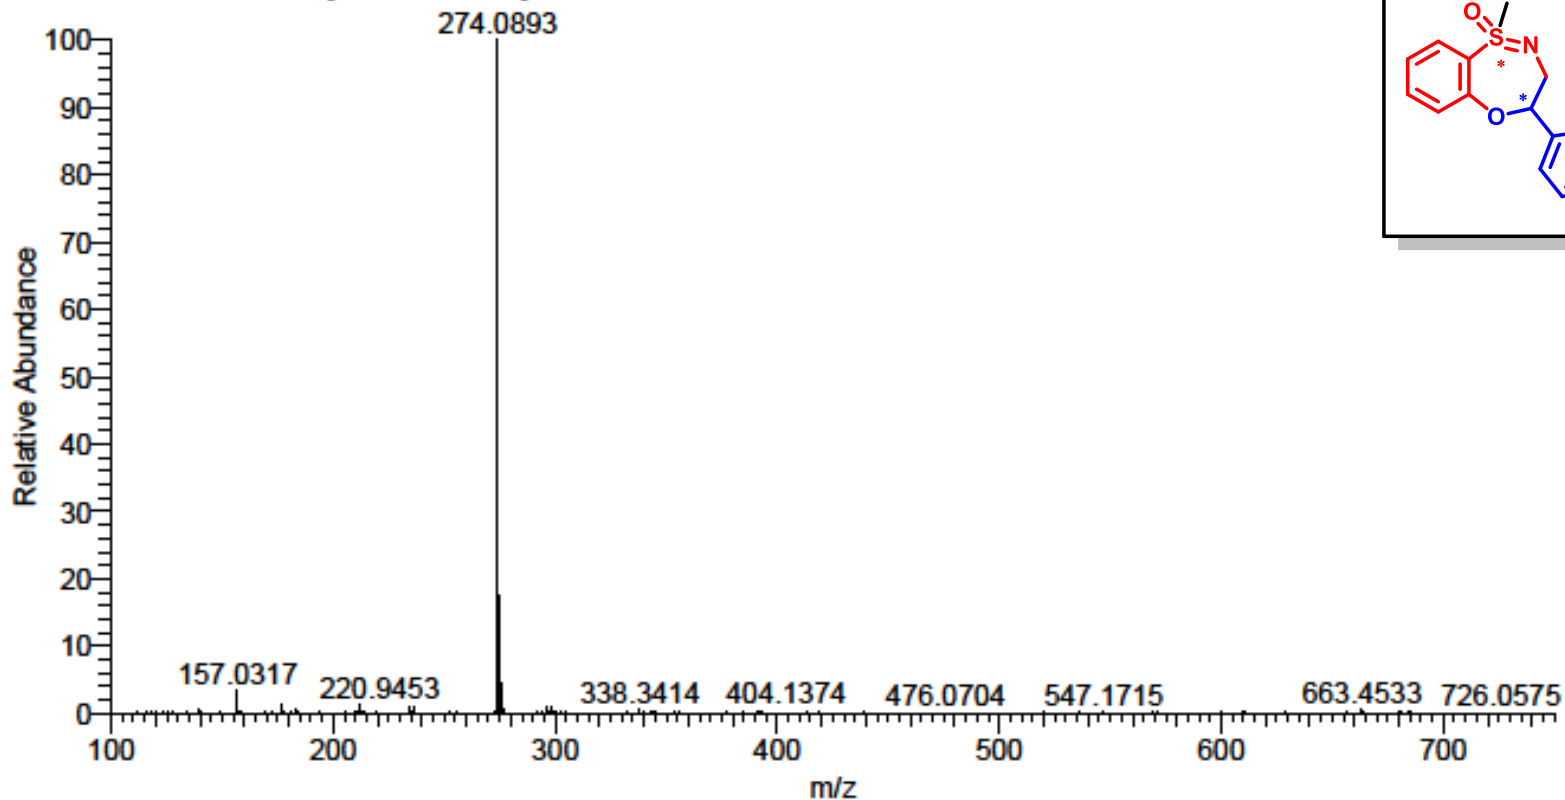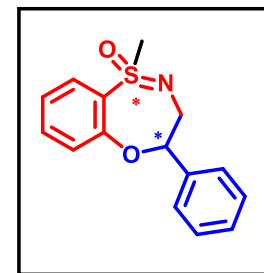

Fig S-30: HRMS report of Compound 4a'

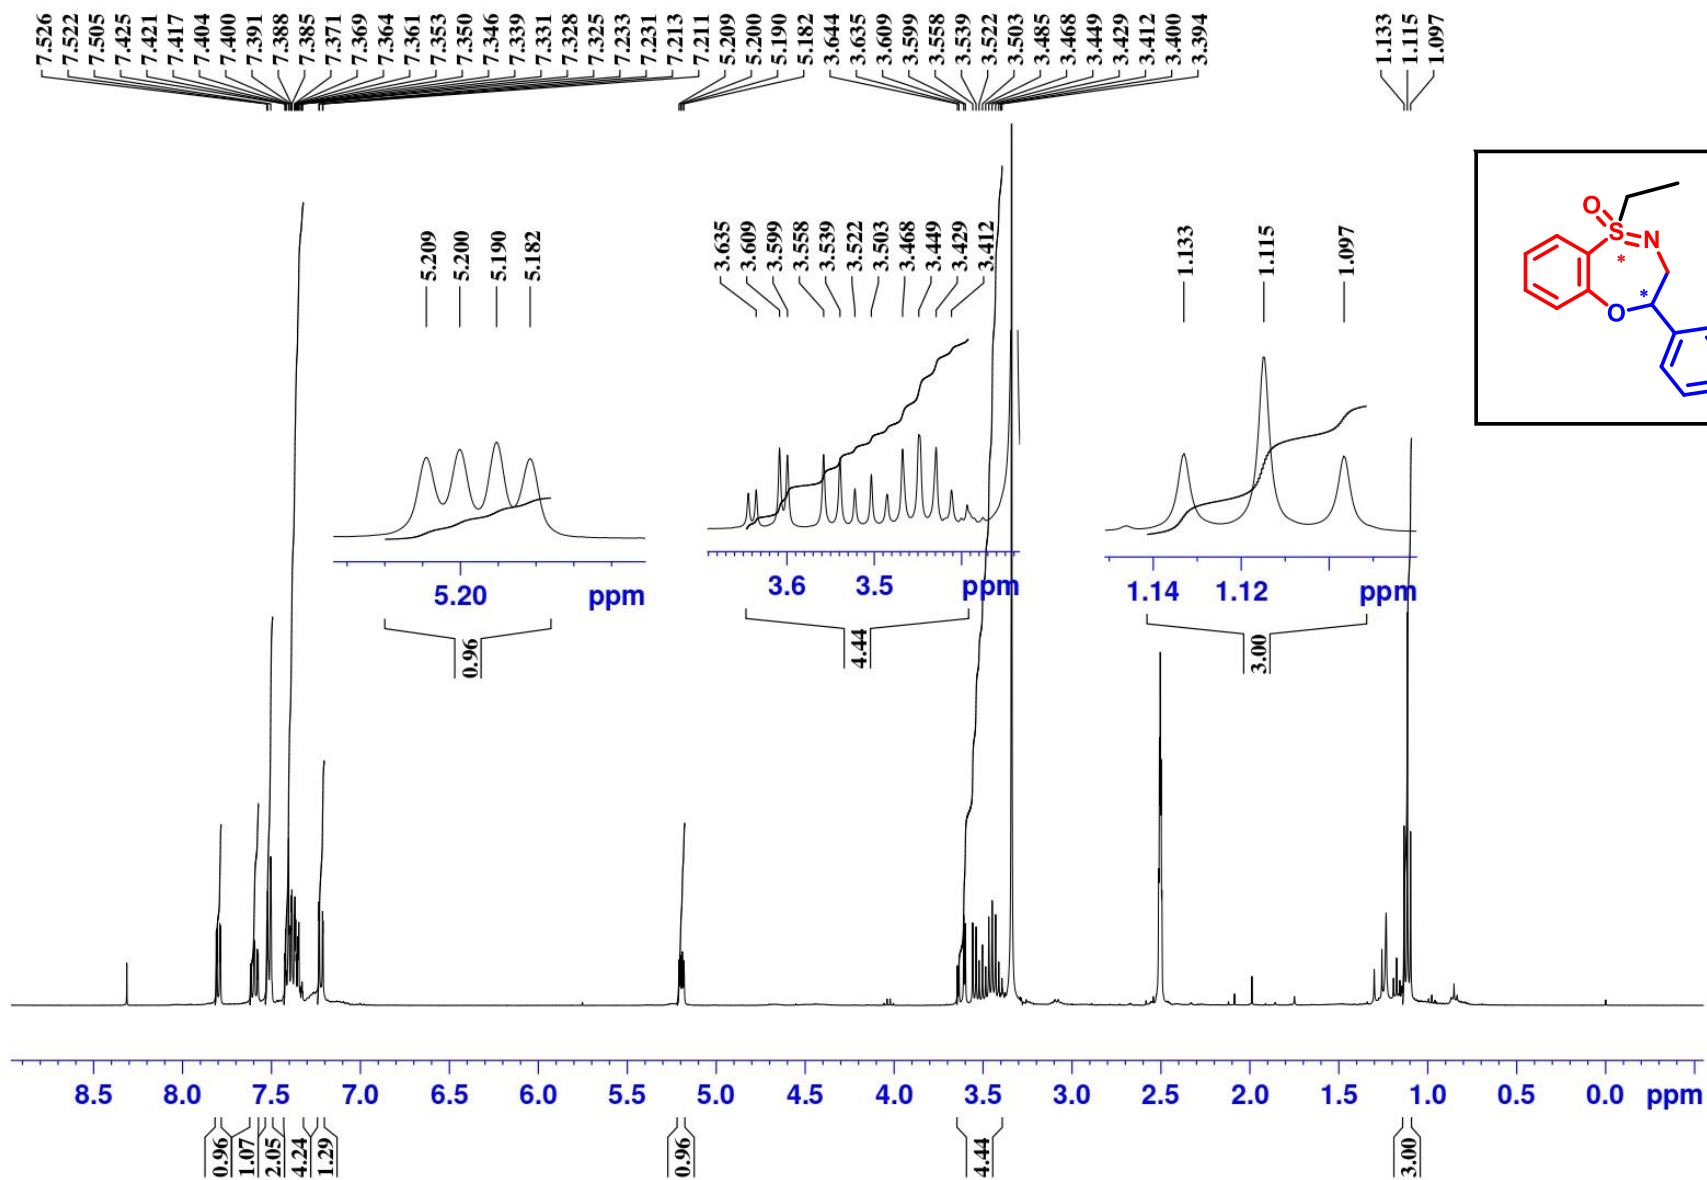

**Fig S-31: <sup>1</sup>H NMR Spectra of Compound 4b' (400 MHz, DMSO-d<sub>6</sub>)**

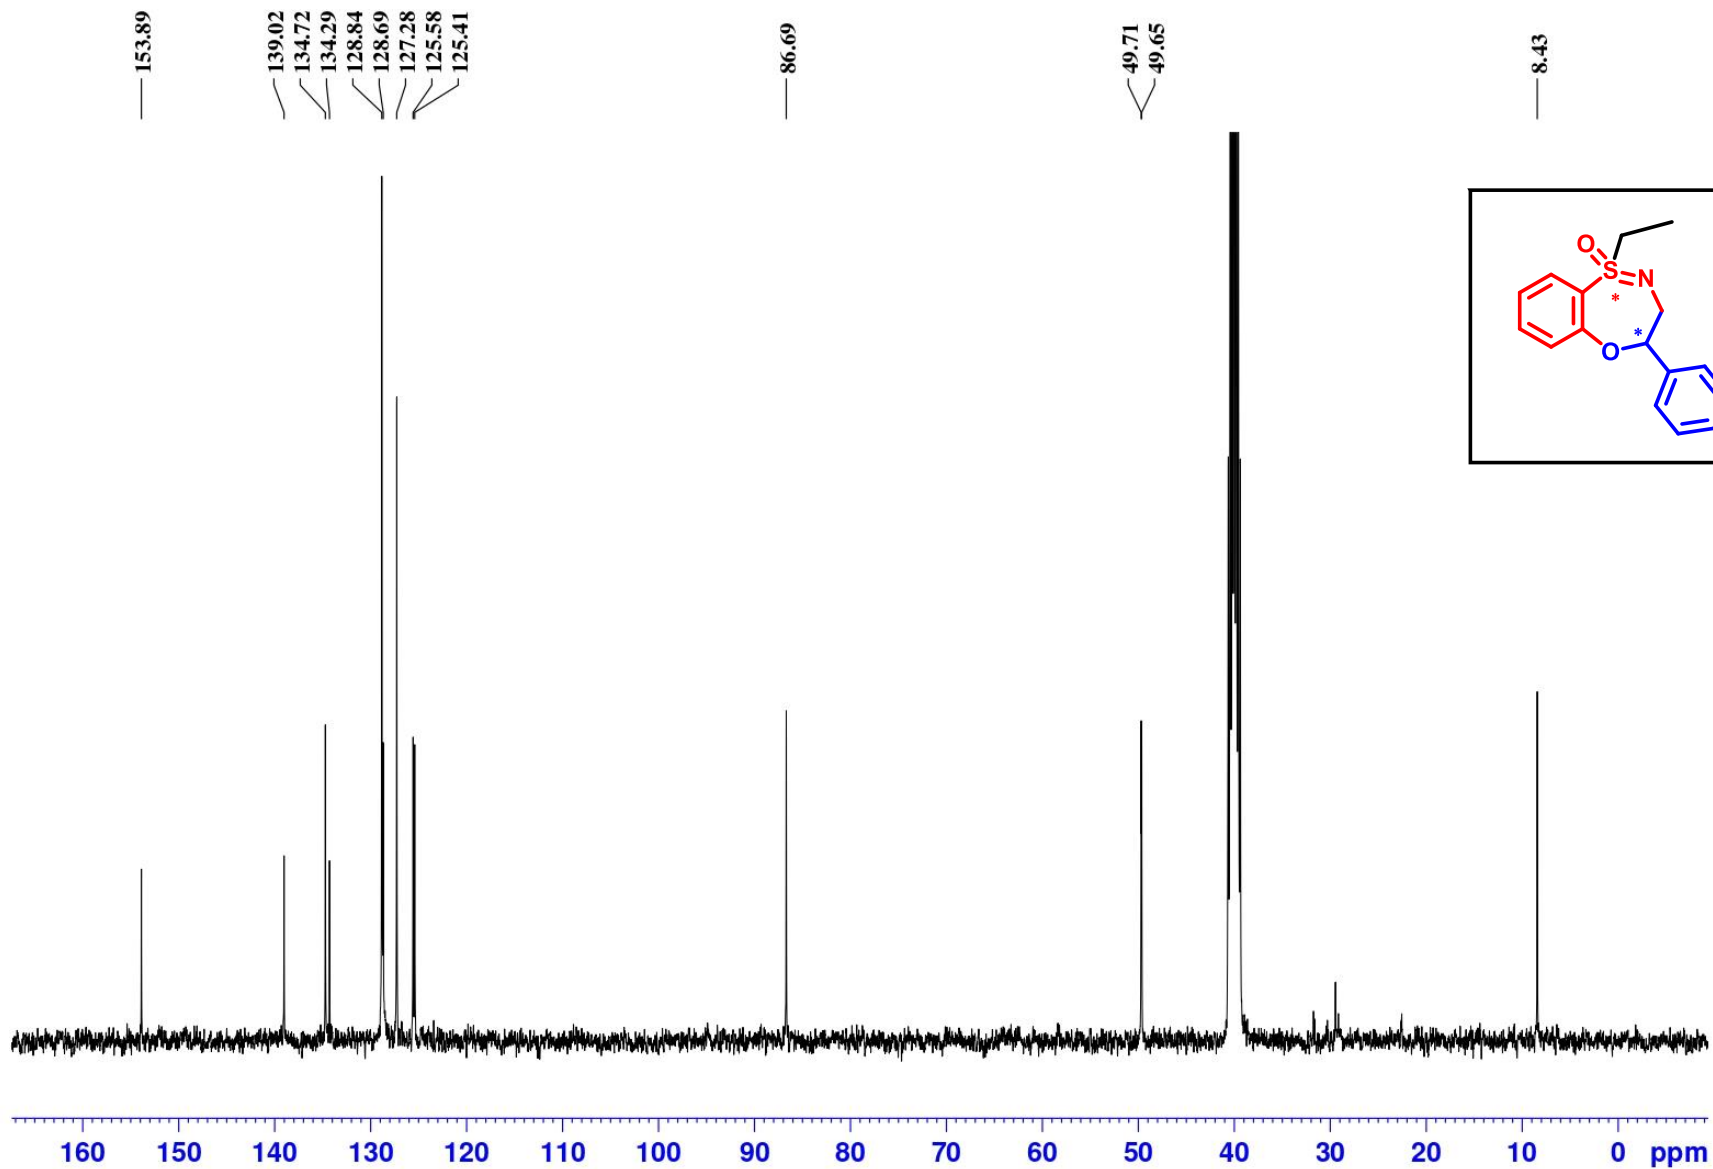

**Fig S-32:**  $^{13}\text{C}$  NMR Spectra of Compound **4b**(100 MHz,  $\text{DMSO-d}_6$ )

### SAIF [HRMS Report]

|                   |                      |                       |                          |
|-------------------|----------------------|-----------------------|--------------------------|
| Data File:        | HRMS21I15FEB09       | Original Data Path:   | D:\INTERNAL NEW\2021\Feb |
| Sample ID:        | AB-138A              | Sample Name:          | 2021                     |
| Acquisition Date: | 02/15/21 12:06:28 PM | Run Time(min):        | 0.00                     |
| Vial:             | CStk1-01:9           | Injection Volume(ul): | 1.00                     |

HRMS21I15FEB09 #30-64 RT: 0.25-0.50 AV: 35 SB: 1 0.01 NL: 1.65E7  
T: FTMS + c ESI Full ms [100.00-750.00]

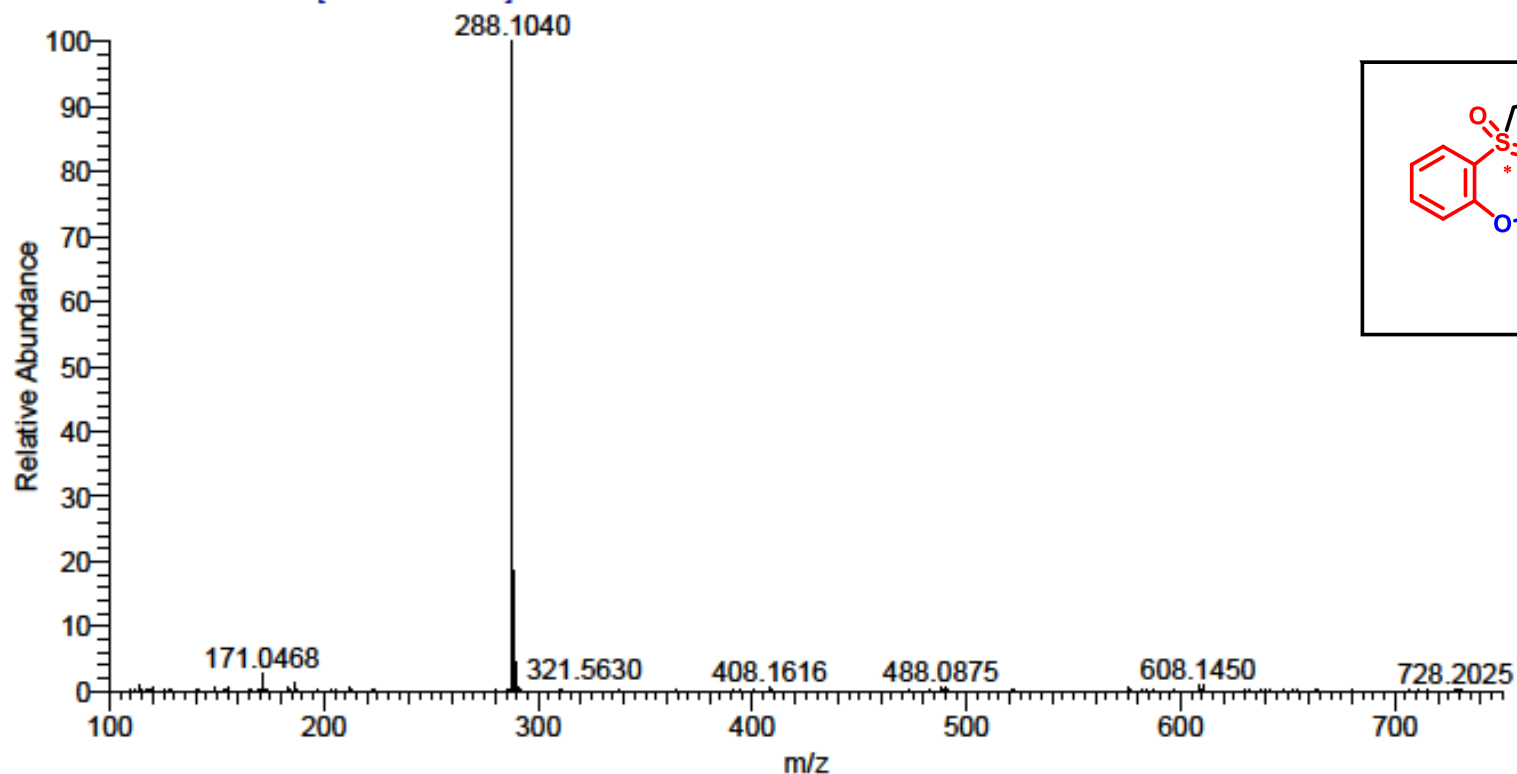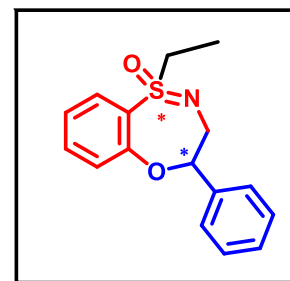

Fig S-33: HRMS report of Compound 4b.

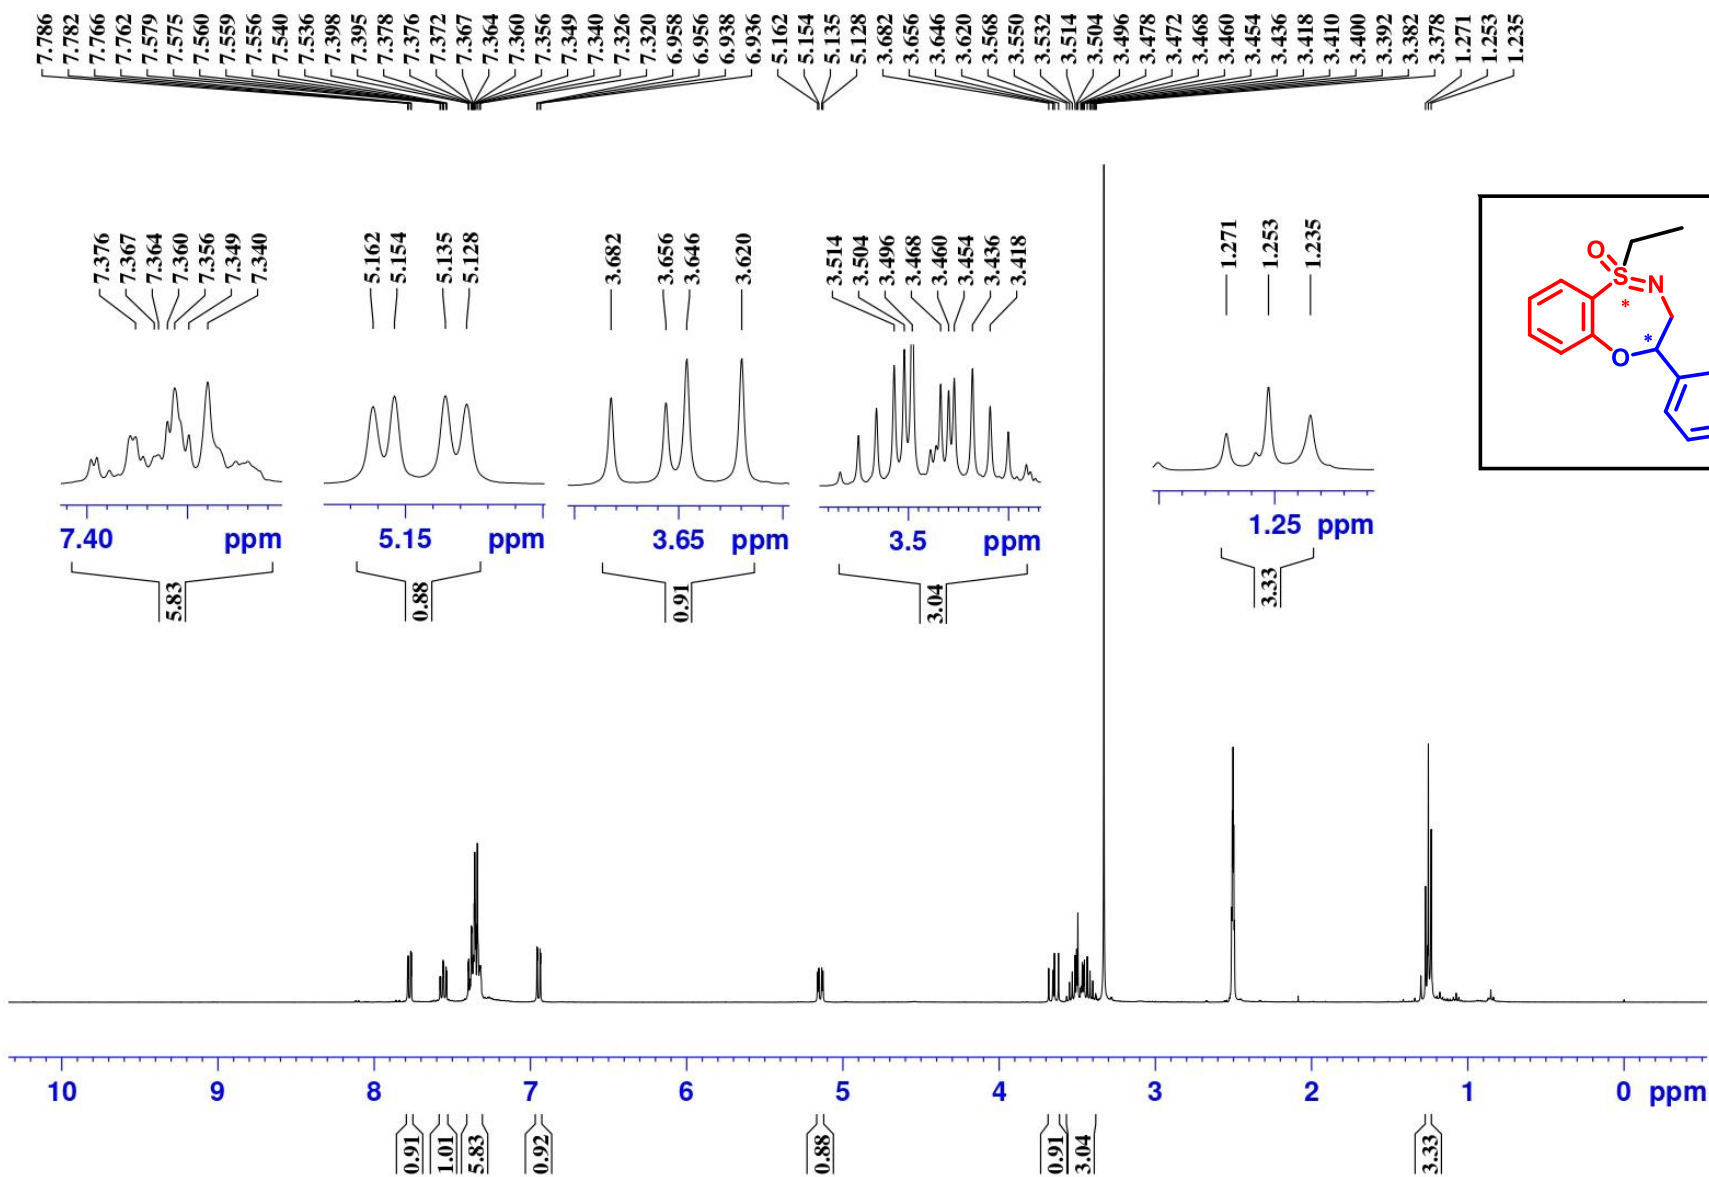

**Fig S-34:**  $^1\text{H}$  NMR Spectra of Compound **4b'** (400 MHz,  $\text{DMSO-d}_6$ )

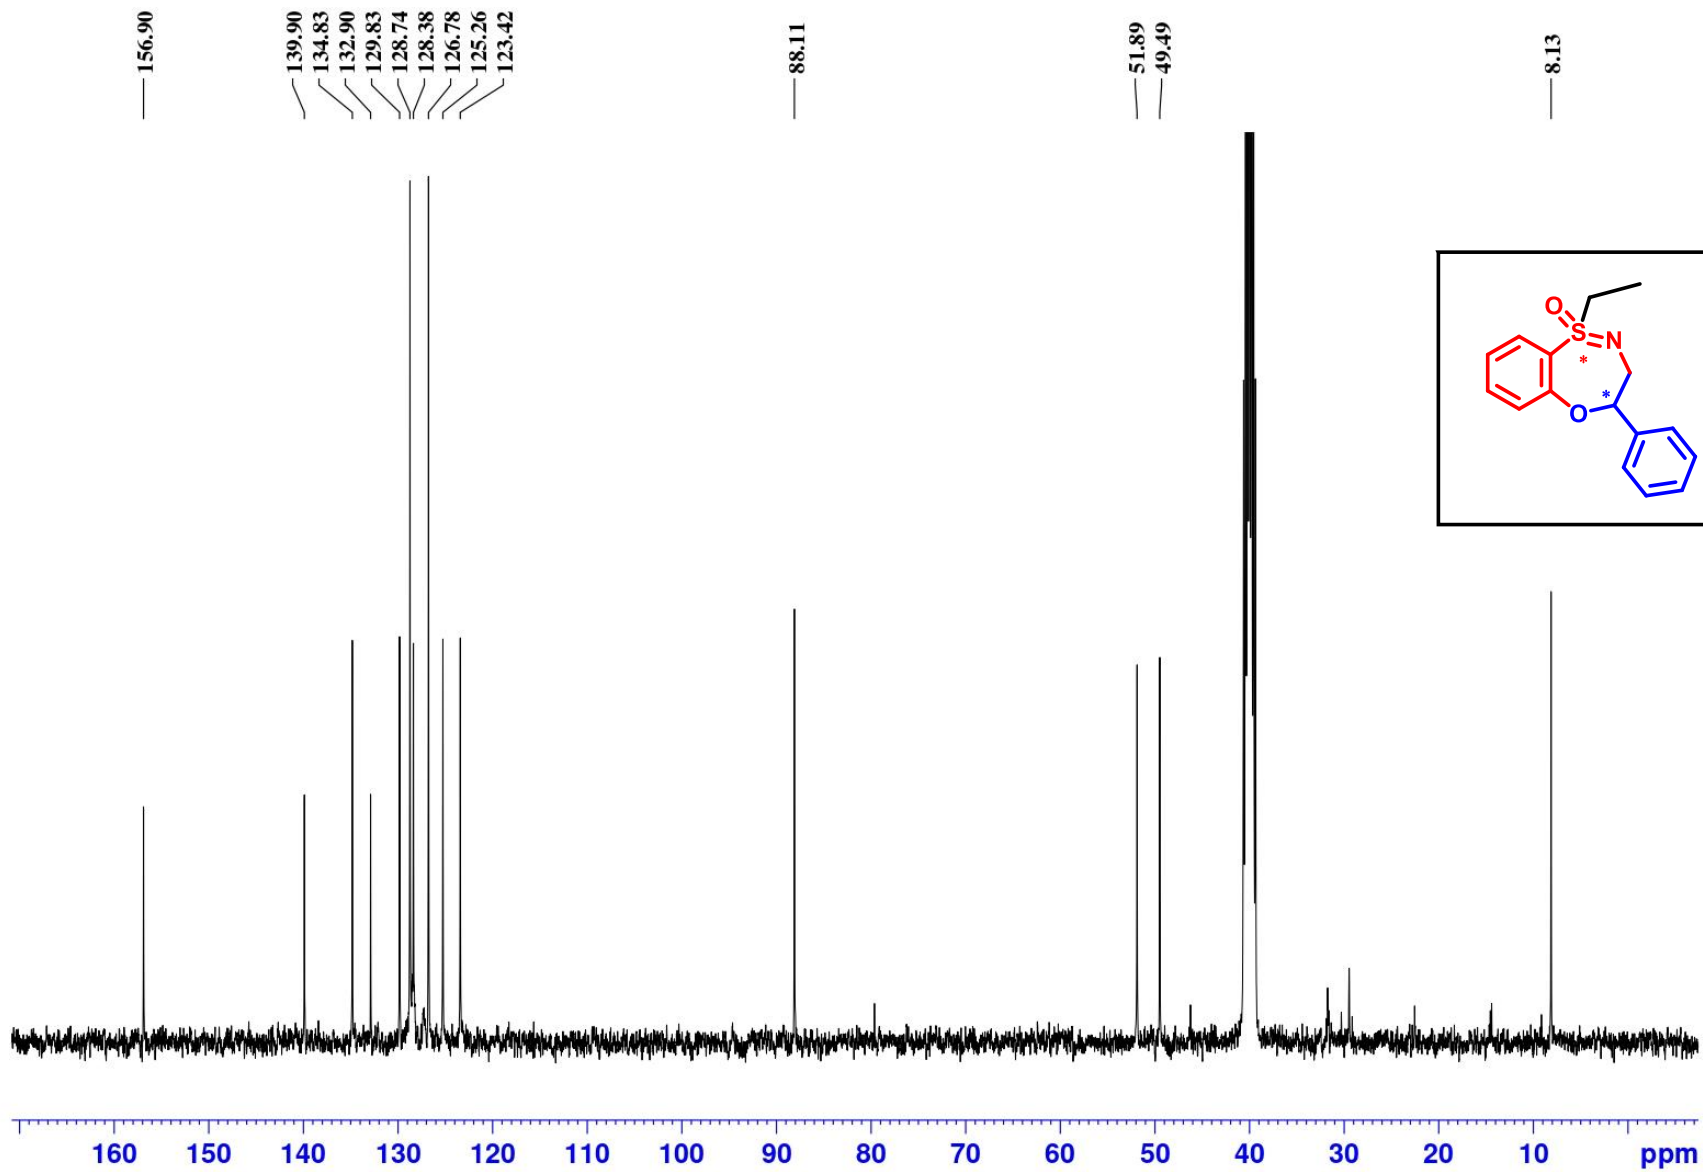

**Fig S-35:** <sup>13</sup>C NMR Spectra of Compound **4b'** (100 MHz, DMSO-d<sub>6</sub>)



## SAIF [HRMS Report]

|                   |                      |                       |                                  |
|-------------------|----------------------|-----------------------|----------------------------------|
| Data File:        | HRMS21I15FEB10       | Original Data Path:   | D:\INTERNAL NEW\2021\Feb<br>2021 |
| Sample ID:        | AB-138B              | Sample Name:          |                                  |
| Acquisition Date: | 02/15/21 12:08:27 PM | Run Time(min):        | 0.00                             |
| Vial:             | CS&k1-01:10          | Injection Volume(μl): | 1.00                             |

HRMS21I15FEB10 #30-63 RT: 0.25-0.50 AV: 34 SB: 1 0.01 NL: 6.41E6  
T: FTMS + c ESI Full ms [100.00-750.00]

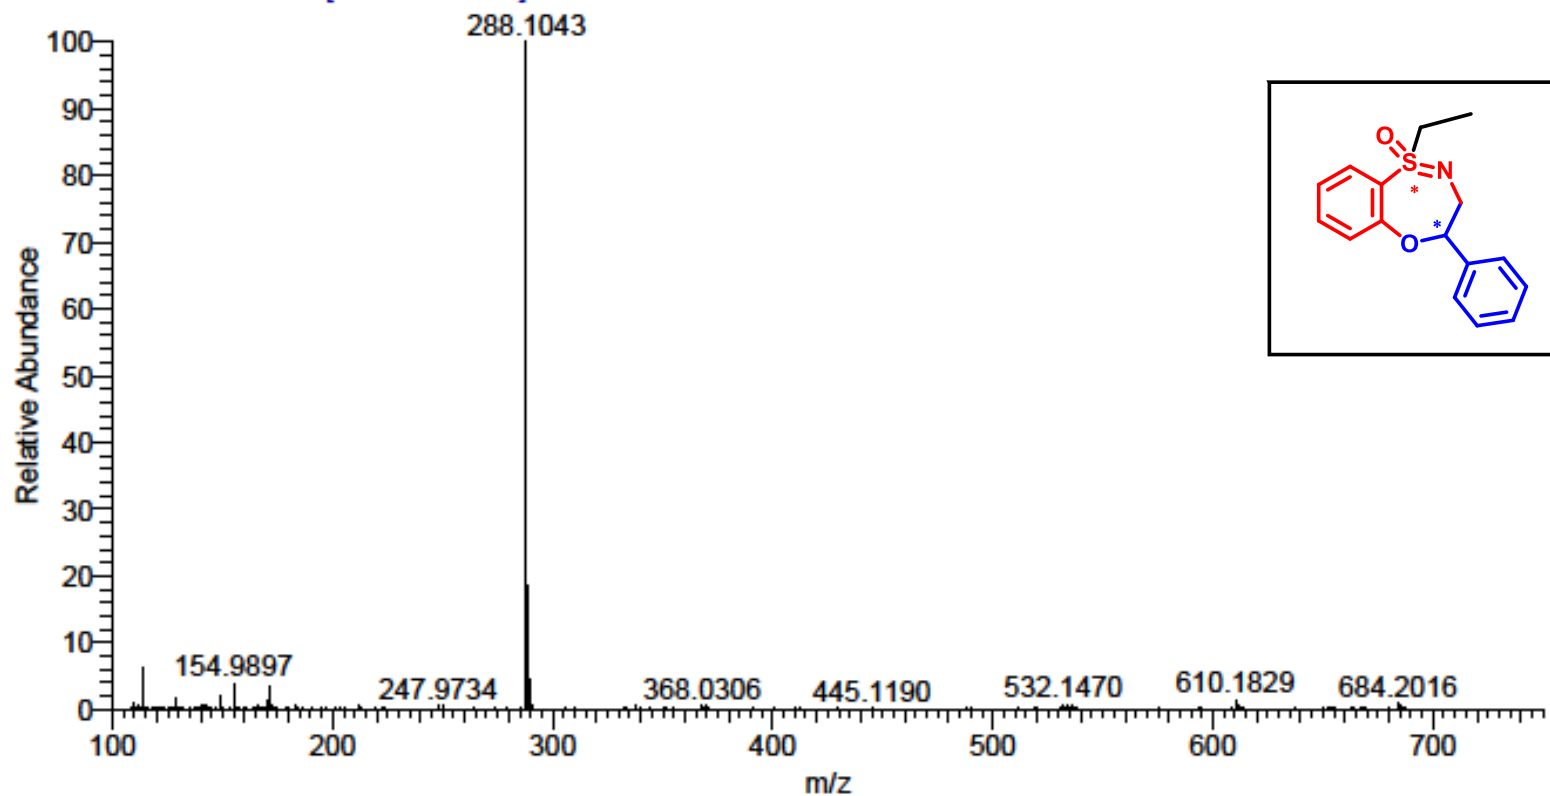

Fig S-36: HRMS report of Compound 4b'

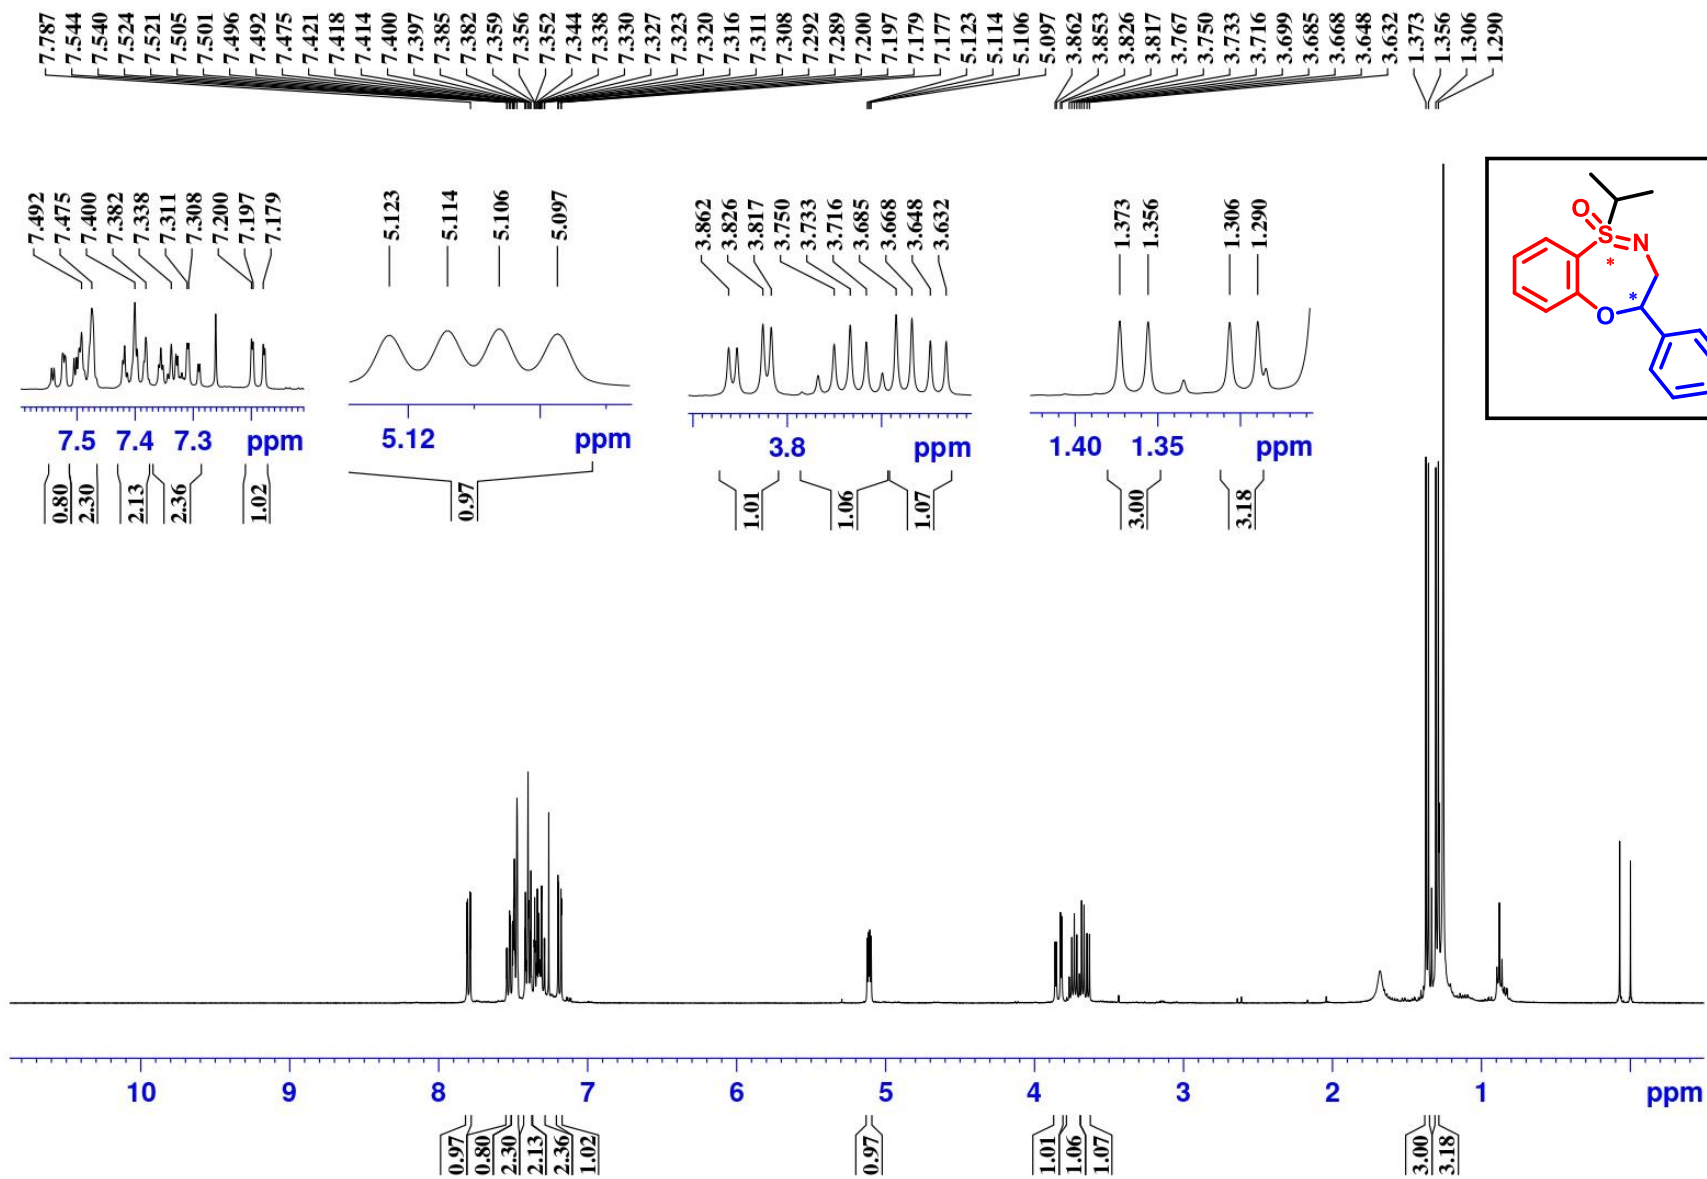

**Fig S-37:**  $^1\text{H}$  NMR Spectra of Compound **4c** (400 MHz,  $\text{CDCl}_3$ )

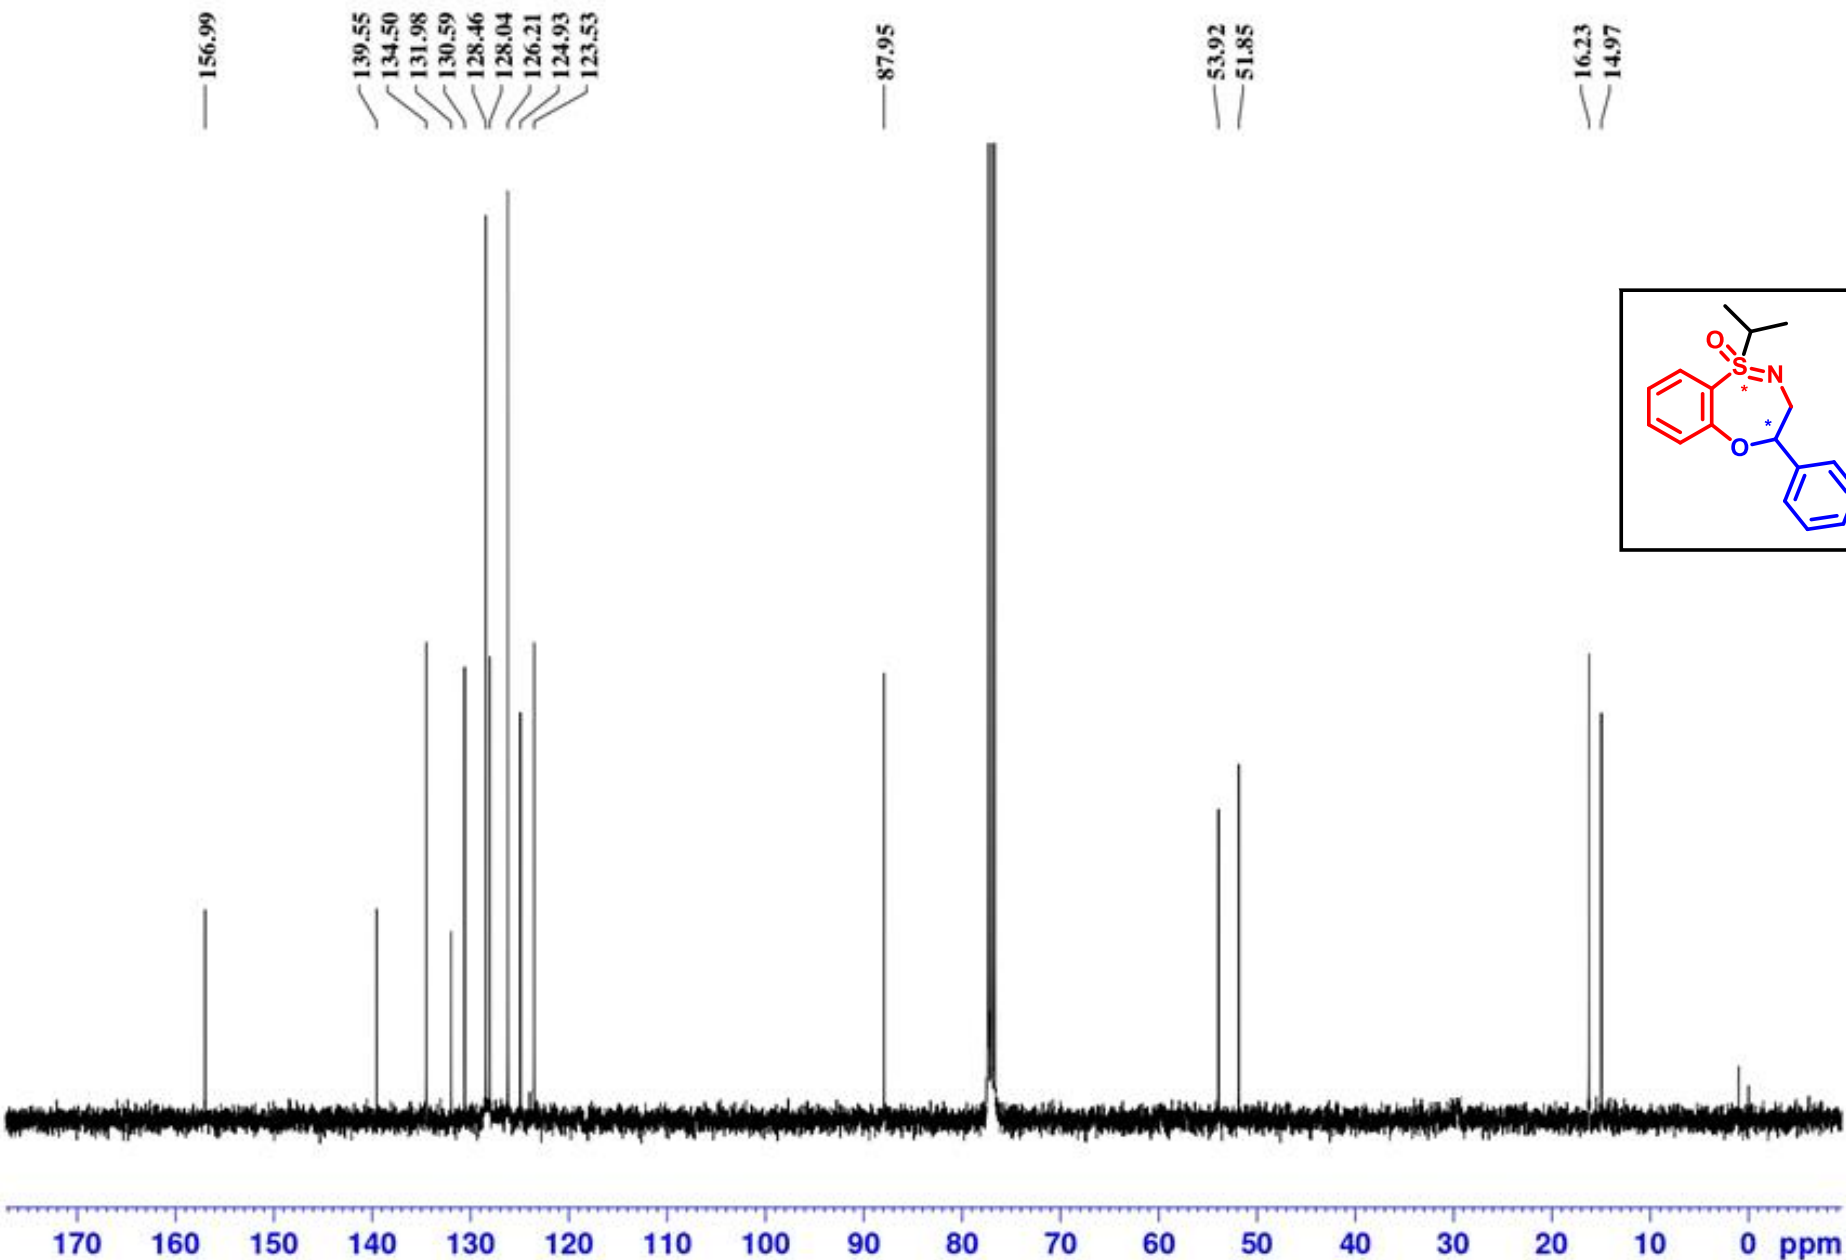

**Fig S-38:**  $^{13}\text{C}$  NMR Spectra of Compound **4c** (100 MHz,  $\text{DMSO-d}_6$ )

### SAIF [HRMS Report]

|                   |                      |                       |                                  |
|-------------------|----------------------|-----------------------|----------------------------------|
| Data File:        | HRMS21111FEB02       | Original Data Path:   | D:\INTERNAL NEW\2021\Feb<br>2021 |
| Sample ID:        | AB-149A              | Sample Name:          |                                  |
| Acquisition Date: | 02/11/21 10:59:55 AM | Run Time(min):        | 0.00                             |
| Vial:             | CStk1-01:2           | Injection Volume(ul): | 1.00                             |

HRMS21111FEB02 #33-66 RT: 0.25-0.50 AV: 34 SB: 1 0.01 NL: 5.55E6  
T: FTMS + c ESI Full ms [100.00-750.00]

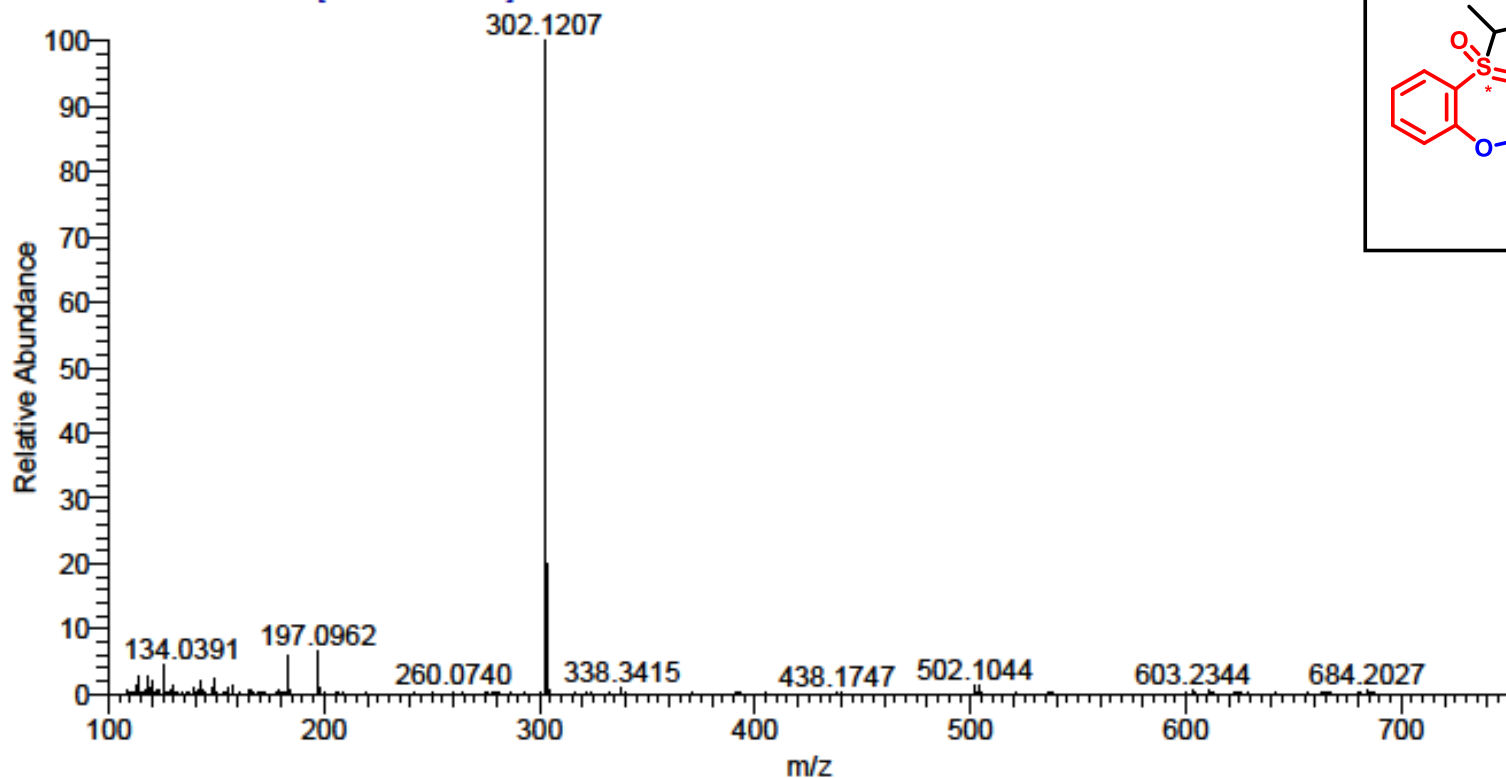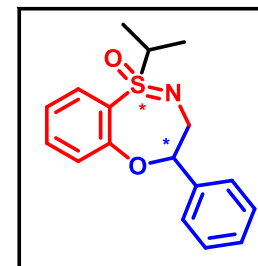

Fig S-39: HRMS report of Compound 4c

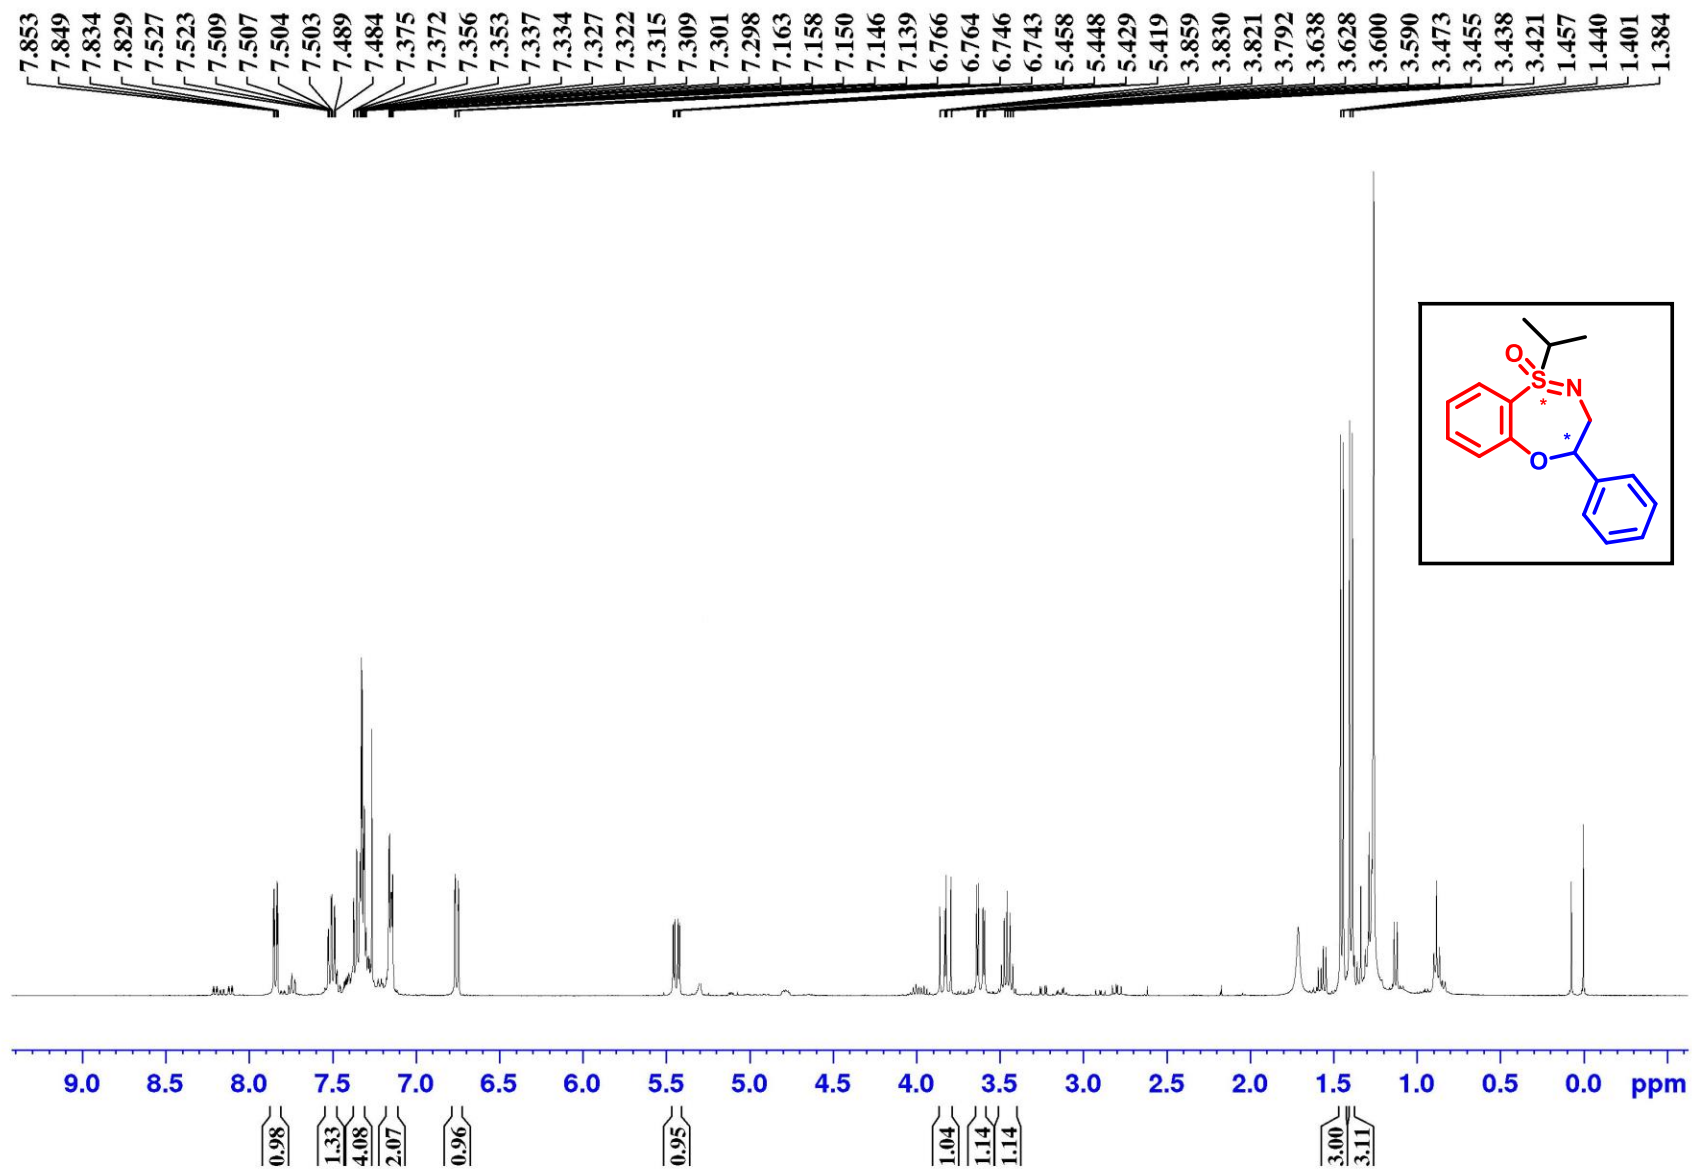

**Fig S-40:**  $^1\text{H}$  NMR Spectra of Compound 4c' (400 MHz,  $\text{CDCl}_3$ )

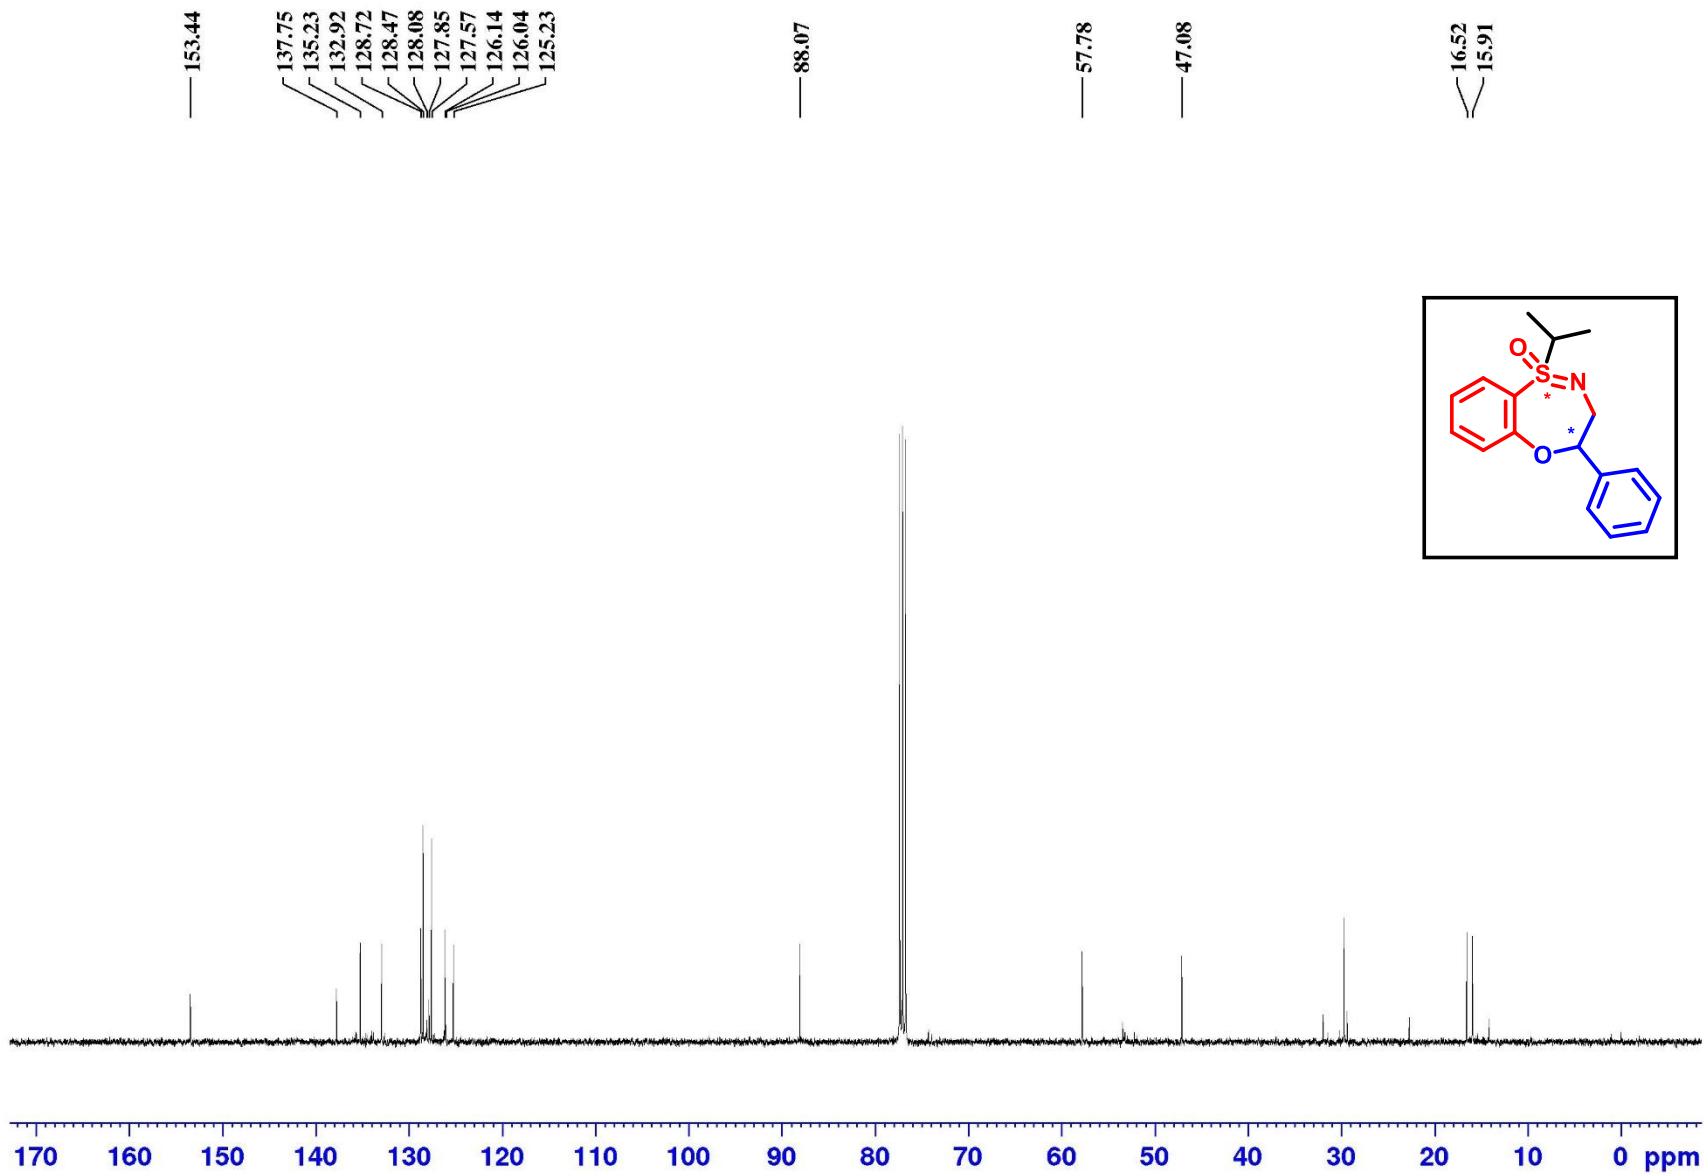

**Fig S-41:**  $^{13}\text{C}$  NMR Spectra of Compound **4c'** (100 MHz,  $\text{DMSO-d}_6$ )

### SAIF [HRMS Report]

|                   |                      |                       |                                  |
|-------------------|----------------------|-----------------------|----------------------------------|
| Data File:        | HRMS21111FEB03       | Original Data Path:   | D:\INTERNAL NEW\2021\Feb<br>2021 |
| Sample ID:        | AB-149B              | Sample Name:          |                                  |
| Acquisition Date: | 02/11/21 11:01:54 AM | Run Time(min):        | 0.00                             |
| Vial:             | CStk1-01:3           | Injection Volume(ul): | 1.00                             |

HRMS21111FEB03 #32-66 RT: 0.25-0.50 AV: 35 SB: 1 0.01 NL: 1.75E7  
T: FTMS + c ESI Full ms [100.00-750.00]

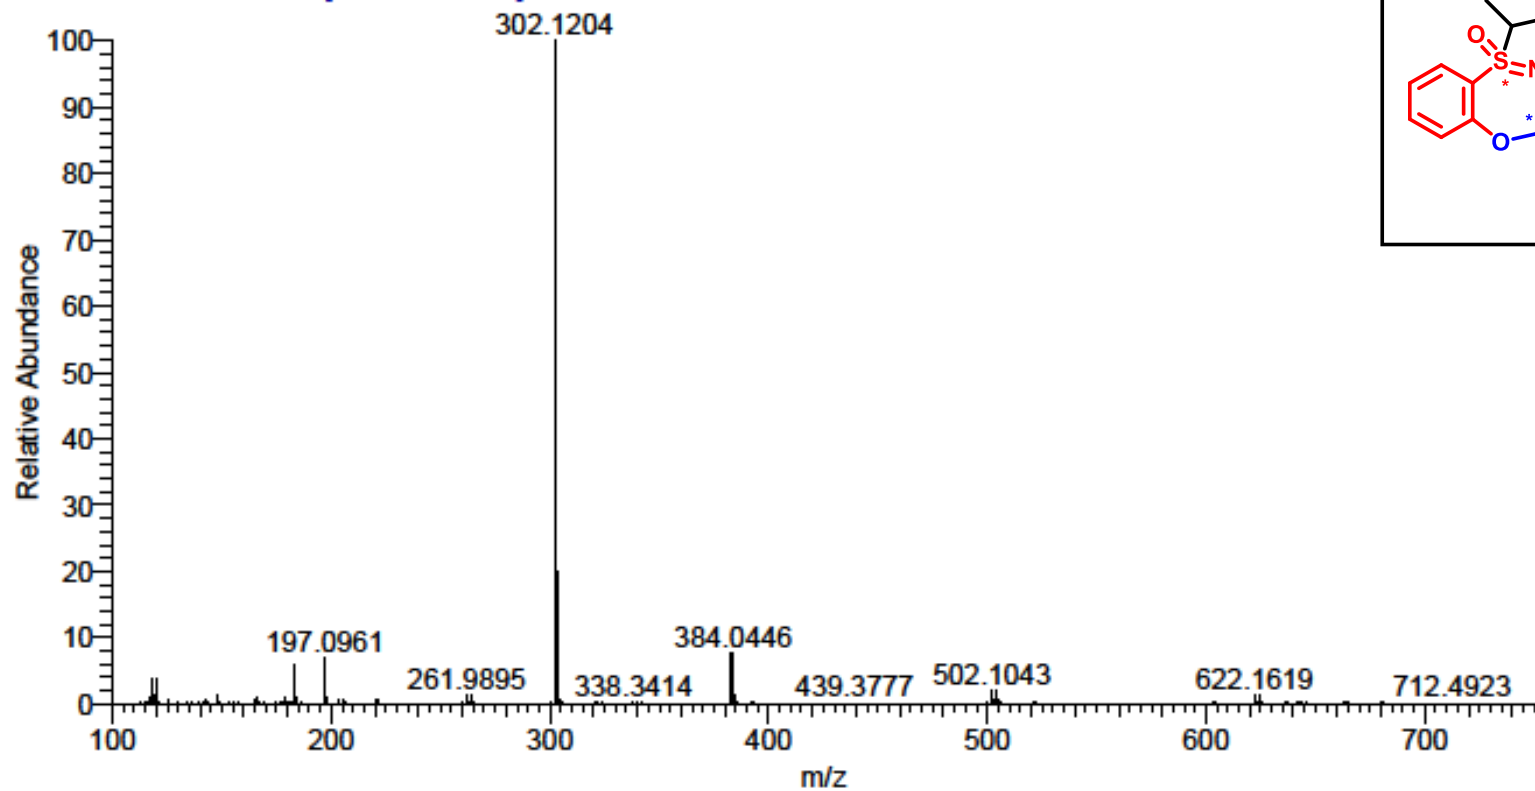

Fig S-42: HRMS report of Compound 4c'

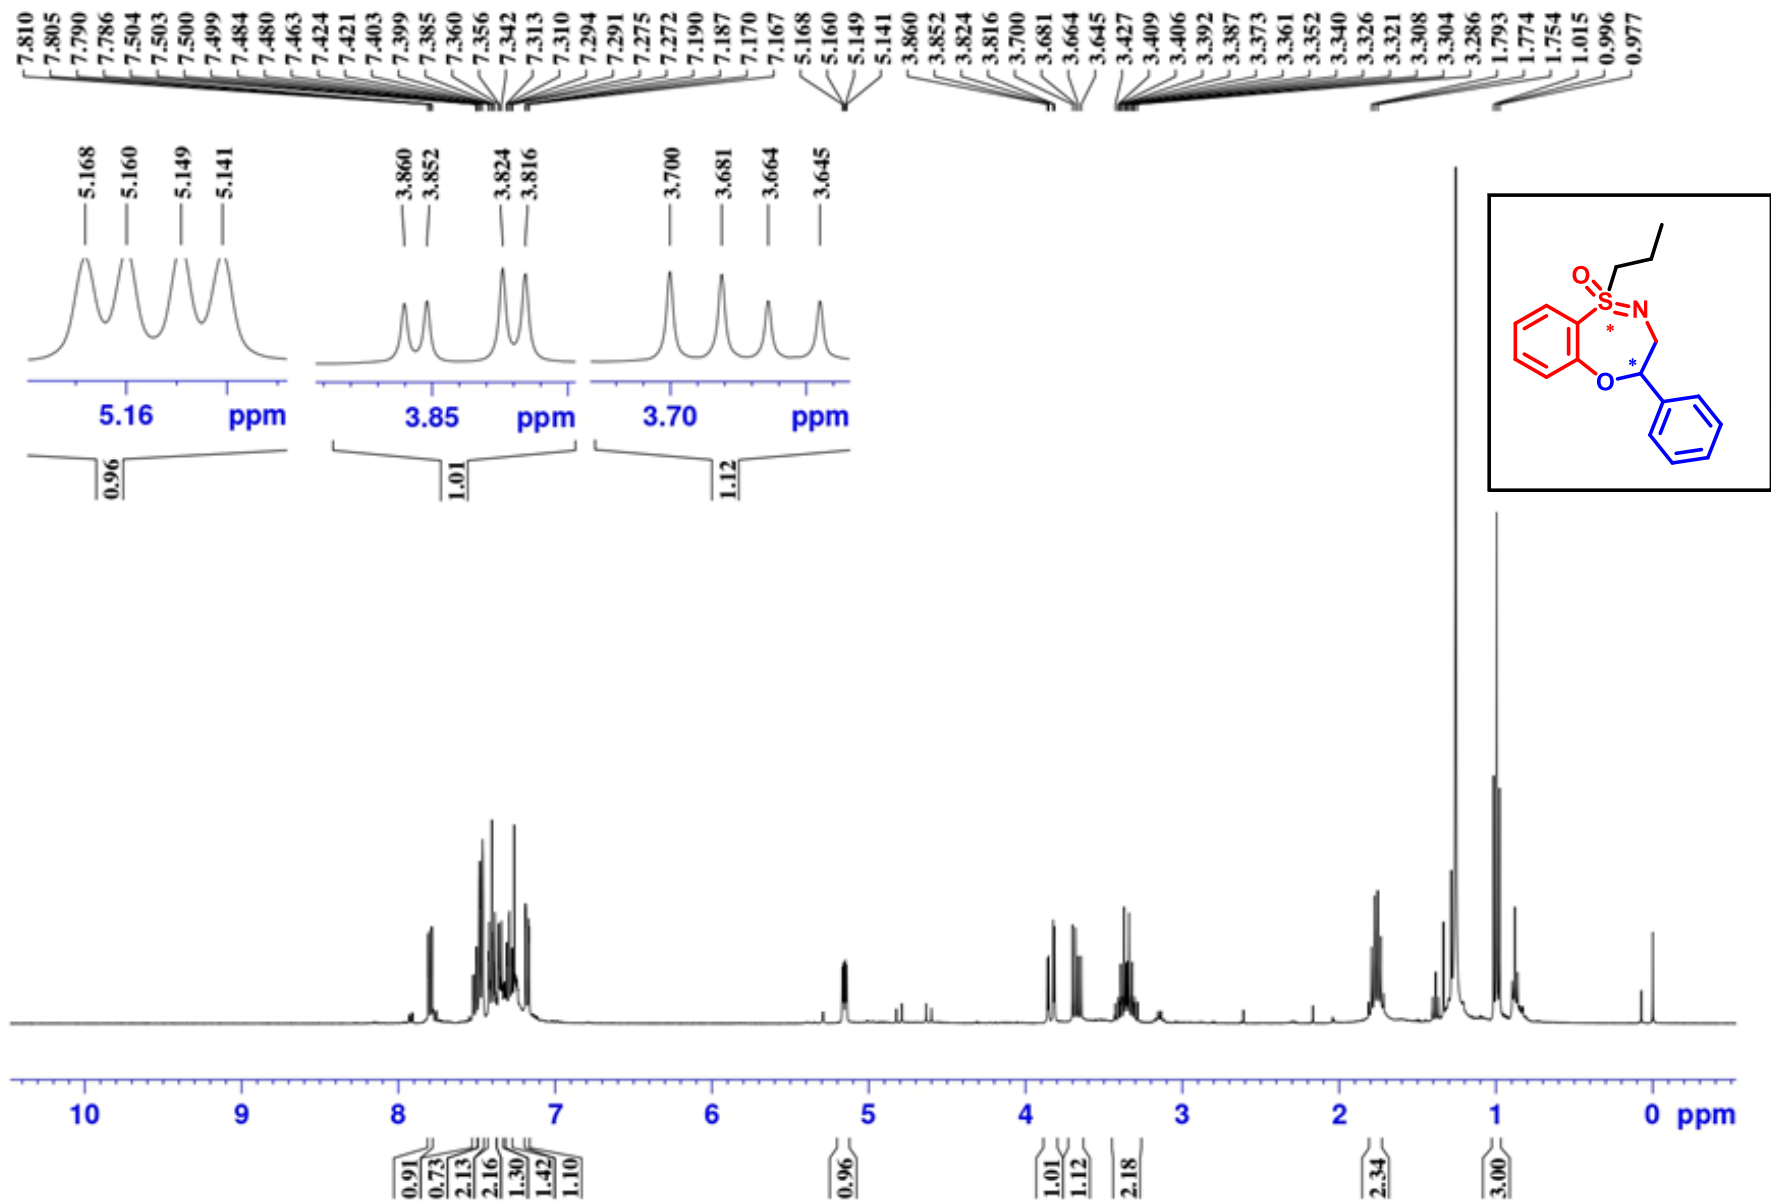

**Fig S-43:**  $^1\text{H}$  NMR Spectra of Compound **4d** (400 MHz,  $\text{CDCl}_3$ )



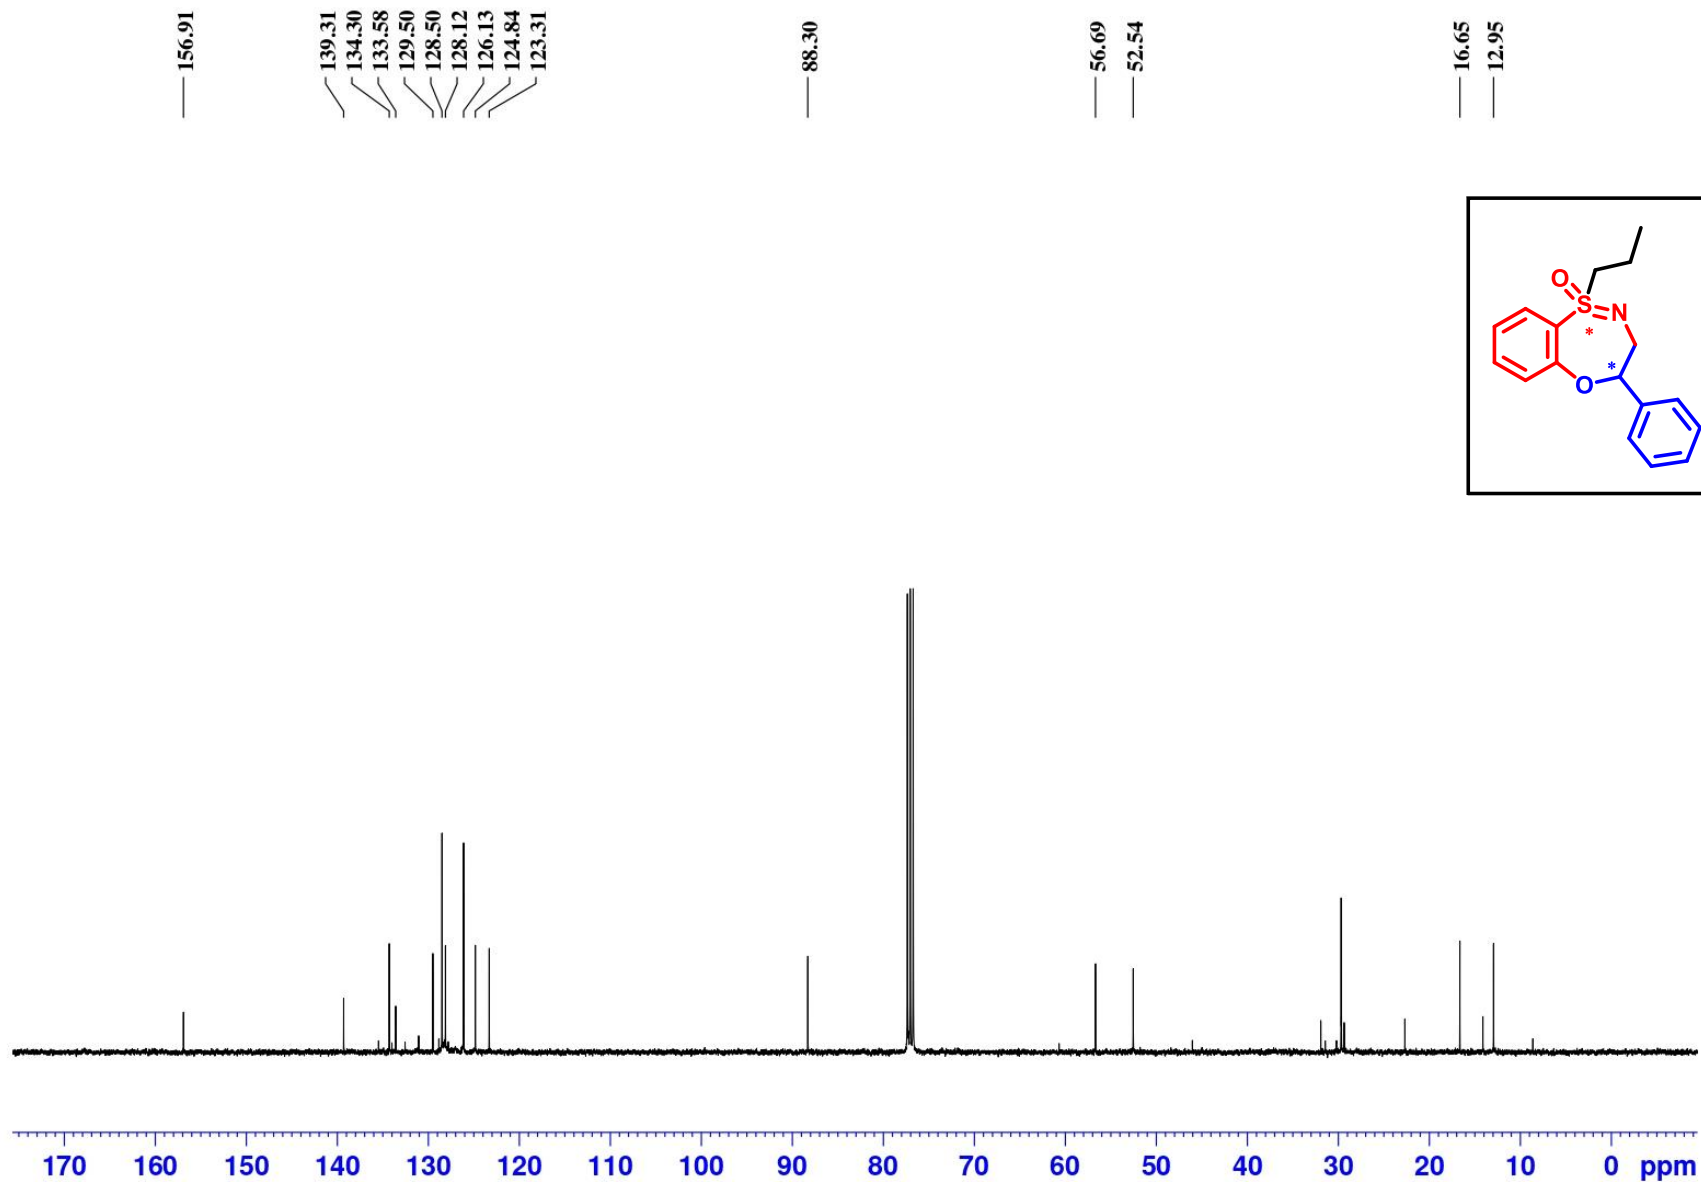

**Fig S-44:**  $^{13}\text{C}$  NMR Spectra of Compound 4d (100 MHz,  $\text{CDCl}_3$ )

## SAIF [HRMS Report]

|                   |                      |                       |                                  |
|-------------------|----------------------|-----------------------|----------------------------------|
| Data File:        | HRMS21I10FEB06       | Original Data Path:   | D:\INTERNAL NEW\2021\Feb<br>2021 |
| Sample ID:        | AB-151A              | Sample Name:          |                                  |
| Acquisition Date: | 02/10/21 10:58:14 AM | Run Time(min):        | 0.00                             |
| Vial:             | CStk1-01:6           | Injection Volume(μl): | 1.00                             |

HRMS21I10FEB06 #31-65 RT: 0.25-0.50 AV: 35 SB: 1 0.01 NL: 4.66E7  
T: FTMS + c ESI Full ms [100.00-750.00]

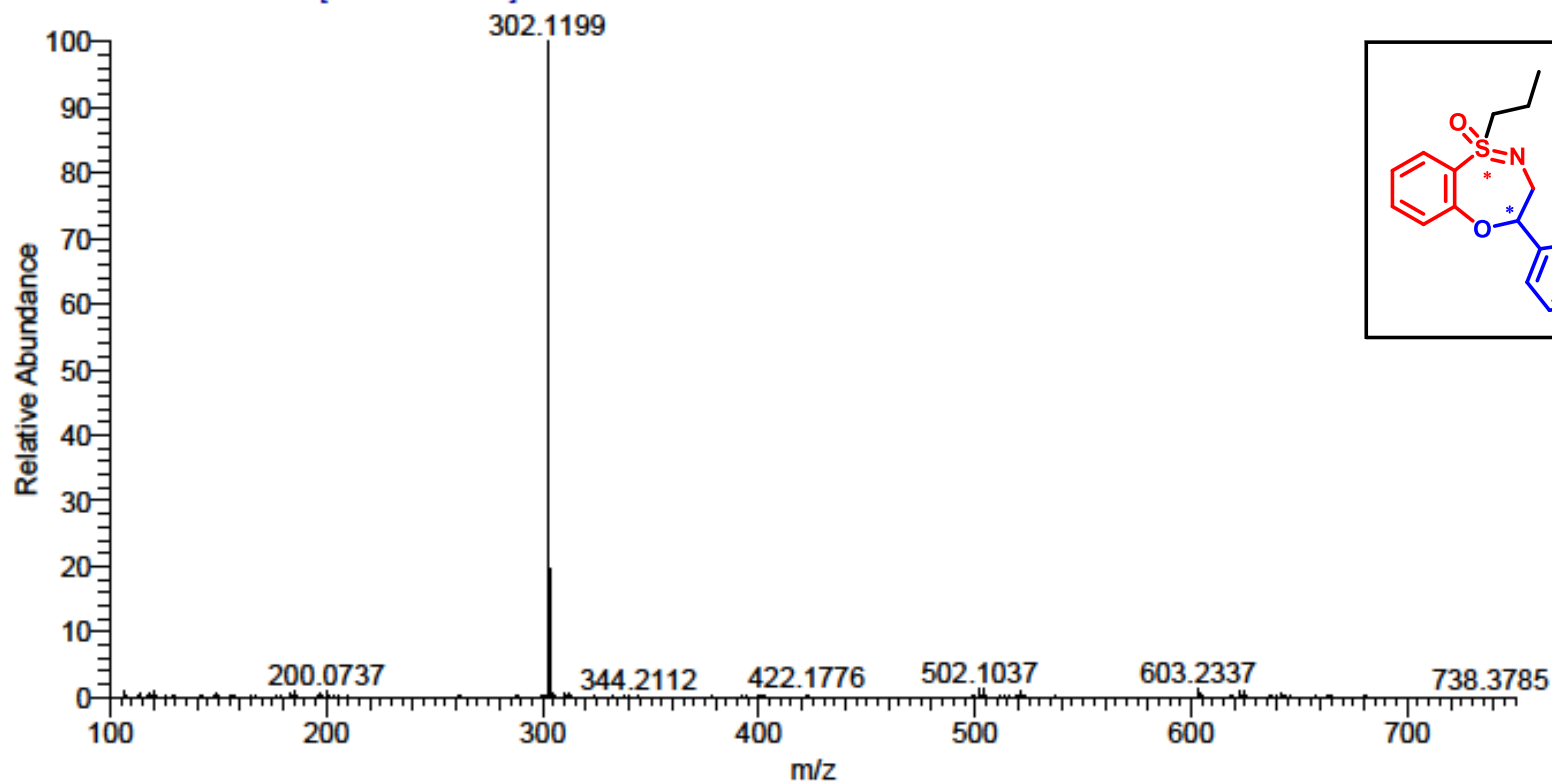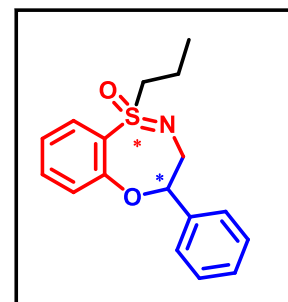

Fig S-45: HRMS report of Compound 4d

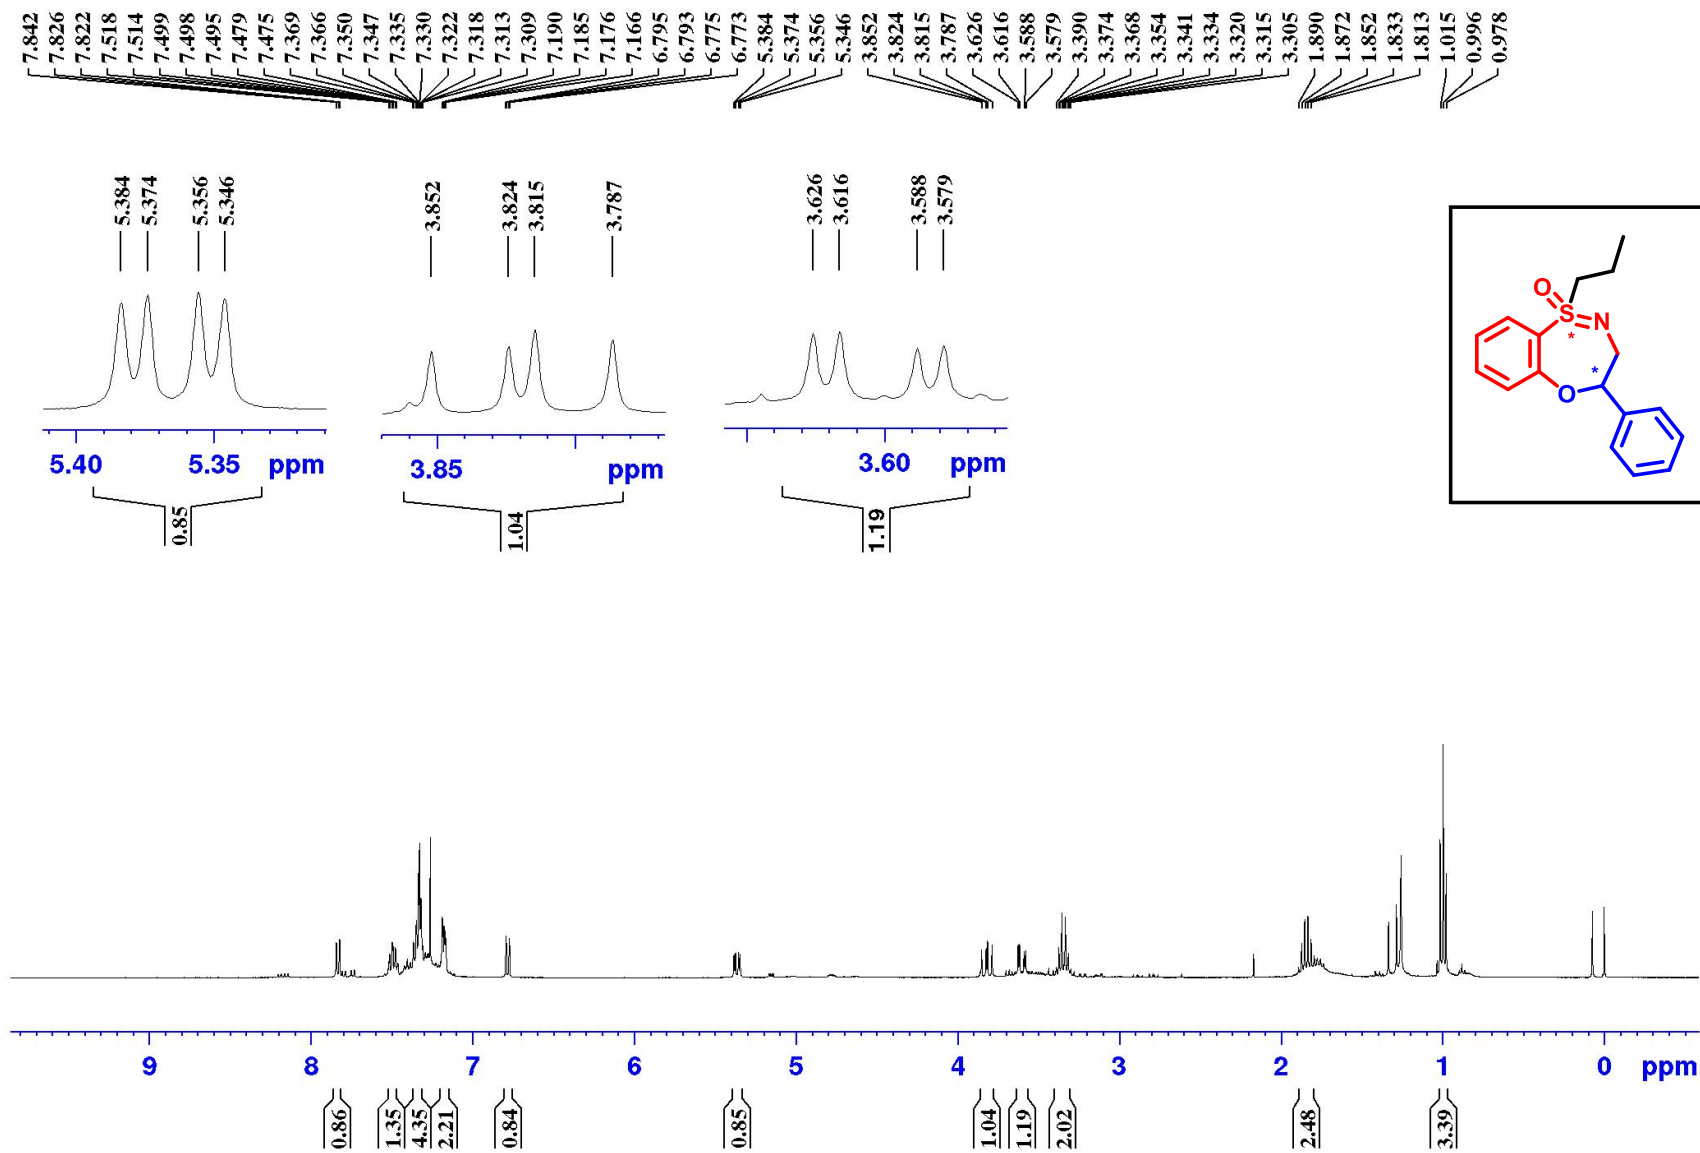

**Fig S-46:** <sup>1</sup>H NMR Spectra of Compound 4d' (400 MHz, CDCl<sub>3</sub>)

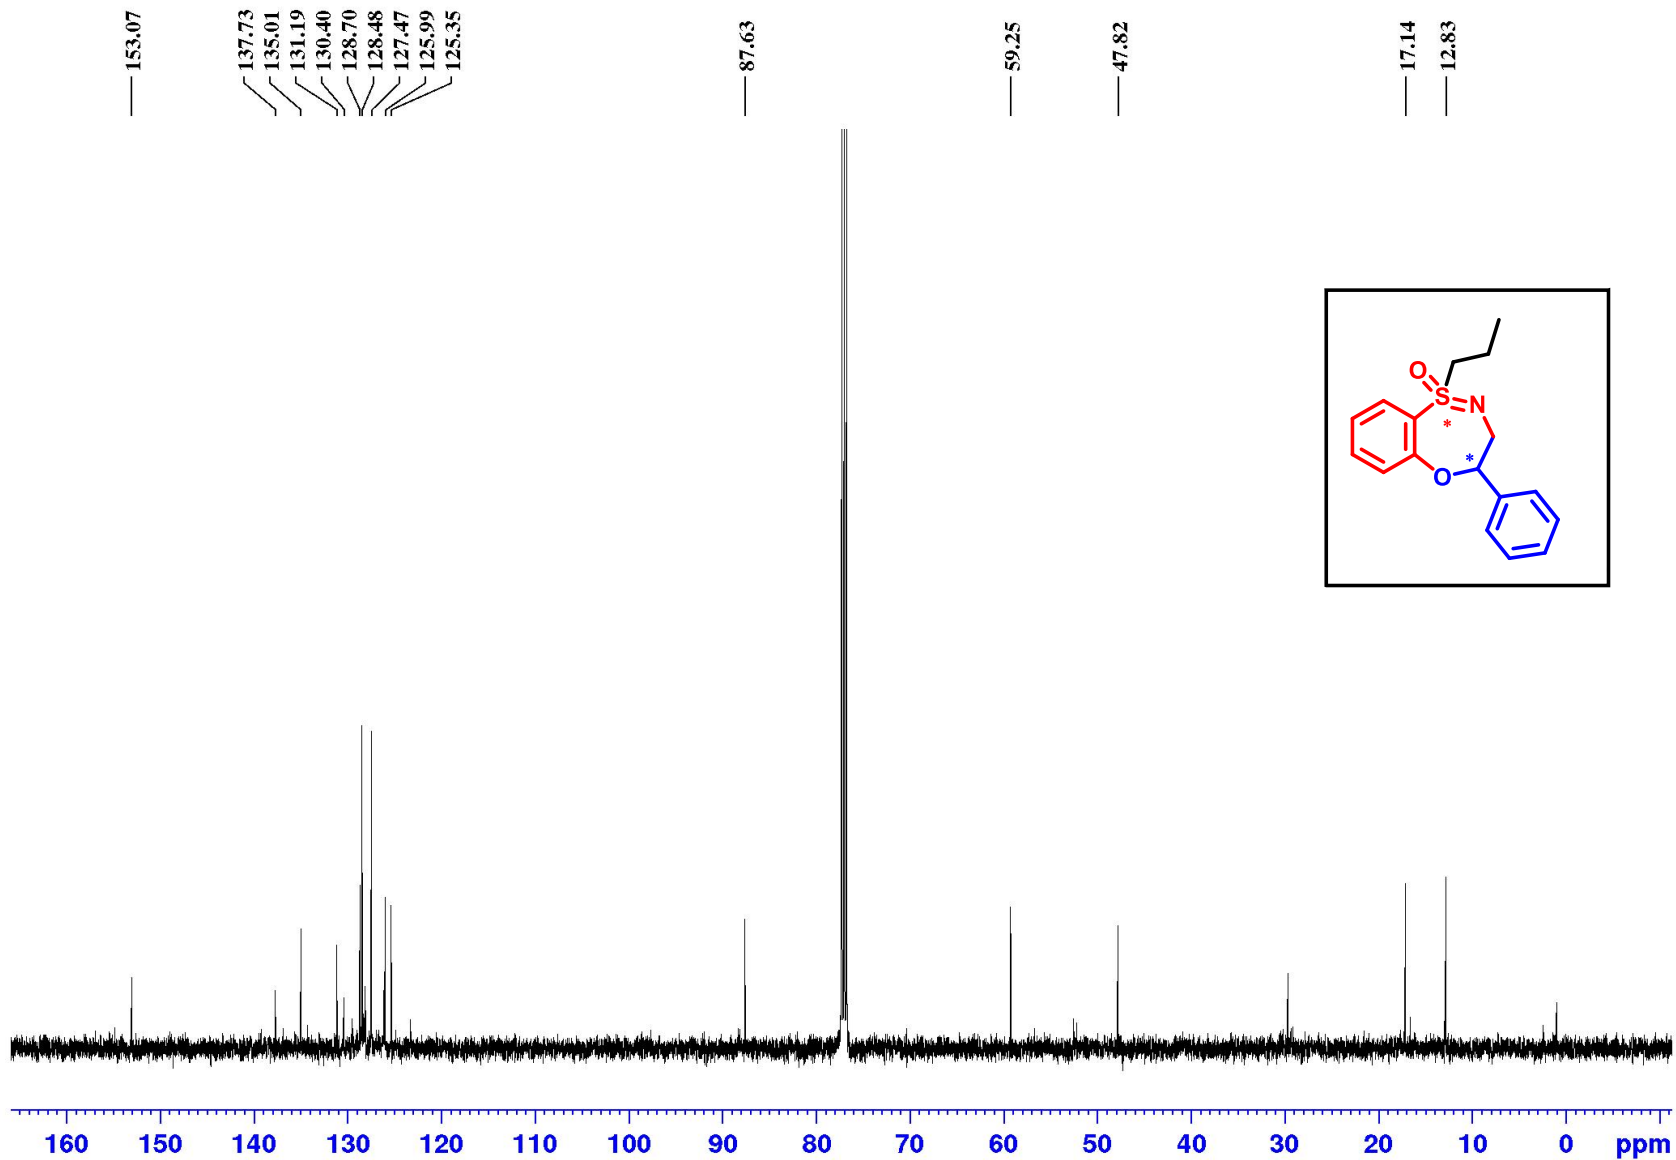

**Fig S-47:**  $^{13}\text{C}$  NMR Spectra of Compound 4d' (100 MHz, CDCl<sub>3</sub>).

# SAIF [HRMS Report]

|                   |                      |                       |                                  |
|-------------------|----------------------|-----------------------|----------------------------------|
| Data File:        | HRMS21I10FEB07       | Original Data Path:   | D:\INTERNAL NEW\2021\Feb<br>2021 |
| Sample ID:        | AB-151B              | Sample Name:          |                                  |
| Acquisition Date: | 02/10/21 11:00:13 AM | Run Time(min):        | 0.00                             |
| Vial:             | CStk1-01:7           | Injection Volume(μl): | 1.00                             |

HRMS21I10FEB07 #31-64 RT: 0.25-0.50 AV: 34 SB: 1 0.01 NL: 2.87E7  
T: FTMS + c ESI Full ms [100.00-750.00]

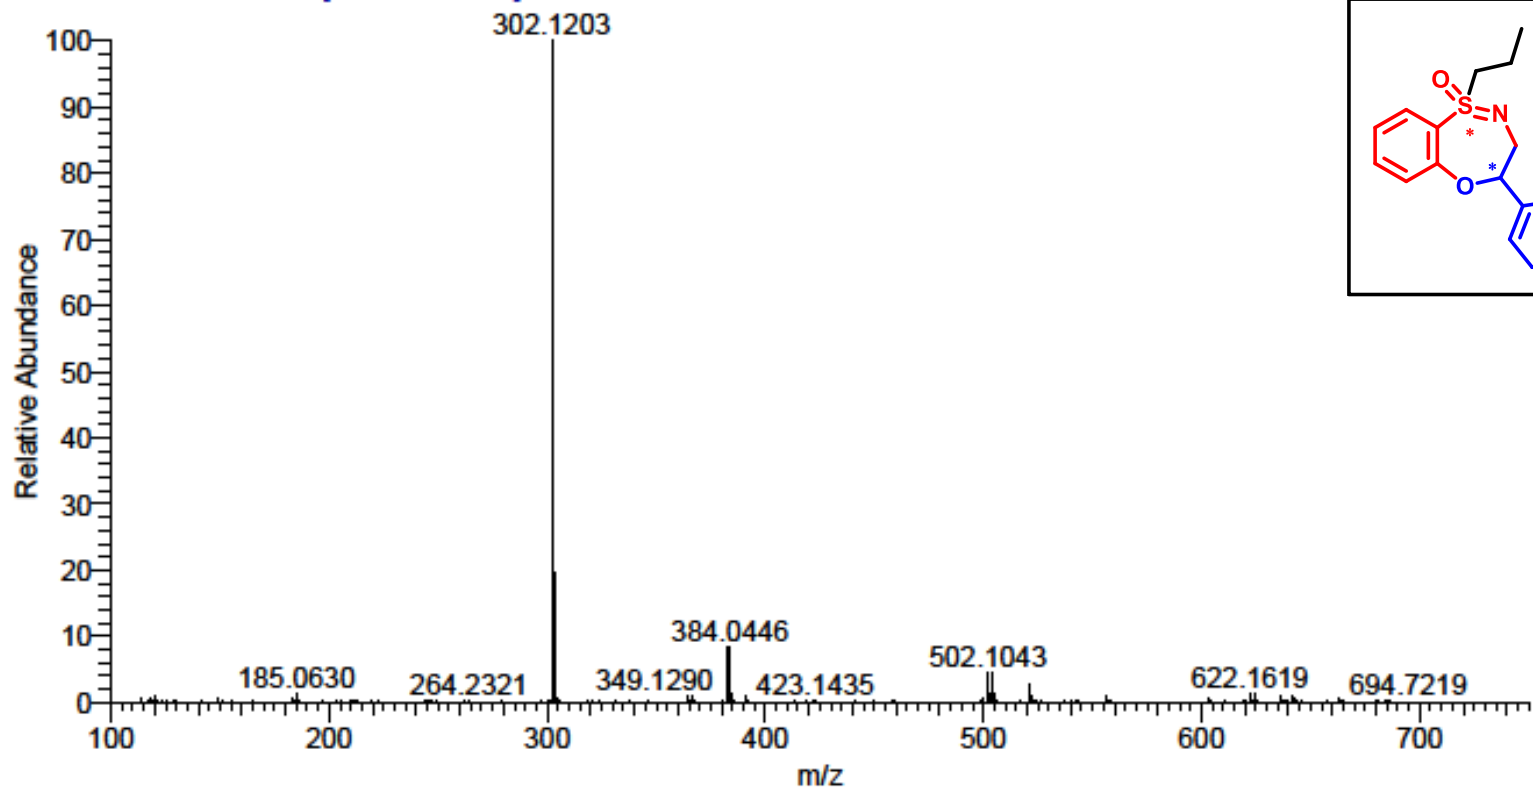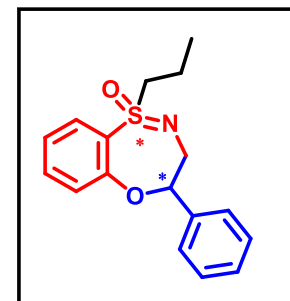

Fig S-48: HRMS report of Compound 4d' (400 MHz, CDCl<sub>3</sub>)

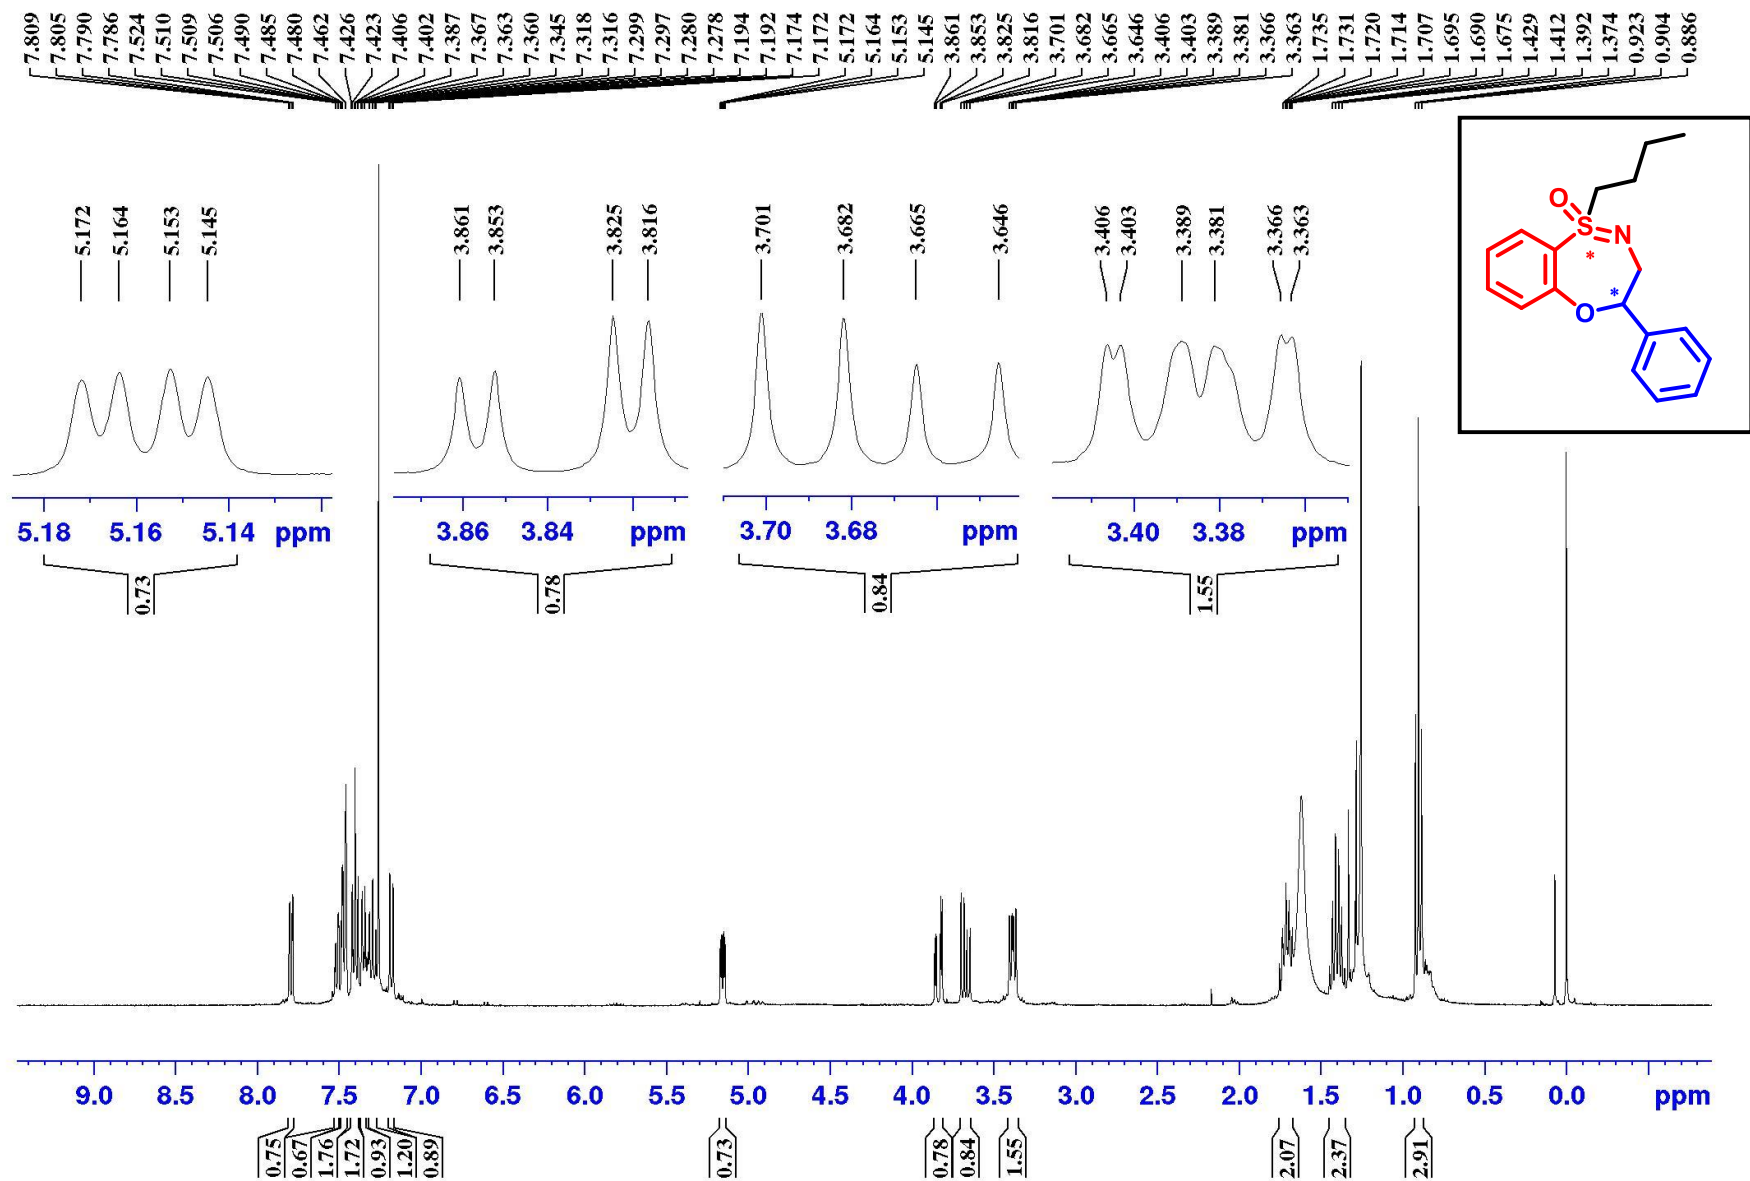

**Fig S-49:**  $^1\text{H}$  NMR Spectra of Compound **4e** (400 MHz,  $\text{CDCl}_3$ )

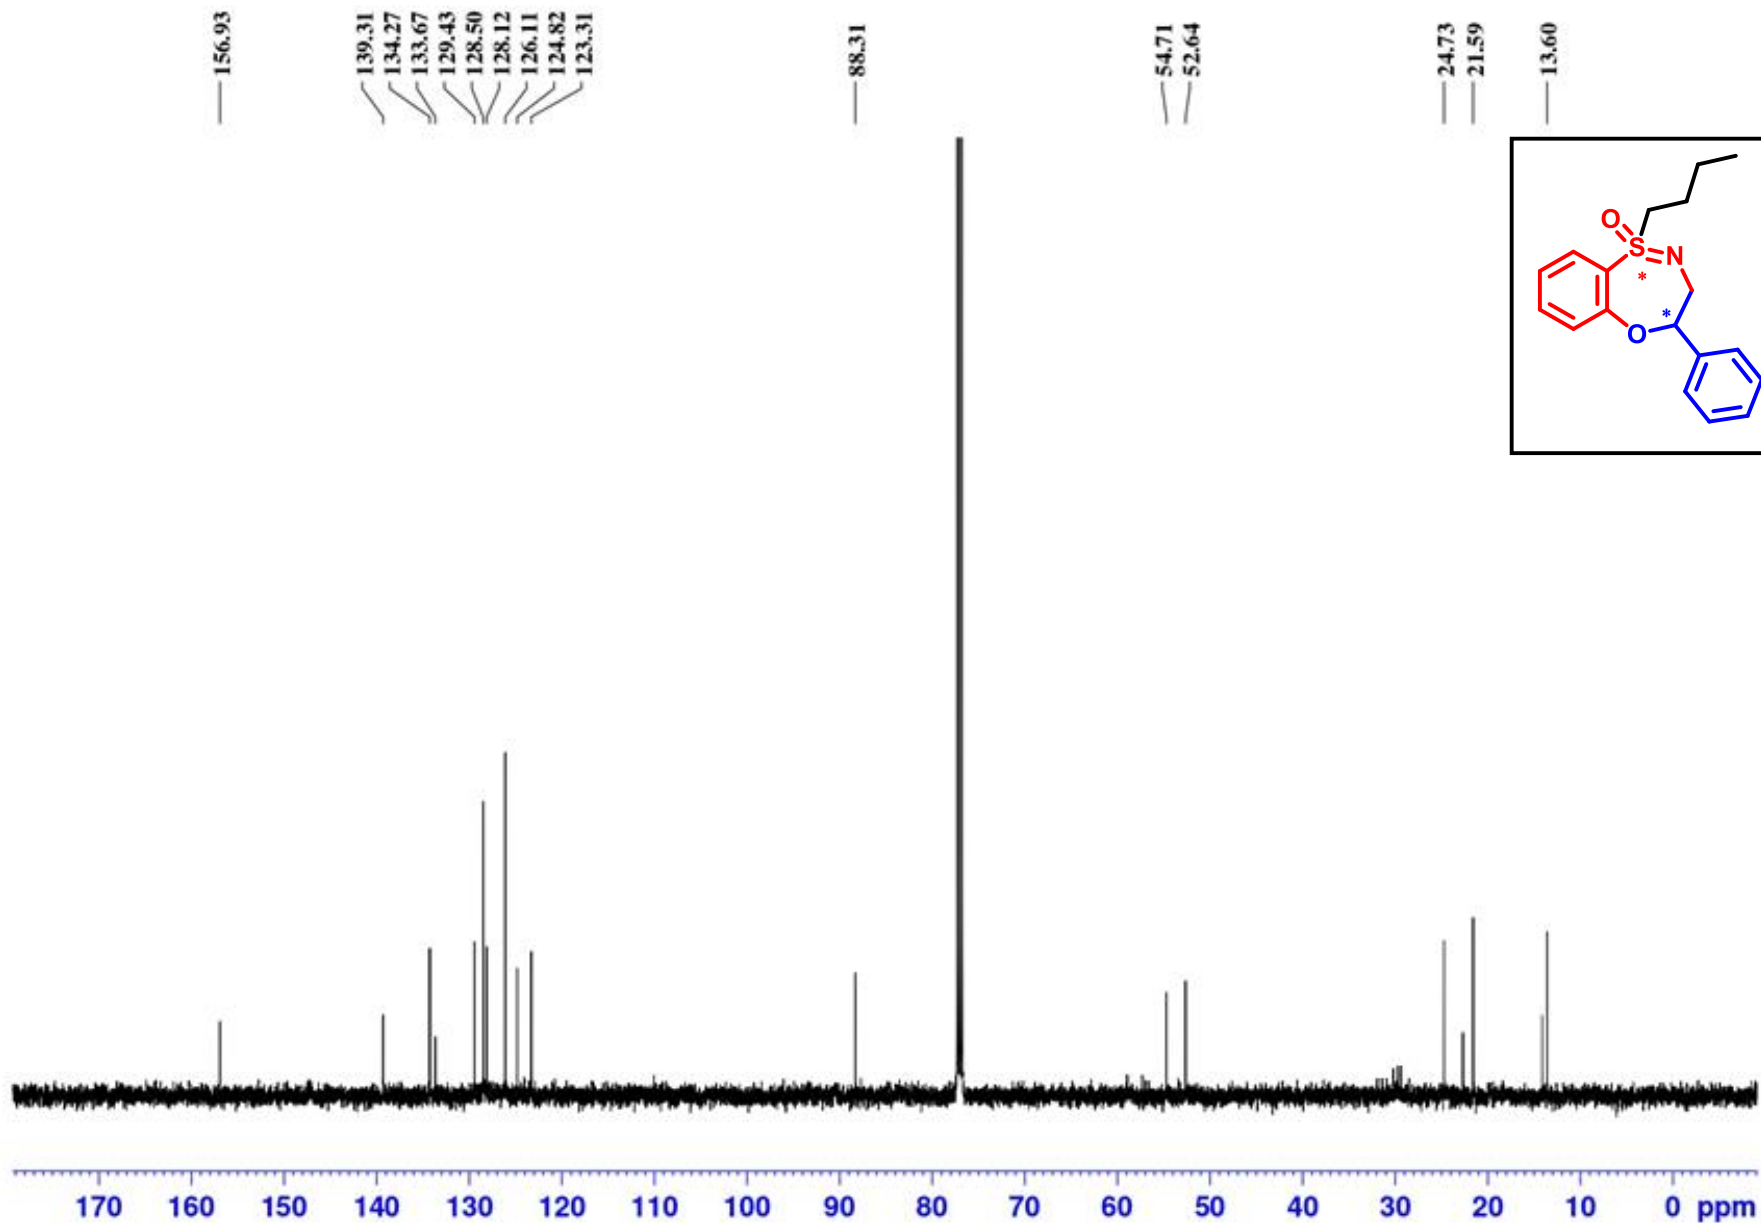

**Fig S-50:**  $^{13}\text{C}$  NMR Spectra of Compound 4e (100 MHz,  $\text{CDCl}_3$ )

## SAIF [HRMS Report]

|                   |                      |                             |                                  |
|-------------------|----------------------|-----------------------------|----------------------------------|
| Data File:        | HRMS21110FEB08       | Original Data Path:         | D:\INTERNAL NEW\2021\Feb<br>2021 |
| Sample ID:        | AB-152A              | Sample Name:                |                                  |
| Acquisition Date: | 02/10/21 11:02:11 AM | Run Time(min):              | 0.00                             |
| Vial:             | CStk1-01:8           | Injection Volume( $\mu$ l): | 1.00                             |

HRMS21110FEB08 #30-64 RT: 0.25-0.50 AV: 35 SB: 1 0.01 NL: 2.76E7  
T: FTMS + c ESI Full ms [100.00-750.00]

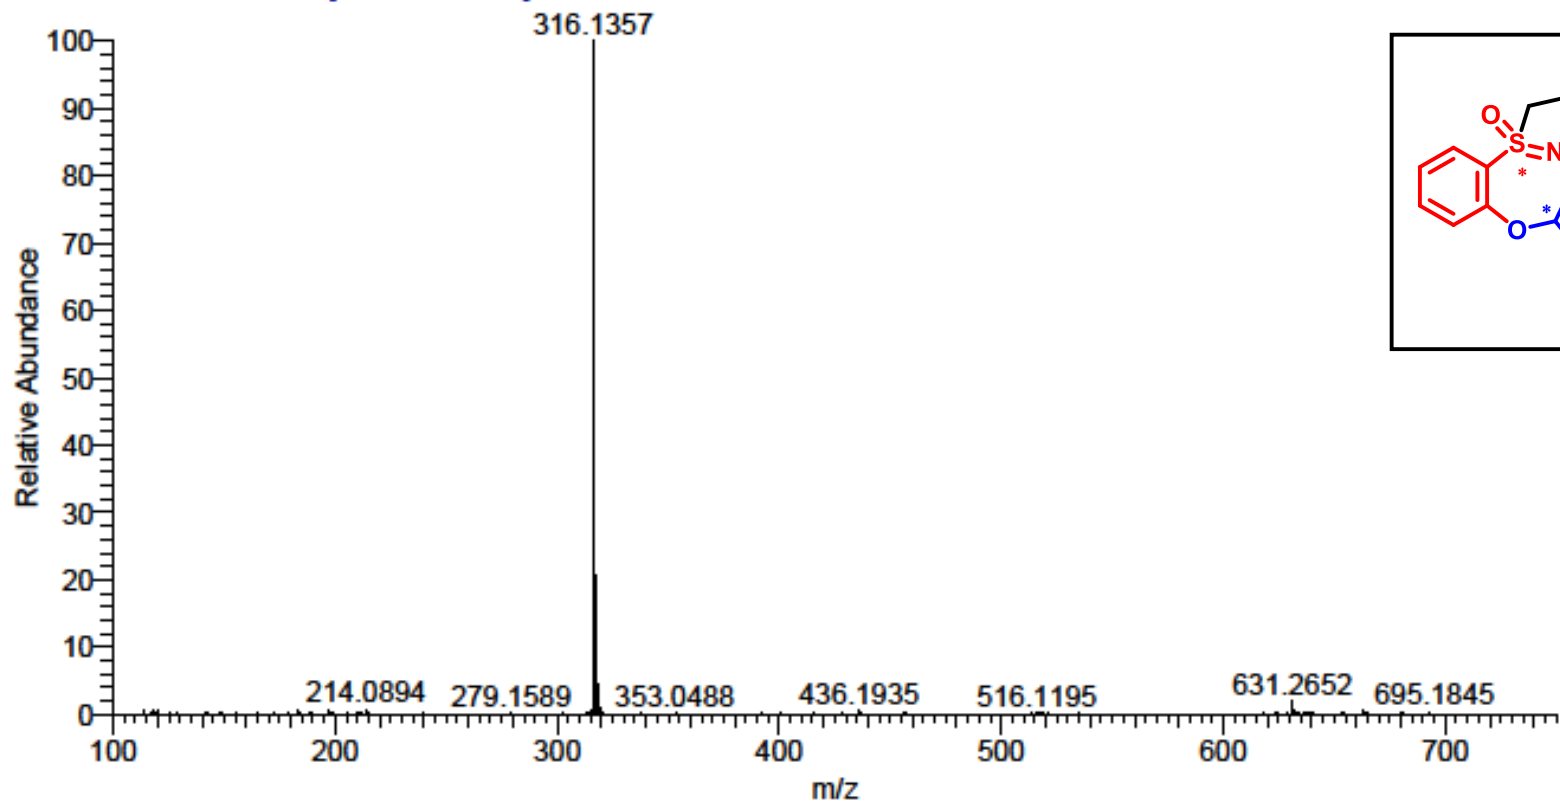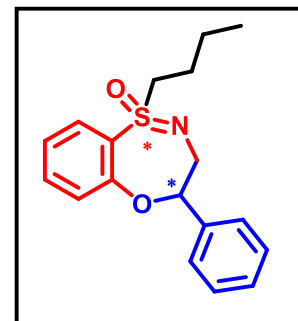

Fig S-51: HRMS report of Compound 4e



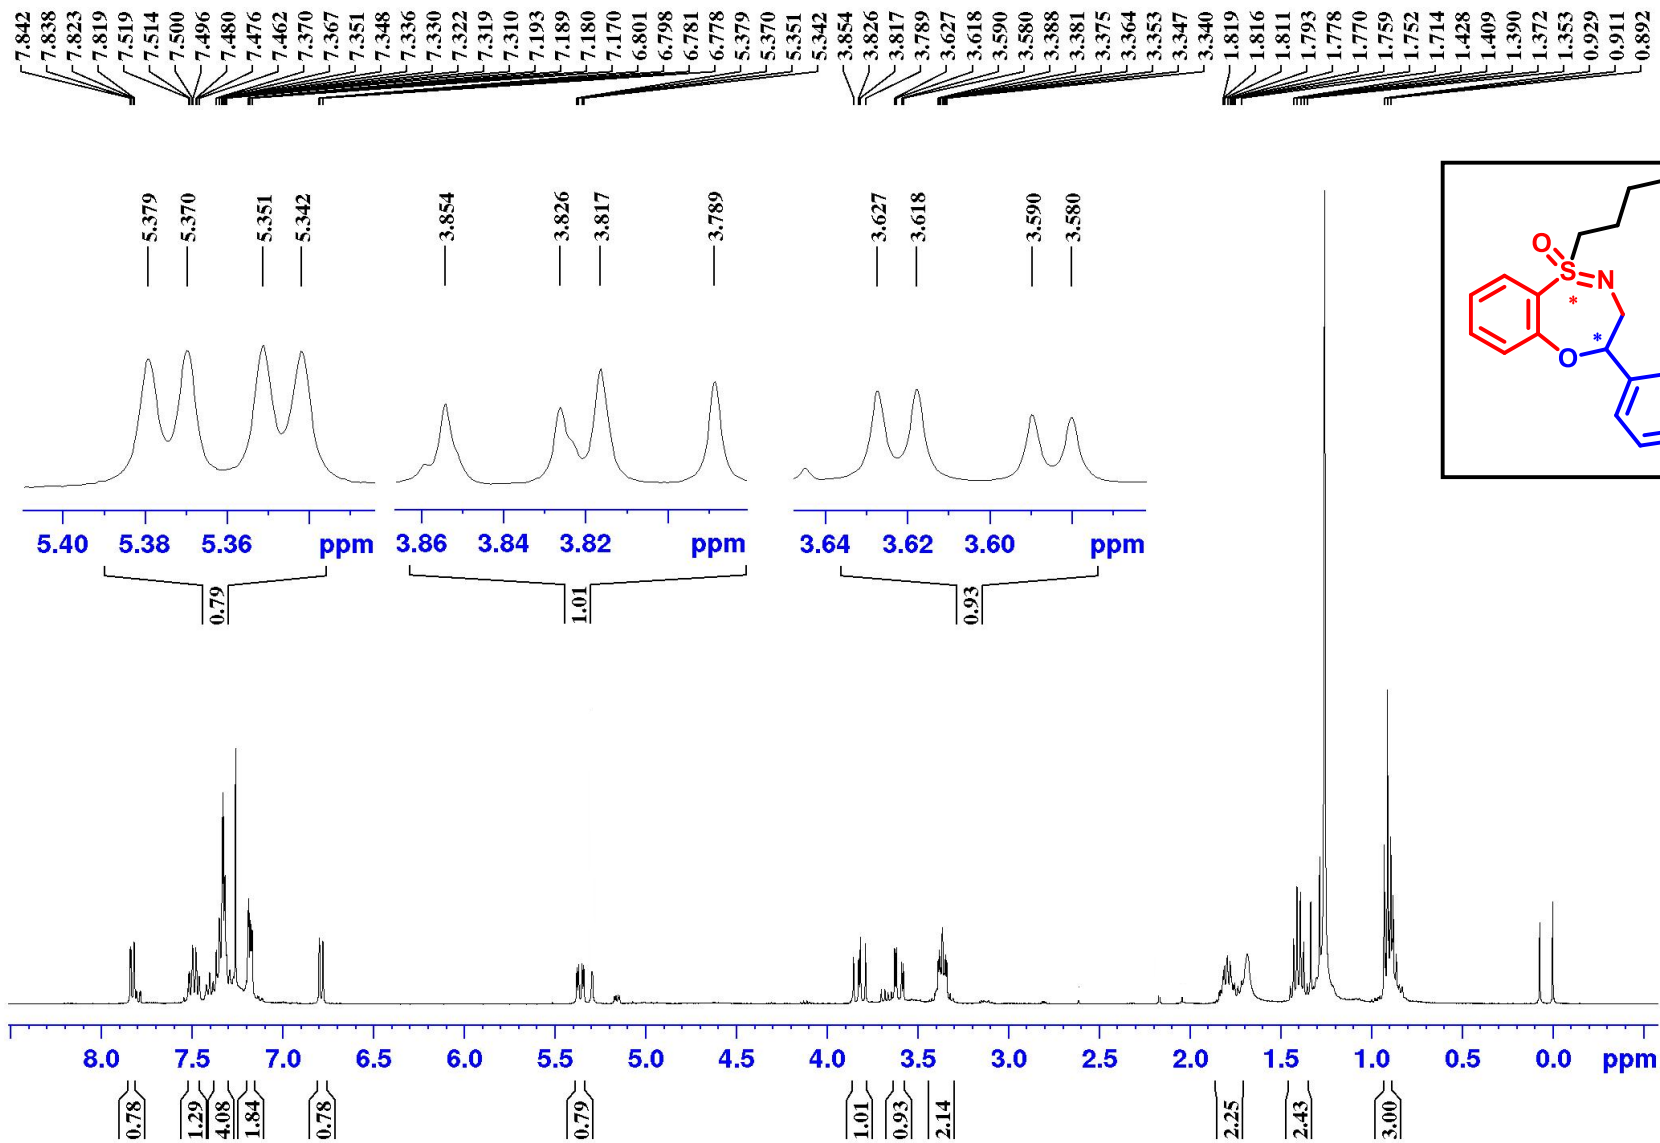

**Fig S-52:** <sup>1</sup>H NMR Spectra of Compound 4e' (400 MHz, CDCl<sub>3</sub>)

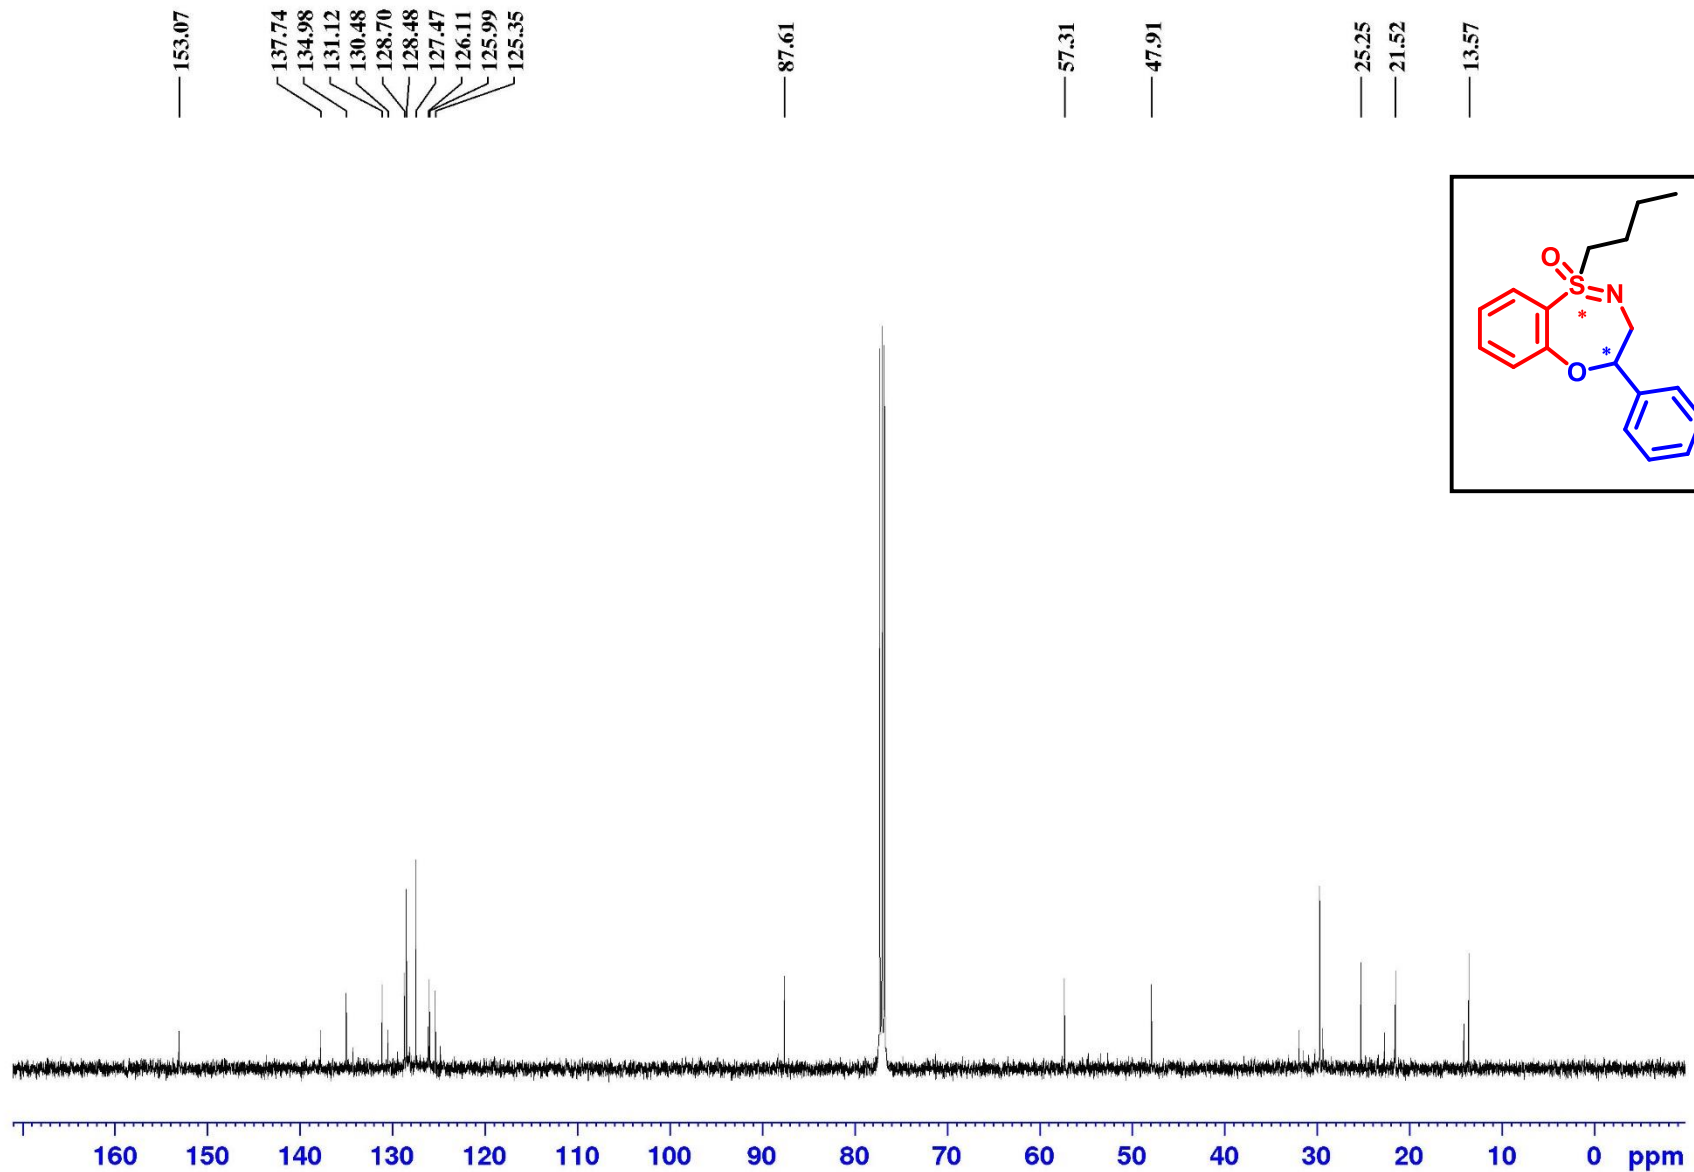

**Fig S-53:**  $^{13}\text{C}$  NMR Spectra of Compound **4e'** (100 MHz,  $\text{CDCl}_3$ )

## SAIF [HRMS Report]

|                   |                      |                       |                                  |
|-------------------|----------------------|-----------------------|----------------------------------|
| Data File:        | HRMS21110FEB09       | Original Data Path:   | D:\INTERNAL NEW\2021\Feb<br>2021 |
| Sample ID:        | AB-152B              | Sample Name:          |                                  |
| Acquisition Date: | 02/10/21 11:04:10 AM | Run Time(min):        | 0.00                             |
| Vial:             | CS&k1-01:9           | Injection Volume(μl): | 1.00                             |

HRMS21110FEB09 #30-64 RT: 0.25-0.50 AV: 35 SB: 1 0.01 NL: 3.23E7  
T: FTMS + c ESI Full ms [100.00-750.00]

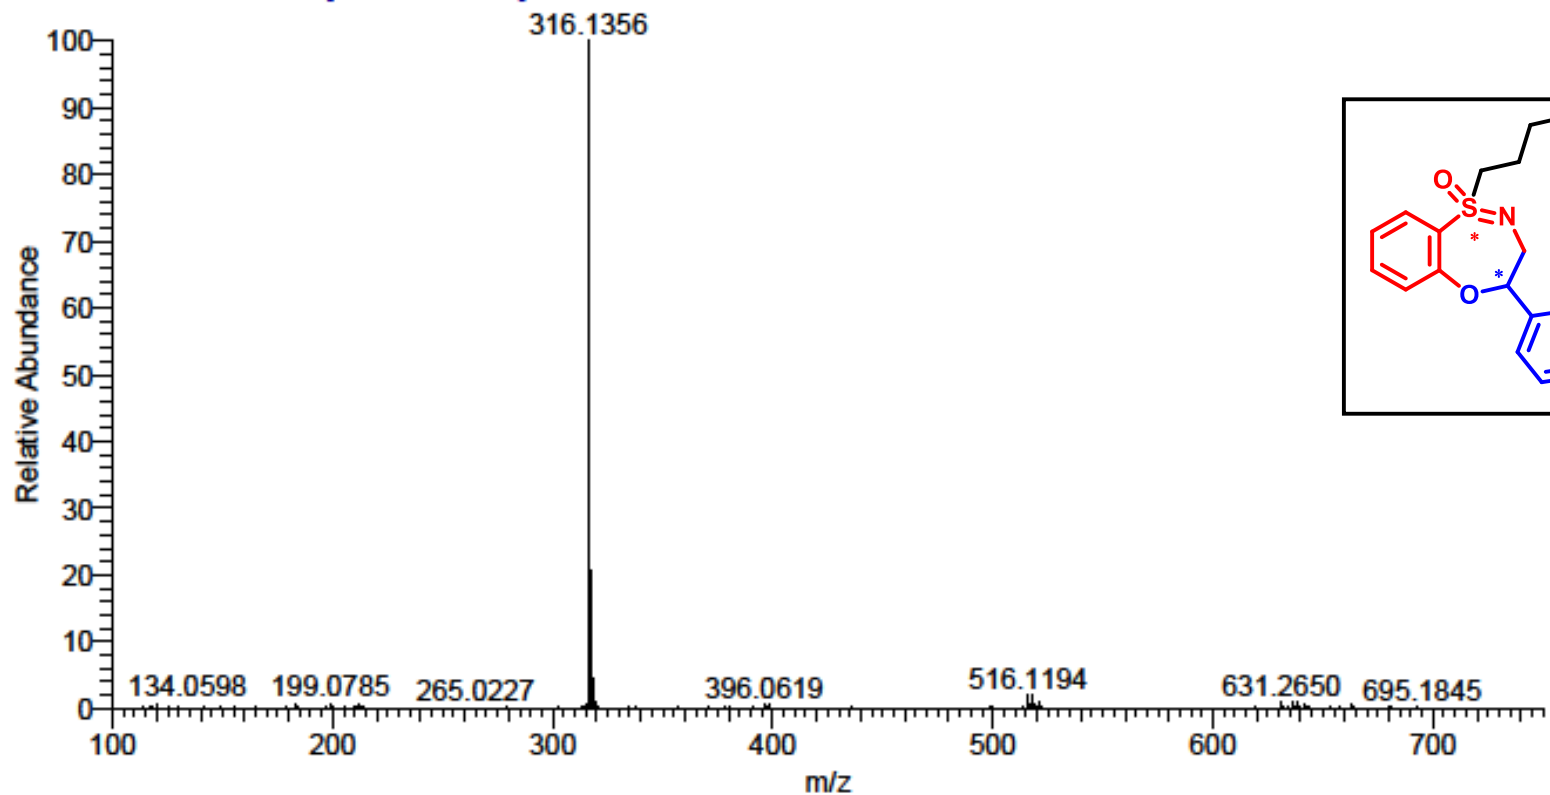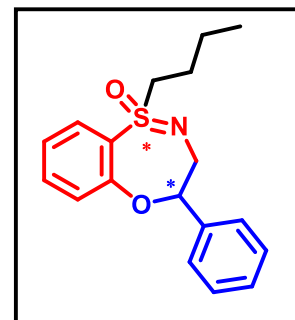

Fig S-54: HRMS report of Compound 4e'

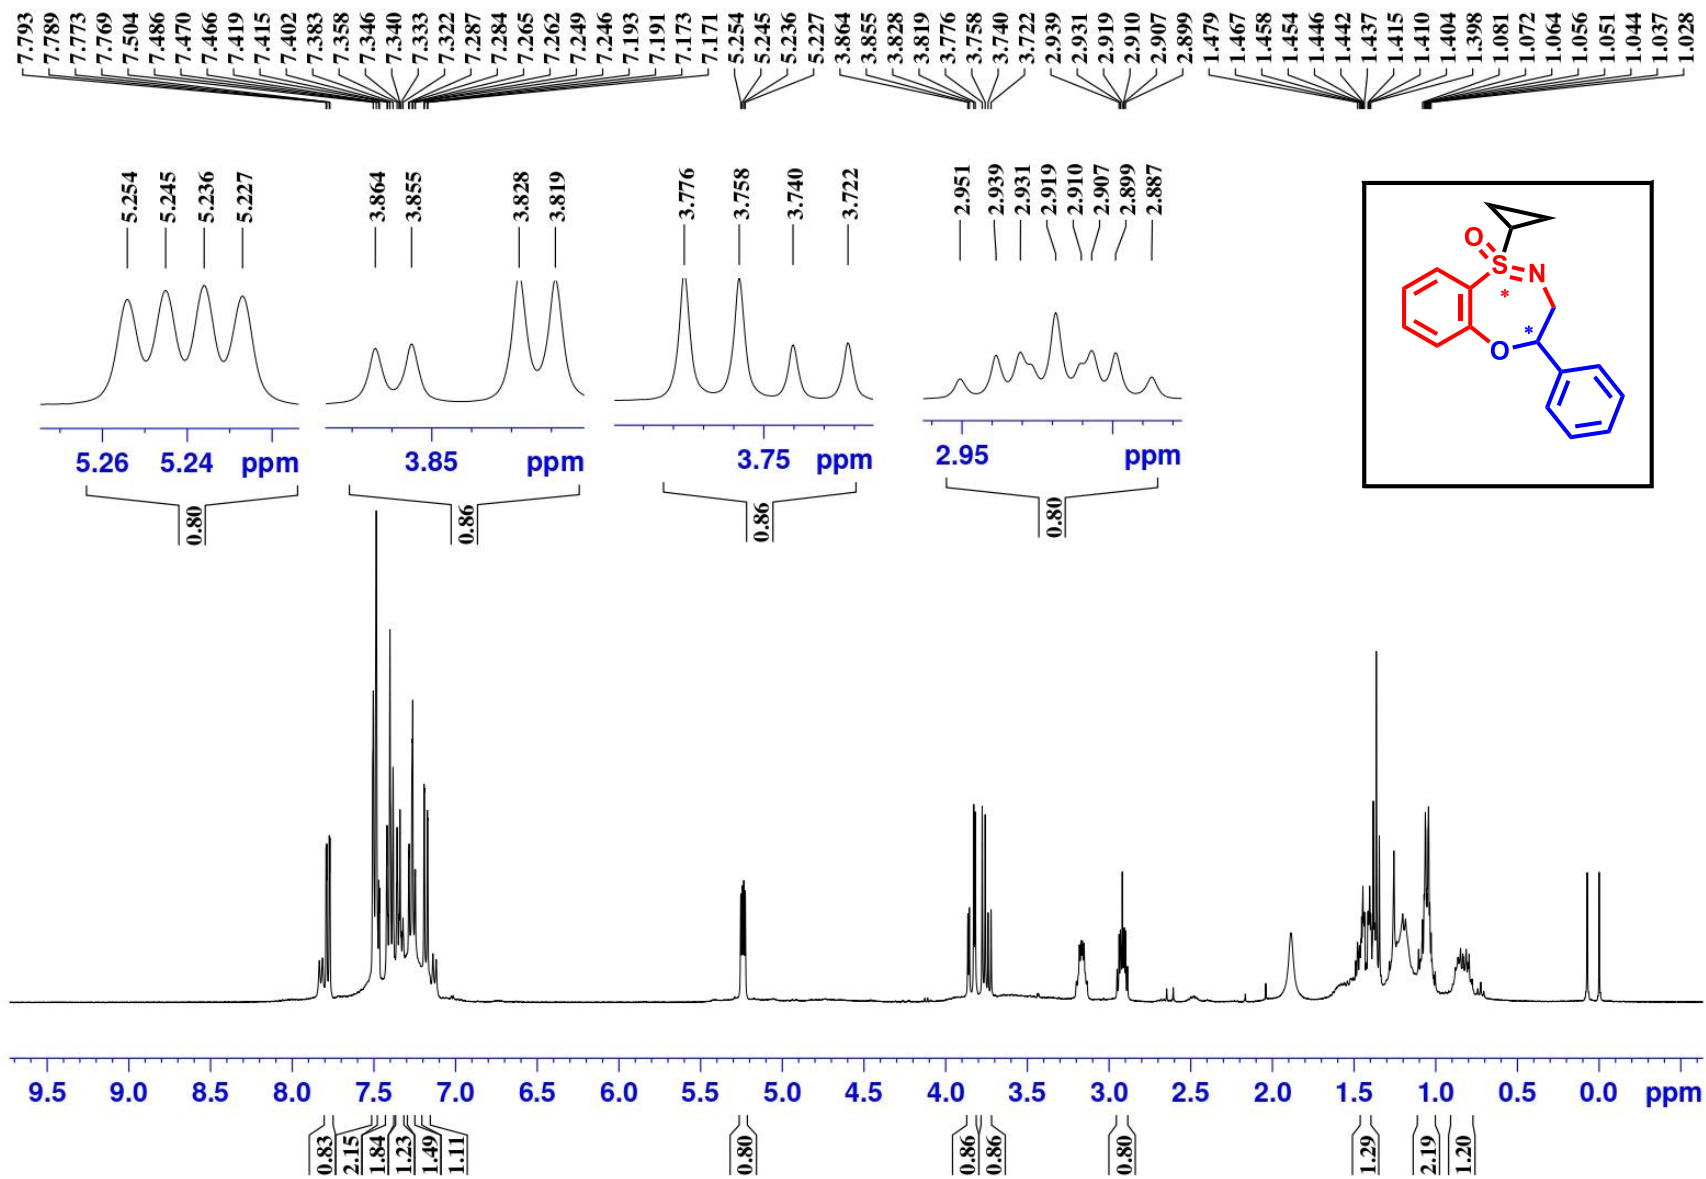

**Fig S-55:**  $^1\text{H}$  NMR Spectra of Compound **4f** (400 MHz,  $\text{CDCl}_3$ )

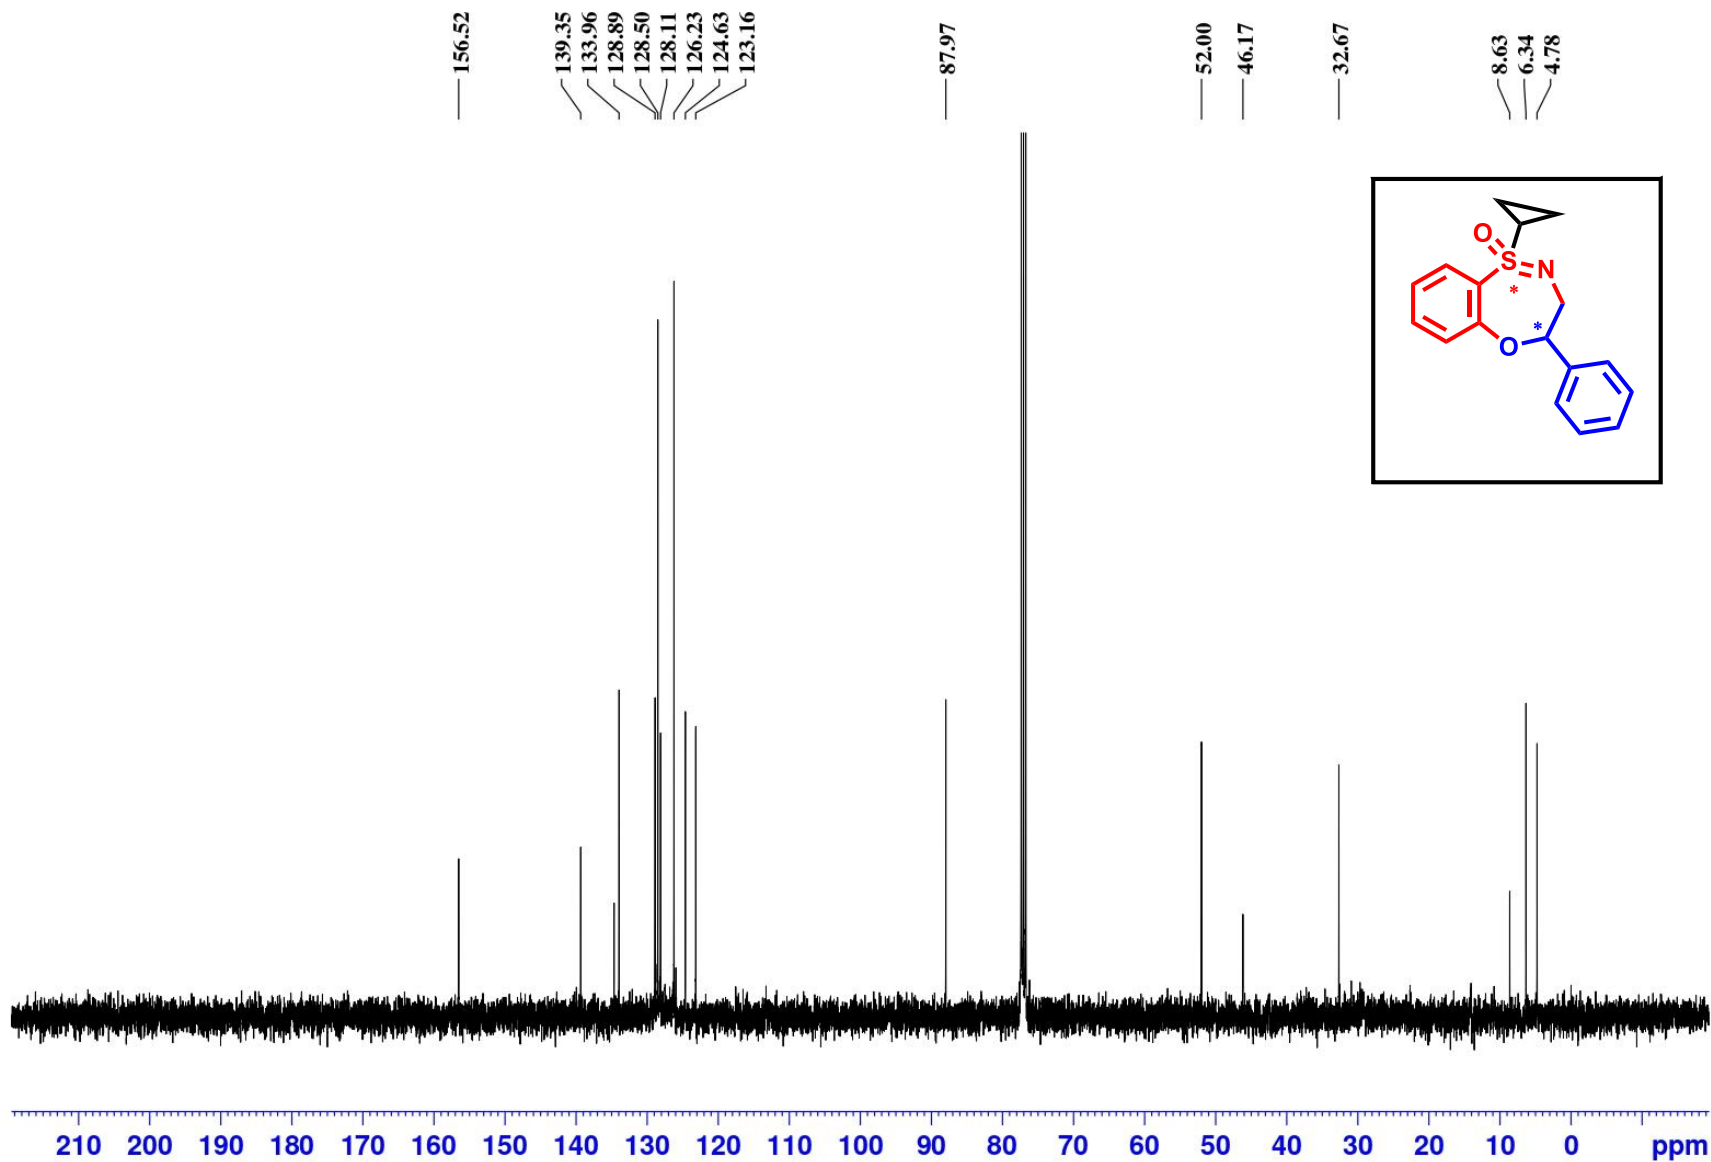

**Fig S-56:**  $^{13}\text{C}$  NMR Spectra of Compound **4f** (100 MHz,  $\text{CDCl}_3$ )

## SAIF [HRMS Report]

|                   |                      |                       |                                  |
|-------------------|----------------------|-----------------------|----------------------------------|
| Data File:        | HRMS21I22FEB15       | Original Data Path:   | D:\INTERNAL NEW\2021\Feb<br>2021 |
| Sample ID:        | AB-157A              | Sample Name:          |                                  |
| Acquisition Date: | 02/22/21 11:41:52 AM | Run Time(min):        | 0.00                             |
| Vial:             | CStk1-01:15          | Injection Volume(μl): | 1.00                             |

HRMS21I22FEB15 #30-62 RT: 0.25-0.50 AV: 33 SB: 1 0.01 NL: 6.63E6  
T: FTMS + c ESI Full ms [100.00-750.00]

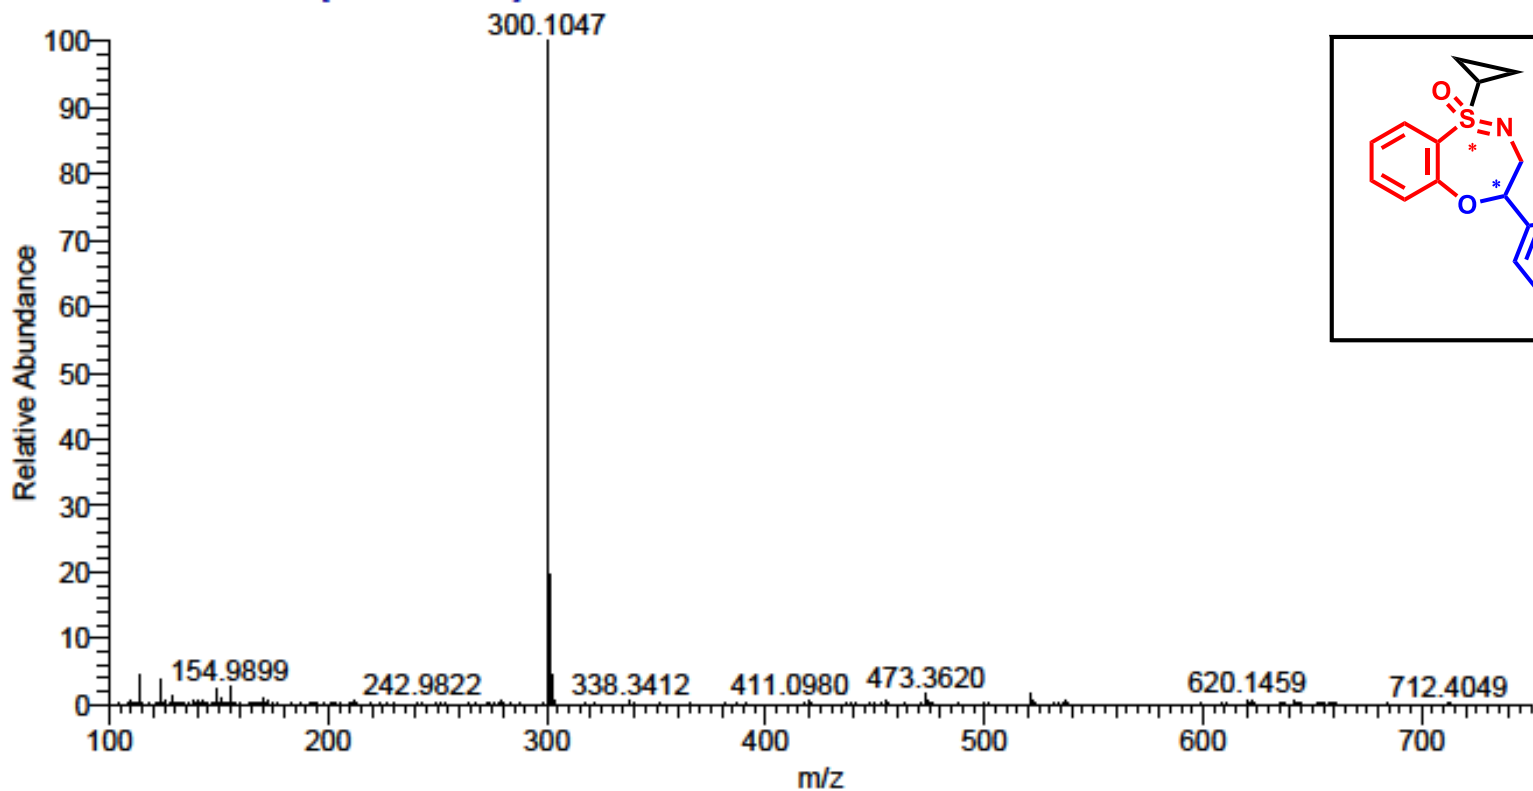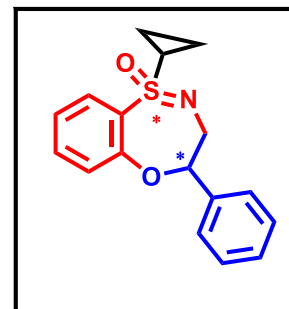

Fig S-57: HRMS report of Compound 4f

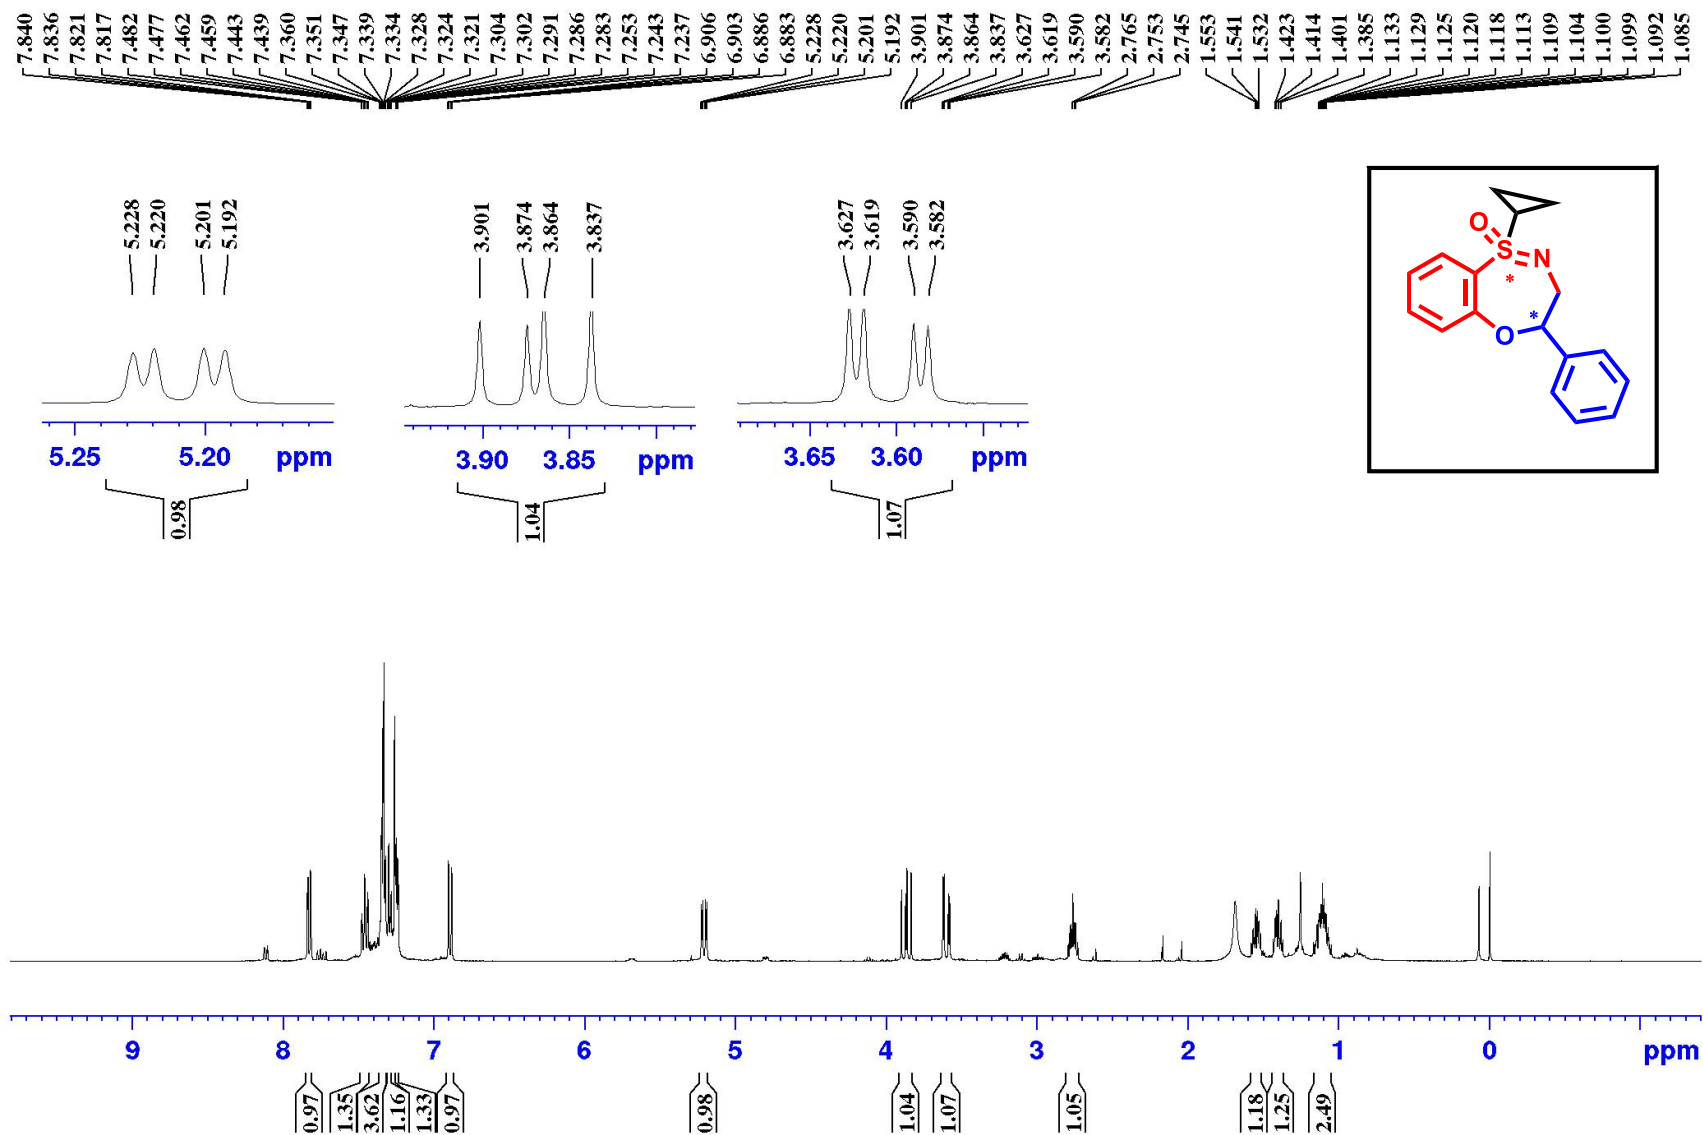

**Fig S-58:** <sup>1</sup>H NMR Spectra of Compound 4f' (400 MHz, CDCl<sub>3</sub>)

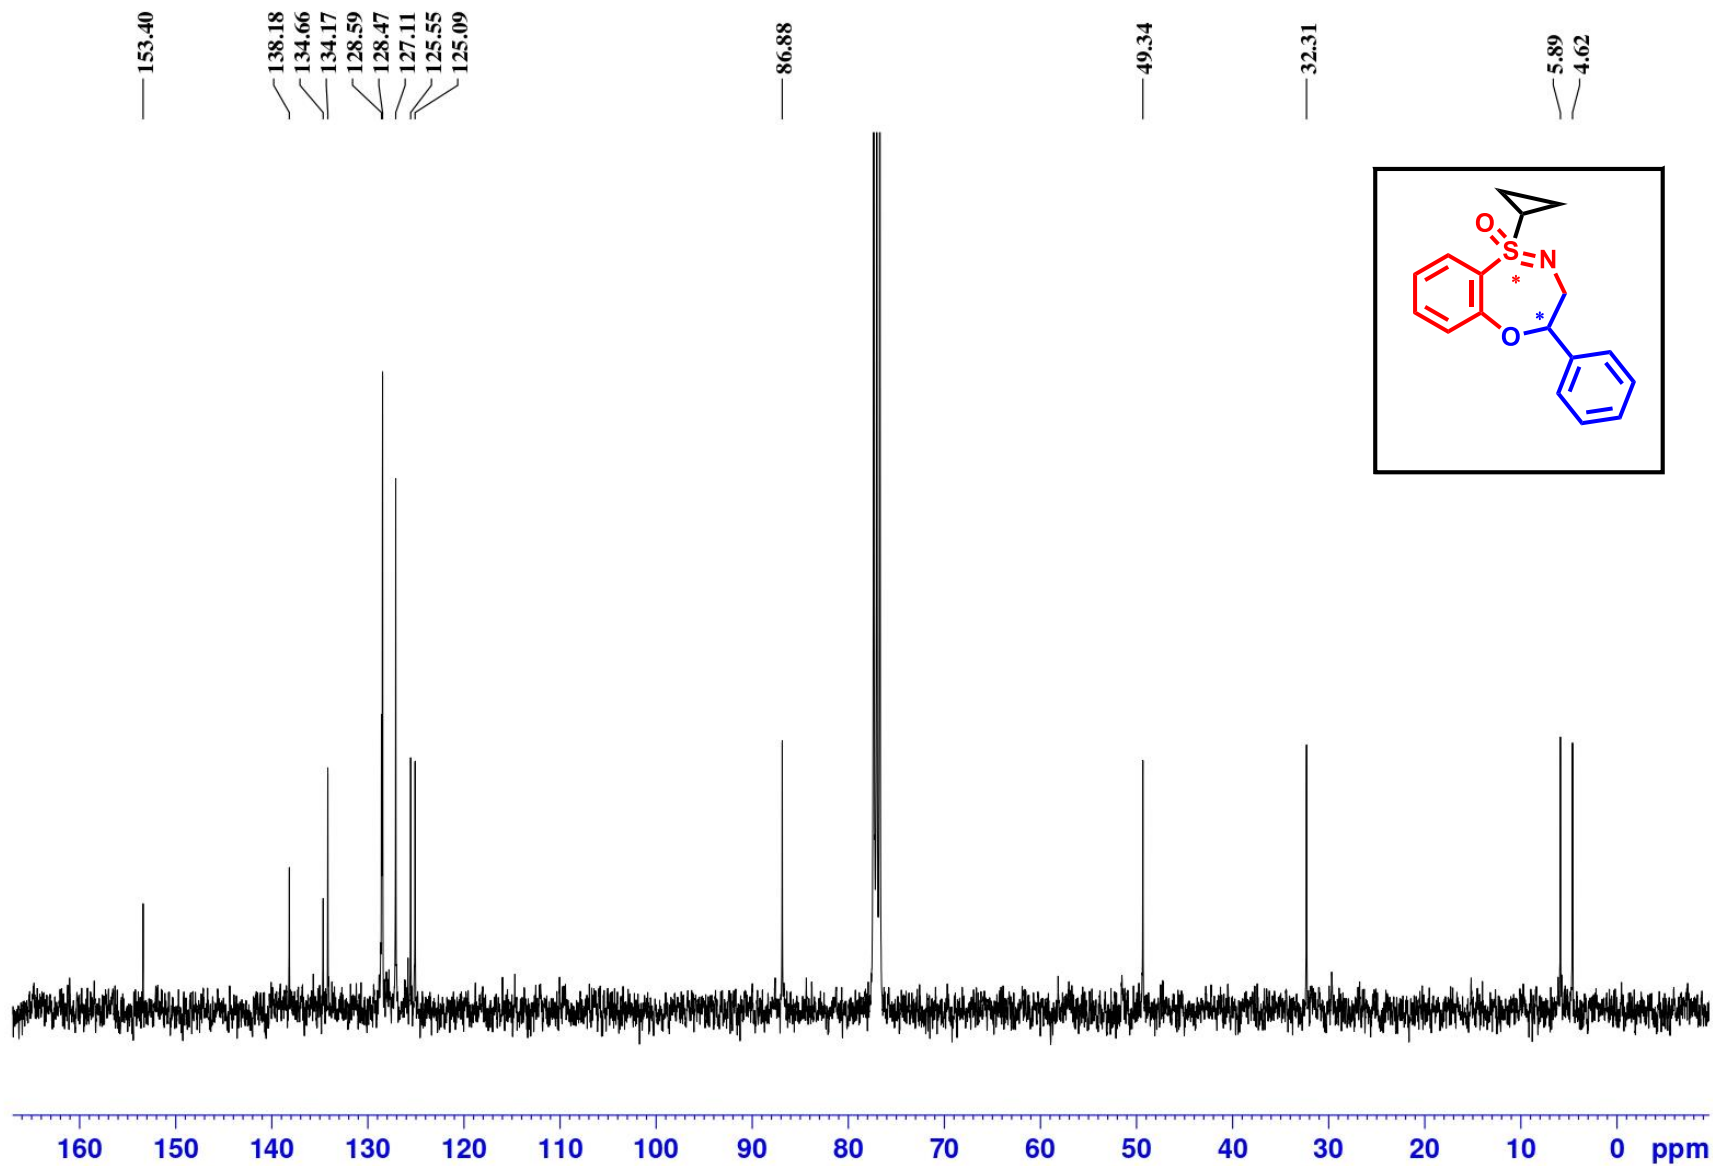

**Fig S-59:**  $^{13}\text{C}$  NMR Spectra of Compound 4f' (100 MHz,  $\text{CDCl}_3$ )



### SAIF [HRMS Report]

|                   |                      |                       |                                  |
|-------------------|----------------------|-----------------------|----------------------------------|
| Data File:        | HRMS21I22FEB16       | Original Data Path:   | D:\INTERNAL NEW\2021\Feb<br>2021 |
| Sample ID:        | AB-157B              | Sample Name:          |                                  |
| Acquisition Date: | 02/22/21 11:43:51 AM | Run Time(min):        | 0.00                             |
| Vial:             | CS&k1-01:16          | Injection Volume(μl): | 1.00                             |

HRMS21I22FEB16 #30-63 RT: 0.25-0.50 AV: 34 SB: 1 0.01 NL: 8.48E6  
T: FTMS + c ESI Full ms [100.00-750.00]

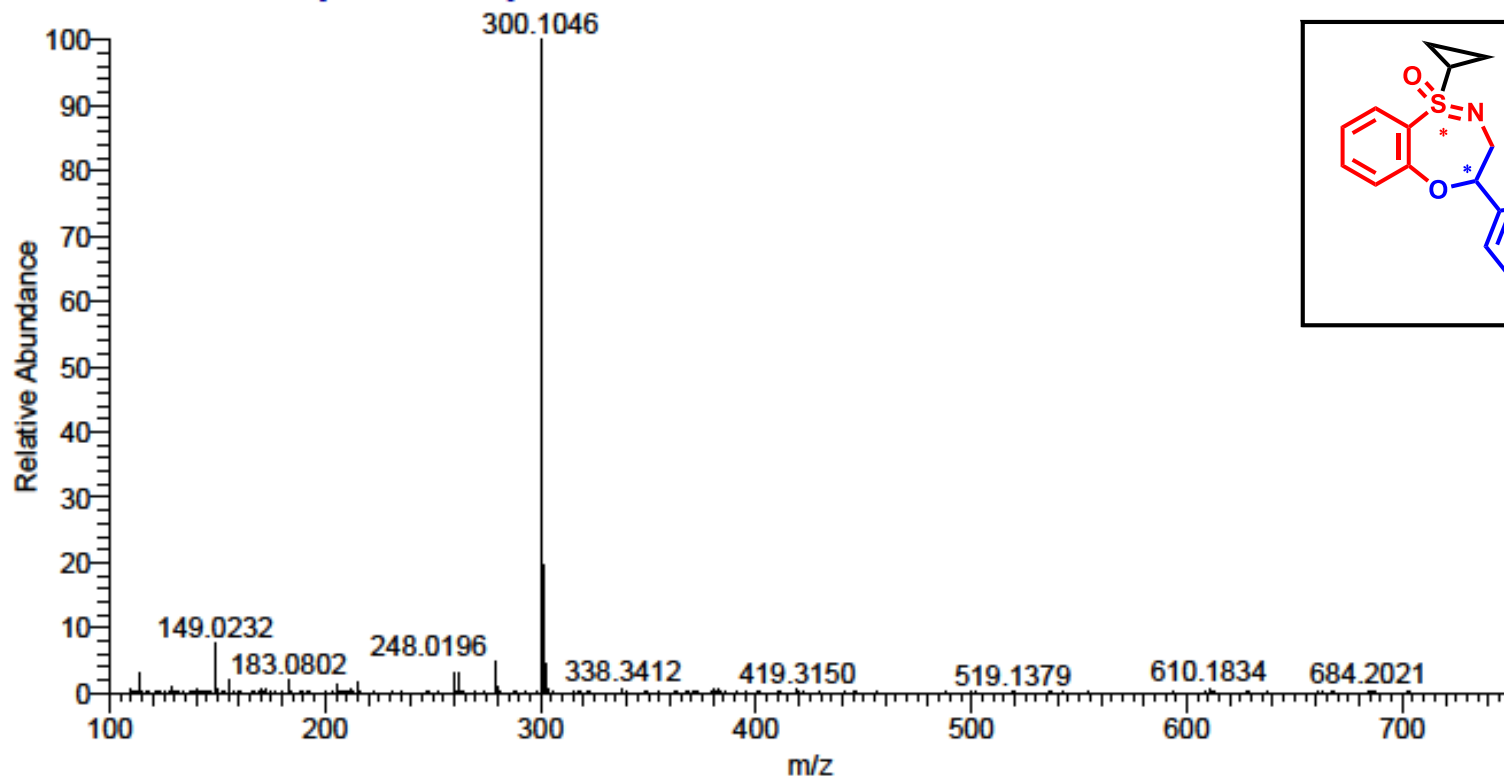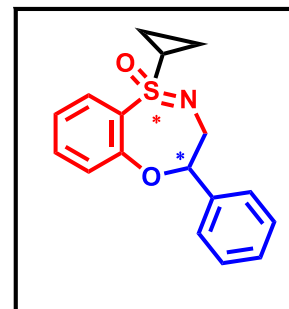

Fig S-60: HRMS report of Compound 4f'

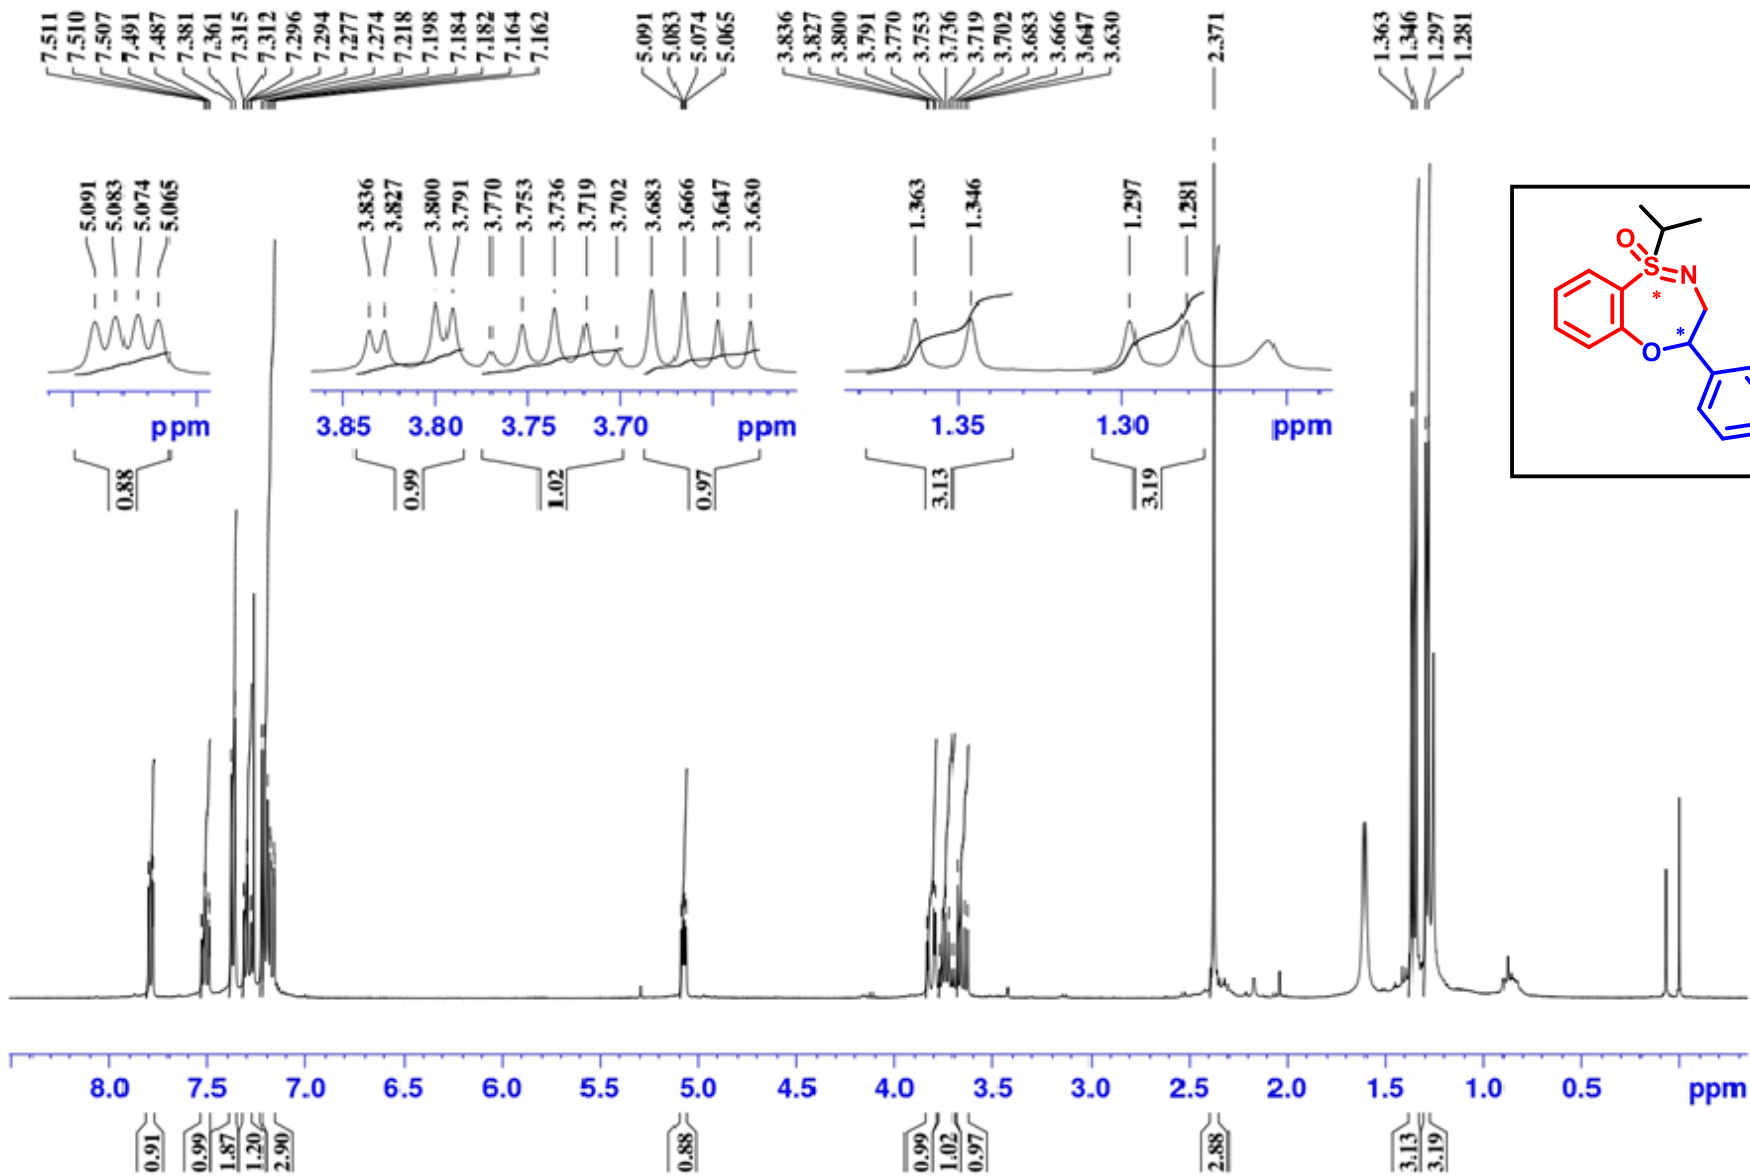

**Fig S-61:**  $^1\text{H}$  NMR Spectra of Compound **4g** (400 MHz,  $\text{CDCl}_3$ )

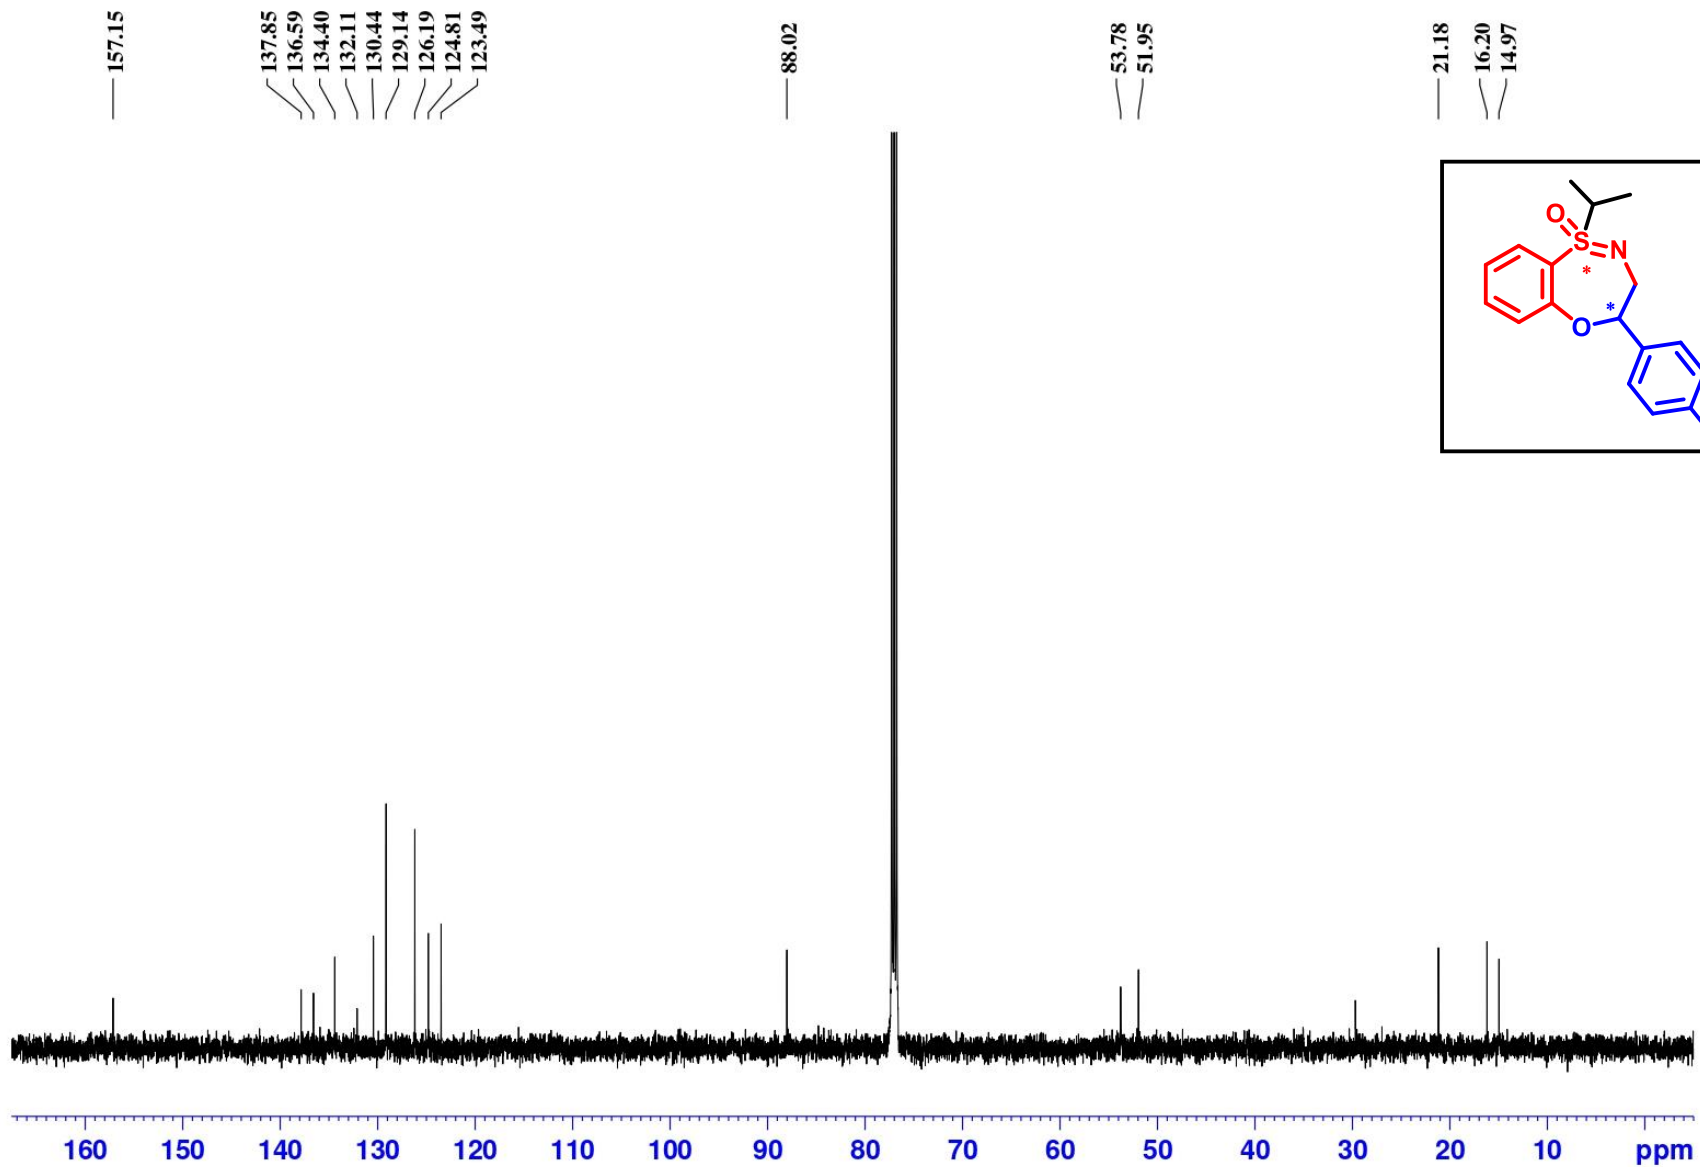

**Fig S-62:**  $^{13}\text{C}$  NMR Spectra of Compound **4g** (125 MHz,  $\text{CDCl}_3$ )

## SAIF [HRMS Report]

|                   |                      |                             |                                  |
|-------------------|----------------------|-----------------------------|----------------------------------|
| Data File:        | HRMS21I02MAR20       | Original Data Path:         | D:\INTERNAL NEW\2021\Mar<br>2021 |
| Sample ID:        | AB-162A              | Sample Name:                |                                  |
| Acquisition Date: | 03/02/21 11:34:09 AM | Run Time(min):              | 0.00                             |
| Vial:             | CStk1-01:20          | Injection Volume( $\mu$ l): | 1.00                             |

HRMS21I02MAR20 #26-57 RT: 0.25-0.50 AV: 32 SB: 1 0.01 NL: 4.45E6  
T: FTMS + c ESI Full ms [100.00-750.00]

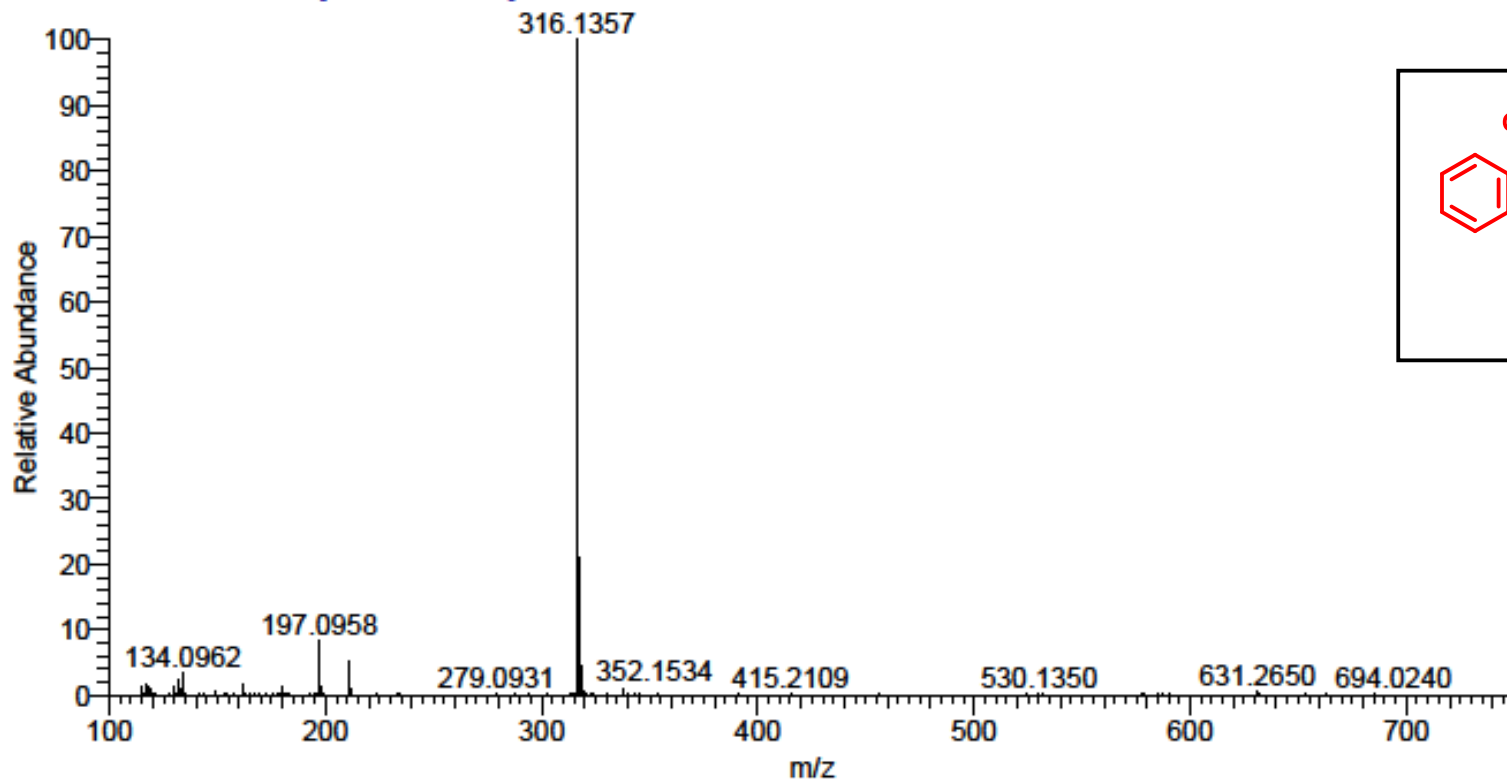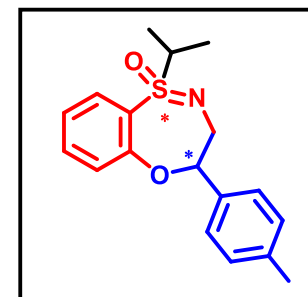

Fig S-63: HRMS report of Compound 4g

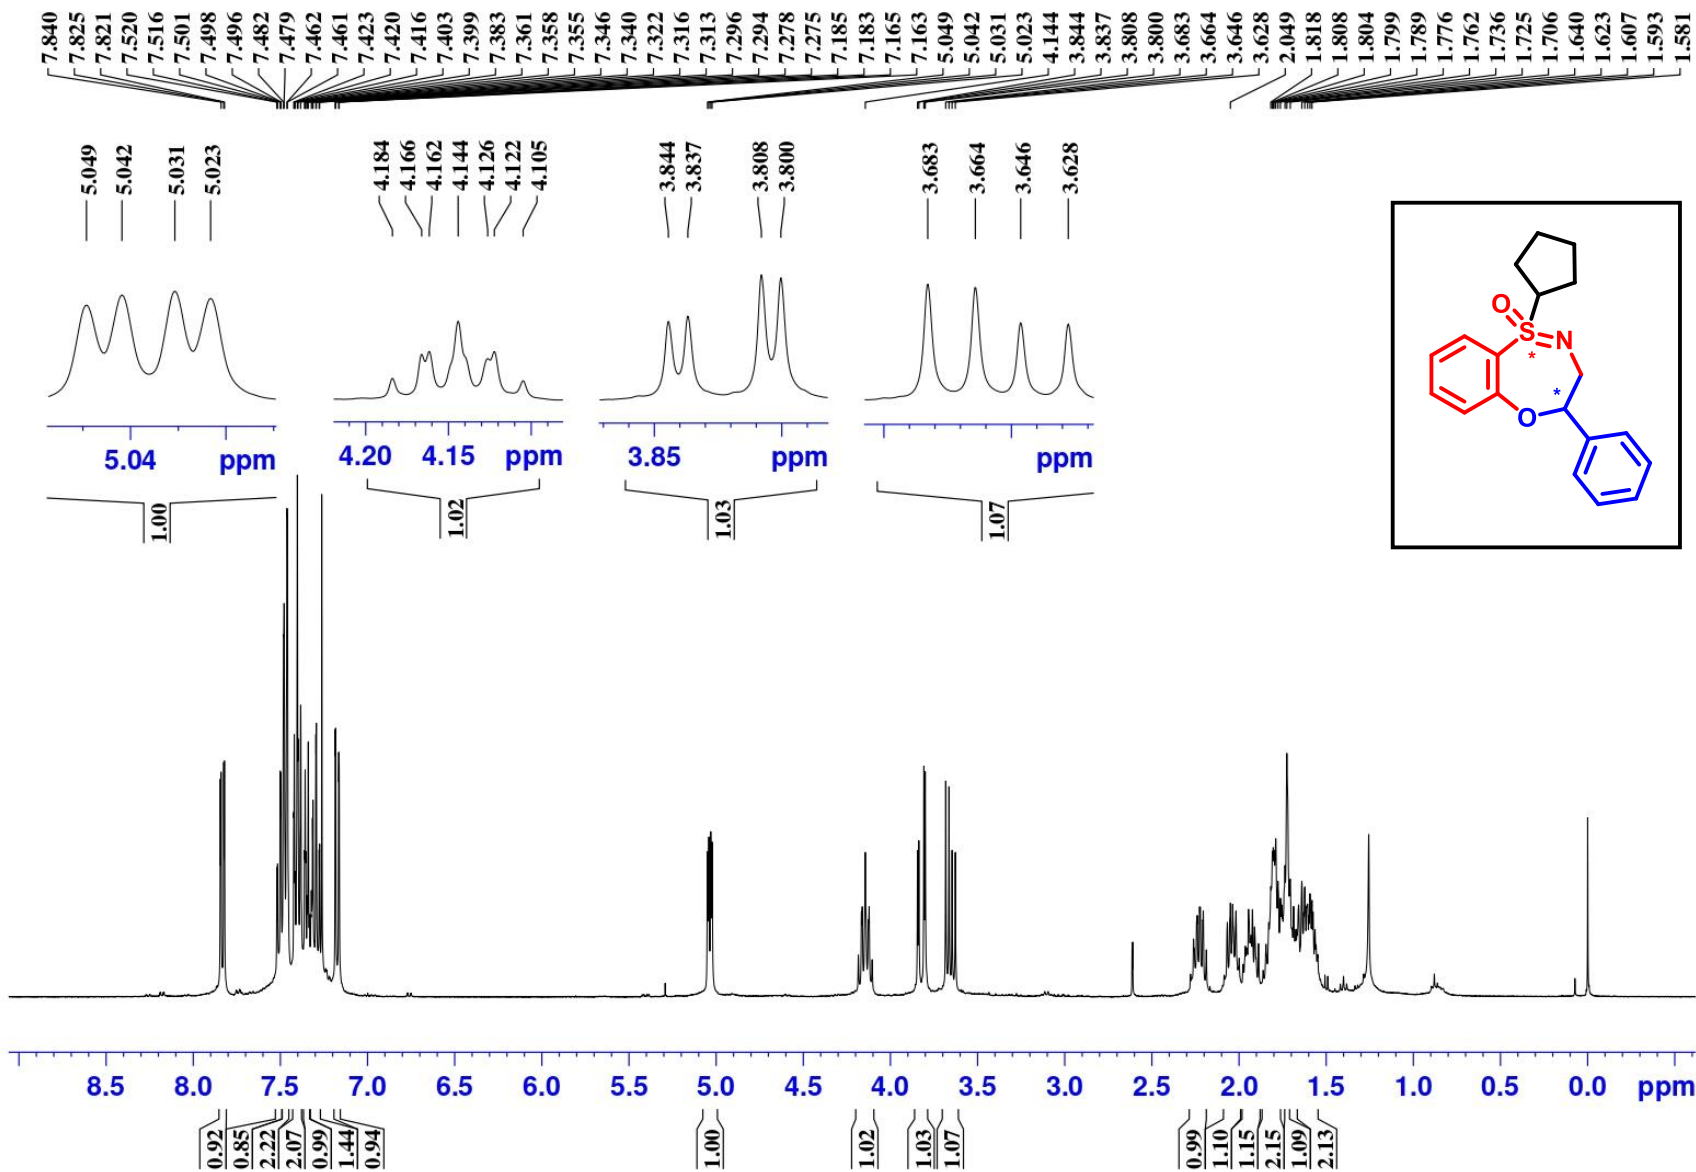

**Fig S-64:**  $^1\text{H}$  NMR Spectra of Compound **4h** (400 MHz,  $\text{CDCl}_3$ )

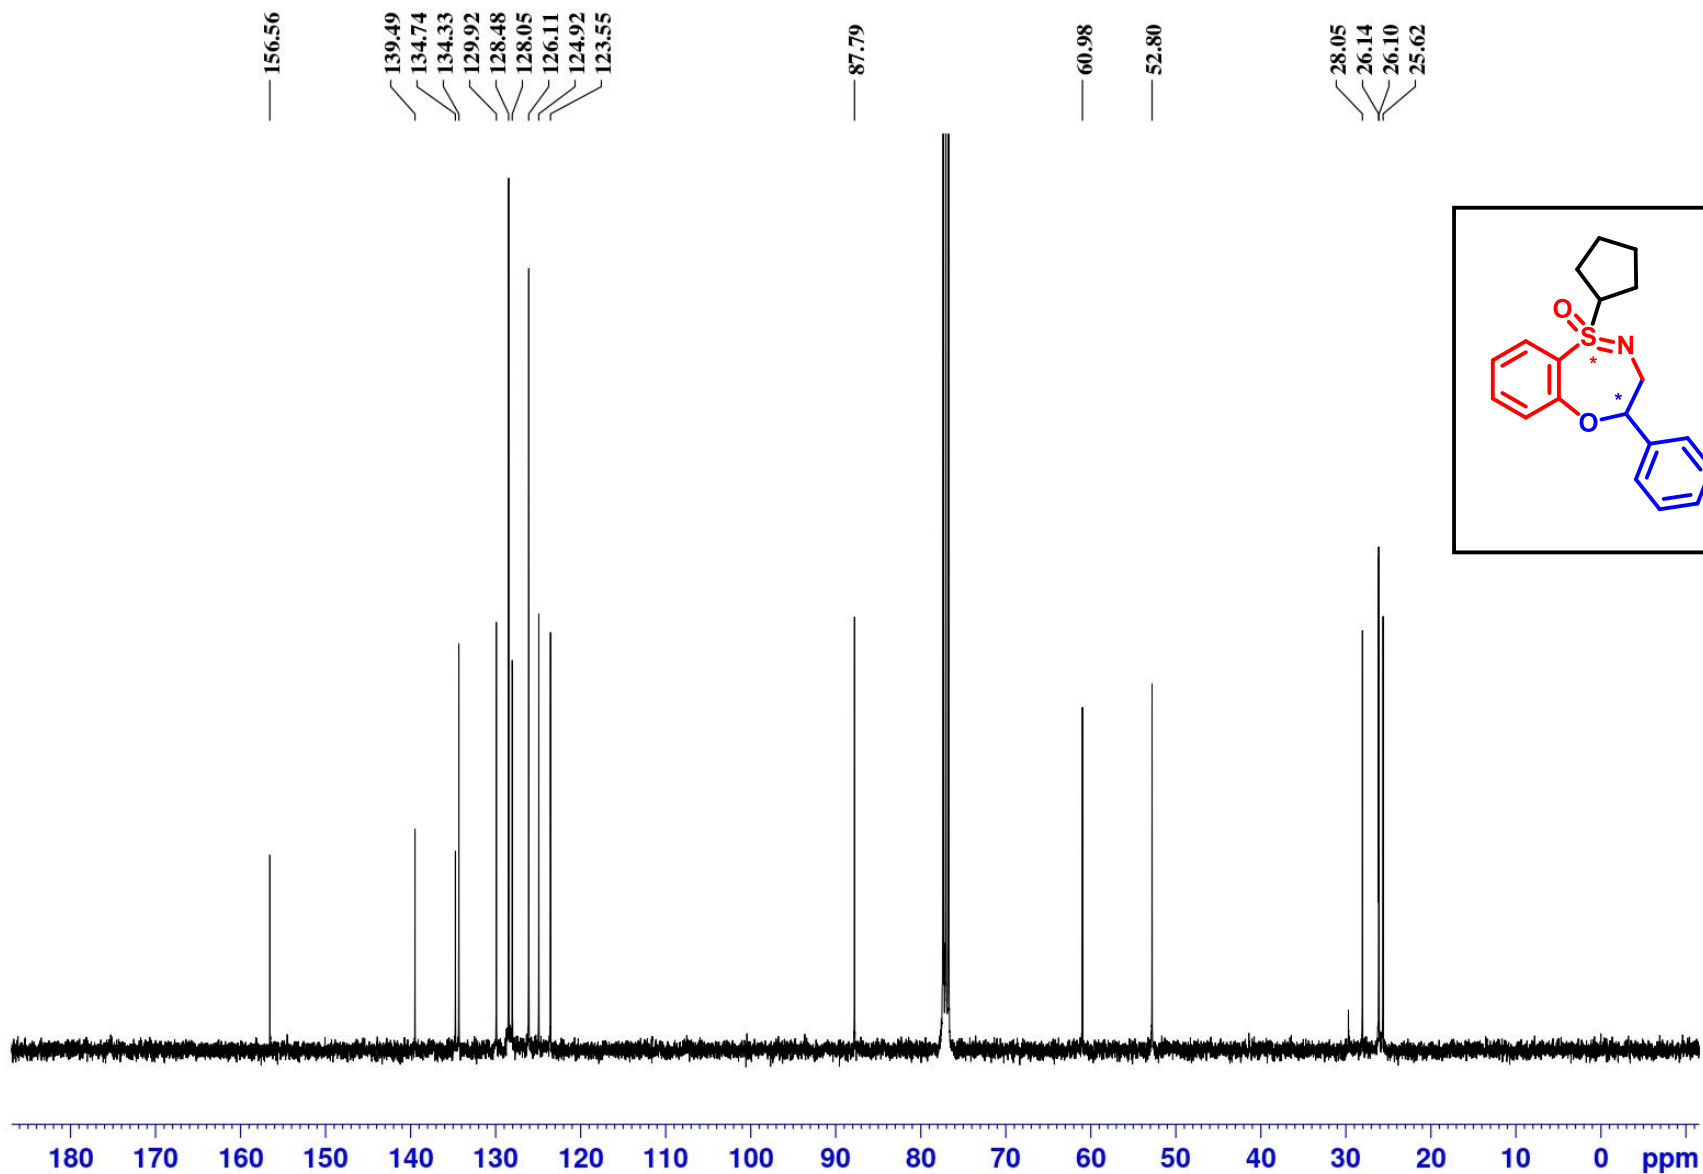

**Fig S-65:**  $^{13}\text{C}$  NMR Spectra of Compound **4h** (100 MHz,  $\text{CDCl}_3$ )

## SAIF [HRMS Report]

|                   |                      |                       |                                  |
|-------------------|----------------------|-----------------------|----------------------------------|
| Data File:        | HRMS21I09MAR16       | Original Data Path:   | D:\INTERNAL NEW\2021\Mar<br>2021 |
| Sample ID:        | AB-164A              | Sample Name:          |                                  |
| Acquisition Date: | 03/09/21 11:11:18 AM | Run Time(min):        | 0.00                             |
| Vial:             | CStk1-01:16          | Injection Volume(μl): | 1.00                             |

HRMS21I09MAR16 #30-63 RT: 0.25-0.50 AV: 34 SB: 1 0.01 NL: 1.47E7  
T: FTMS + c ESI Full ms [100.00-750.00]

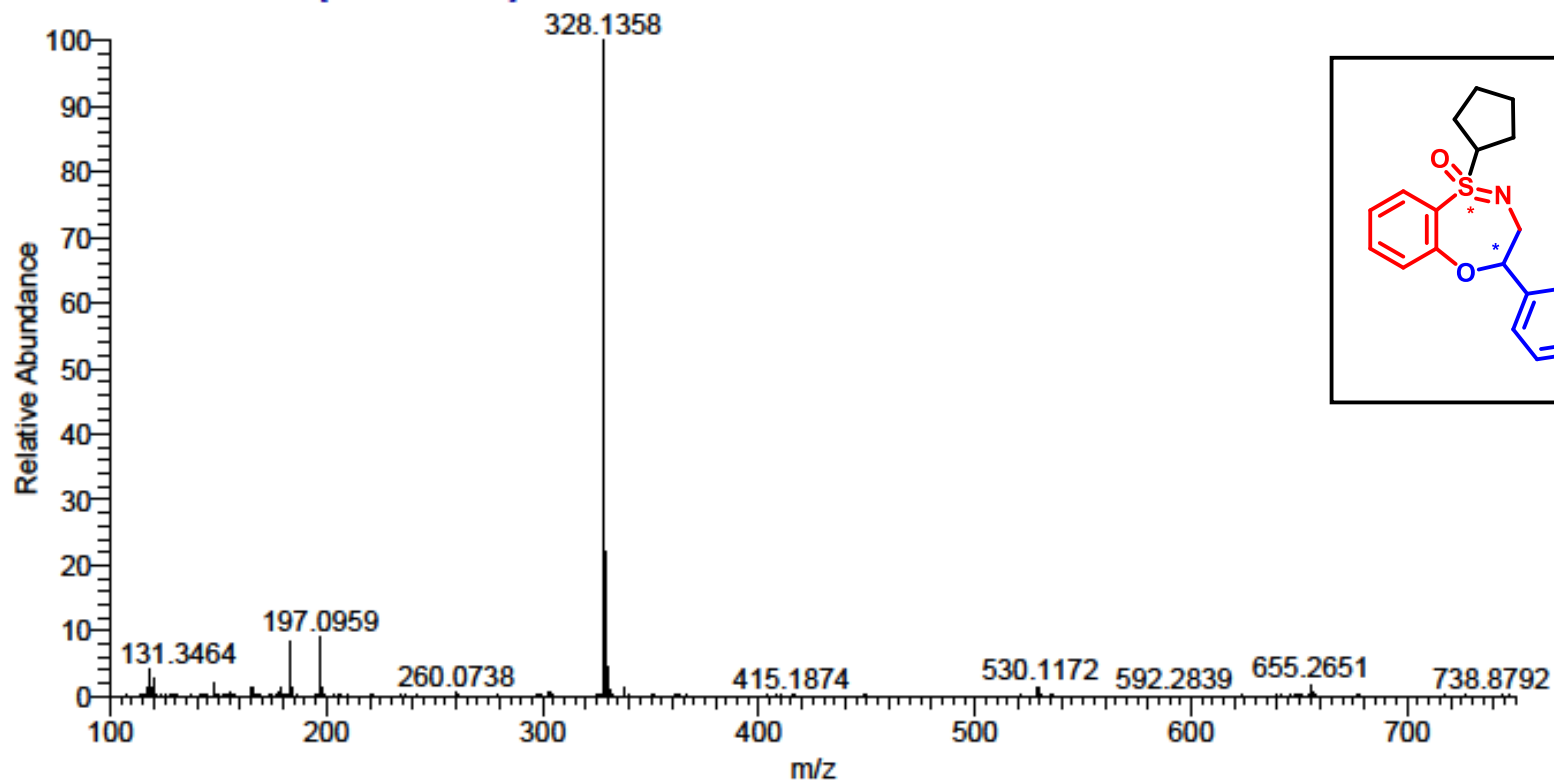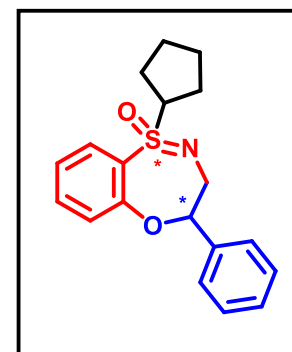

Fig S-66: HRMS report of Compound 4h

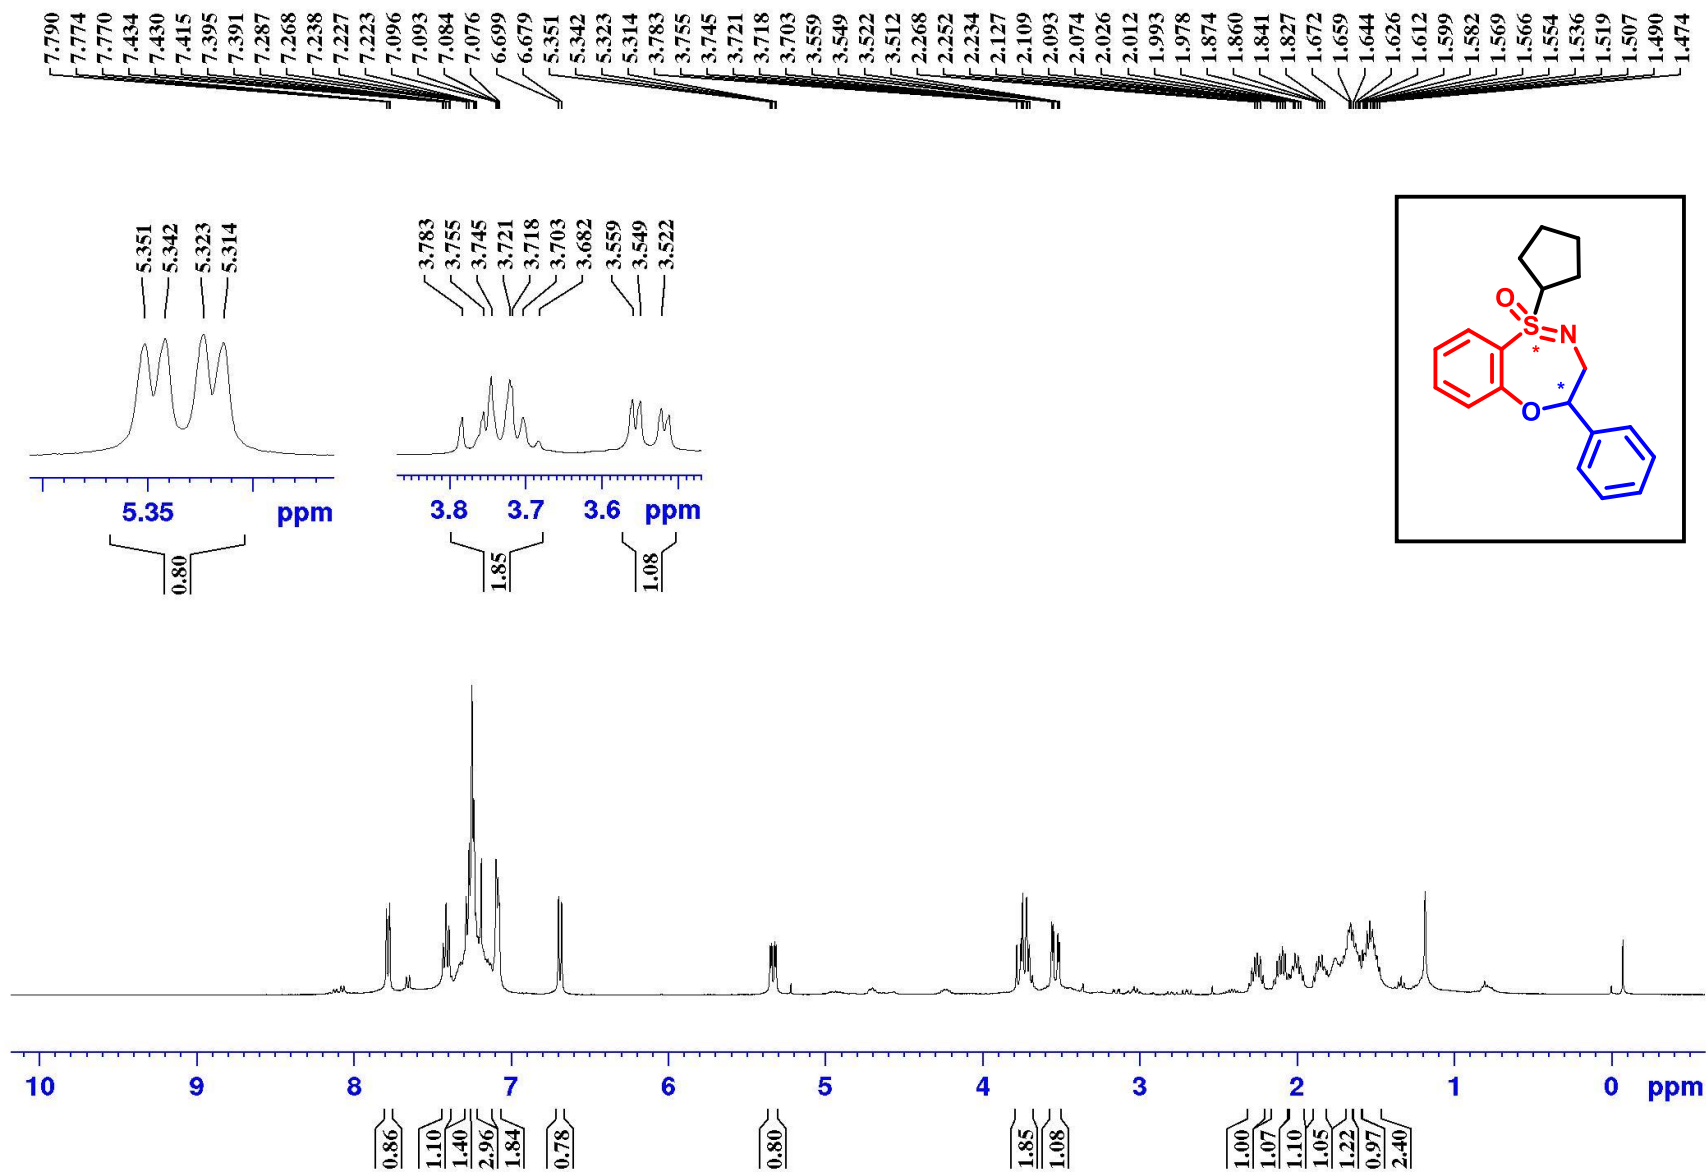

**Fig S-67:** <sup>1</sup>H NMR Spectra of Compound 4h' (400 MHz, CDCl<sub>3</sub>)



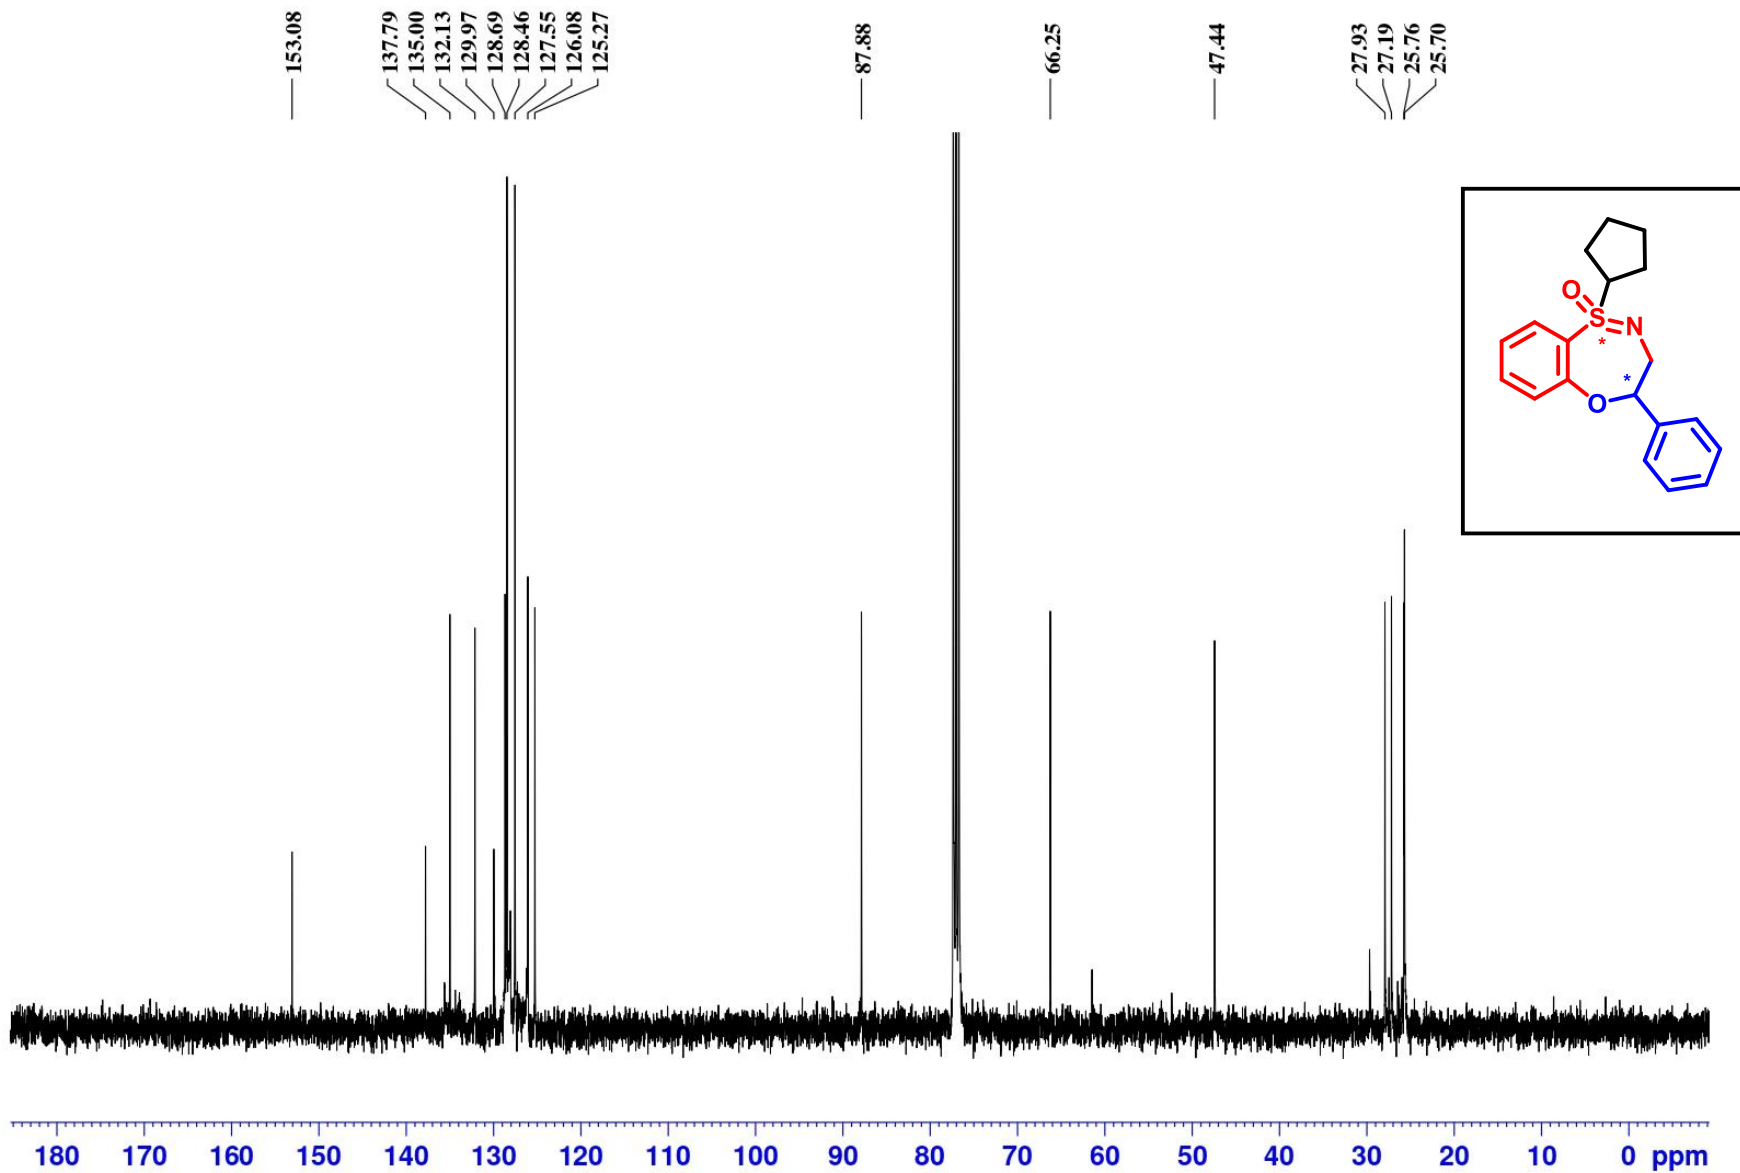

**Fig S-68:**  $^{13}\text{C}$  NMR Spectra of Compound 4h' (100 MHz,  $\text{CDCl}_3$ )

## SAIF [HRMS Report]

|                   |                      |                       |                                  |
|-------------------|----------------------|-----------------------|----------------------------------|
| Data File:        | HRMS21I09MAR17       | Original Data Path:   | D:\INTERNAL NEW\2021\Mar<br>2021 |
| Sample ID:        | AB-164B              | Sample Name:          |                                  |
| Acquisition Date: | 03/09/21 11:13:17 AM | Run Time(min):        | 0.00                             |
| Vial:             | CS&k1-01:17          | Injection Volume(μl): | 1.00                             |

HRMS21I09MAR17 #30-62 RT: 0.25-0.50 AV: 33 SB: 1 0.01 NL: 6.07E6  
T: FTMS + c ESI Full ms [100.00-750.00]

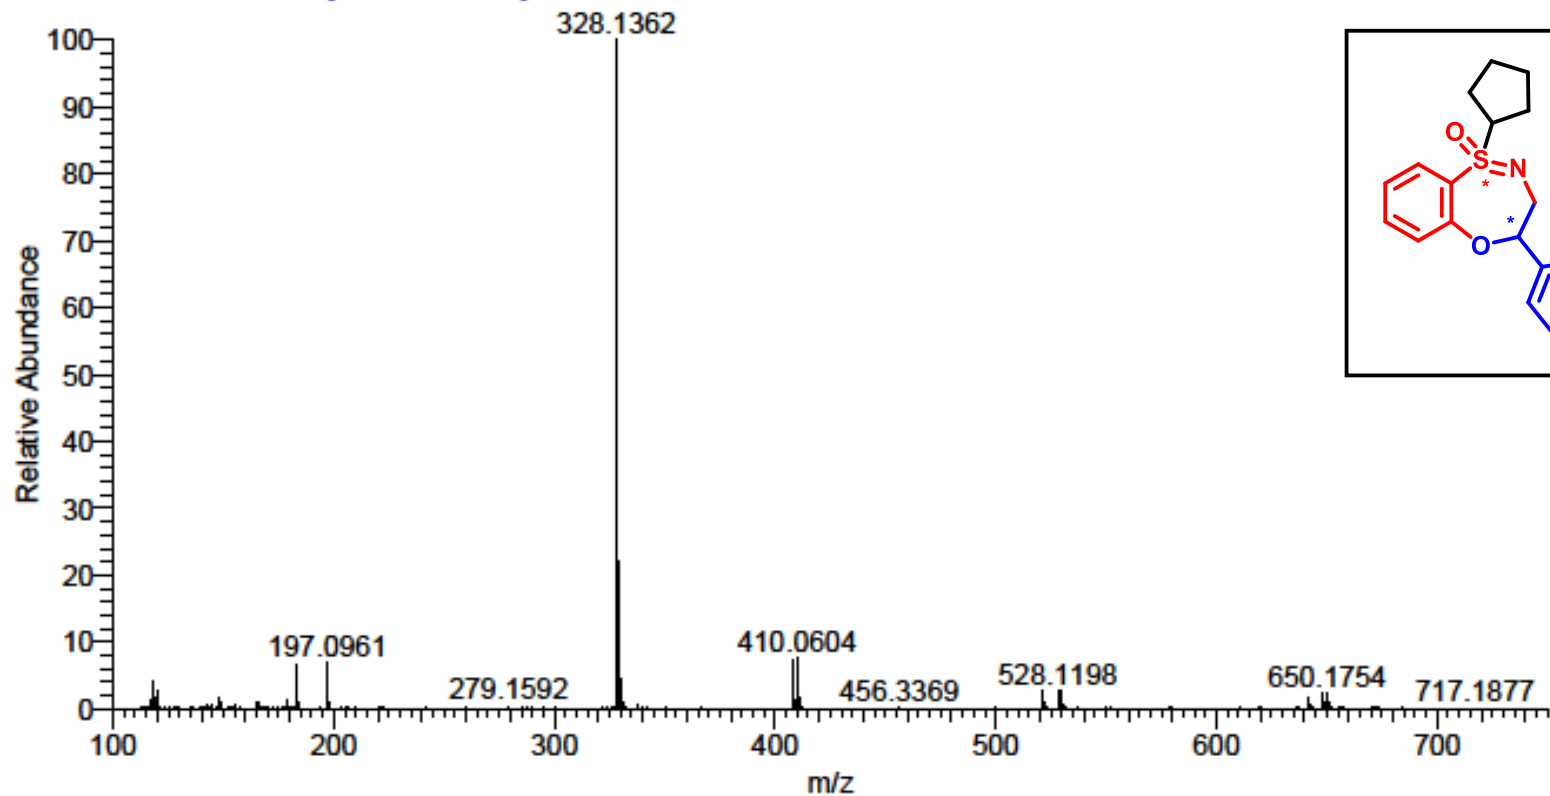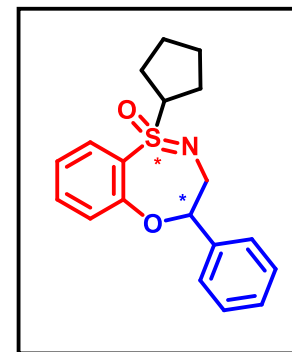

Fig S-69: HRMS report of Compound 4h'

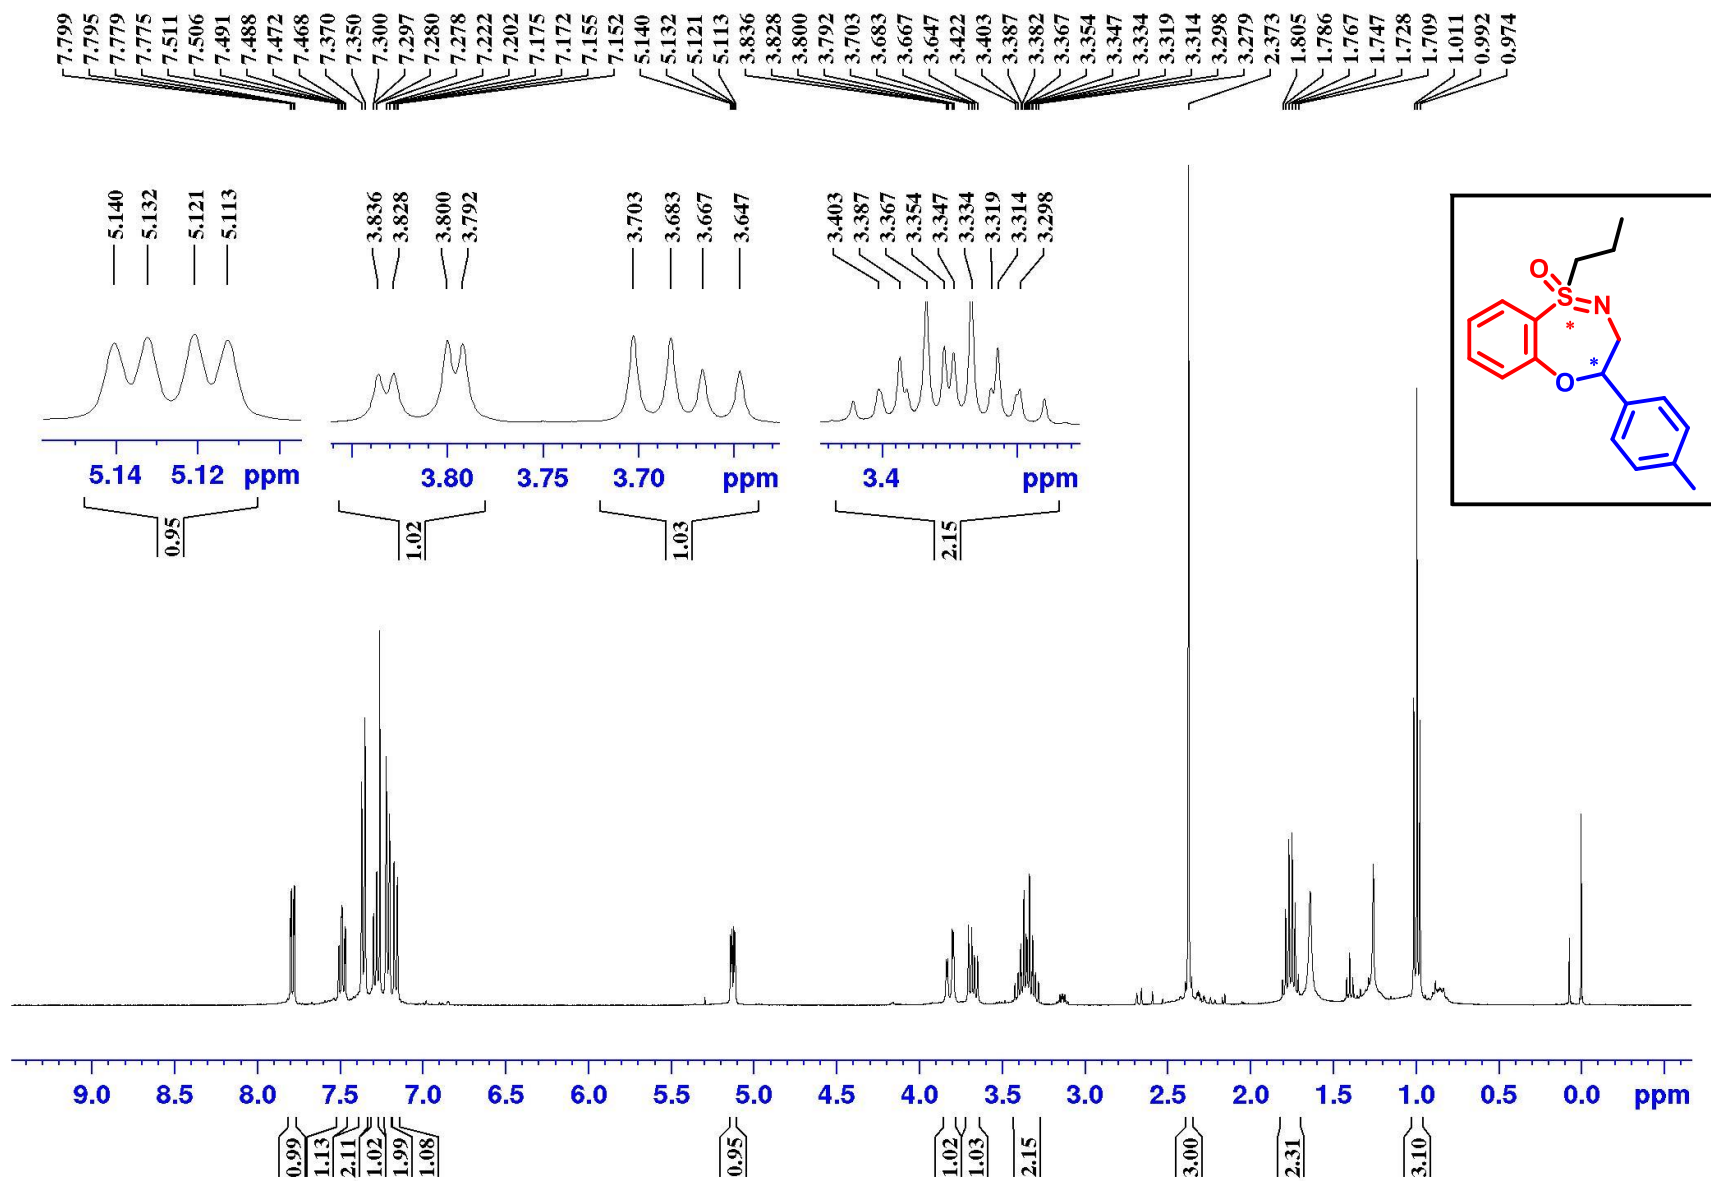

**Fig S-70:**  $^1\text{H}$  NMR Spectra of Compound **4i** (400 MHz,  $\text{CDCl}_3$ )

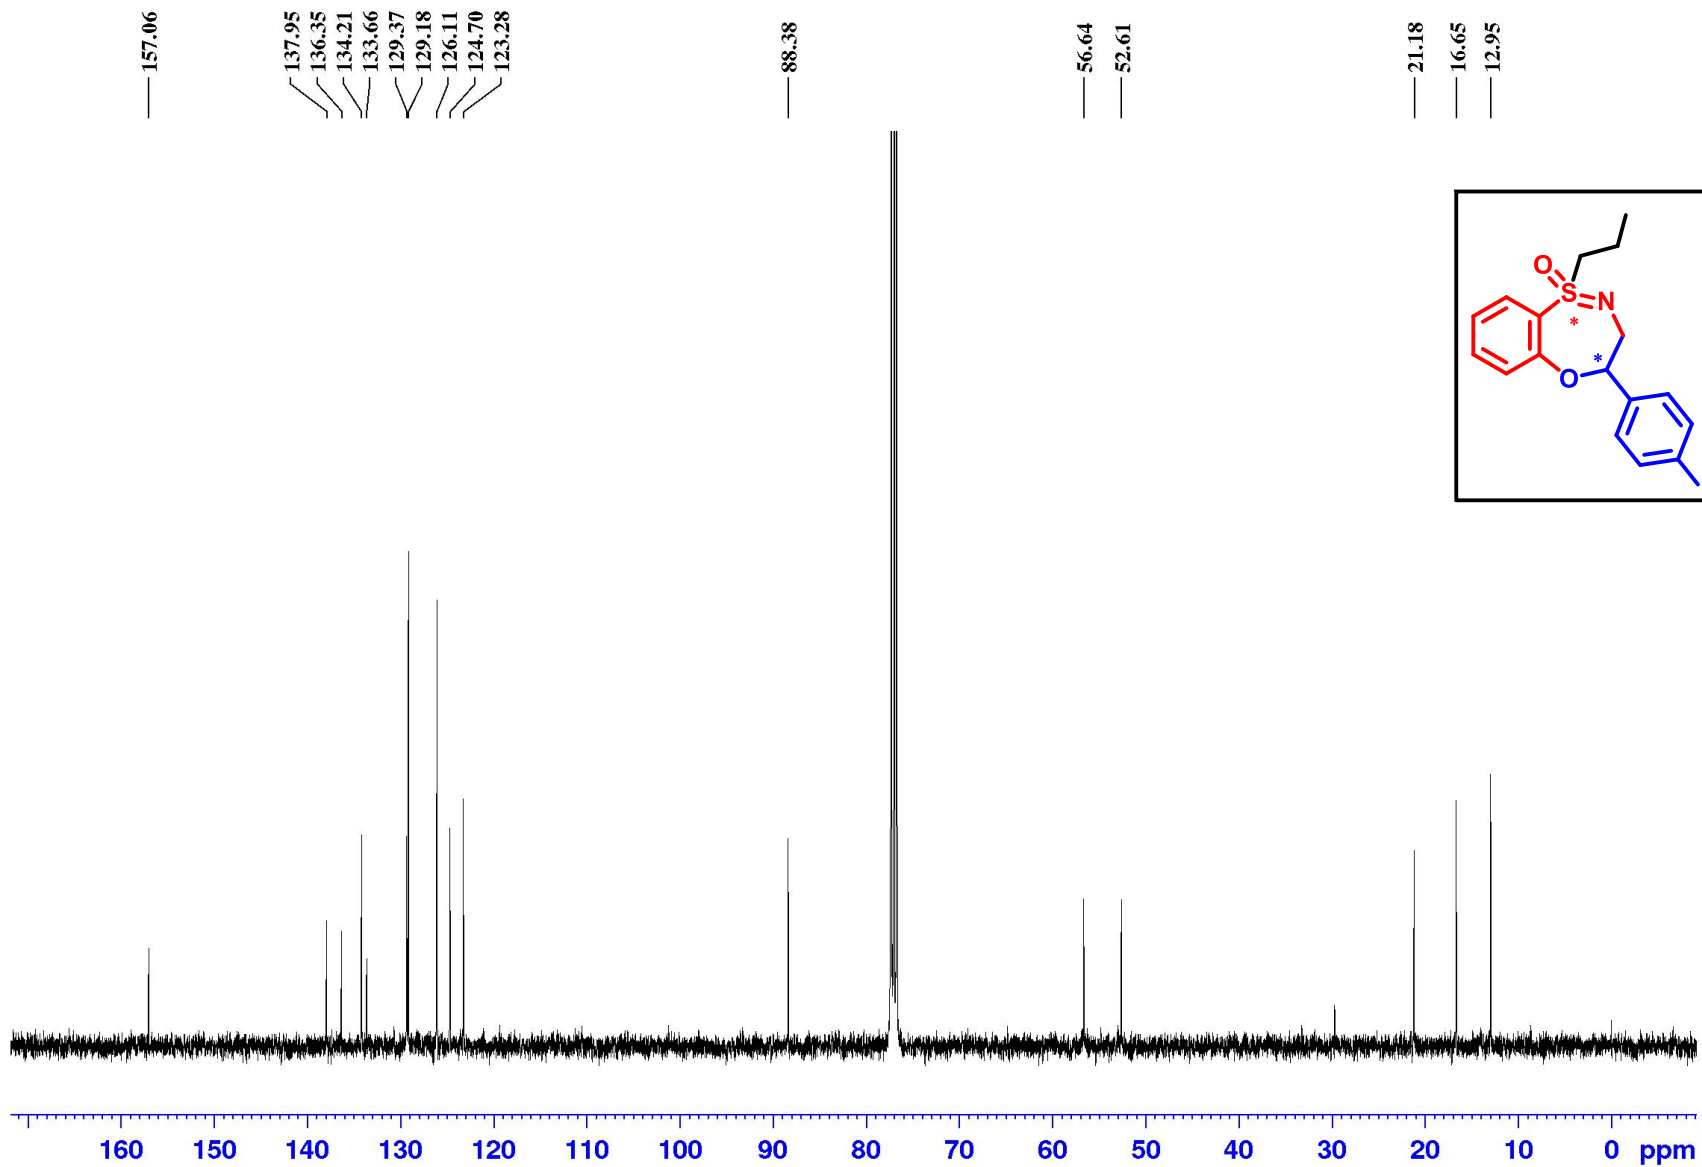

**Fig S-71:** <sup>13</sup>C NMR Spectra of Compound **4i** (100 MHz, CDCl<sub>3</sub>)

## SAIF [HRMS Report]

|                   |                      |                       |                                  |
|-------------------|----------------------|-----------------------|----------------------------------|
| Data File:        | HRMS21I18MAR34       | Original Data Path:   | D:\INTERNAL NEW\2021\Mar<br>2021 |
| Sample ID:        | AB-166A              | Sample Name:          |                                  |
| Acquisition Date: | 03/18/21 11:52:52 AM | Run Time(min):        | 0.00                             |
| Vial:             | CStk1-01:34          | Injection Volume(μl): | 1.00                             |

HRMS21I18MAR34 #32-64 RT: 0.25-0.50 AV: 33 SB: 1 0.01 NL: 3.70E6  
T: FTMS + c ESI Full ms [100.00-750.00]

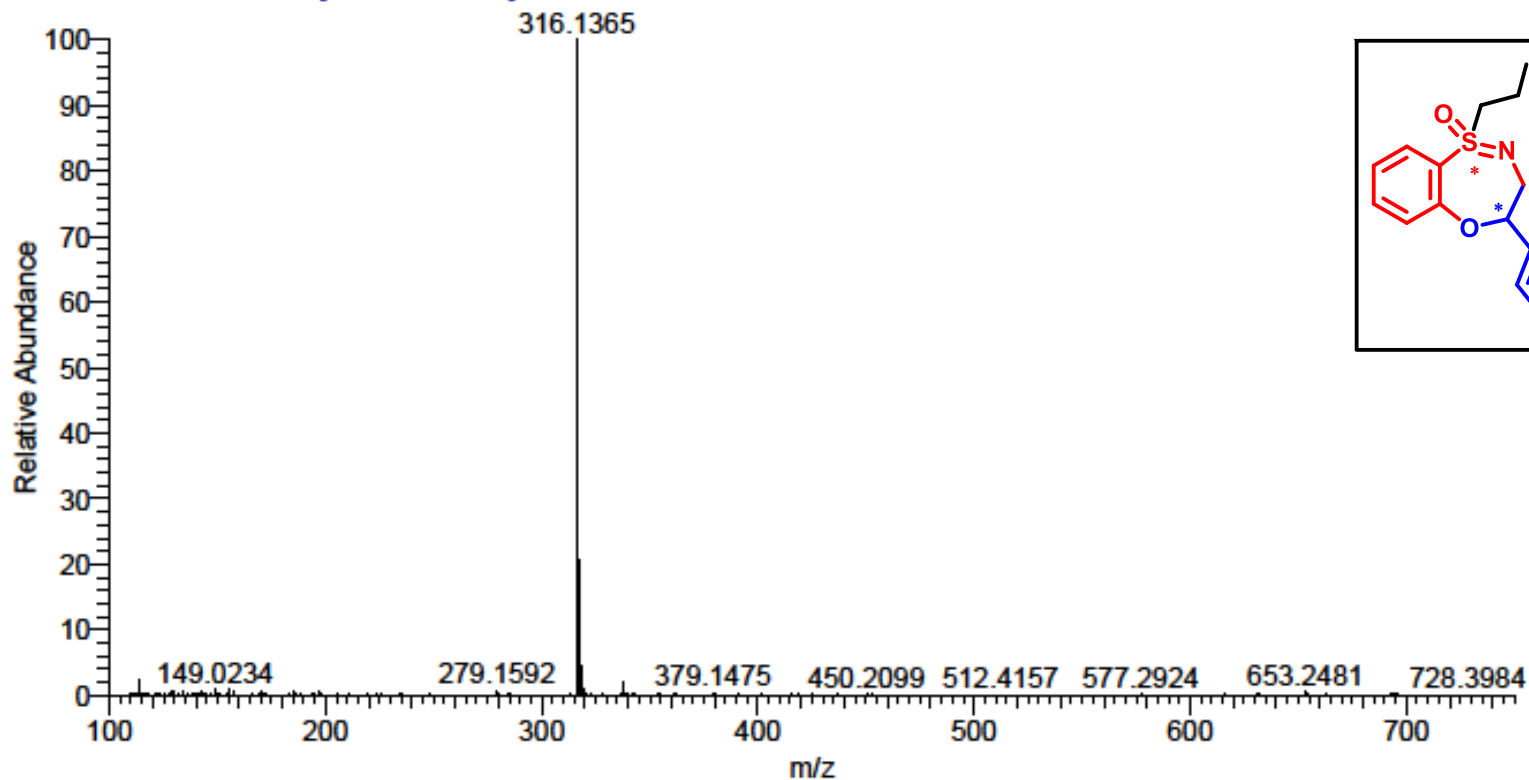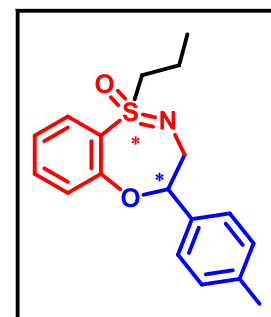

Fig S-72: HRMS report of Compound 4i

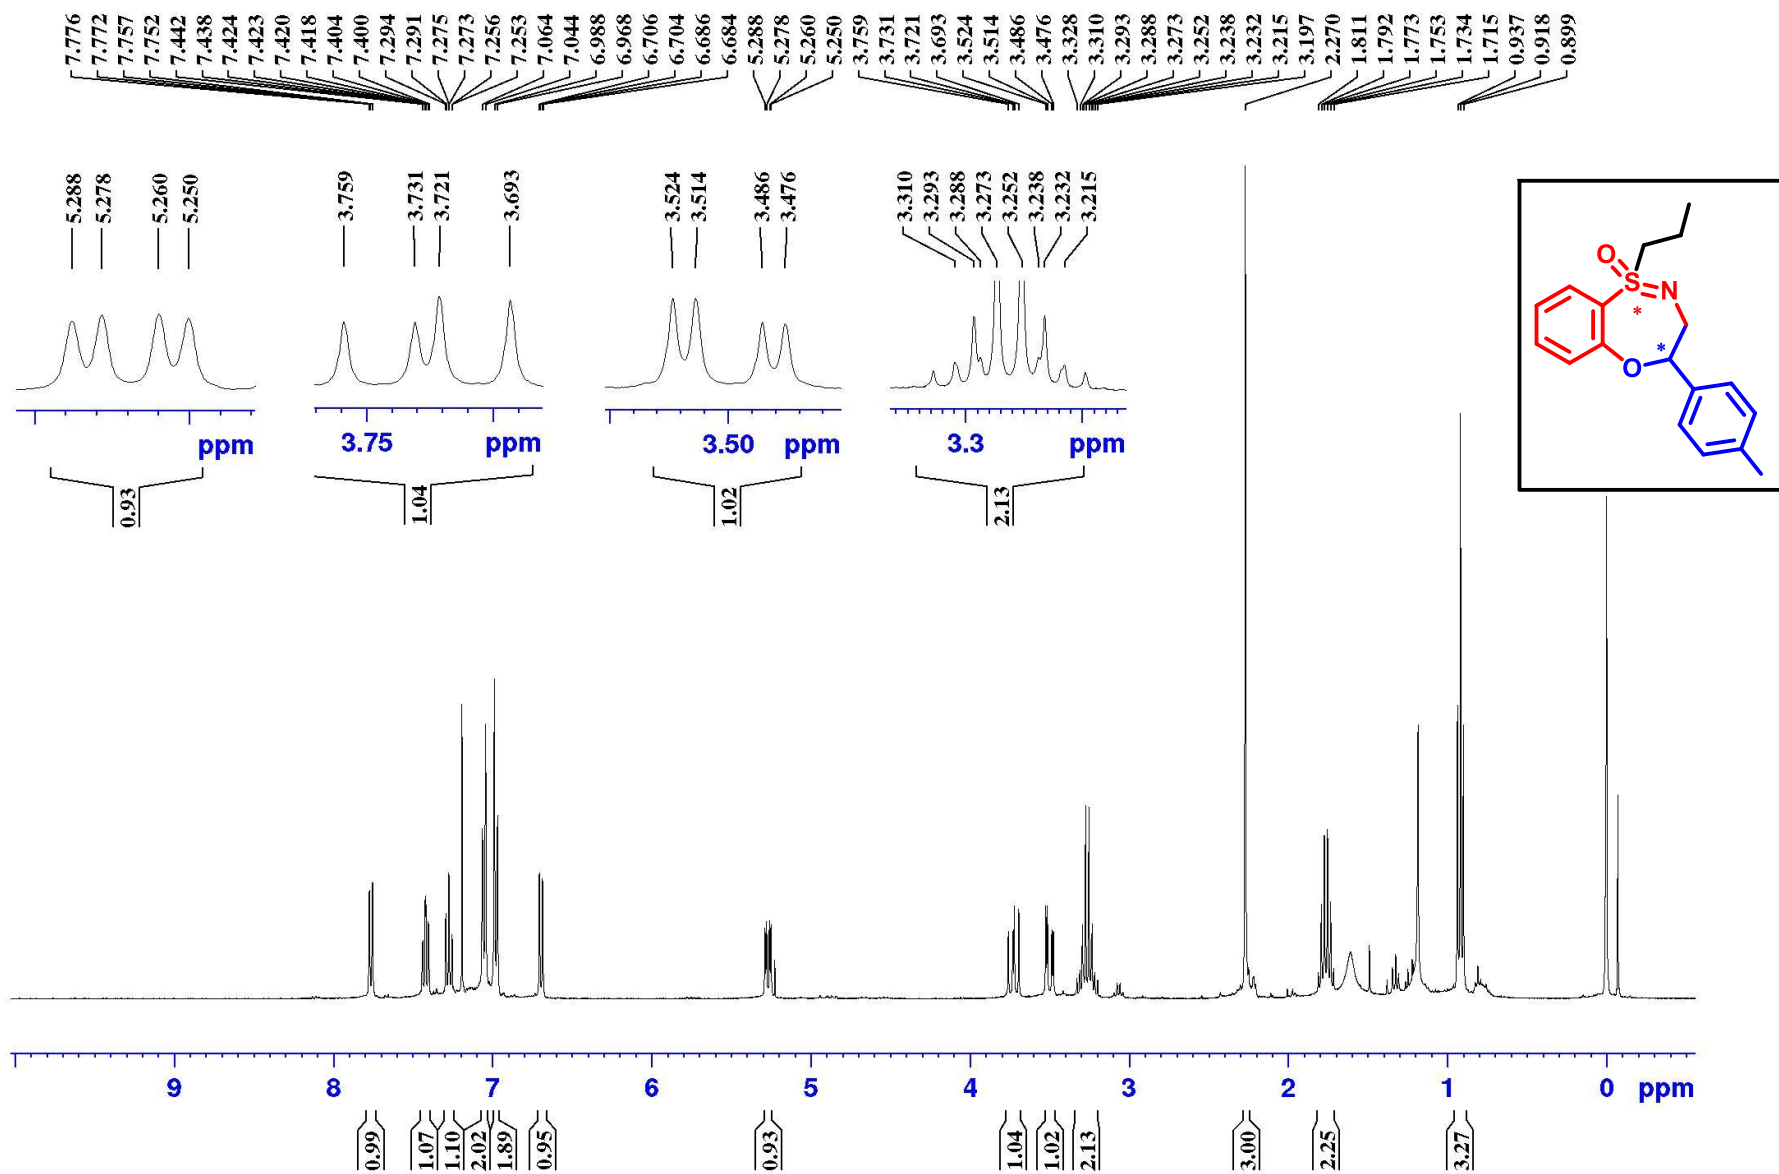

**Fig S-73:**  $^1\text{H}$  NMR Spectra of Compound 4i' (400 MHz,  $\text{CDCl}_3$ )

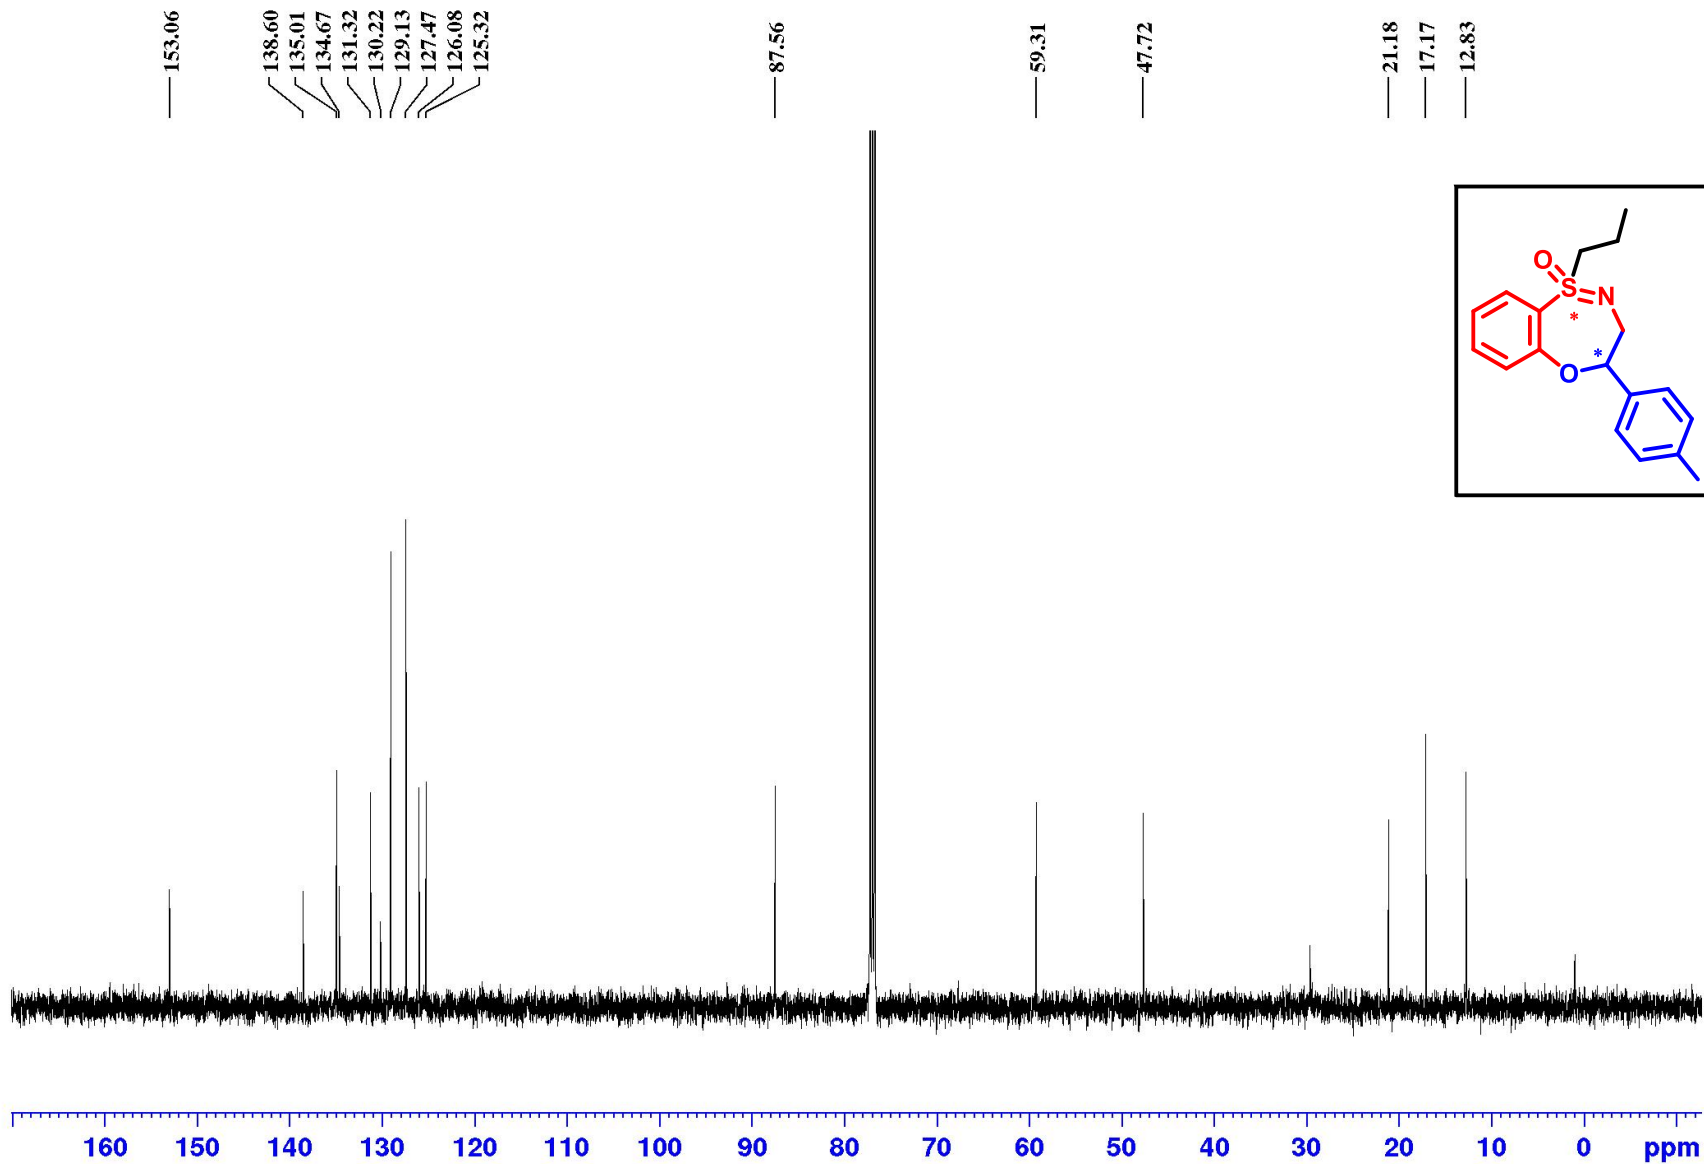

**Fig S-74:**  $^{13}\text{C}$  NMR Spectra of Compound 4i' (100 MHz,  $\text{CDCl}_3$ )

## SAIF [HRMS Report]

|                   |                      |                       |                                  |
|-------------------|----------------------|-----------------------|----------------------------------|
| Data File:        | HRMS21I17MAR12       | Original Data Path:   | D:\INTERNAL NEW\2021\Mar<br>2021 |
| Sample ID:        | AB-166B              | Sample Name:          |                                  |
| Acquisition Date: | 03/17/21 11:26:08 AM | Run Time(min):        | 0.00                             |
| Vial:             | CStk1-01:12          | Injection Volume(μl): | 1.00                             |

HRMS21I17MAR12 #32-65 RT: 0.25-0.50 AV: 34 SB: 1 0.01 NL: 7.06E6  
T: FTMS + c ESI Full ms [100.00-750.00]

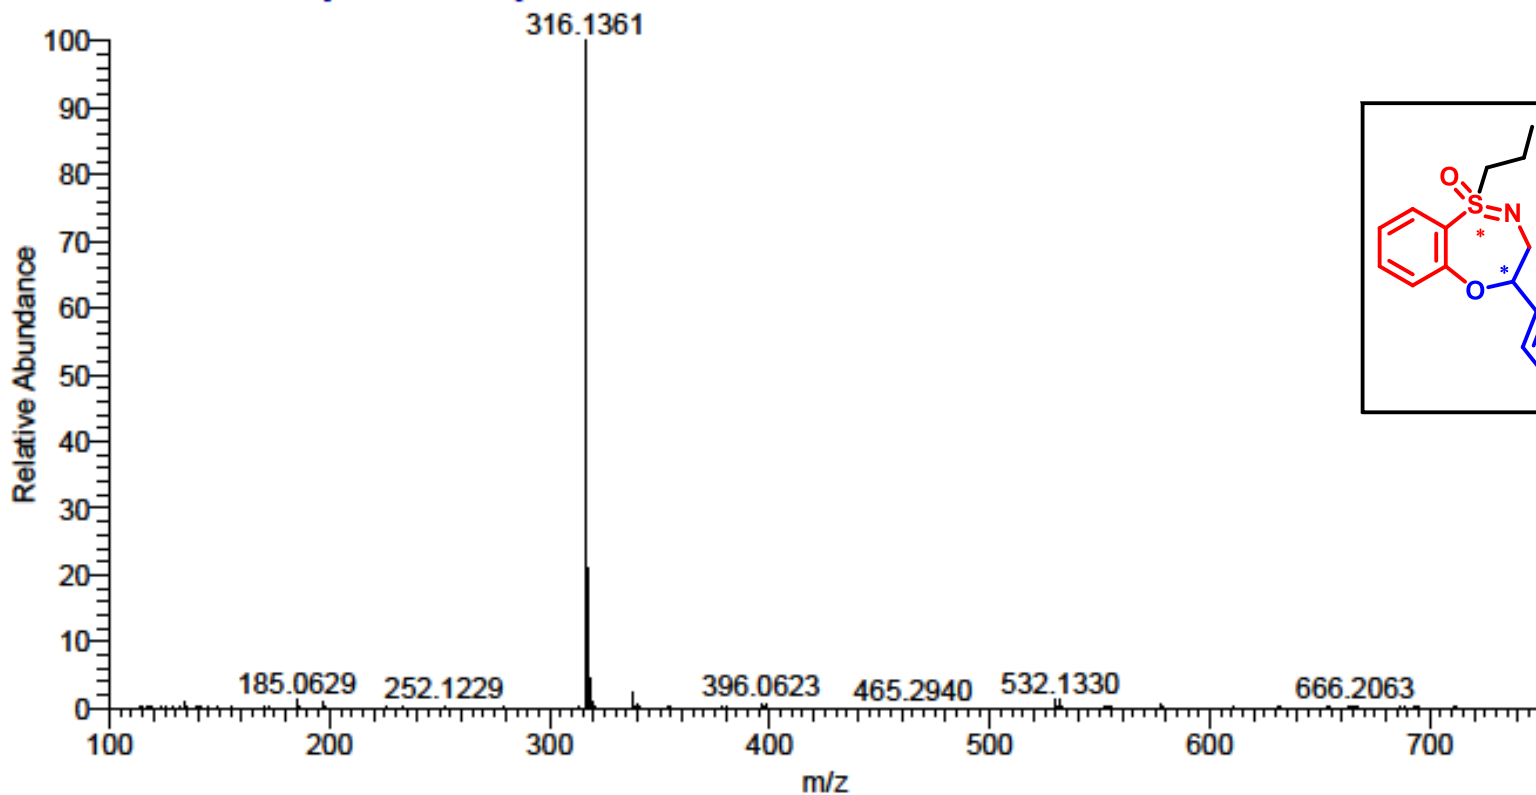

Fig S-75: HRMS report of Compound 4i'



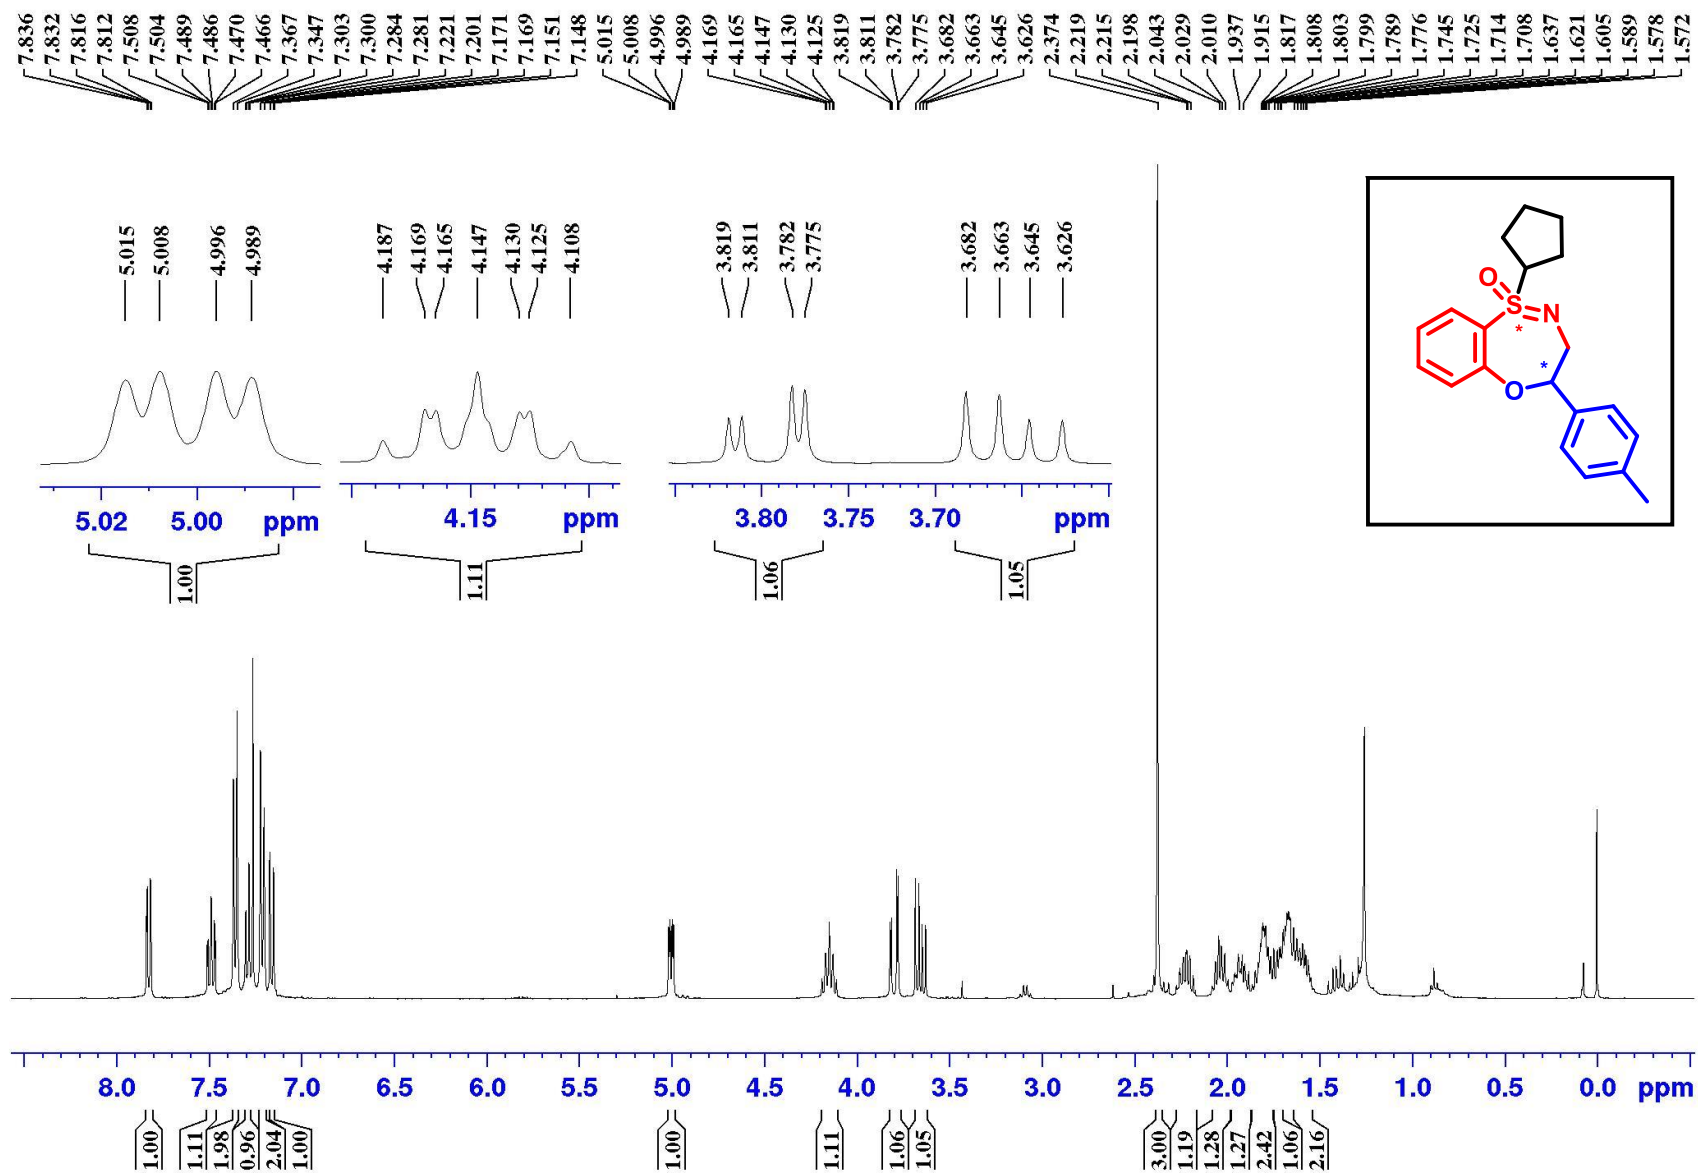

**Fig S-76: <sup>1</sup>H NMR Spectra of Compound 4j (400 MHz, CDCl<sub>3</sub>)**

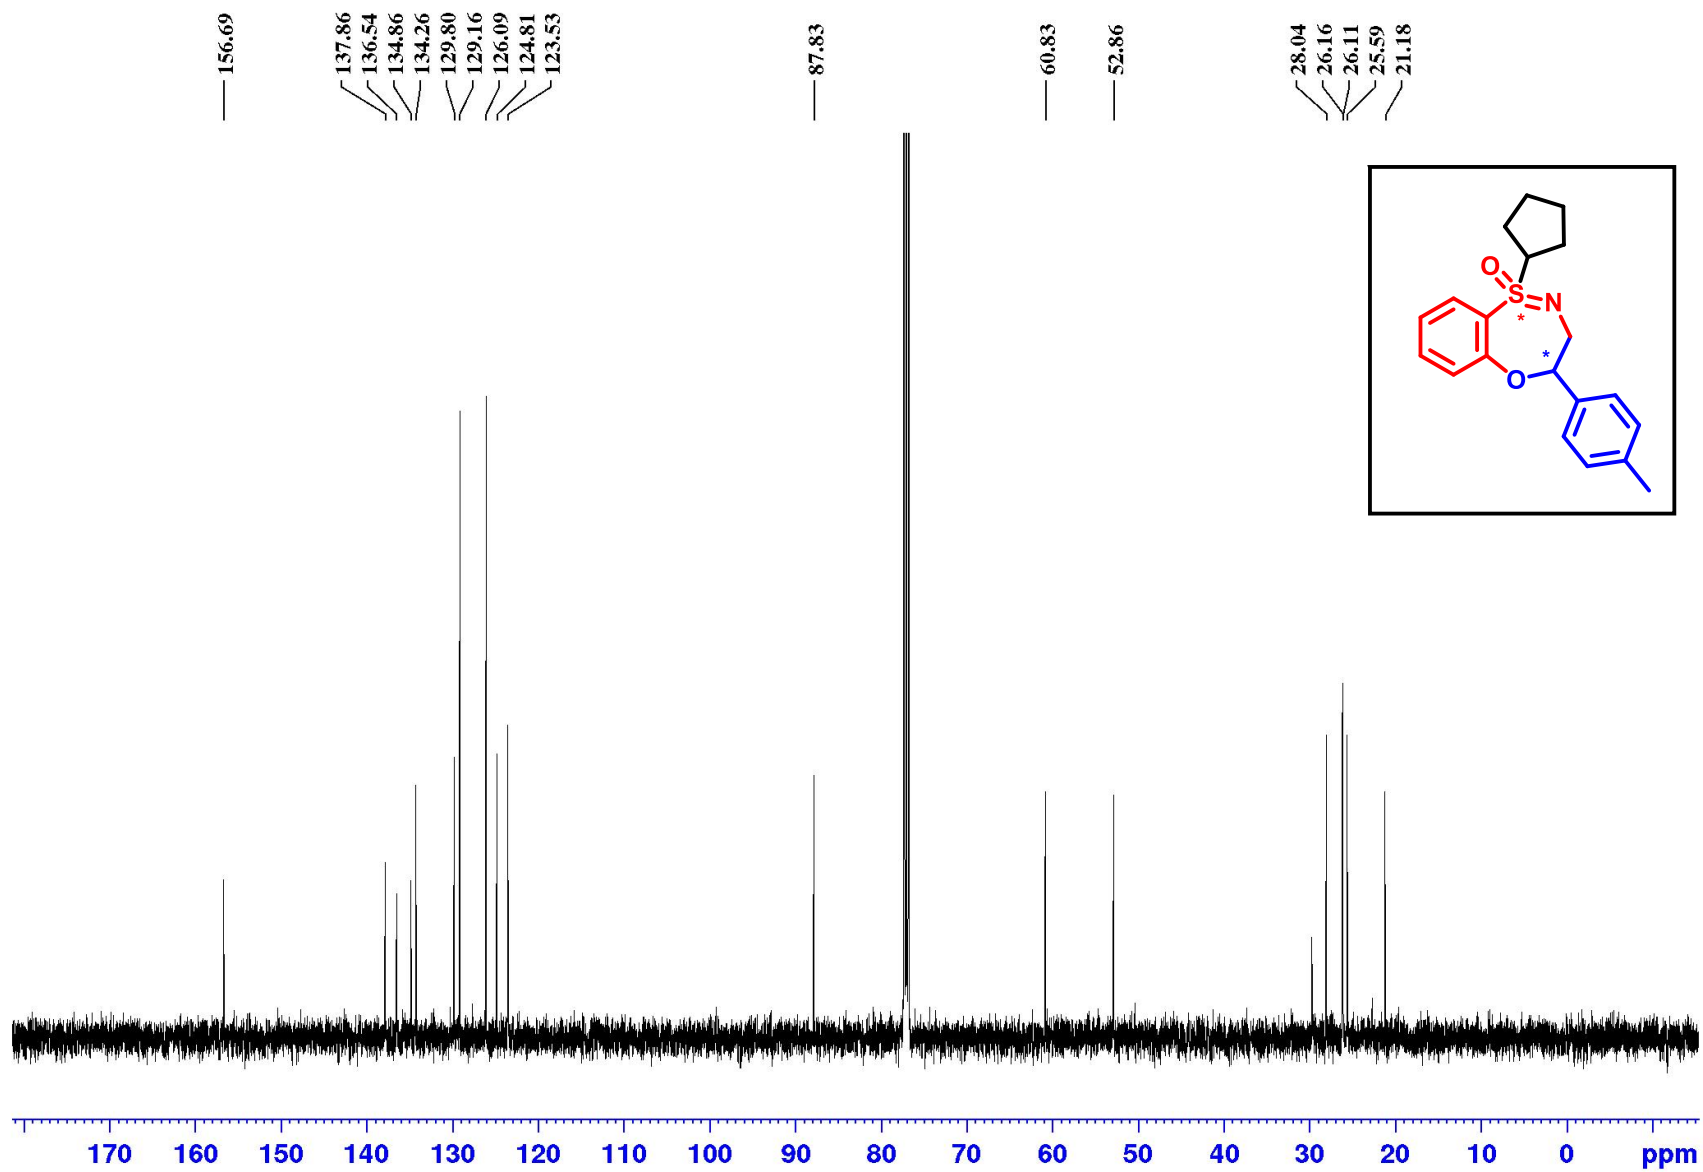

**Fig S-77:**  $^{13}\text{C}$  NMR Spectra of Compound 4j (100 MHz,  $\text{CDCl}_3$ )

## SAIF [HRMS Report]

|                   |                      |                       |                                  |
|-------------------|----------------------|-----------------------|----------------------------------|
| Data File:        | HRMS21I17MAR13       | Original Data Path:   | D:\INTERNAL NEW\2021\Mar<br>2021 |
| Sample ID:        | AB-167A              | Sample Name:          |                                  |
| Acquisition Date: | 03/17/21 11:28:07 AM | Run Time(min):        | 0.00                             |
| Vial:             | CStk1-01:13          | Injection Volume(μl): | 1.00                             |

HRMS21I17MAR13 #32-65 RT: 0.25-0.50 AV: 34 SB: 1 0.01 NL: 5.20E6  
T: FTMS + c ESI Full ms [100.00-750.00]

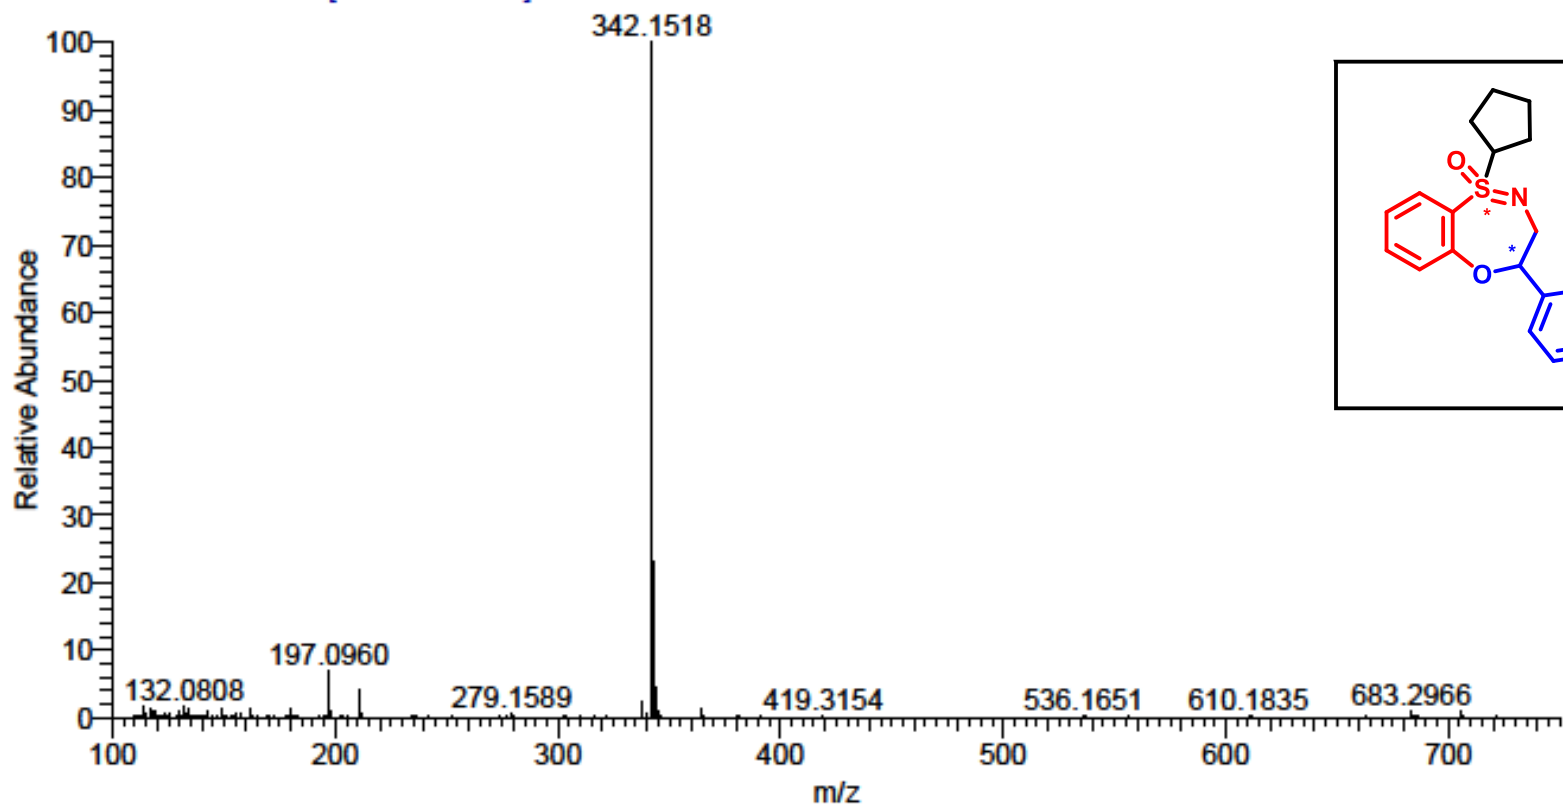

Fig S-78: HRMS report of Compound 4j

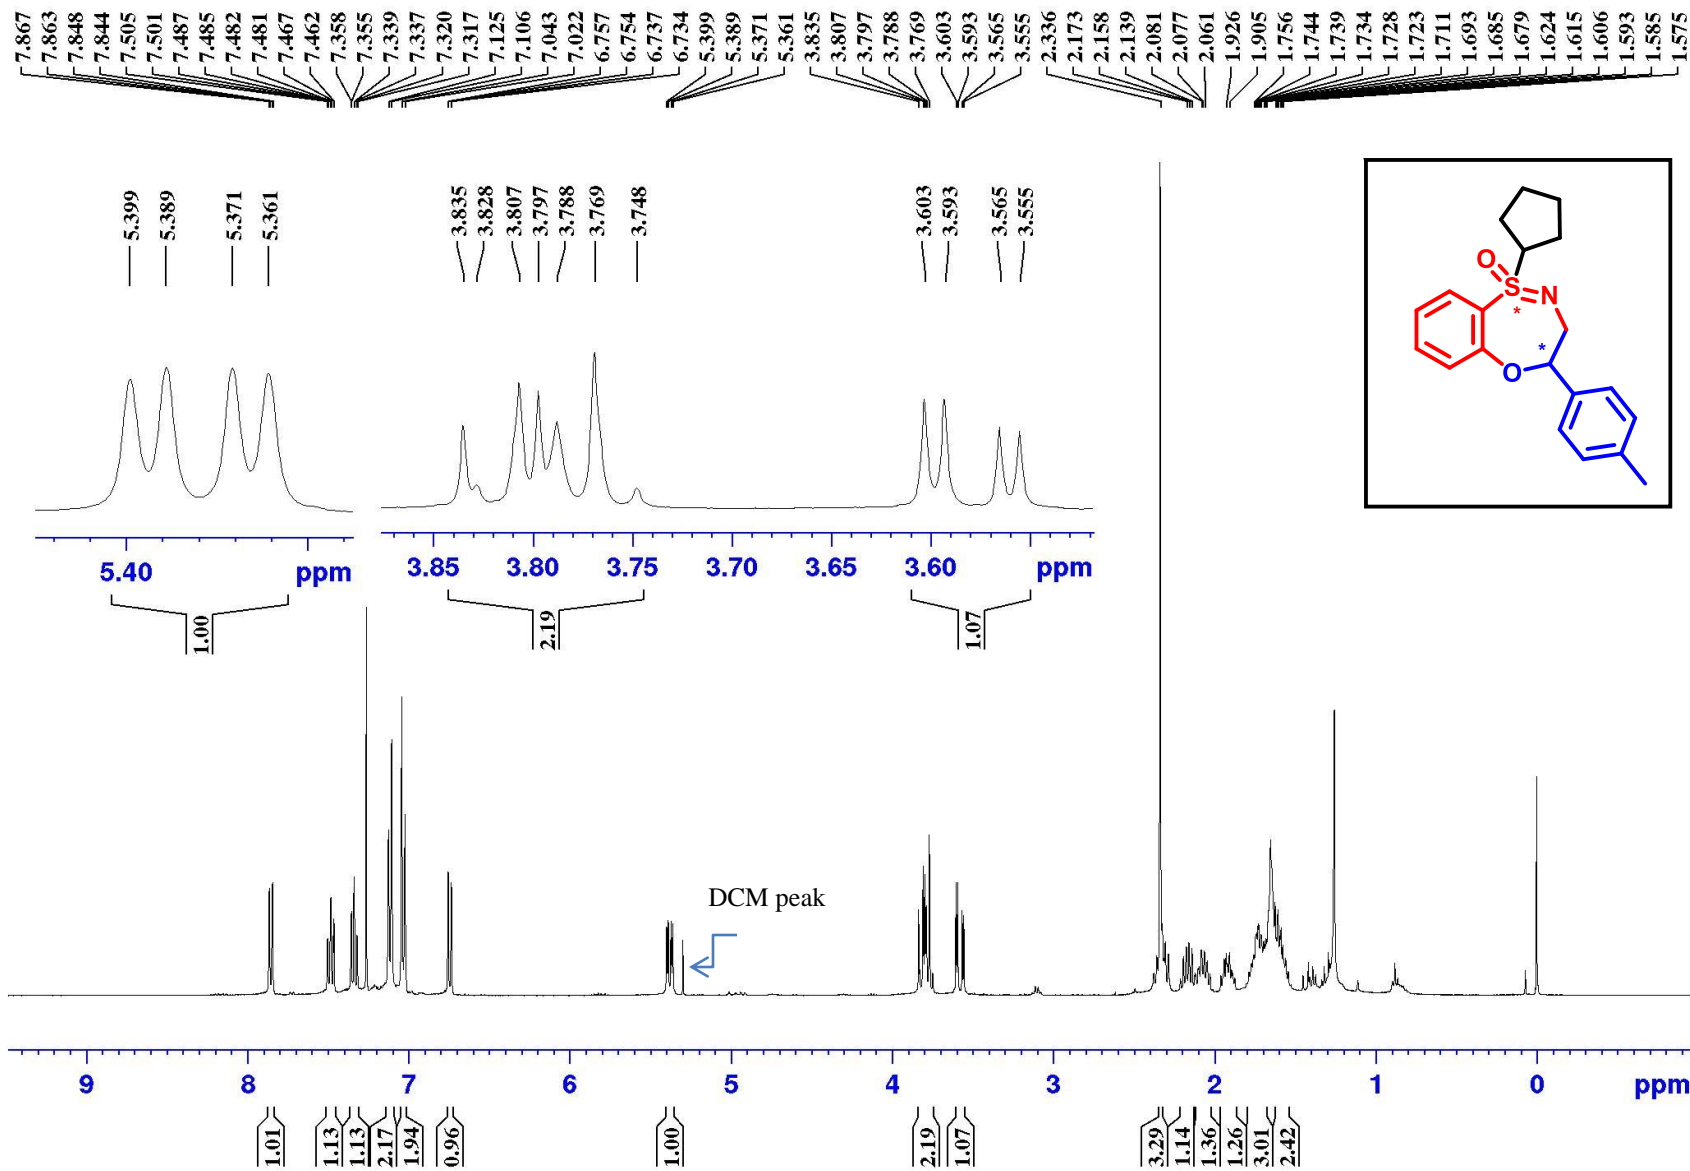

**Fig S-79:** <sup>1</sup>H NMR Spectra of Compound 4j' (400 MHz, CDCl<sub>3</sub>)

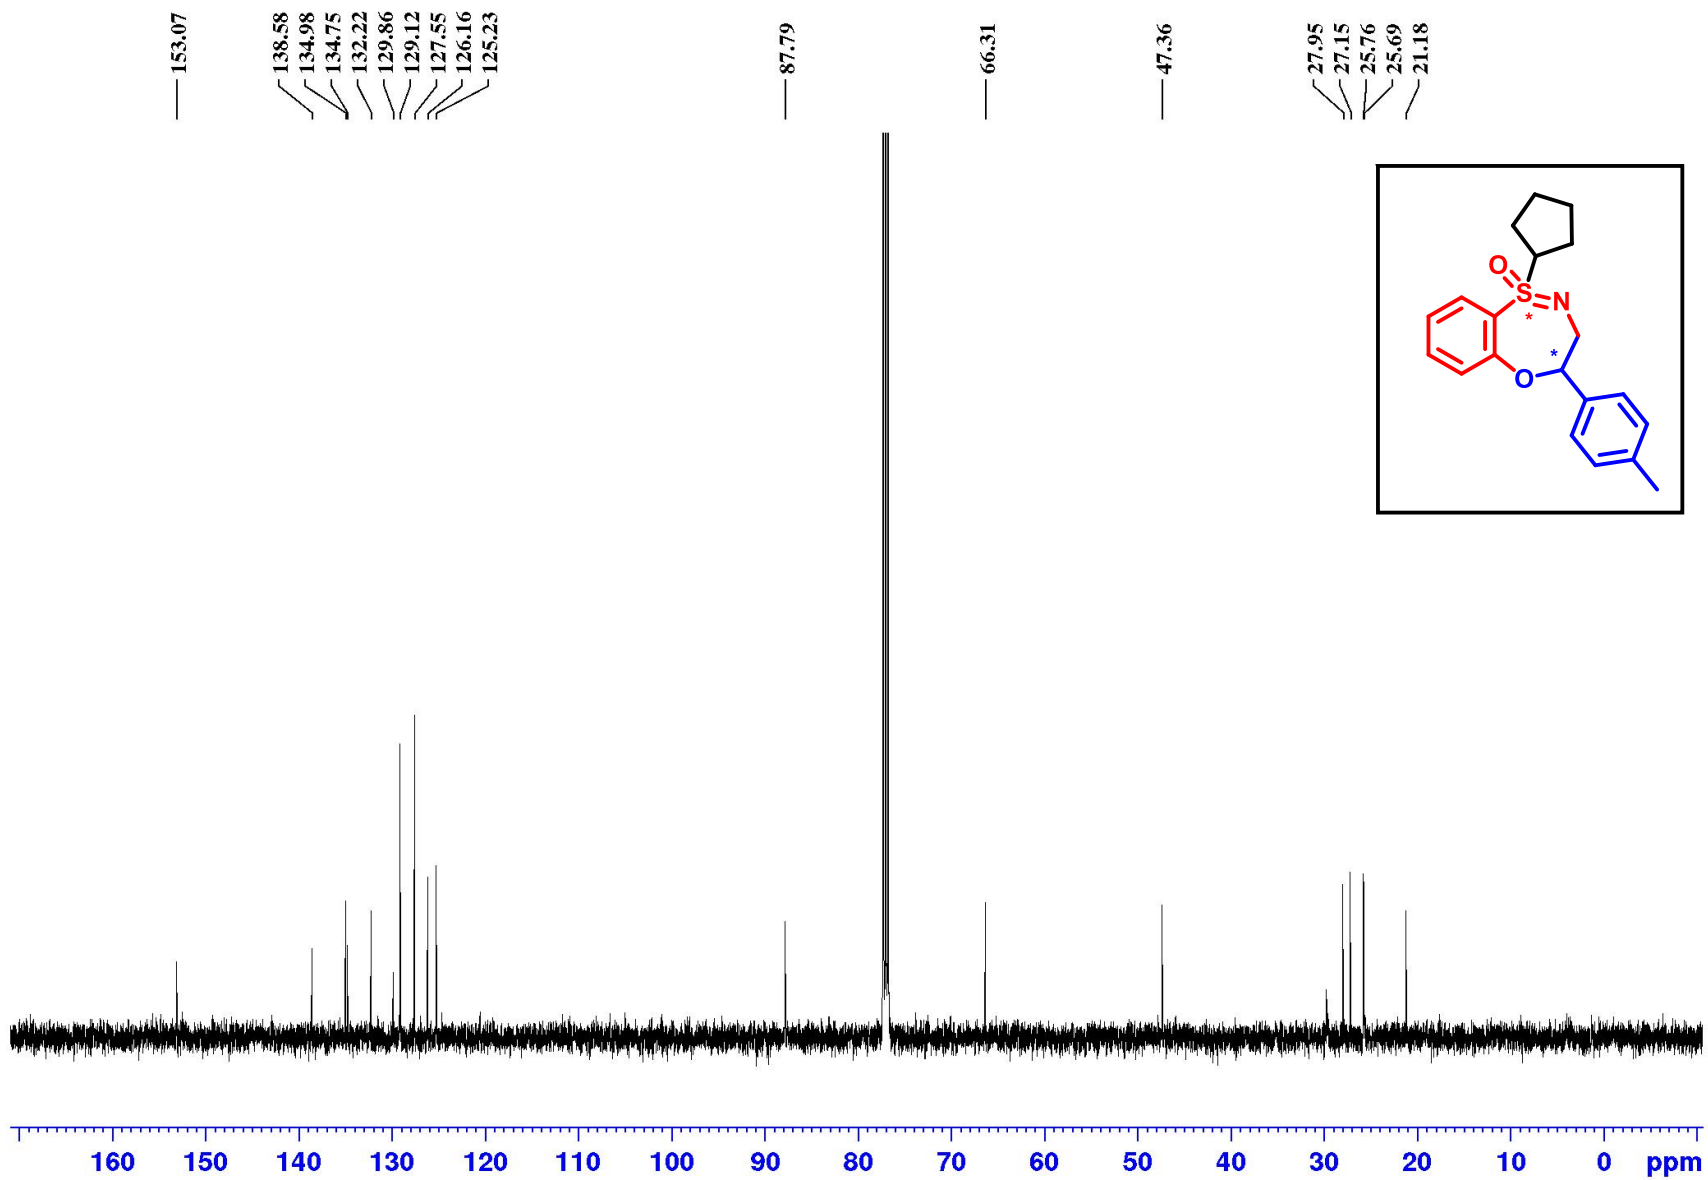

**Fig S-80:**  $^{13}\text{C}$  NMR Spectra of Compound **4j'** (100 MHz,  $\text{CDCl}_3$ )

## SAIF [HRMS Report]

|                   |                      |                       |                                  |
|-------------------|----------------------|-----------------------|----------------------------------|
| Data File:        | HRMS21I17MAR14       | Original Data Path:   | D:\INTERNAL NEW\2021\Mar<br>2021 |
| Sample ID:        | AB-167B              | Sample Name:          |                                  |
| Acquisition Date: | 03/17/21 11:30:06 AM | Run Time(min):        | 0.00                             |
| Vial:             | CStk1-01:14          | Injection Volume(μl): | 1.00                             |

HRMS21I17MAR14 #32-65 RT: 0.25-0.50 AV: 34 SB: 1 0.01 NL: 4.71E6  
T: FTMS + c ESI Full ms [100.00-750.00]

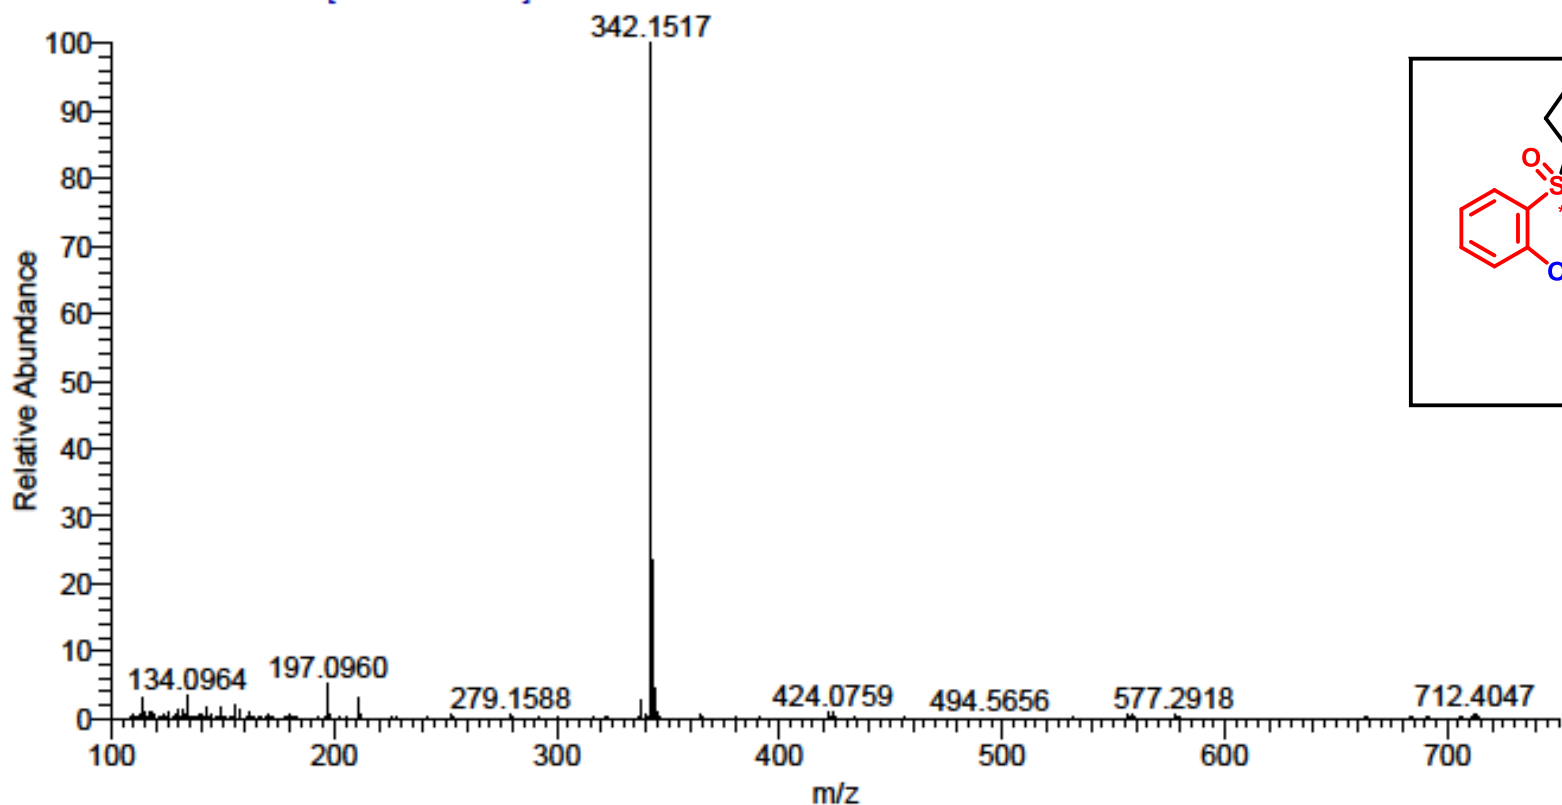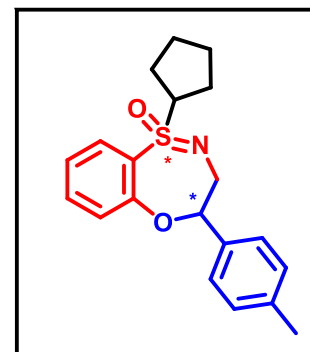

Fig S-81: HRMS report of Compound 4j'

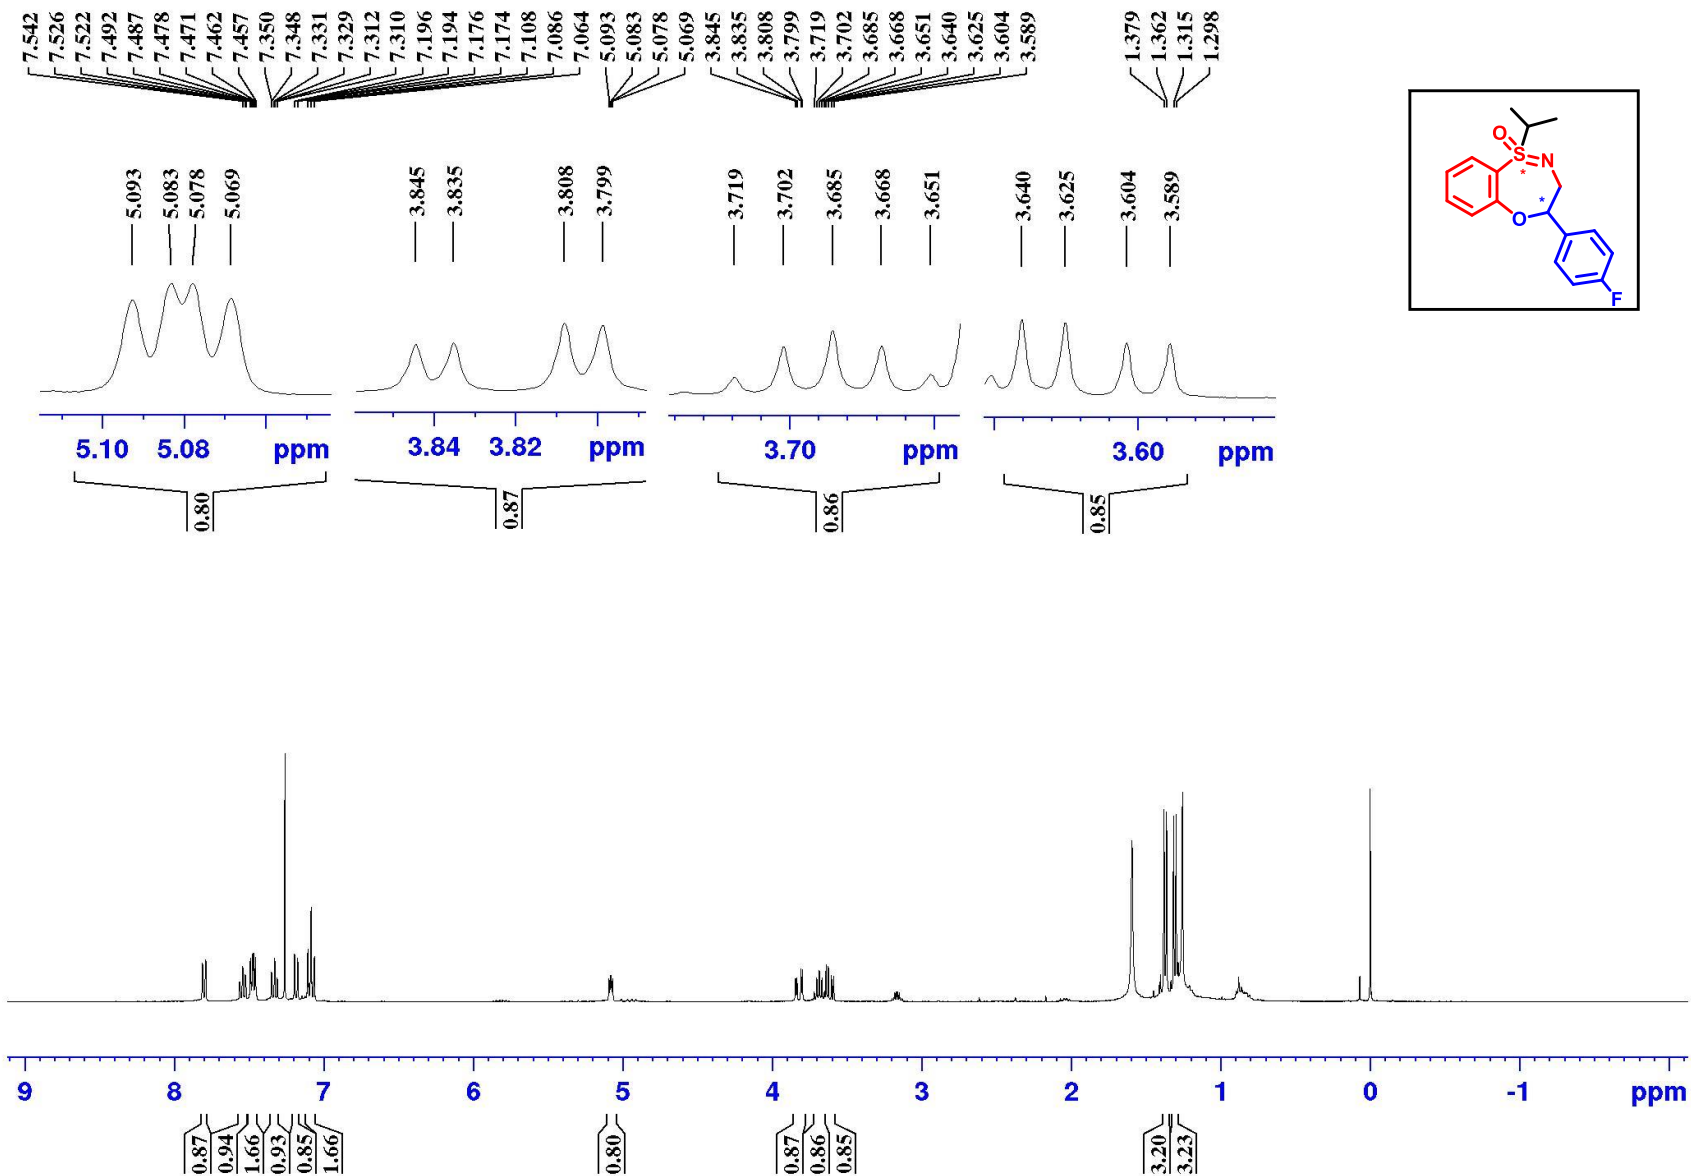

**Fig S-82:**  $^1\text{H}$  NMR Spectra of Compound **4k** (400 MHz,  $\text{CDCl}_3$ )

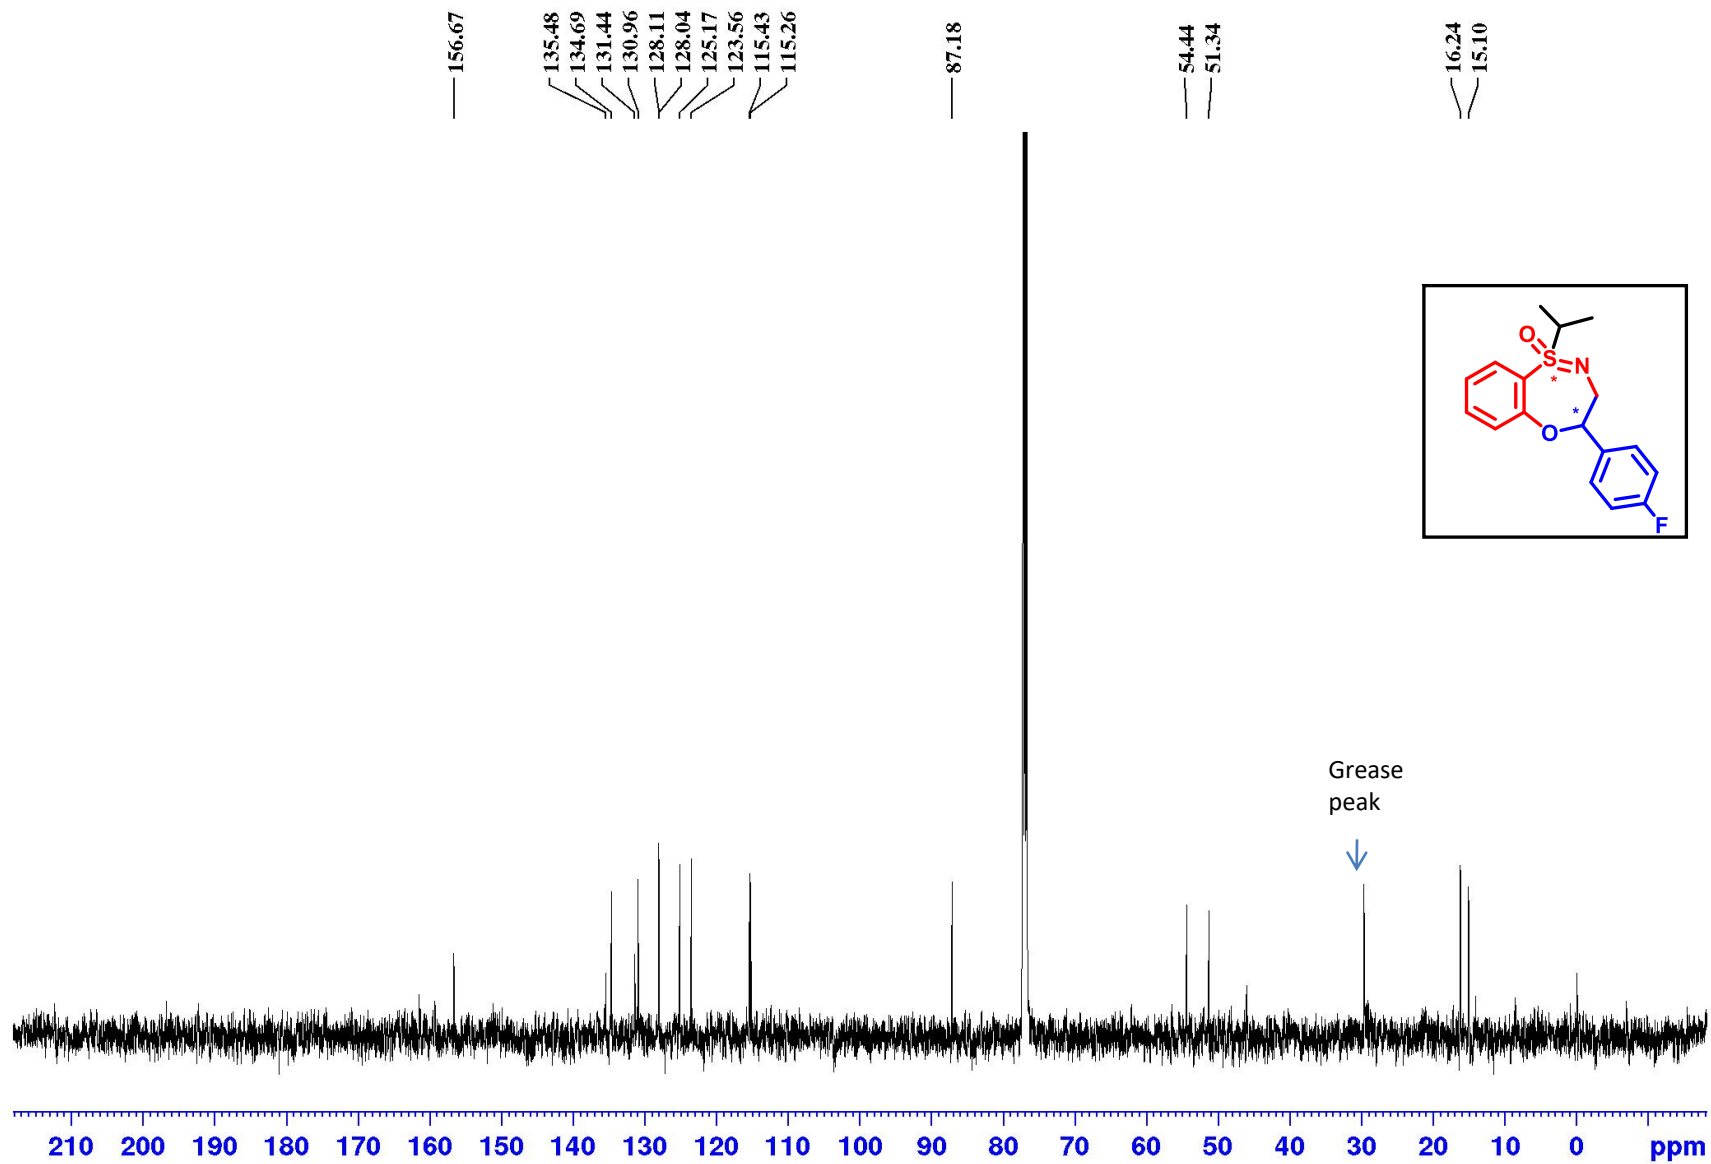

**Fig S-83:**  $^{13}\text{C}$  NMR Spectra of Compound **4k** (125 MHz,  $\text{CDCl}_3$ )



## SAIF [HRMS Report]

|                   |                      |                       |                                    |
|-------------------|----------------------|-----------------------|------------------------------------|
| Data File:        | HRMS21I05APR01       | Original Data Path:   | D:\INTERNAL NEW\2021\April<br>2021 |
| Sample ID:        | AB-169A              | Sample Name:          |                                    |
| Acquisition Date: | 04/05/21 11:37:20 AM | Run Time(min):        | 0.00                               |
| Vial:             | CStk1-01:01          | Injection Volume(ul): | 1.00                               |

HRMS21I05APR01 #34-68 RT: 0.25-0.50 AV: 35 SB: 1 0.01 NL: 3.69E6  
T: FTMS + c ESI Full ms [100.00-750.00]

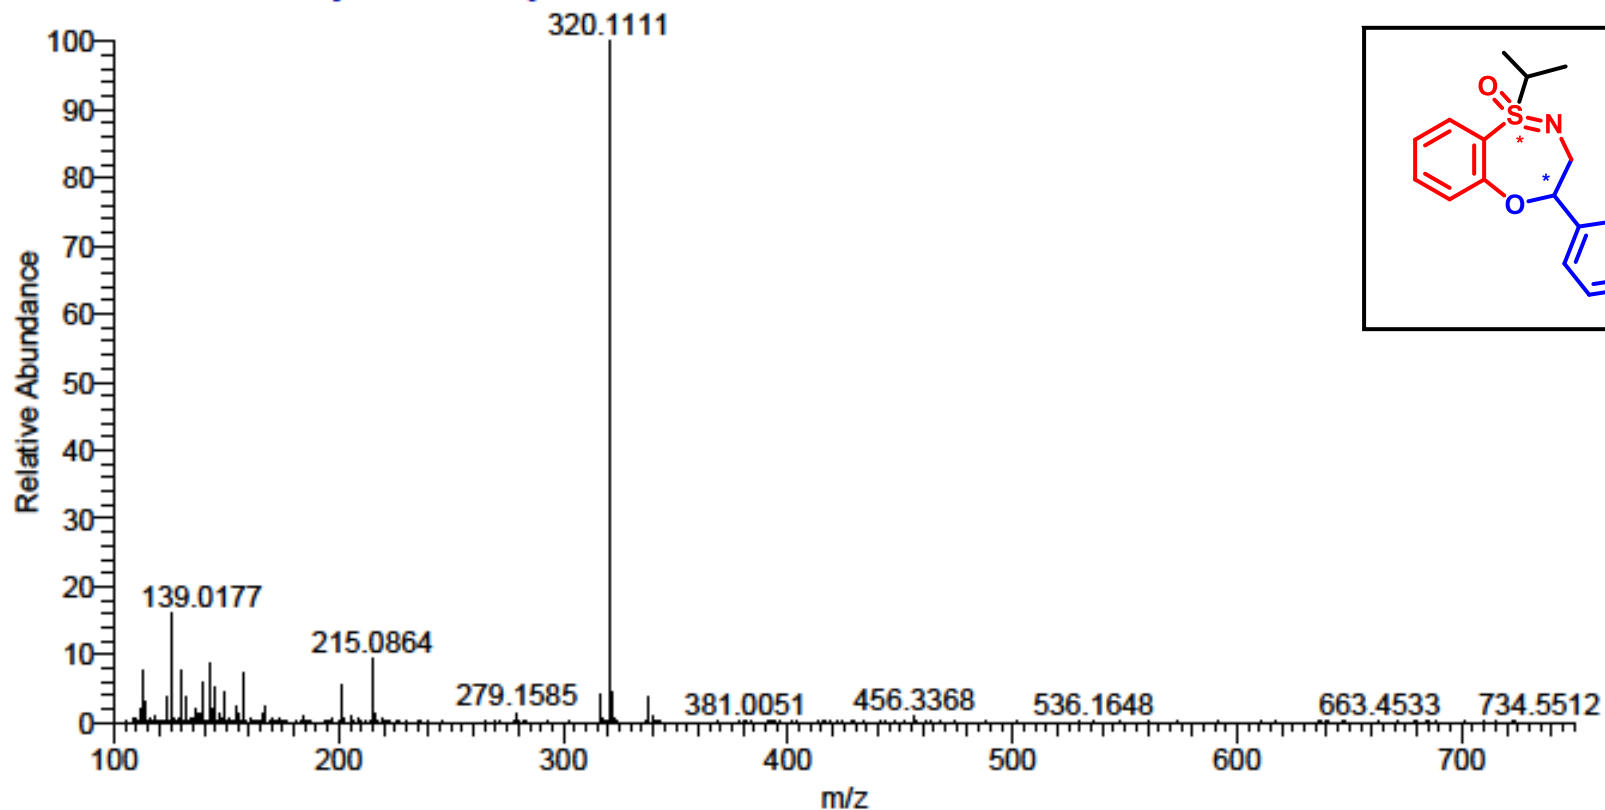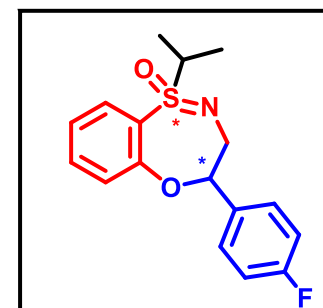

Fig S-84: HRMS report of Compound 4k

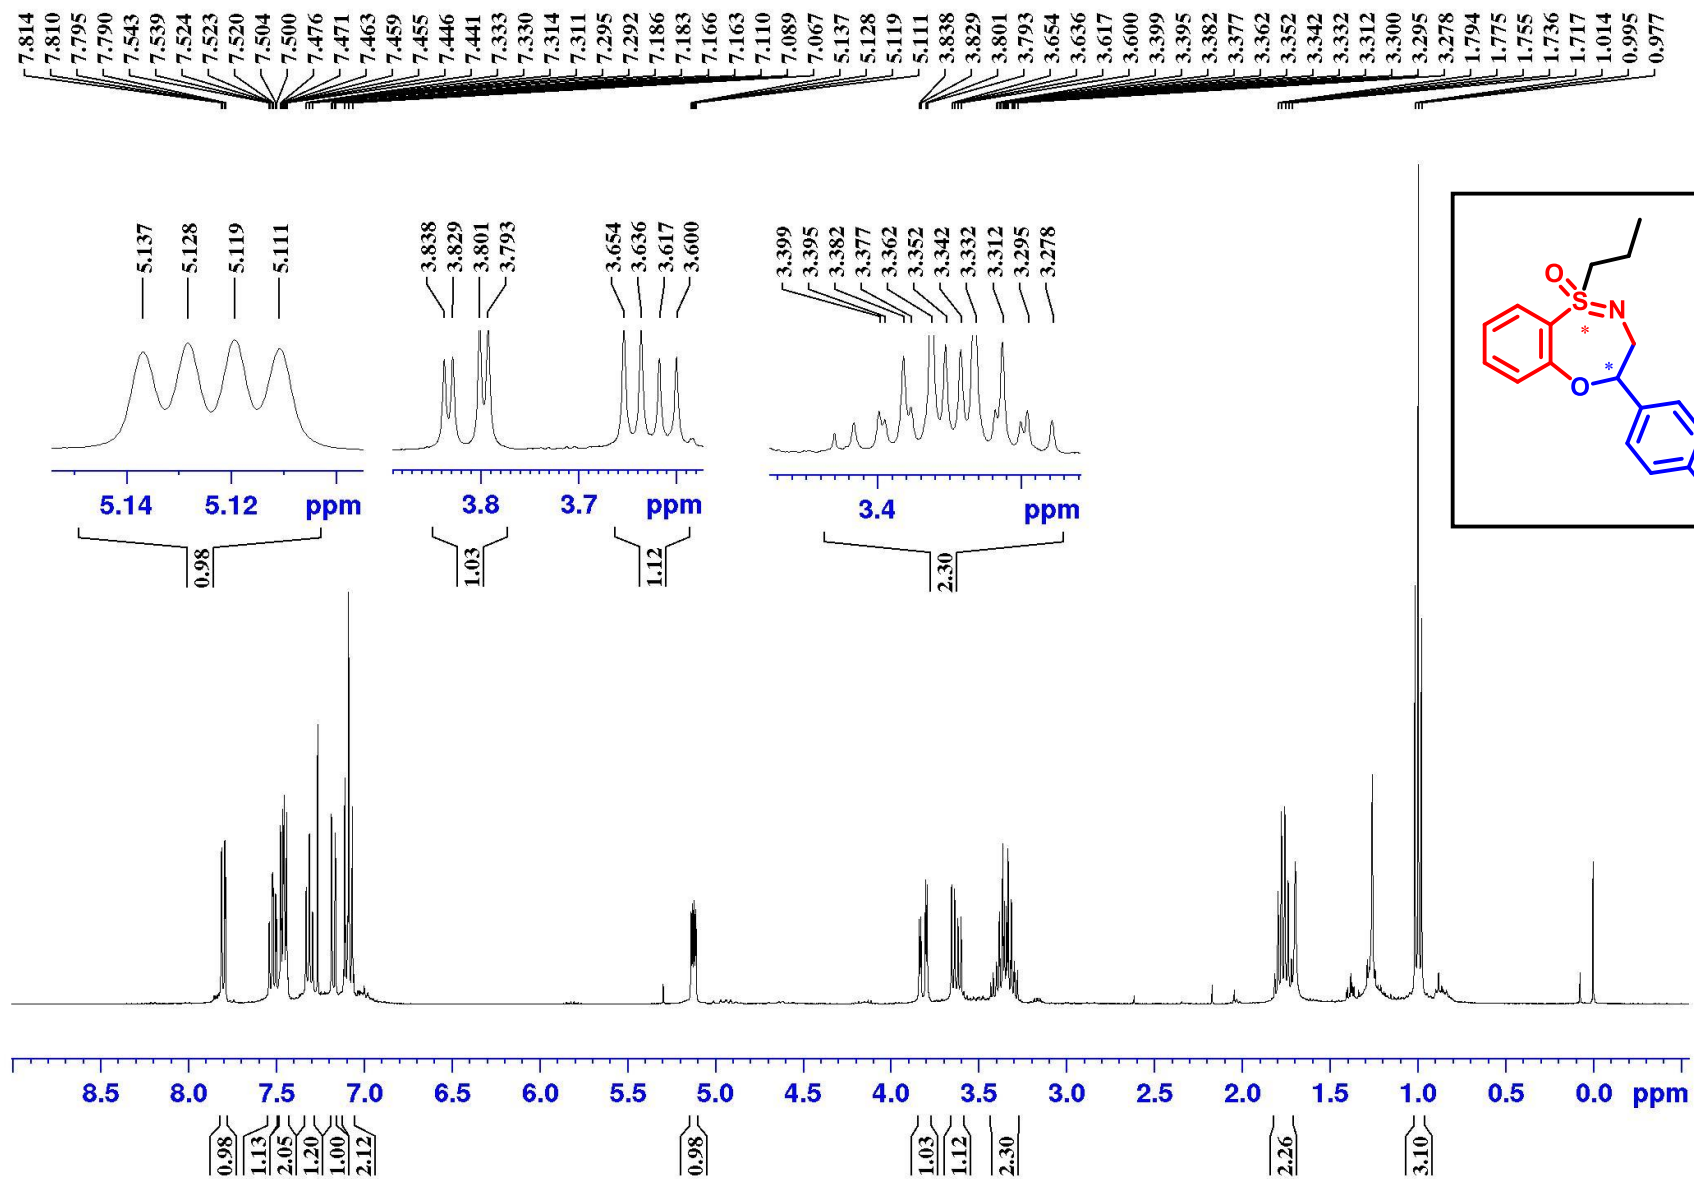

**Fig S-85:**  $^1\text{H}$  NMR Spectra of Compound **41** (400 MHz,  $\text{CDCl}_3$ )

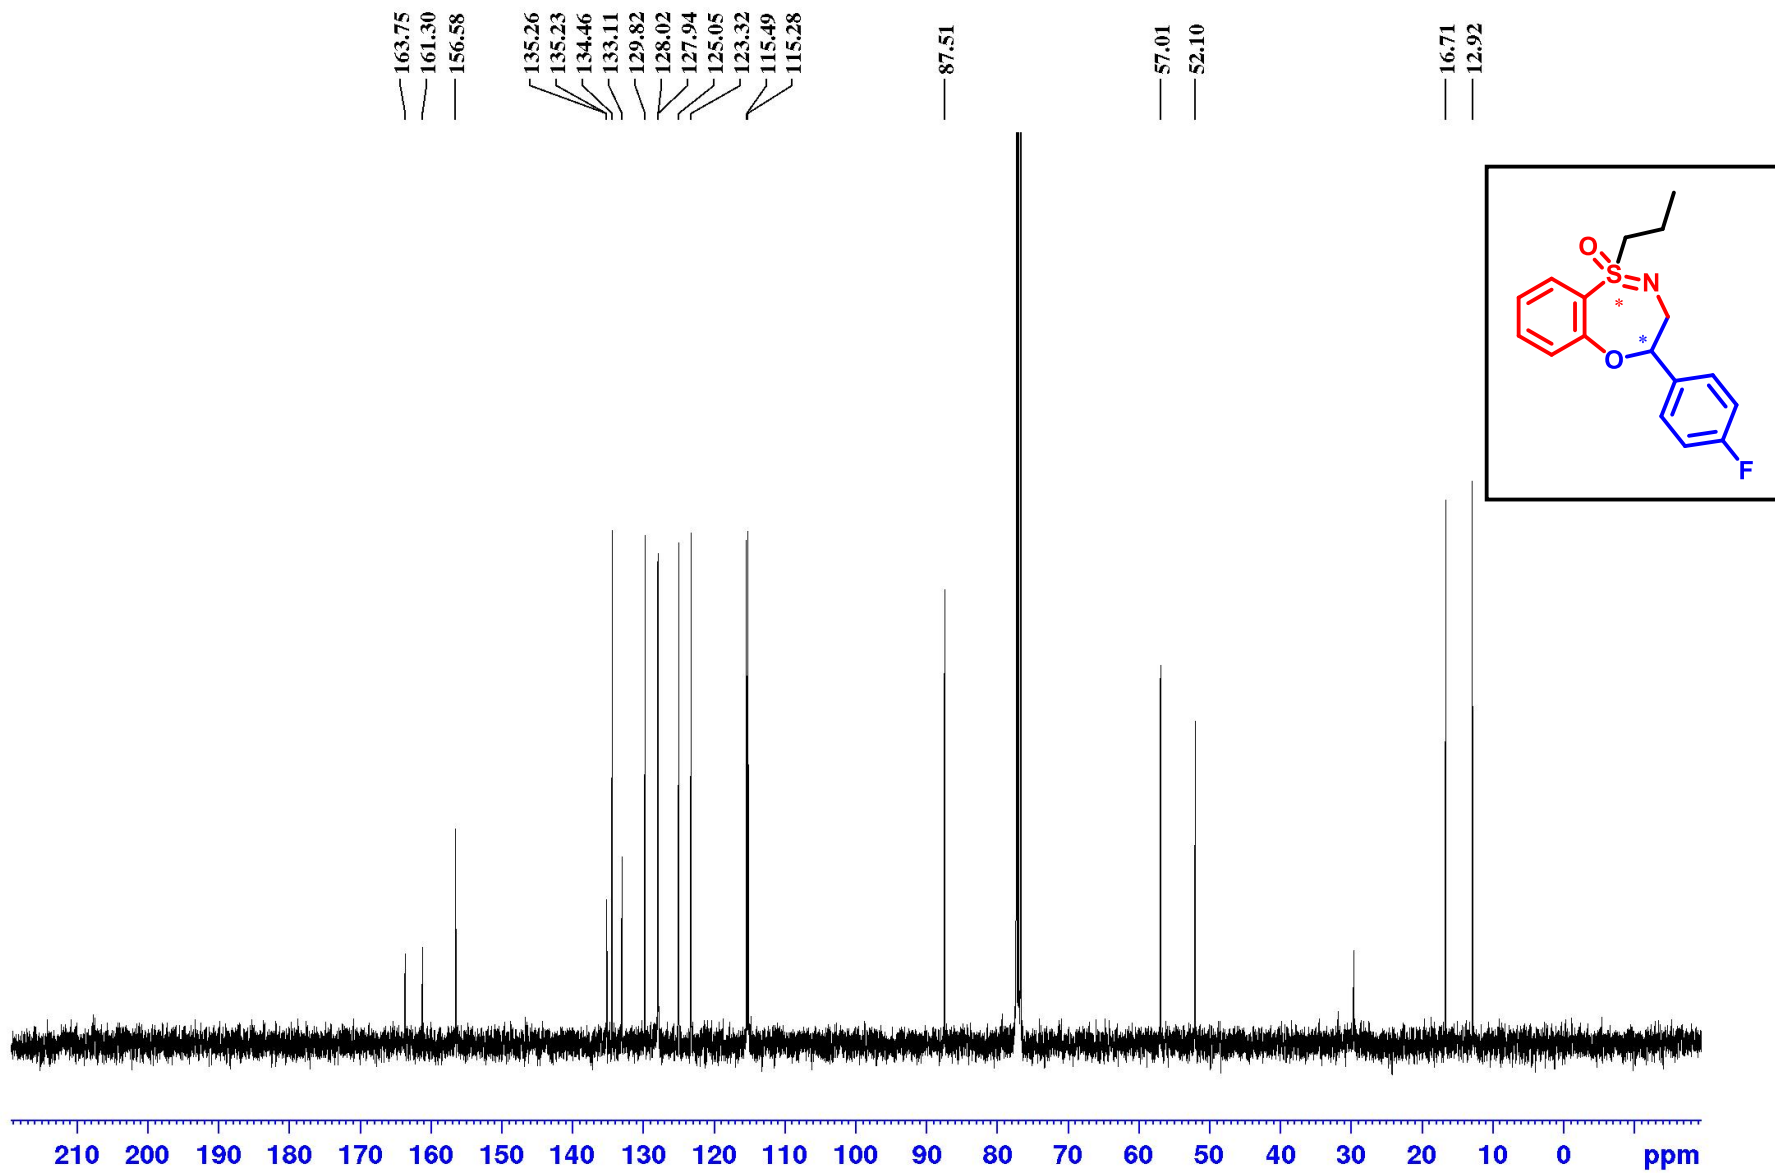

**Fig S-86:**  $^{13}\text{C}$  NMR Spectra of Compound **41** (100 MHz,  $\text{CDCl}_3$ )

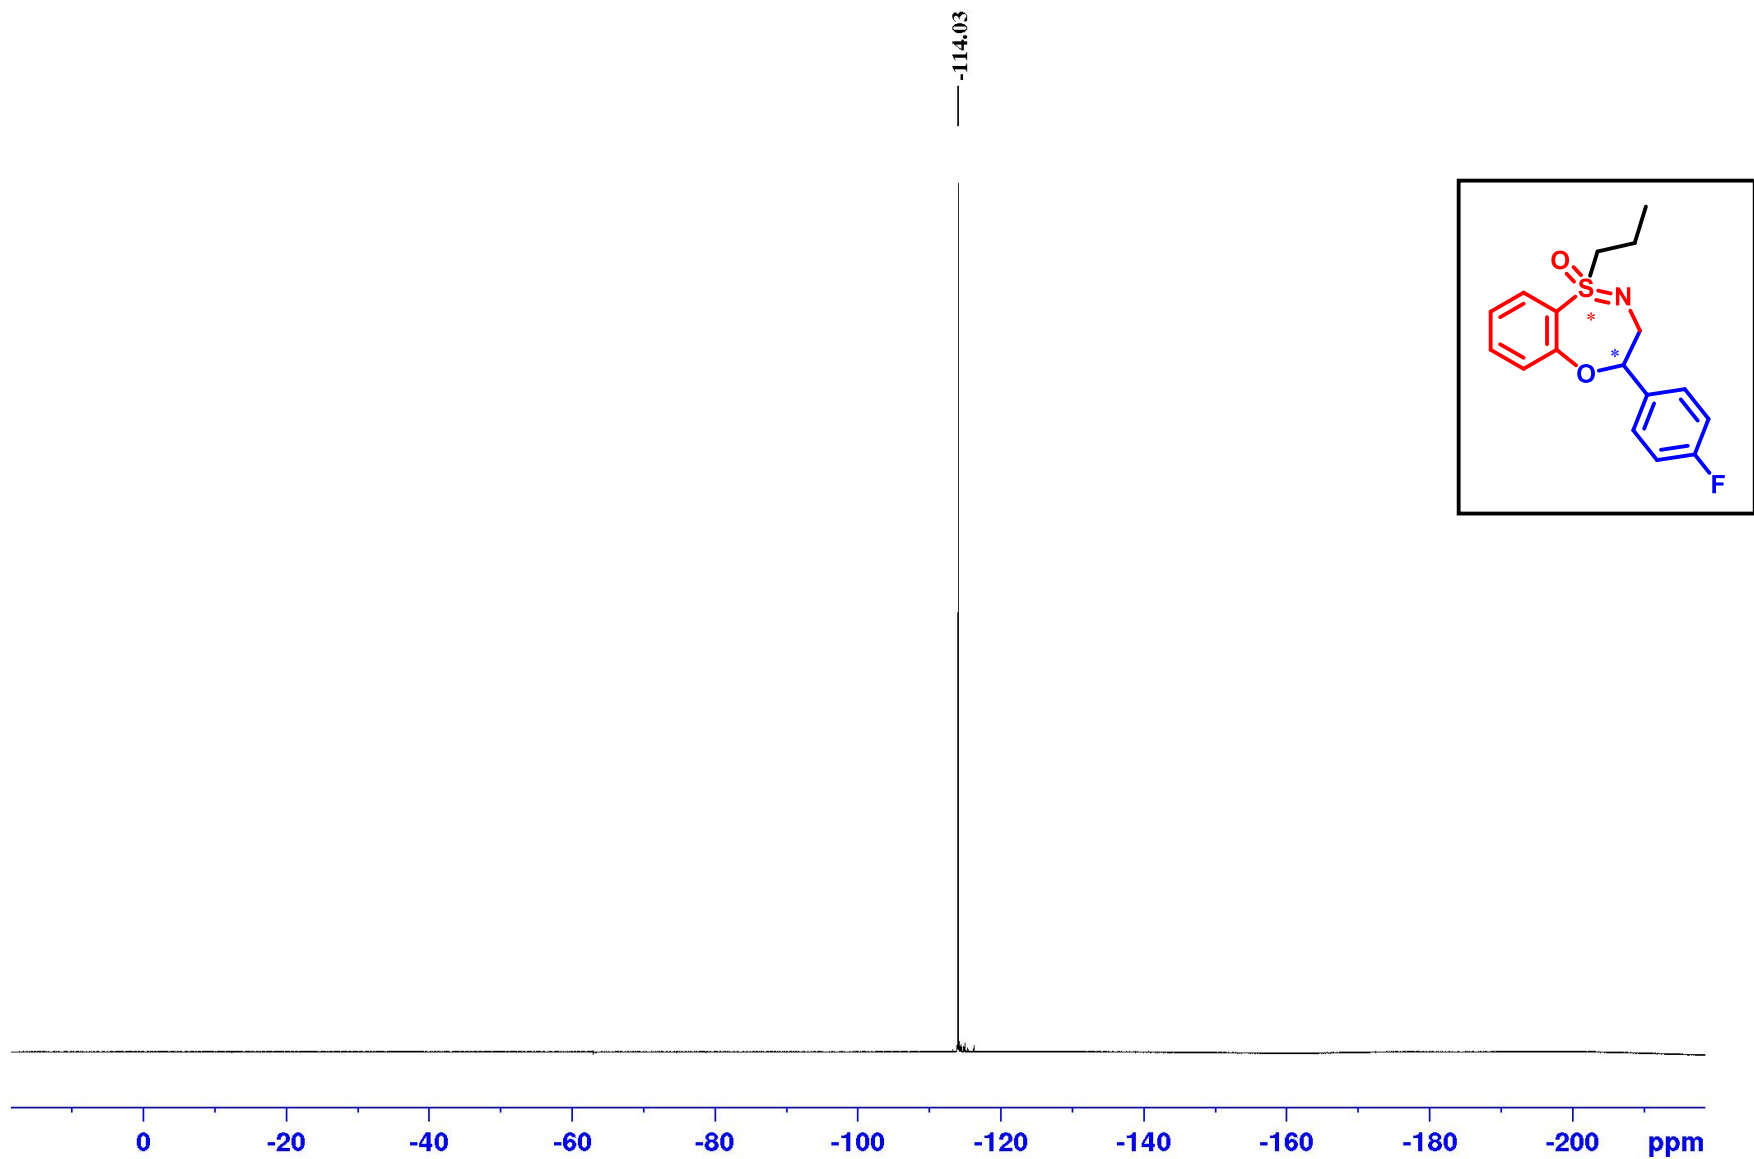

**Fig S-87:**  $^{19}\text{F}$  NMR Spectra of Compound 41 (376 MHz,  $\text{CDCl}_3$ )

## SAIF [HRMS Report]

|                   |                      |                       |                                  |
|-------------------|----------------------|-----------------------|----------------------------------|
| Data File:        | HRMS21I30MAR04       | Original Data Path:   | D:\INTERNAL NEW\2021\Mar<br>2021 |
| Sample ID:        | AB-171A              | Sample Name:          |                                  |
| Acquisition Date: | 03/30/21 11:58:20 AM | Run Time(min):        | 0.00                             |
| Vial:             | CStk1-01:4           | Injection Volume(μl): | 1.00                             |

HRMS21I30MAR04 #33-66 RT: 0.25-0.50 AV: 34 SB: 1 0.01 NL: 7.38E6  
T: FTMS + c ESI Full ms [100.00-750.00]

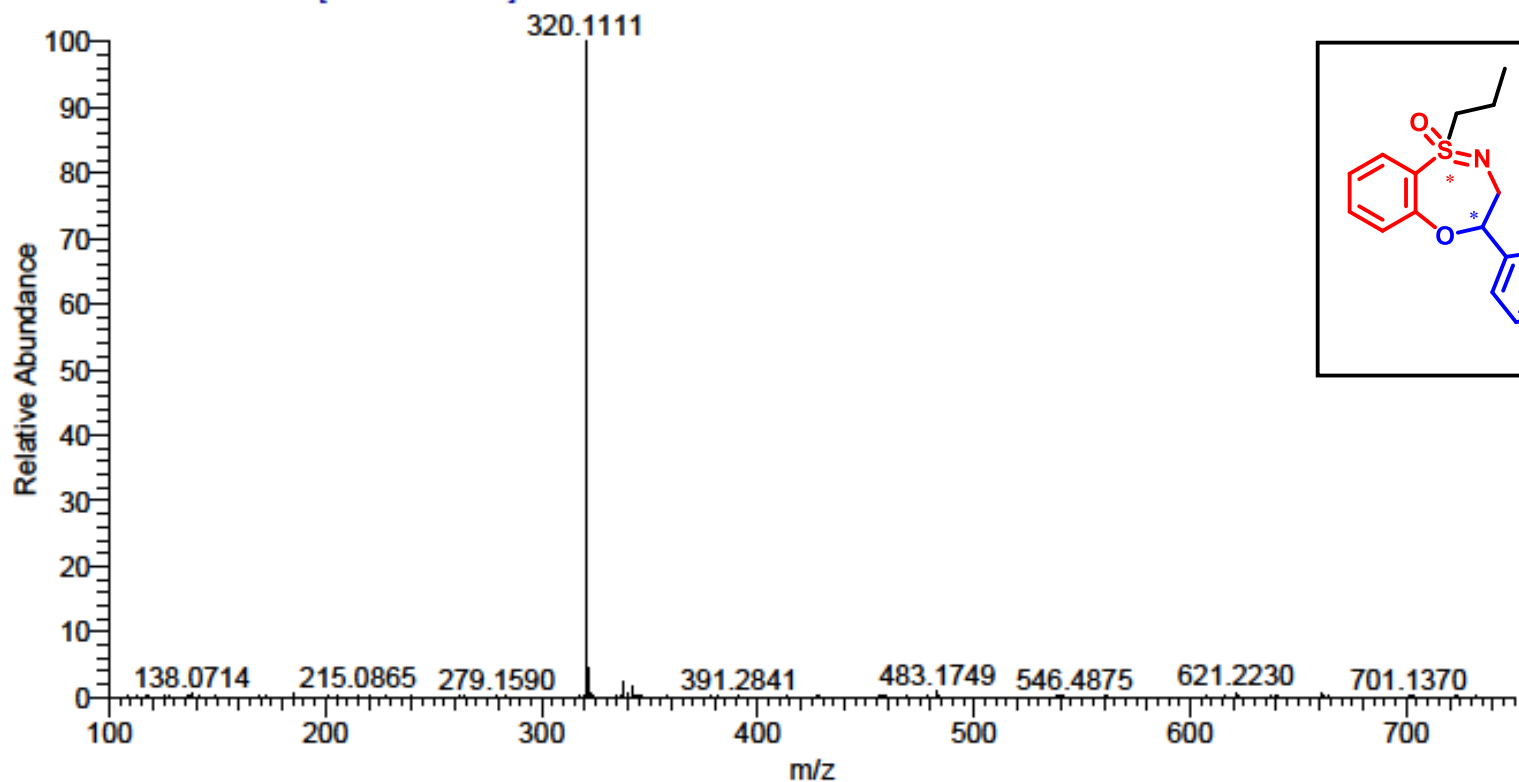

Fig S-88: HRMS report of Compound 4l

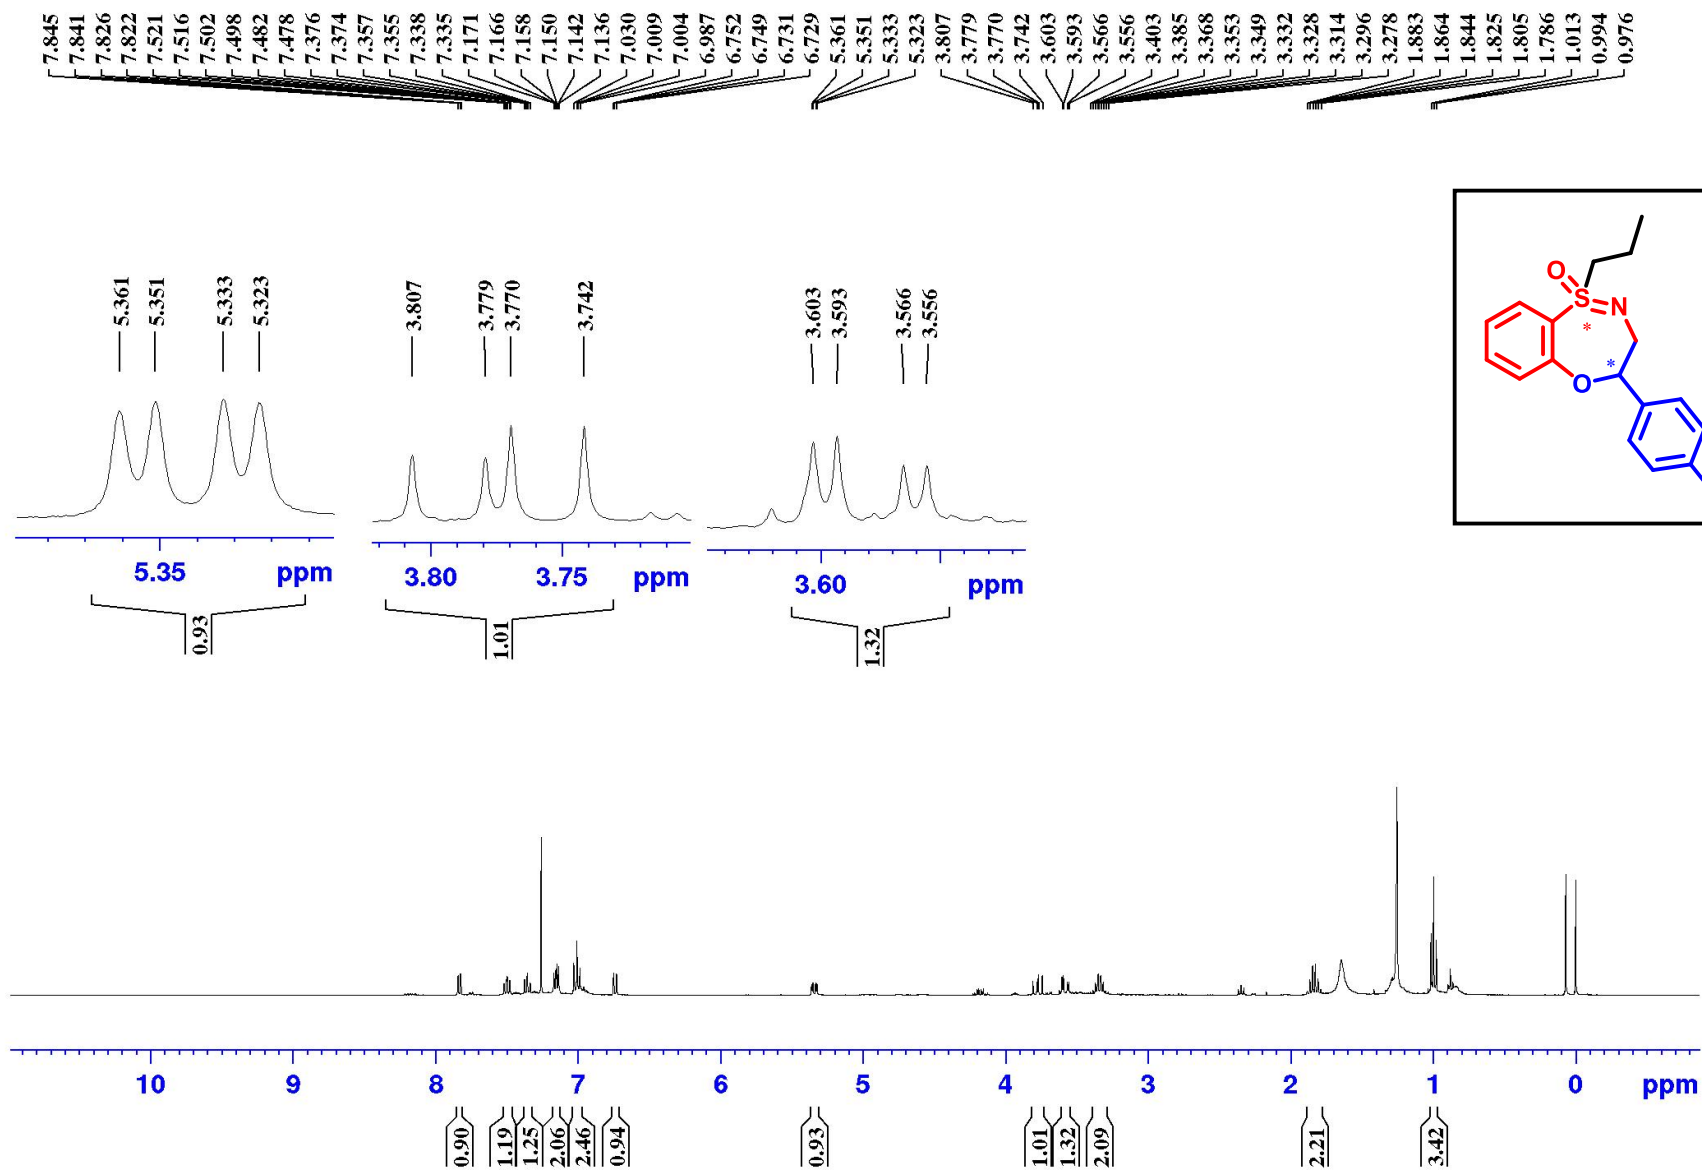

**Fig S-89:** <sup>1</sup>H NMR Spectra of Compound 4I' (400 MHz, CDCl<sub>3</sub>)

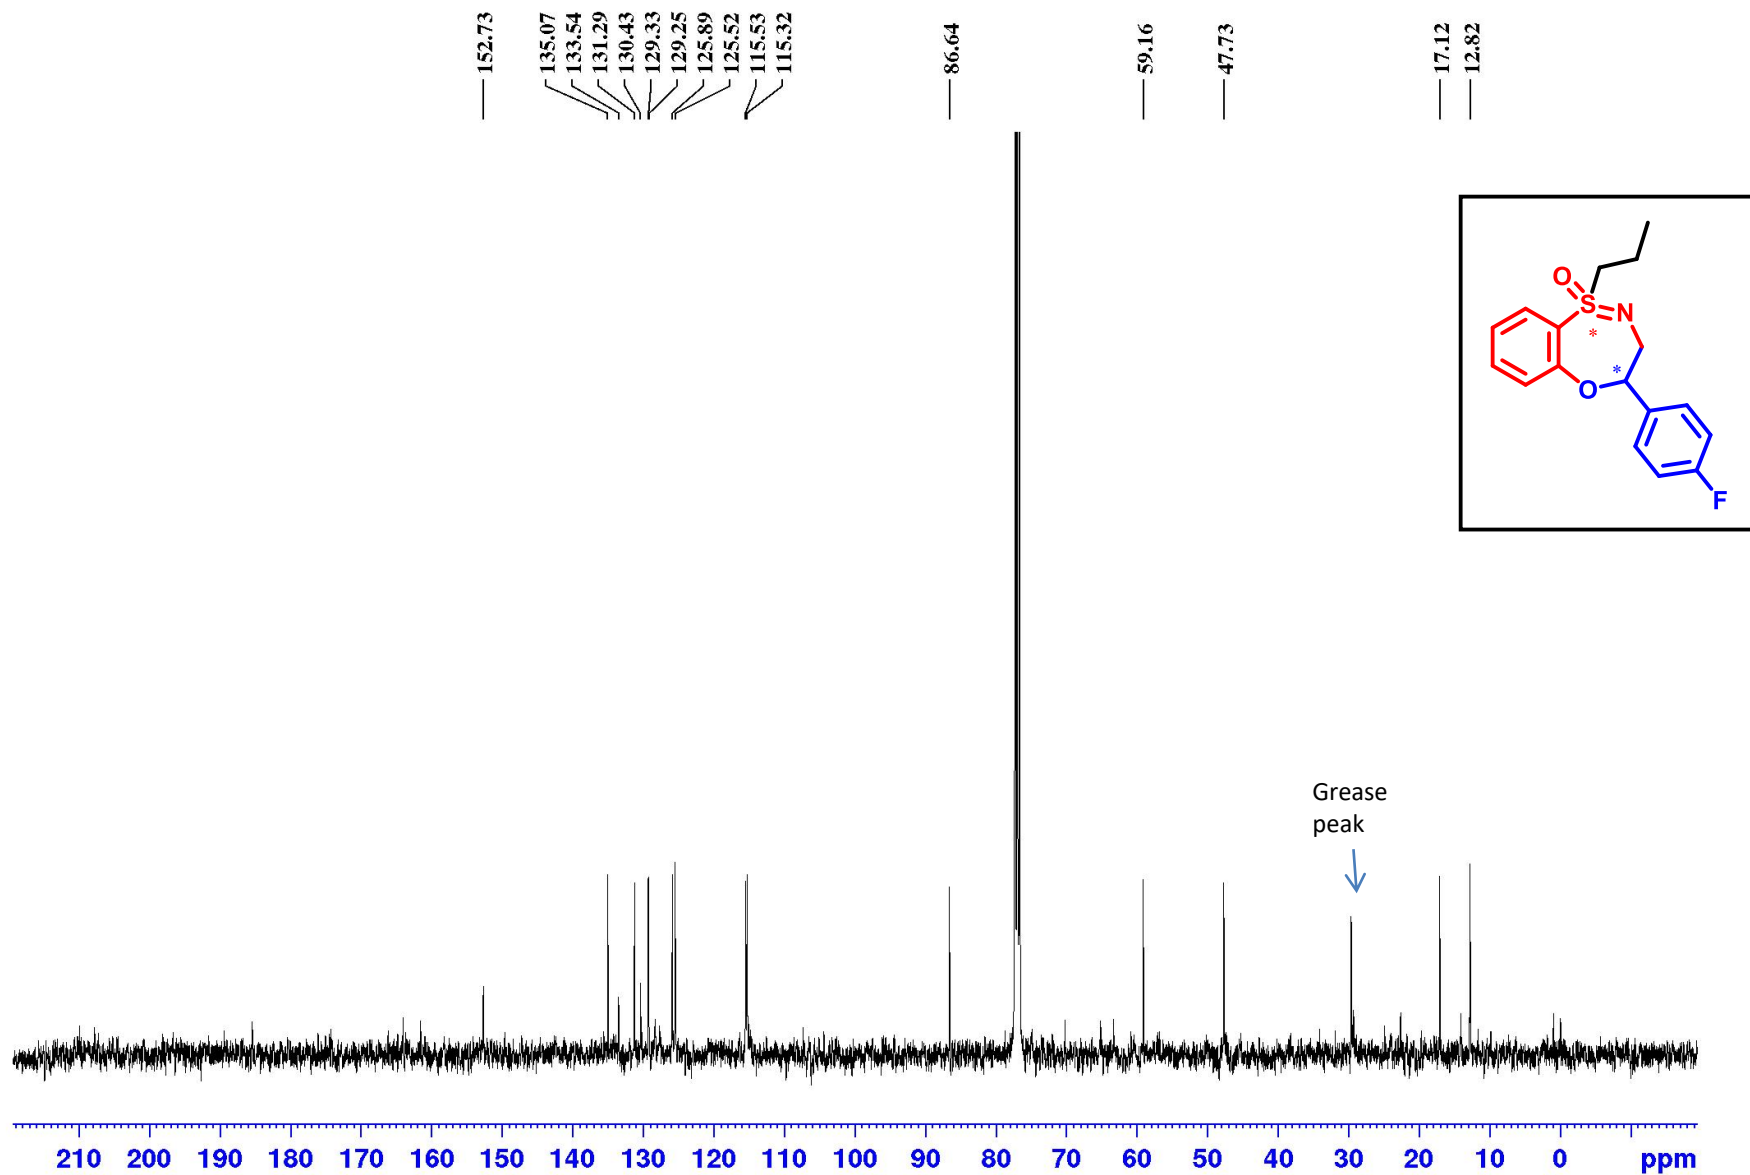

**Fig S-90:**  $^{13}\text{C}$  NMR Spectra of Compound 4I' (100 MHz,  $\text{CDCl}_3$ )

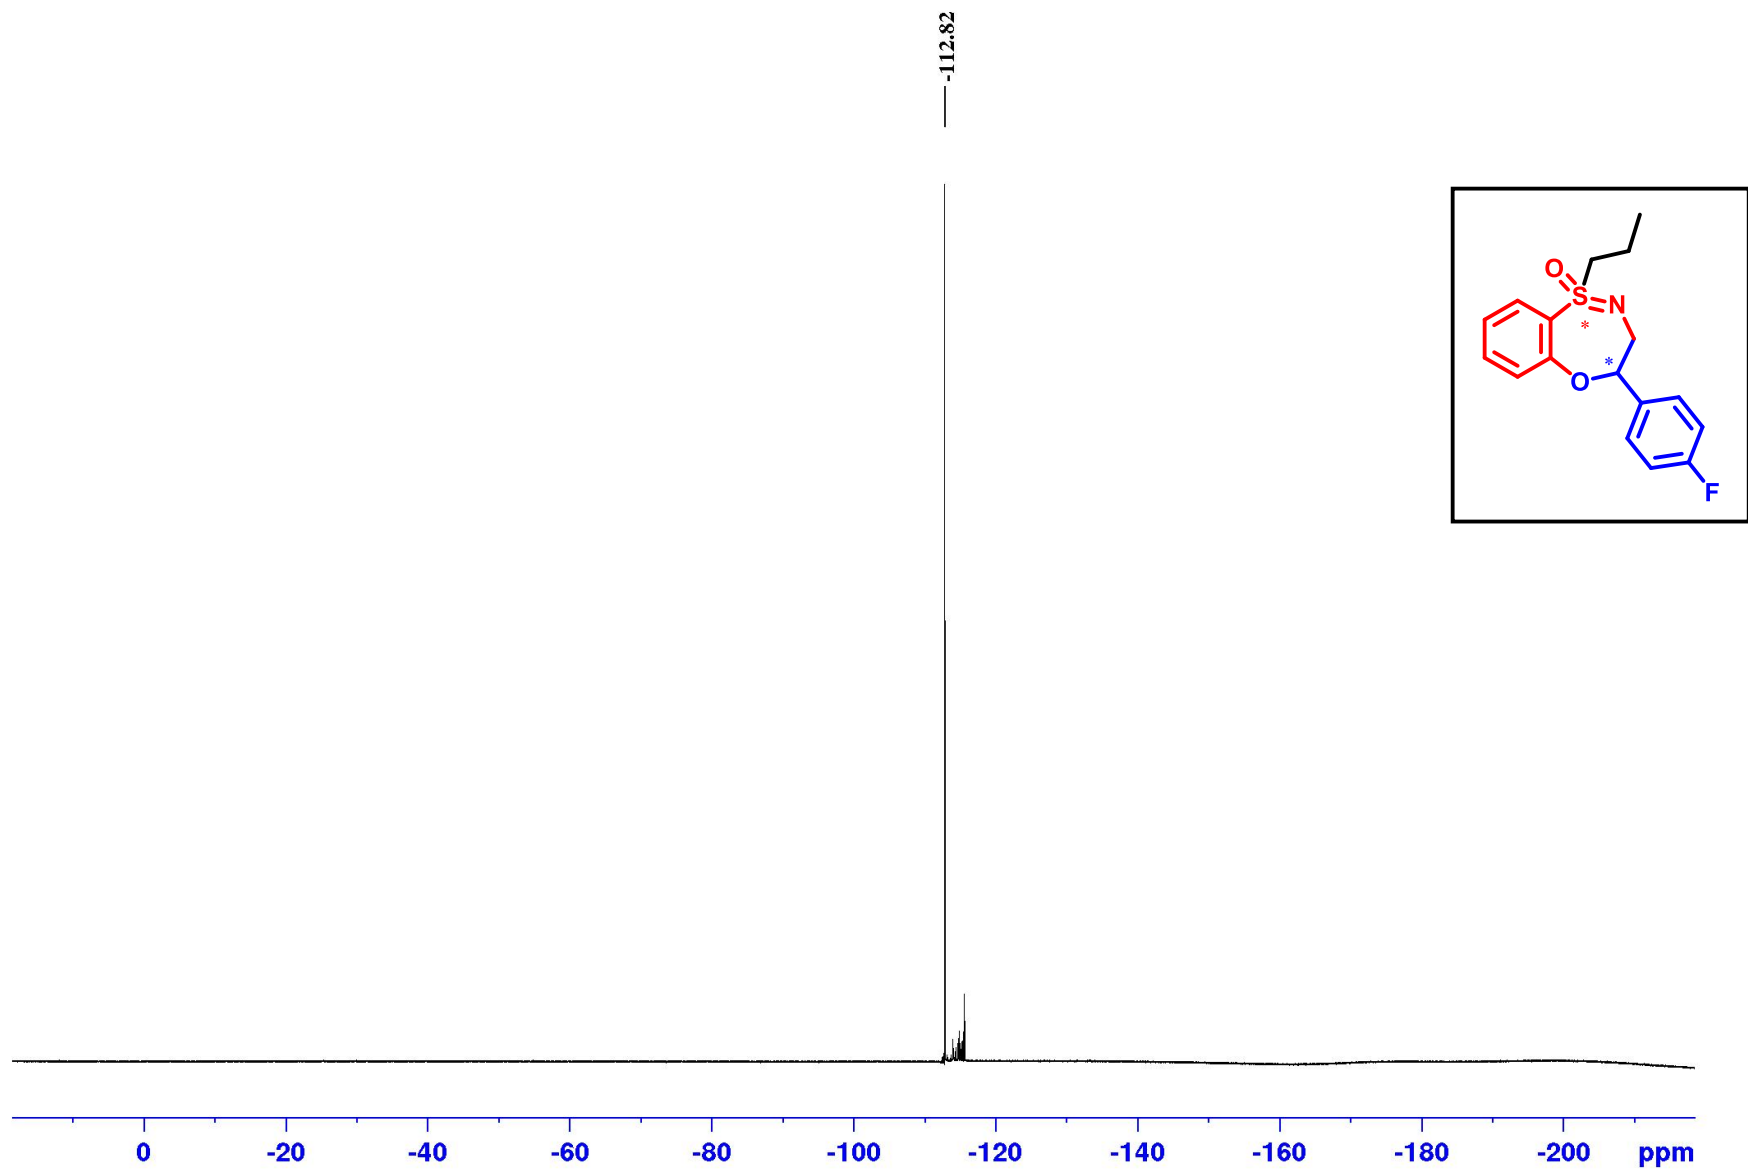

**Fig S-91:**  $^{19}\text{F}$  NMR Spectra of Compound 4I' (376 MHz,  $\text{CDCl}_3$ )



## SAIF [HRMS Report]

|                   |                      |                       |                                  |
|-------------------|----------------------|-----------------------|----------------------------------|
| Data File:        | HRMS21I30MAR05       | Original Data Path:   | D:\INTERNAL NEW\2021\Mar<br>2021 |
| Sample ID:        | AB-171B              | Sample Name:          |                                  |
| Acquisition Date: | 03/30/21 12:00:18 PM | Run Time(min):        | 0.00                             |
| Vial:             | CStk1-01:5           | Injection Volume(μl): | 1.00                             |

HRMS21I30MAR05 #33-66 RT: 0.25-0.50 AV: 34 SB: 1 0.01 NL: 4.51E6  
T: FTMS + c ESI Full ms [100.00-750.00]

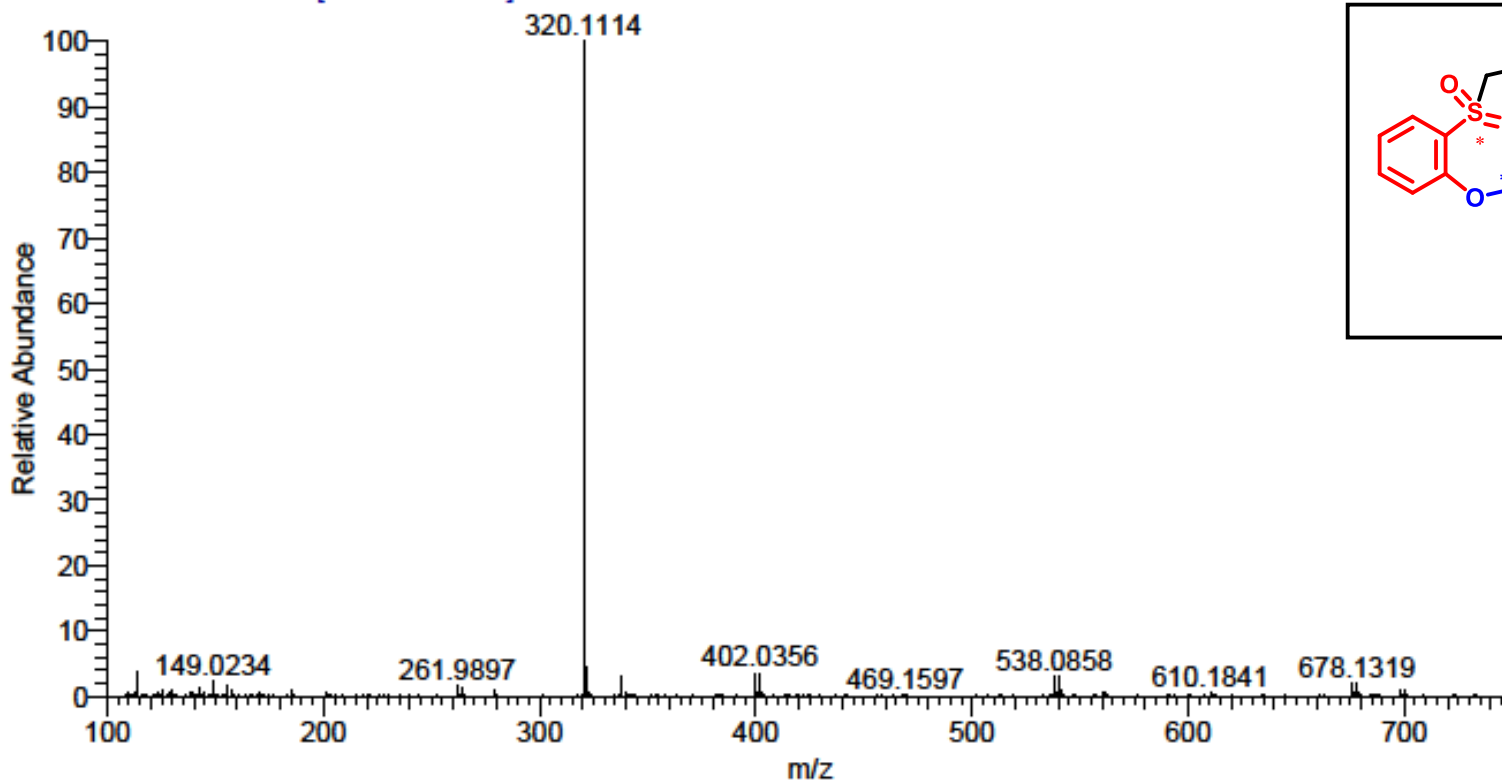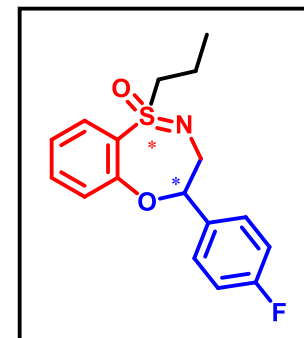

Fig S-92: HRMS report of Compound 4I'

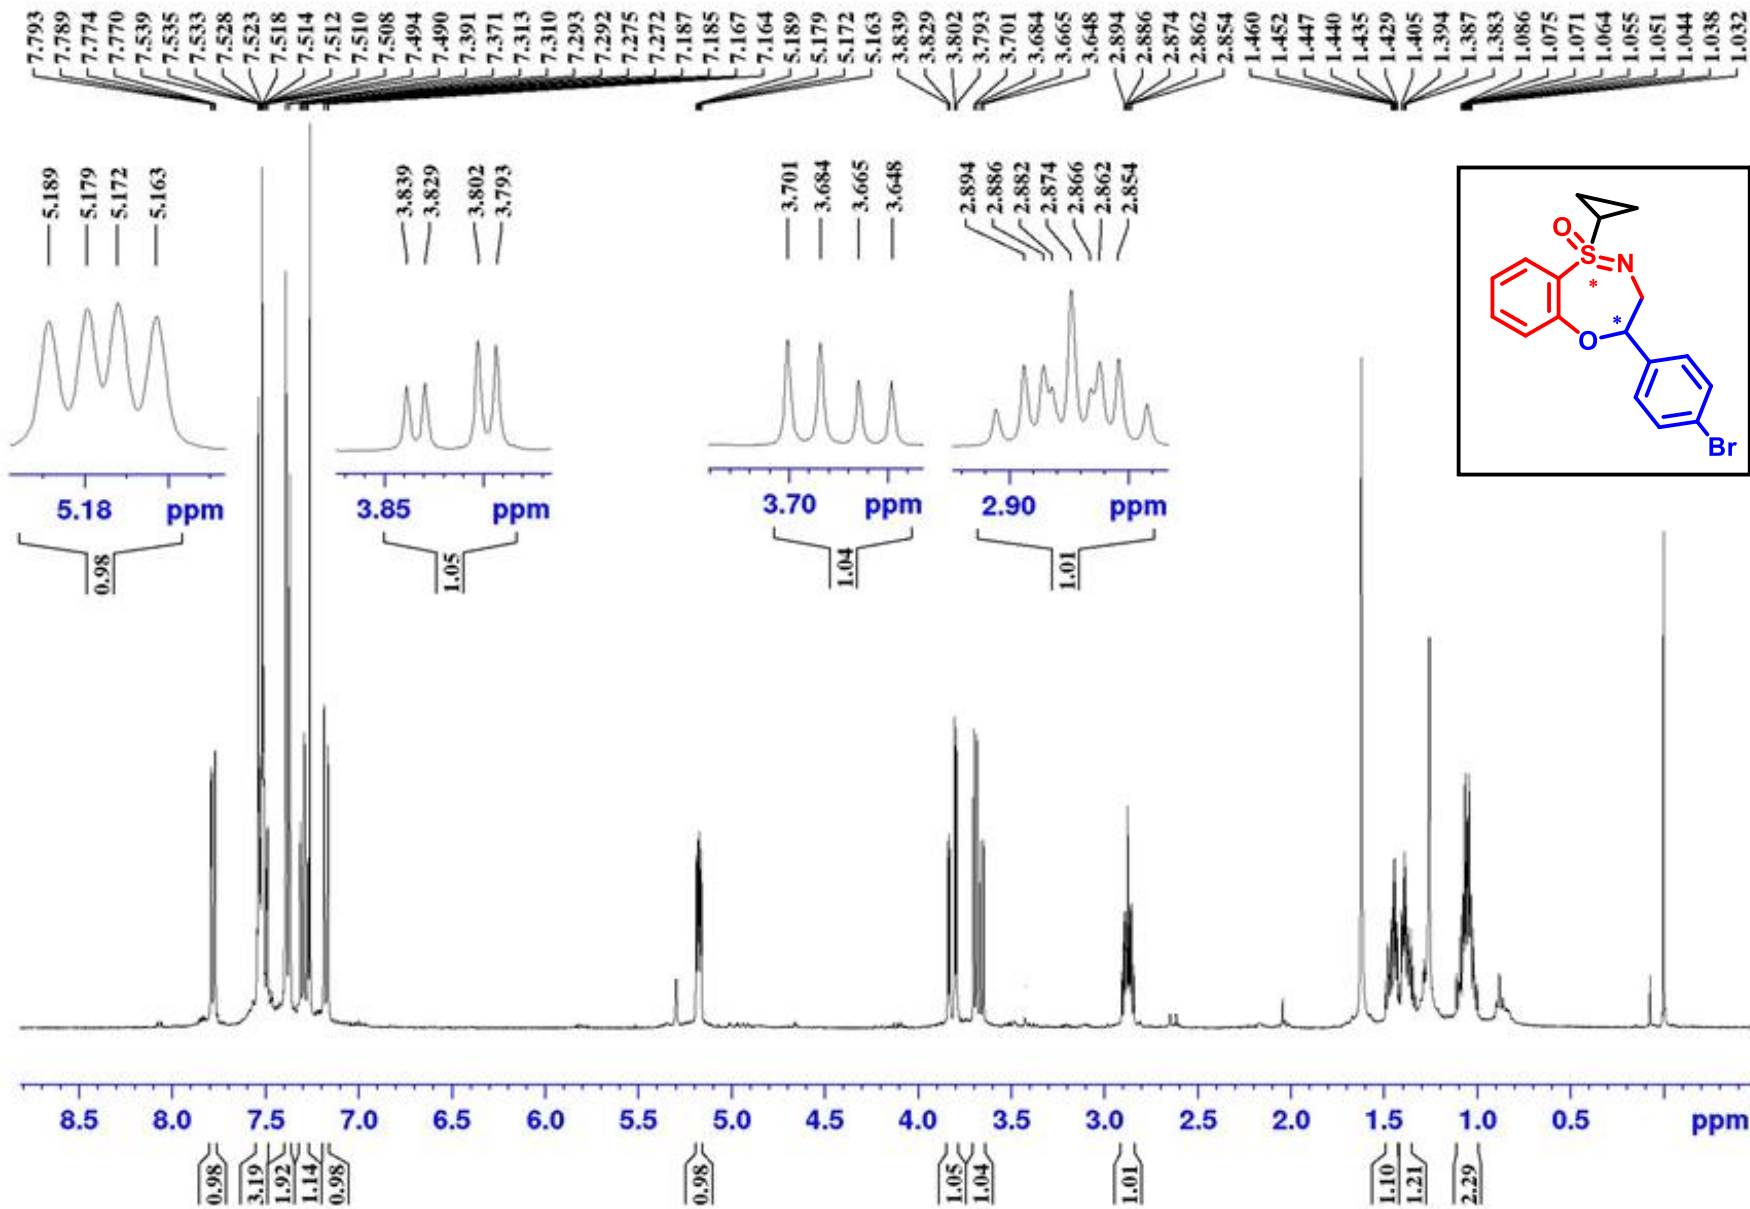

**Fig S-93:**  $^1\text{H}$  NMR Spectra of Compound **4m** (400 MHz,  $\text{CDCl}_3$ )

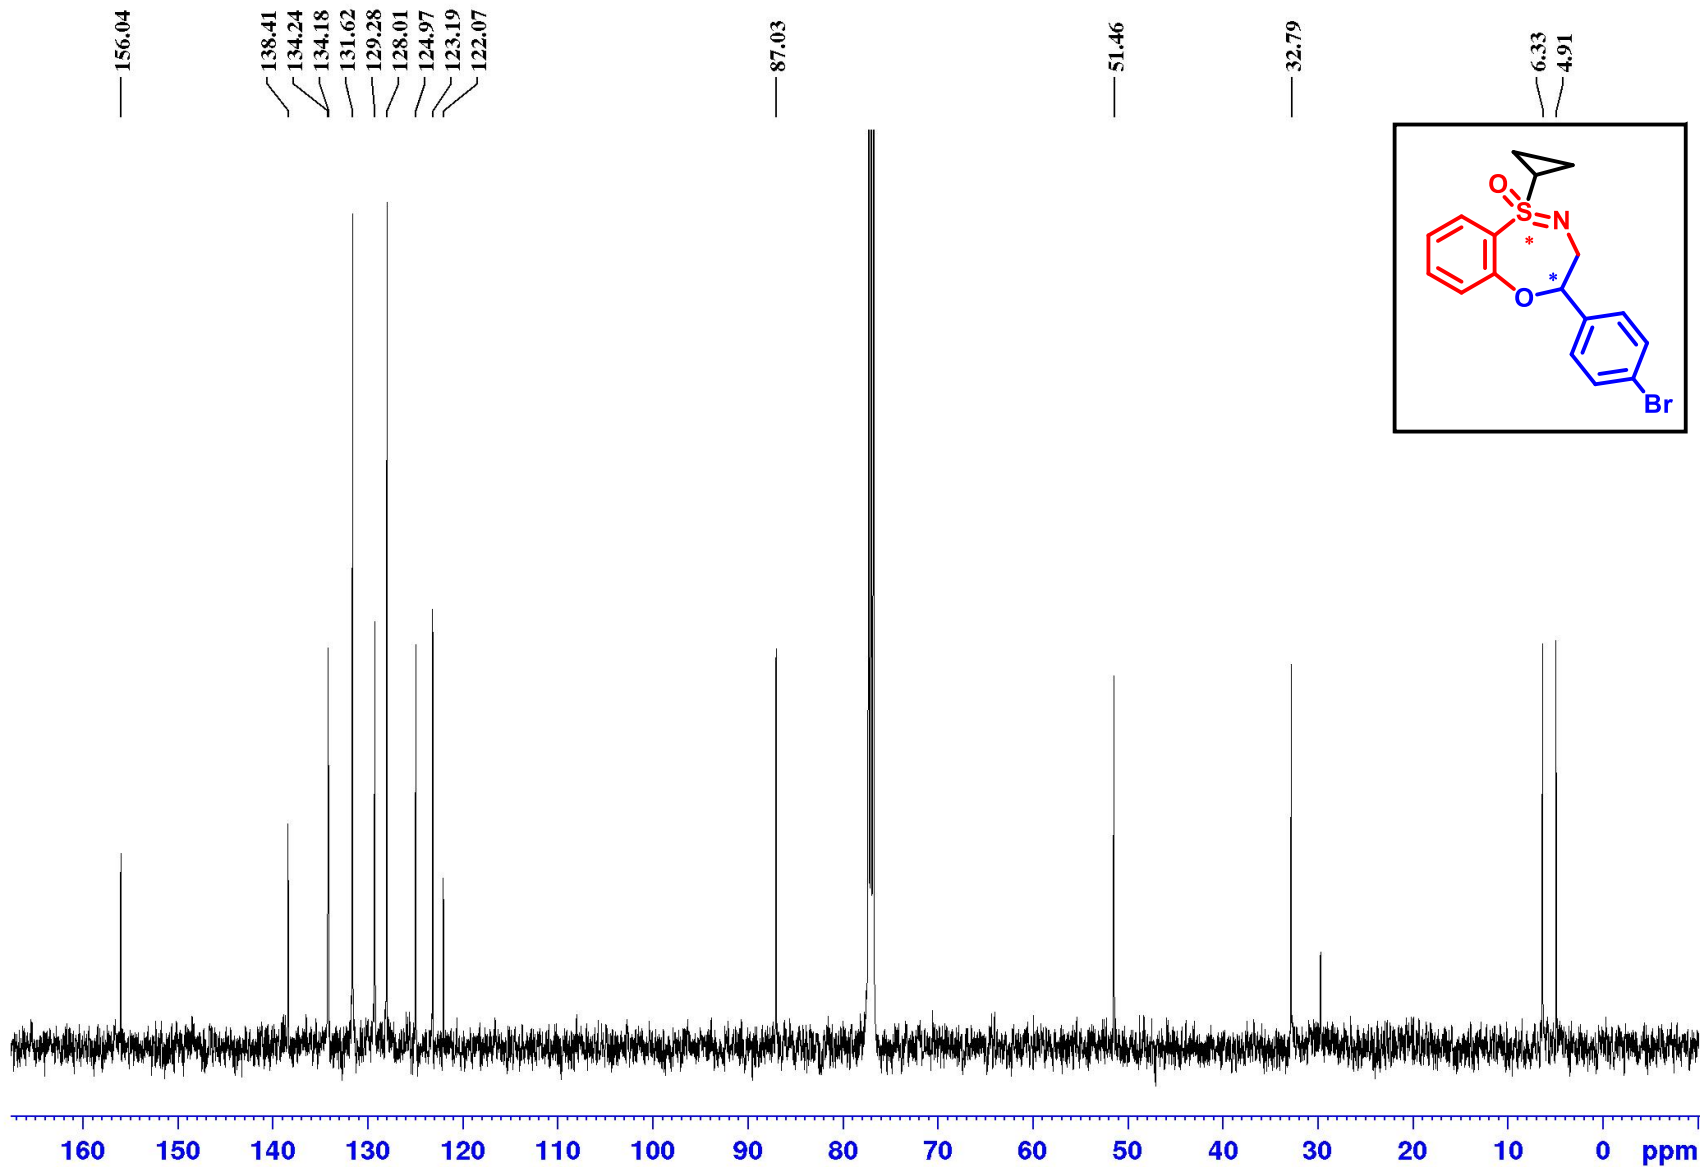

**Fig S-94:**  $^{13}\text{C}$  NMR Spectra of Compound 4m (100 MHz,  $\text{CDCl}_3$ )

HRMS21105APR02 #35 RT: 0.25 AV: 1 SB: 8 0.02-0.08 NL: 3.50E7

T: FTMS + c ESI Full ms [100.00-750.00]

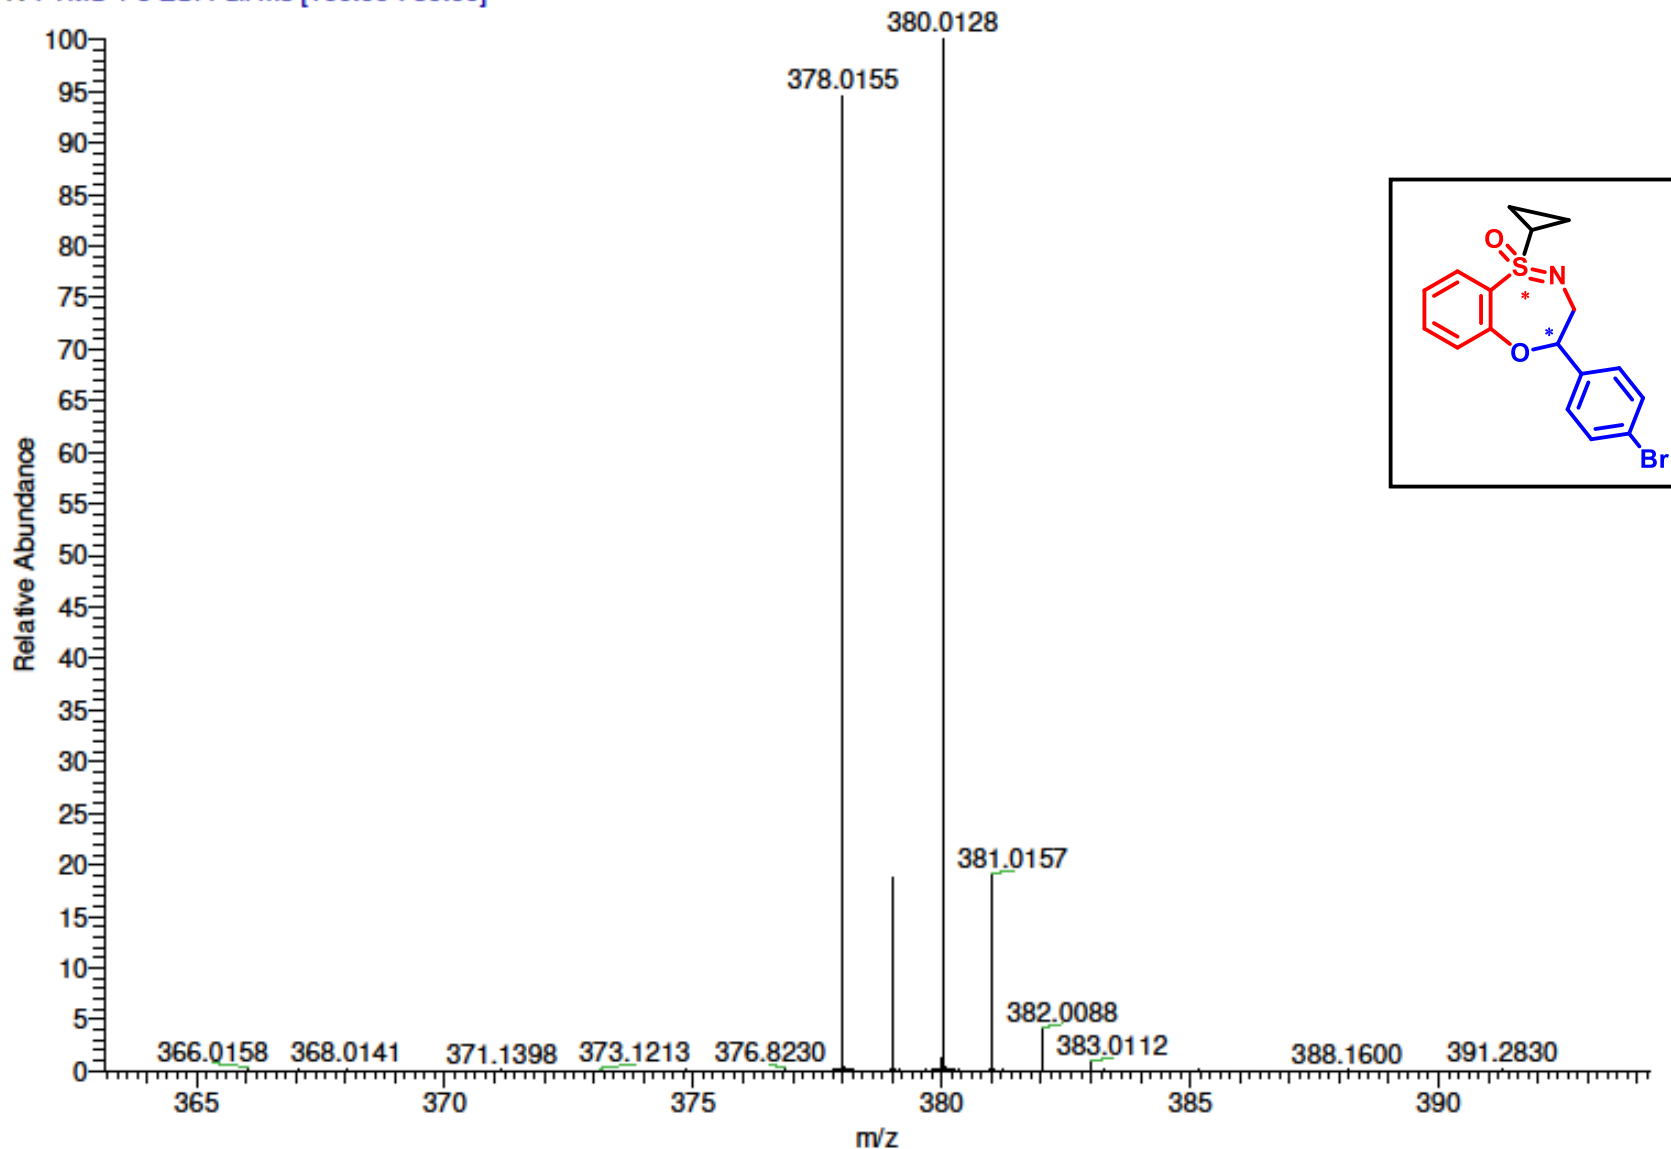

Fig S-95: HRMS report of Compound 4m

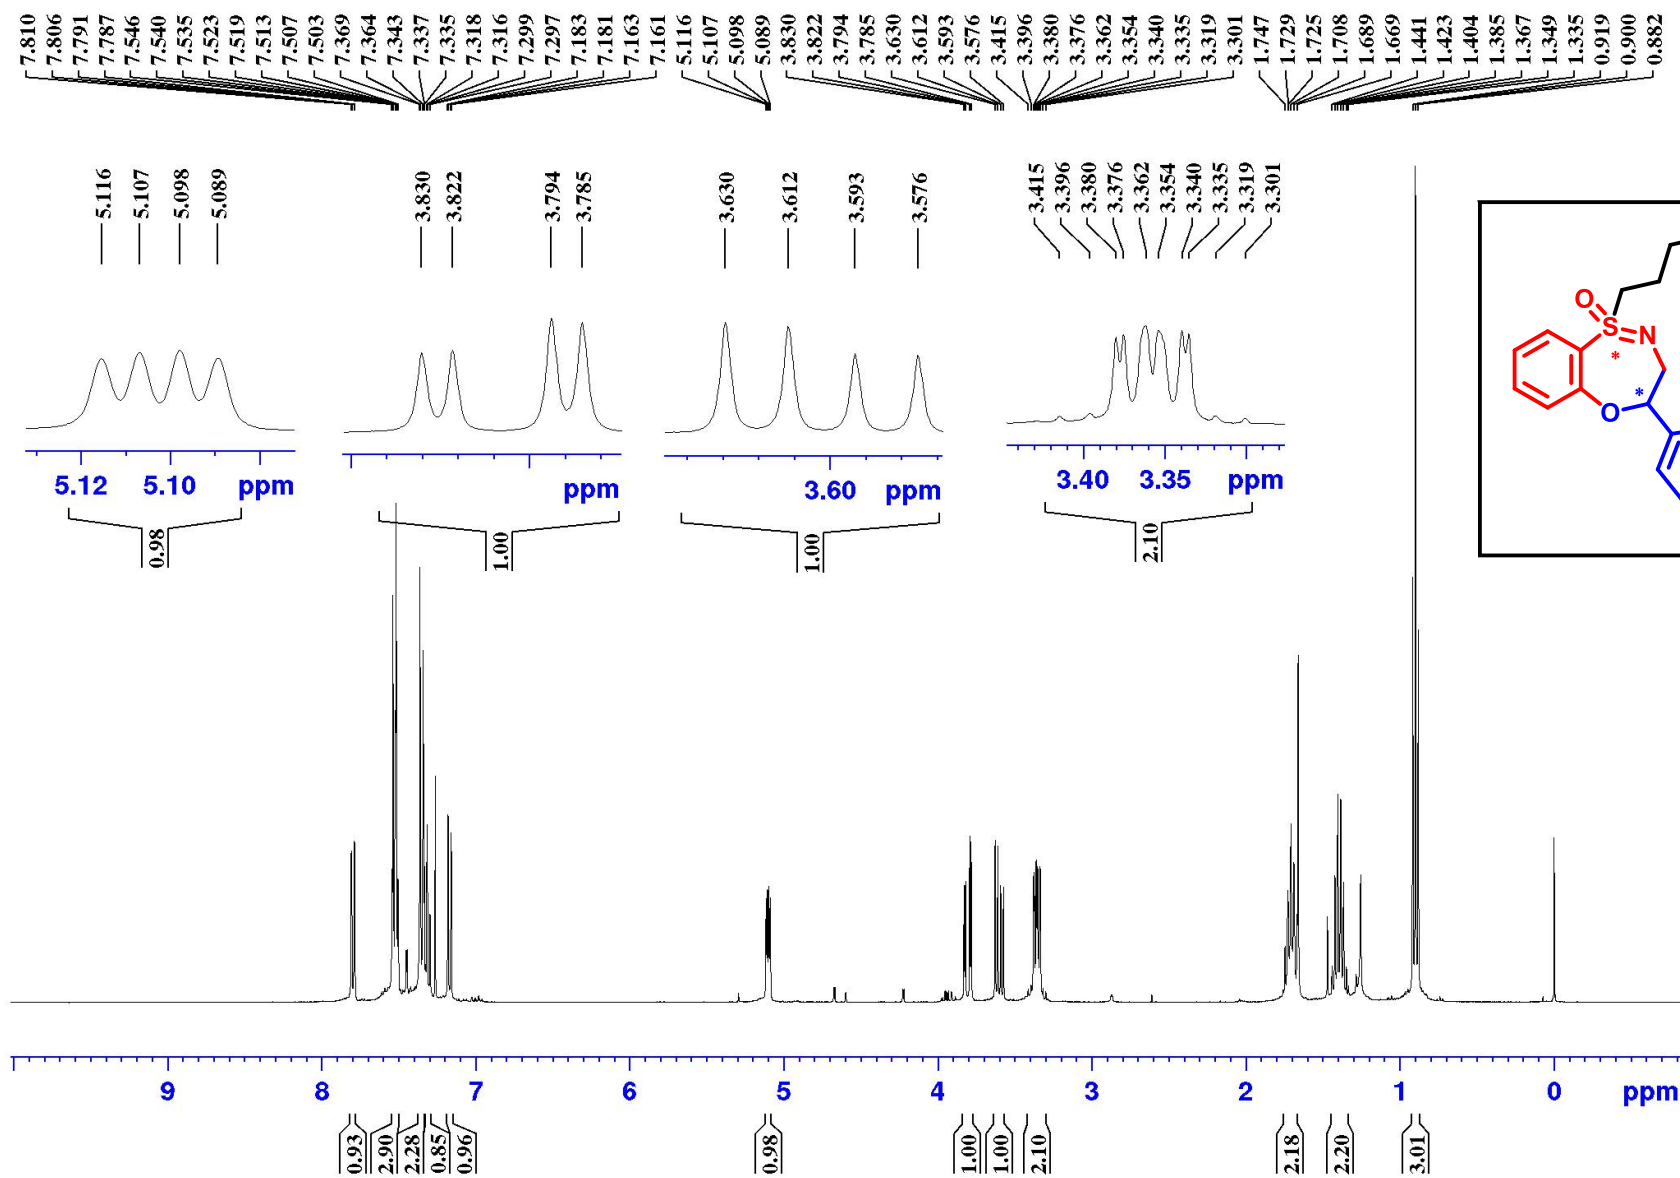

**Fig S-96:**  $^1\text{H}$  NMR Spectra of Compound 4n (400 MHz,  $\text{CDCl}_3$ )

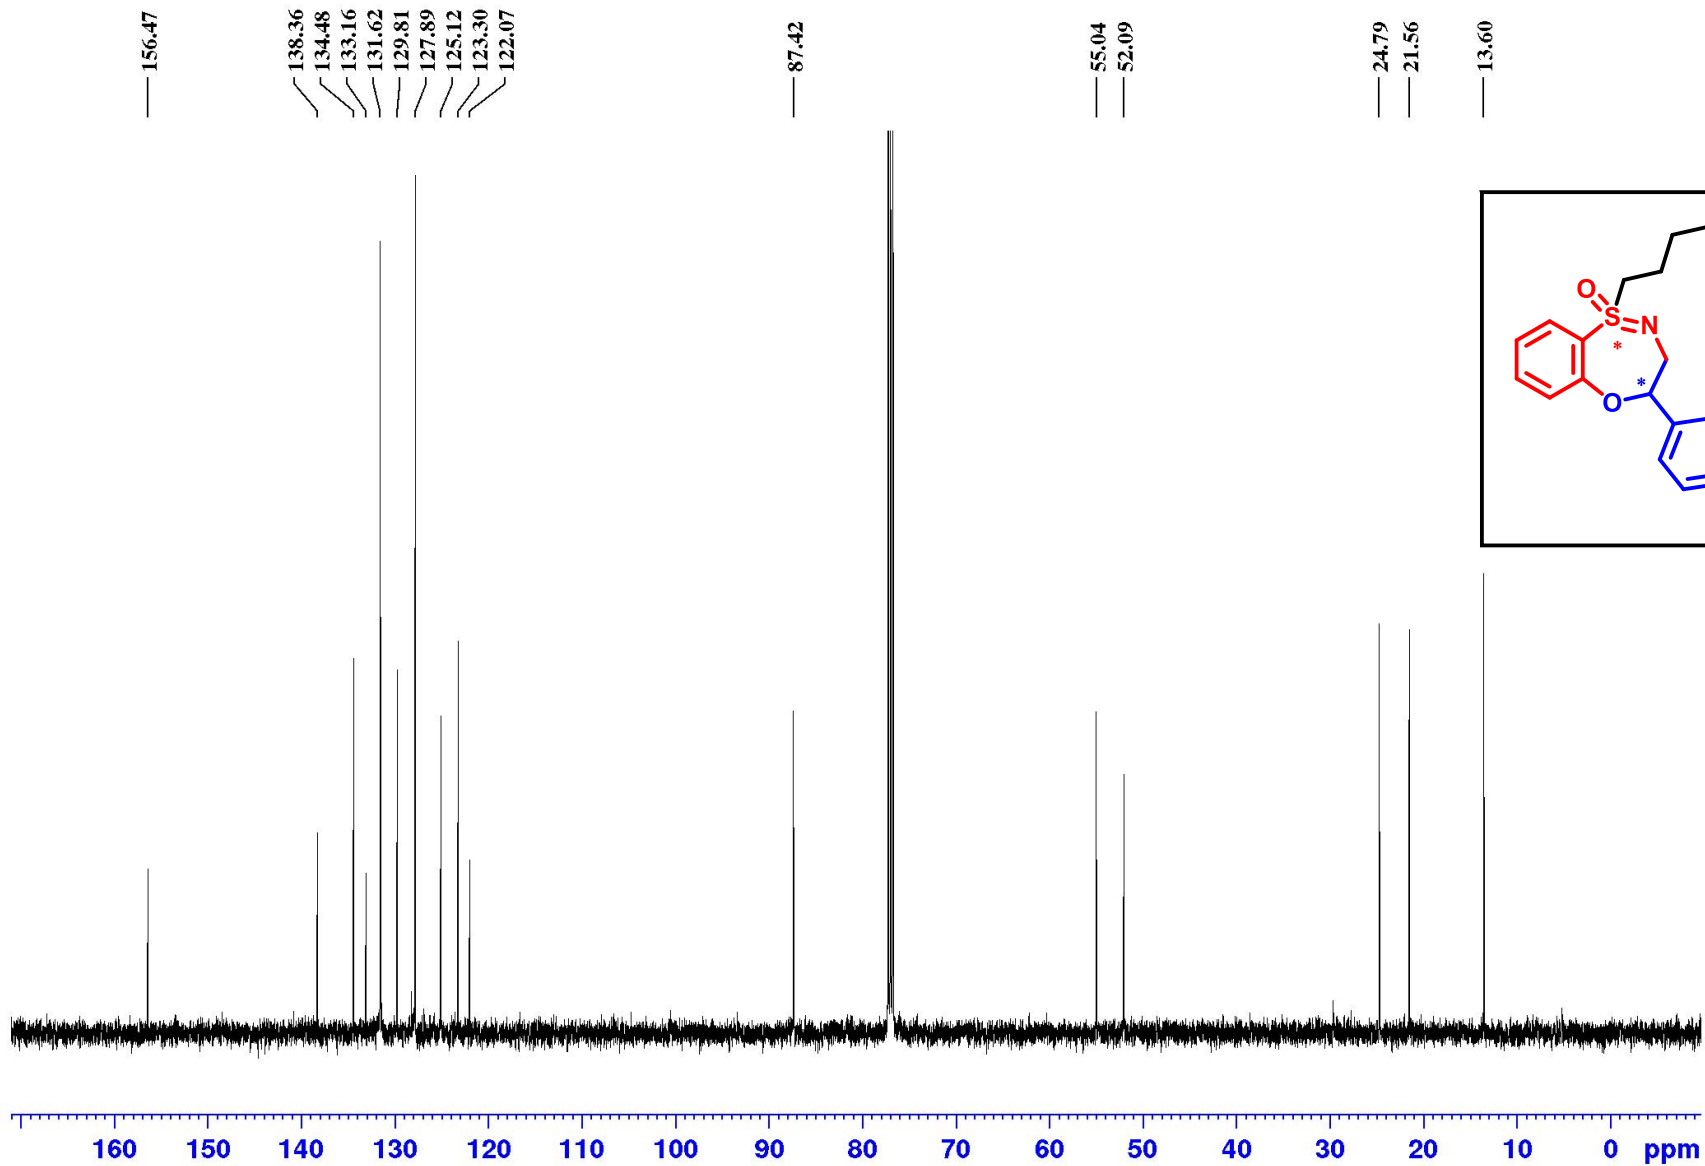

**Fig S-97:**  $^{13}\text{C}$  NMR Spectra of Compound **4n** (125 MHz,  $\text{CDCl}_3$ )

HRMS21131MAR03 #38 RT: 0.29 AV: 1 SB: 8 0.02-0.08 NL: 7.59E6  
T: FTMS + c ESI Full ms [100.00-750.00]

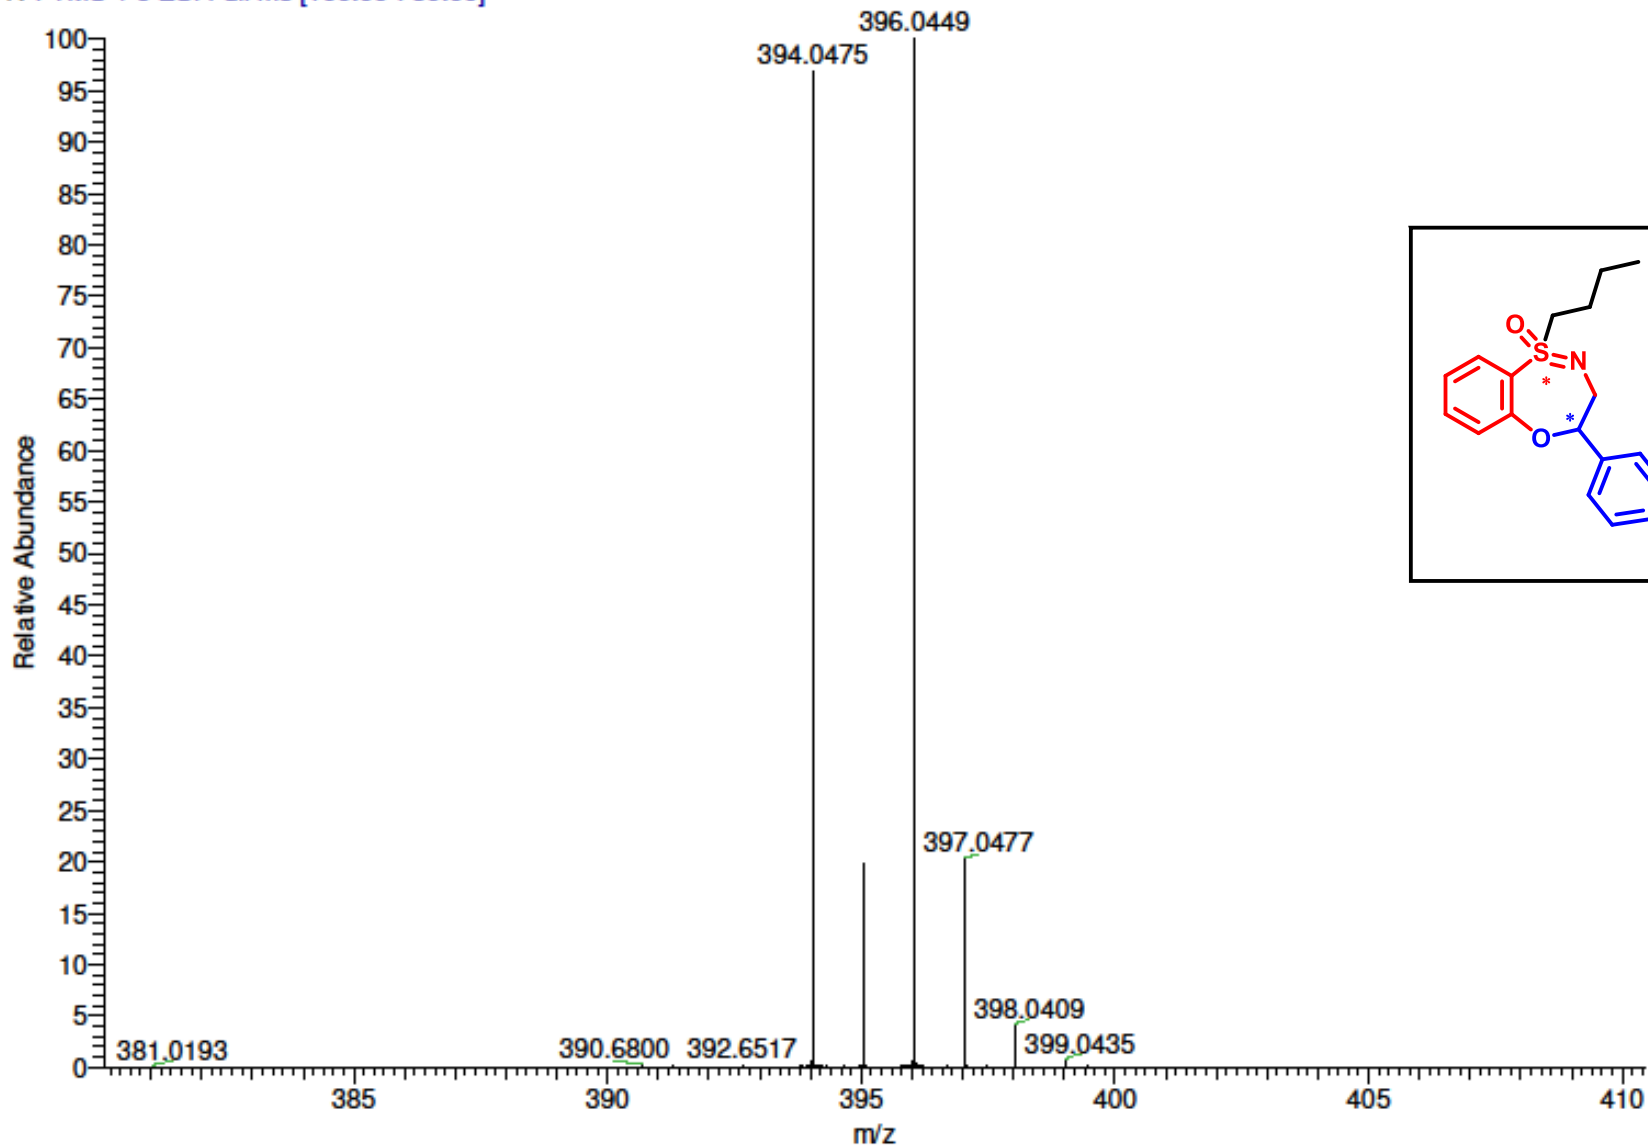

Fig S-98: HRMS report of Compound 4n

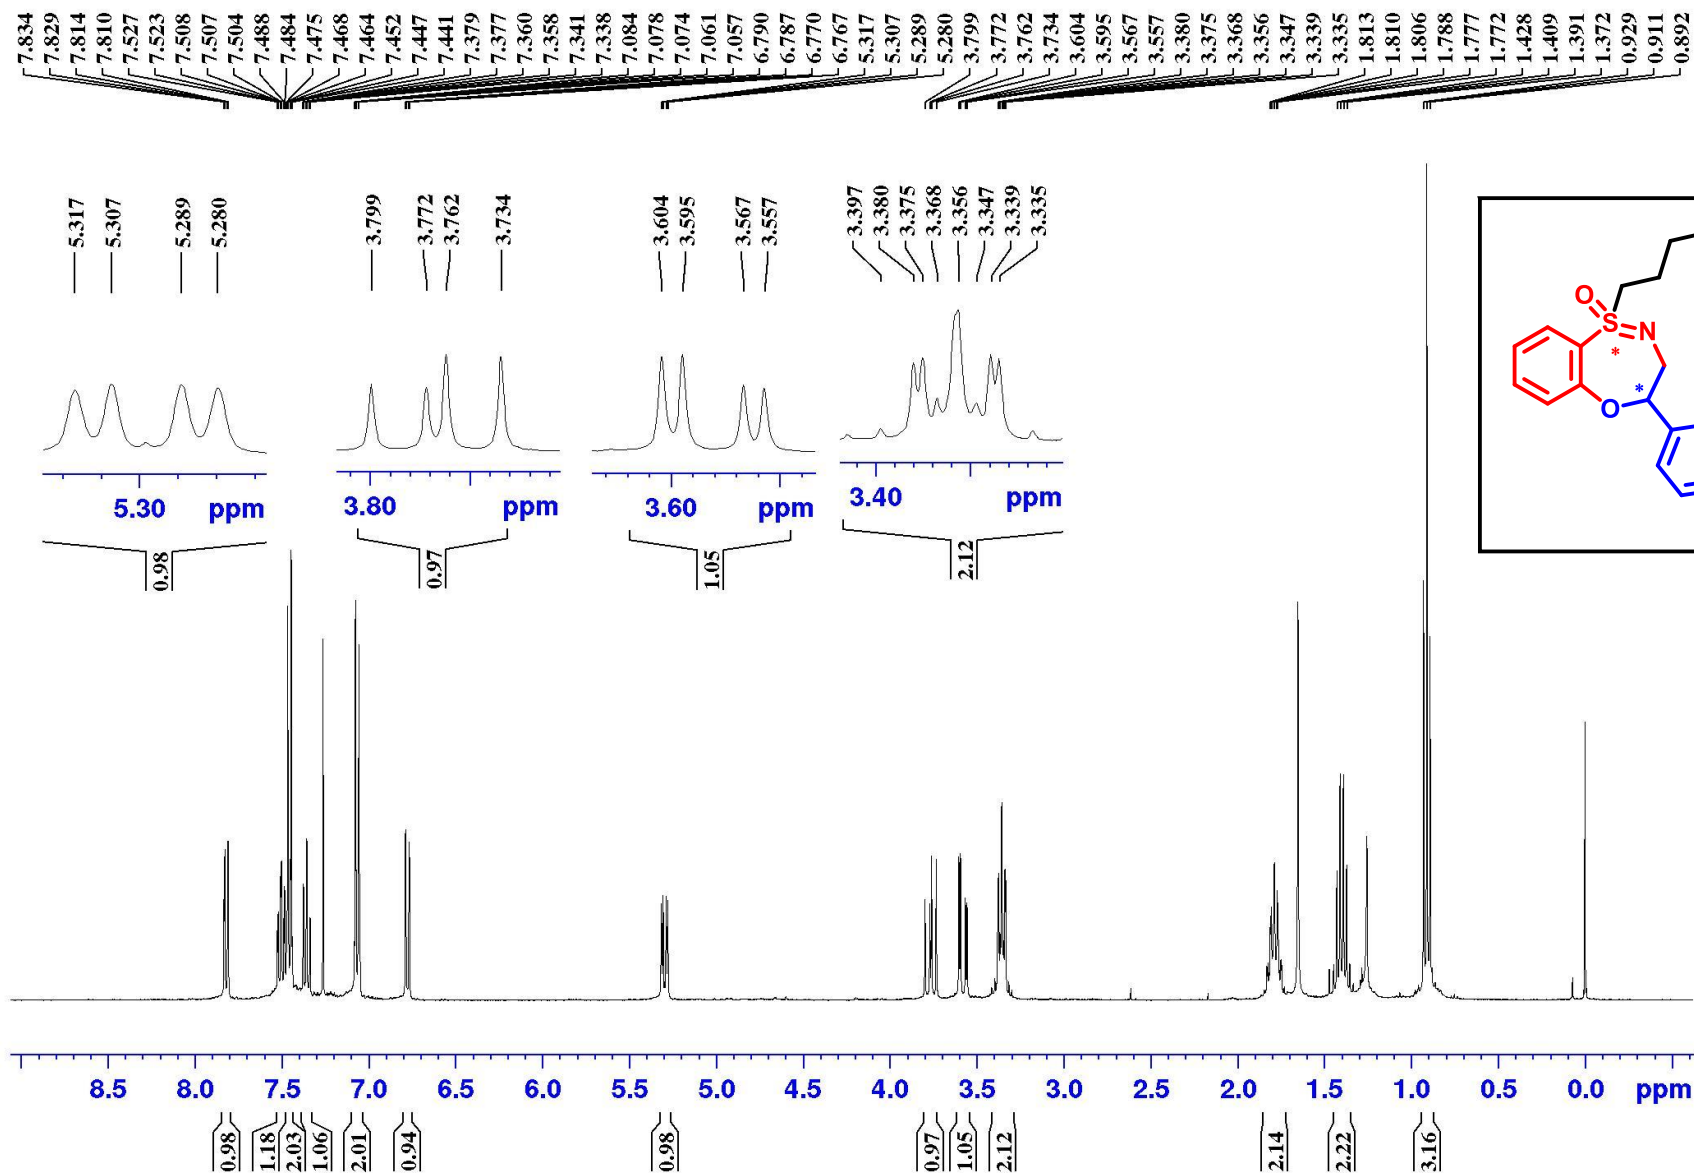

**Fig S-99:** <sup>1</sup>H NMR Spectra of Compound 4n' (400 MHz, CDCl<sub>3</sub>)



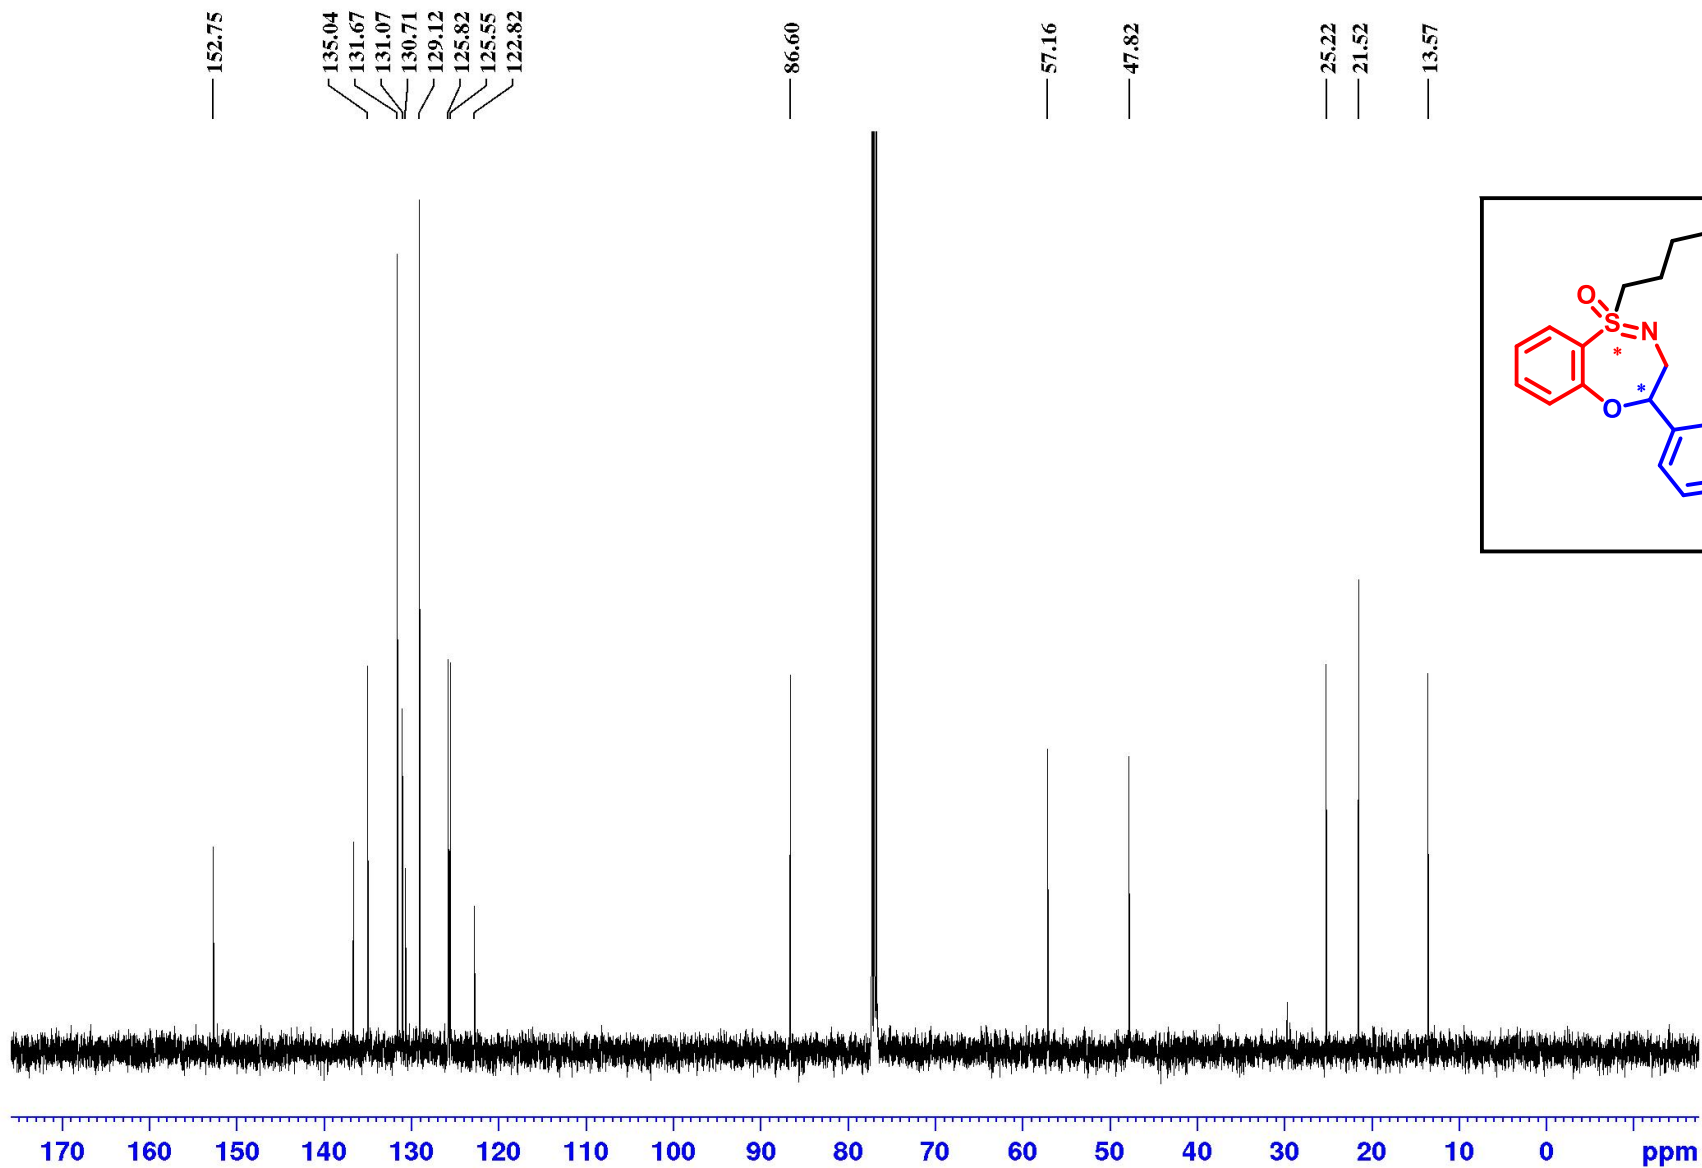

**Fig S-100:**  $^{13}\text{C}$  NMR Spectra of Compound **4n'** (125 MHz,  $\text{CDCl}_3$ )

## SAIF [HRMS Report]

|                   |                      |                       |                                  |
|-------------------|----------------------|-----------------------|----------------------------------|
| Data File:        | HRMS21I31MAR04       | Original Data Path:   | D:\INTERNAL NEW\2021\Mar<br>2021 |
| Sample ID:        | AB-173B              | Sample Name:          |                                  |
| Acquisition Date: | 03/31/21 11:37:53 AM | Run Time(min):        | 0.00                             |
| Vial:             | CStk1-01:4           | Injection Volume(μl): | 1.00                             |

HRMS21I31MAR04 #33-66 RT: 0.25-0.50 AV: 34 SB: 1 0.01 NL: 5.43E6  
T: FTMS + c ESI Full ms [100.00-750.00]

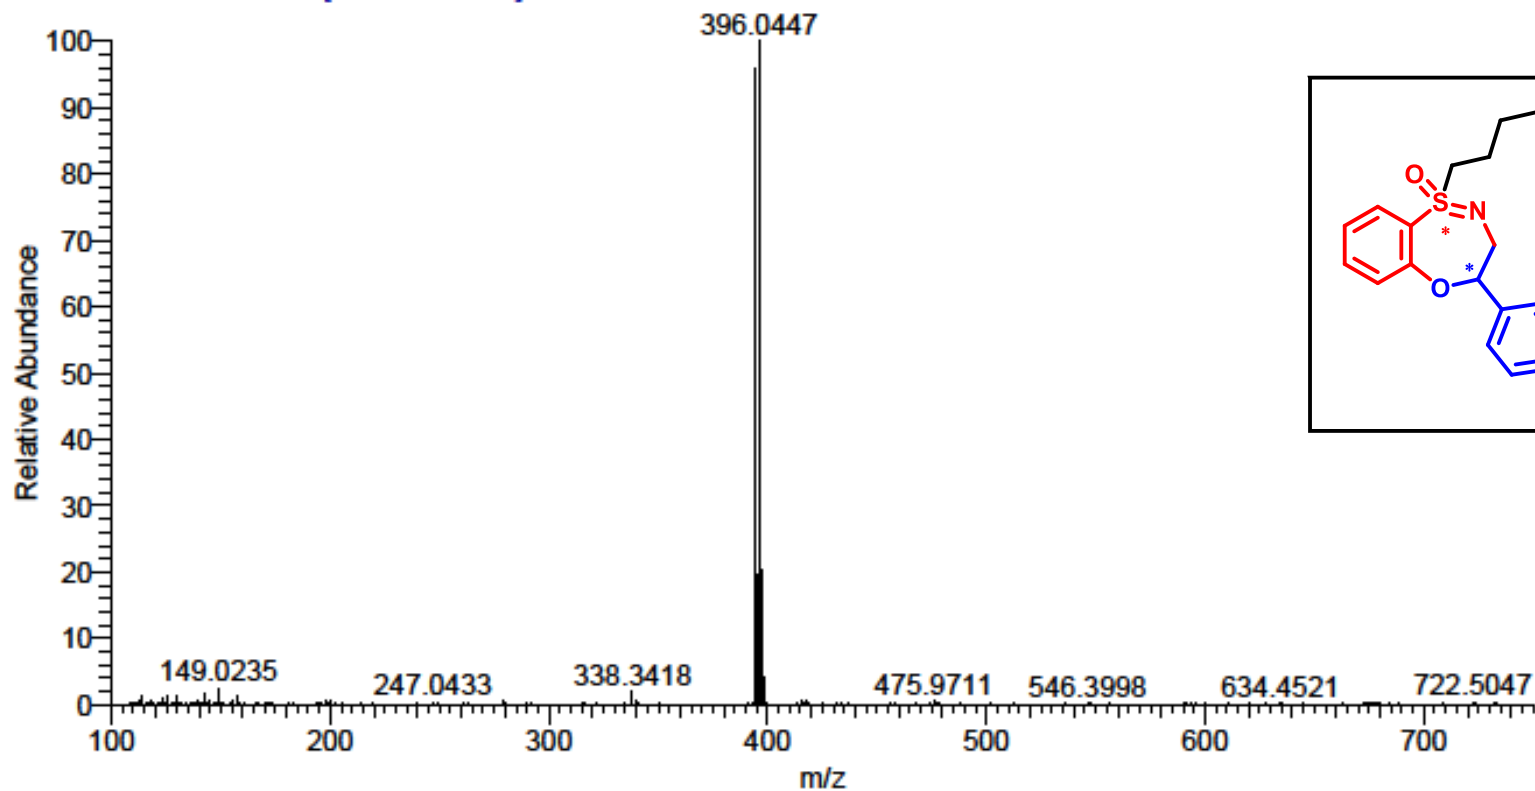

Fig S-101: HRMS report of Compound 4n'

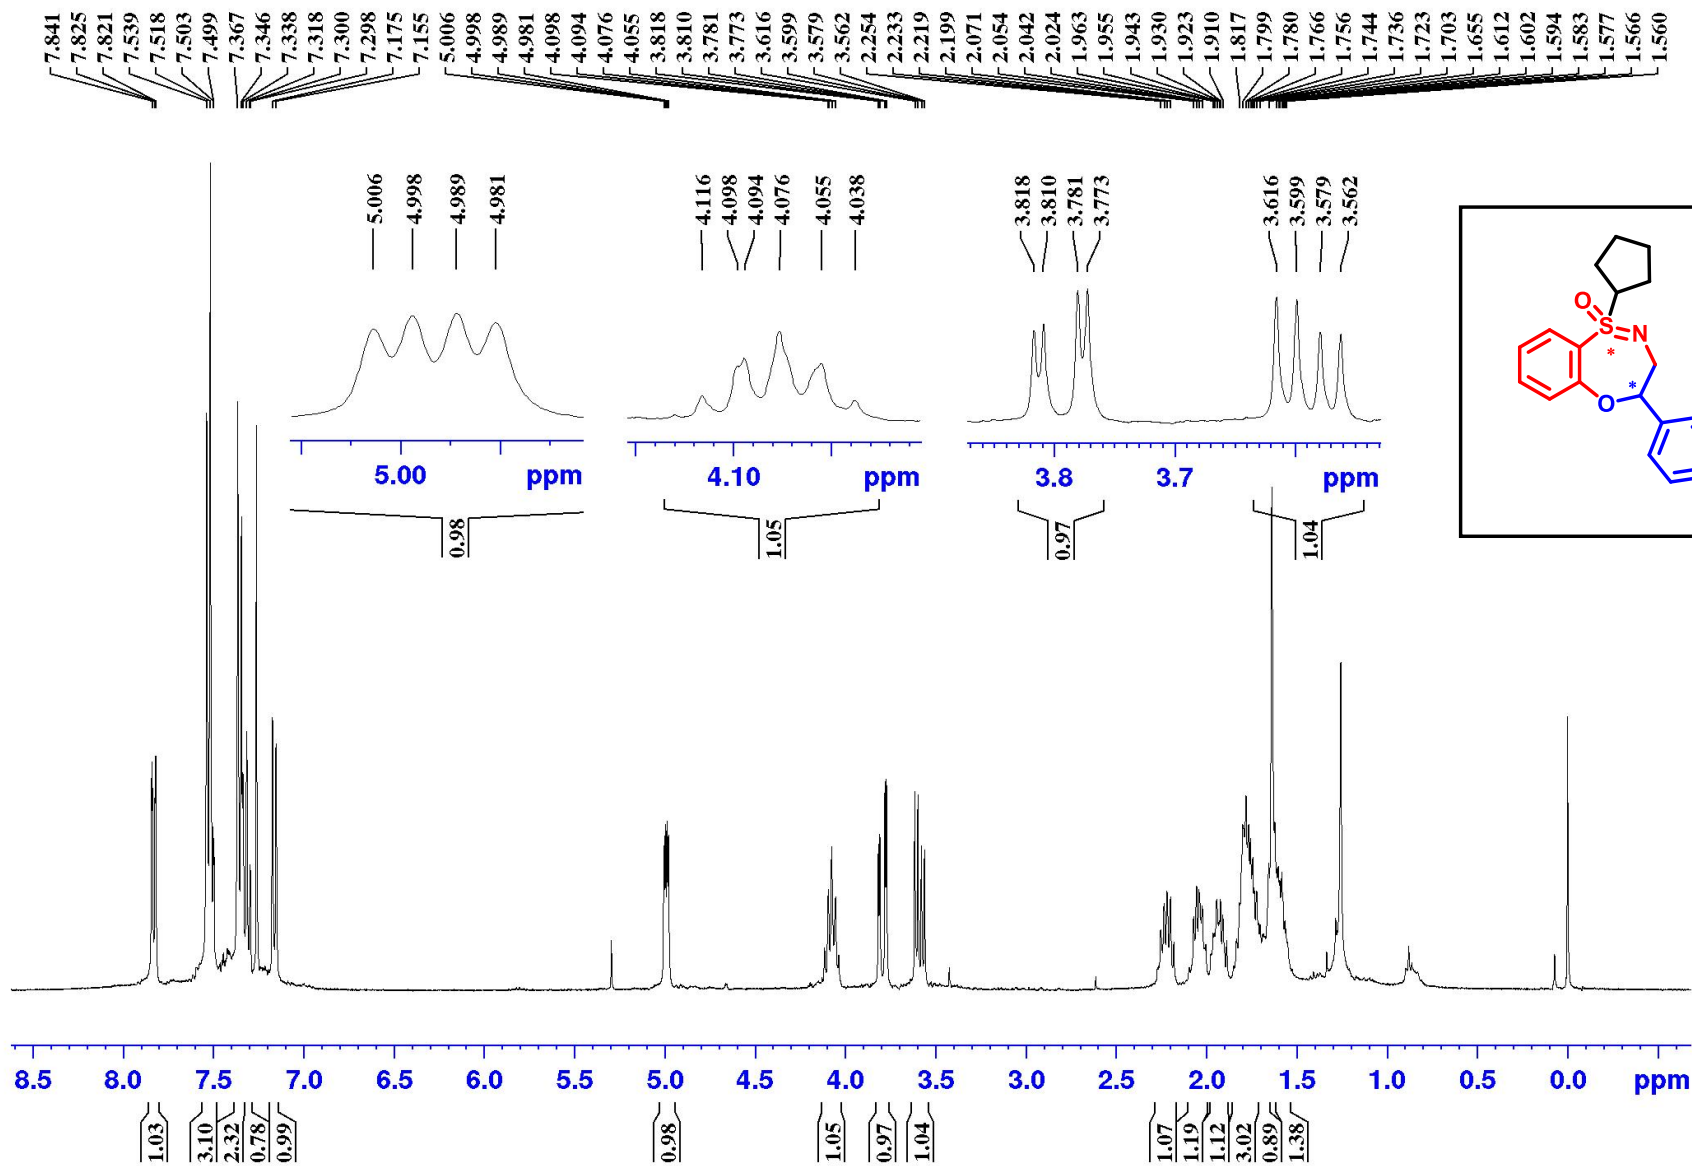

Fig S-102:  $^1\text{H}$  NMR Spectra of Compound **4o** (400 MHz,  $\text{CDCl}_3$ )

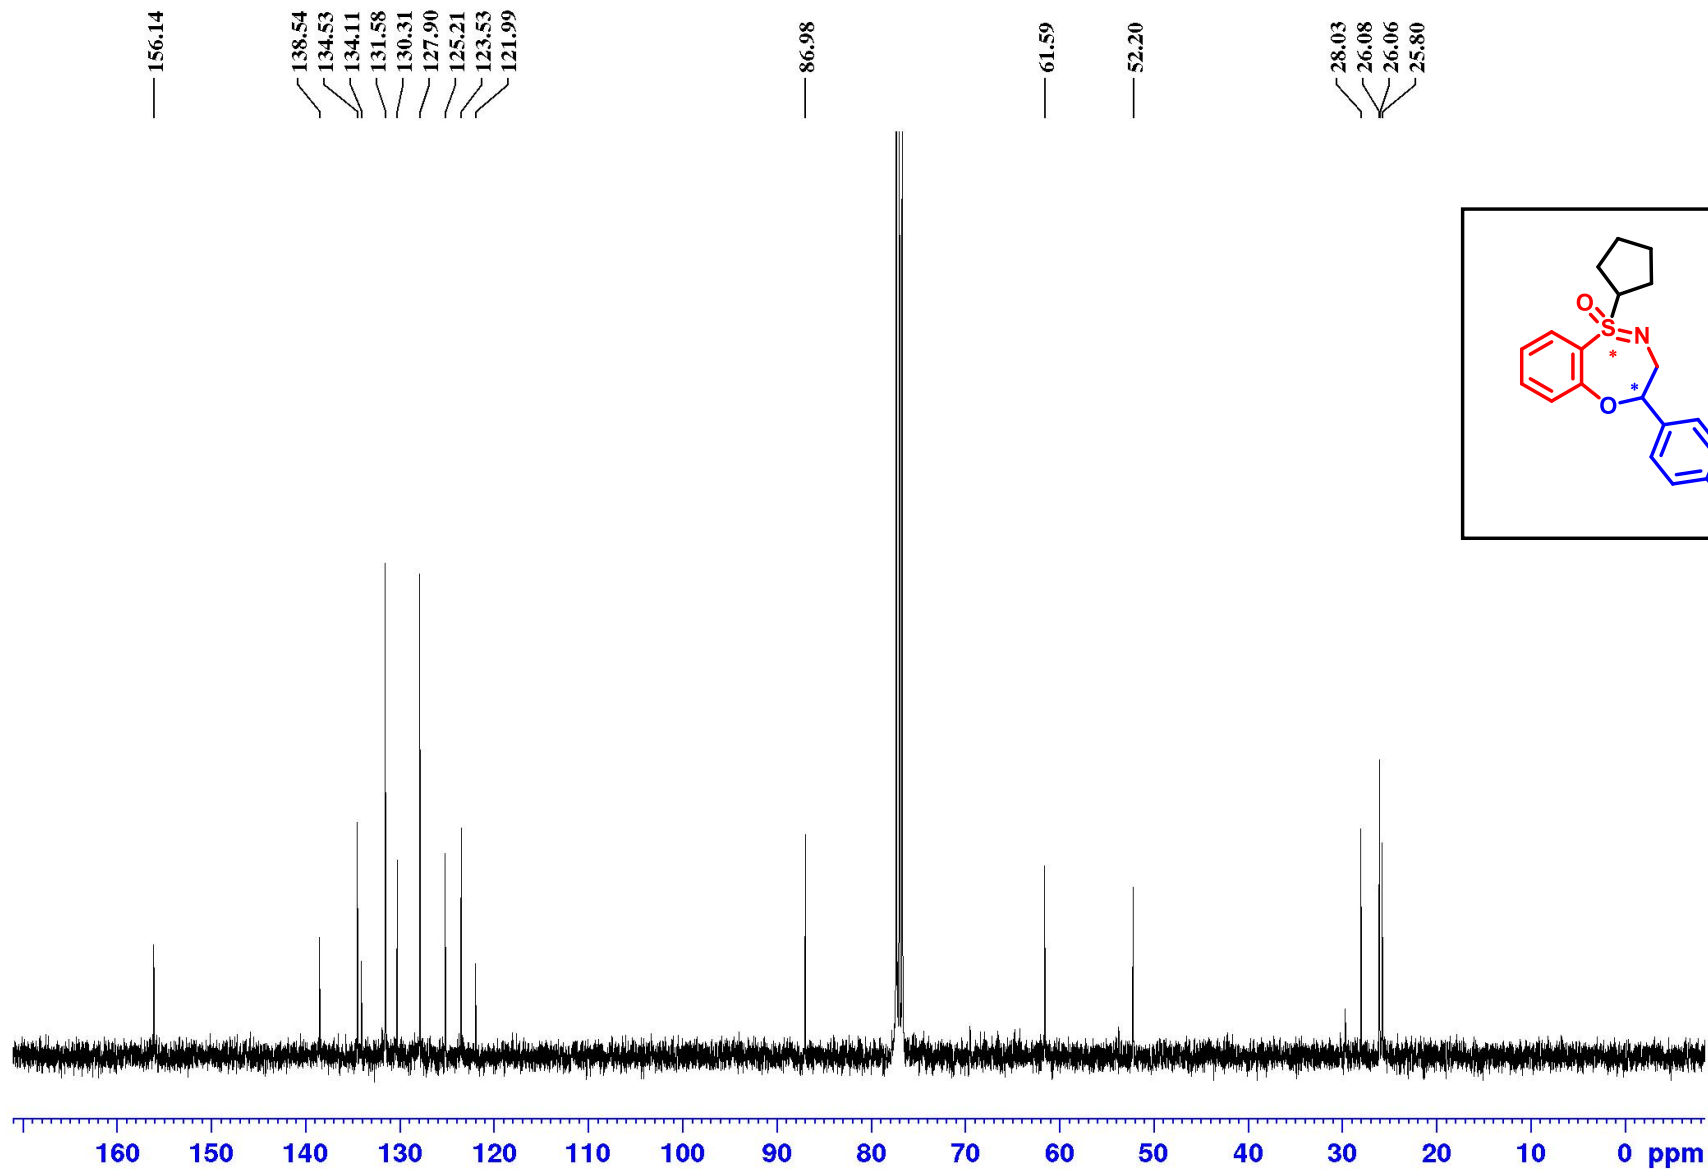

**Fig S-103:**  $^{13}\text{C}$  NMR Spectra of Compound **4o** (100 MHz,  $\text{CDCl}_3$ )

HRMS21105APR03 #30-45 RT: 0.22-0.33 AV: 16 SB: 8 0.02-0.08 NL: 2.73E6  
T: FTMS + c ESI Full ms [100.00-750.00]

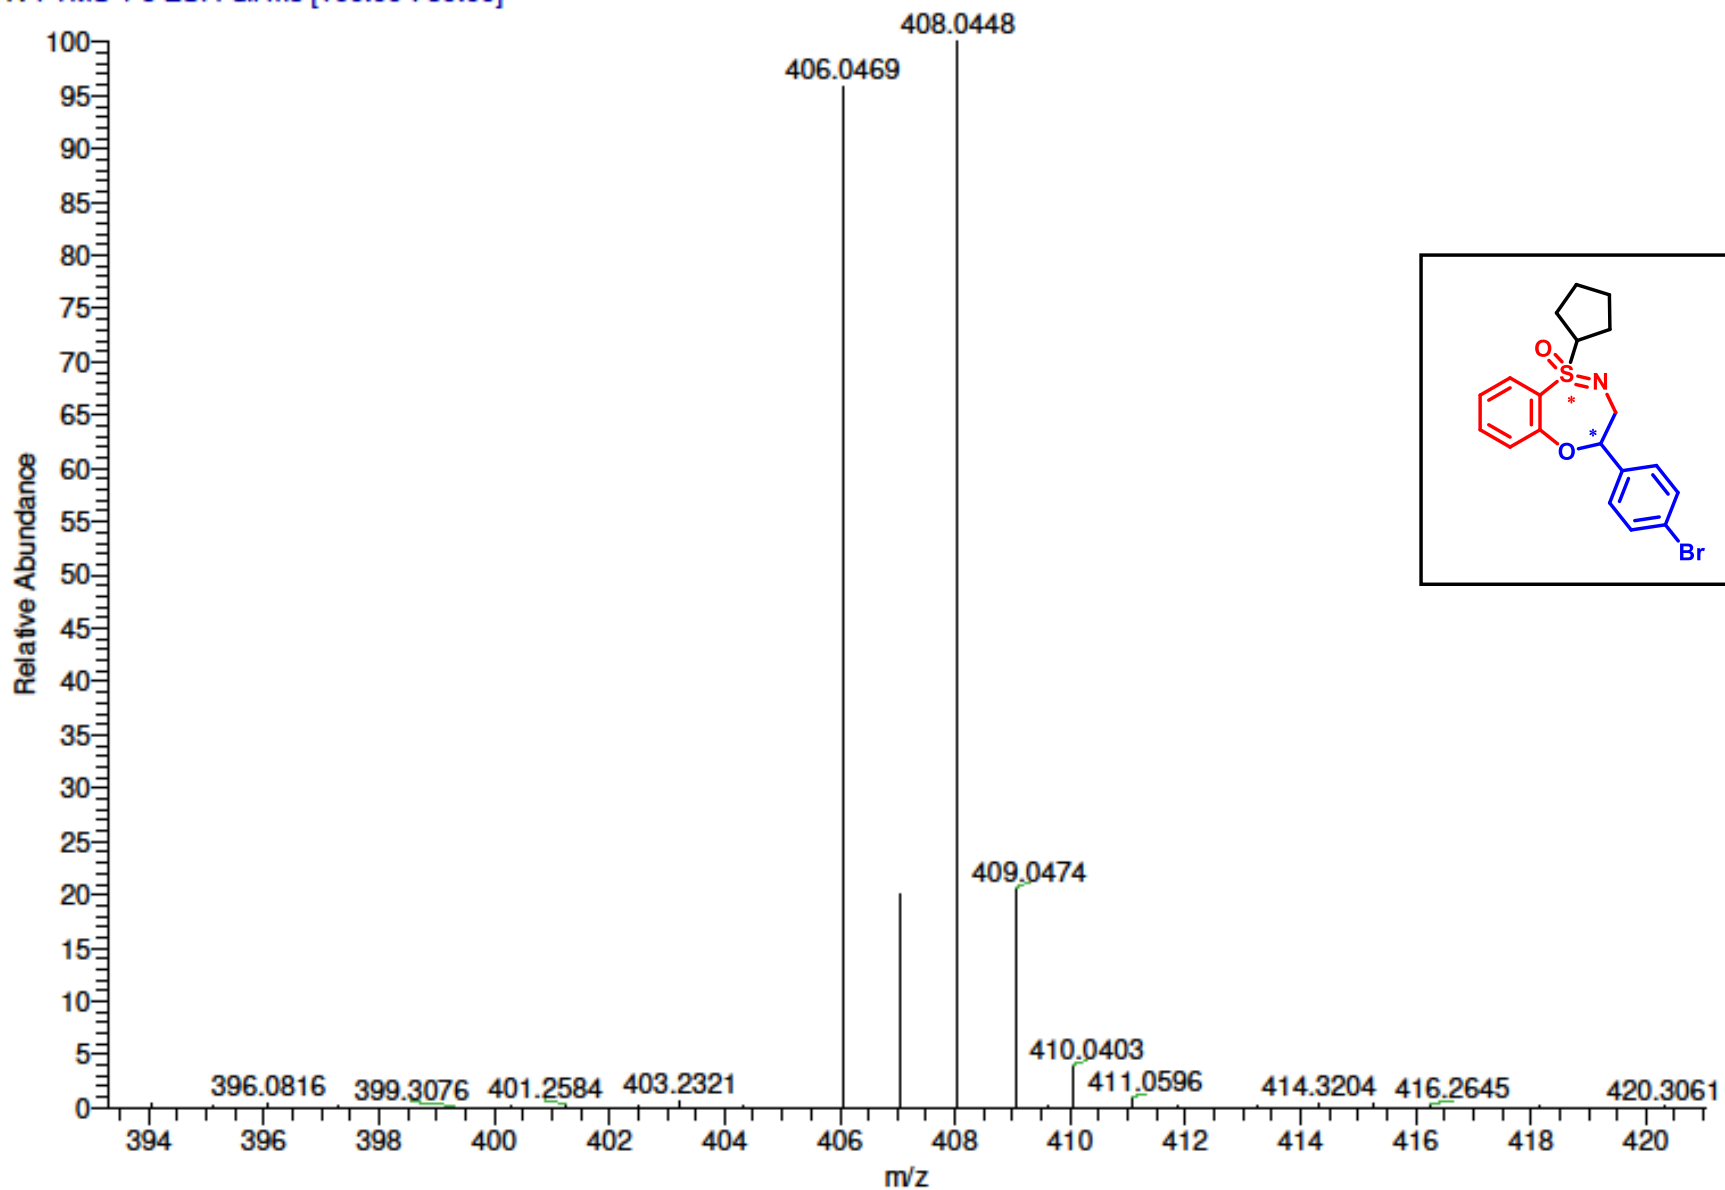

Fig S-104: HRMS report of Compound 4o

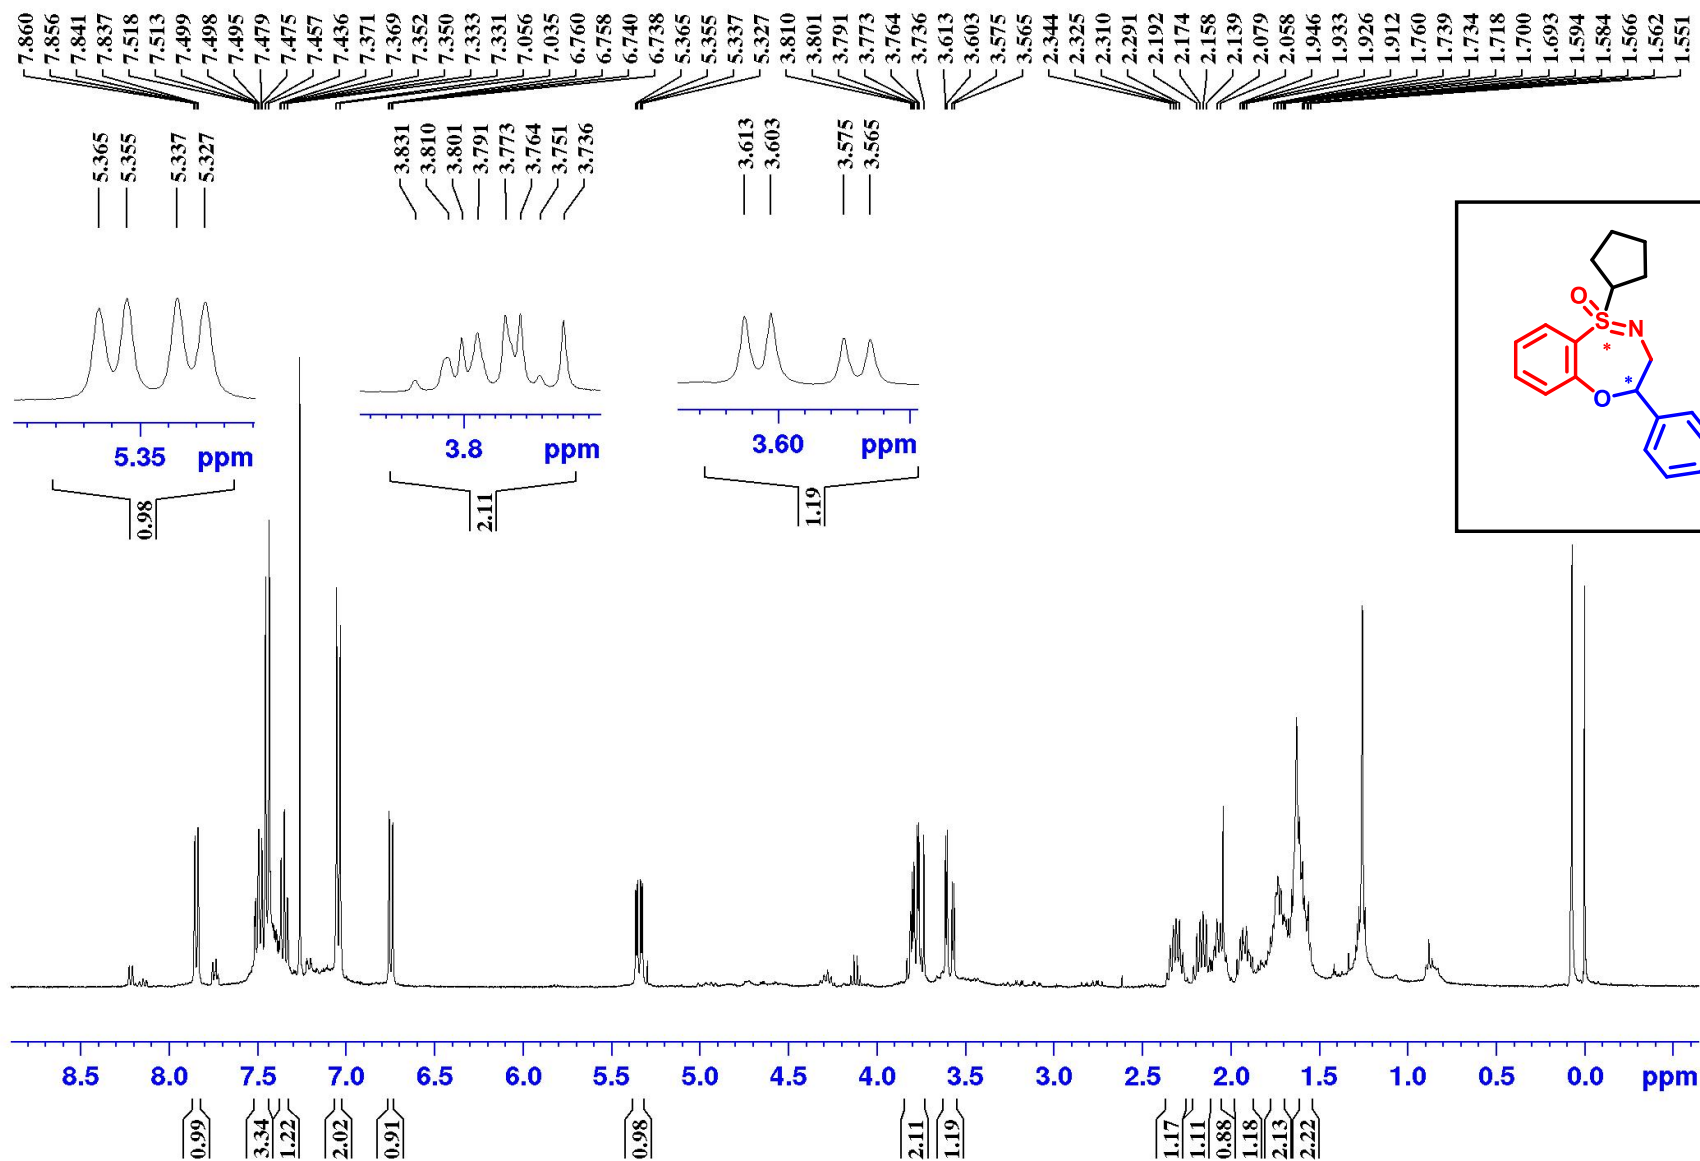

**Fig S-105:** <sup>1</sup>H NMR Spectra of Compound 4o' (400 MHz, CDCl<sub>3</sub>)

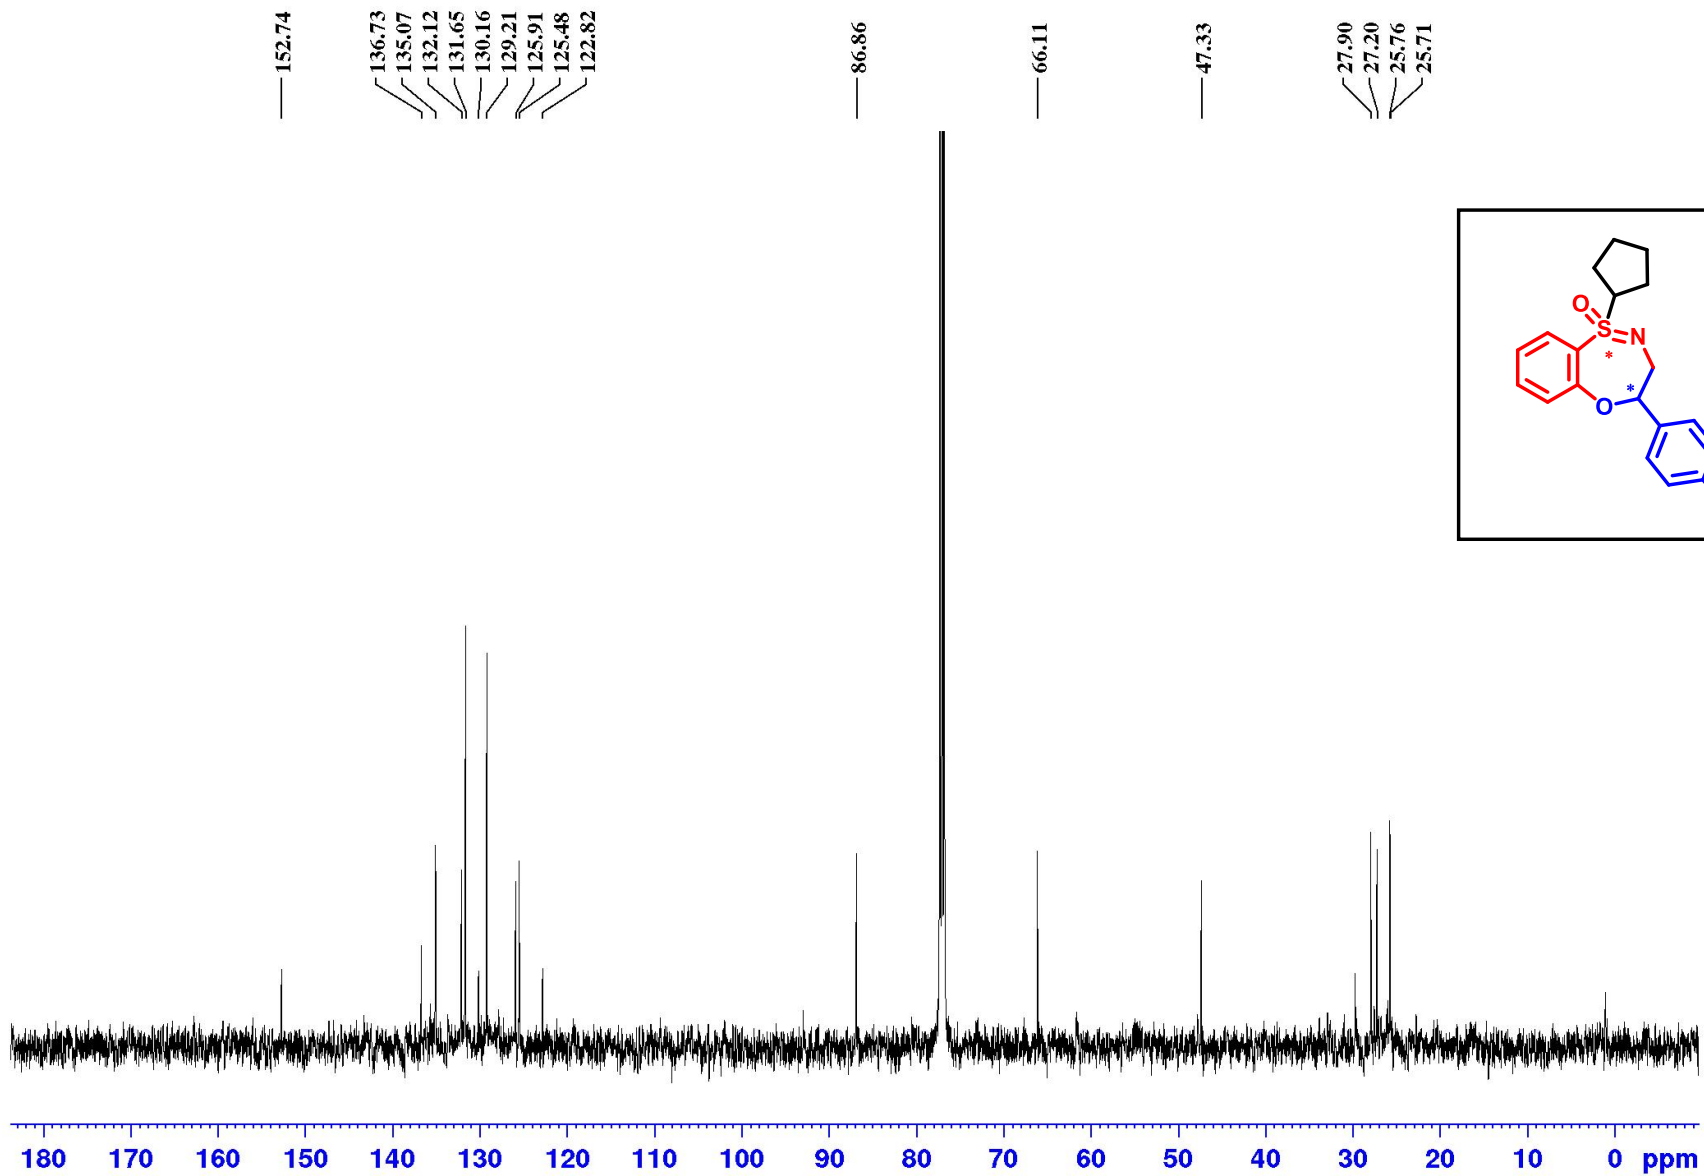

**Fig S-106:**  $^{13}\text{C}$  NMR Spectra of Compound **4o'** (100 MHz,  $\text{CDCl}_3$ )

## SAIF [HRMS Report]

|                   |                      |                       |                                    |
|-------------------|----------------------|-----------------------|------------------------------------|
| Data File:        | HRMS21I05APR04       | Original Data Path:   | D:\INTERNAL NEW\2021\April<br>2021 |
| Sample ID:        | AB-174B              | Sample Name:          |                                    |
| Acquisition Date: | 04/05/21 11:43:16 AM | Run Time(min):        | 0.00                               |
| Vial:             | CSfk1-01:4           | Injection Volume(μl): | 1.00                               |

HRMS21I05APR04 #34-67 RT: 0.25-0.50 AV: 34 SB: 1 0.01 NL: 3.37E6  
T: FTMS + c ESI Full ms [100.00-750.00]

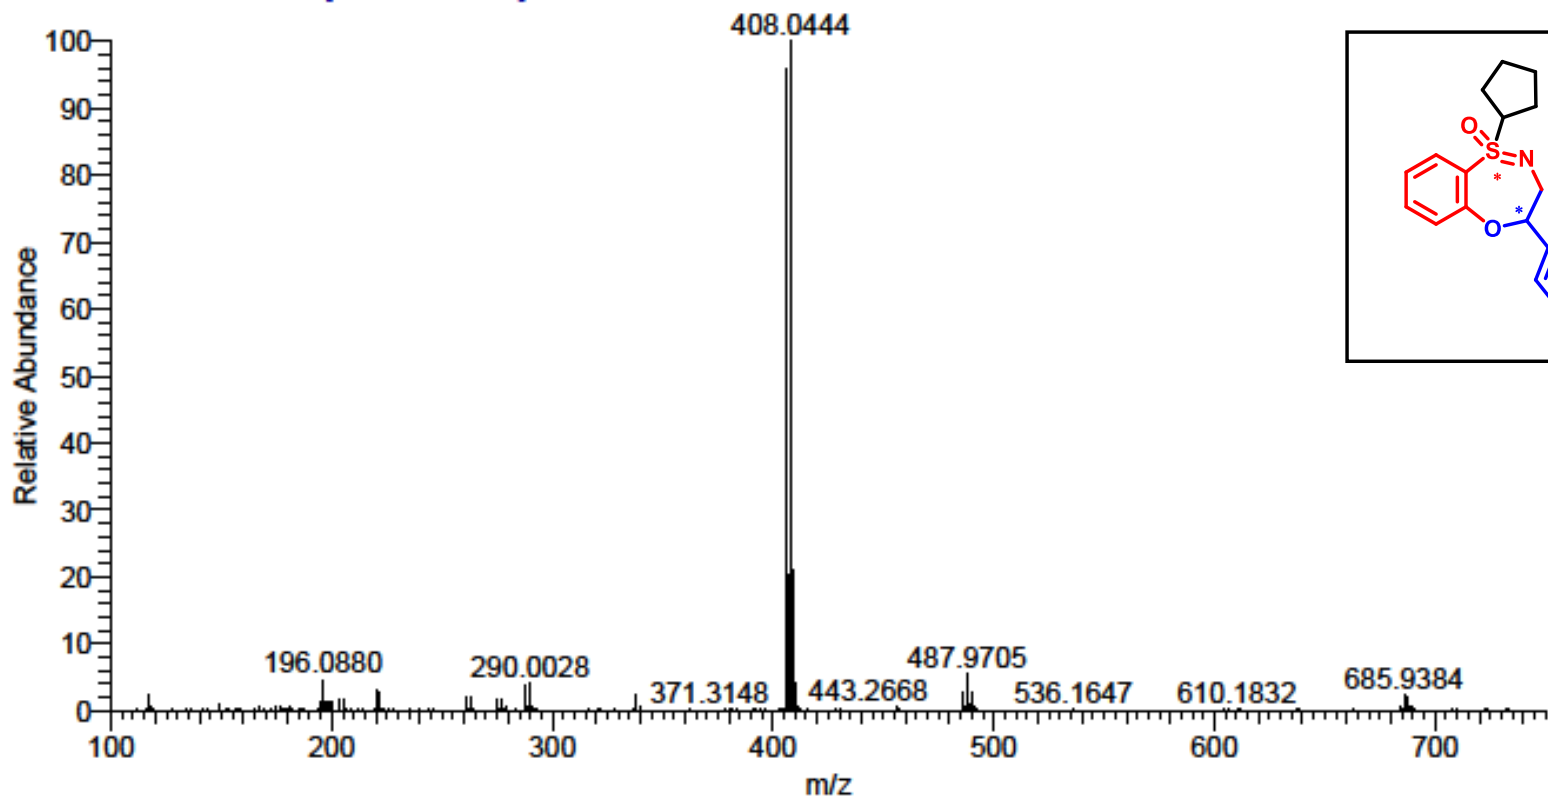

Fig S-107: HRMS report of Compound 4o'



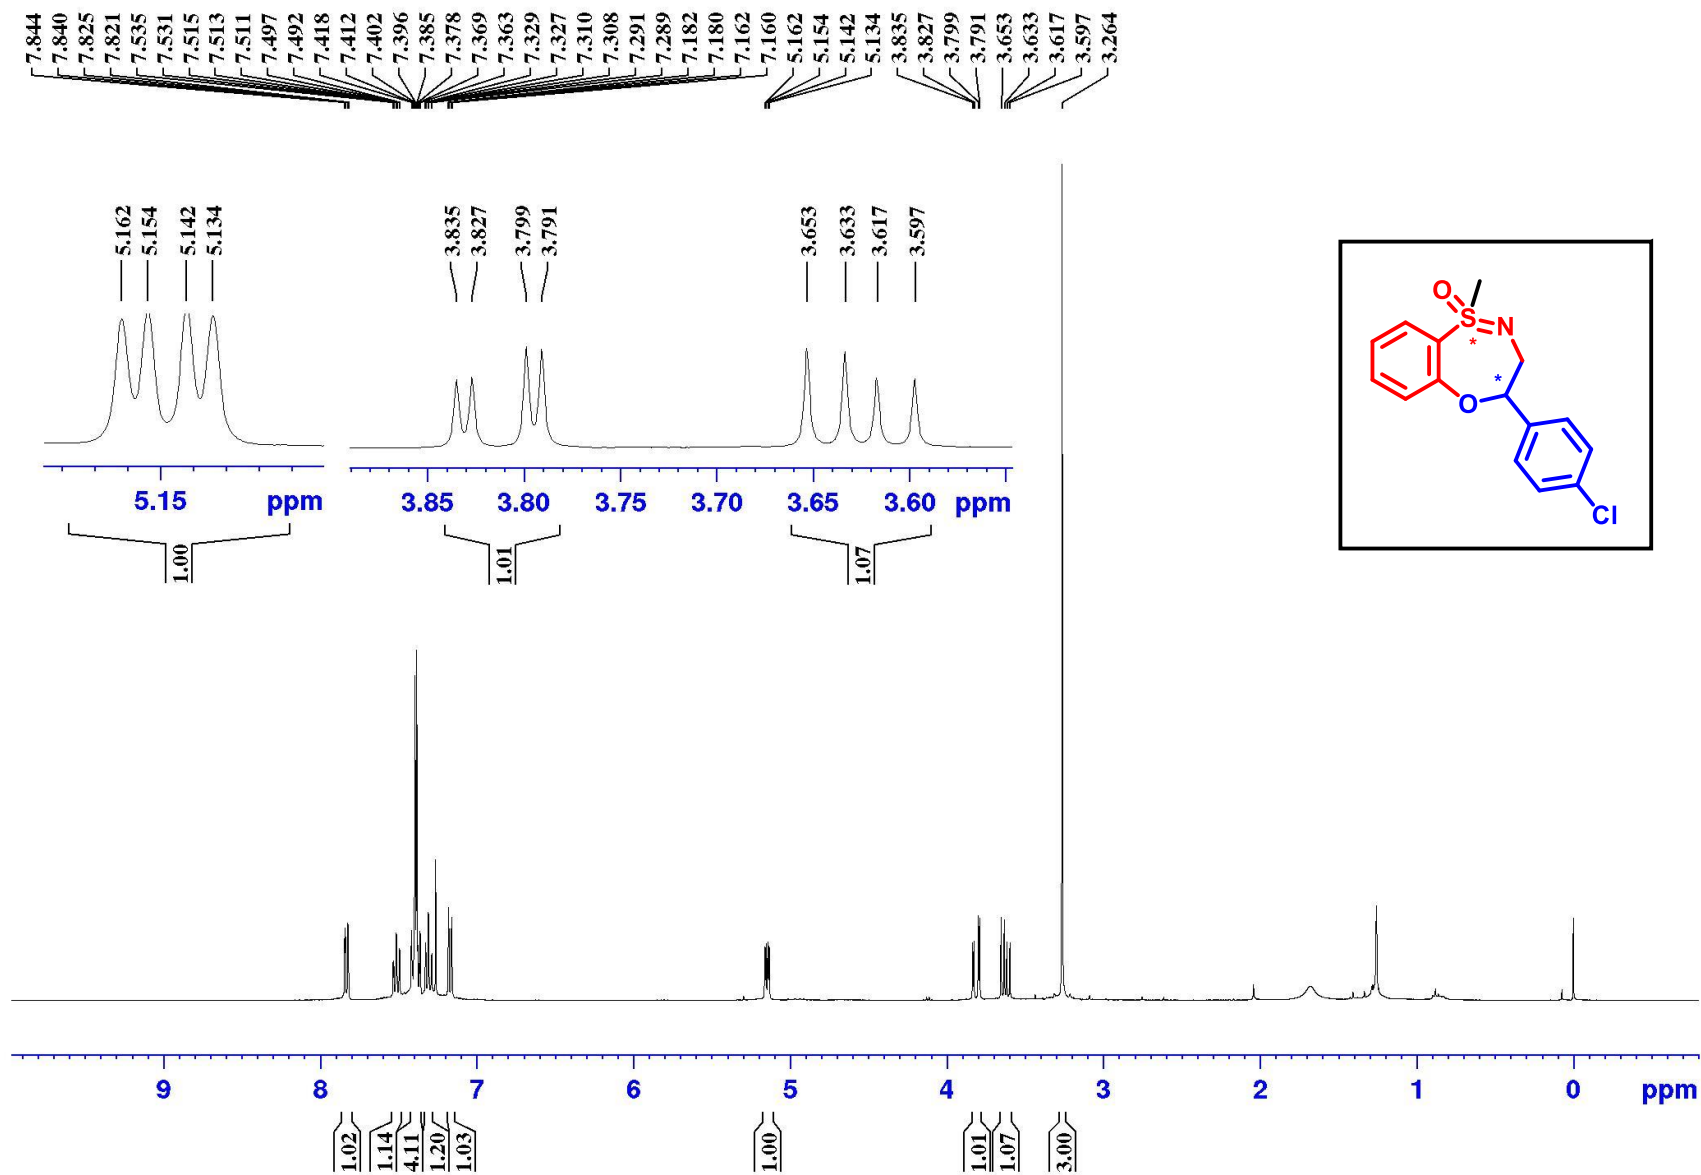

**Fig S-108:** <sup>1</sup>H NMR Spectra of Compound **4p** (400 MHz, CDCl<sub>3</sub>)

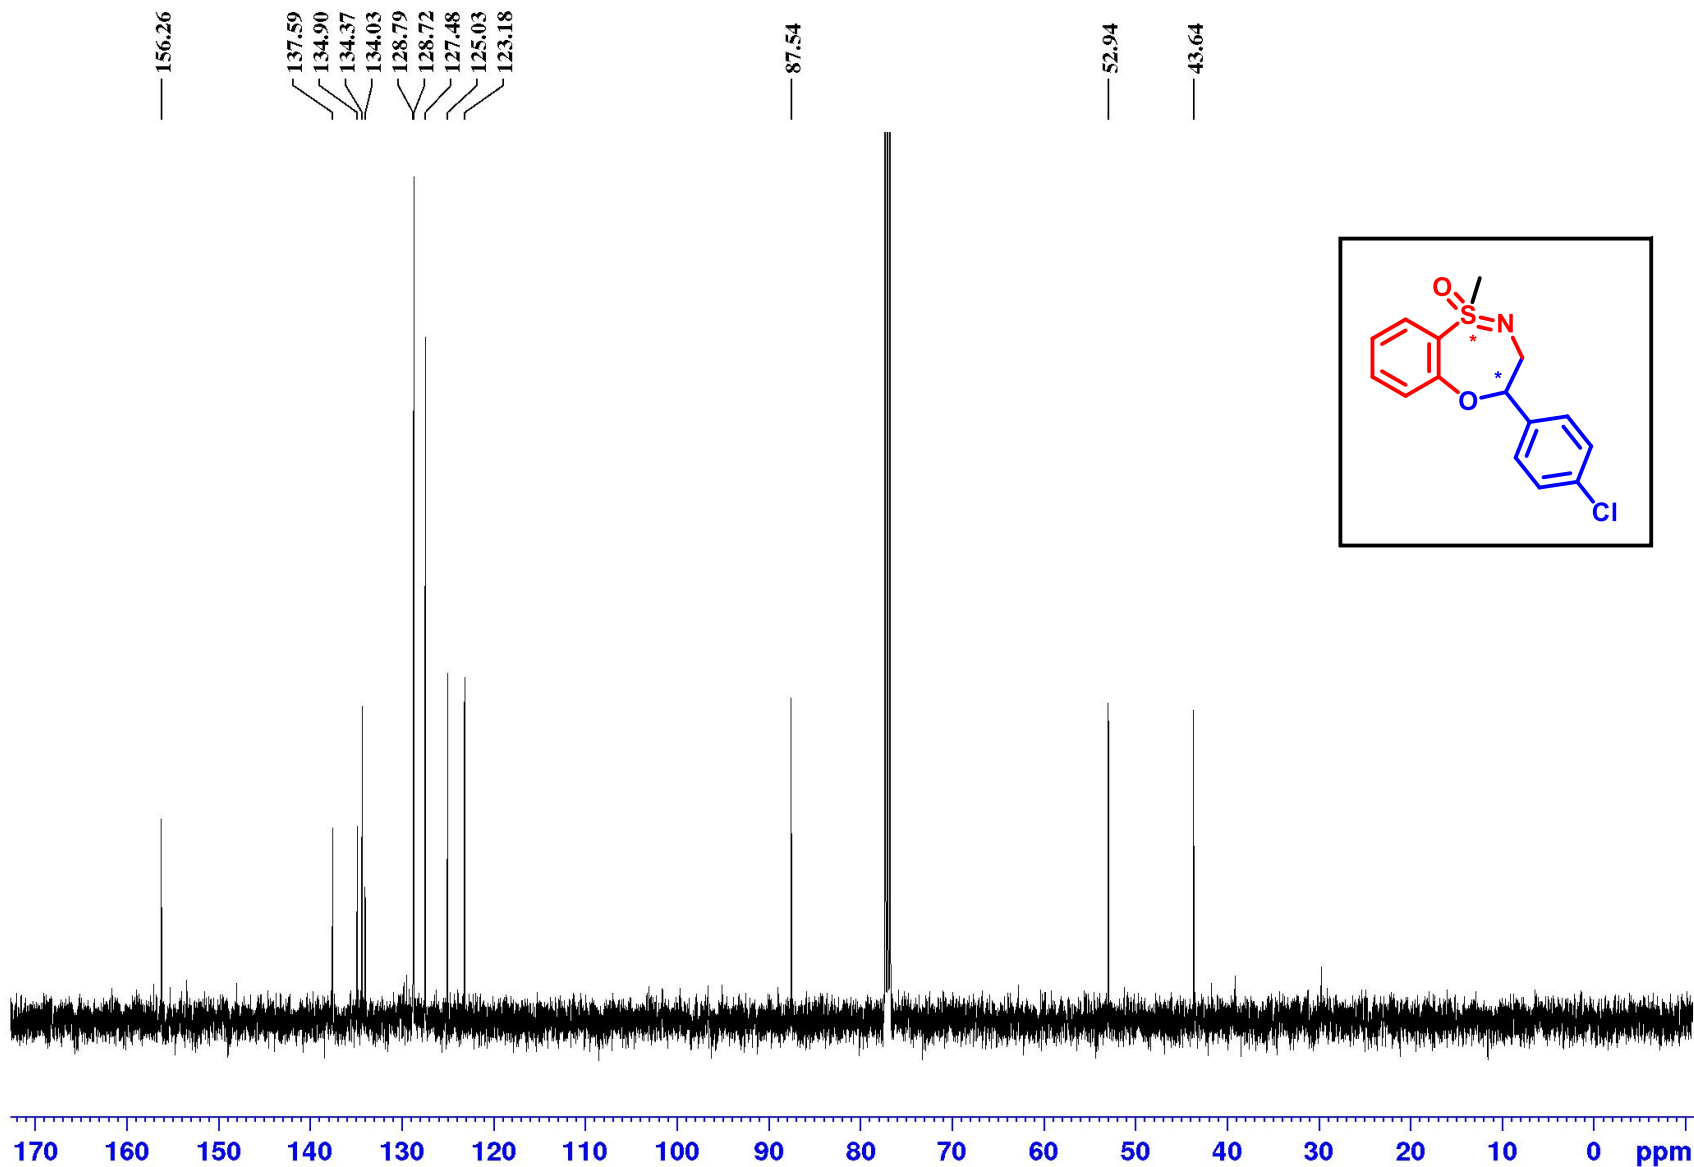

**Fig S-109:**  $^{13}\text{C}$  NMR Spectra of Compound **4p** (125 MHz,  $\text{CDCl}_3$ )

|               |                  |             |             |                 |              |                        |                      |
|---------------|------------------|-------------|-------------|-----------------|--------------|------------------------|----------------------|
| Sample Name   | ASA 1610         | Position    | Vial 24     | Instrument Name | Instrument 1 | User Name              |                      |
| Inj Vol       | 1                | InjPosition |             | SampleType      | Sample       | IRM Calibration Status | Some Ions Missed     |
| Data Filename | HRMS22I29APR24.d | ACQ Method  | ISOCRATIC.m | Comment         |              | Acquired Time          | 4/29/2022 1:39:29 PM |

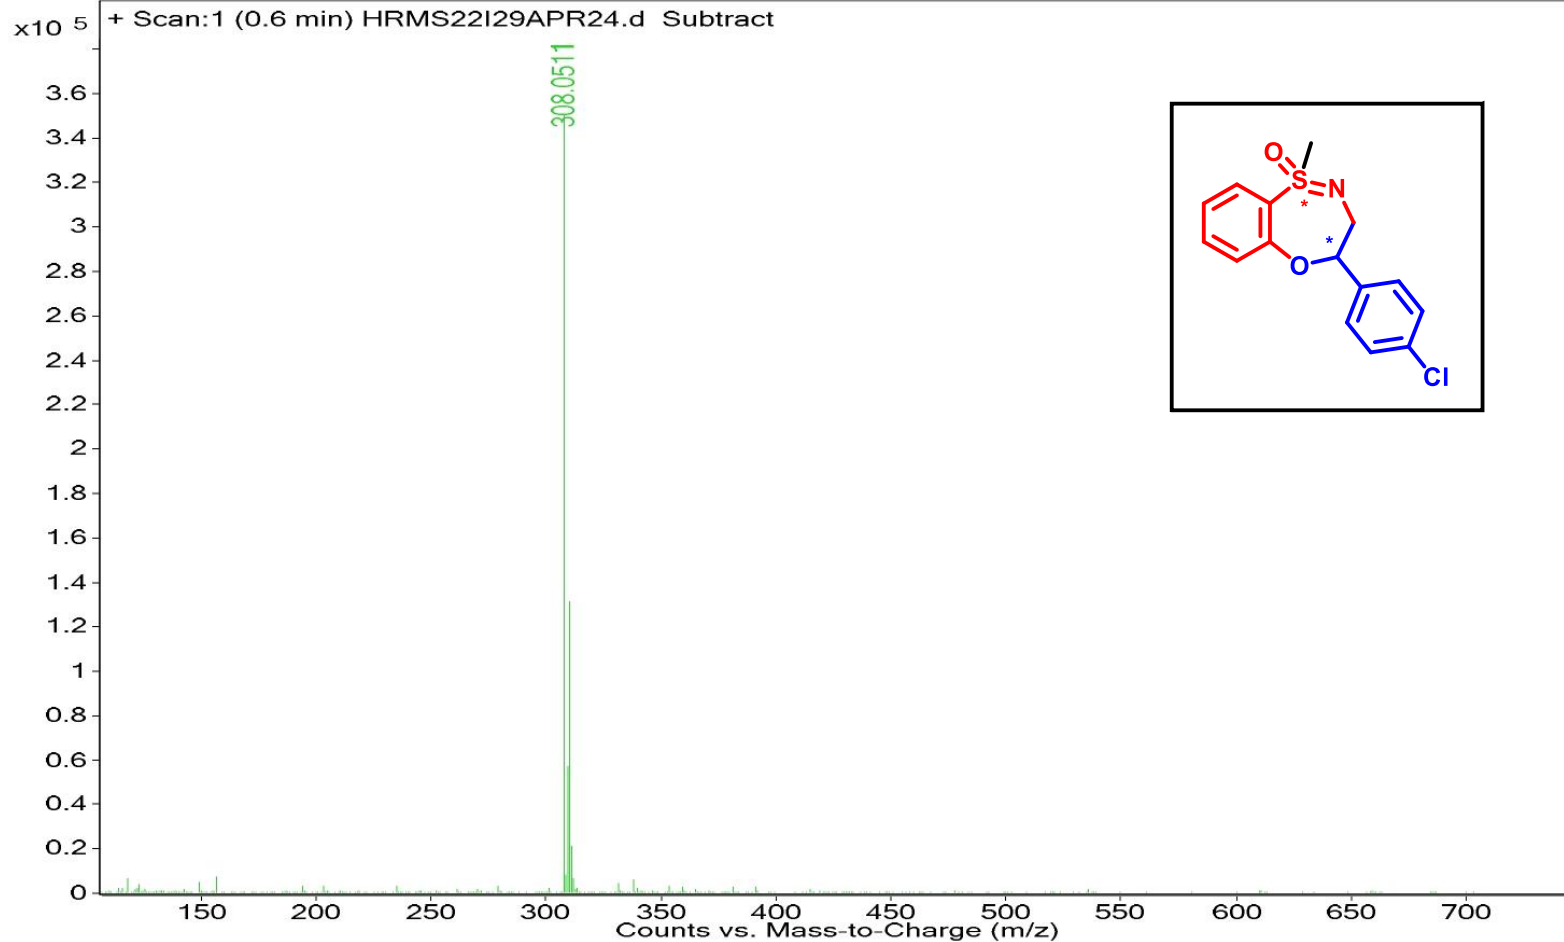

**Fig S-110:** HRMS report of Compound **4p**

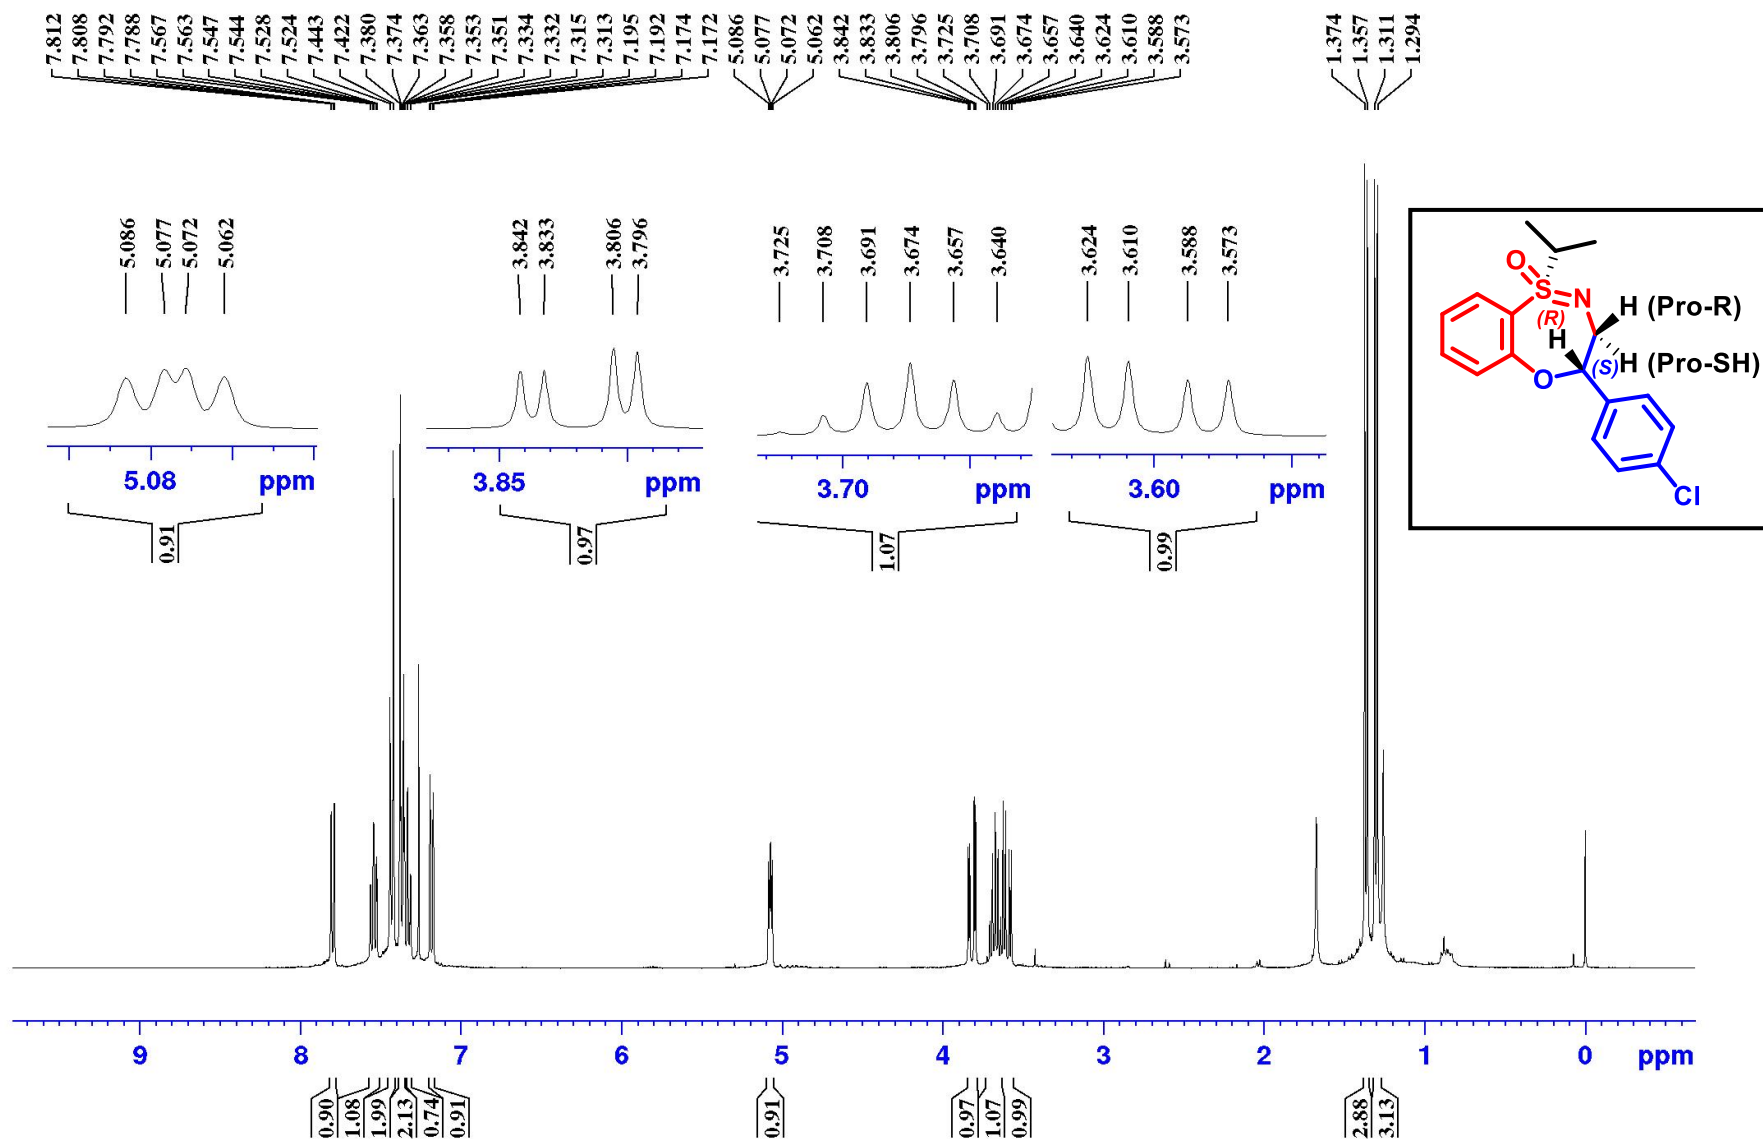

**Fig S-111: <sup>1</sup>H NMR Spectra of Compound (S,R) 4q (400 MHz, CDCl<sub>3</sub>)**

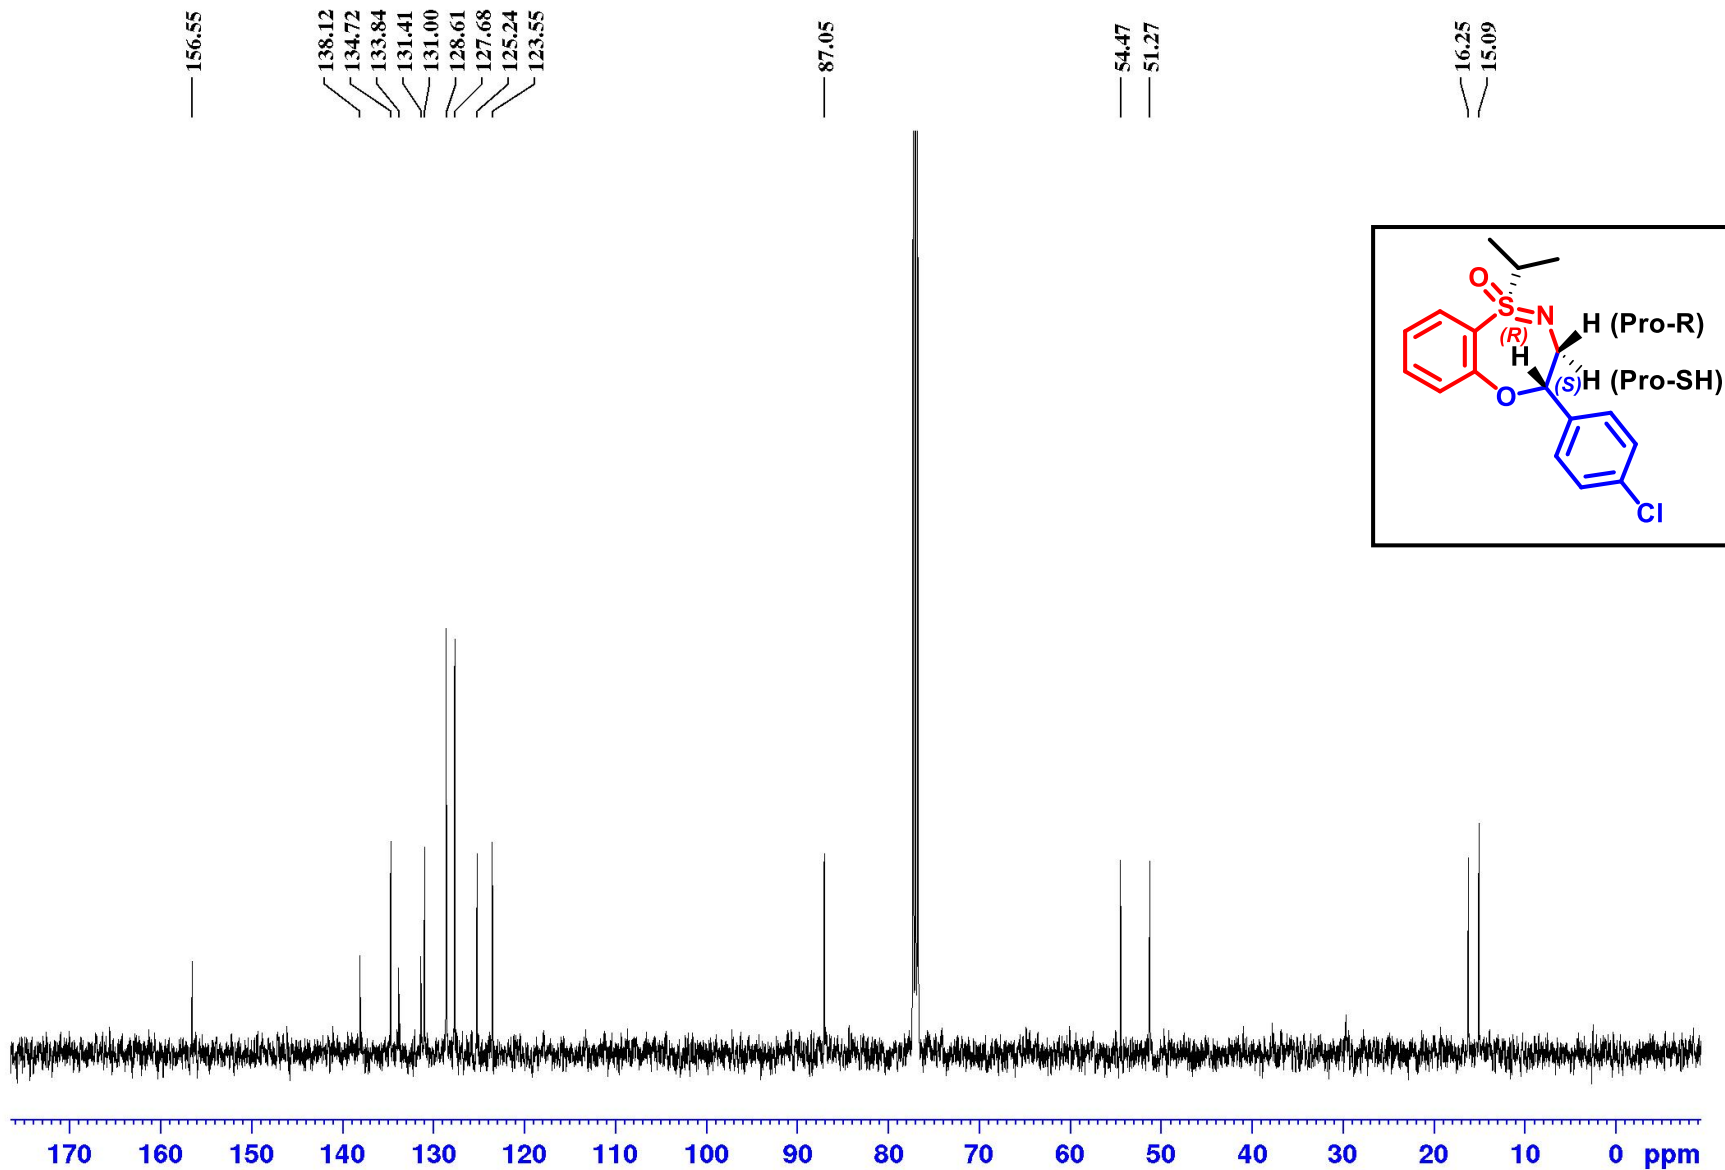

Fig S-112:  $^{13}\text{C}$  NMR Spectra of Compound (*S,R*) 4q (125 MHz,  $\text{CDCl}_3$ )

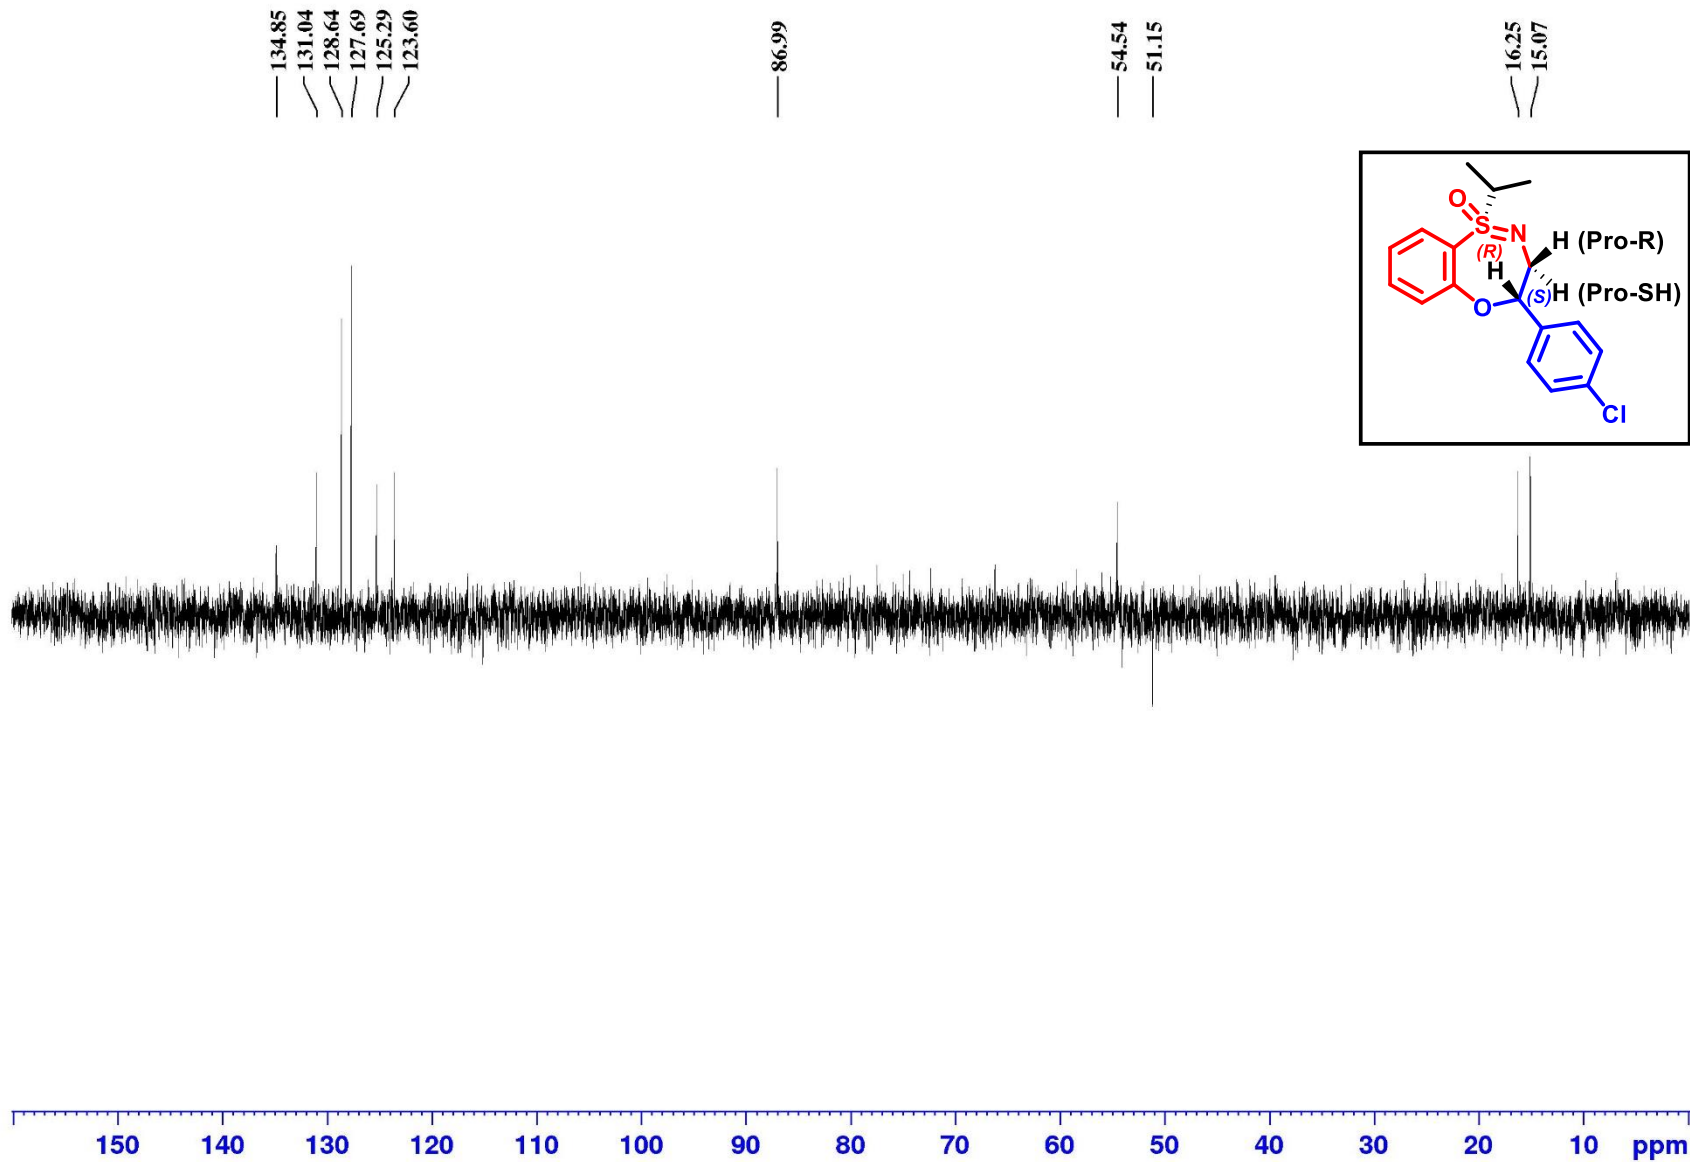

**Fig S-113: DEPT 135 Spectra of Compound (*S,R*) 4q (100 MHz, CDCl<sub>3</sub>)**

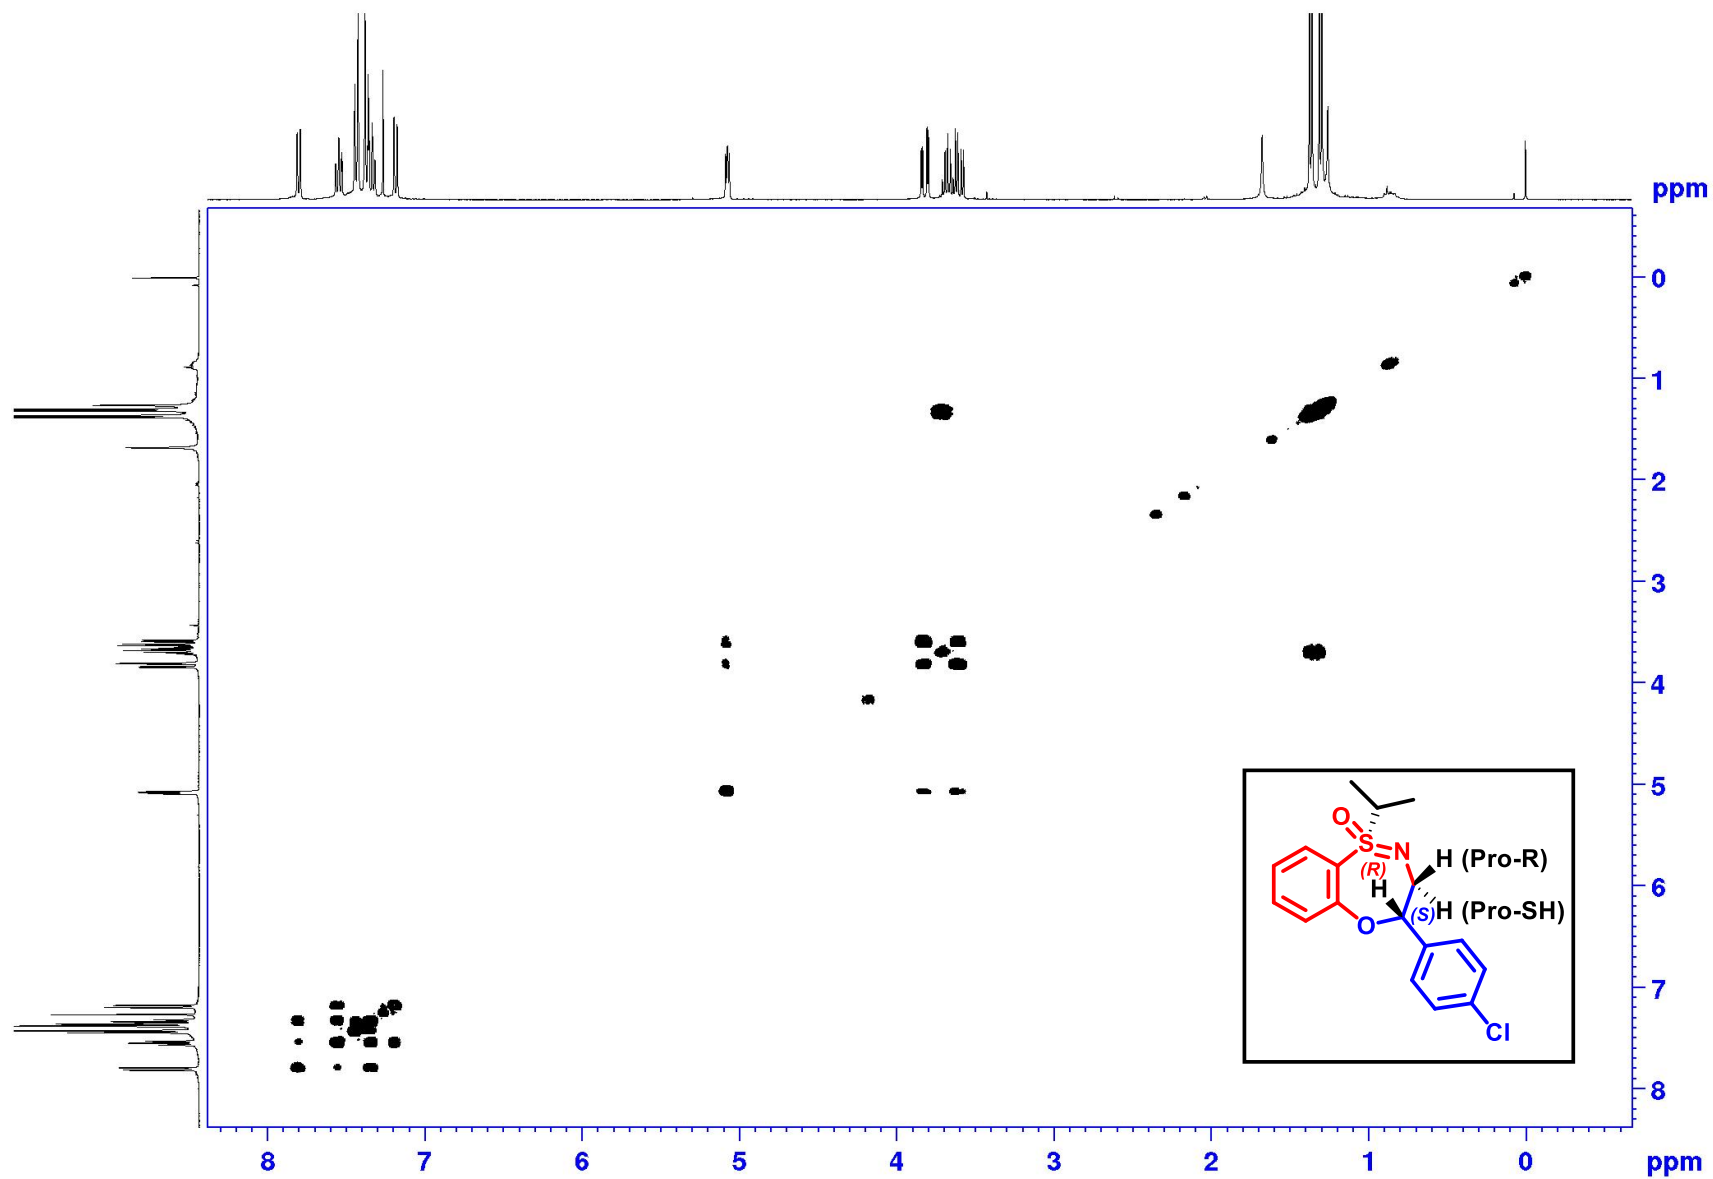

**Fig S-114:** COSY Spectra of Compound (*S,R*) 4q (400 MHz, CDCl<sub>3</sub>)

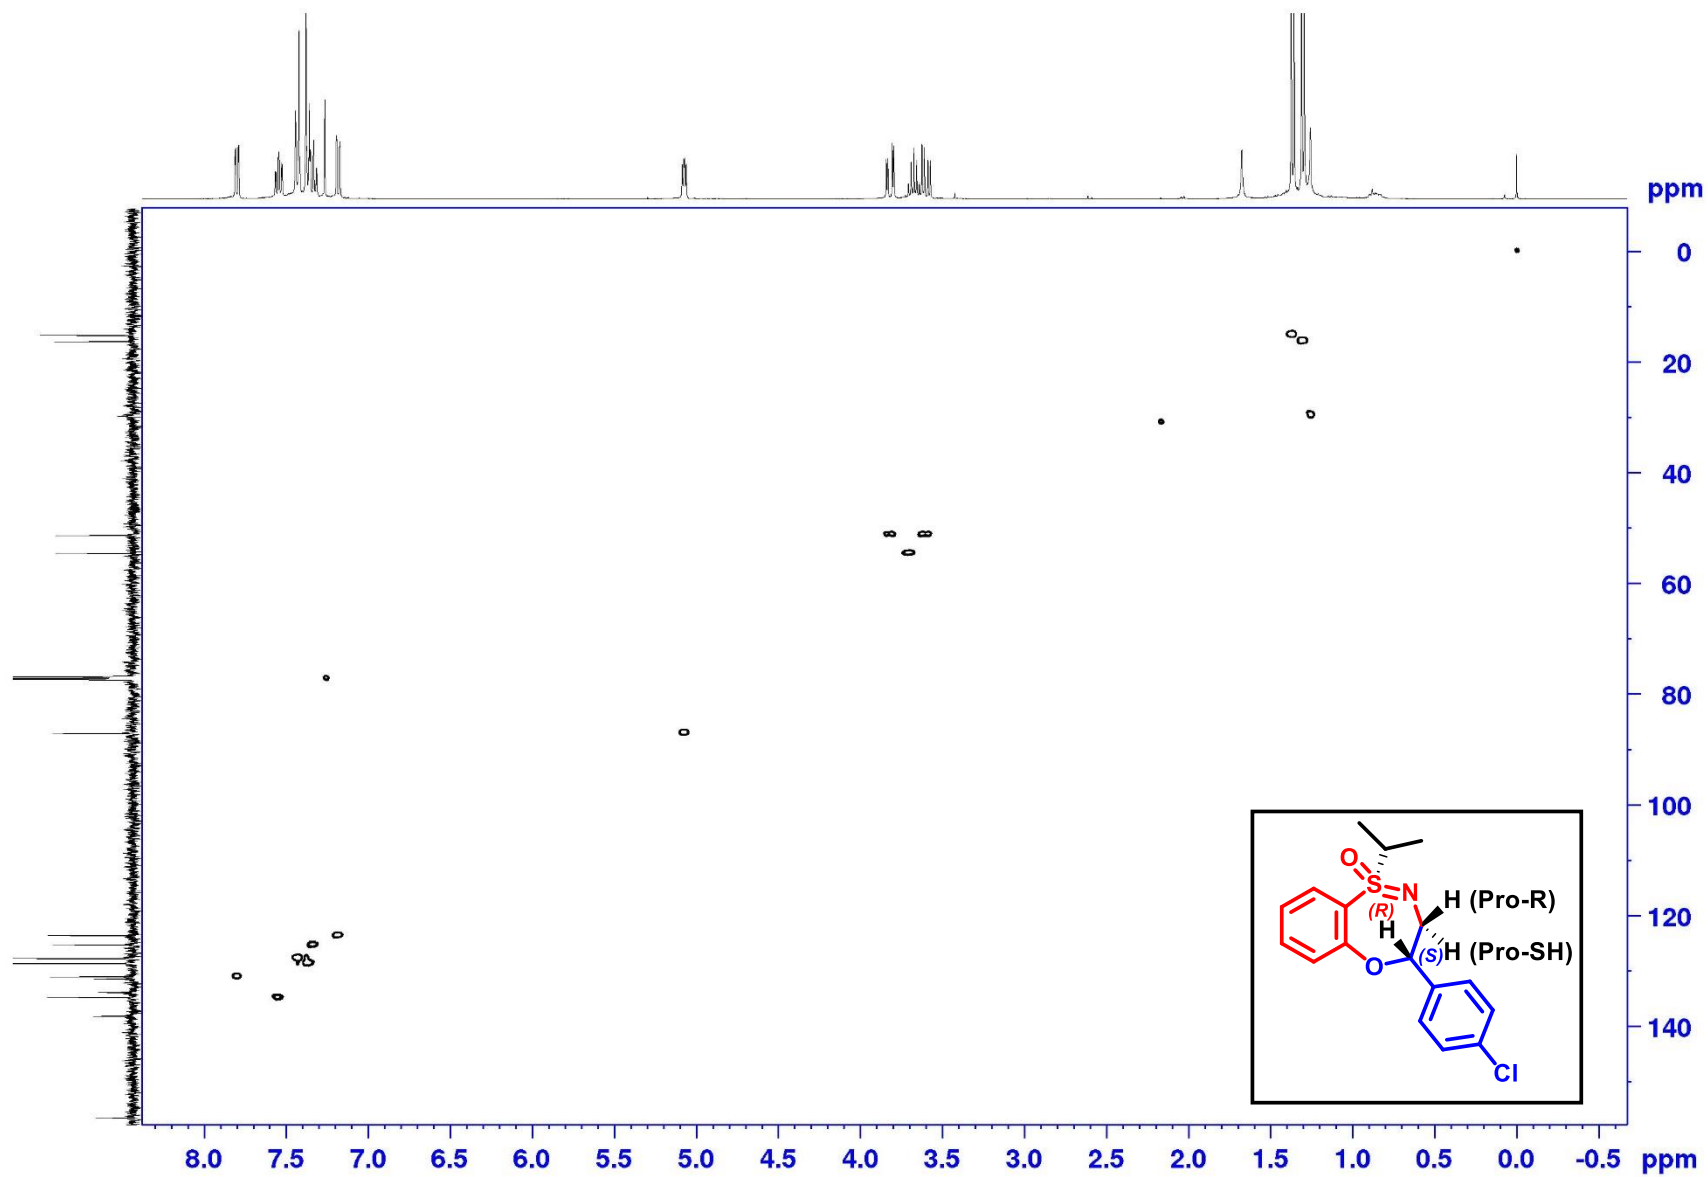

**Fig S-115:** HSQC Spectra of Compound (*S,R*) 4q (400 MHz, CDCl<sub>3</sub>)



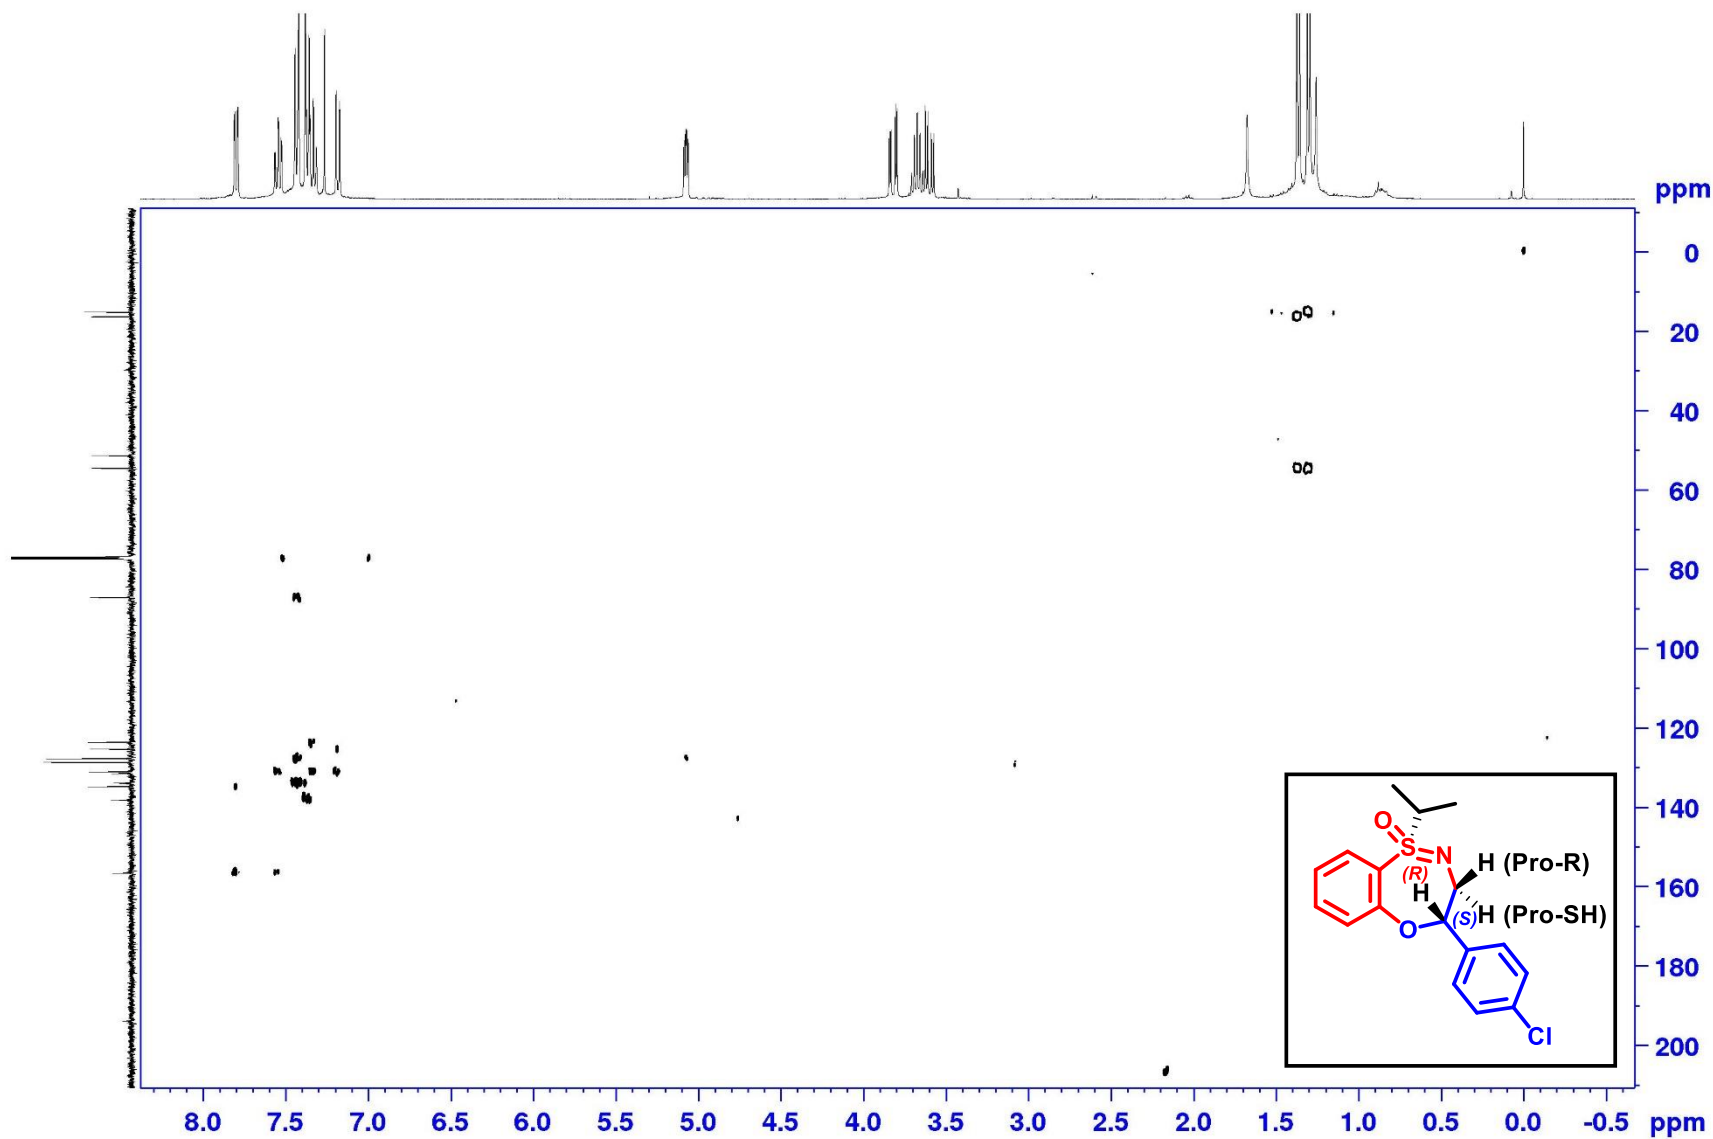

**Fig S-116:** HMBC Spectra of Compound (S,R) 4q (400 MHz, CDCl<sub>3</sub>)

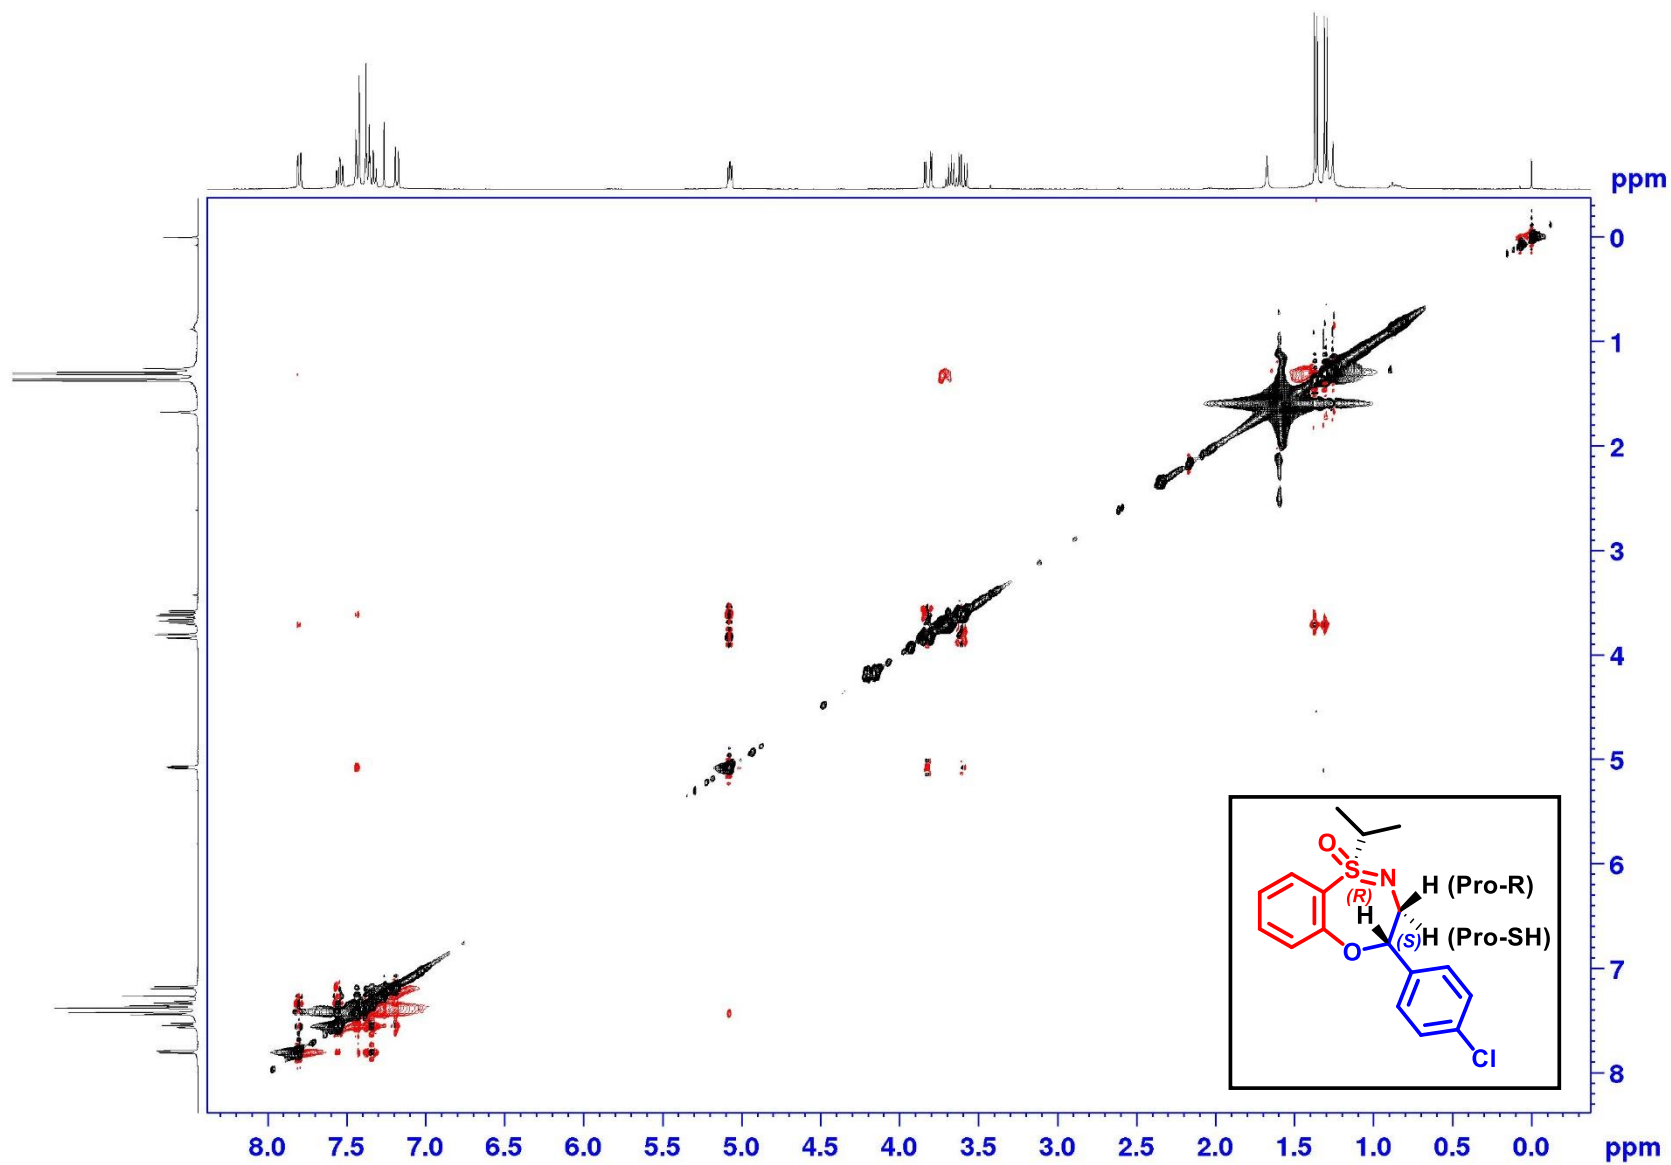

**Fig S-117:** NOESY Spectra of Compound (S,R) 4q (500 MHz, CDCl<sub>3</sub>)

### SAIF [HRMS Report]

|                   |                      |                       |                                 |
|-------------------|----------------------|-----------------------|---------------------------------|
| Data File:        | HRMS21I06APR14       | Original Data Path:   | D:\INTERNAL NEW\2021\April 2021 |
| Sample ID:        | AB-176A              | Sample Name:          |                                 |
| Acquisition Date: | 04/06/21 11:14:27 AM | Run Time(min):        | 0.00                            |
| Vial:             | CSik1-01:14          | Injection Volume(μl): | 1.00                            |

HRMS21I06APR14 #33-65 RT: 0.25-0.50 AV: 33 SB: 1 0.01 NL: 2.87E6  
T: FTMS + c ESI Full ms [100.00-750.00]

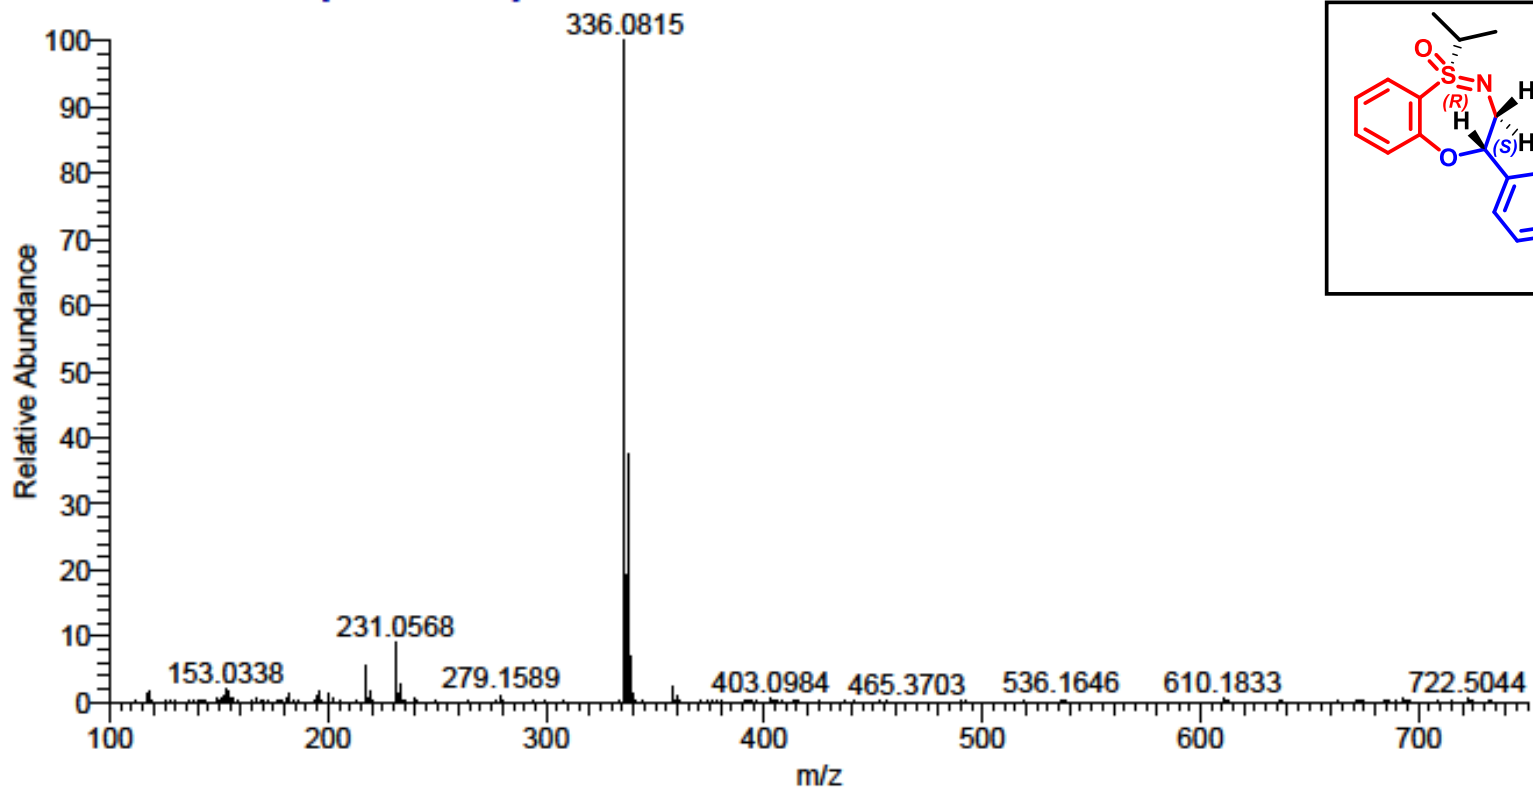

Fig S-118: HRMS report of Compound (S,R)-4q

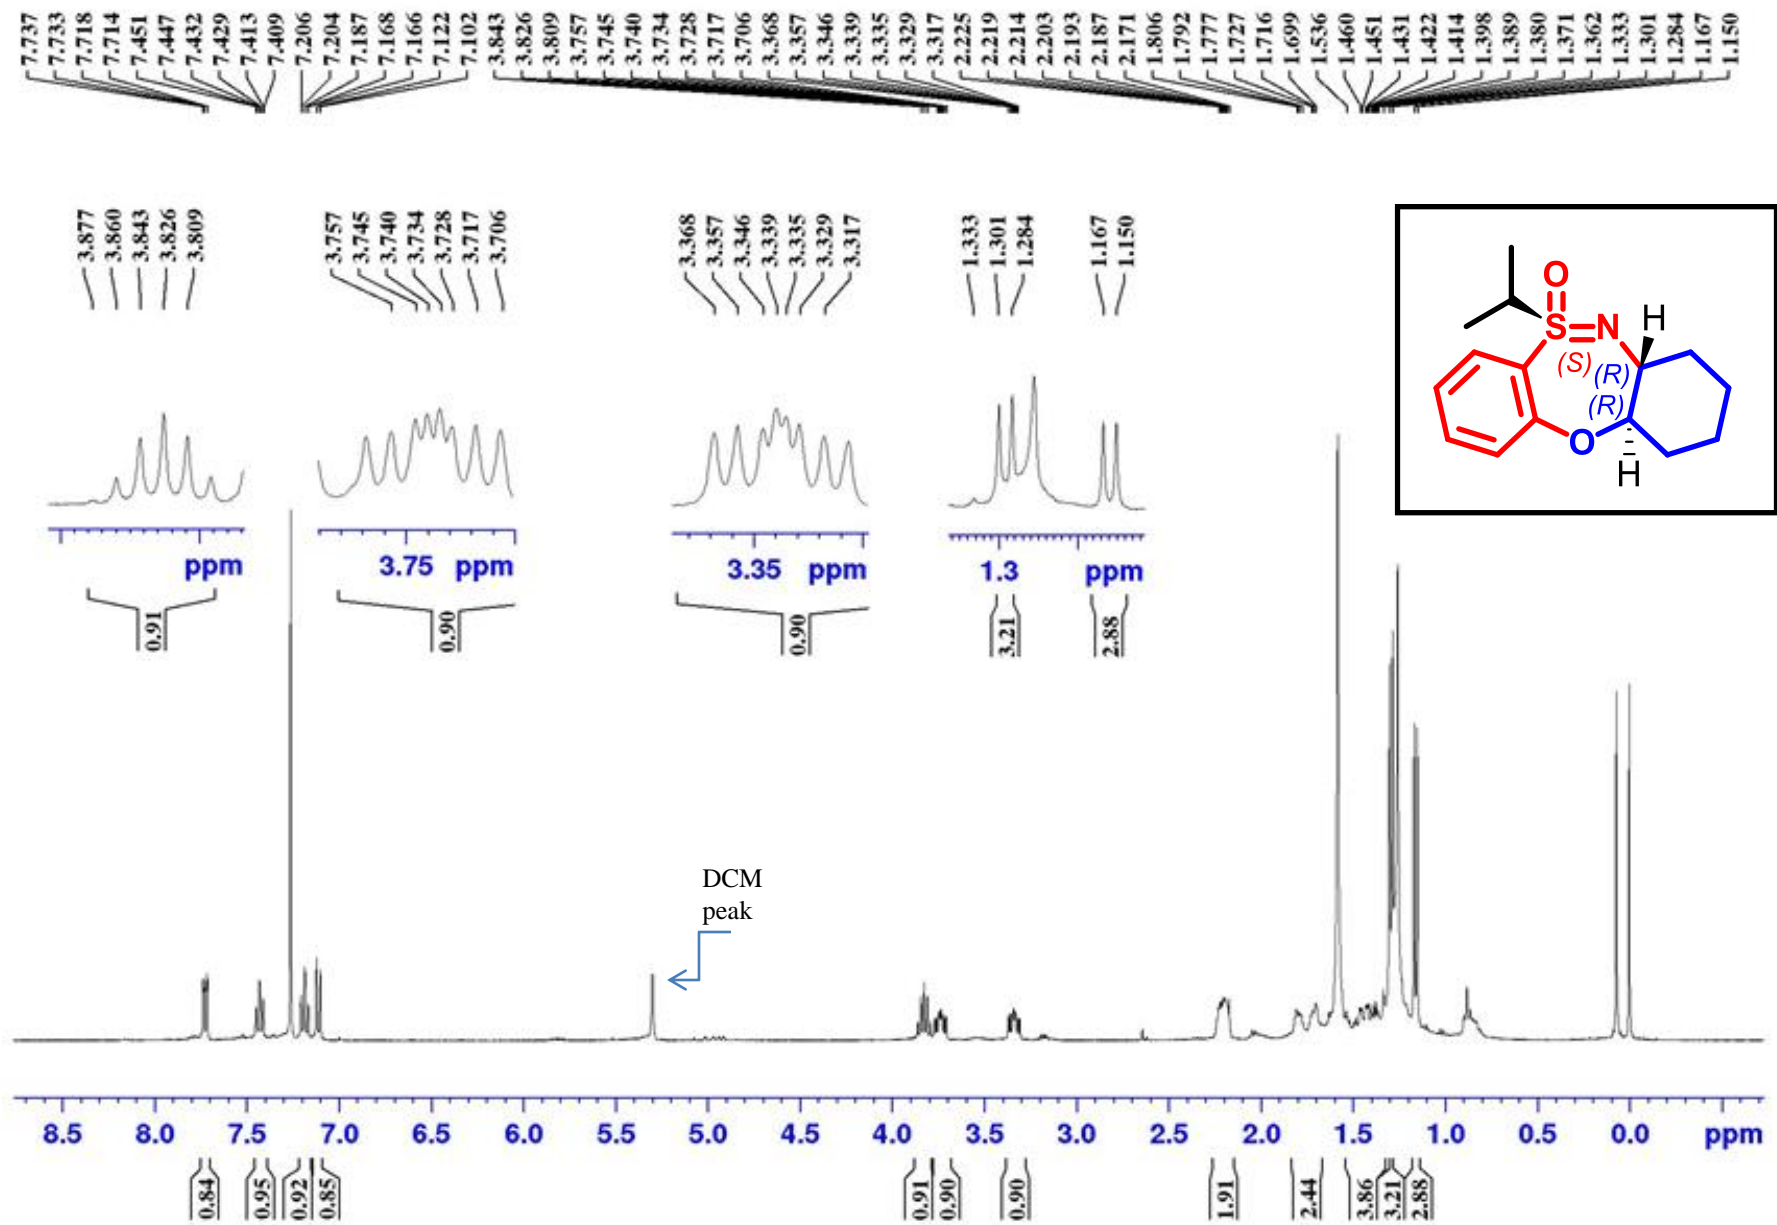

Fig S-119: <sup>1</sup>H NMR Spectra of Compound *(R,R,S)*-4r (400 MHz, CDCl<sub>3</sub>)

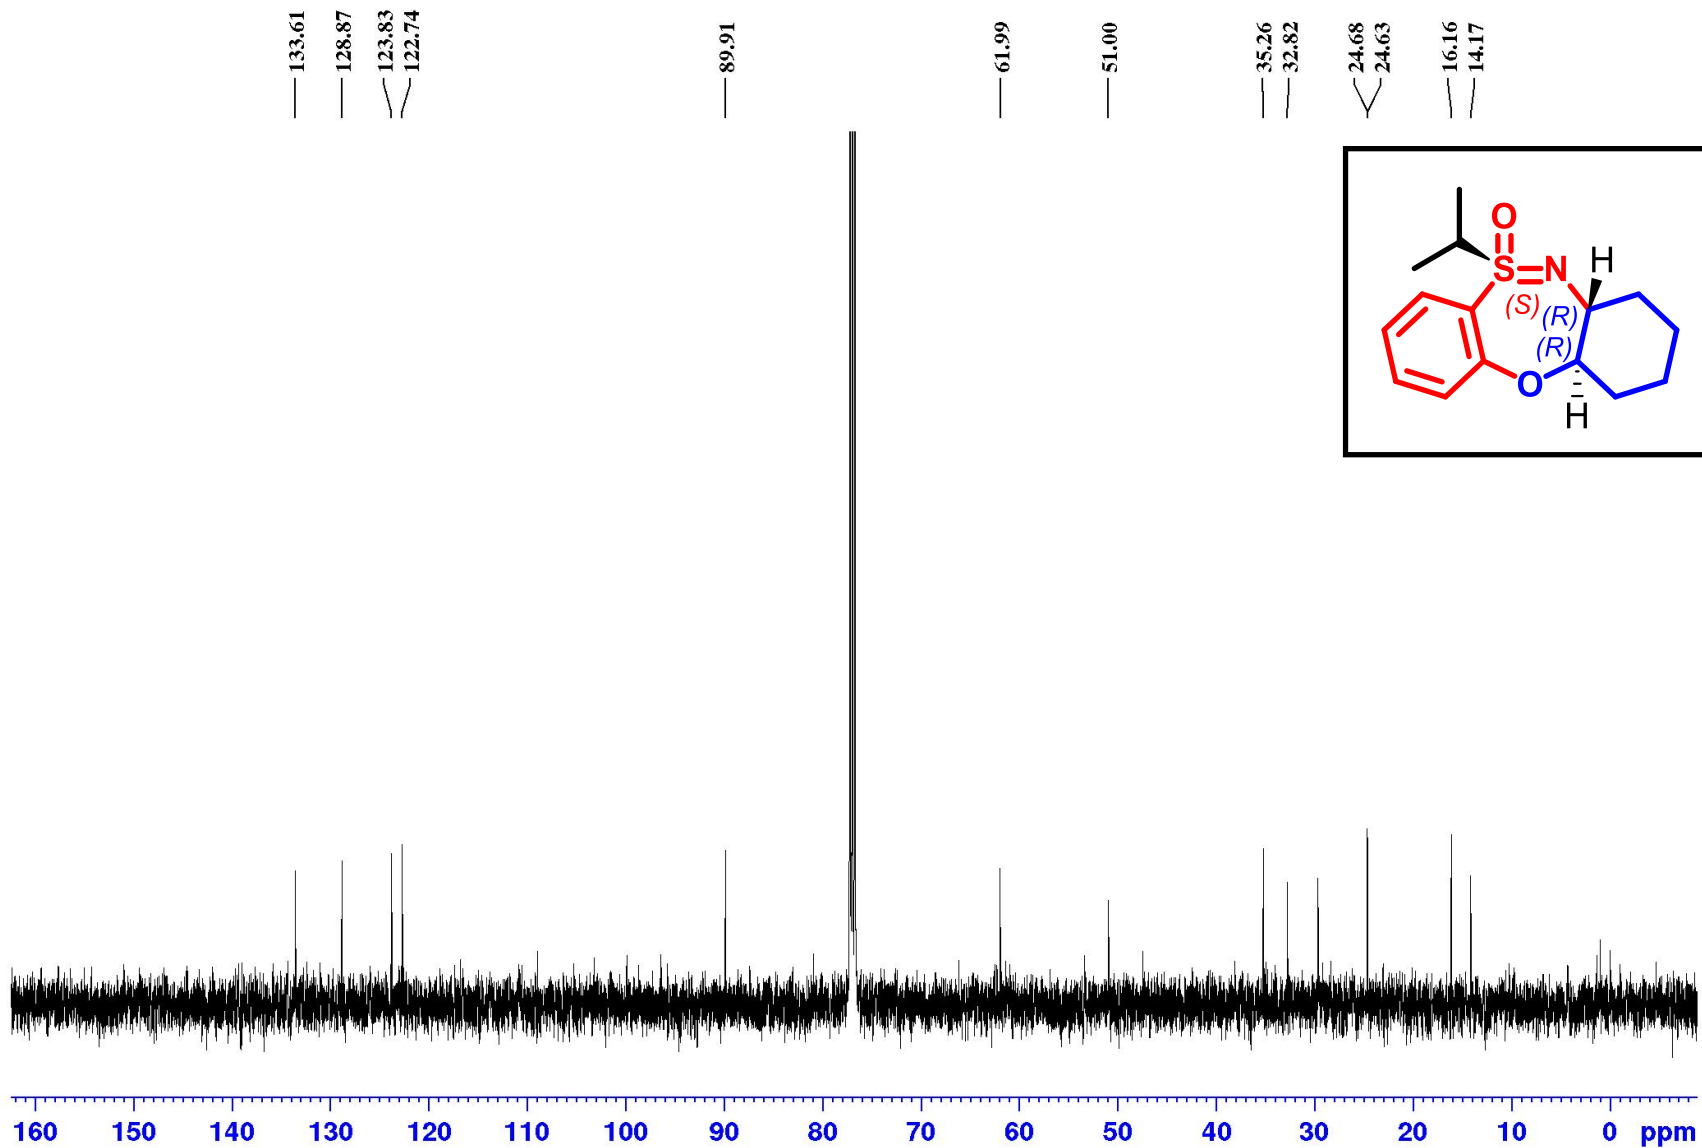

**Fig S-120:**  $^{13}\text{C}$  NMR Spectra of Compound *(R,R,S)*-4r (125 MHz,  $\text{CDCl}_3$ )

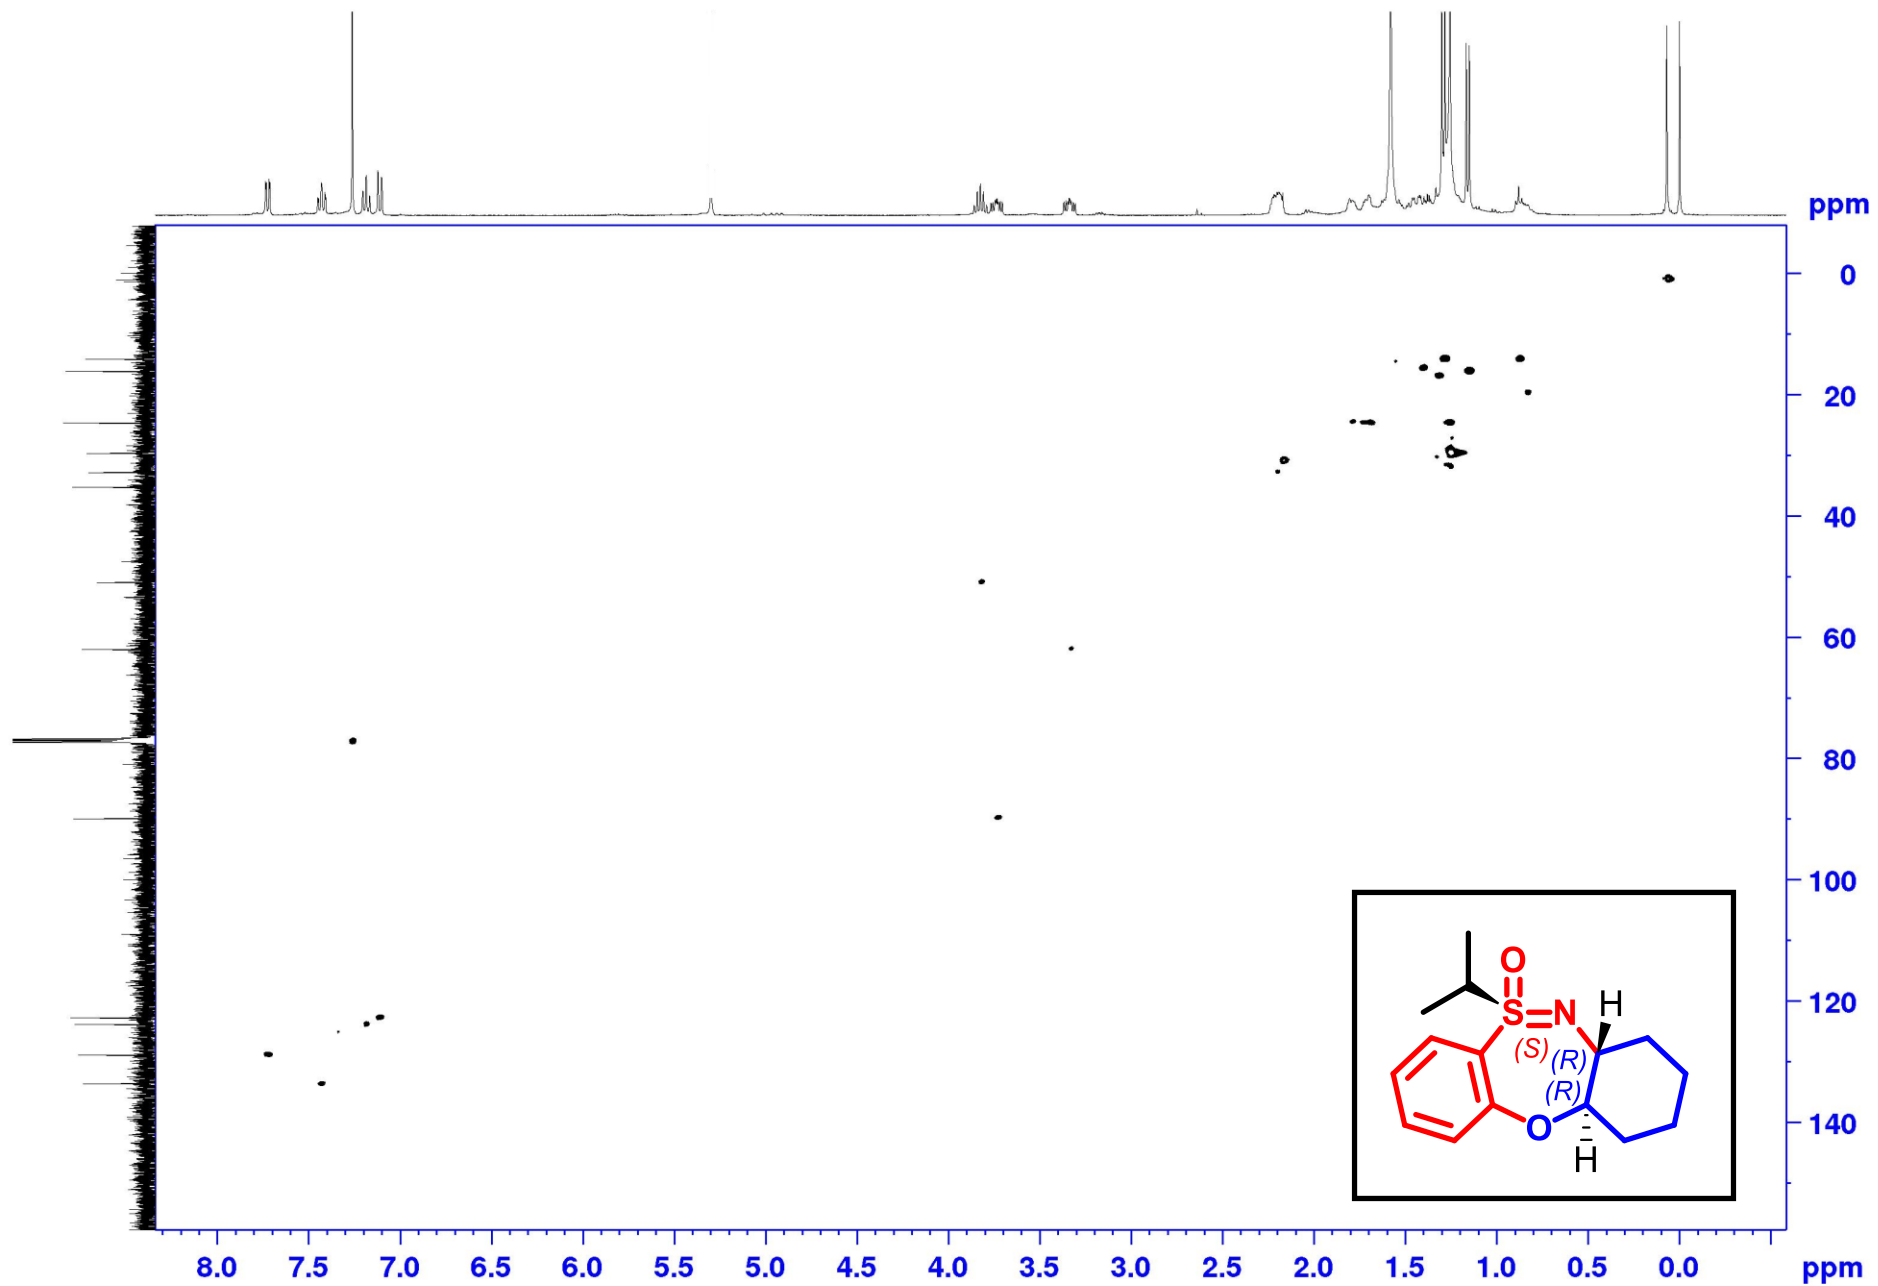

**Fig S-121:** HSQC Spectra of Compound **(R,R,S)-4r** (400 MHz,  $\text{CDCl}_3$ )

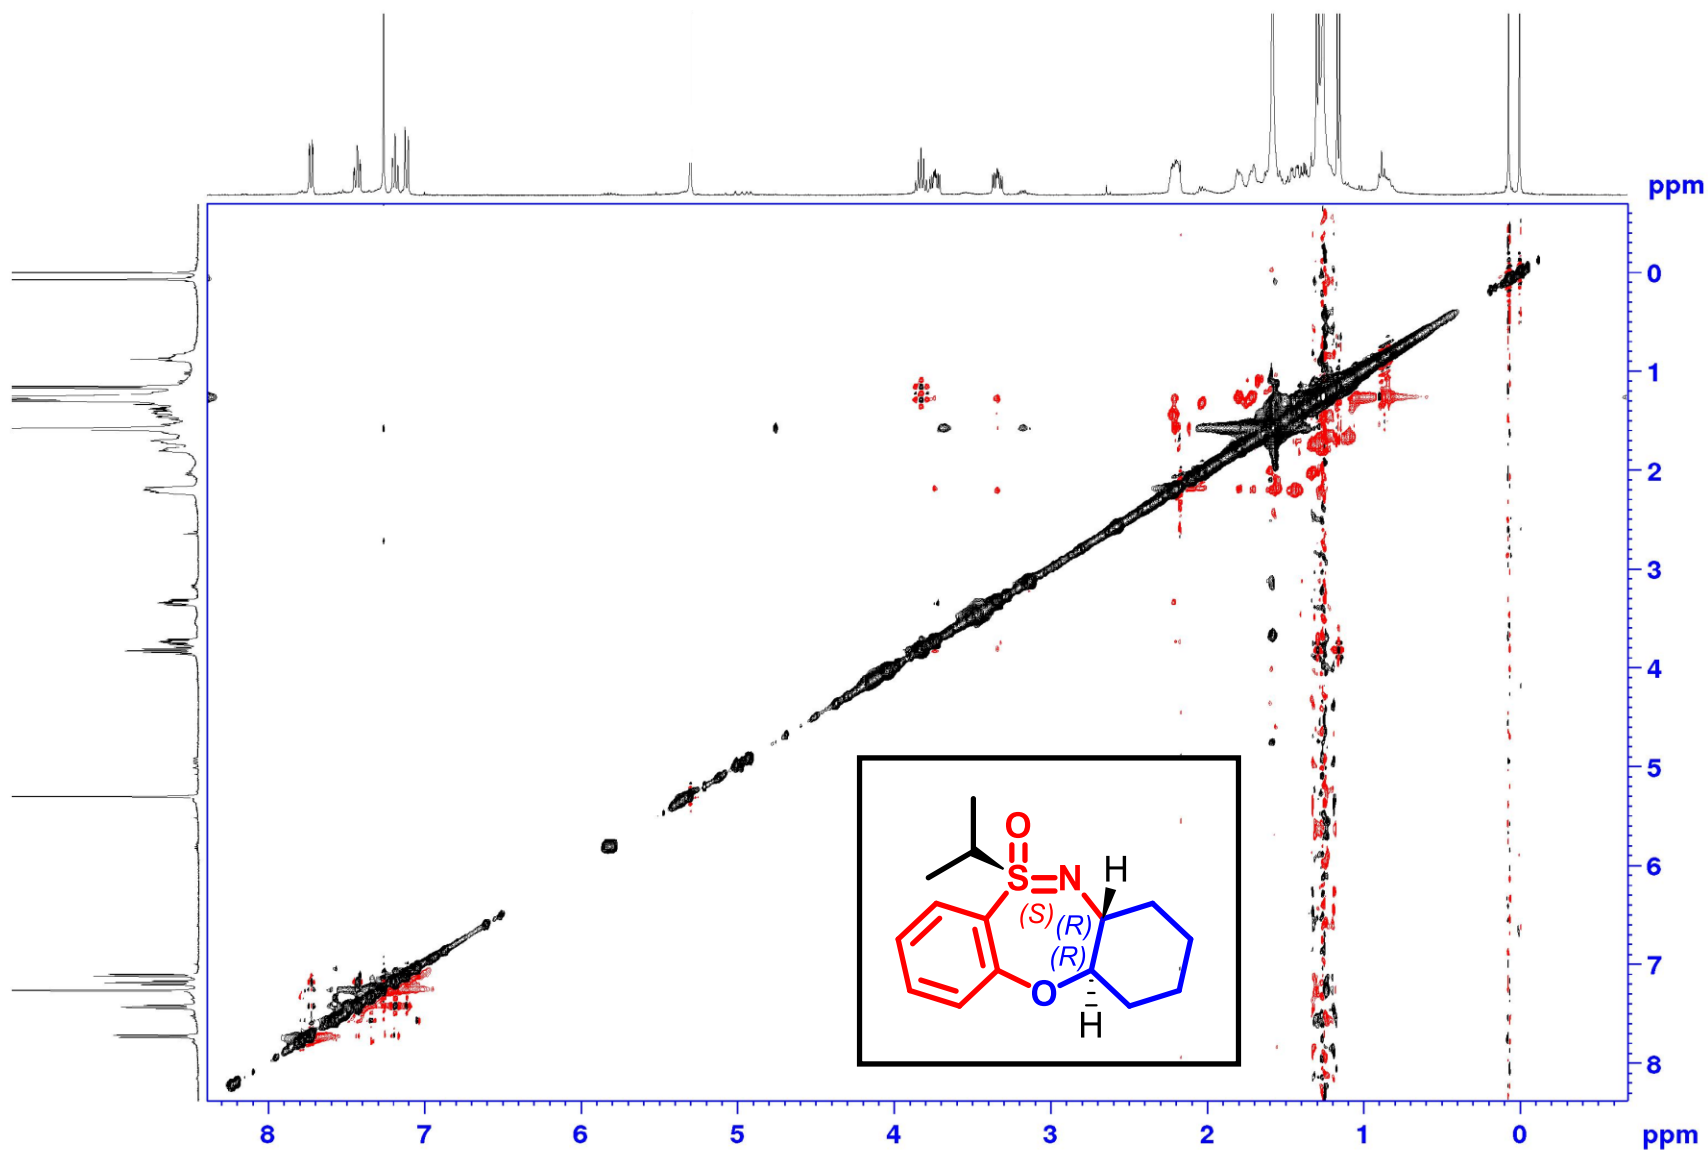

**Fig S-122:** NOESY Spectra of Compound (R,R,S)-4r (500 MHz, CDCl<sub>3</sub>)

|               |                  |             |             |                 |              |                        |                     |
|---------------|------------------|-------------|-------------|-----------------|--------------|------------------------|---------------------|
| Sample Name   | Ena-2            | Position    | Vial 26     | Instrument Name | Instrument 1 | User Name              |                     |
| Inj Vol       | 1                | InjPosition |             | SampleType      | Sample       | IRM Calibration Status | Some Ions Missed    |
| Data Filename | HRMS22102MAY26.d | ACQ Method  | ISOCRATIC.m | Comment         |              | Acquired Time          | 5/2/2022 1:49:14 PM |

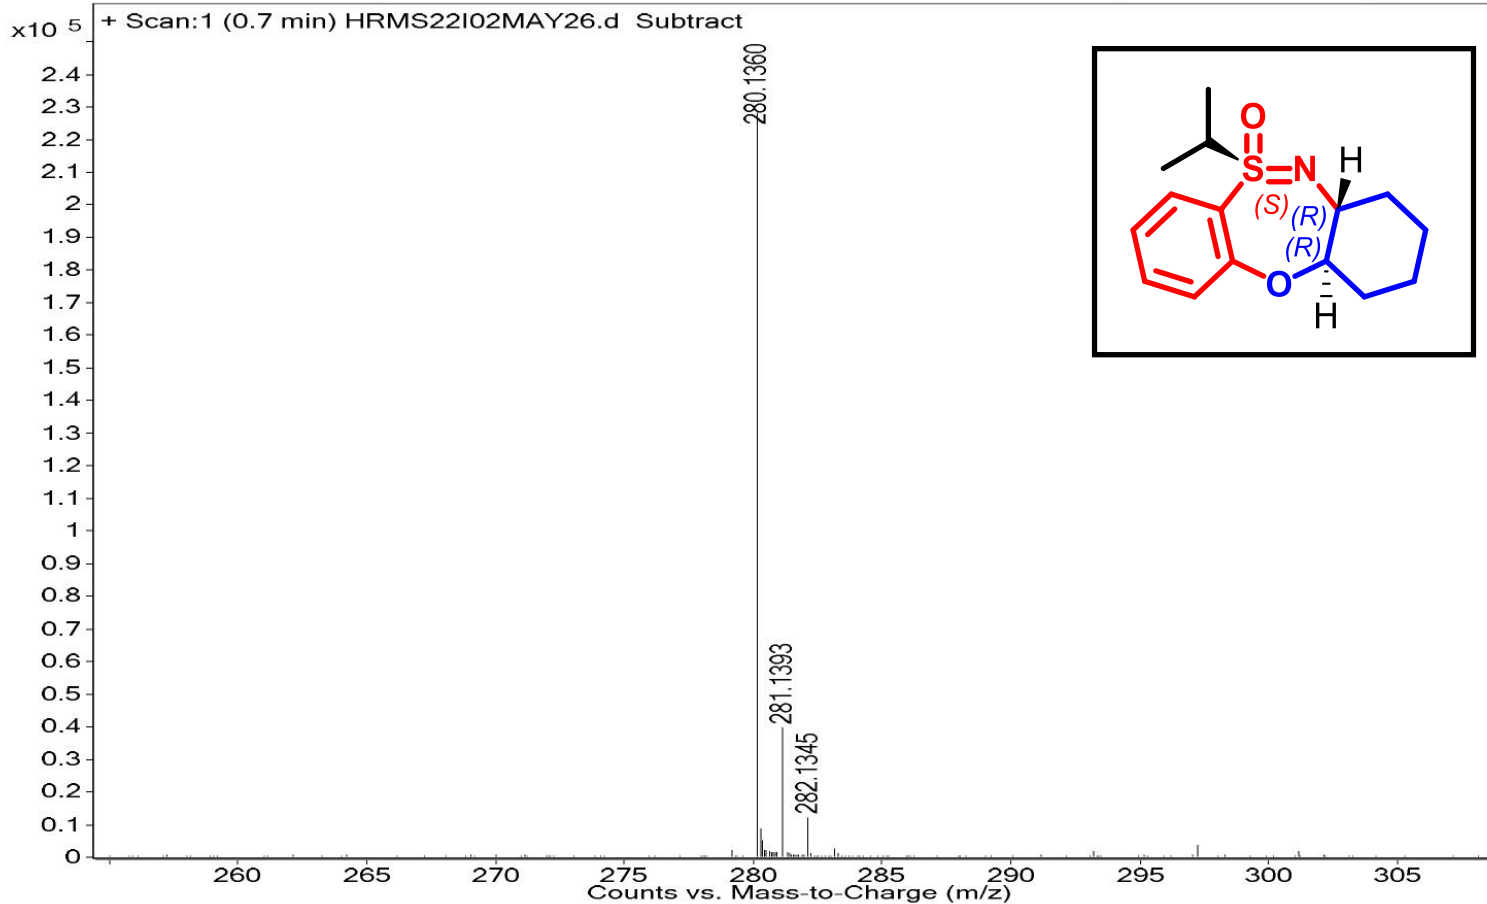

**Fig S-123:** HRMS report of Compound (*R,R,S*)-4r



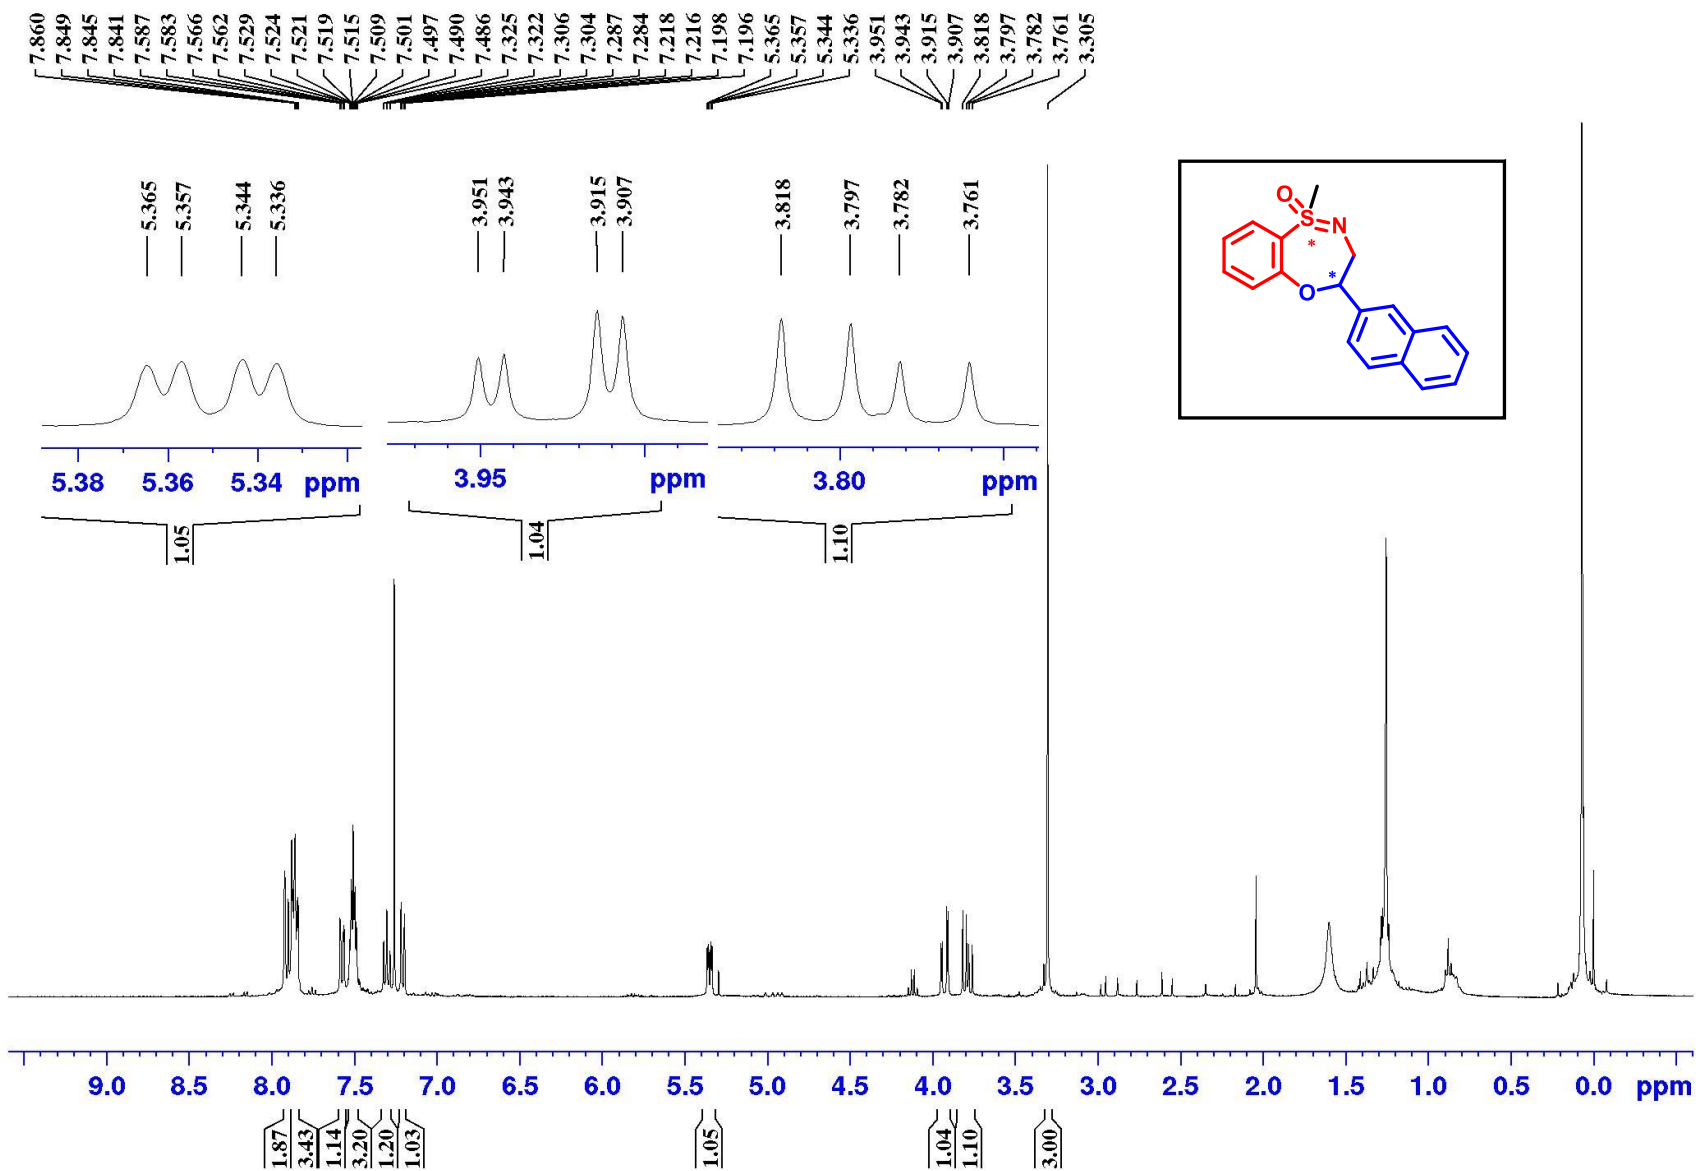

**Fig S-124:**  $^1\text{H}$  NMR Spectra of Compound **4s**(400 MHz,  $\text{CDCl}_3$ )

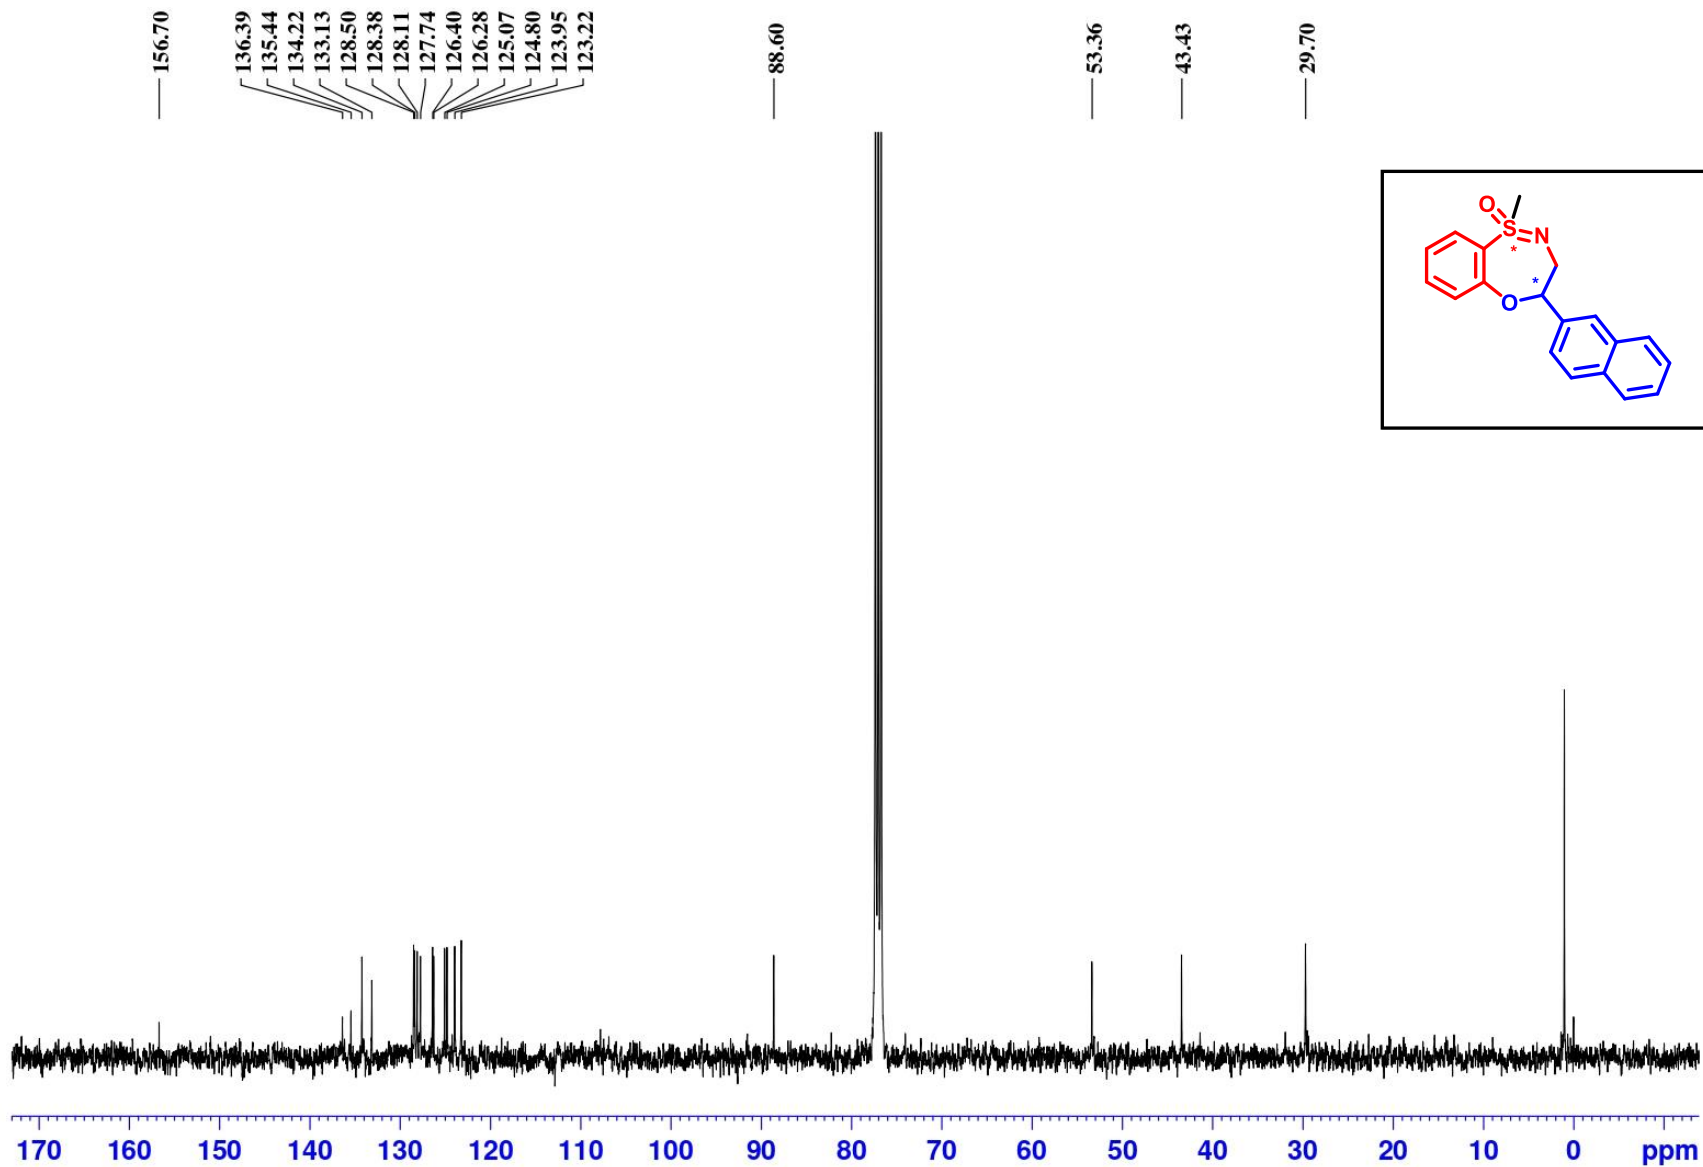

**Fig S-125:**  $^{13}\text{C}$  NMR Spectra of Compound **4s** (125 MHz,  $\text{CDCl}_3$ )

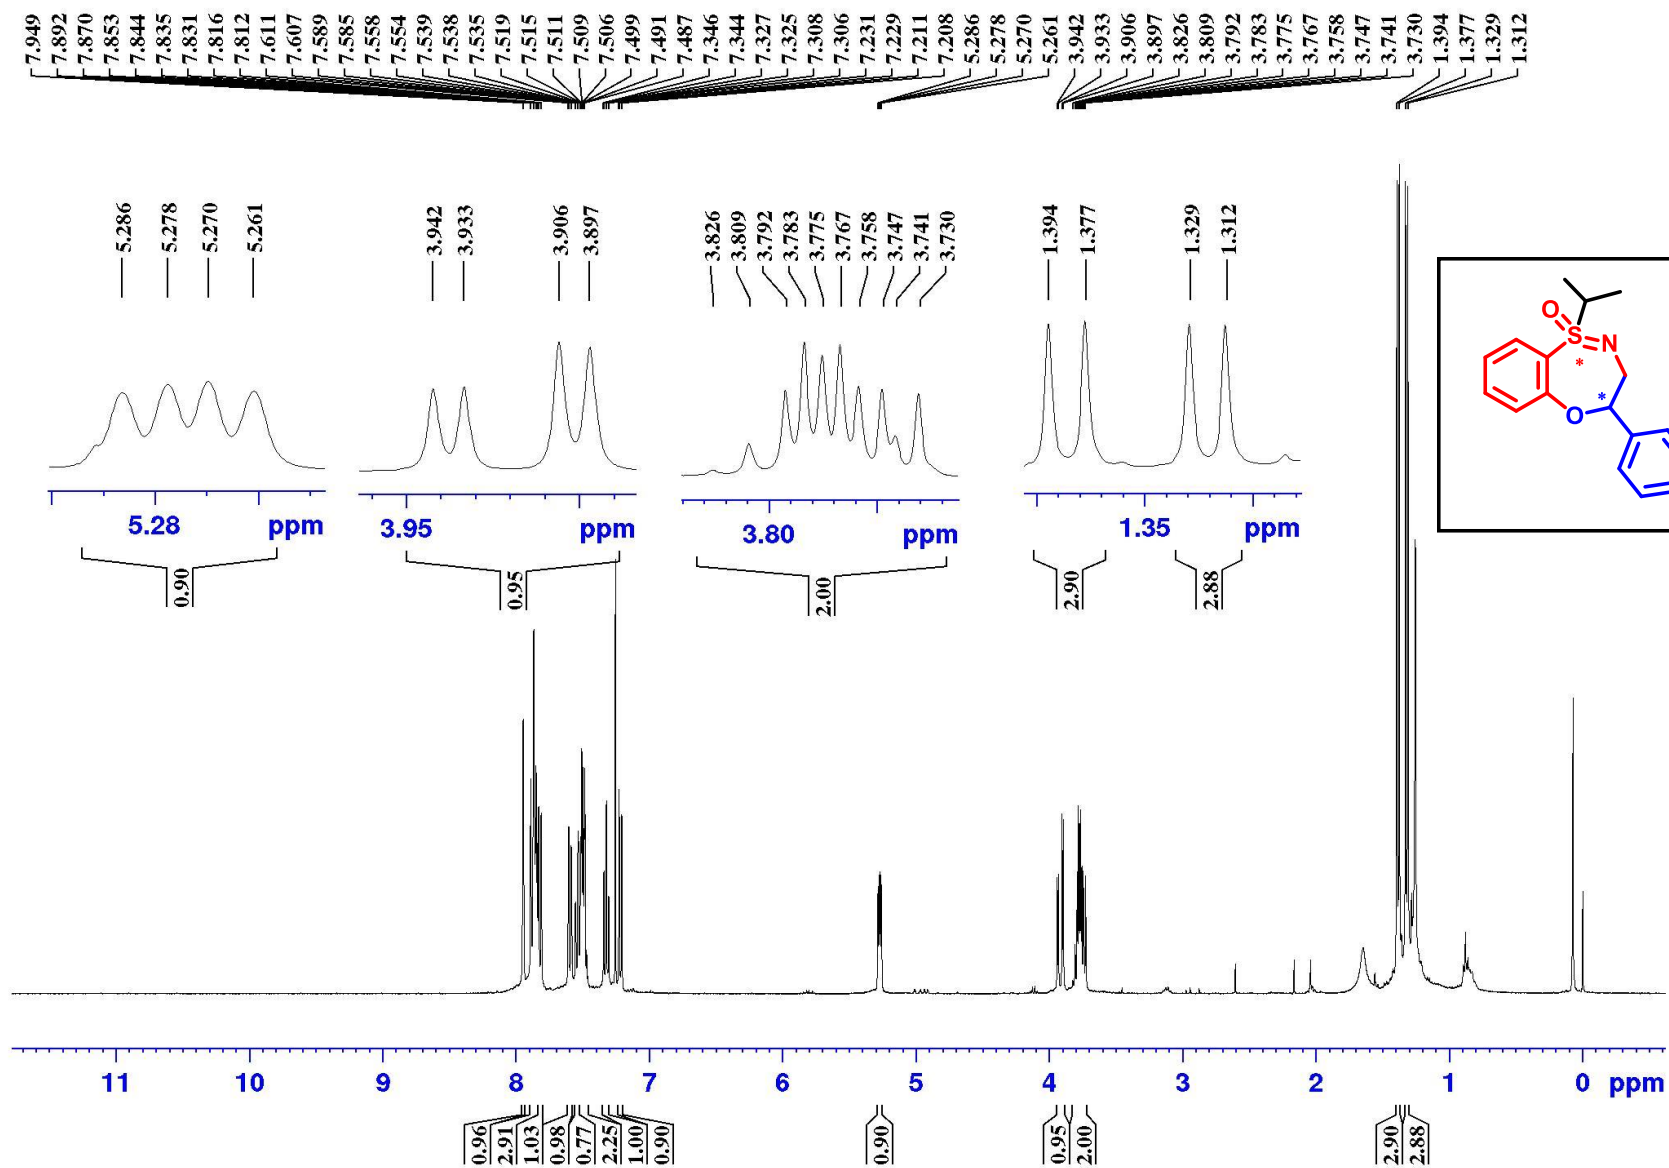

**Fig S-126:**  $^1\text{H}$  NMR Spectra of Compound **4t** (400 MHz,  $\text{CDCl}_3$ )

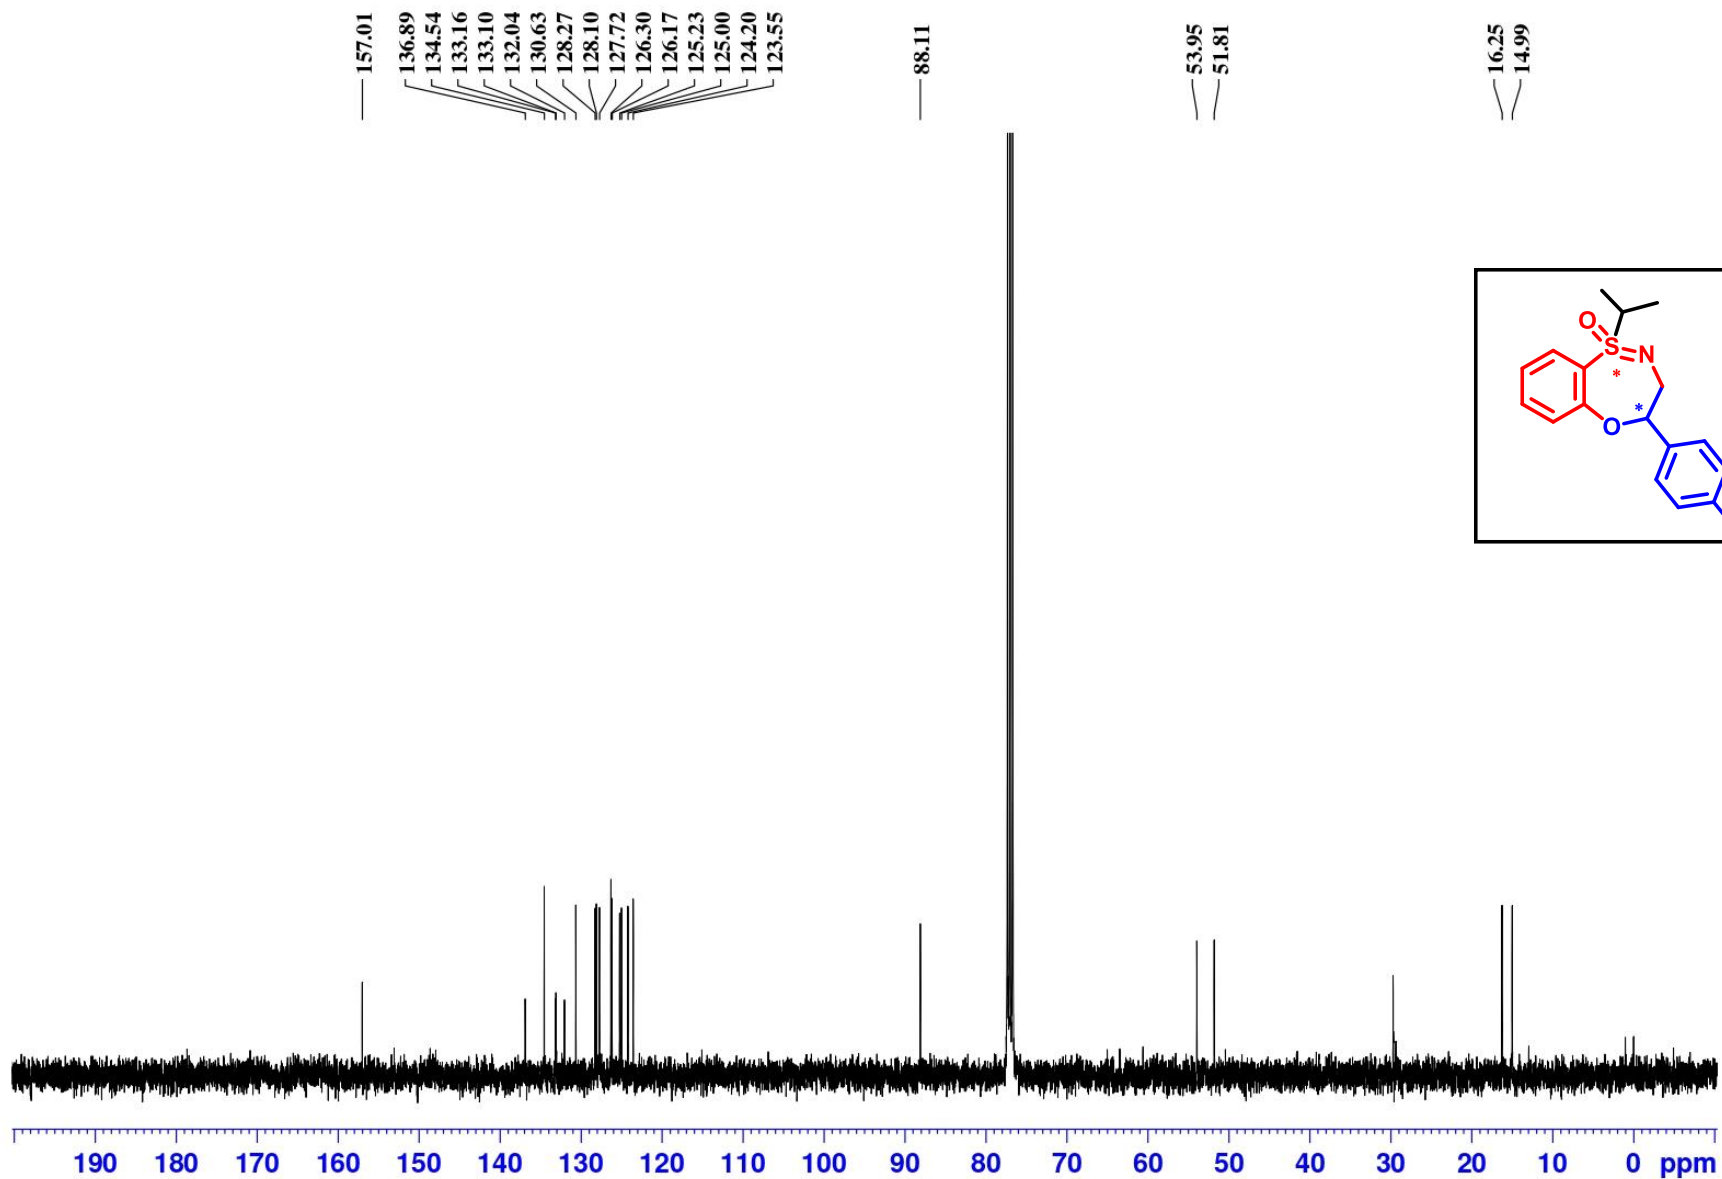

**Fig S-127:**  $^{13}\text{C}$  NMR Spectra of Compound **4t** (100 MHz,  $\text{CDCl}_3$ )

|               |                  |             |             |                 |              |                        |                     |
|---------------|------------------|-------------|-------------|-----------------|--------------|------------------------|---------------------|
| Sample Name   | 2i               | Position    | Vial 27     | Instrument Name | Instrument 1 | User Name              |                     |
| Inj Vol       | 1                | InjPosition |             | SampleType      | Sample       | IRM Calibration Status | Some Ions Missed    |
| Data Filename | HRMS22I02MAY27.d | ACQ Method  | ISOCRATIC.m | Comment         |              | Acquired Time          | 5/2/2022 1:54:55 PM |

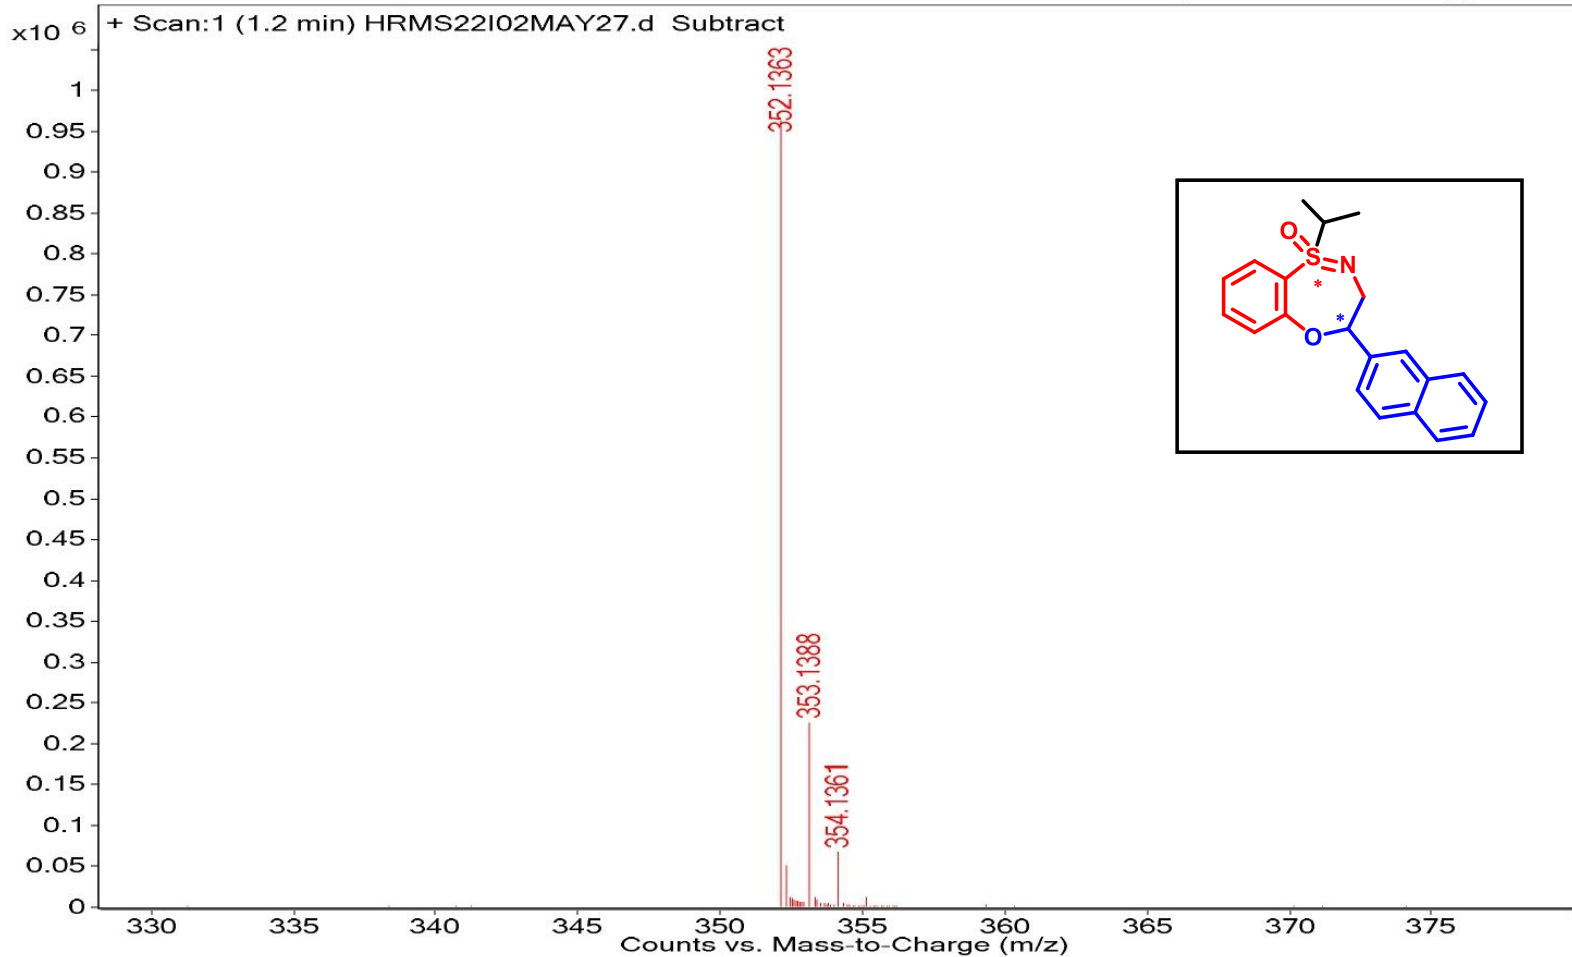

**Fig S-128:** HRMS report of Compound **4t**

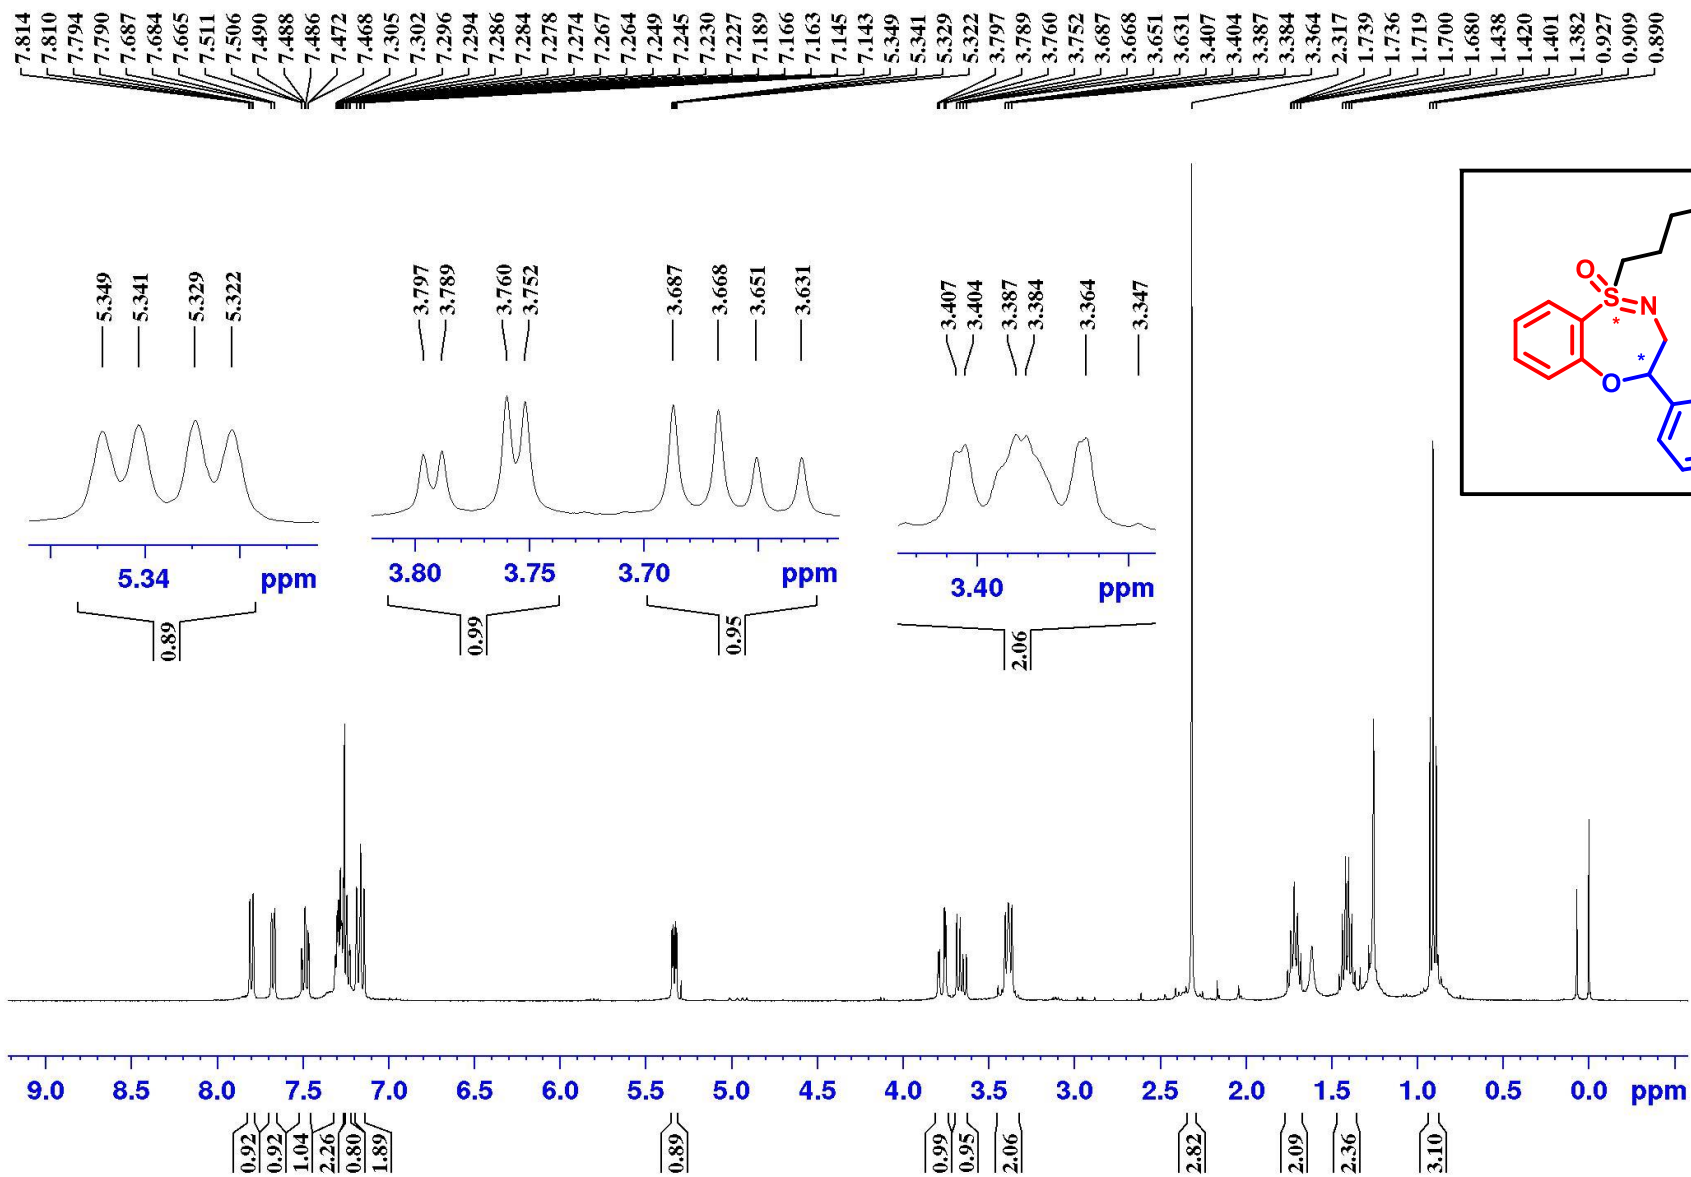

**Fig S-129: <sup>1</sup>H NMR Spectra of Compound 4u (400 MHz, CDCl<sub>3</sub>)**

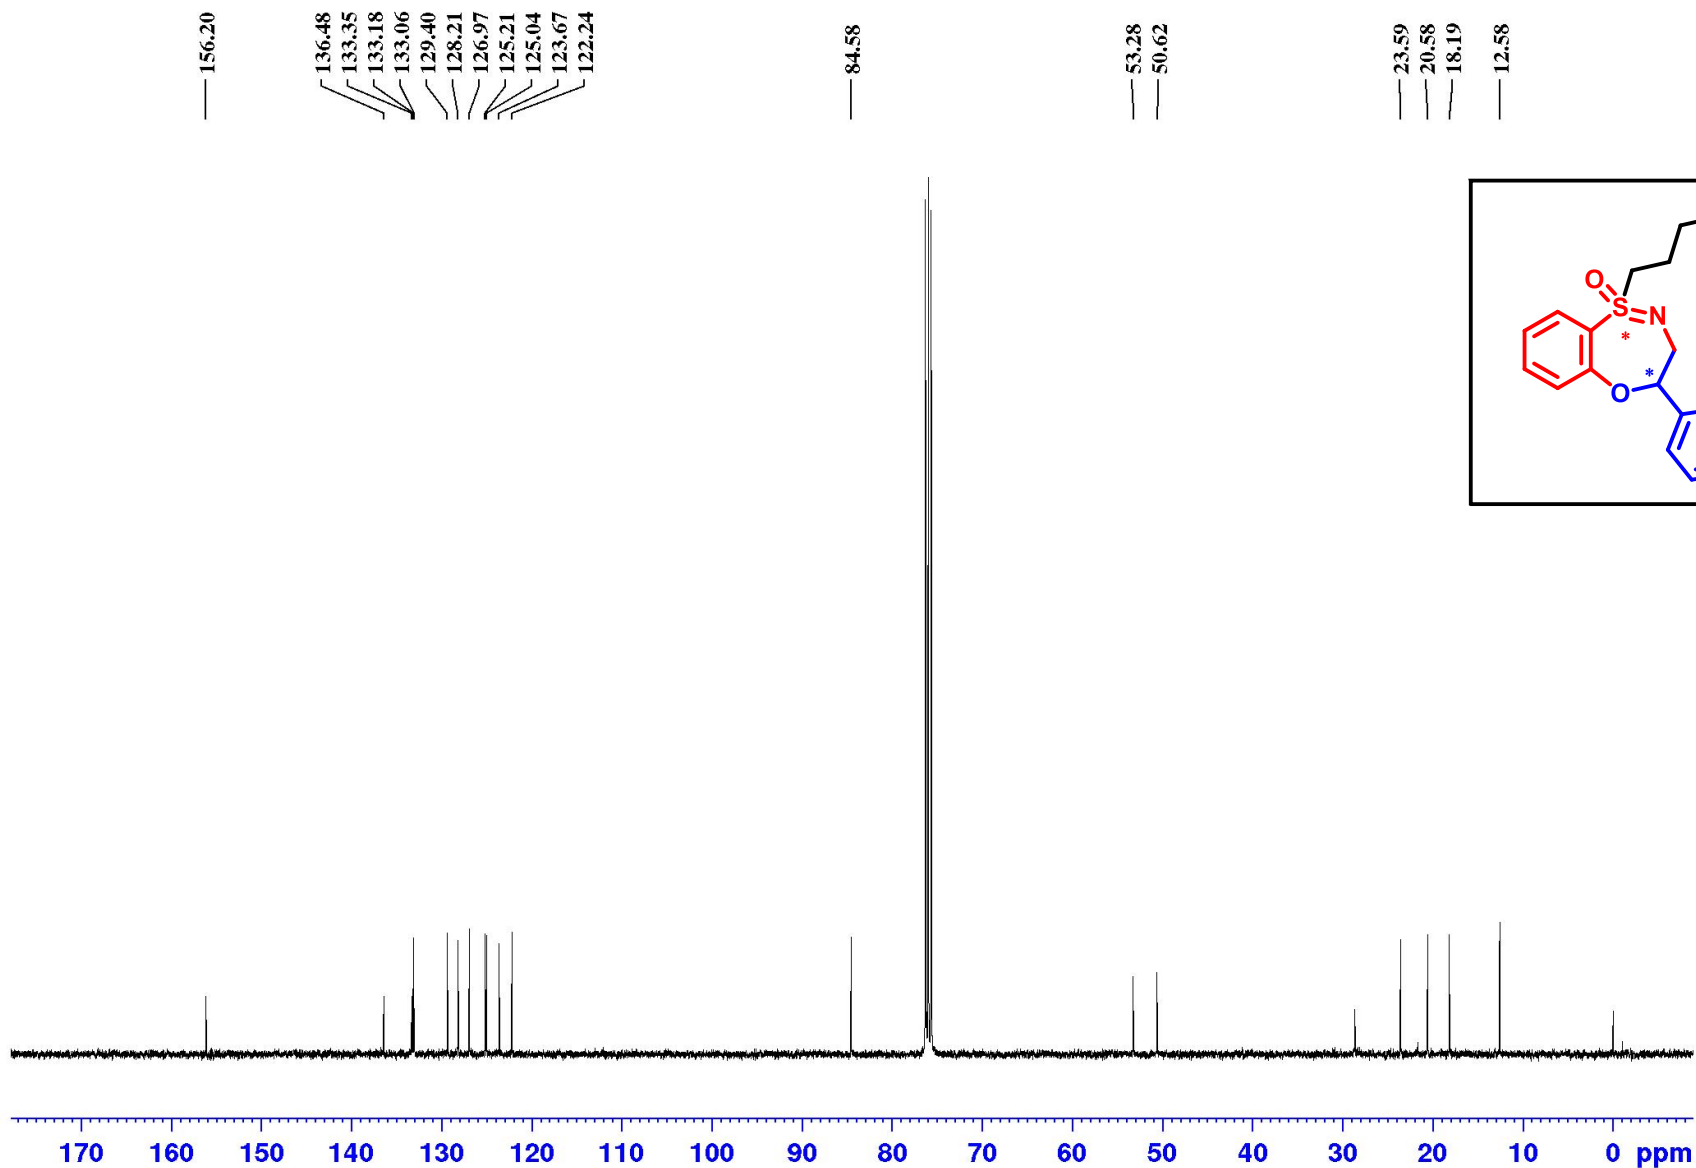

**Fig S-130:**  $^{13}\text{C}$  NMR Spectra of Compound **4u** (125 MHz,  $\text{CDCl}_3$ )

|               |                  |             |             |                 |              |                        |                      |
|---------------|------------------|-------------|-------------|-----------------|--------------|------------------------|----------------------|
| Sample Name   | asa1391p         | Position    | Vial 25     | Instrument Name | Instrument 1 | User Name              |                      |
| Inj Vol       | 1                | InjPosition |             | SampleType      | Sample       | IRM Calibration Status | Some Ions Missed     |
| Data Filename | HRMS22I29APR25.d | ACQ Method  | ISOCRATIC.m | Comment         |              | Acquired Time          | 4/29/2022 1:45:03 PM |

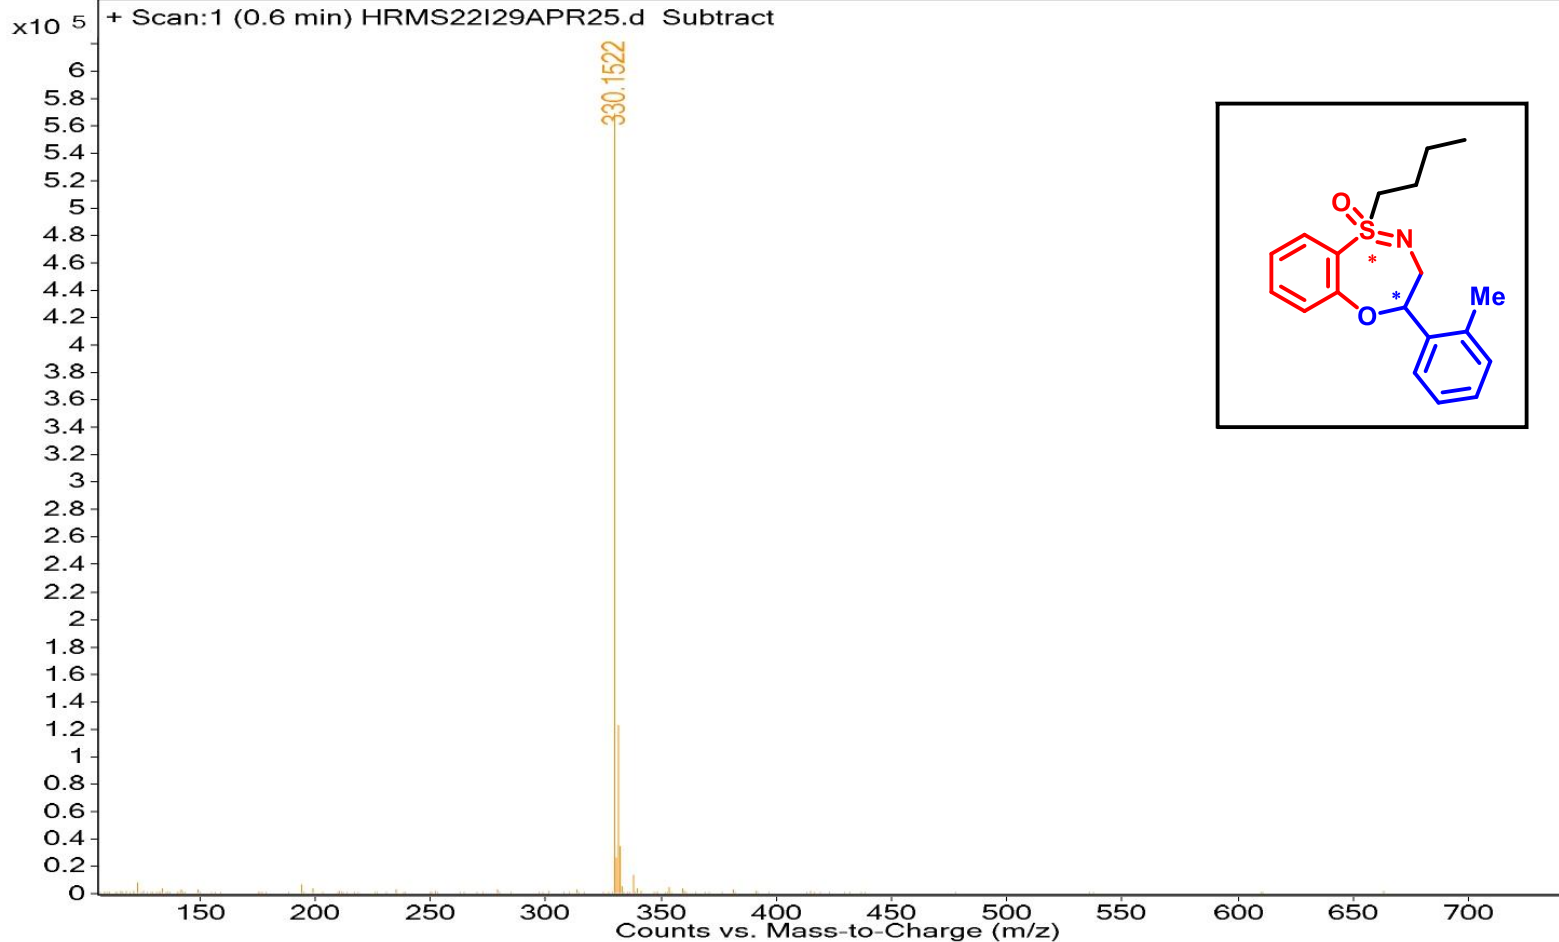

**Fig S-131:** HRMS report of Compound **4u**



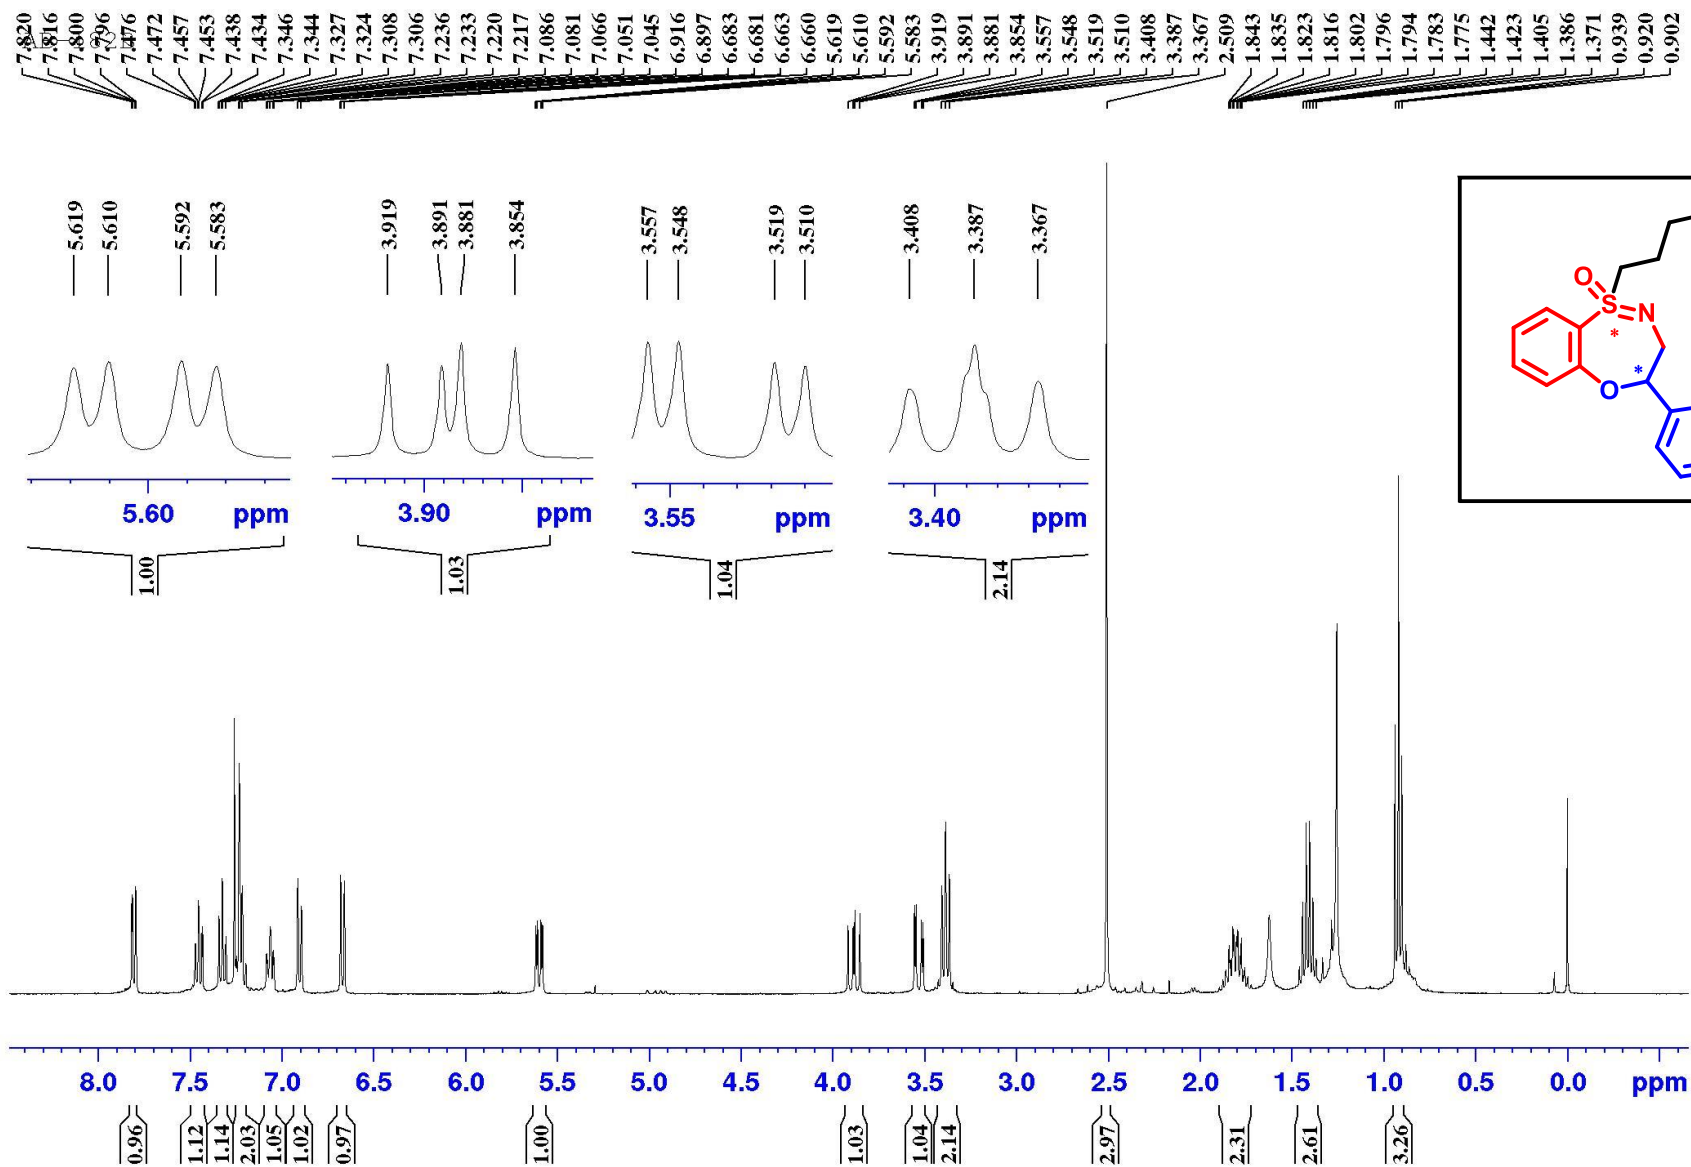

Fig S-132: <sup>1</sup>H NMR Spectra of Compound 4u' (400 MHz, CDCl<sub>3</sub>)

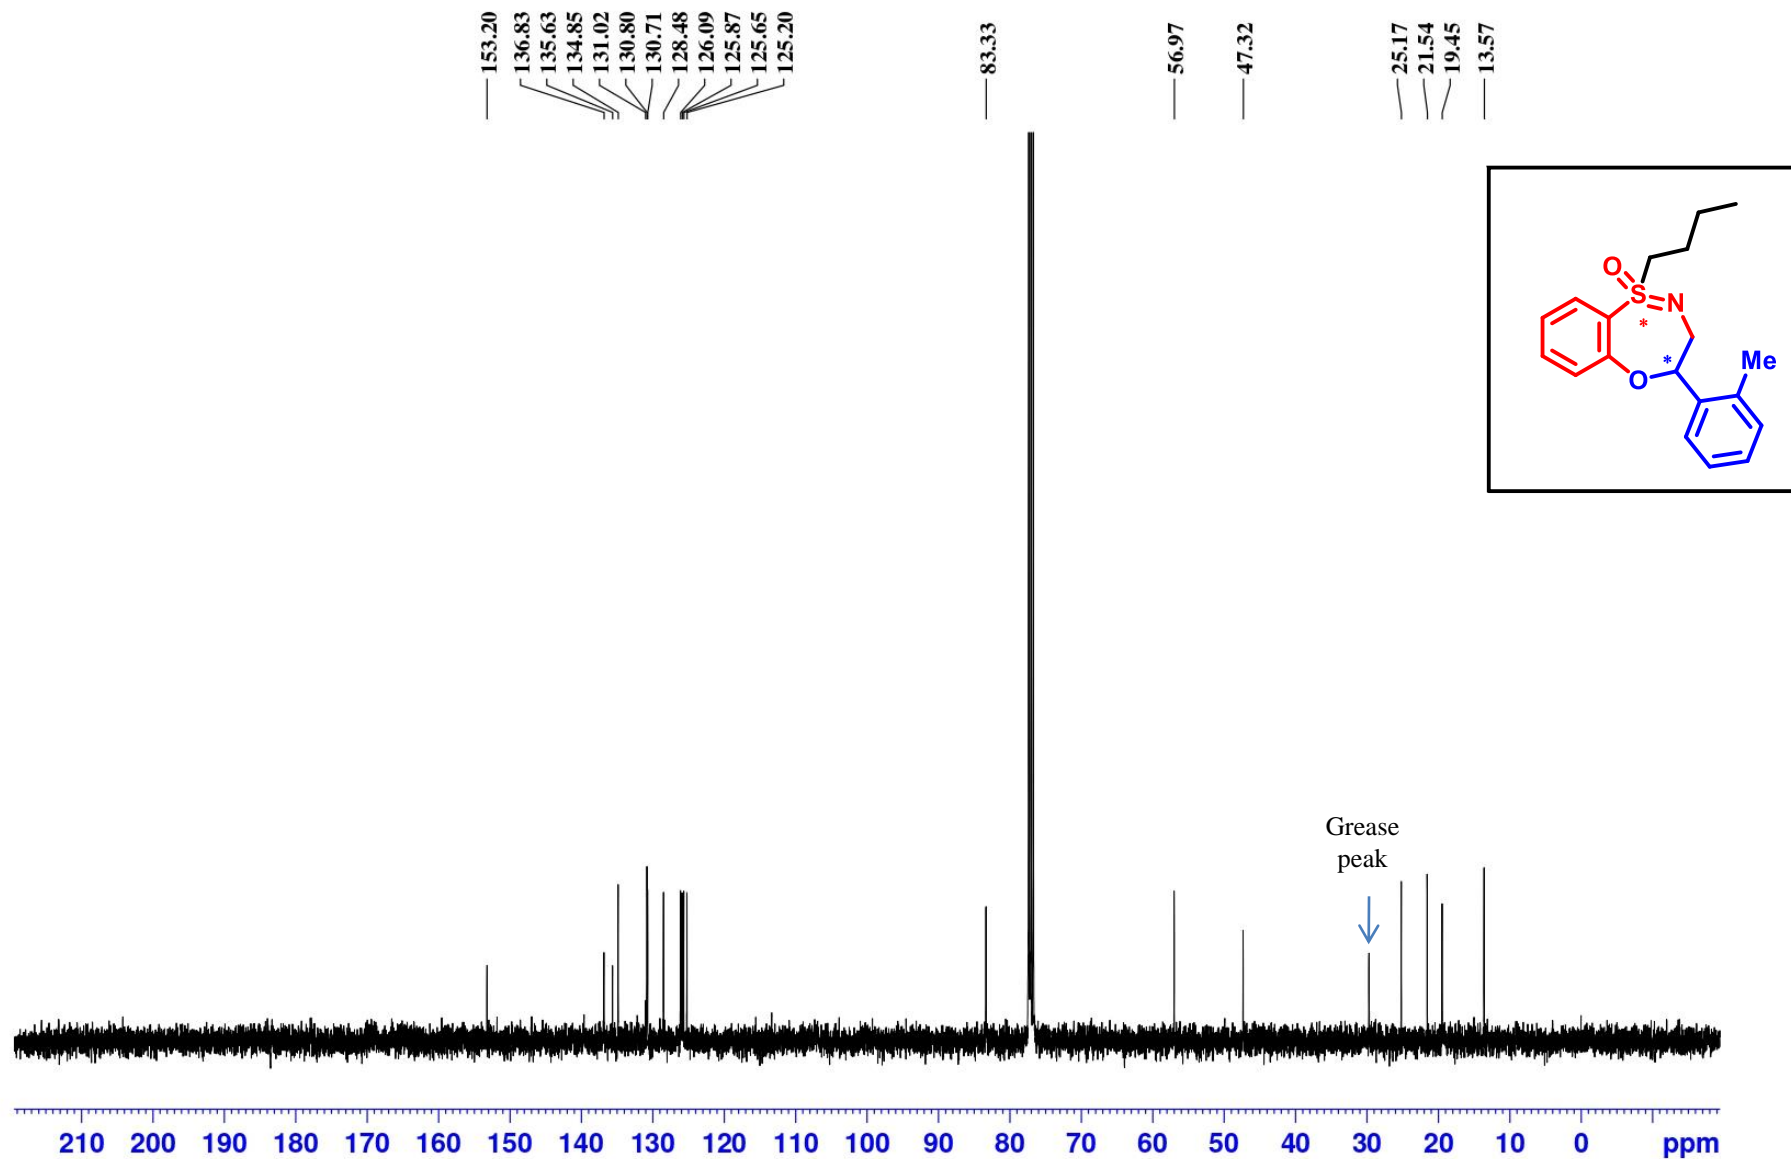

**Fig S-133:**  $^{13}\text{C}$  NMR Spectra of Compound 4u' (100 MHz,  $\text{CDCl}_3$ )

|               |                  |             |             |                 |              |                        |                      |
|---------------|------------------|-------------|-------------|-----------------|--------------|------------------------|----------------------|
| Sample Name   | asa1391p         | Position    | Vial 25     | Instrument Name | Instrument 1 | User Name              |                      |
| Inj Vol       | 1                | InjPosition |             | SampleType      | Sample       | IRM Calibration Status | Some Ions Missed     |
| Data Filename | HRMS22I29APR25.d | ACQ Method  | ISOCRATIC.m | Comment         |              | Acquired Time          | 4/29/2022 1:45:03 PM |

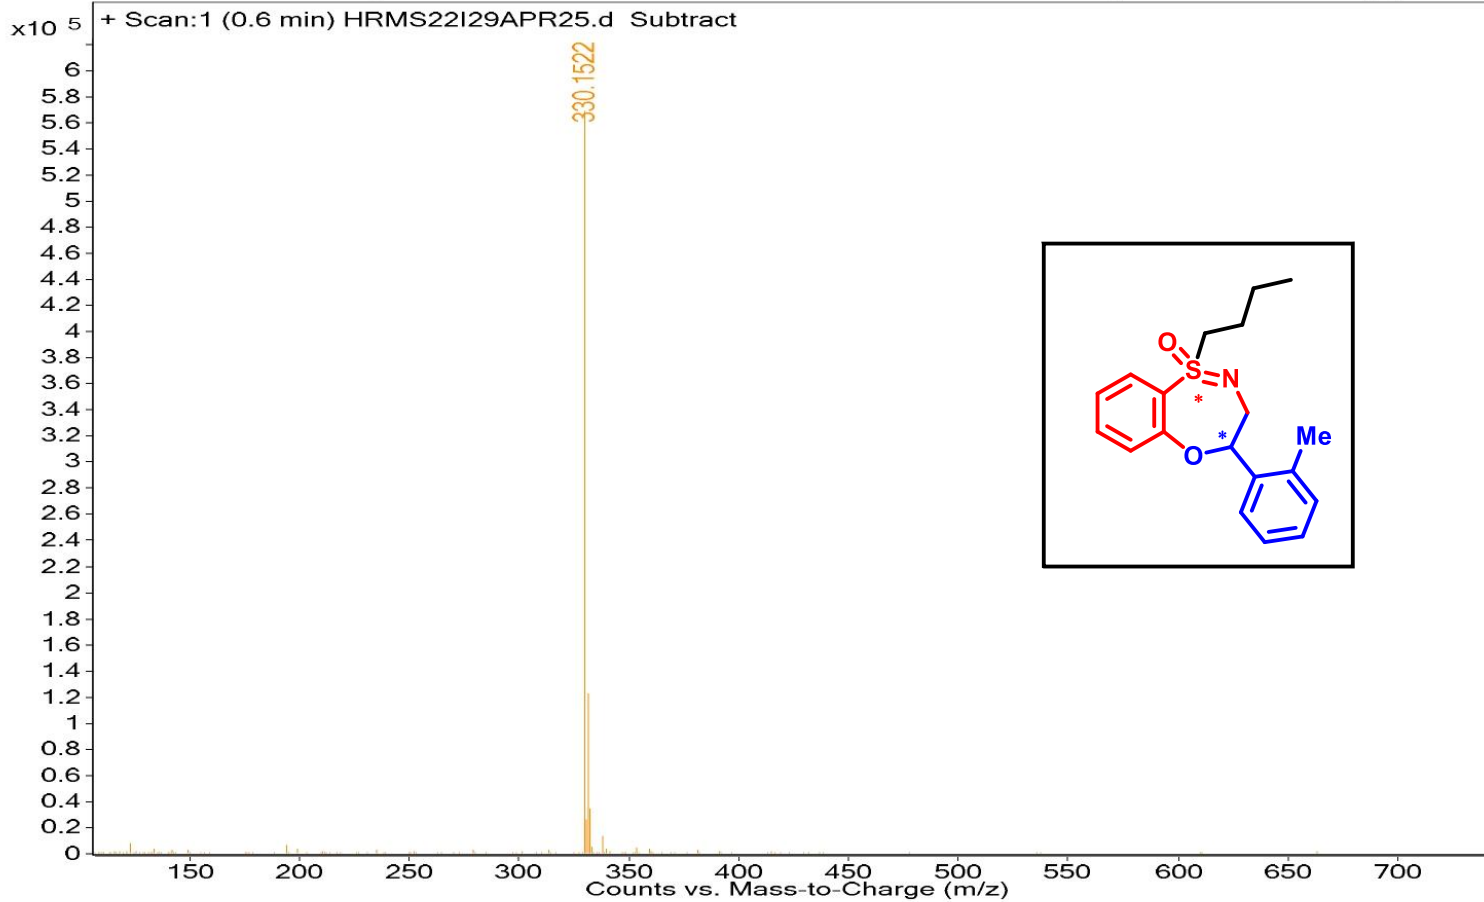

**Fig S-134:** HRMS report of Compound **4u'**

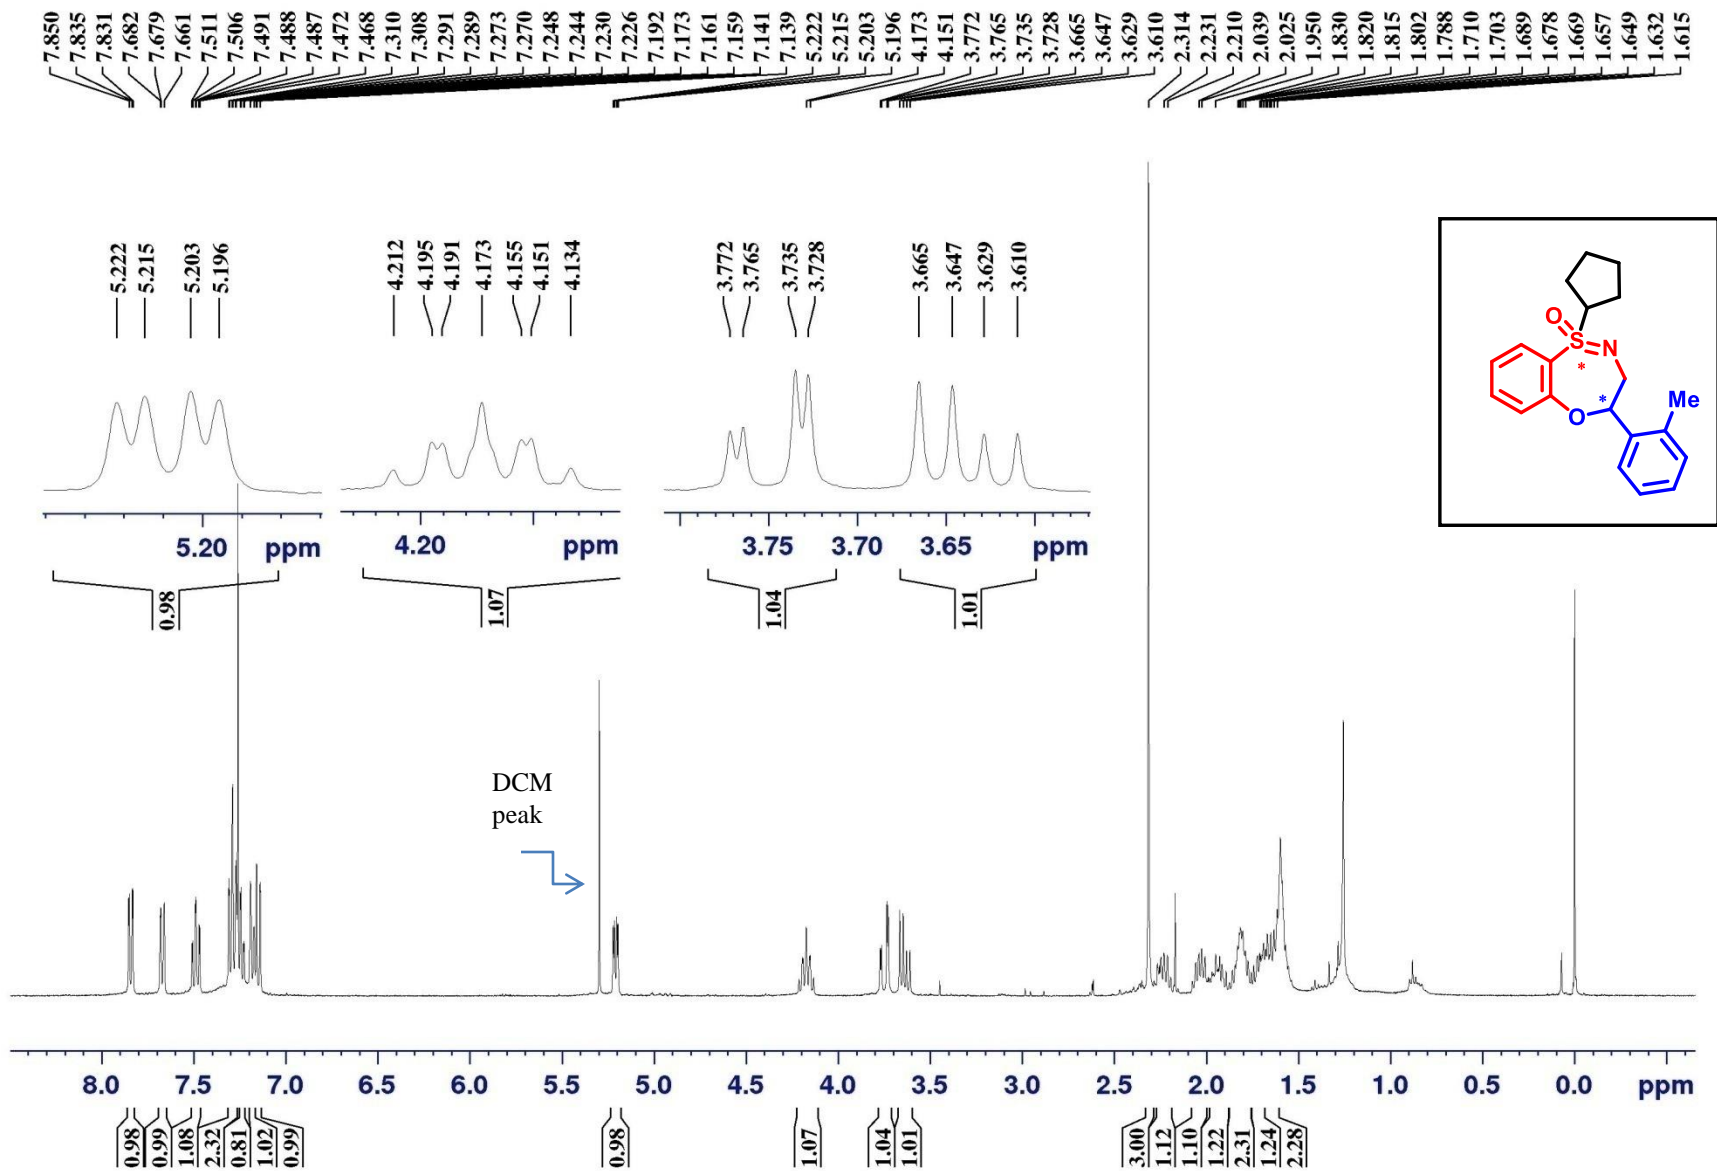

**Fig S-135:**  $^1\text{H}$  NMR Spectra of Compound 4v (400 MHz,  $\text{CDCl}_3$ )

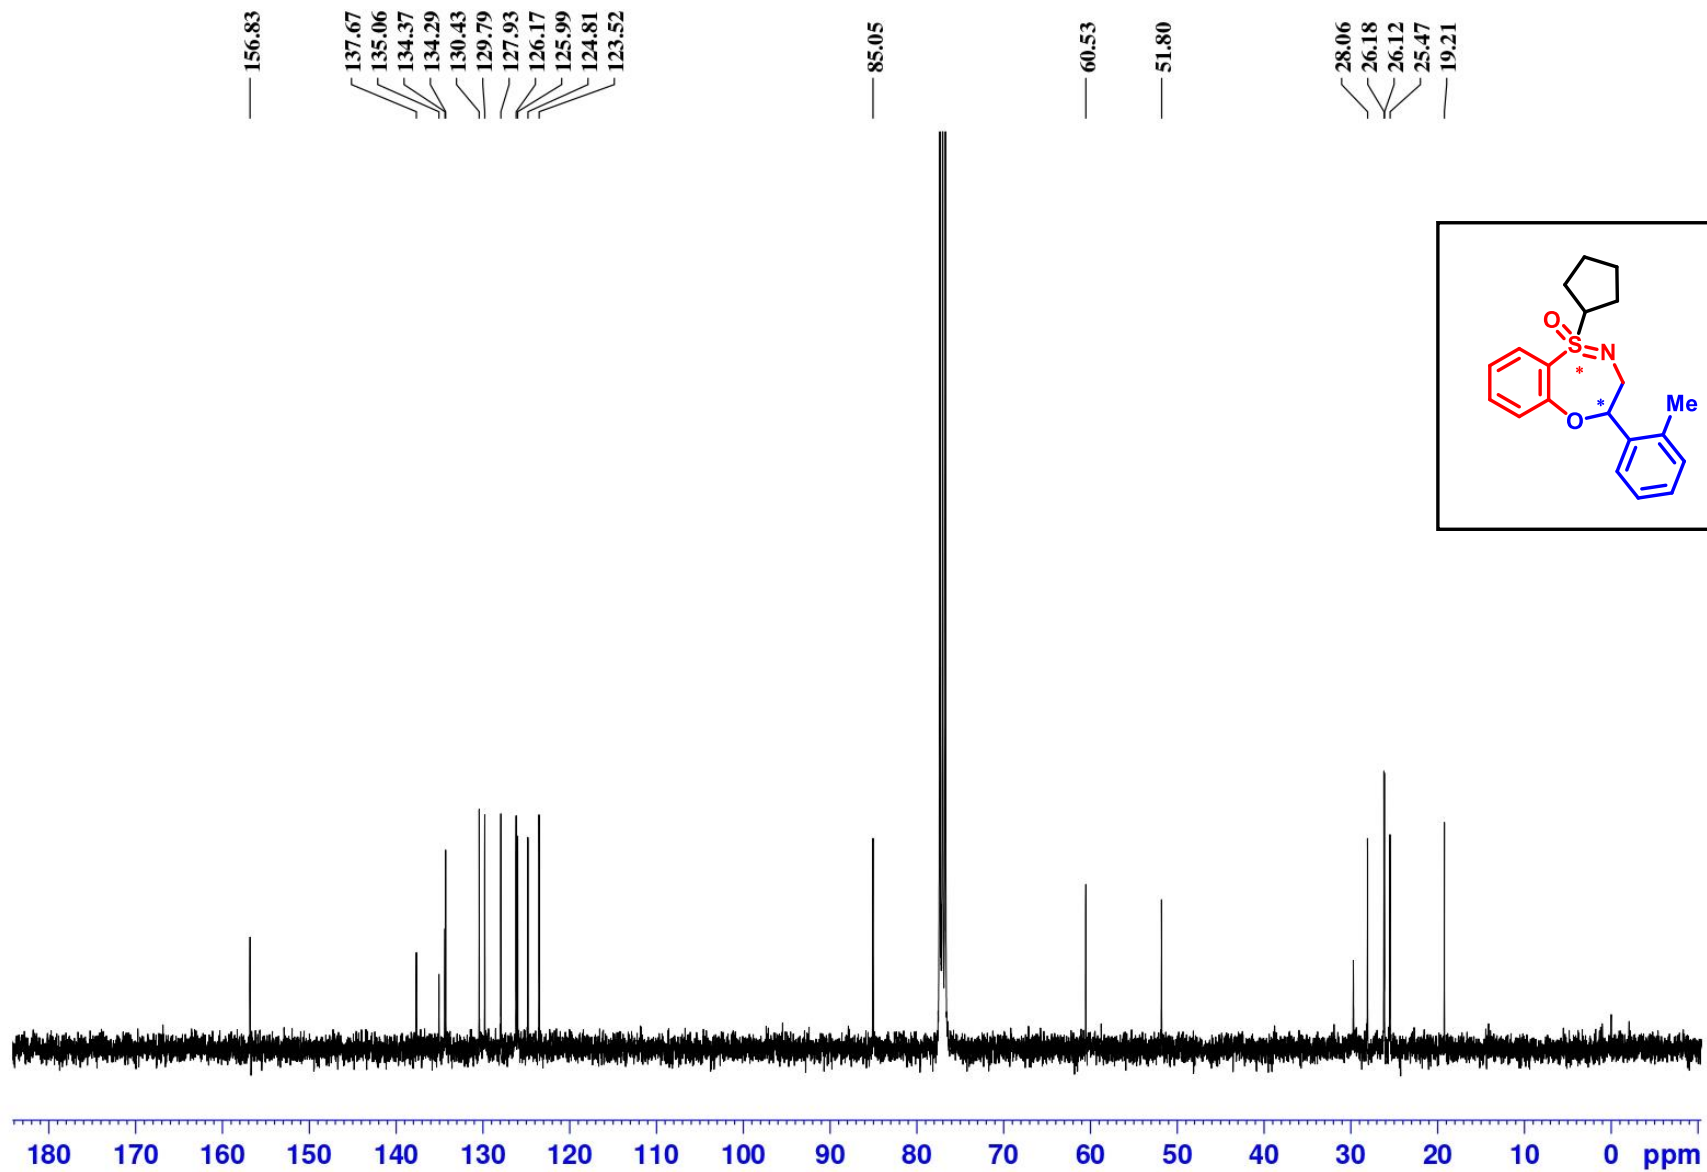

**Fig S-136:**  $^{13}\text{C}$  NMR Spectra of Compound 4v (100 MHz,  $\text{CDCl}_3$ )

## Qualitative Compound Report

|                        |                    |               |                     |
|------------------------|--------------------|---------------|---------------------|
| Data File              | AD-AR-183.d        | Sample Name   | AD-AR-183           |
| Sample Type            | Sample             | Position      | Vial 13             |
| Instrument Name        | Instrument 1       | User Name     |                     |
| Acq Method             | Direct Mass-2017.m | Acquired Time | 08-09-2021 16:00:53 |
| IRN Calibration Status | Some Ions Missed   | DA Method     | Default.m           |

|                |                             |       |
|----------------|-----------------------------|-------|
| Sample Group   |                             | Info. |
| Acquisition SW | 6200 series TOF/6500 series |       |
| Version        | Q.TOF B.05.00 (B5042.0)     |       |

### Compound Table

| Compound Label        | RT    | Mass     | Abund | Formula        | Tgt Mass | Diff (ppm) | MFG Formula    | DB Formula     |
|-----------------------|-------|----------|-------|----------------|----------|------------|----------------|----------------|
| Cpd 1: C20 H23 N O2 S | 0.211 | 341.1427 | 24978 | C20 H23 N O2 S | 341.1449 | -6.61      | C20 H23 N O2 S | C20 H23 N O2 S |

| Compound Label        | m/z      | RT    | Algorithm       | Mass     |
|-----------------------|----------|-------|-----------------|----------|
| Cpd 1: C20 H23 N O2 S | 342.1501 | 0.211 | Find By Formula | 341.1427 |

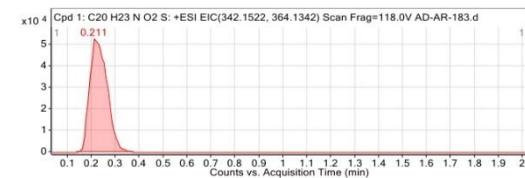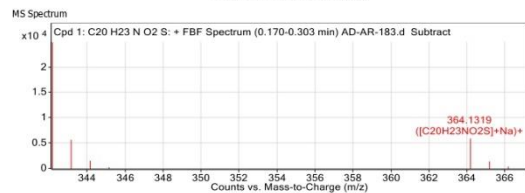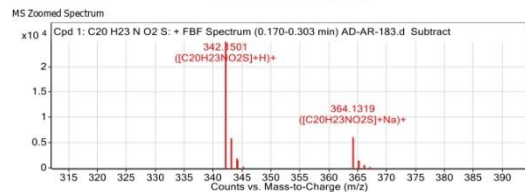

### MS Spectrum Peak List

| m/z      | z | Abund    | Formula    | Ion     |
|----------|---|----------|------------|---------|
| 342.1501 | 1 | 24977.58 | C20H23NO2S | (M+H)+  |
| 343.1535 | 1 | 5810.22  | C20H23NO2S | (M+H)+  |
| 344.149  | 1 | 1703.95  | C20H23NO2S | (M+H)+  |
| 345.1499 | 1 | 410.64   | C20H23NO2S | (M+H)+  |
| 364.1319 | 1 | 6076.95  | C20H23NO2S | (M+Na)+ |
| 365.1342 | 1 | 1521.42  | C20H23NO2S | (M+Na)+ |
| 366.1299 | 1 | 484.23   | C20H23NO2S | (M+Na)+ |
| 367.1281 | 1 | 67.92    | C20H23NO2S | (M+Na)+ |

--- End Of Report ---

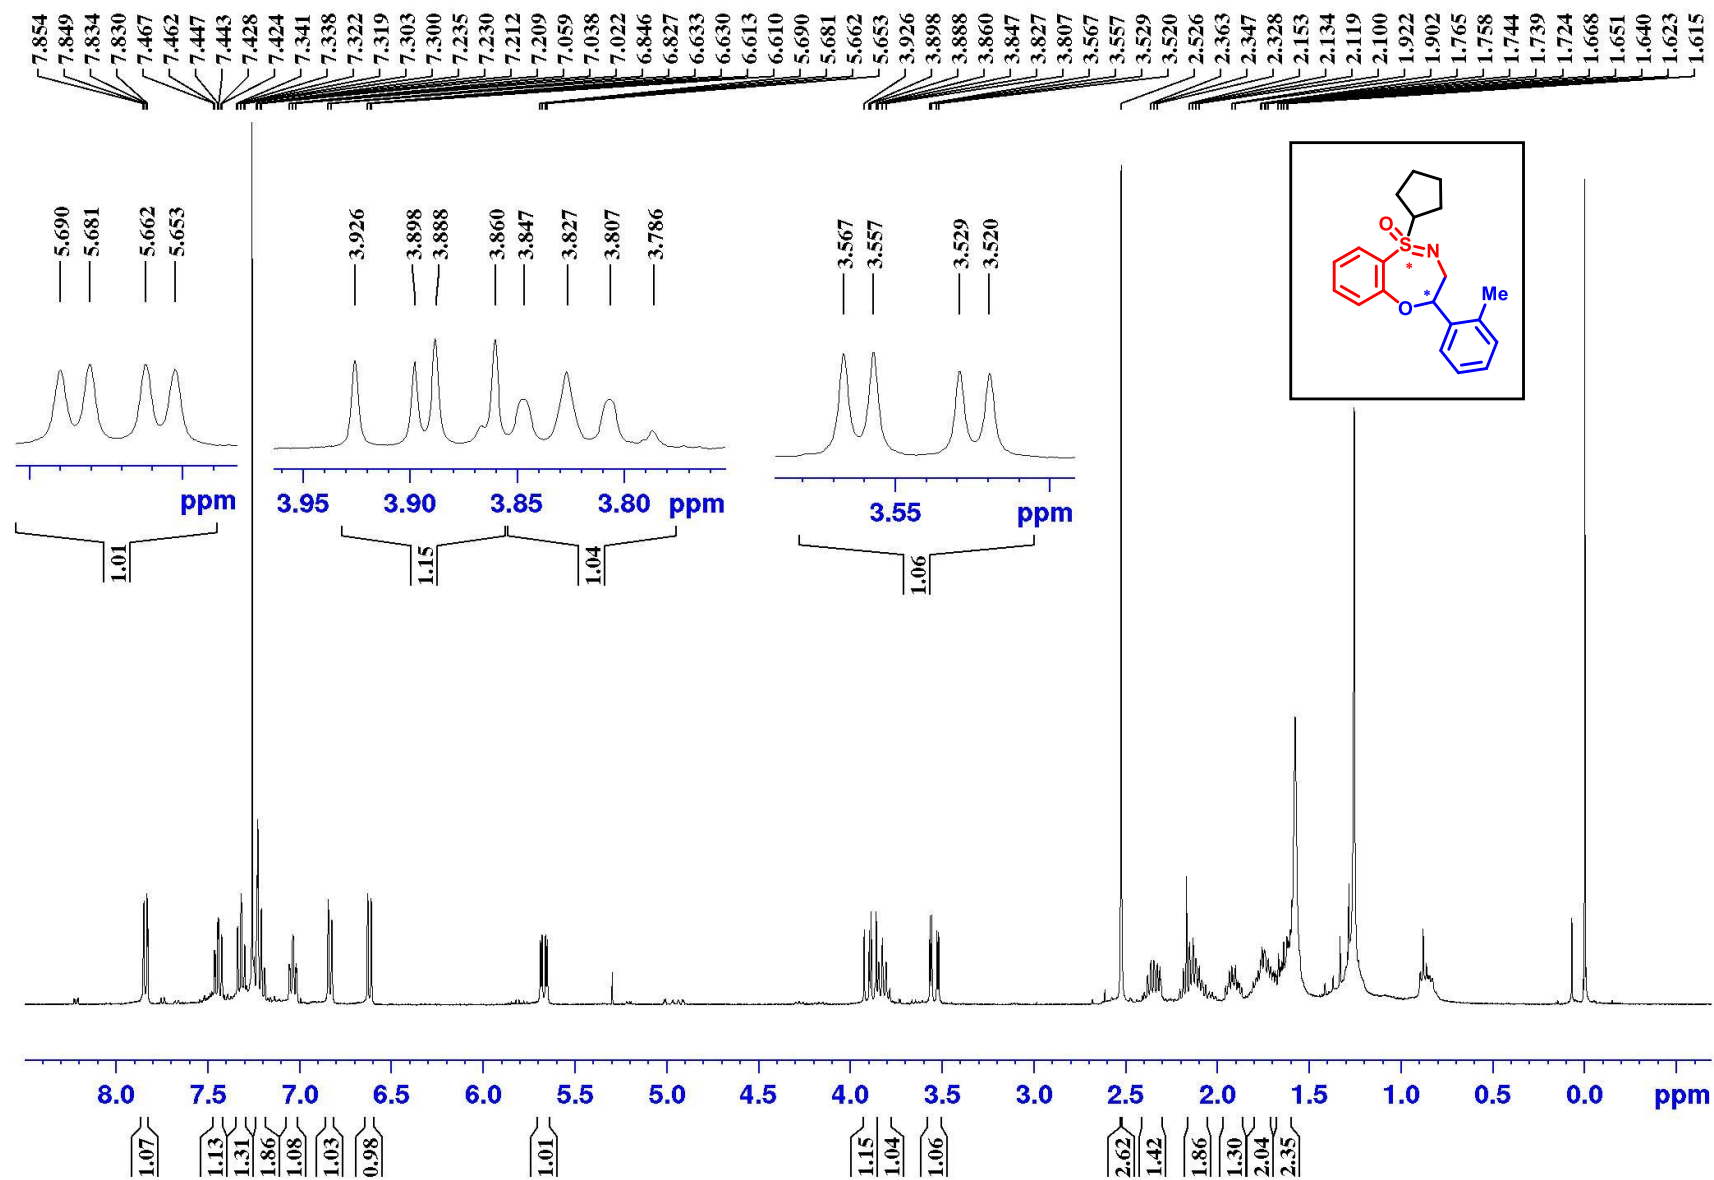

**Fig S-138:  $^1\text{H}$  NMR Spectra of Compound **4v'** (400 MHz,  $\text{CDCl}_3$ )**

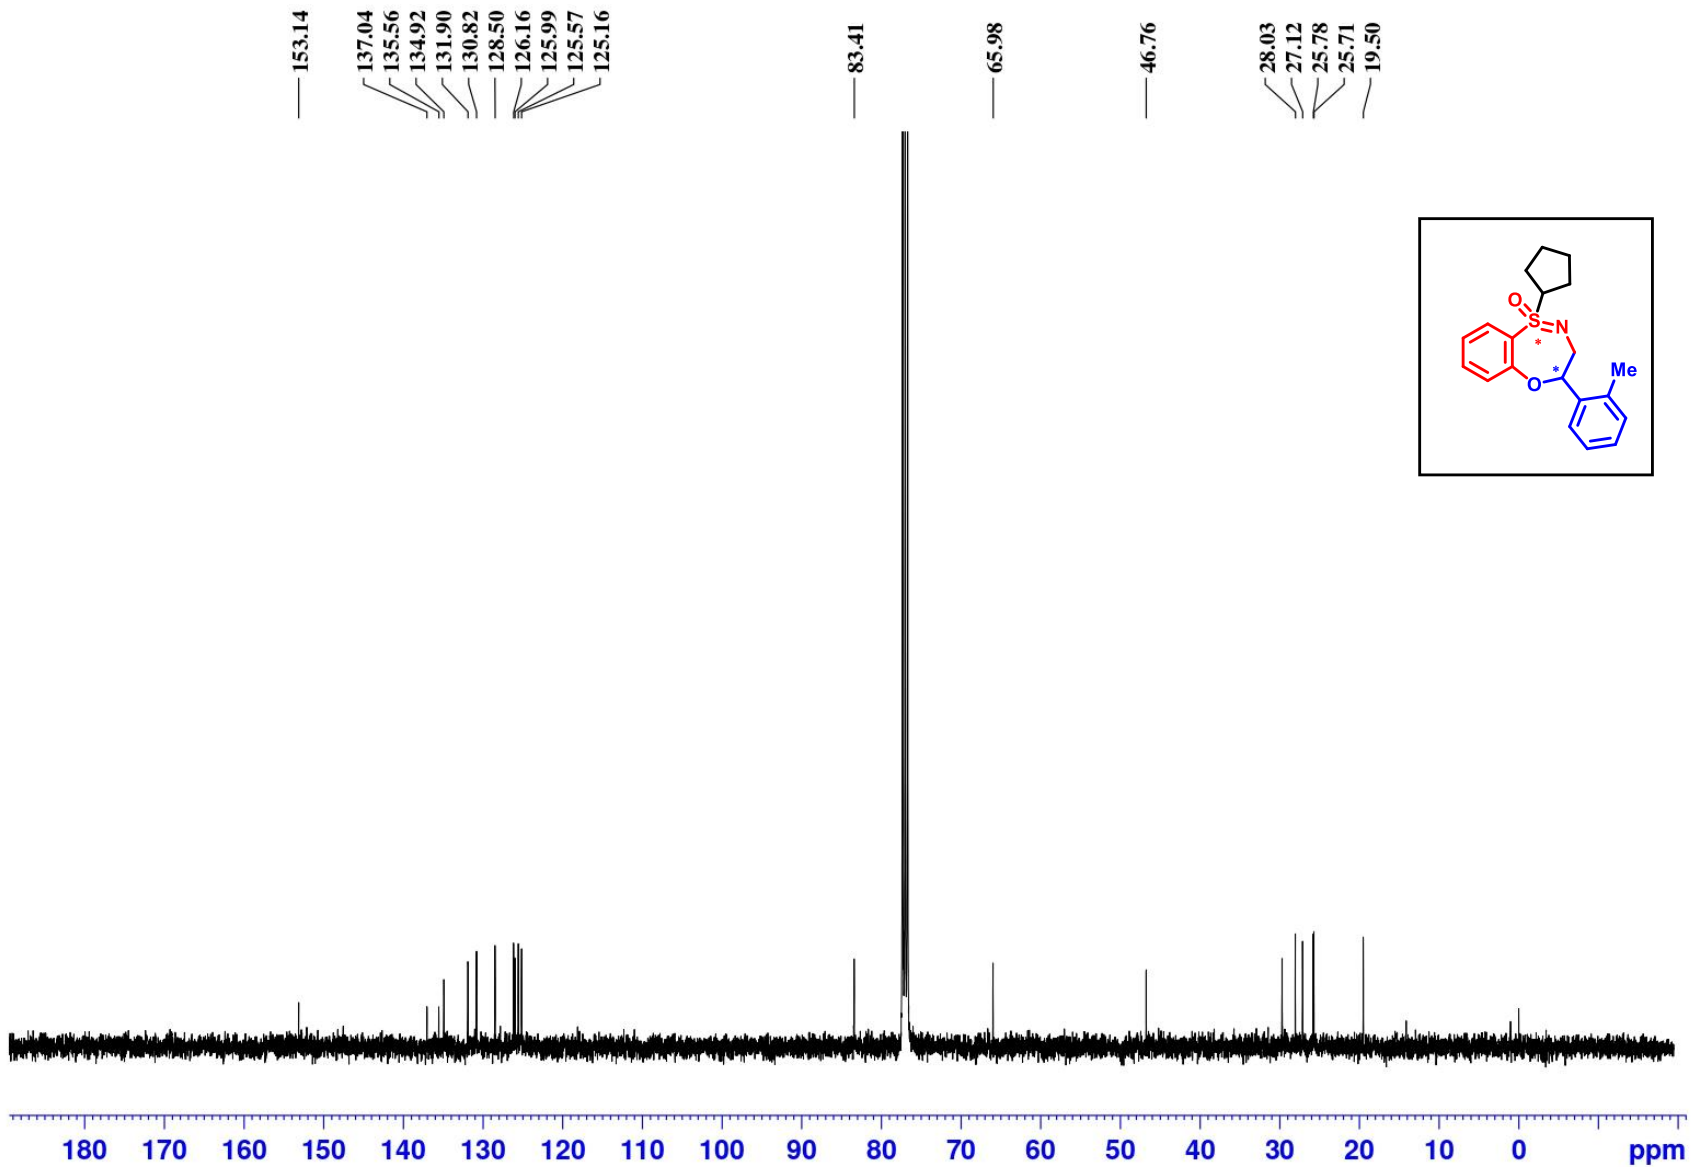

**Fig S-139:**  $^{13}\text{C}$  NMR Spectra of Compound **4v'** (100 MHz,  $\text{CDCl}_3$ )



|               |                  |             |             |                 |              |                        |                     |
|---------------|------------------|-------------|-------------|-----------------|--------------|------------------------|---------------------|
| Sample Name   | 4v'              | Position    | Vial 36     | Instrument Name | Instrument 1 | User Name              |                     |
| Inj Vol       | 1                | InjPosition |             | SampleType      | Sample       | IRM Calibration Status | Some Ions Missed    |
| Data Filename | HRMS22I02AUG35.d | ACQ Method  | ISOCRATIC.m | Comment         |              | Acquired Time          | 8/2/2022 1:34:21 PM |

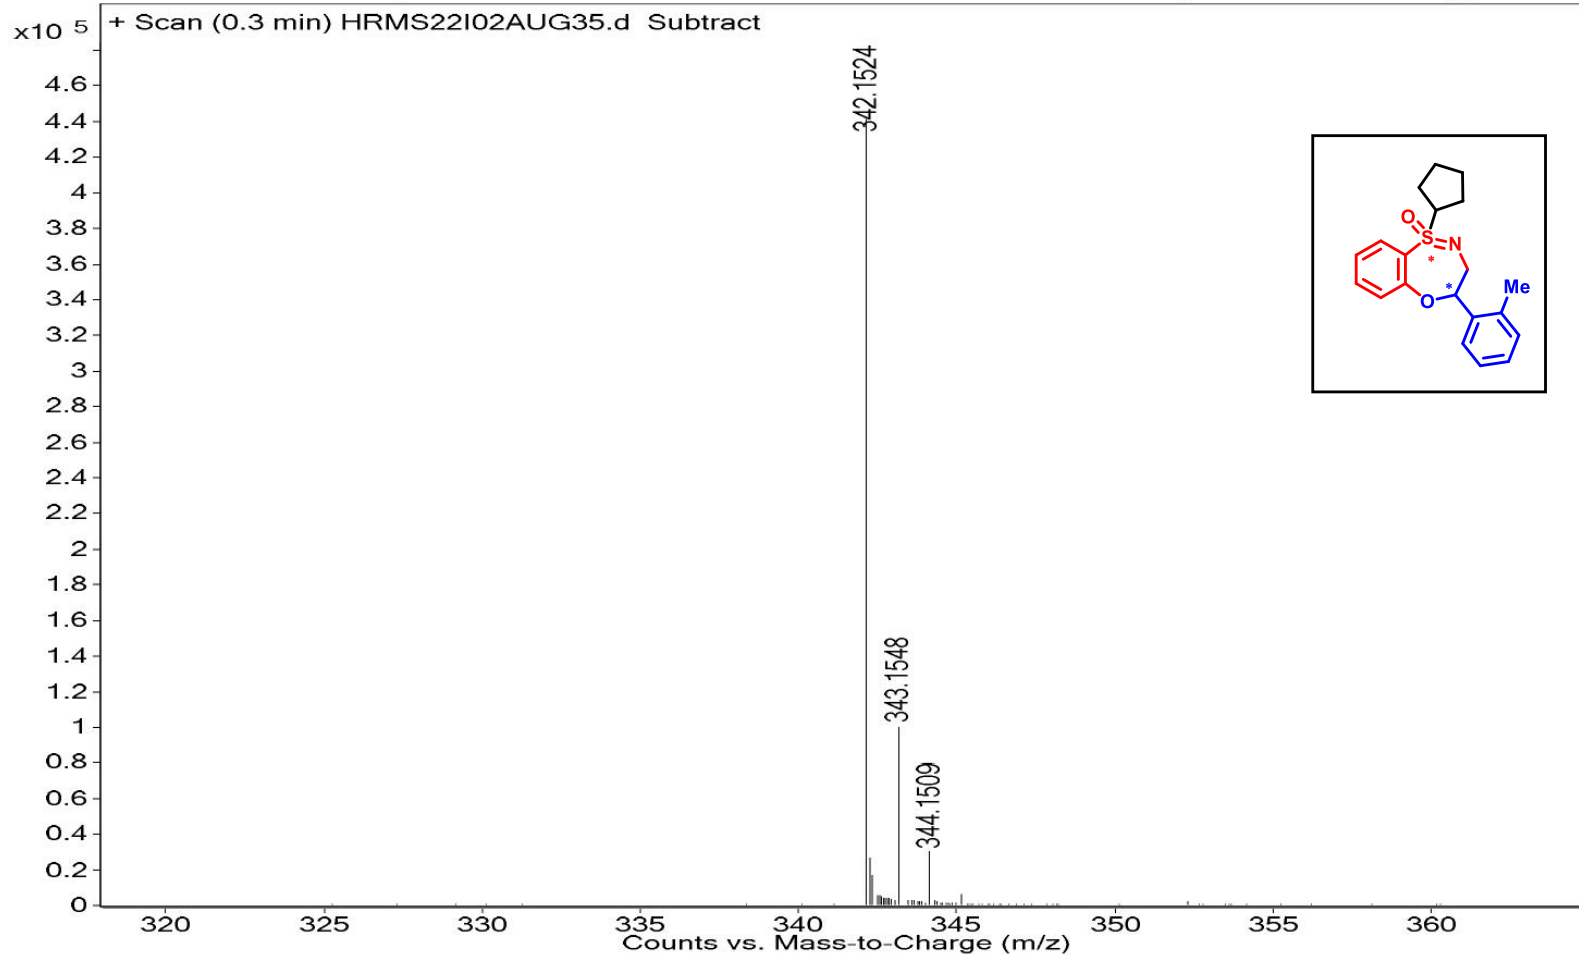

Fig S-140: HRMS report of Compound 4v'

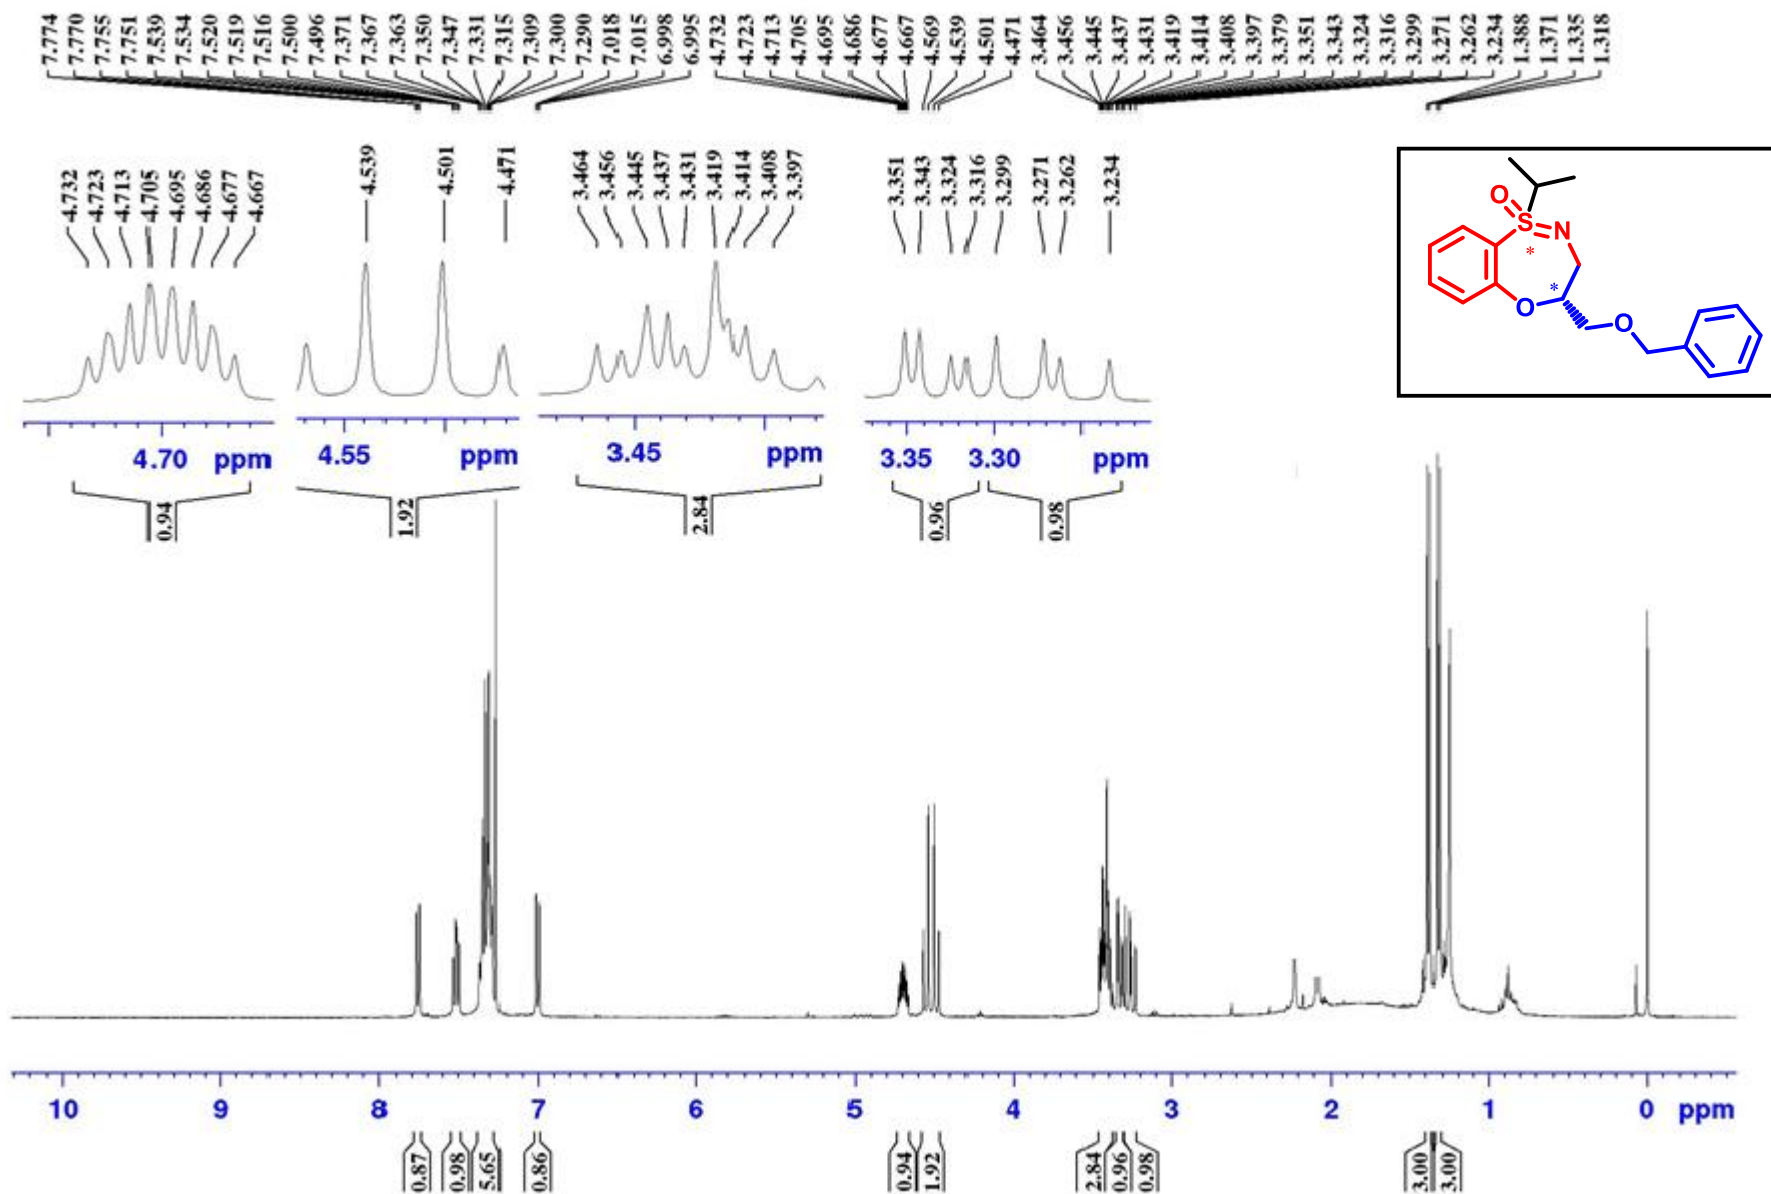

**Fig S-141:** <sup>1</sup>H NMR Spectra of Compound 4w (400 MHz, CDCl<sub>3</sub>)

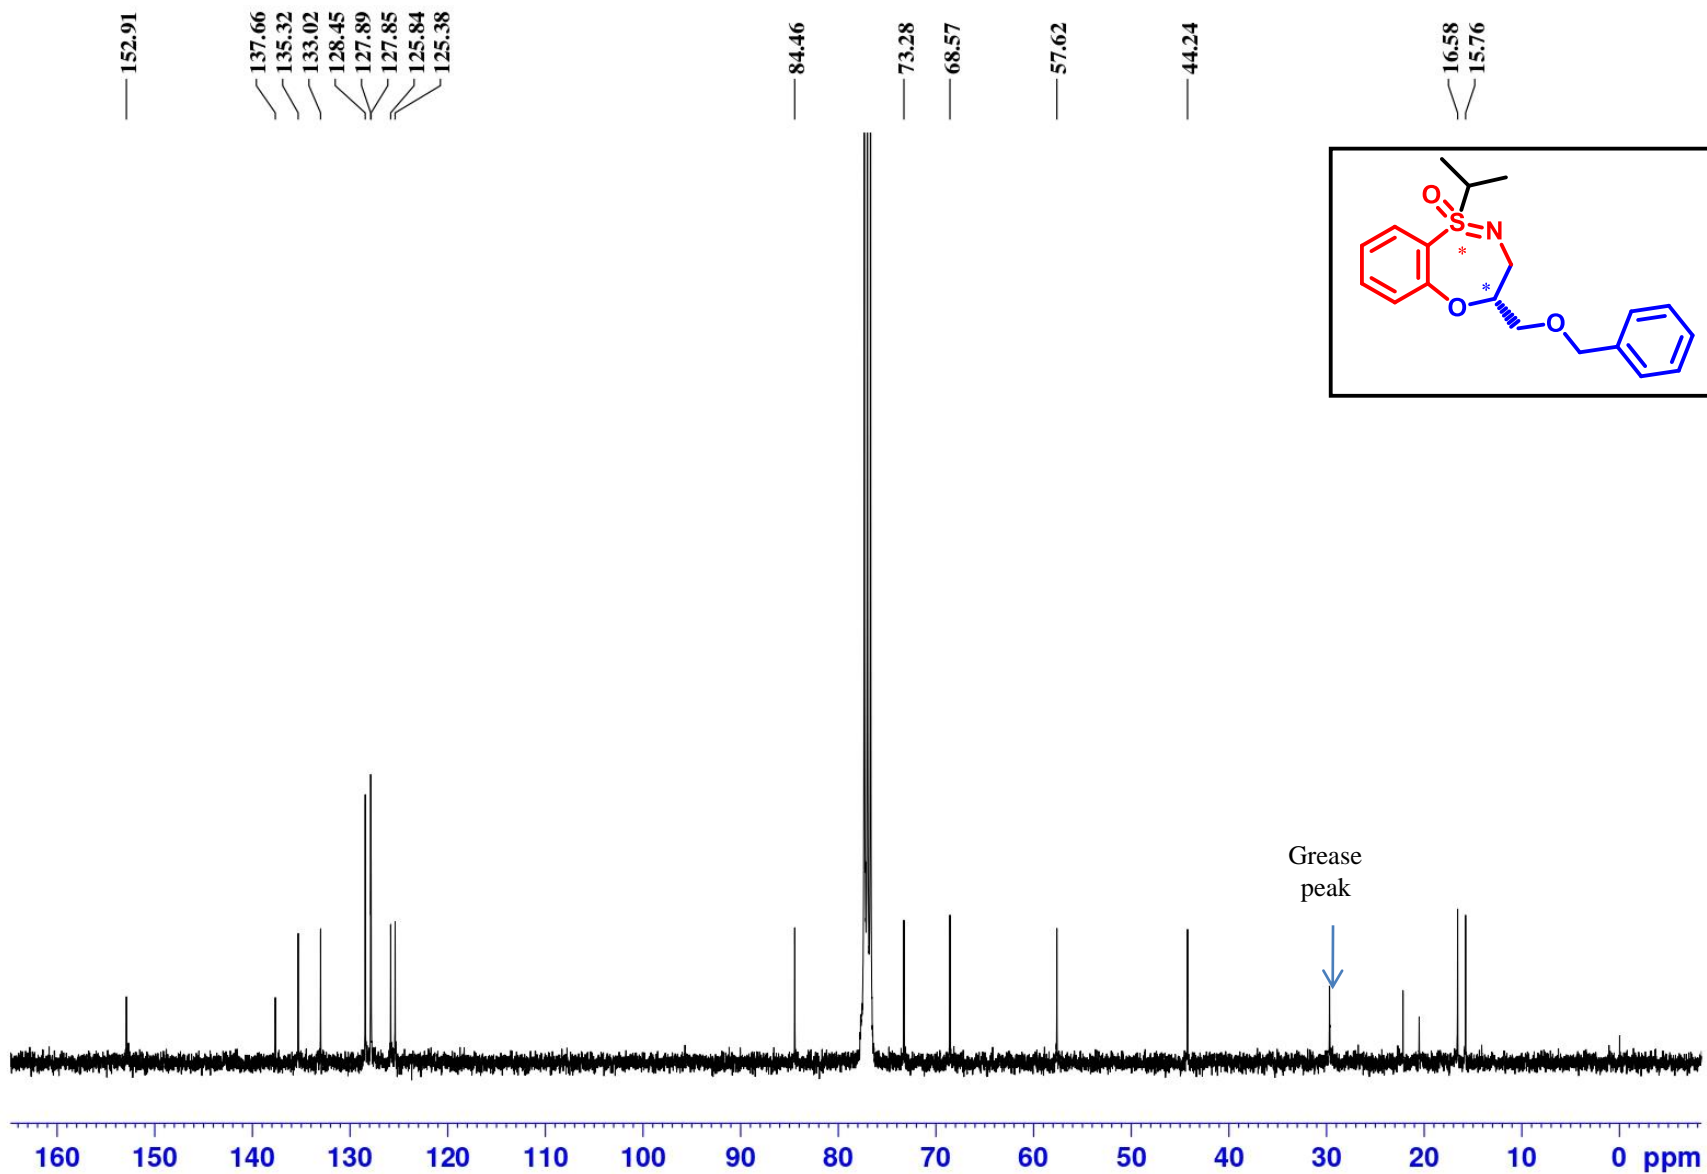

**Fig S-142:**  $^{13}\text{C}$  NMR Spectra of Compound **4w** (100 MHz,  $\text{CDCl}_3$ )

|               |                  |             |             |                 |              |                        |                     |
|---------------|------------------|-------------|-------------|-----------------|--------------|------------------------|---------------------|
| Sample Name   | 4w               | Position    | Vial 37     | Instrument Name | Instrument 1 | User Name              |                     |
| Inj Vol       | 1                | InjPosition |             | SampleType      | Sample       | IRM Calibration Status | Some Ions Missed    |
| Data Filename | HRMS22I02AUG36.d | ACQ Method  | ISOCRATIC.m | Comment         |              | Acquired Time          | 8/2/2022 1:37:30 PM |

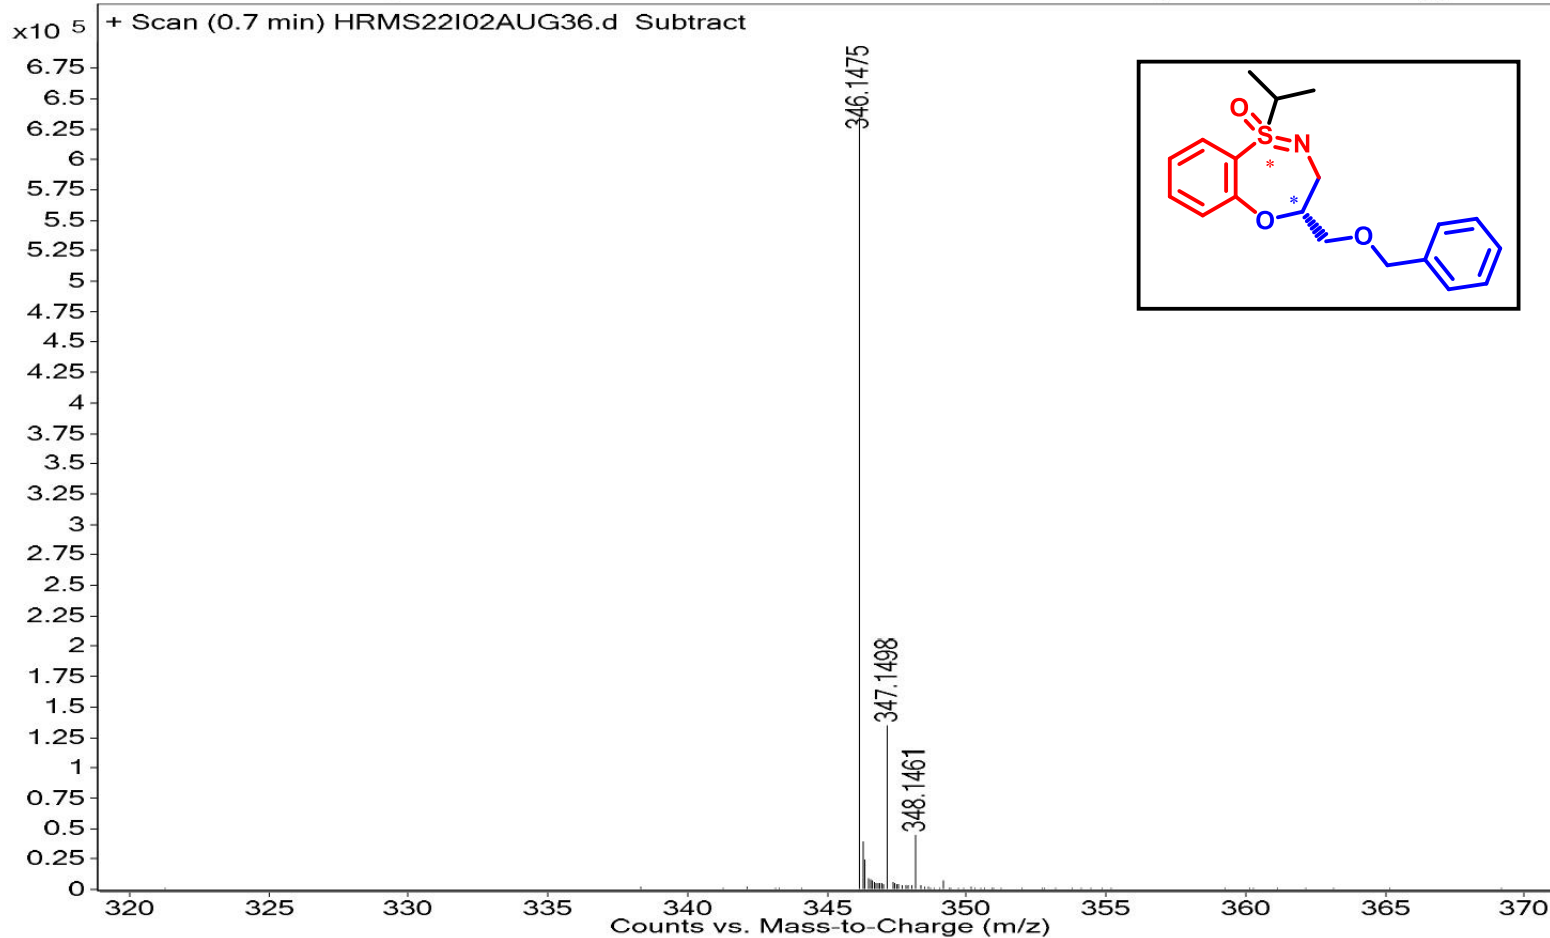

**Fig S-143:** HRMS report of Compound **4w**

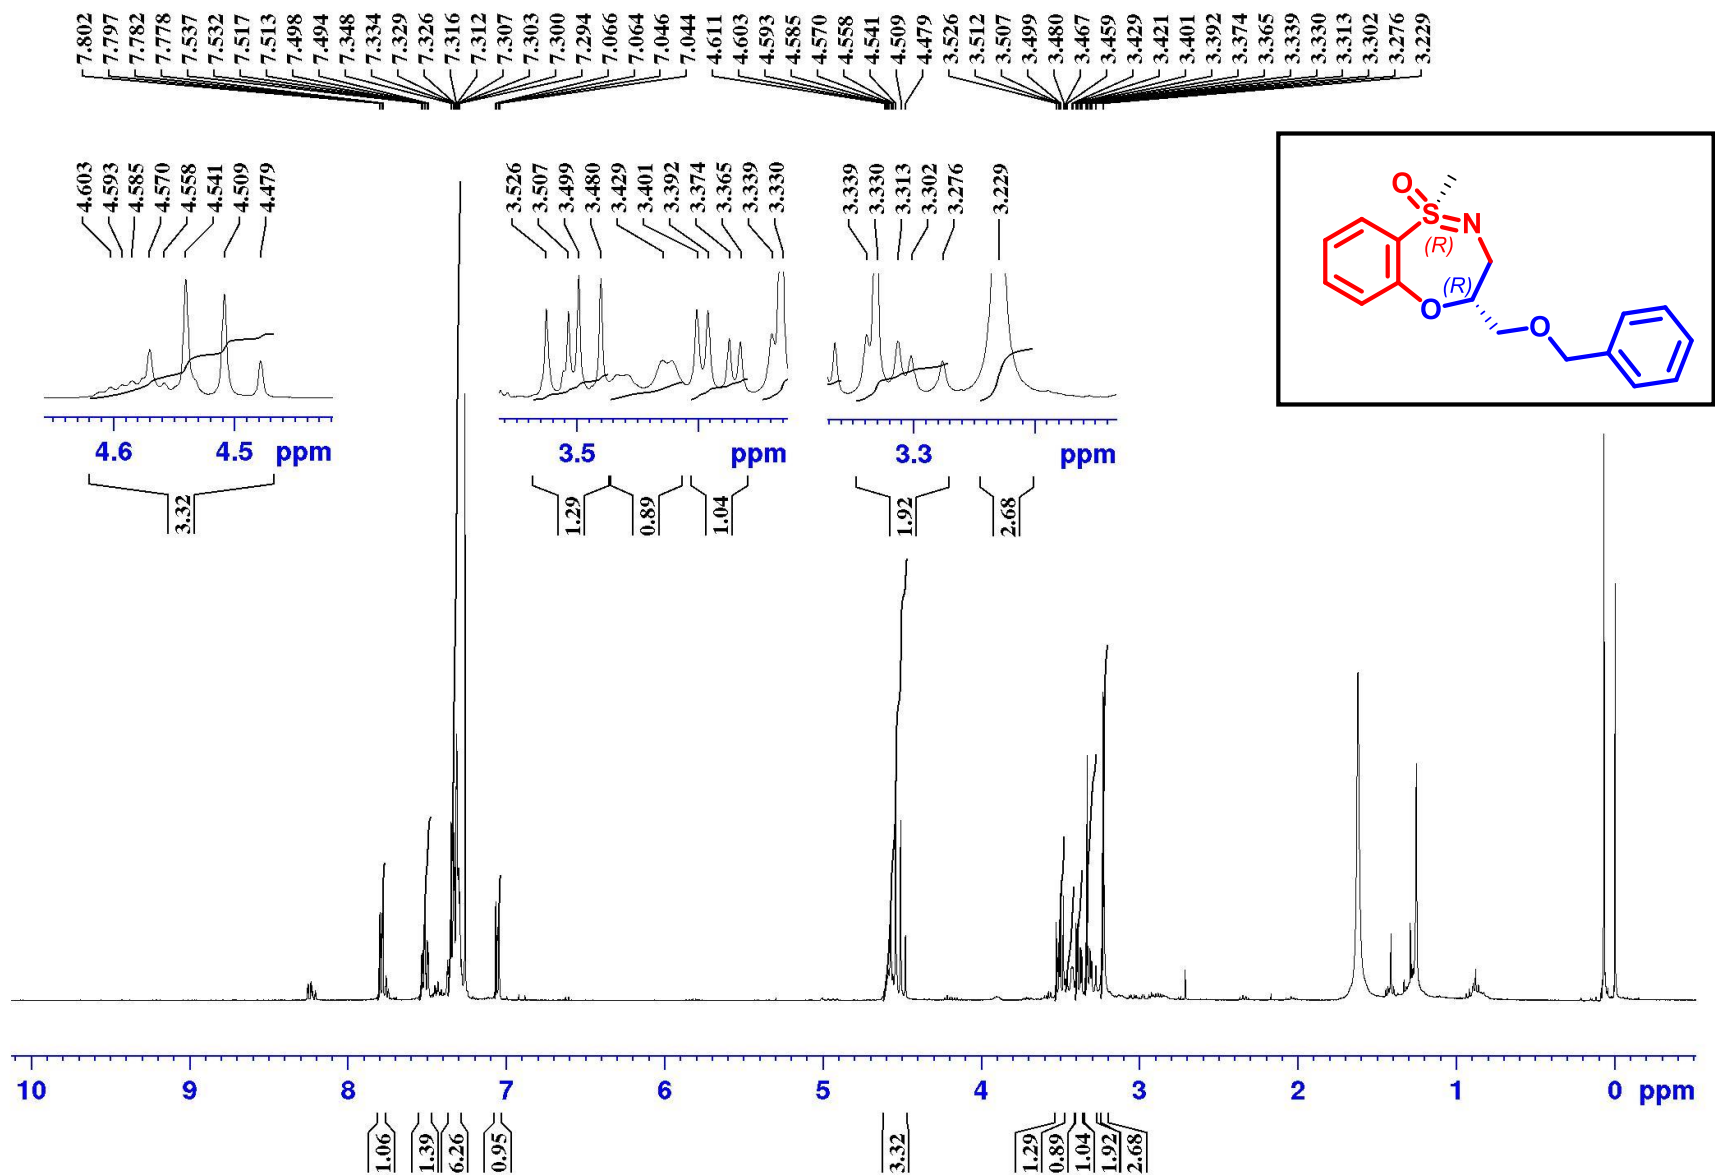

**Fig S-144:**  $^1\text{H}$  NMR Spectra of Compound (*R,R*)-4x (400 MHz,  $\text{CDCl}_3$ )

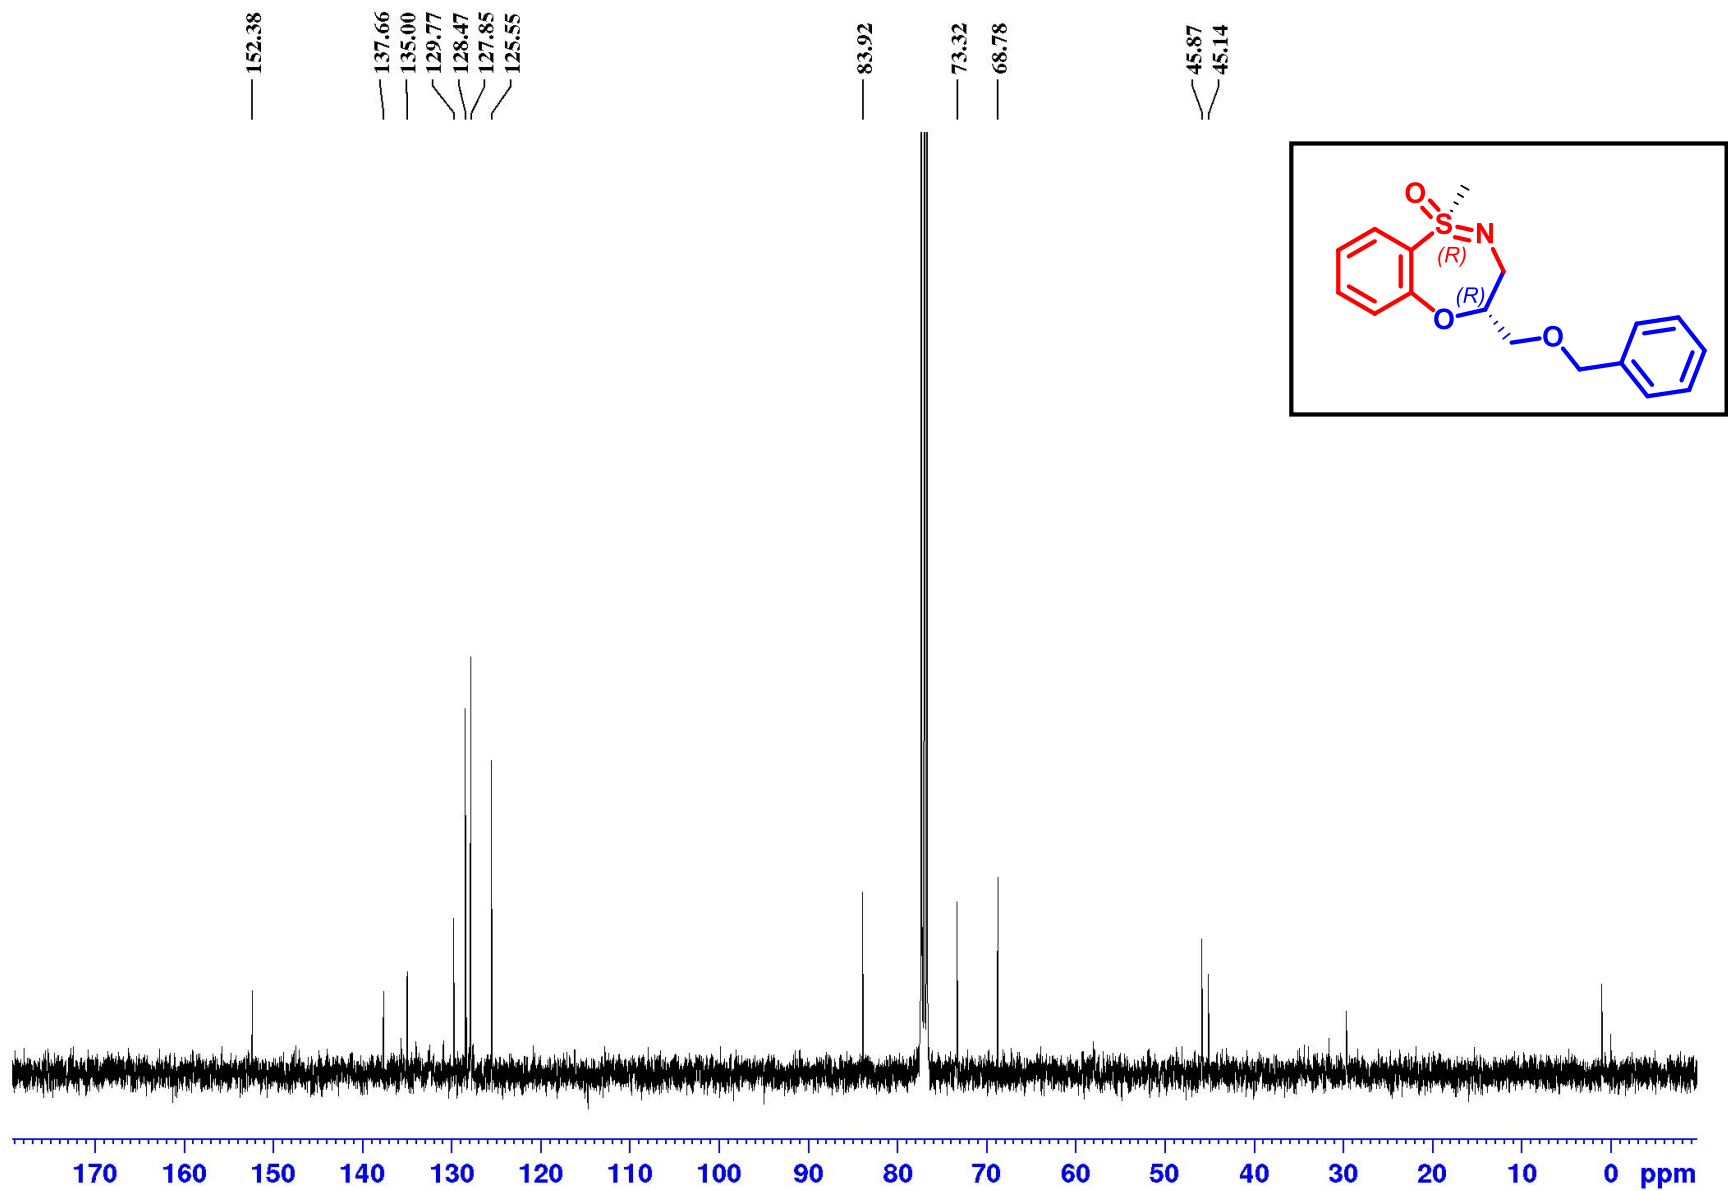

**Fig S-145:**  $^{13}\text{C}$  NMR Spectra of Compound *(R,R)*-4x (100 MHz,  $\text{CDCl}_3$ )

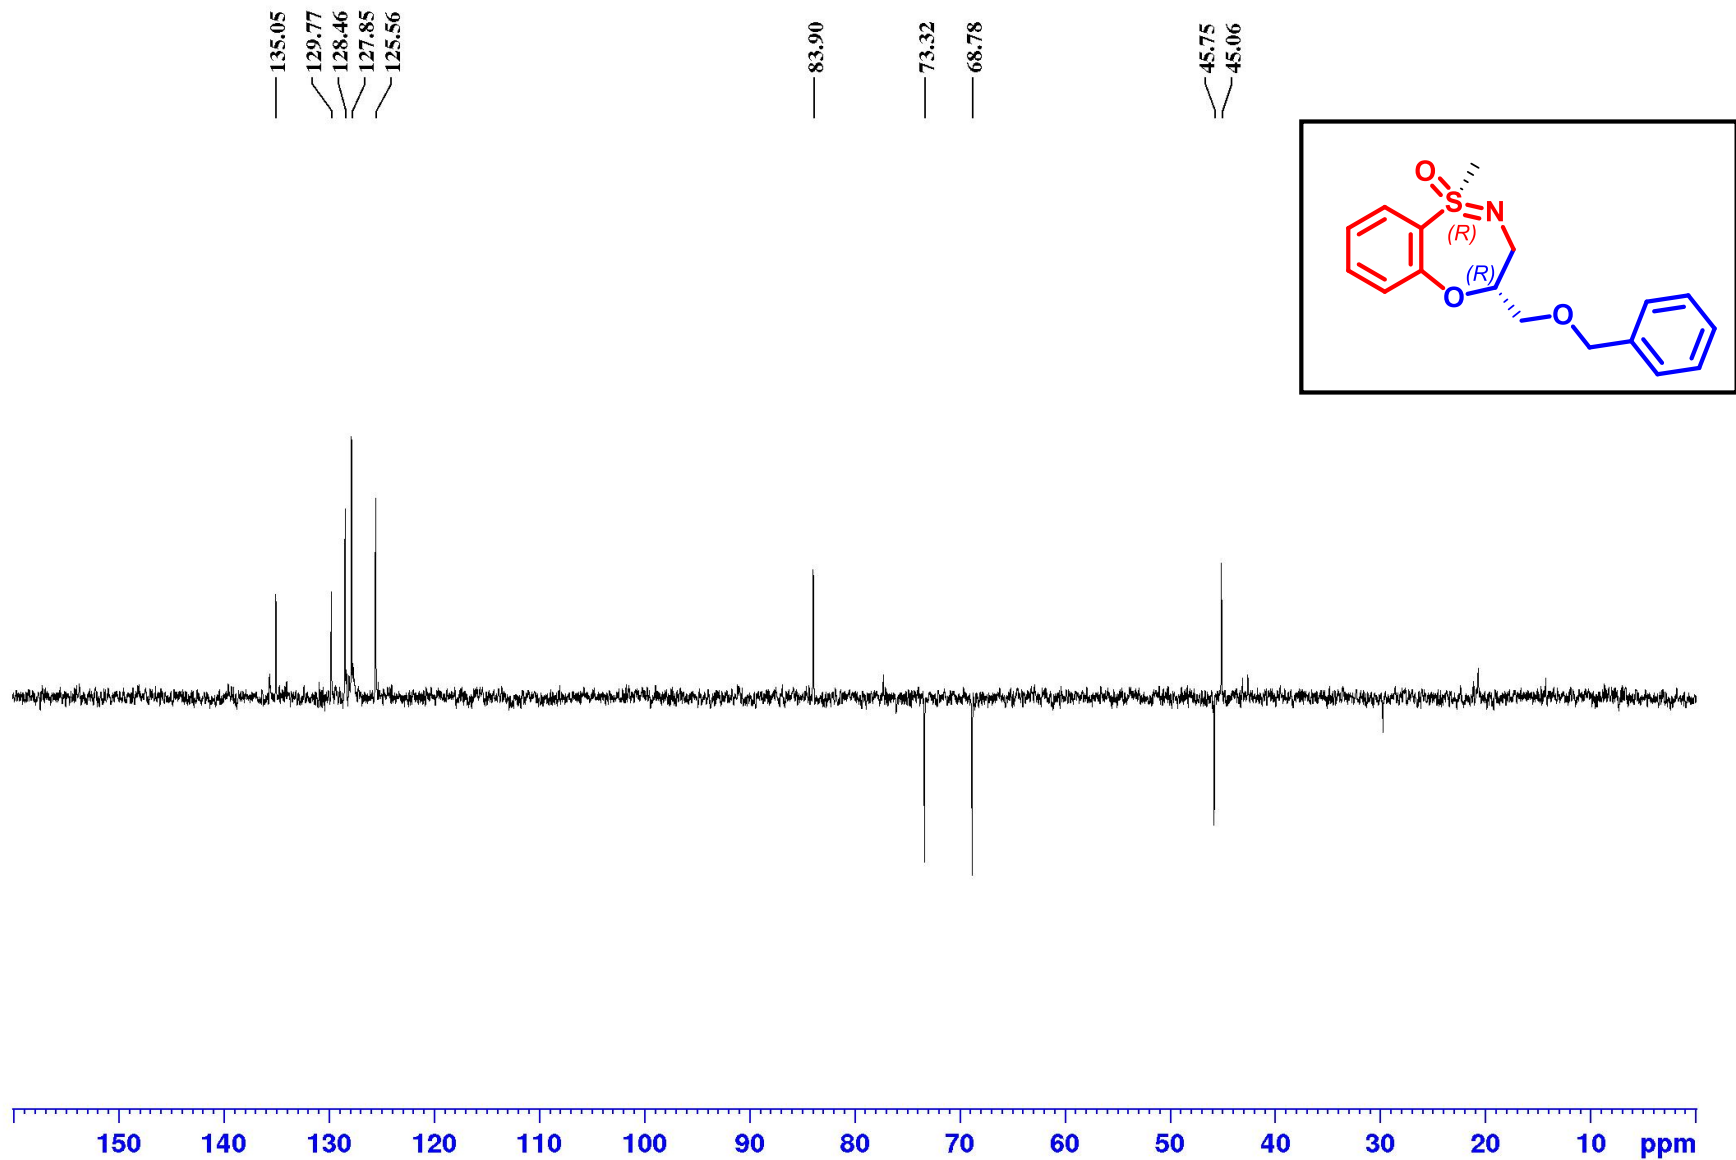

**Fig S-146:** DEPT-135 Spectra of Compound *(R,R)*-4x (100 MHz, CDCl<sub>3</sub>)

|               |                  |             |             |                 |              |                        |                      |
|---------------|------------------|-------------|-------------|-----------------|--------------|------------------------|----------------------|
| Sample Name   | AB-195A          | Position    | Vial 12     | Instrument Name | Instrument 1 | User Name              |                      |
| Inj Vol       | 1                | InjPosition |             | SampleType      | Sample       | IRM Calibration Status | Some Ions Missed     |
| Data Filename | HRMS22I04MAY12.d | ACQ Method  | ISOCRATIC.m | Comment         |              | Acquired Time          | 5/4/2022 12:02:33 PM |

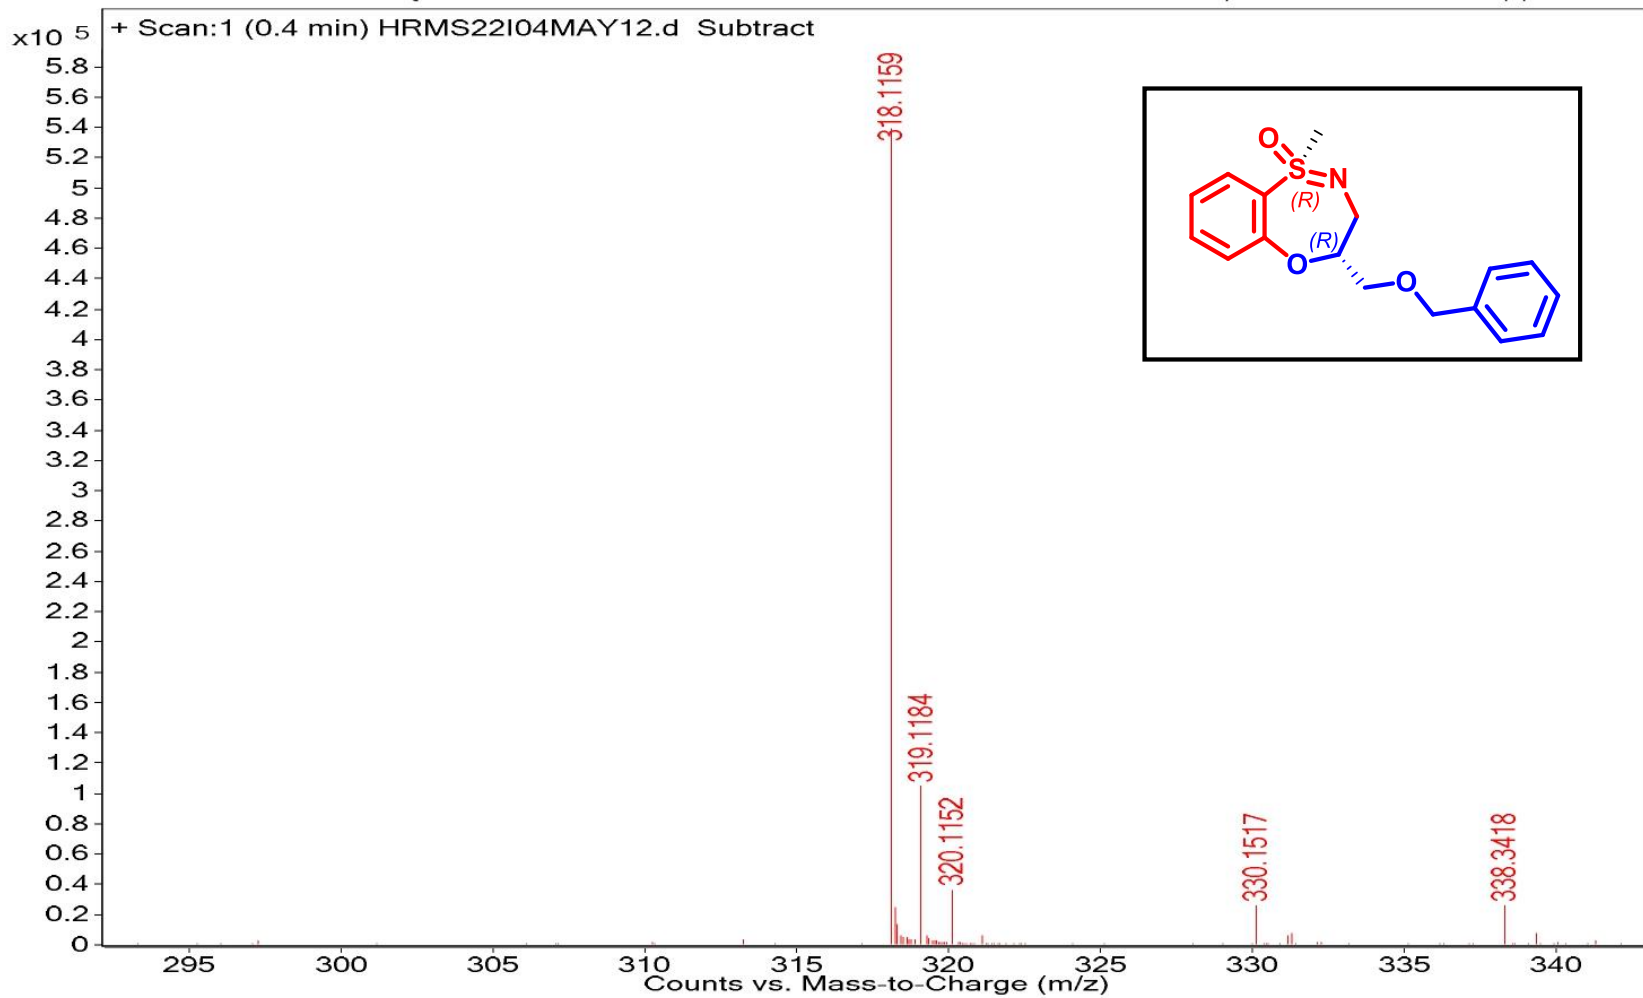

**Fig S-147:** HRMS report of Compound (*R,R*)-4x



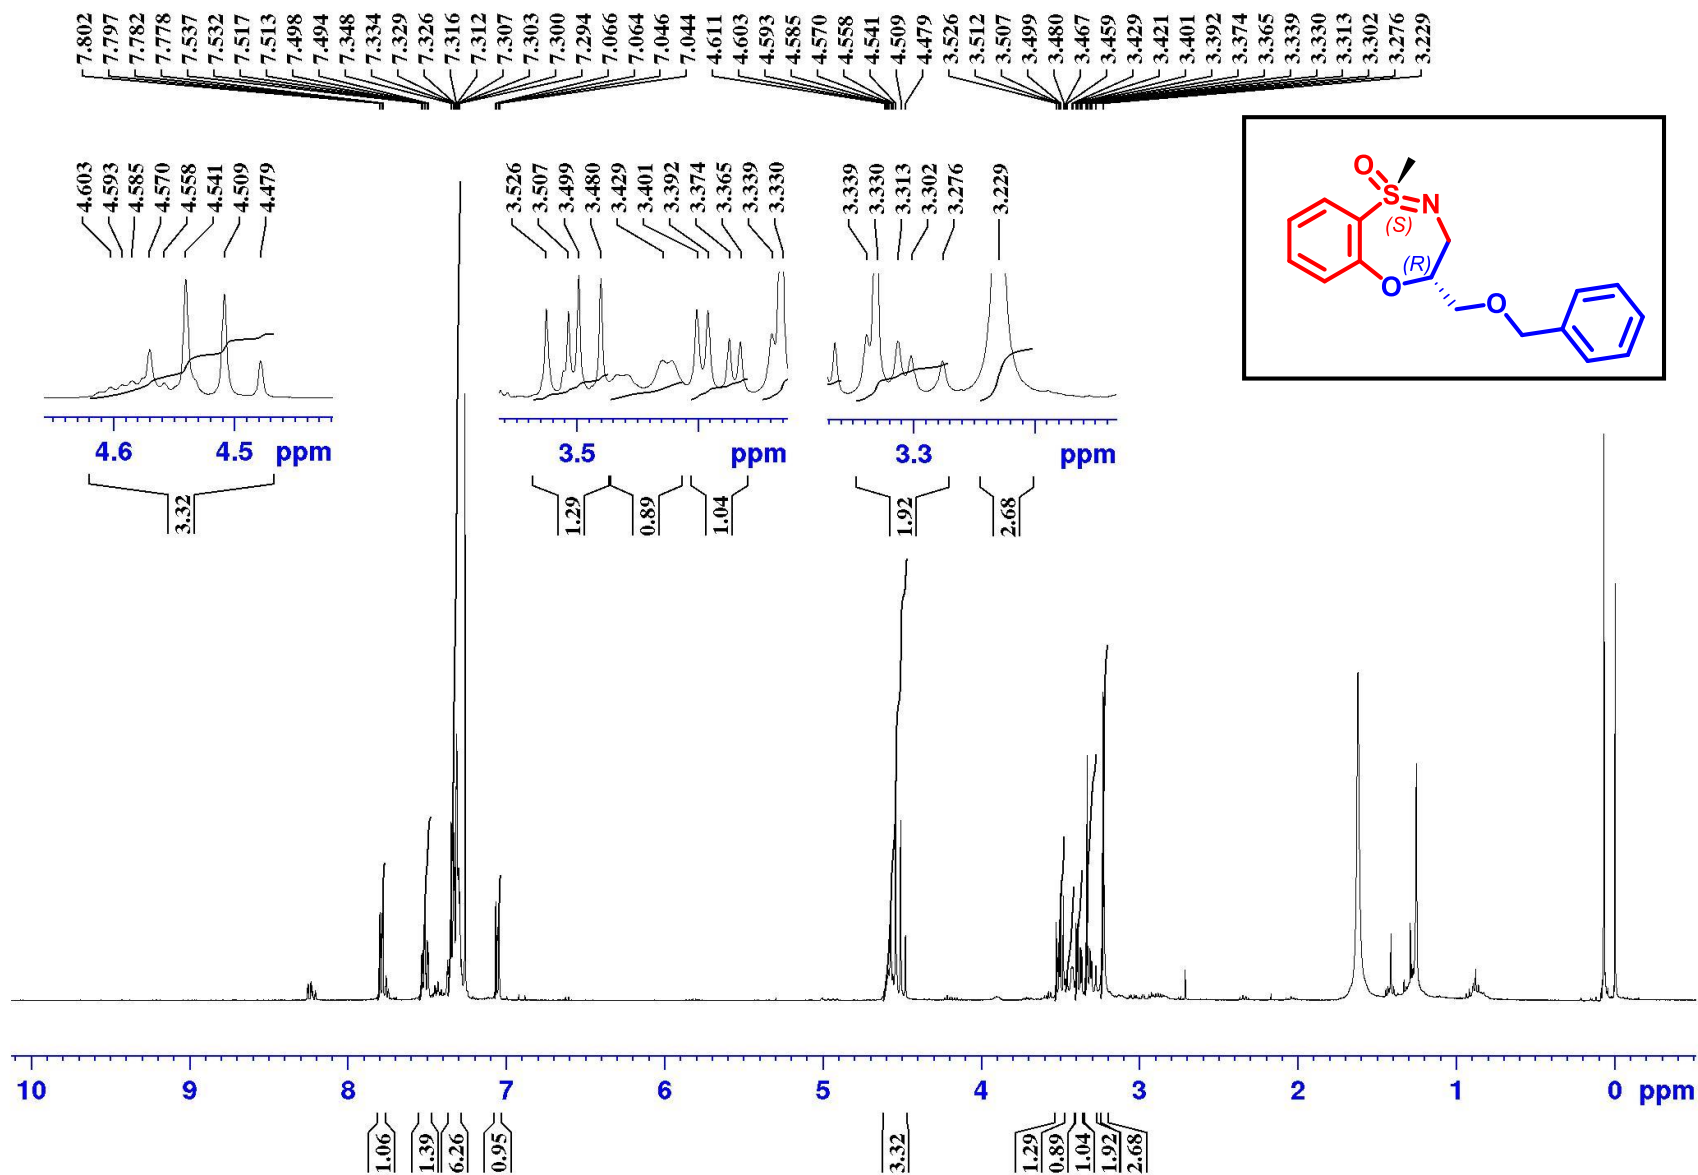

**Fig S-148:**  $^1\text{H}$  NMR Spectra of Compound (*R,S*)- 4x'(400 MHz,  $\text{CDCl}_3$ )

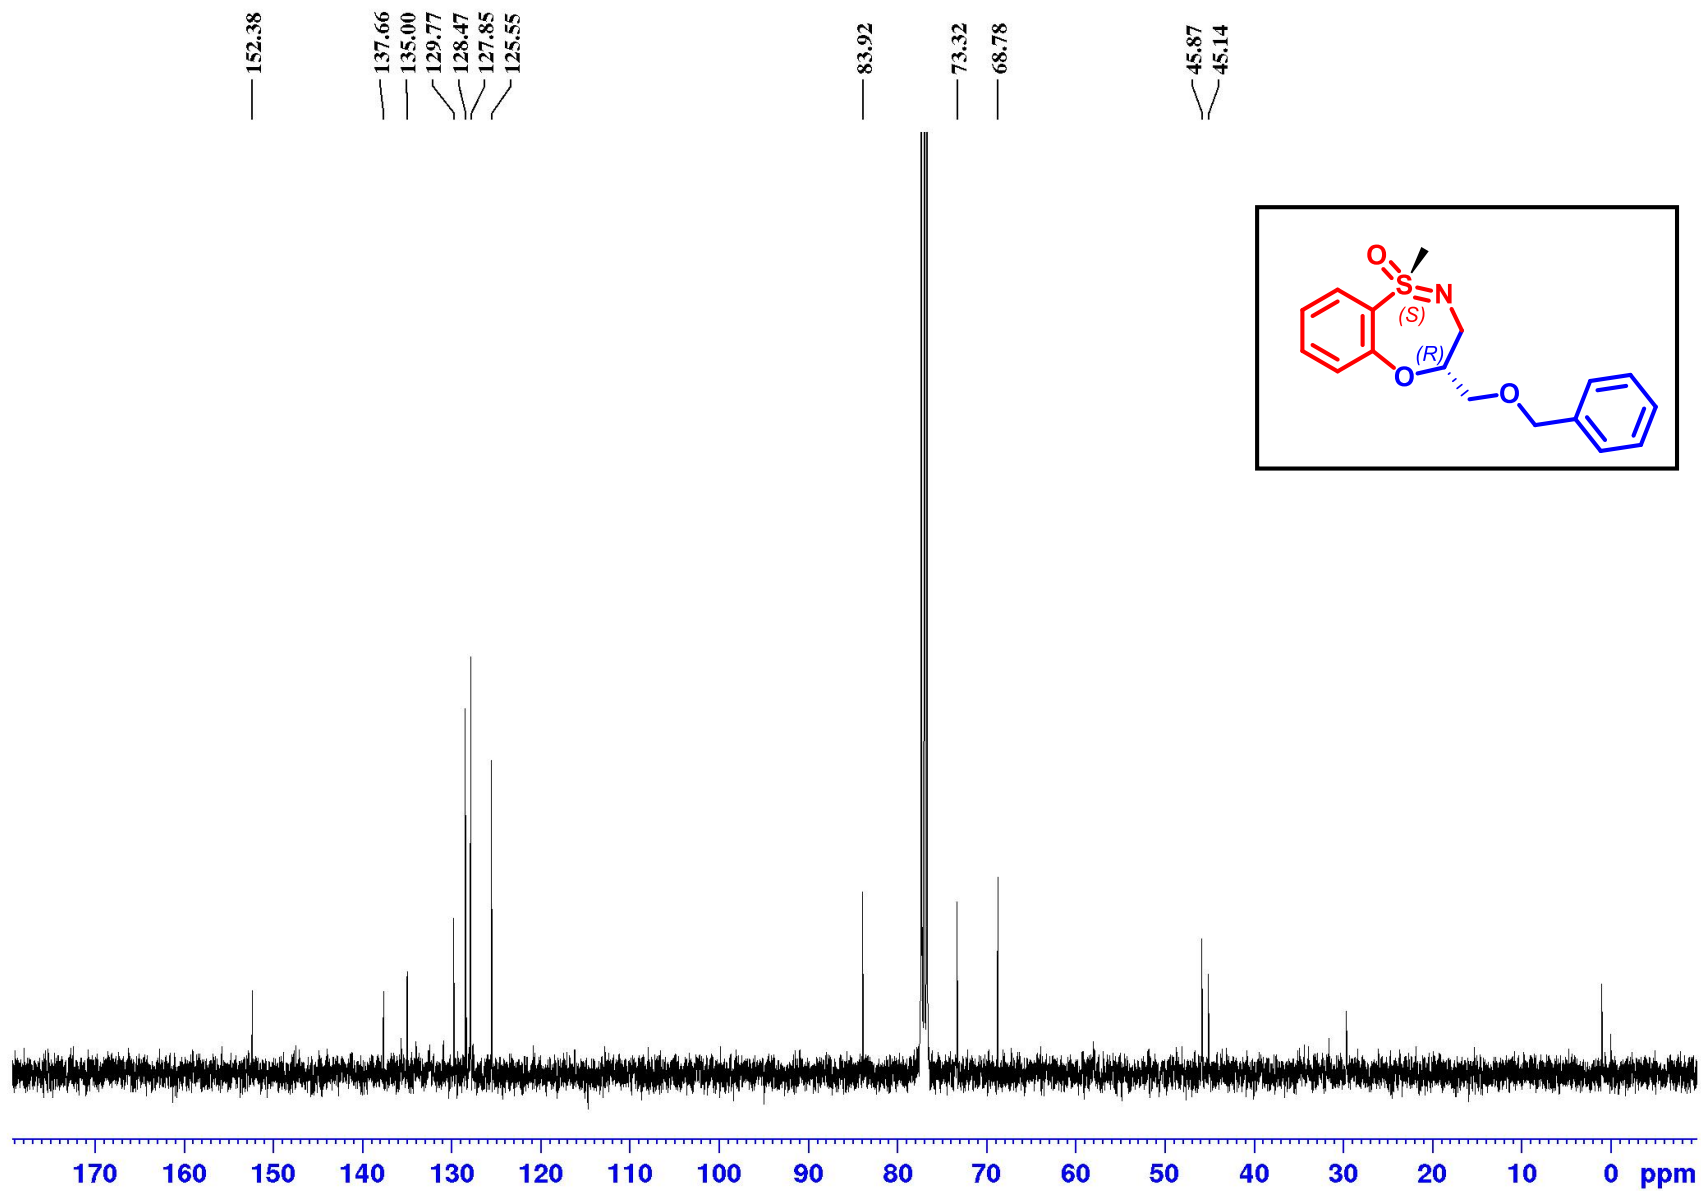

**Fig S-149:**  $^{13}\text{C}$  NMR Spectra of Compound  $(R,S)$ -4x' (100 MHz,  $\text{CDCl}_3$ )

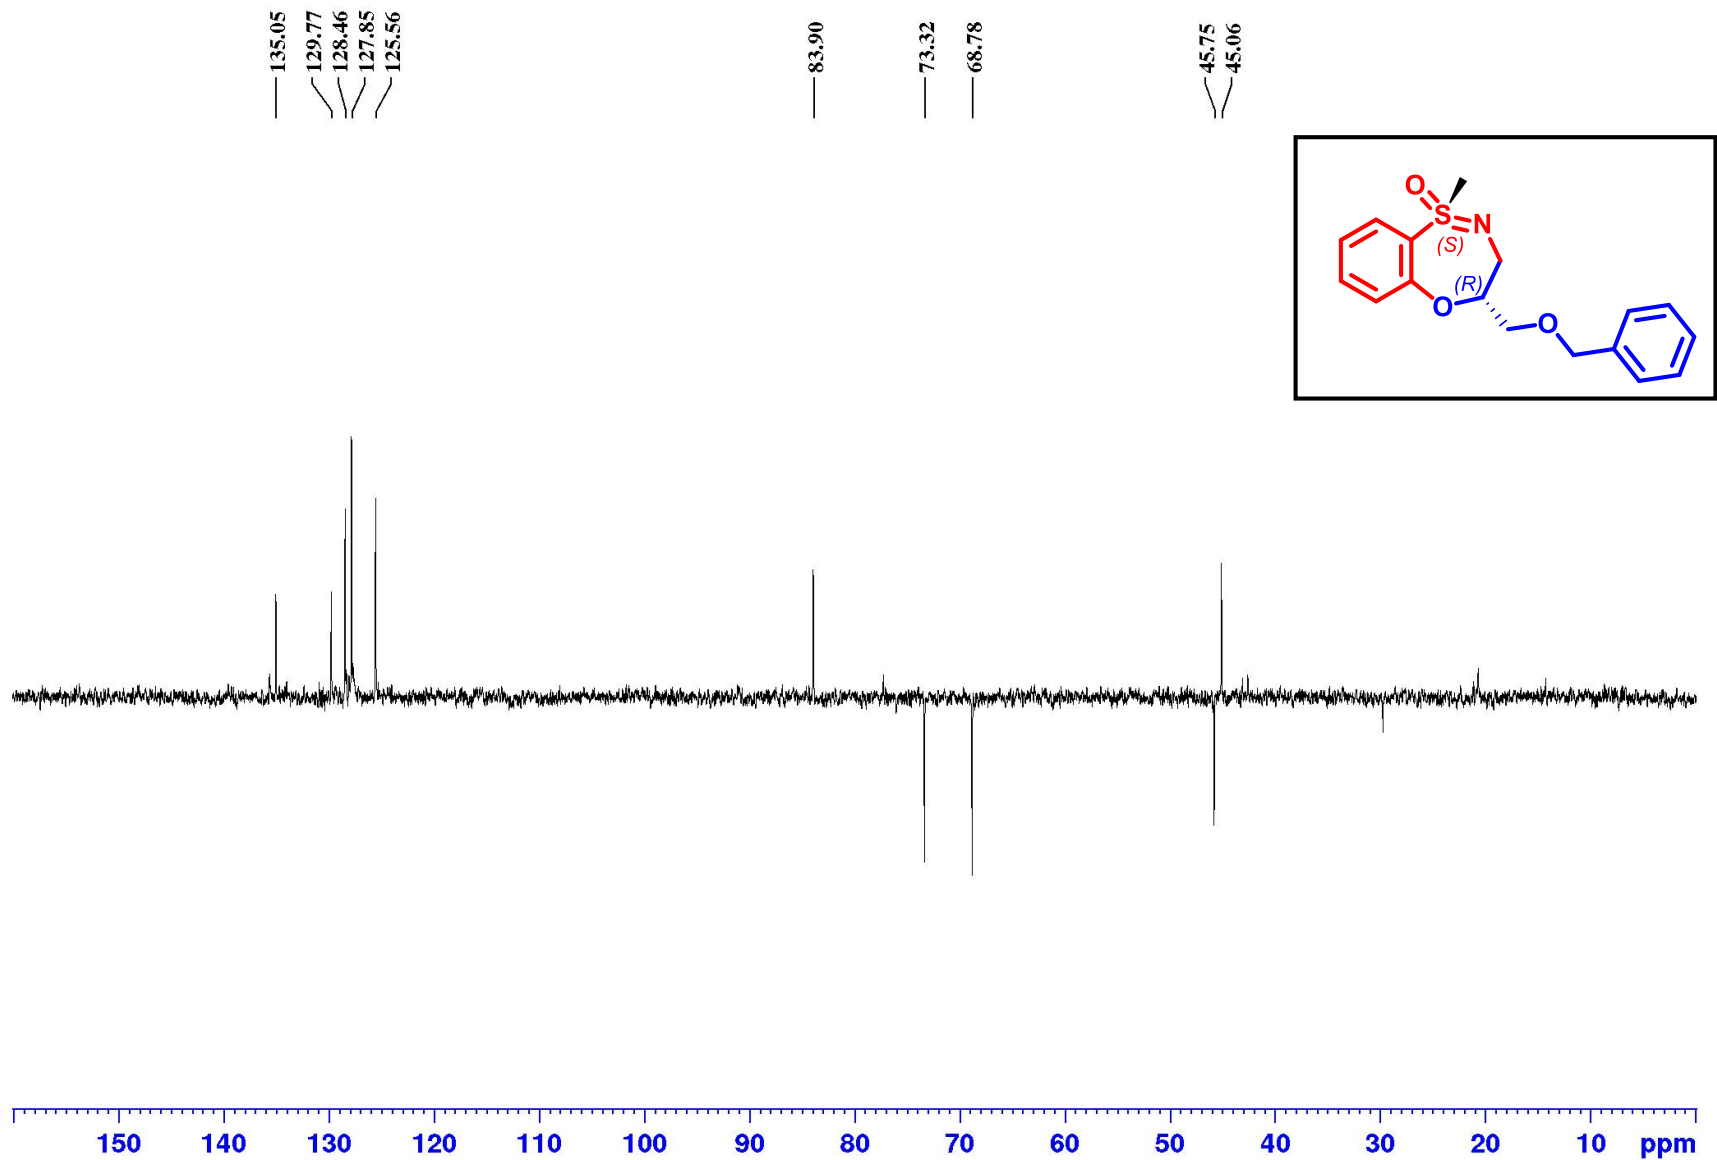

**Fig S-150:** DEPT-135 Spectra of Compound (*R,S*)- 4x' (100 MHz, CDCl<sub>3</sub>)

|               |                  |             |             |                 |              |                        |                     |
|---------------|------------------|-------------|-------------|-----------------|--------------|------------------------|---------------------|
| Sample Name   | 4x'              | Position    | Vial 38     | Instrument Name | Instrument 1 | User Name              |                     |
| Inj Vol       | 1                | InjPosition |             | SampleType      | Sample       | IRM Calibration Status | Some Ions Missed    |
| Data Filename | HRMS22I02AUG37.d | ACQ Method  | ISOCRATIC.m | Comment         |              | Acquired Time          | 8/2/2022 1:40:39 PM |

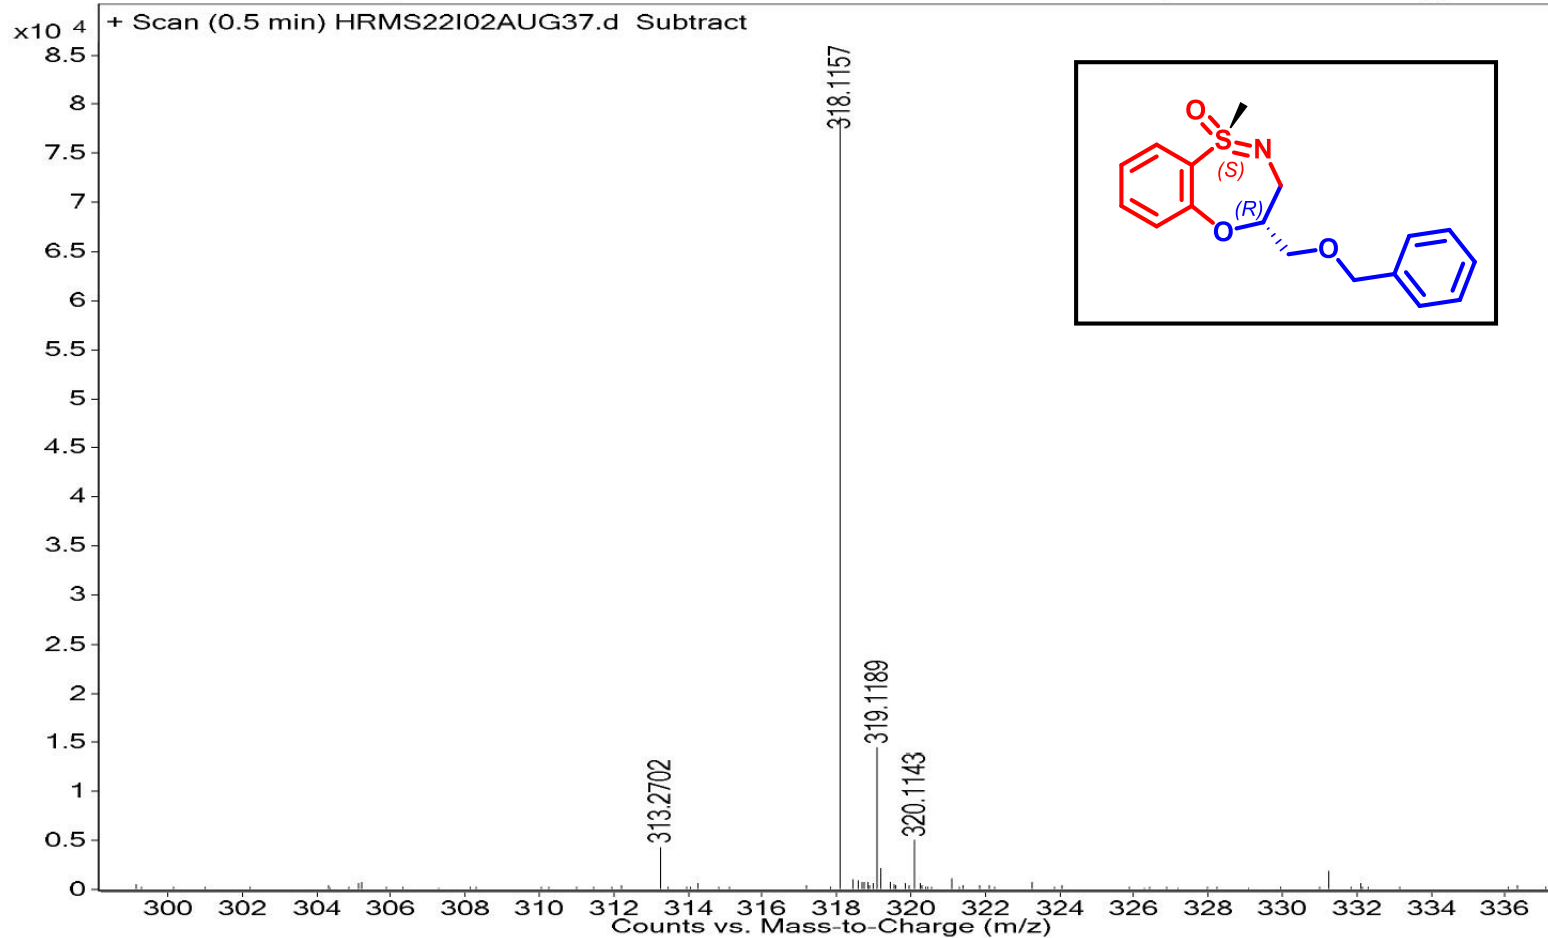

**Fig S-151:** HRMS report of Compound 4x'

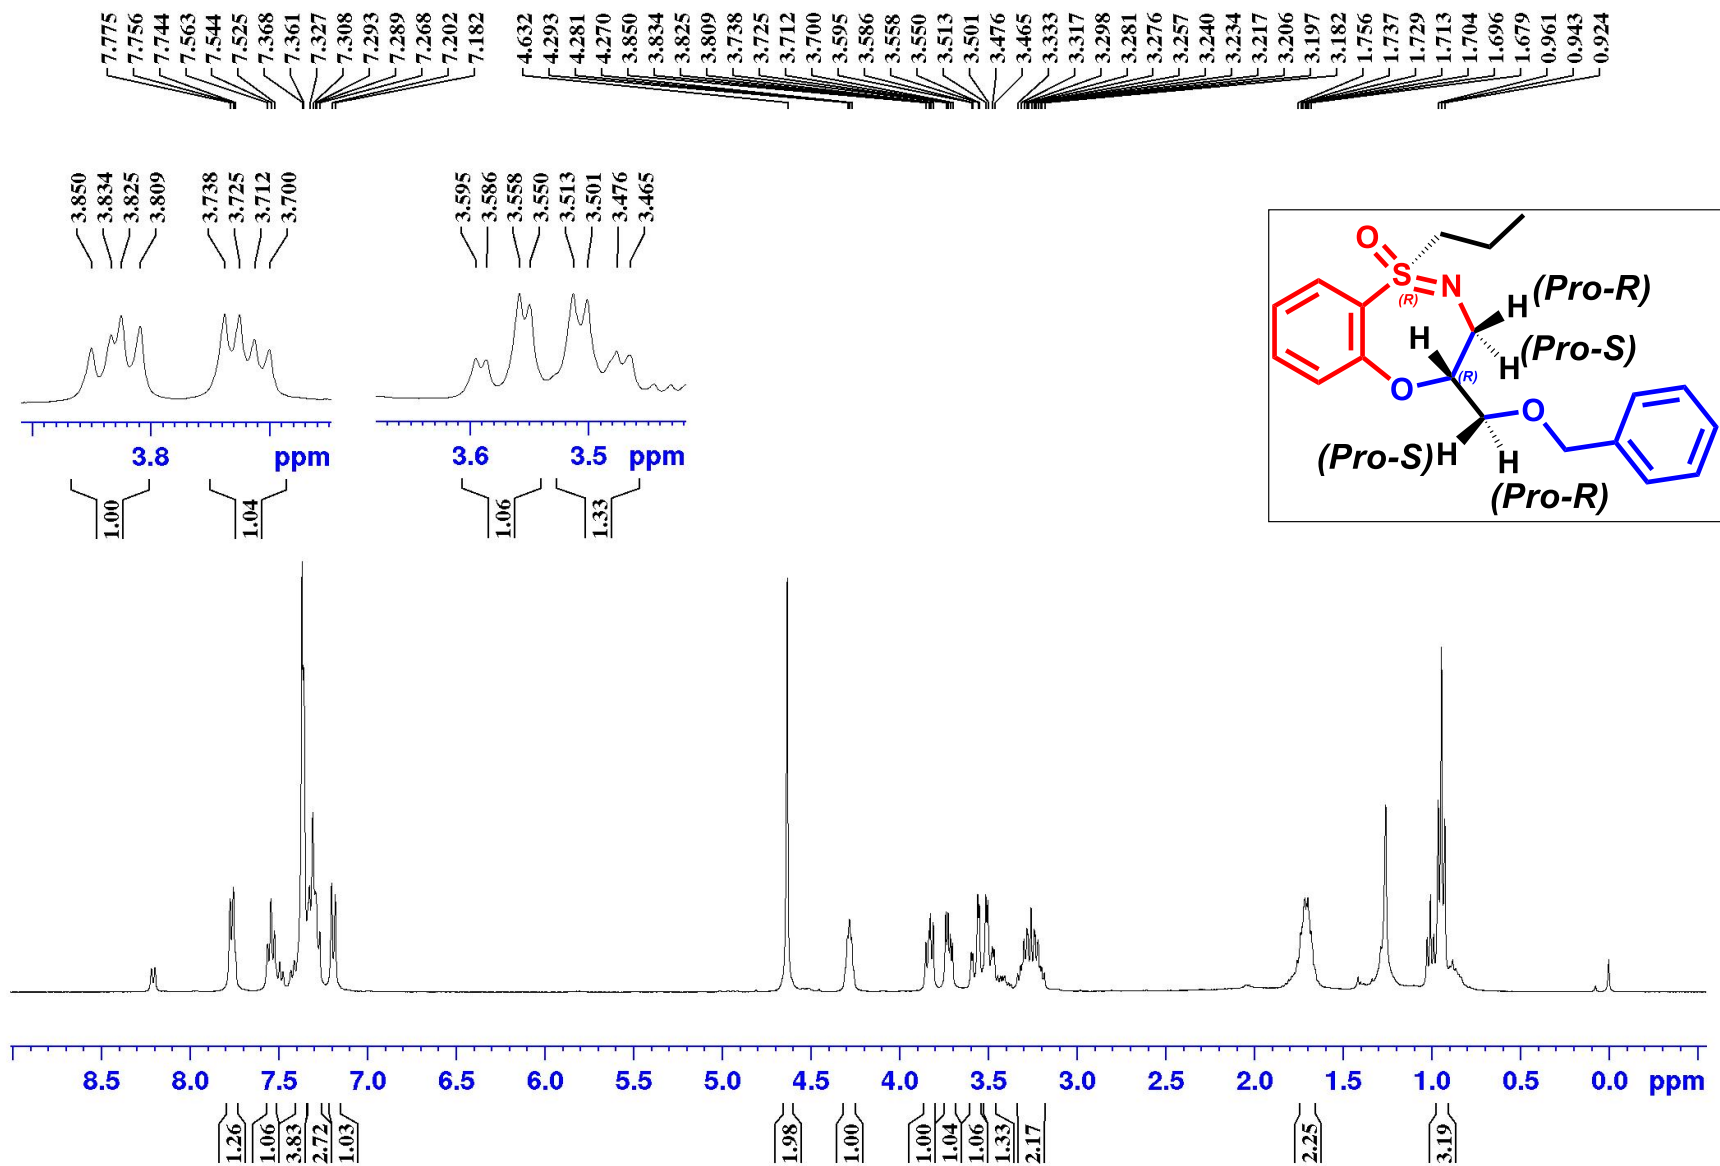

**Fig S-152:** <sup>1</sup>H NMR Spectra of Compound *(R,R)*-4z (400 MHz, CDCl<sub>3</sub>)

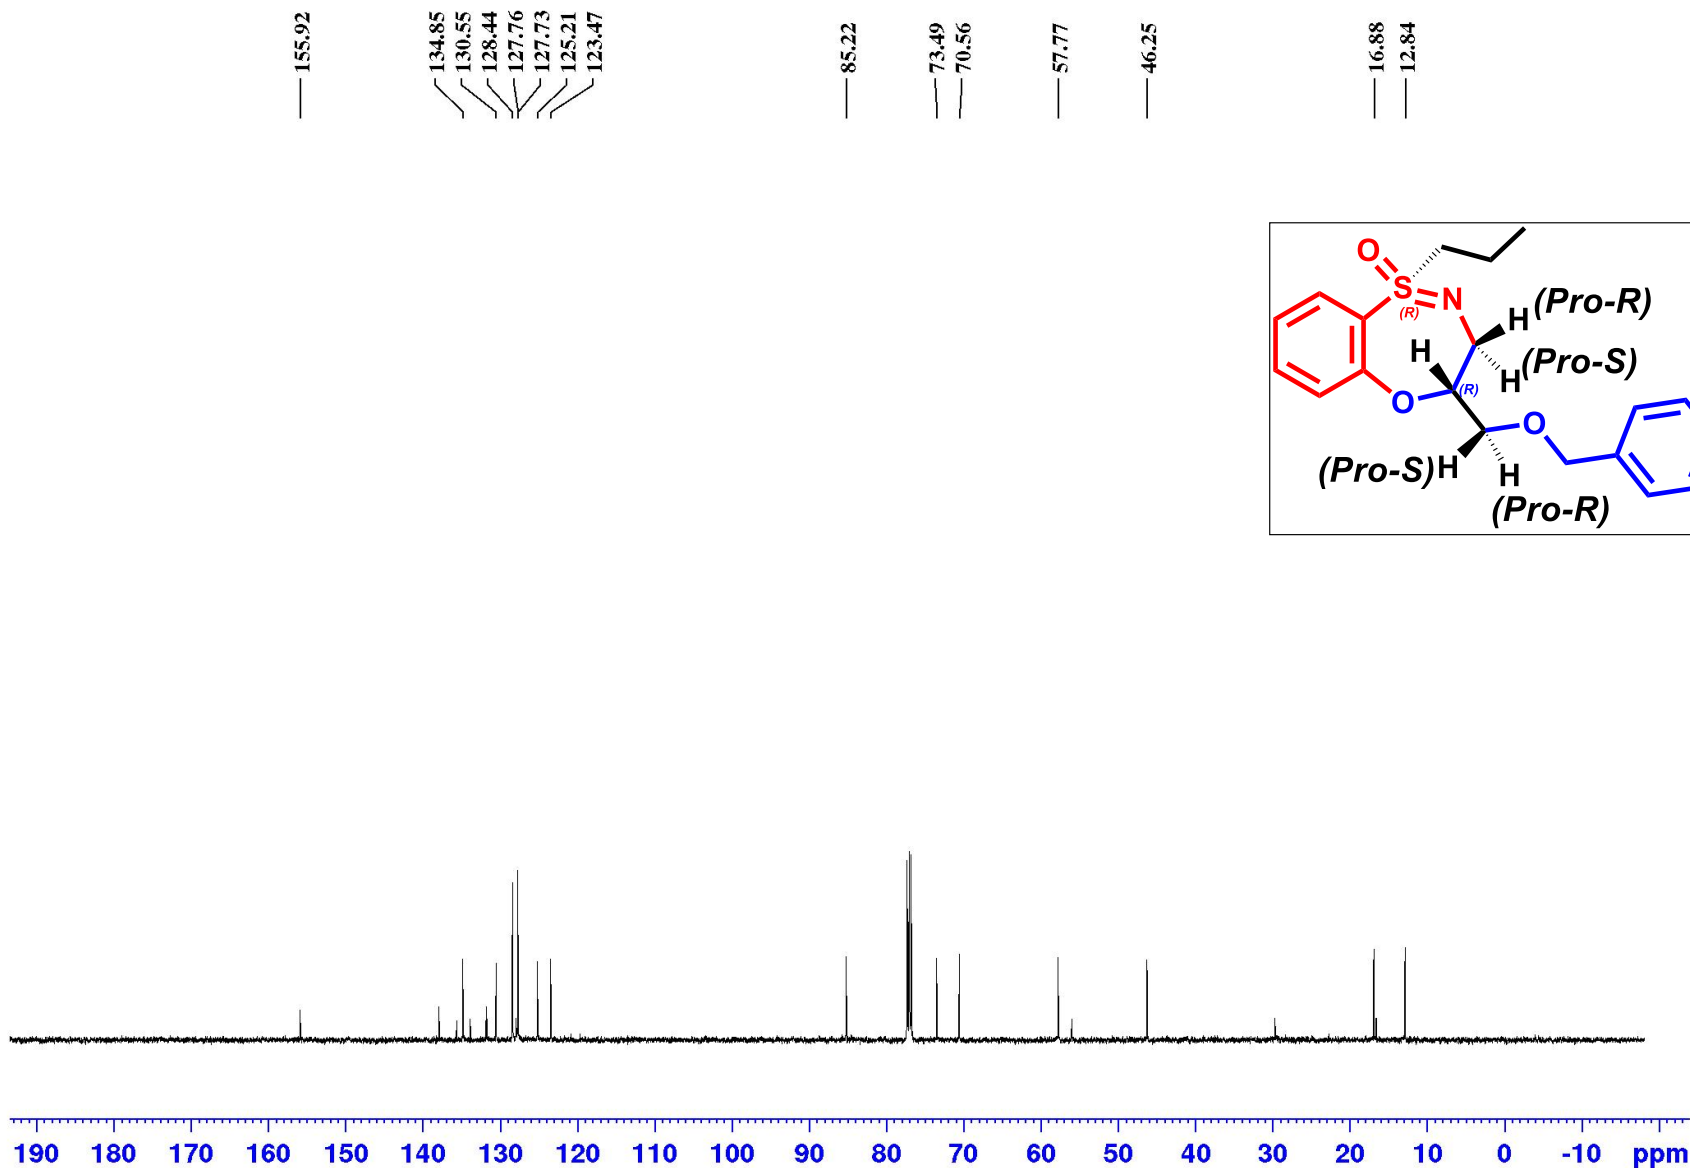

**Fig S-153:**  $^{13}\text{C}$  NMR Spectra of Compound **(R,R)-4z** (125 MHz,  $\text{CDCl}_3$ )

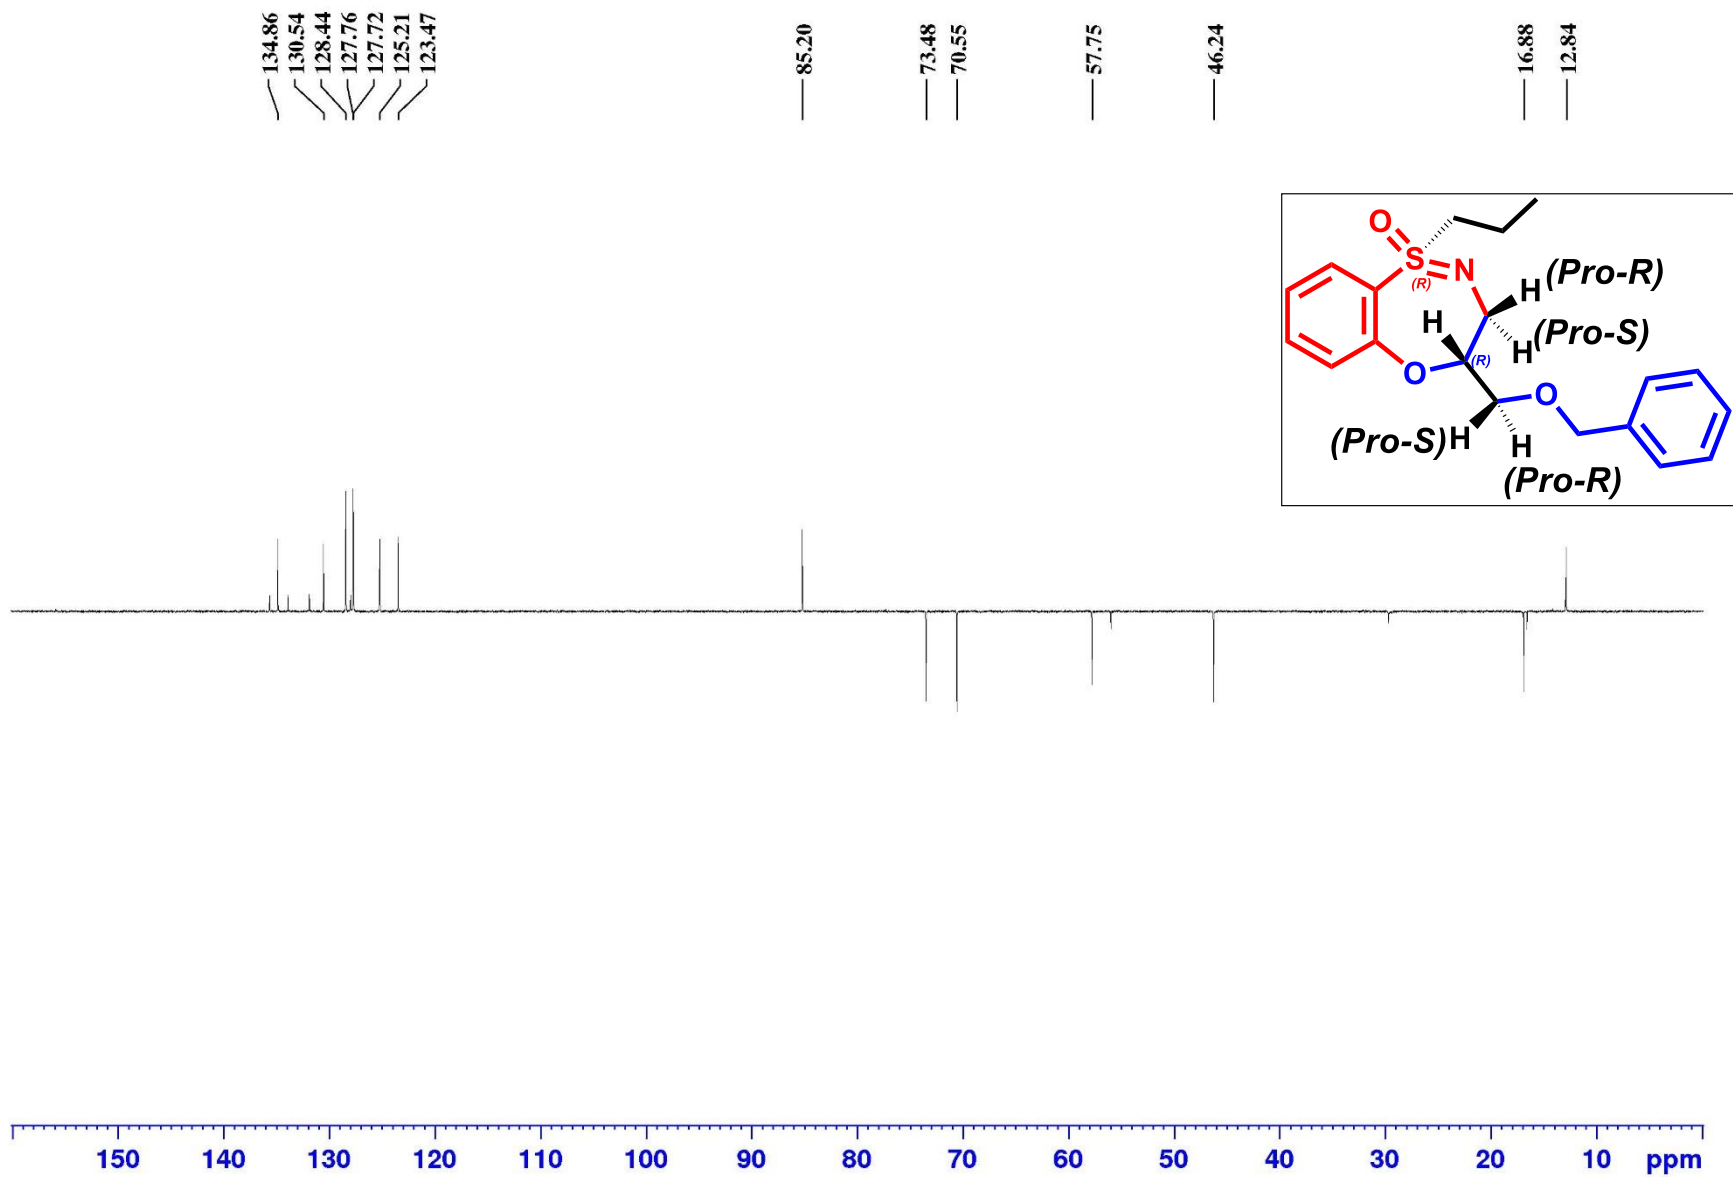

**Fig S-154:** DEPT-135 Spectra of Compound **(R,R)-4z** (100 MHz,  $\text{CDCl}_3$ )

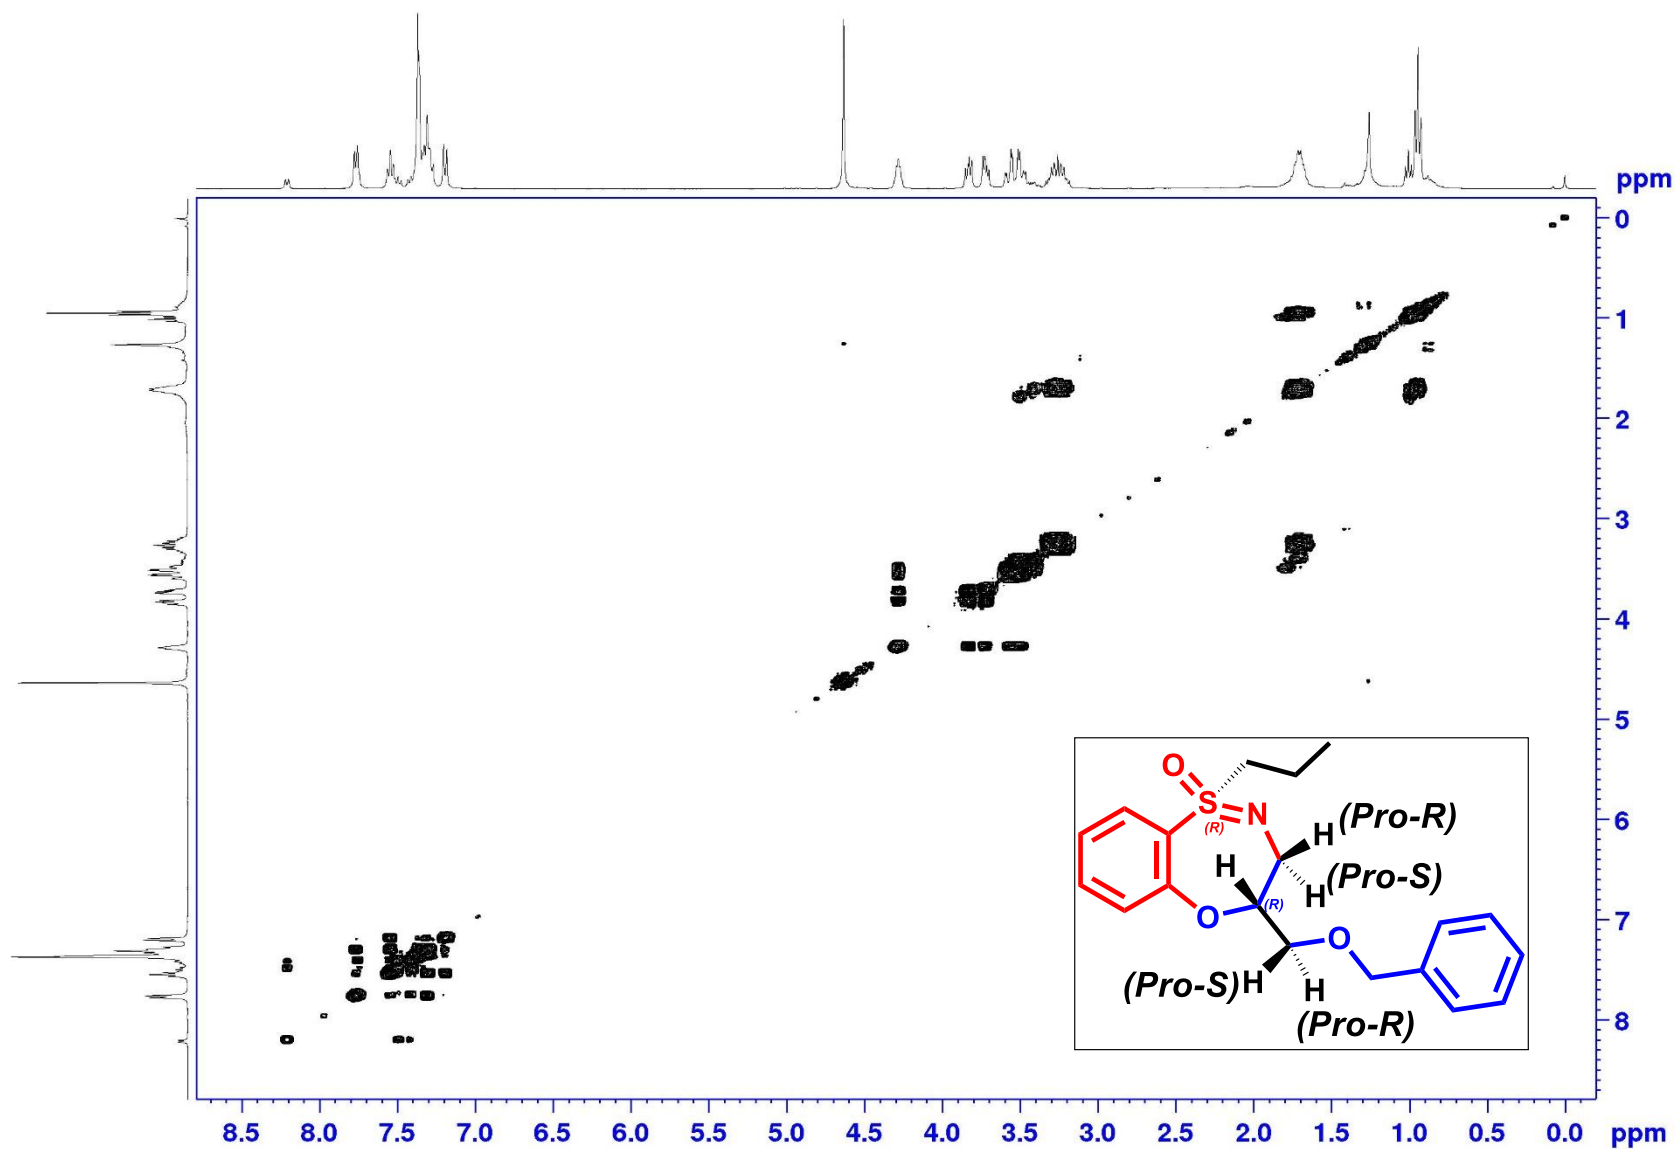

**Fig S-155:** COSY Spectra of Compound (*R,R*)-4z (400 MHz, CDCl<sub>3</sub>)



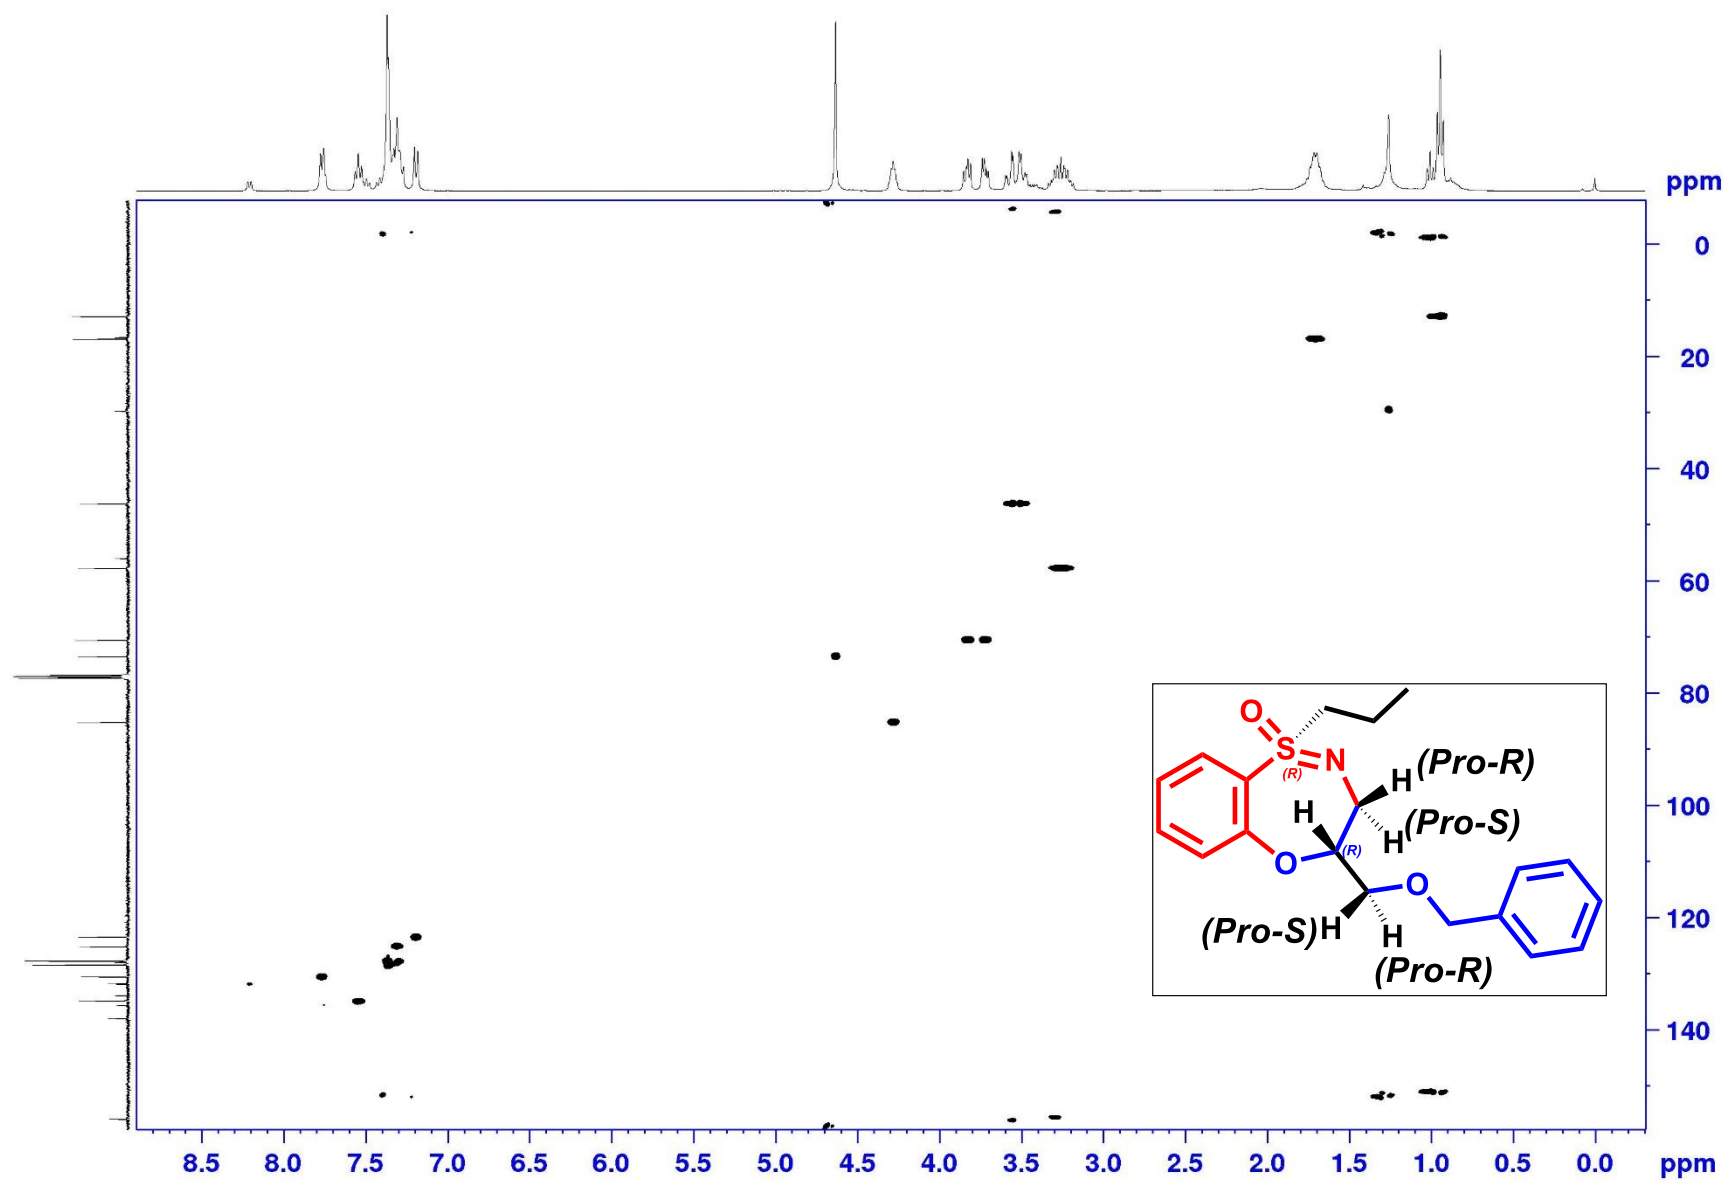

**Fig S-156:** HSQC Spectra of Compound (*R,R*)-4z (400 MHz, CDCl<sub>3</sub>)

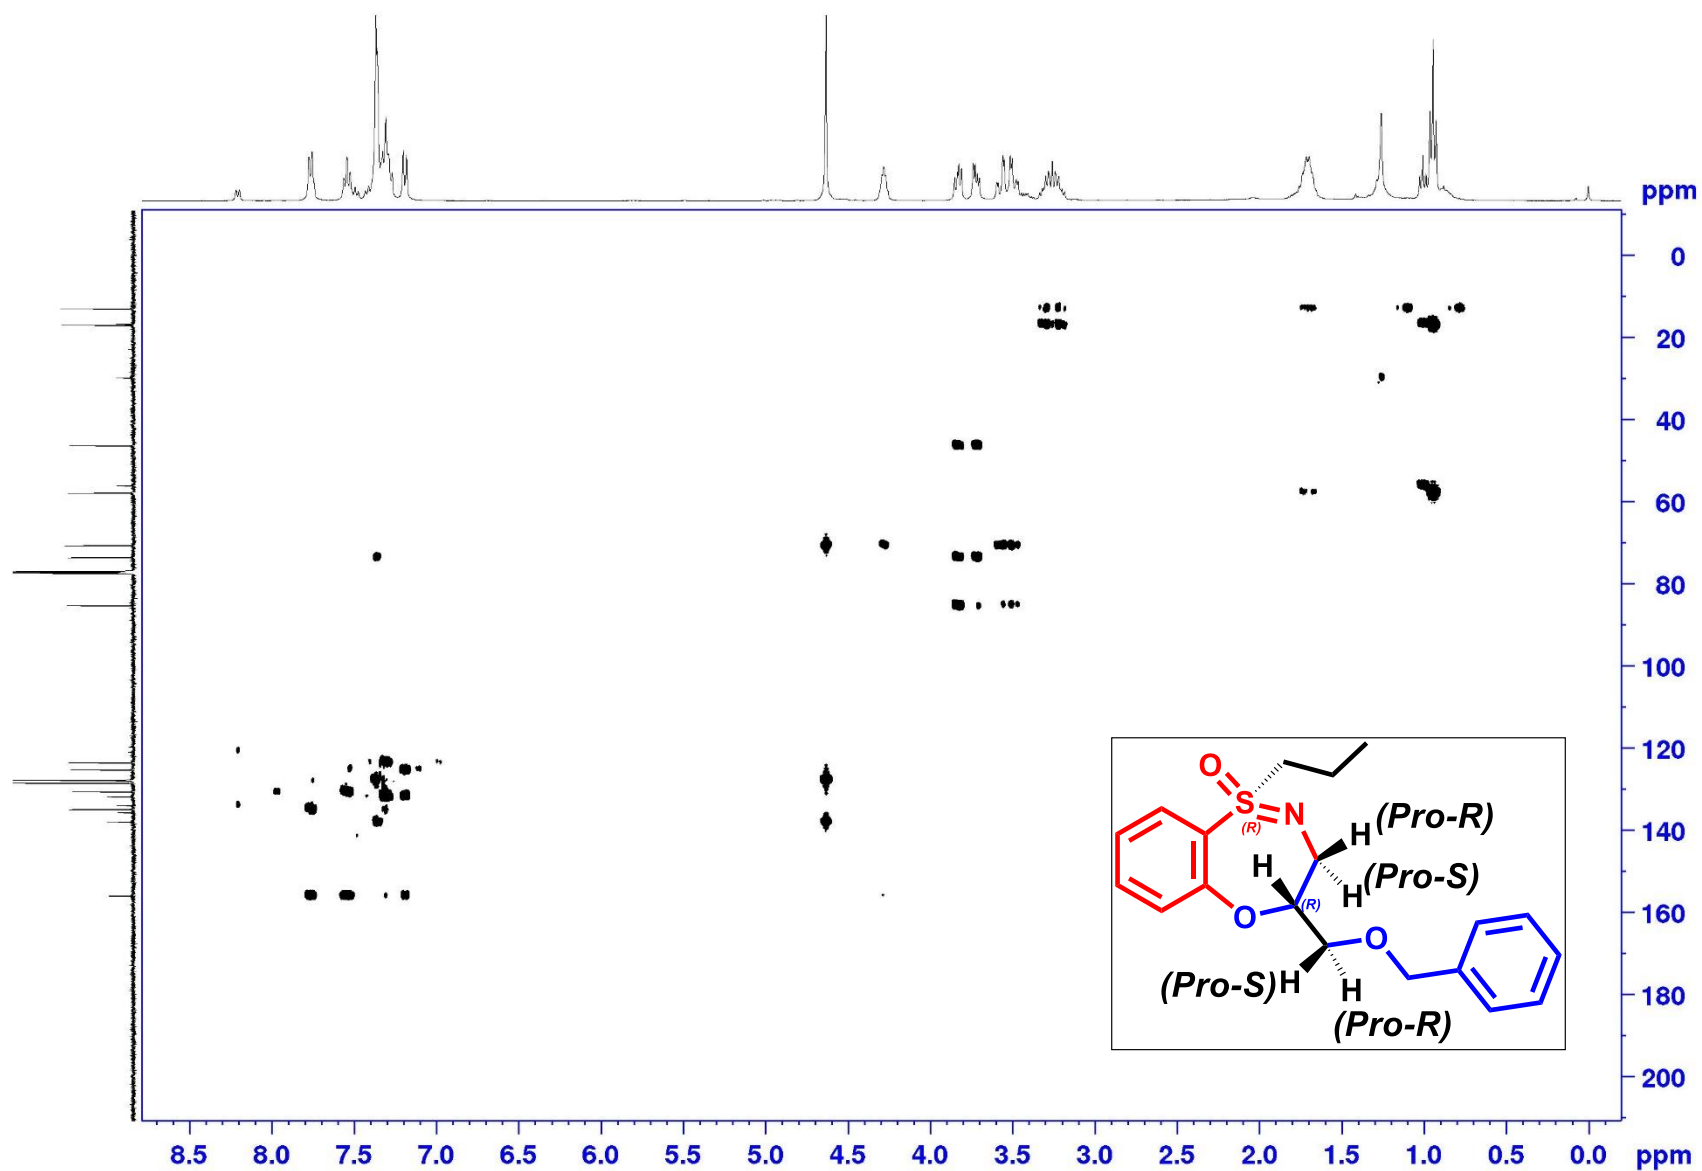

**Fig S-157:** HMBC Spectra of Compound (R,R)-4z (400 MHz, CDCl<sub>3</sub>)

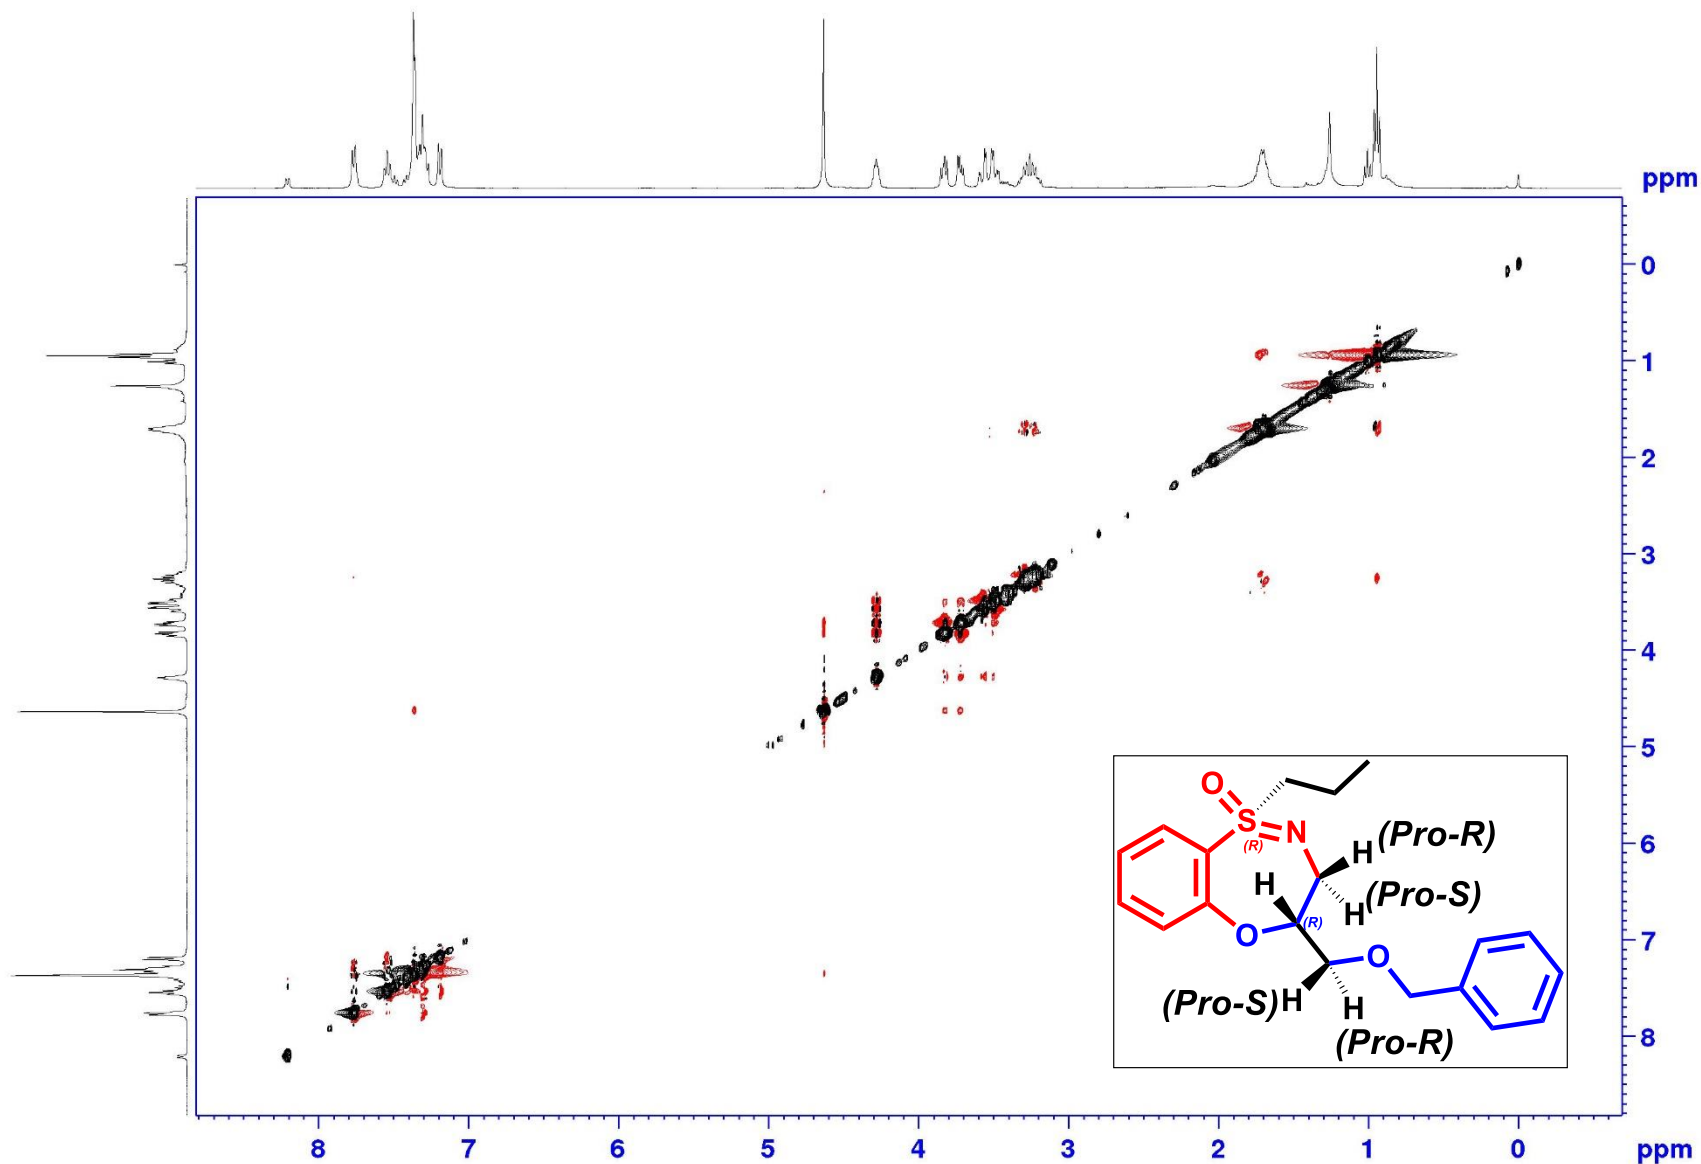

**Fig S-158:** NOESY Spectra of Compound (R,R)-4z (500 MHz, CDCl<sub>3</sub>)

|               |                  |             |             |                 |              |                        |                       |
|---------------|------------------|-------------|-------------|-----------------|--------------|------------------------|-----------------------|
| Sample Name   | Ref-3-1a         | Position    | Vial 12     | Instrument Name | Instrument 1 | User Name              |                       |
| Inj Vol       | 1                | InjPosition |             | SampleType      | Sample       | IRM Calibration Status | Some Ions Missed      |
| Data Filename | HRMS22I20APR12.d | ACQ Method  | ISOCRATIC.m | Comment         |              | Acquired Time          | 4/20/2022 12:01:29 PM |

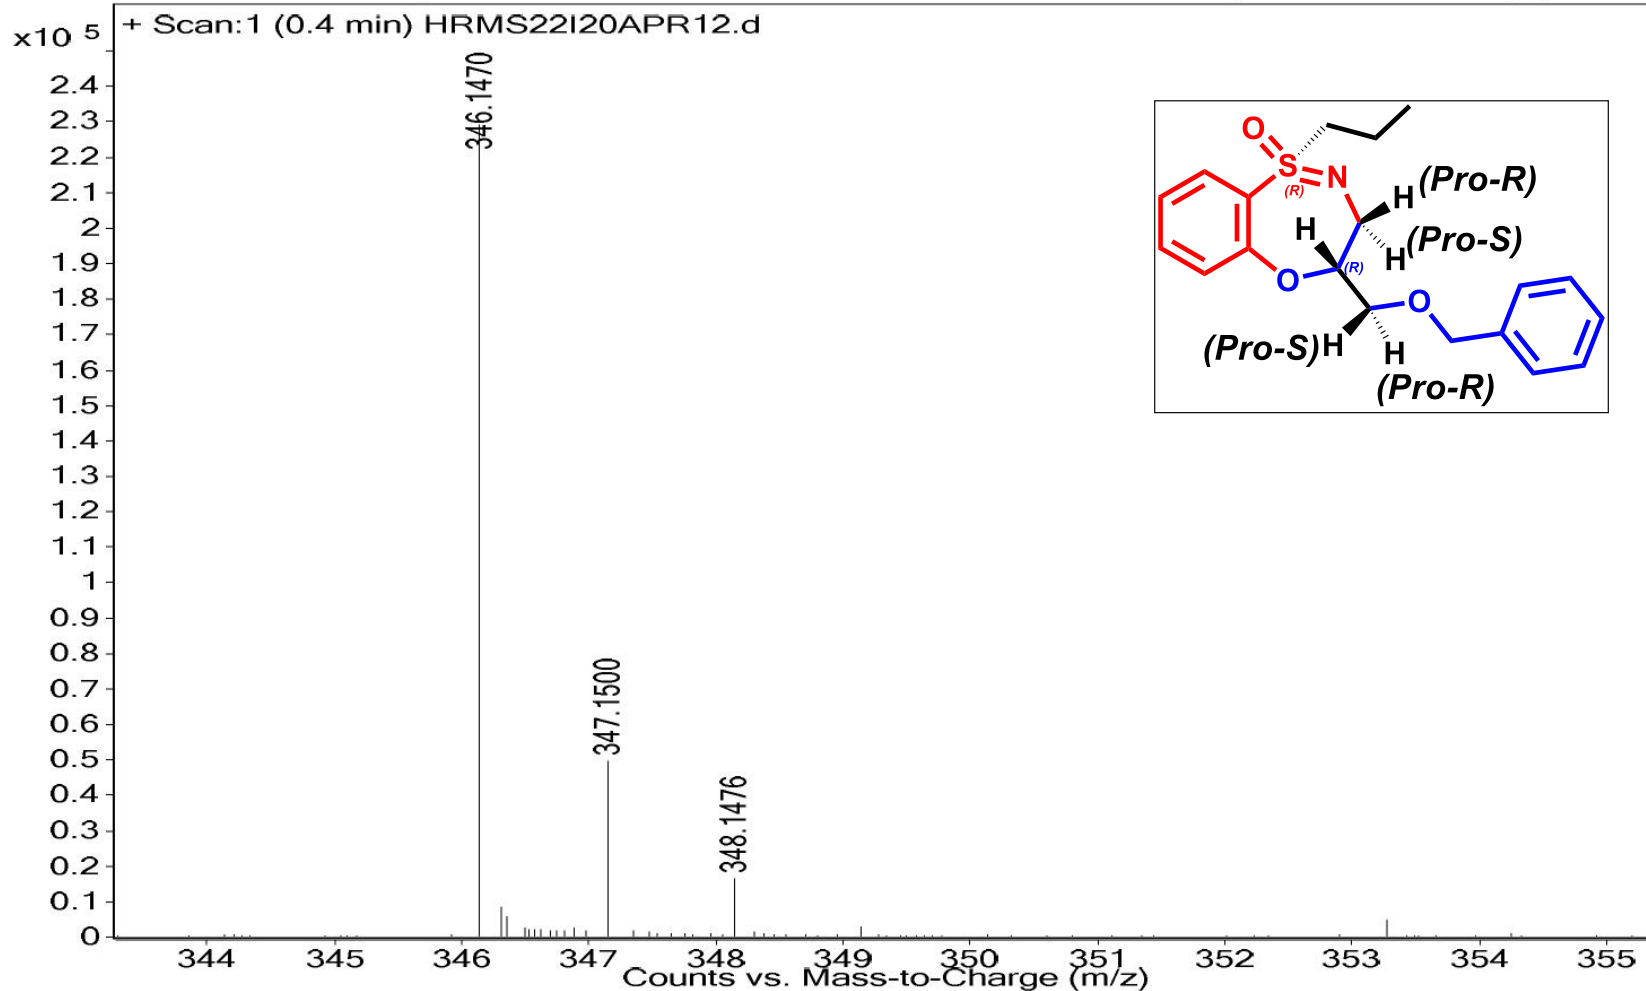

**Fig S-159:** HRMS report of Compound (*R,R*)- **4z**

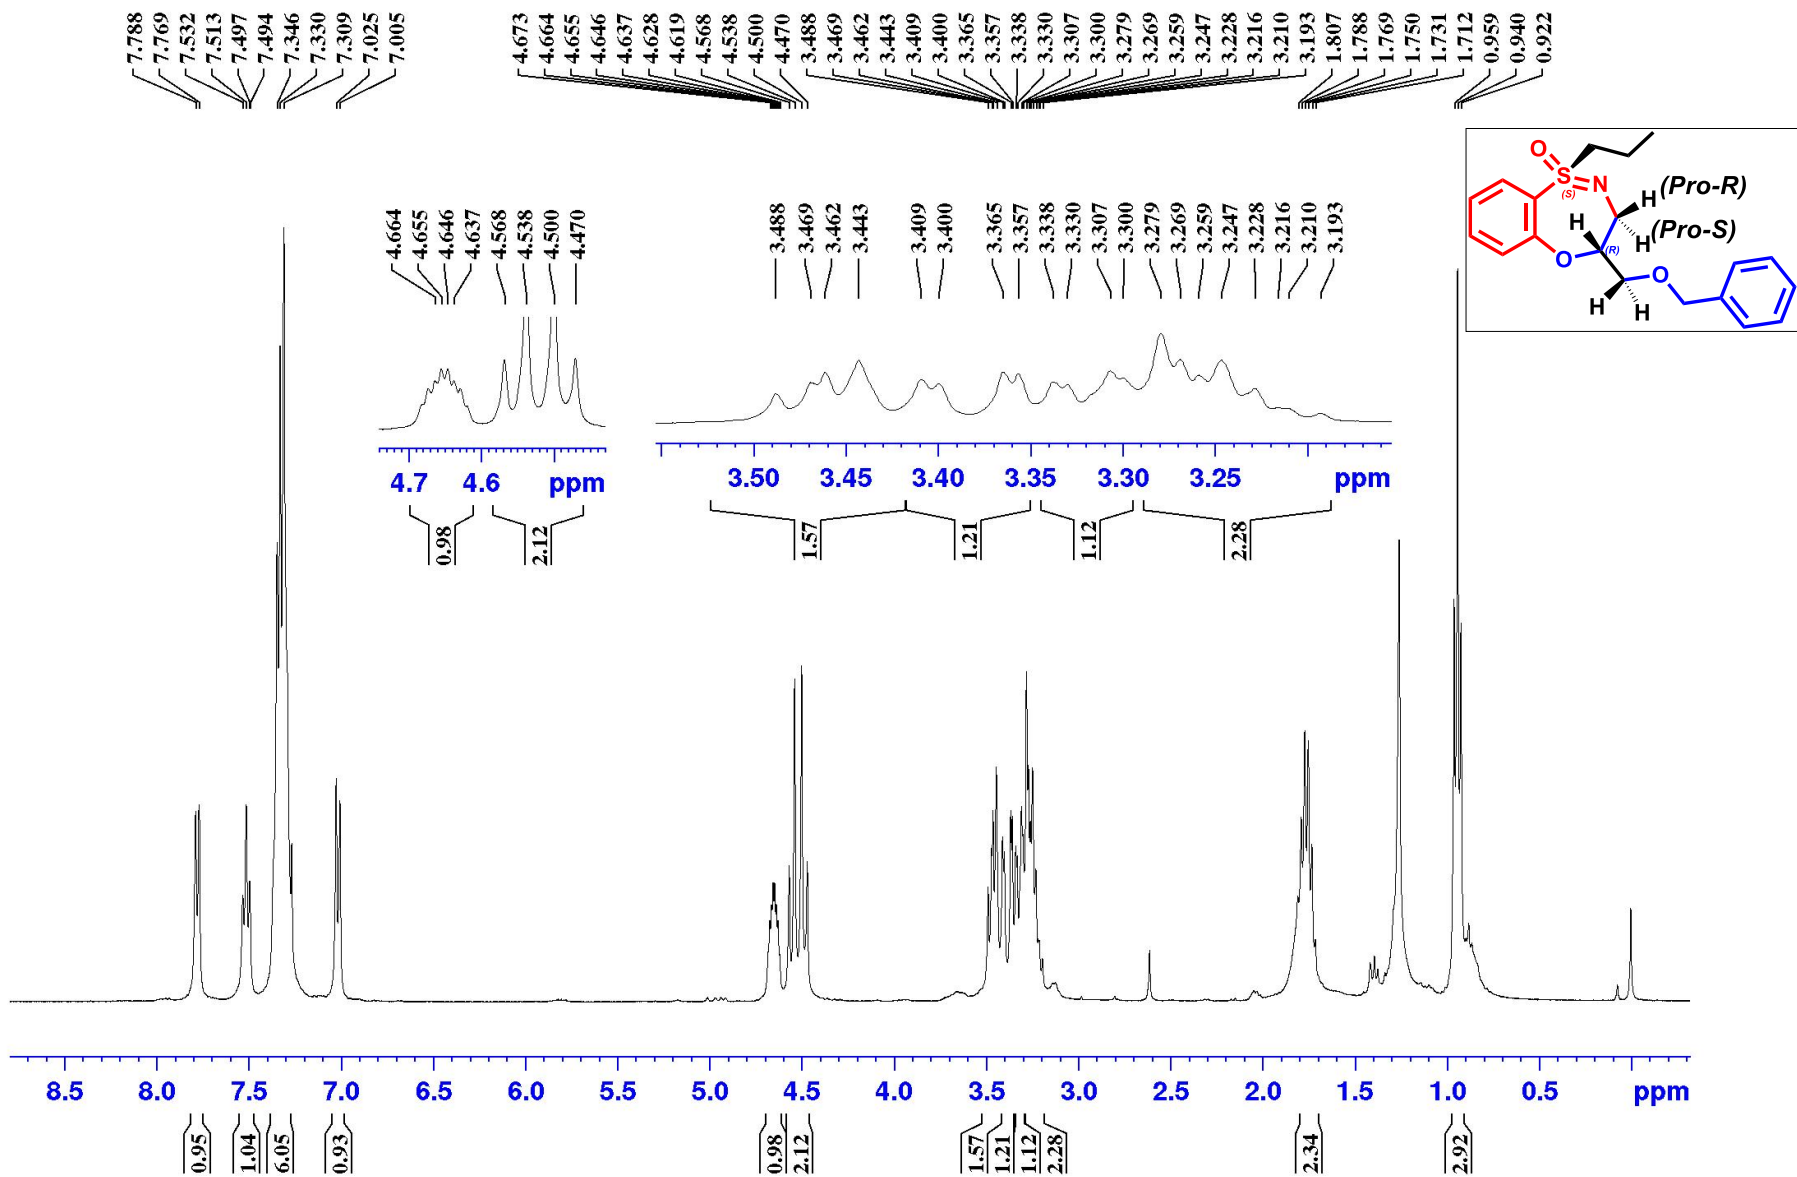

**Fig S-160:**  $^1\text{H}$  NMR Spectra of Compound  $(R,S)$ -4z' (400 MHz,  $\text{CDCl}_3$ )

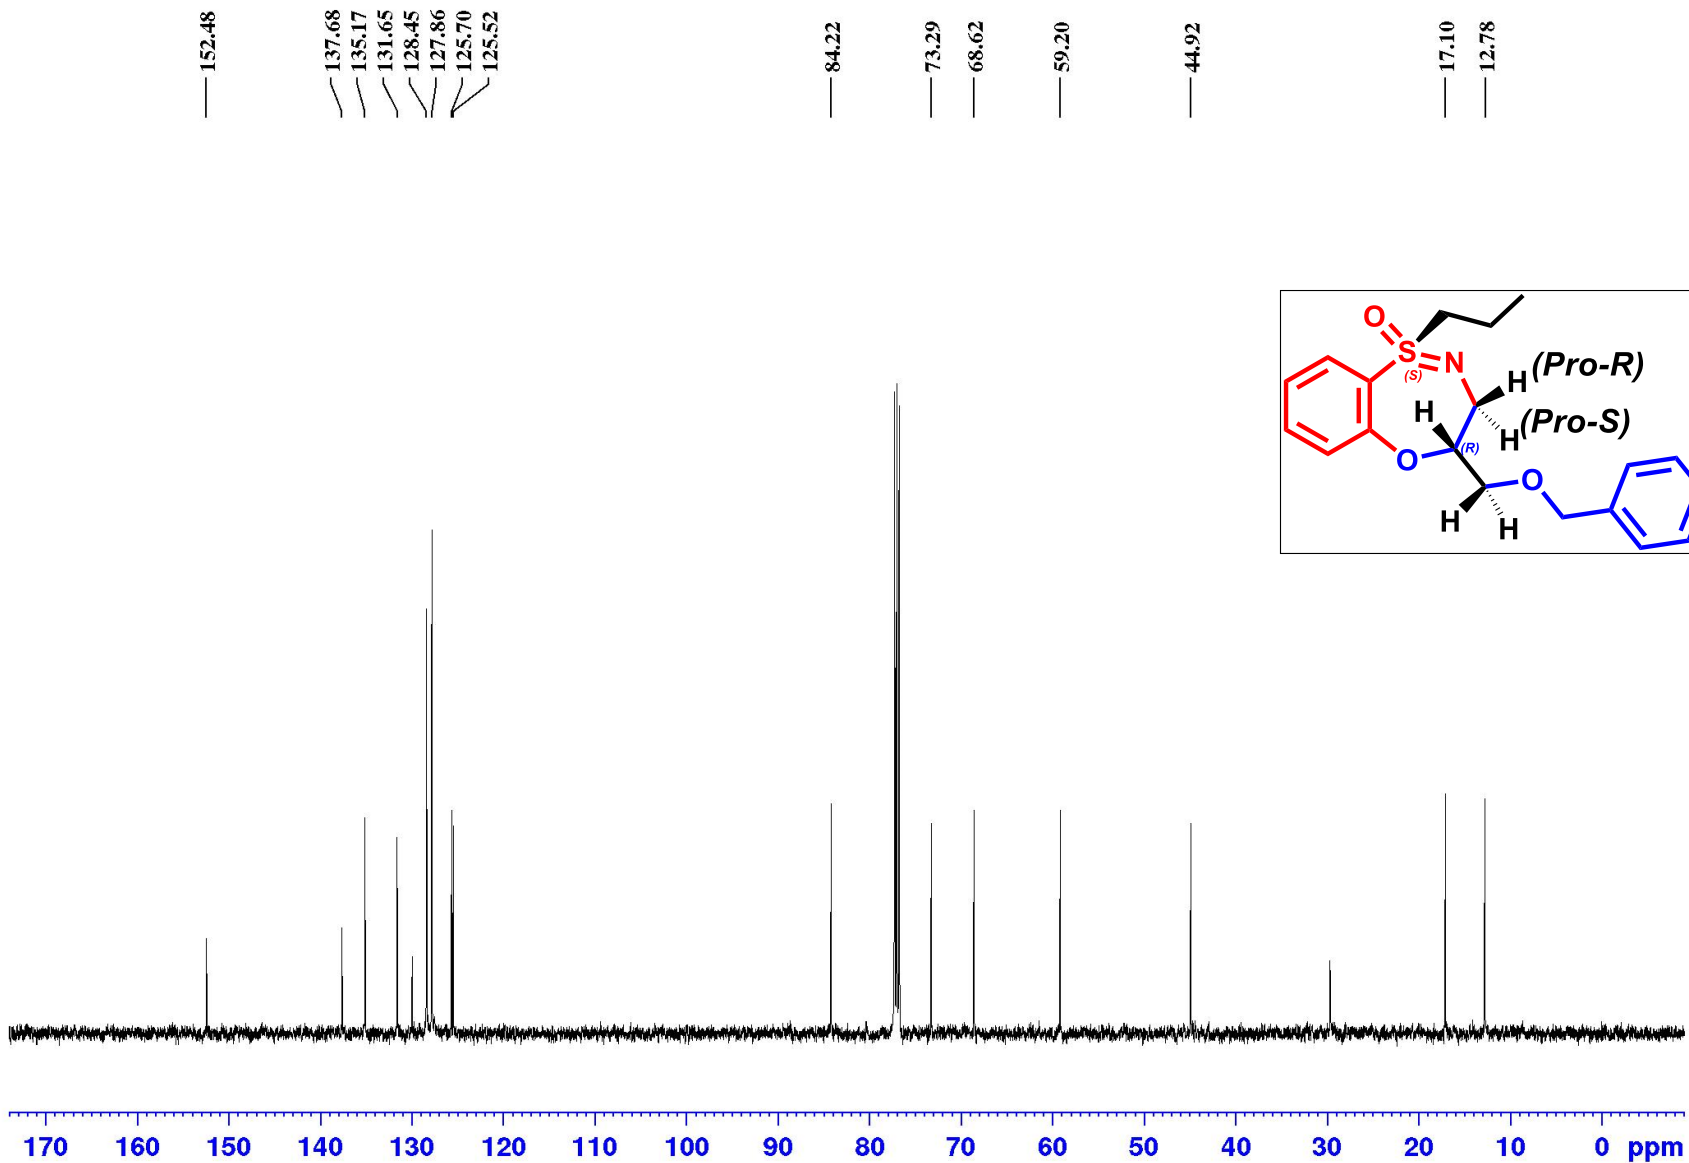

**Fig S-161:** <sup>13</sup>C NMR Spectra of Compound (*R,S*)-4z' (125MHz, CDCl<sub>3</sub>)

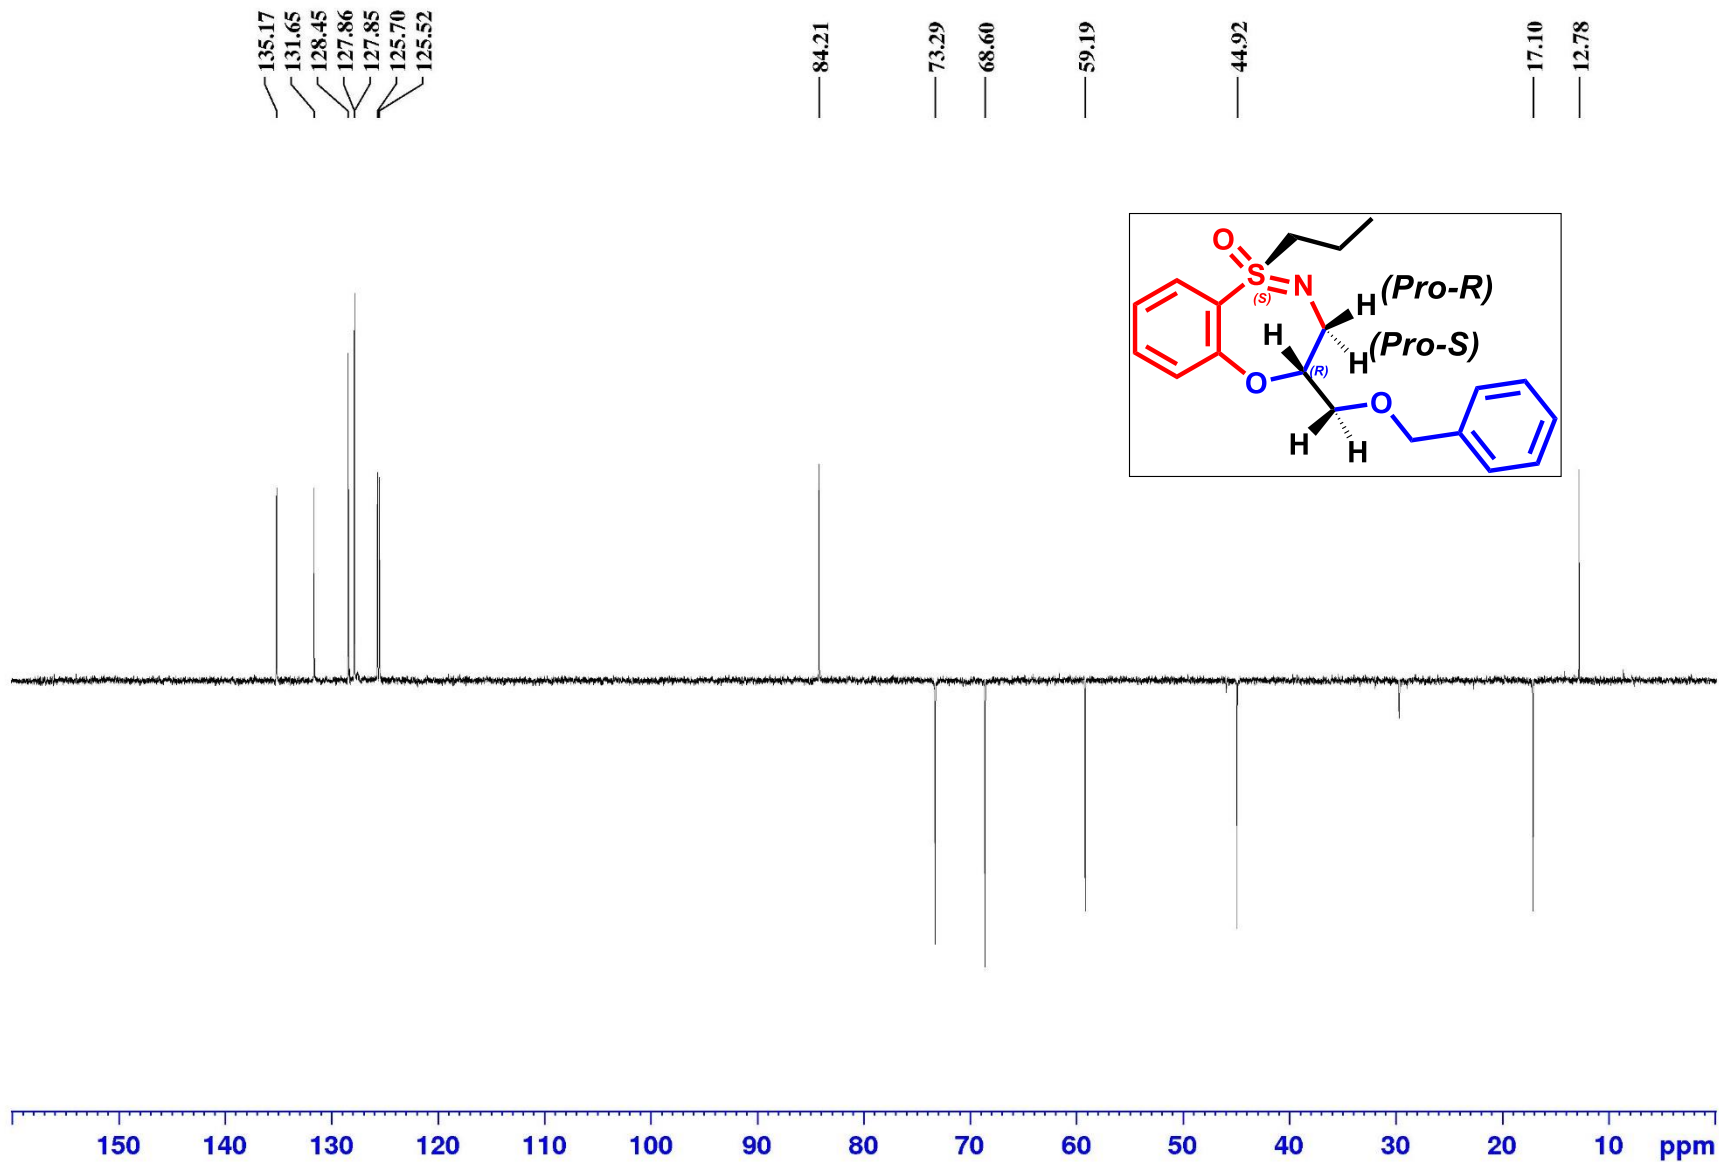

**Fig S-162:** DEPT-135 Spectra of Compound **(R,S)-4z'** (100 MHz,  $\text{CDCl}_3$ )

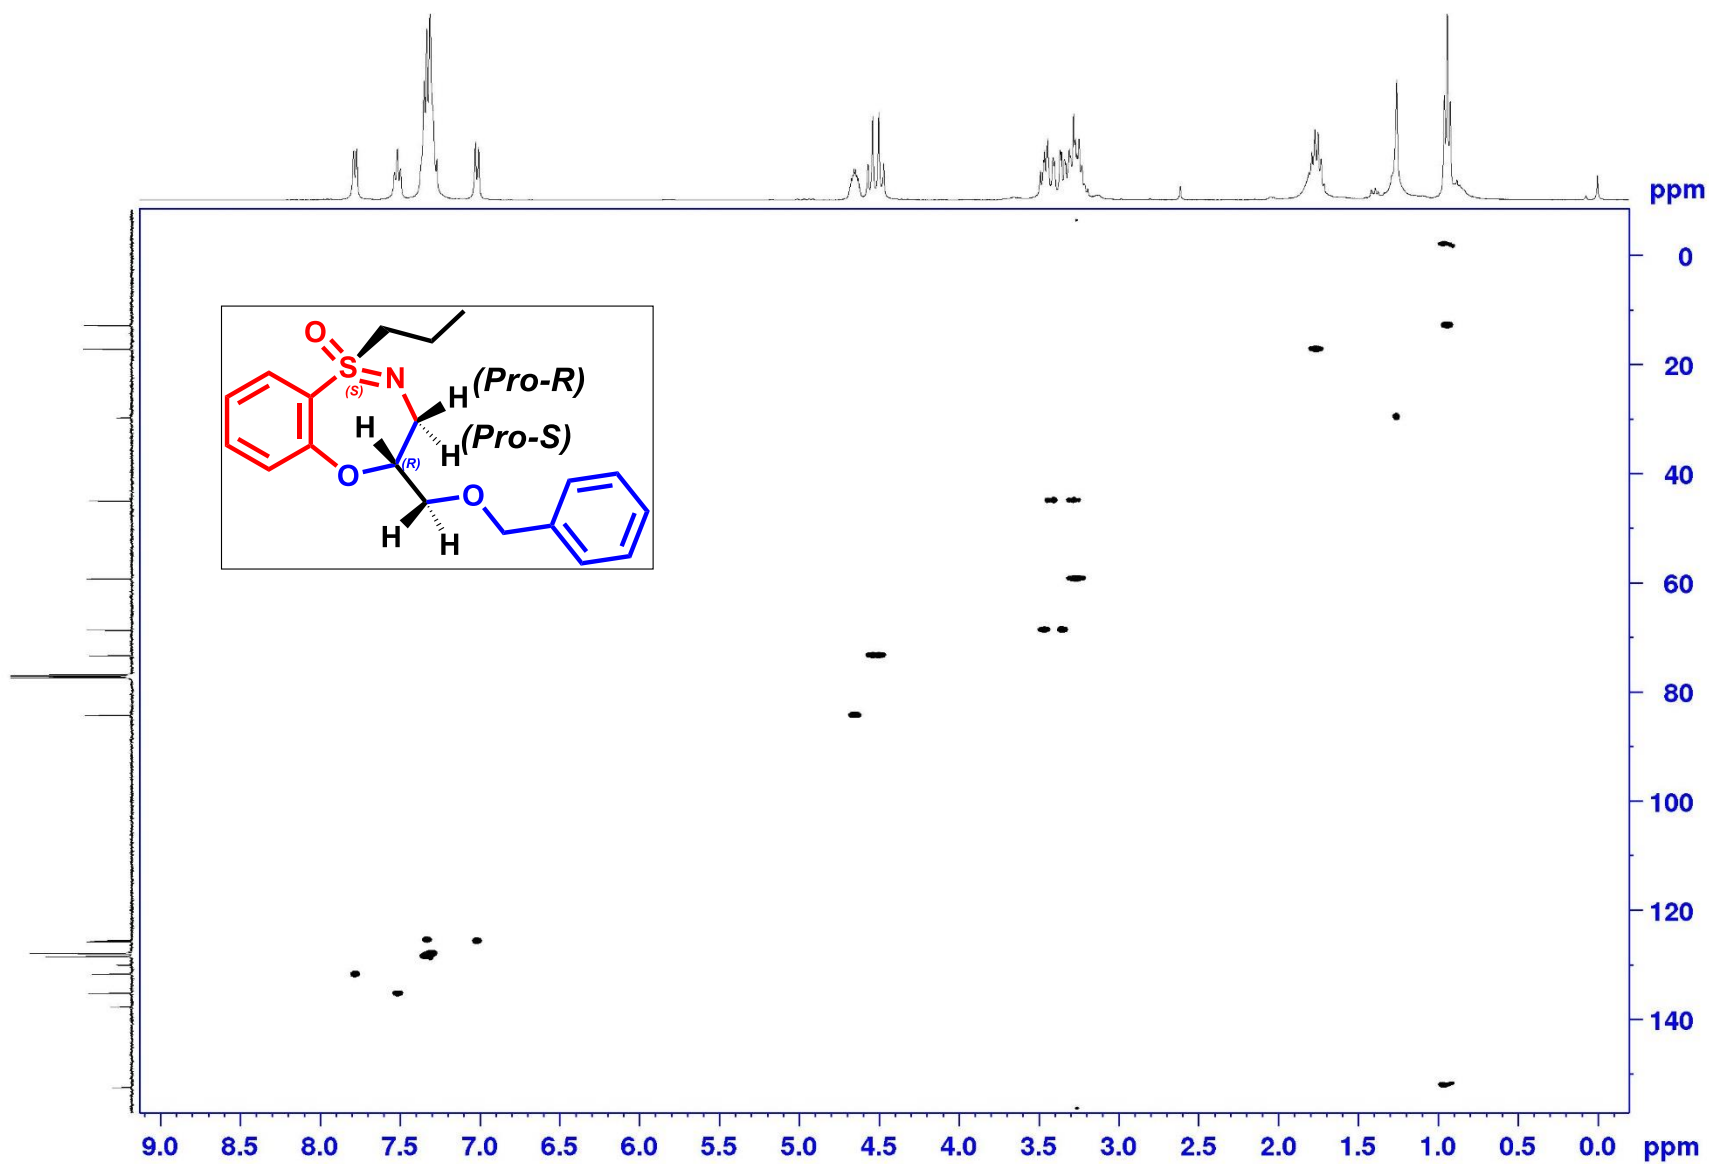

**Fig S-163:** COSY Spectra of Compound (*R,S*)-4z' (400 MHz, CDCl<sub>3</sub>)



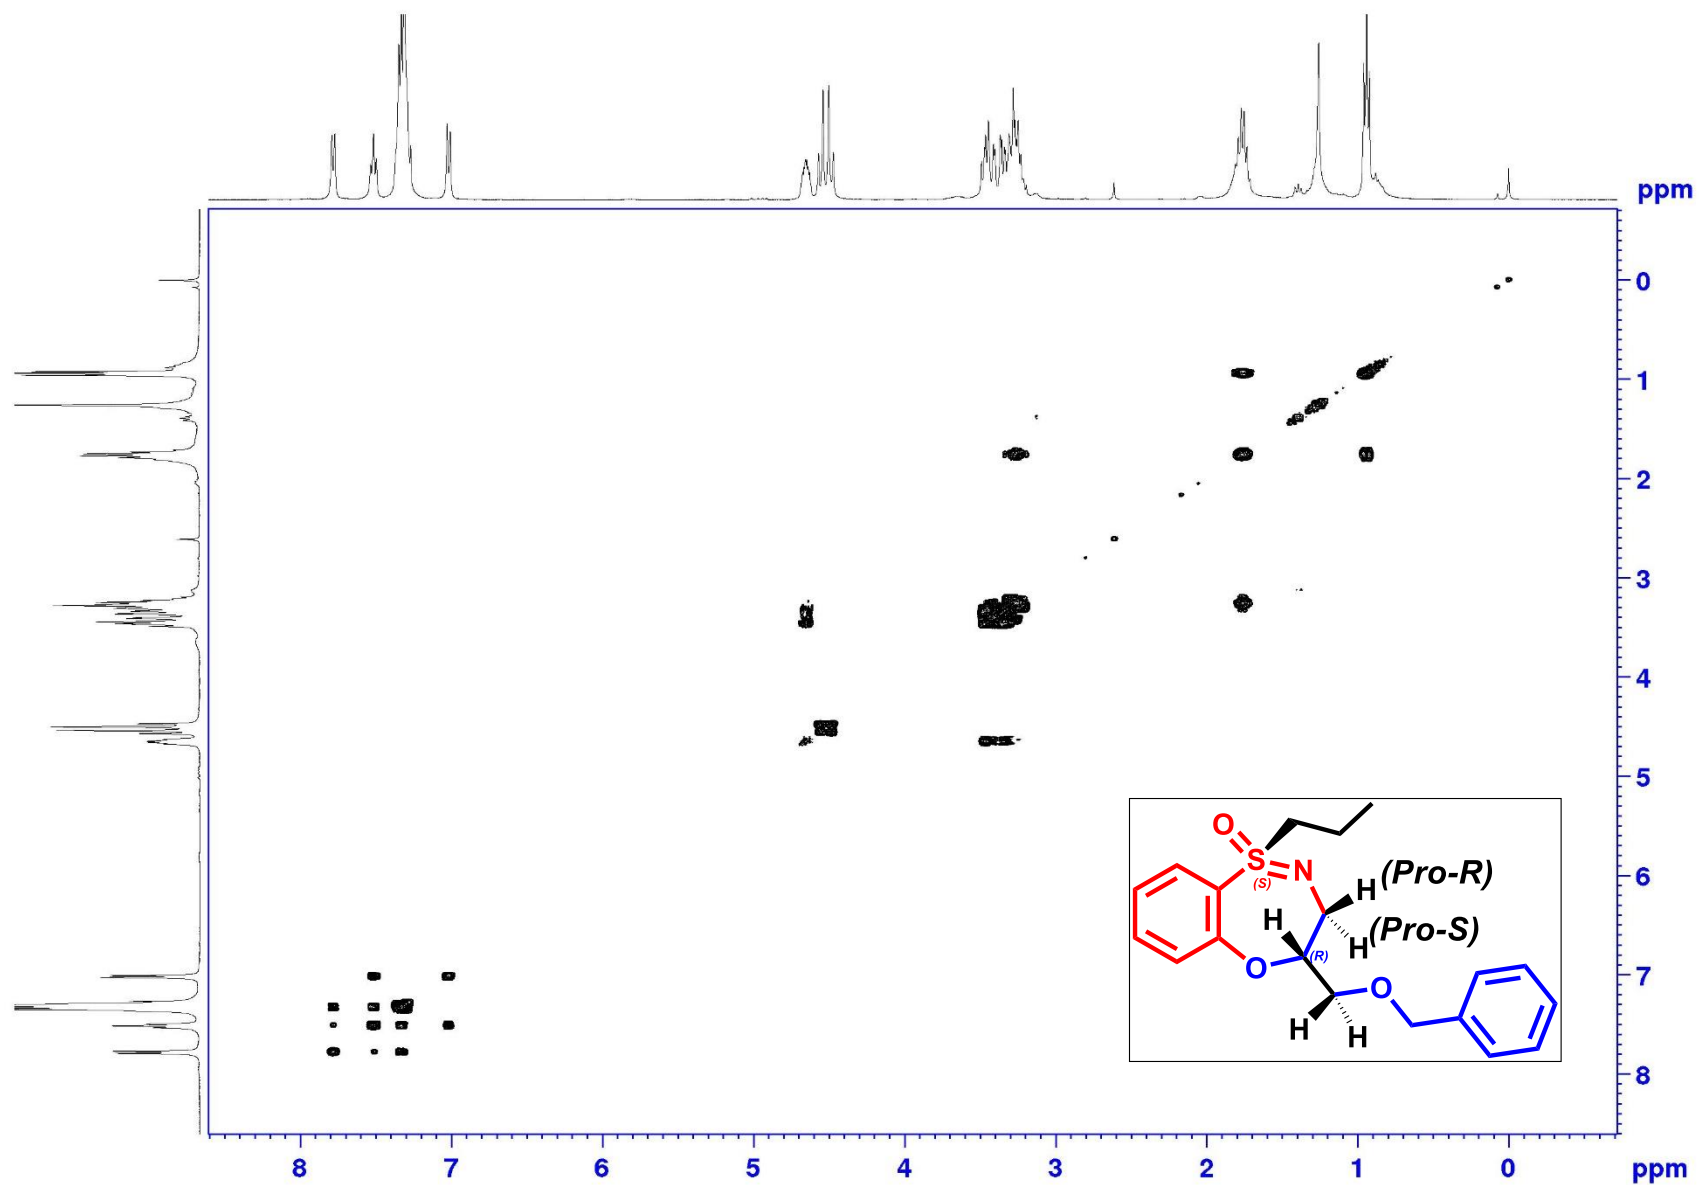

**Fig S-164:** HSQC Spectra of Compound (*R,S*)-4z' (400 MHz, CDCl<sub>3</sub>)

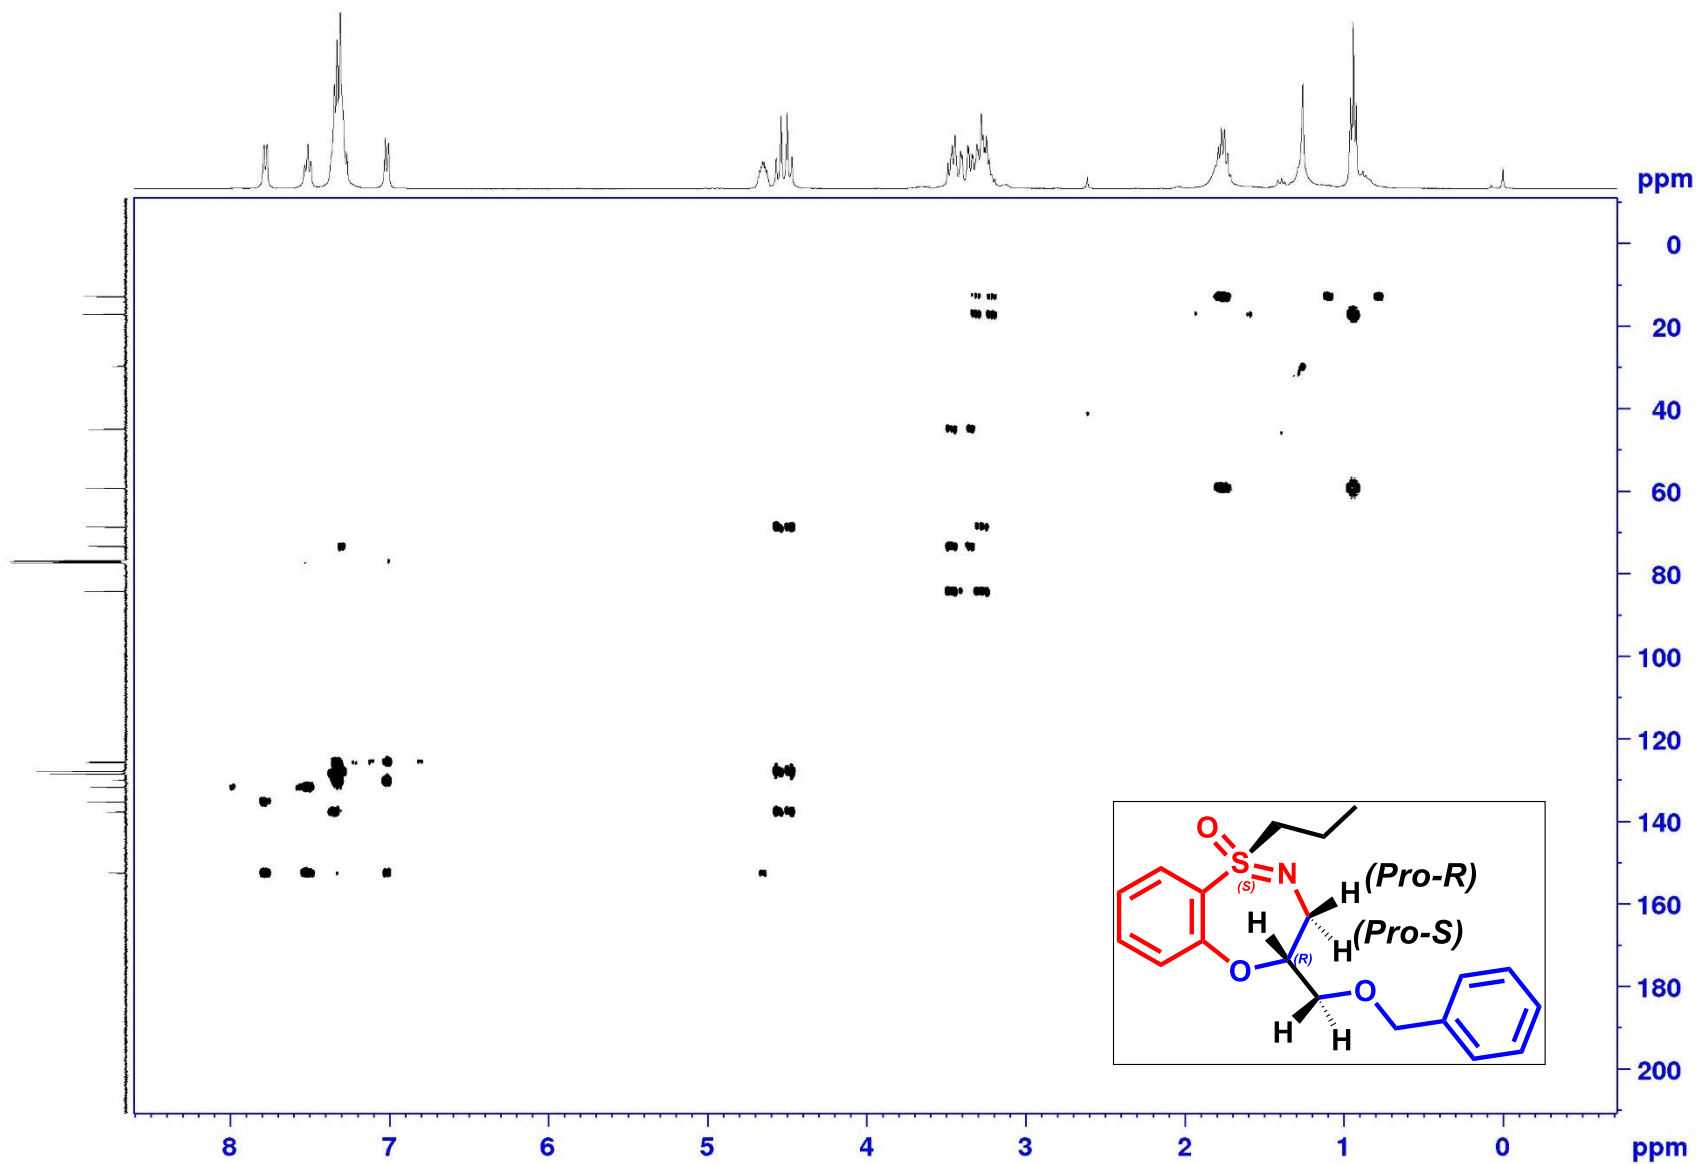

**Fig S-165:** HMBC Spectra of Compound (*R,S*)-4z' (400 MHz, CDCl<sub>3</sub>)

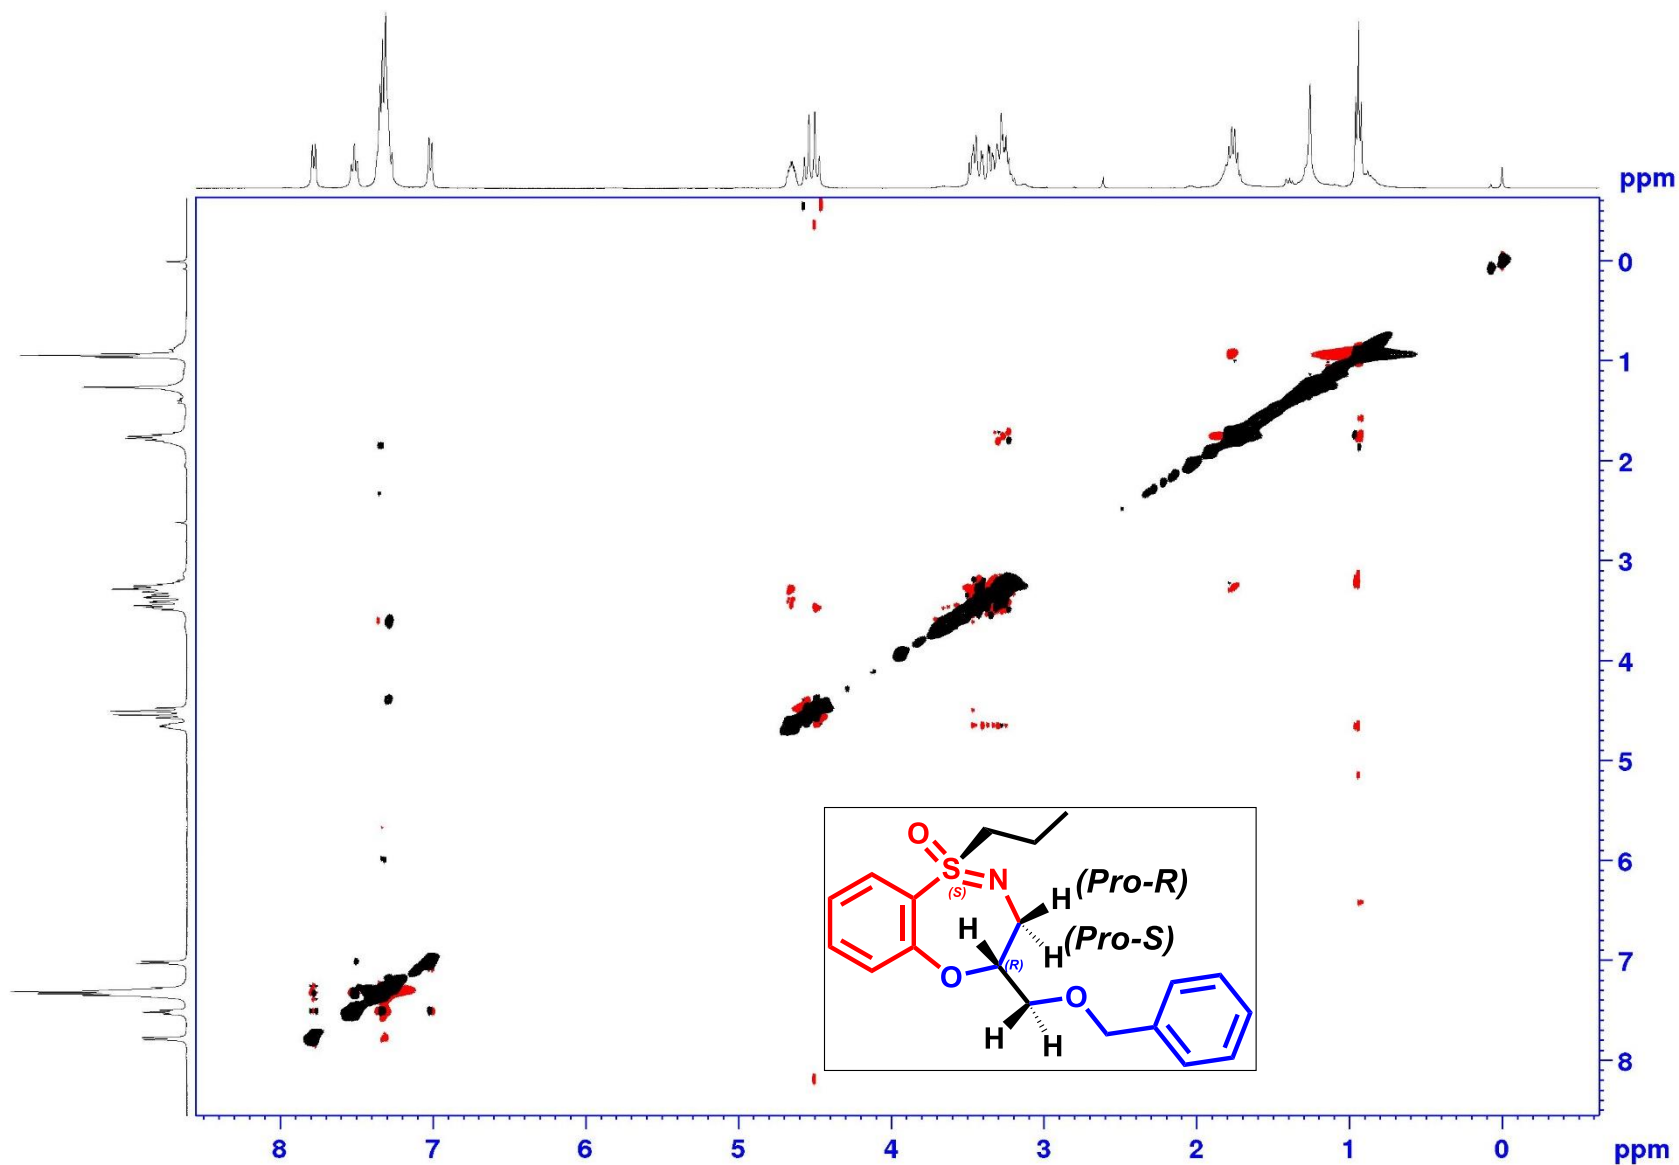

**Fig S-166:** NOESY Spectra of Compound (R,S)-4z' (500 MHz, CDCl<sub>3</sub>)

|               |                  |             |             |                 |              |                        |                       |
|---------------|------------------|-------------|-------------|-----------------|--------------|------------------------|-----------------------|
| Sample Name   | Ref-3-1b         | Position    | Vial 13     | Instrument Name | Instrument 1 | User Name              |                       |
| Inj Vol       | 1                | InjPosition |             | SampleType      | Sample       | IRM Calibration Status | Some Ions Missed      |
| Data Filename | HRMS22I20APR13.d | ACQ Method  | ISOCRATIC.m | Comment         |              | Acquired Time          | 4/20/2022 12:04:04 PM |

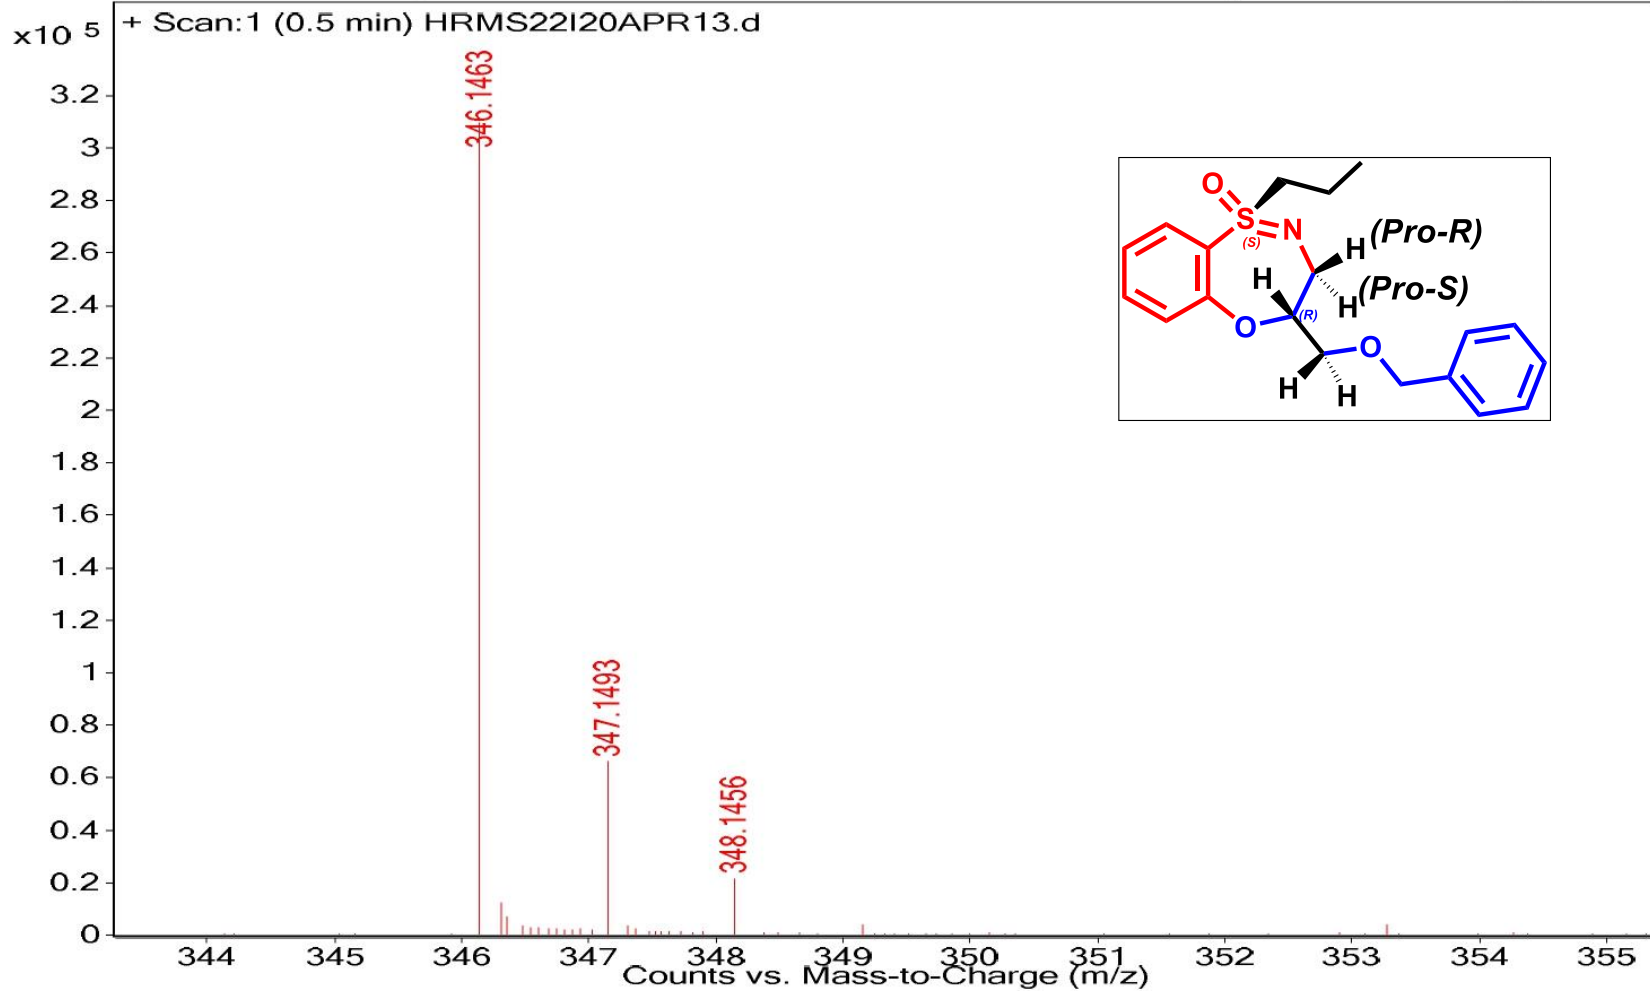

**Fig S-167:** HRMS report of Compound (R,S)-4z'

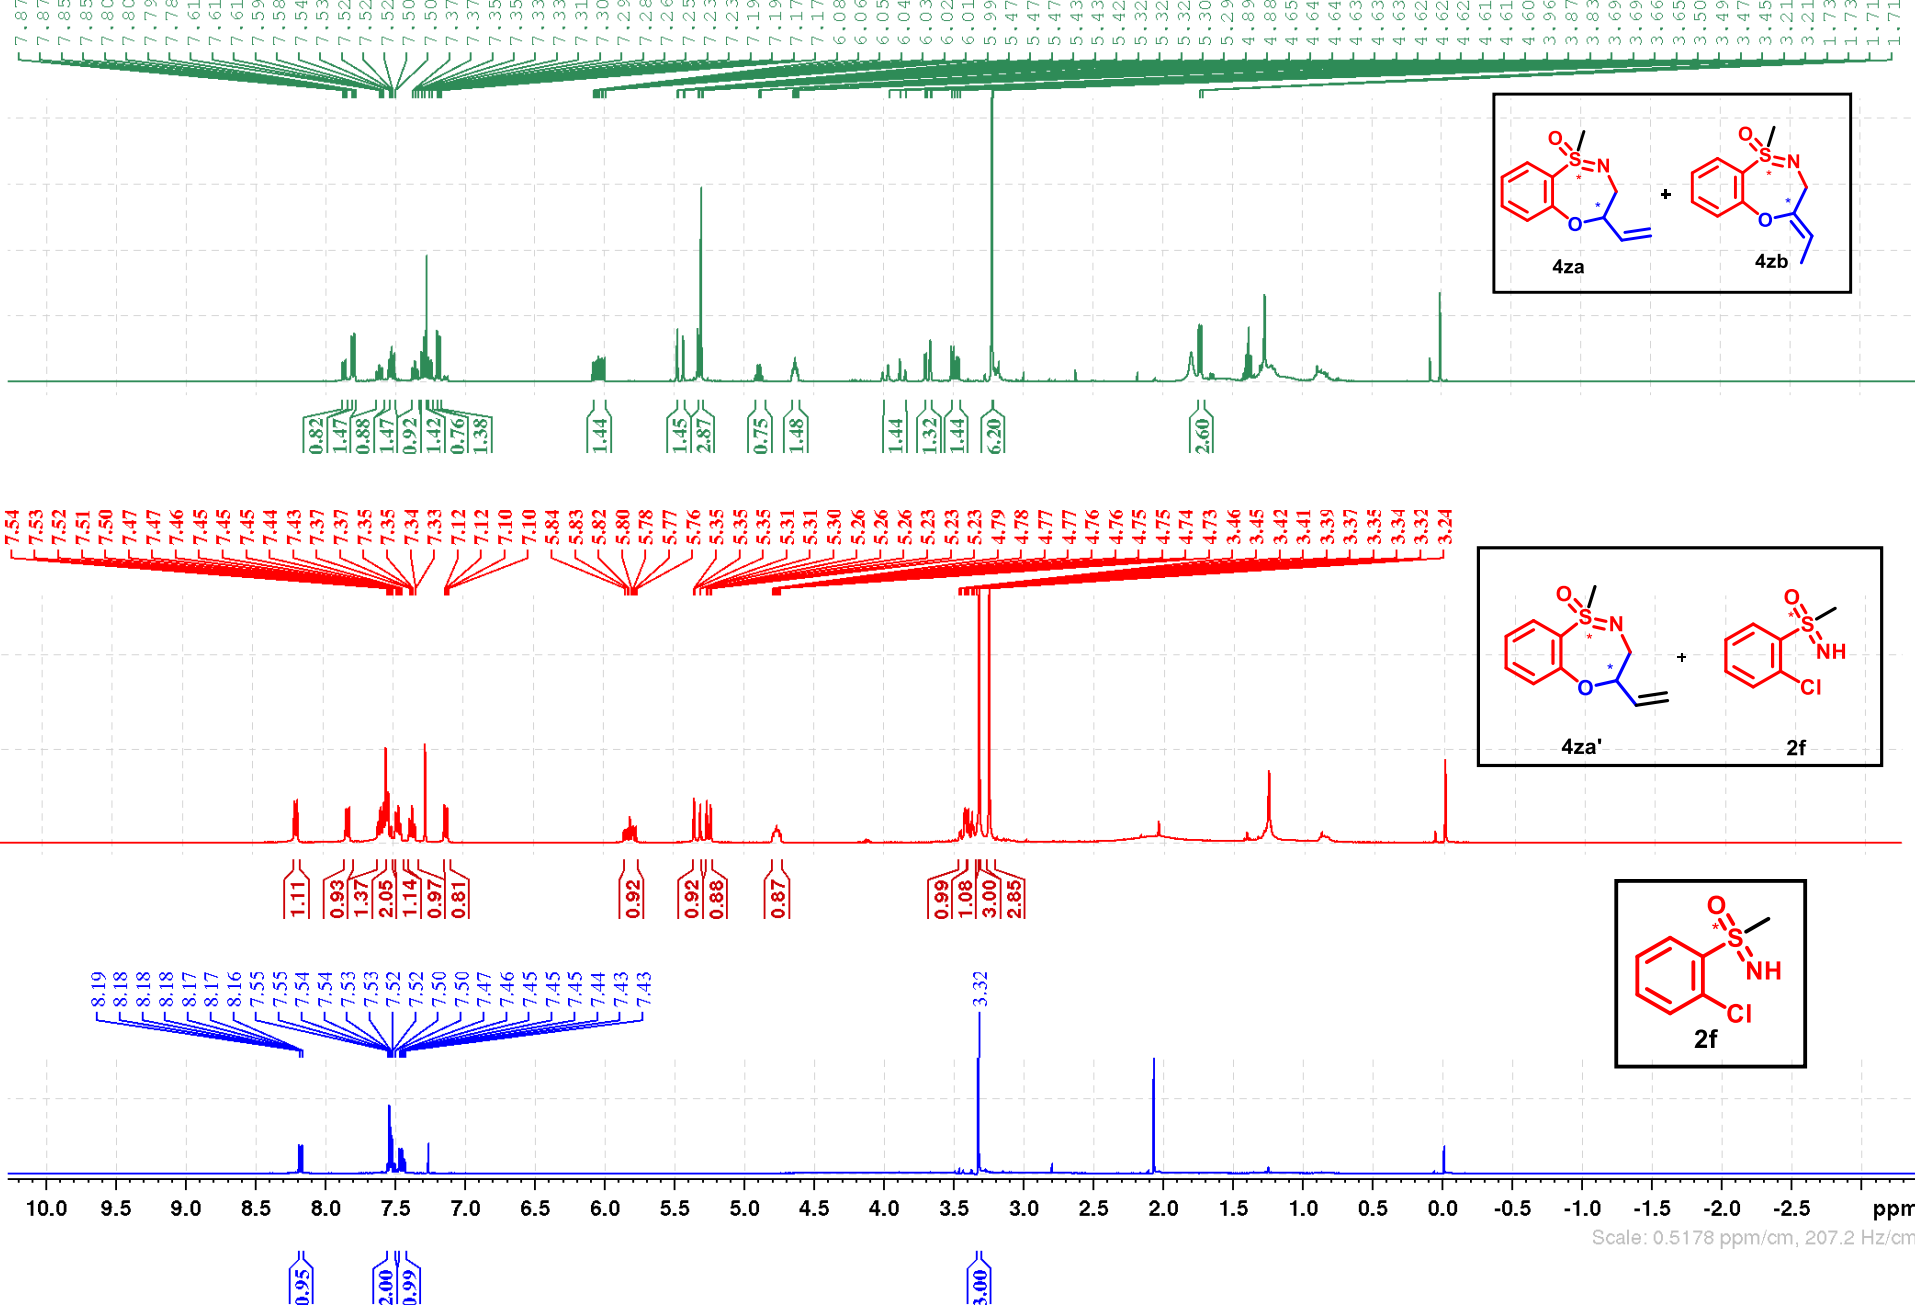

**Fig S-168:**  $^1\text{H}$  NMR Spectra interpretation of Compound **4za**, **4za'**, **4zb** by correlated with **2f** (400 MHz,  $\text{CDCl}_3$ )

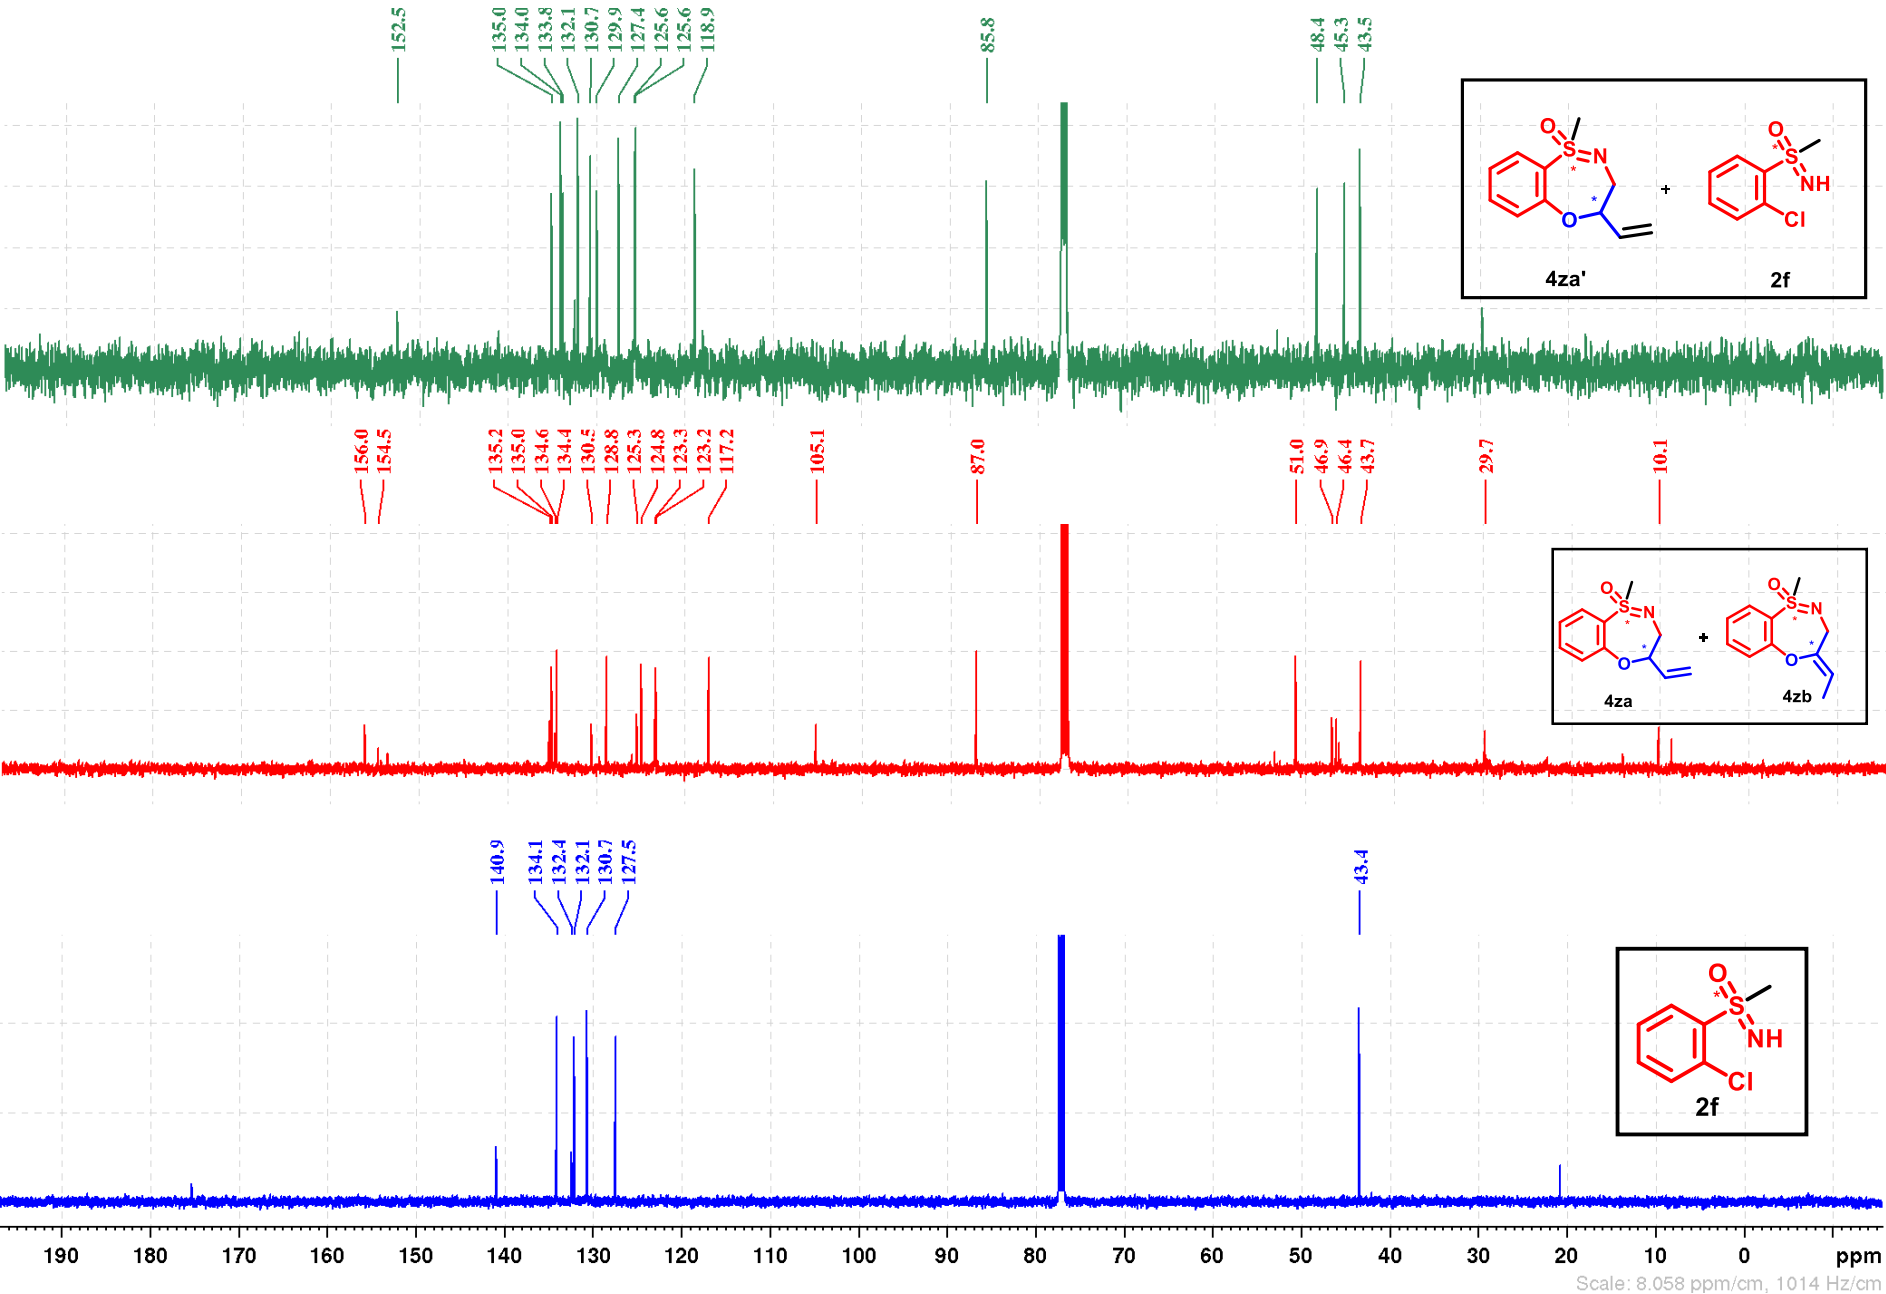

**Fig S-169:**  $^{13}\text{C}$  NMR Spectra interpretation of Compound **4za**, **4za'**, **4zb** by correlated with **2f** (400 MHz,  $\text{CDCl}_3$ )

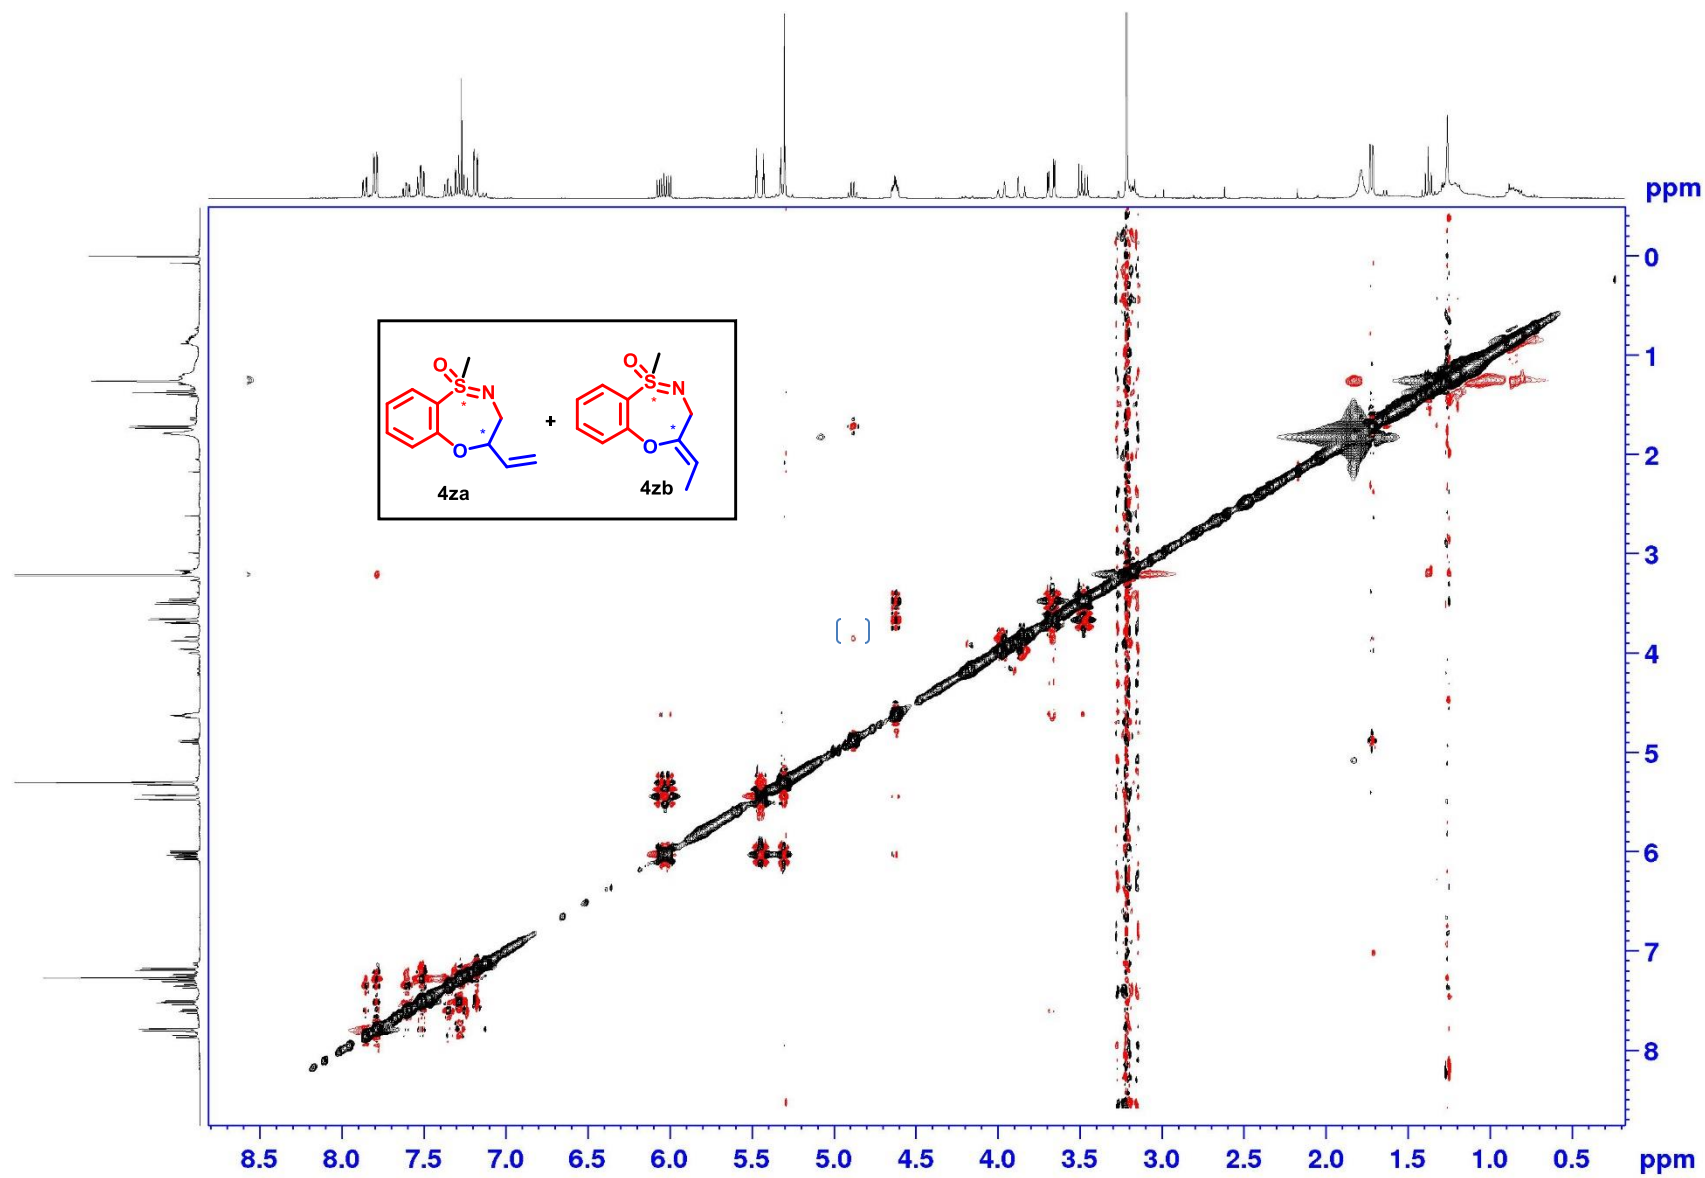

**Fig S-170: NOESY Spectra of Compound 4za+4zb (500 MHz, CDCl<sub>3</sub>)**

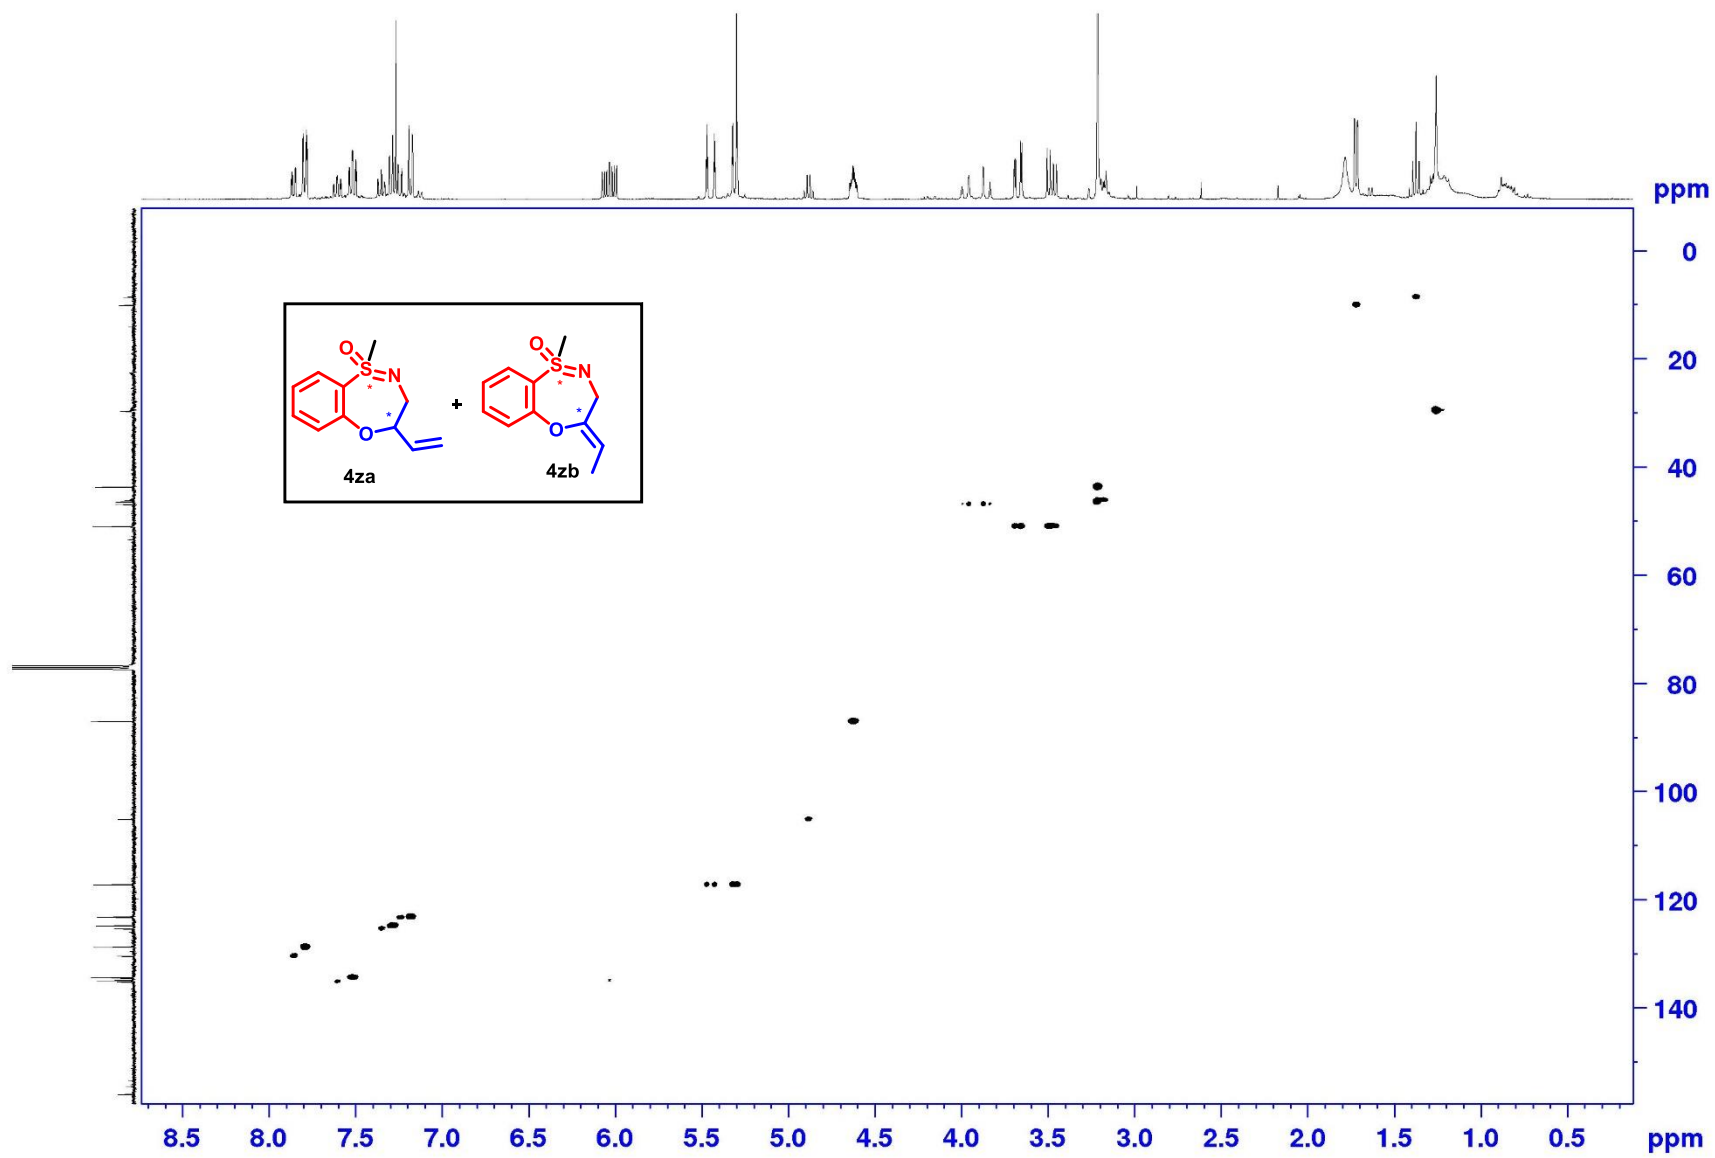

**Fig S-171: HSQC Spectra of Compound 4za+4zb (400 MHz,  $\text{CDCl}_3$ )**



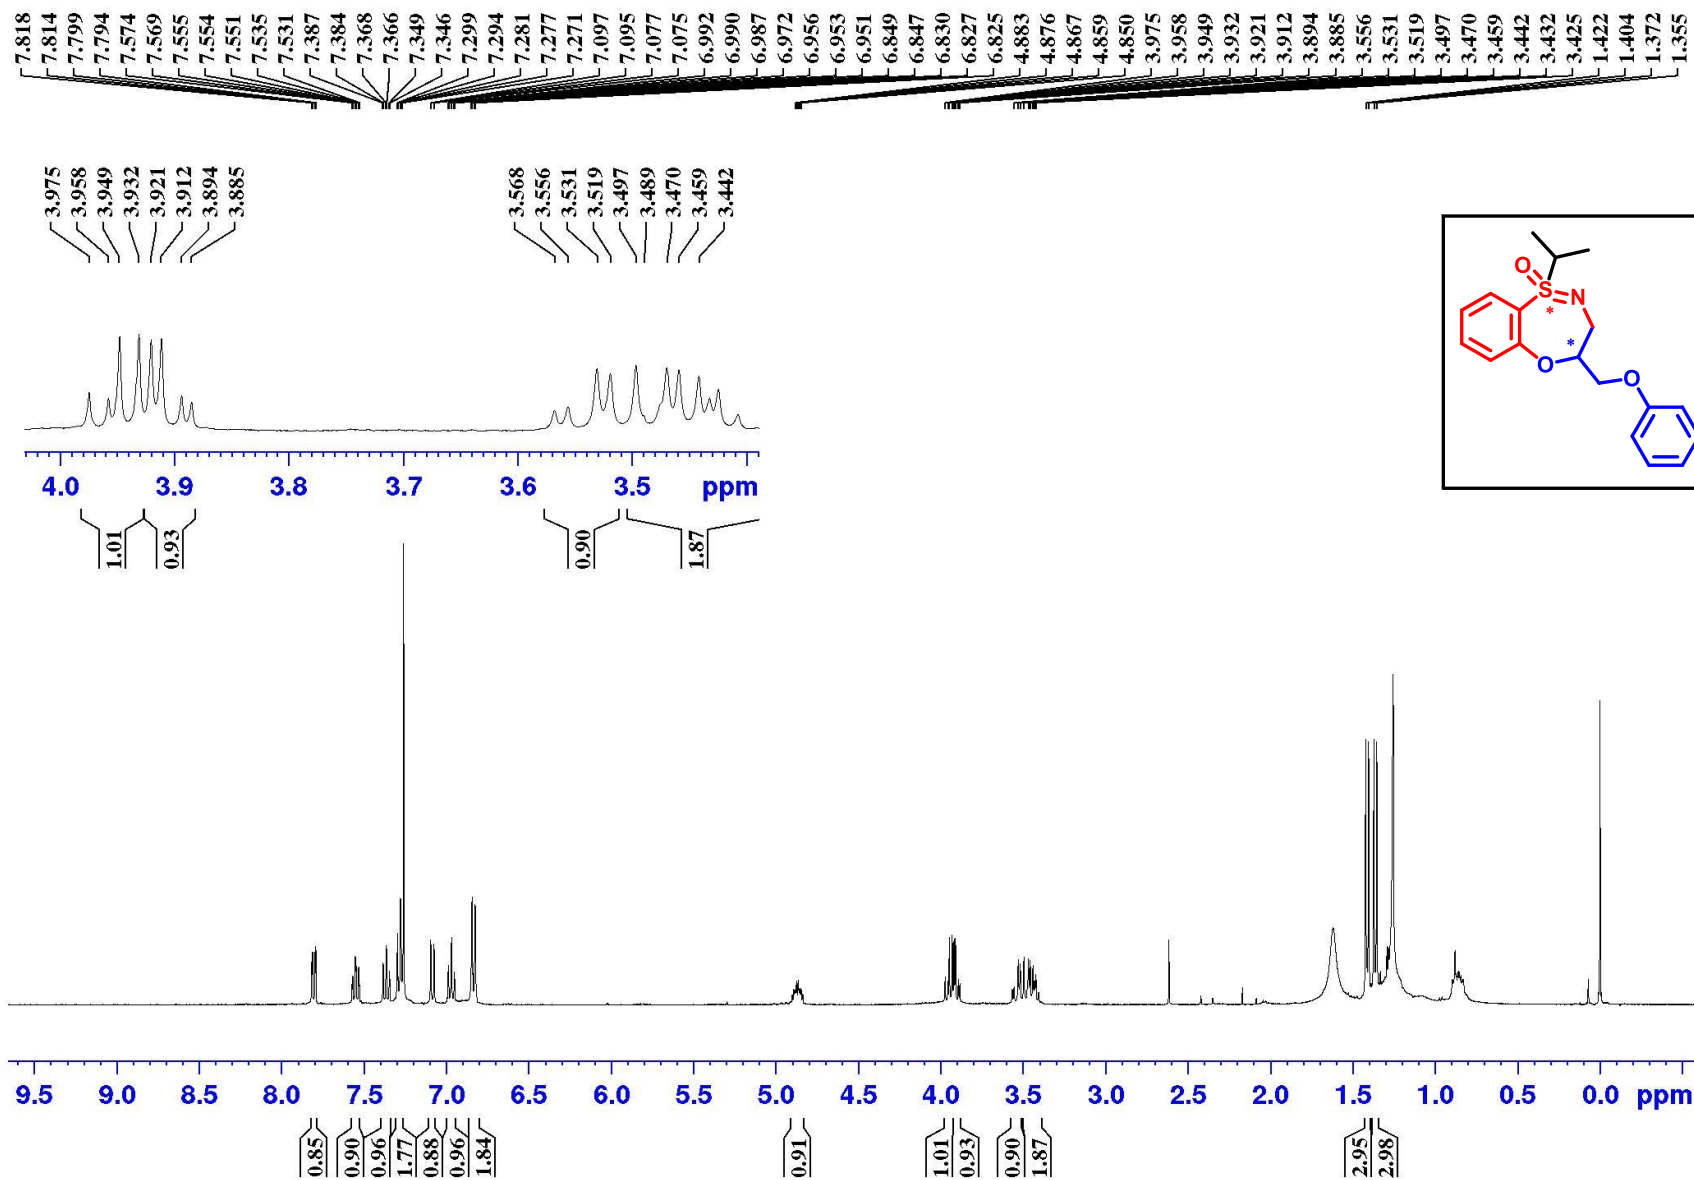

**Fig S-172:**  $^1\text{H}$  NMR Spectra of Compound 4zc (400 MHz,  $\text{CDCl}_3$ )

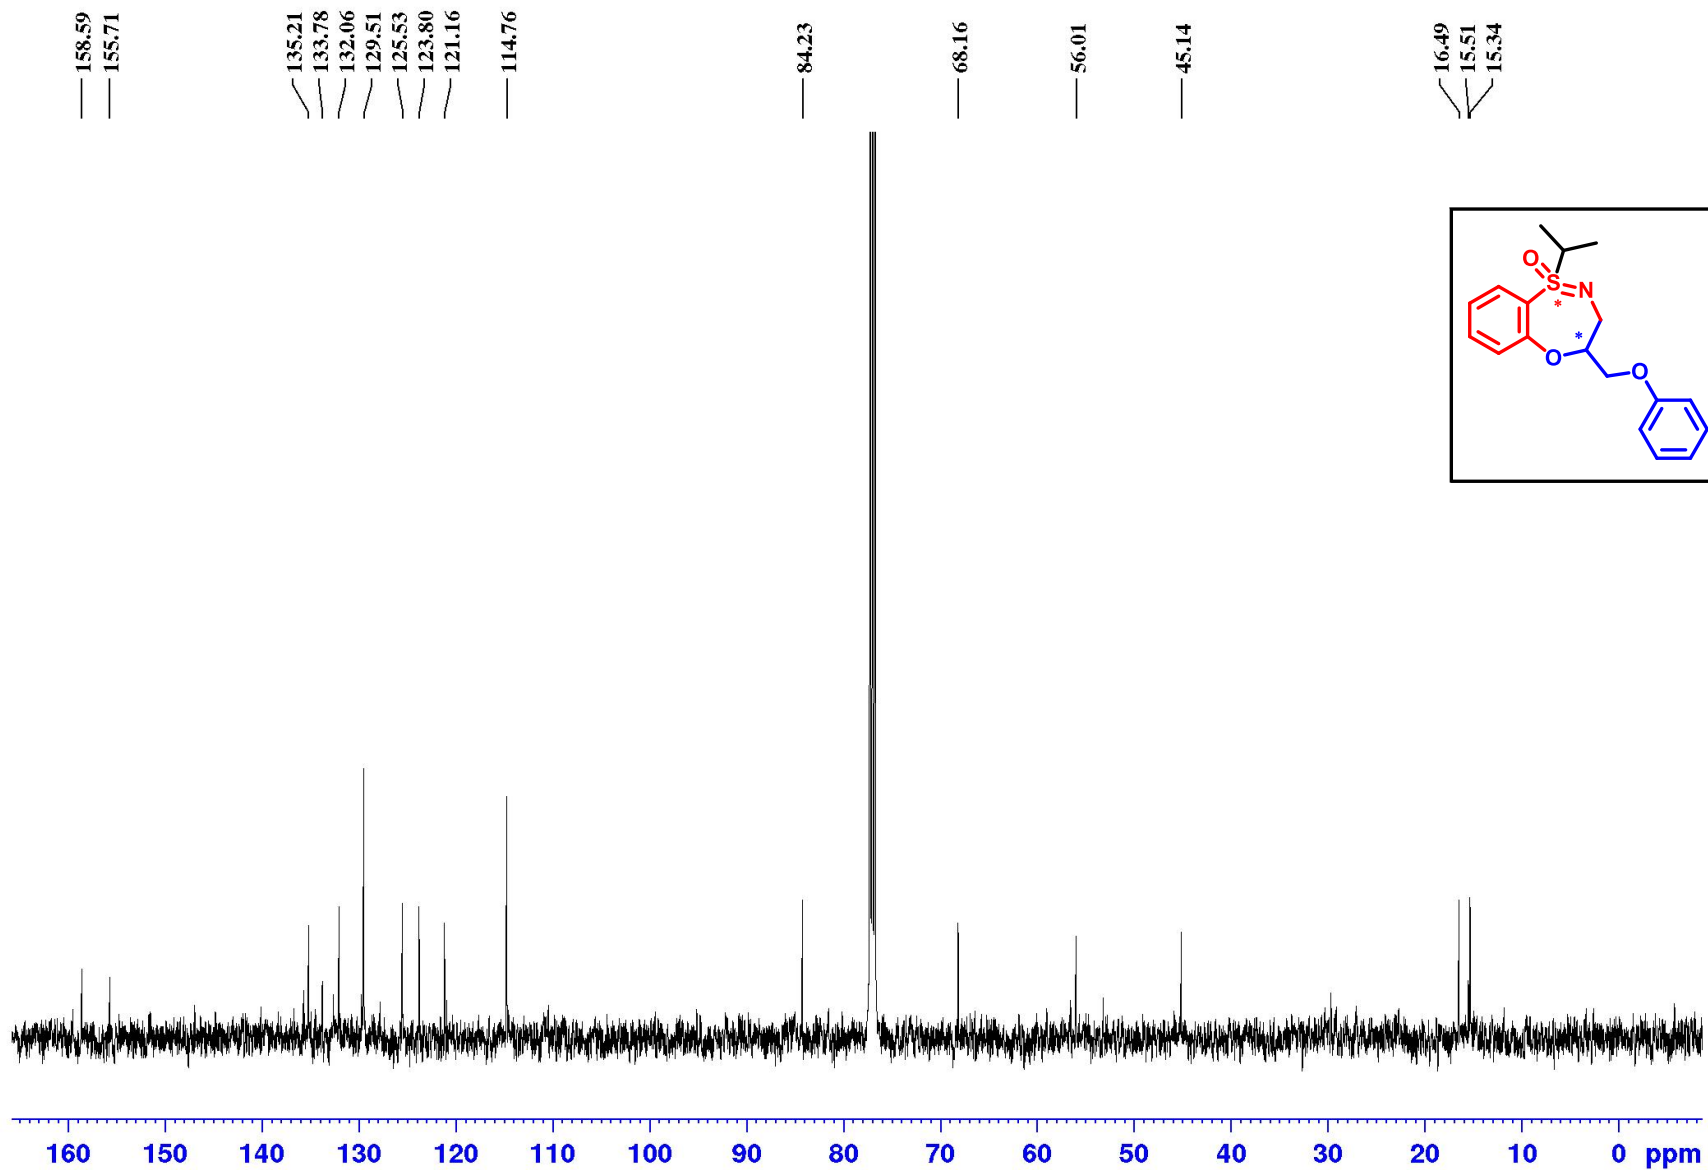

**Fig S-173:**  $^{13}\text{C}$  NMR Spectra of Compound **4zc** (125 MHz,  $\text{CDCl}_3$ )

|               |                  |             |             |                 |              |                        |                       |
|---------------|------------------|-------------|-------------|-----------------|--------------|------------------------|-----------------------|
| Sample Name   | SP 1854          | Position    | Vial 1      | Instrument Name | Instrument 1 | User Name              |                       |
| Inj Vol       | 1                | InjPosition |             | SampleType      | Sample       | IRM Calibration Status | Some Ions Missed      |
| Data Filename | HRMS22I12MAY01.d | ACQ Method  | ISOCRATIC.m | Comment         |              | Acquired Time          | 5/12/2022 11:24:12 AM |

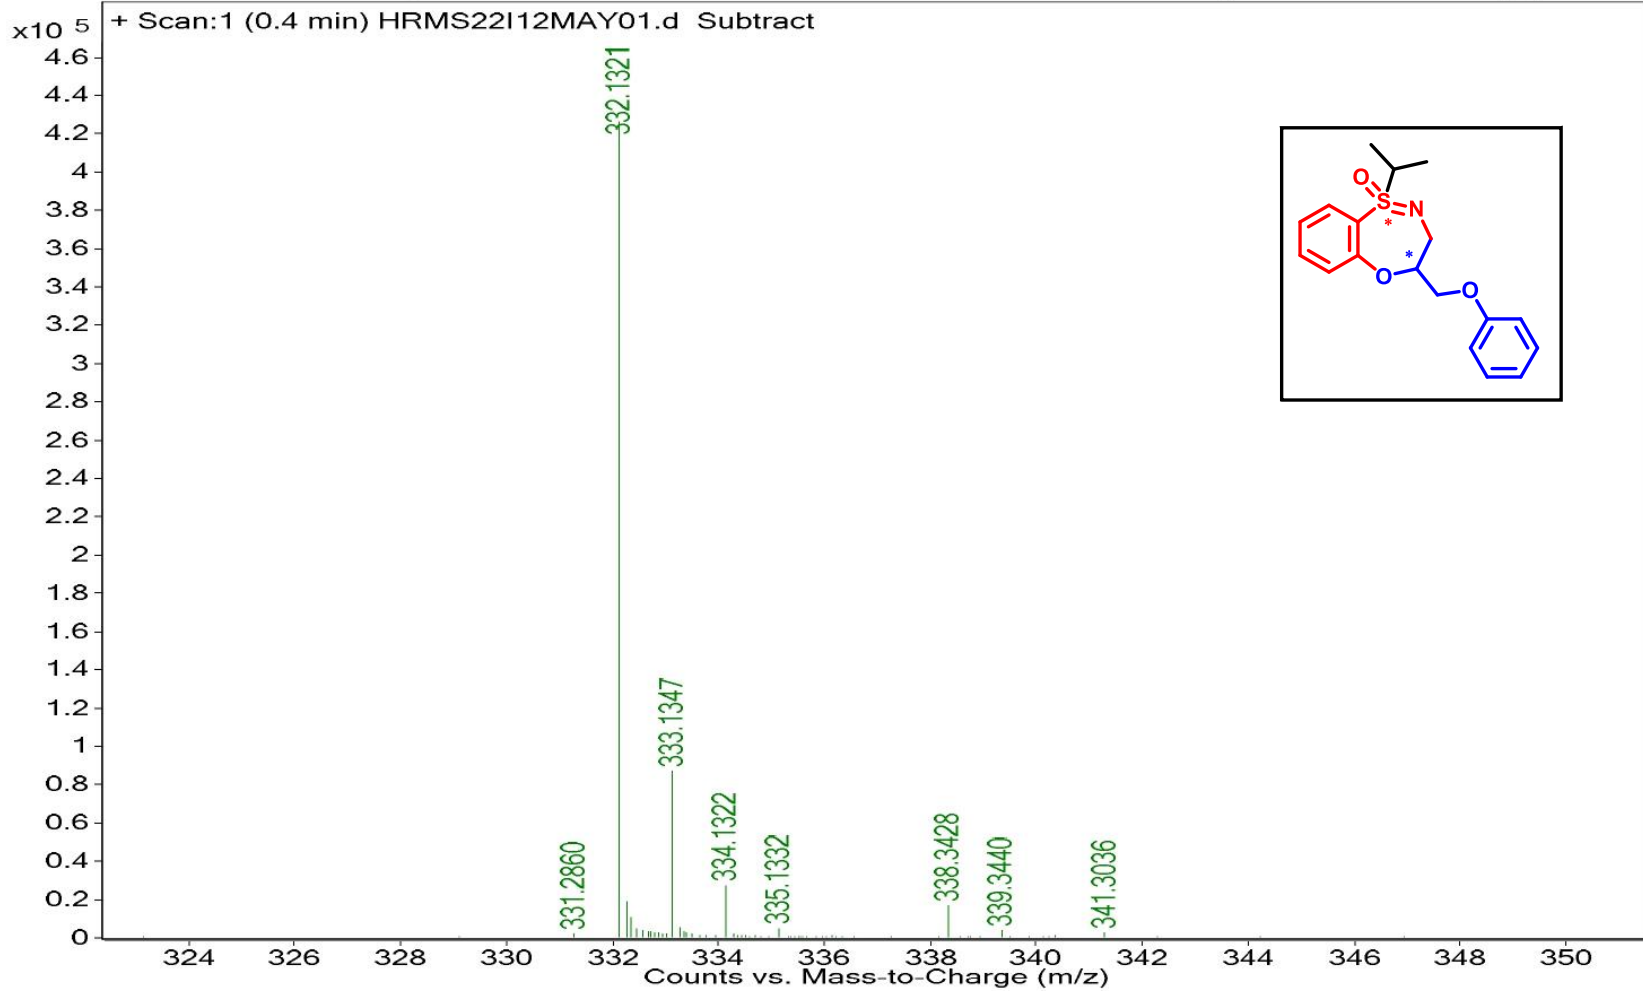

Fig S-174: HRMS report of Compound 4zc

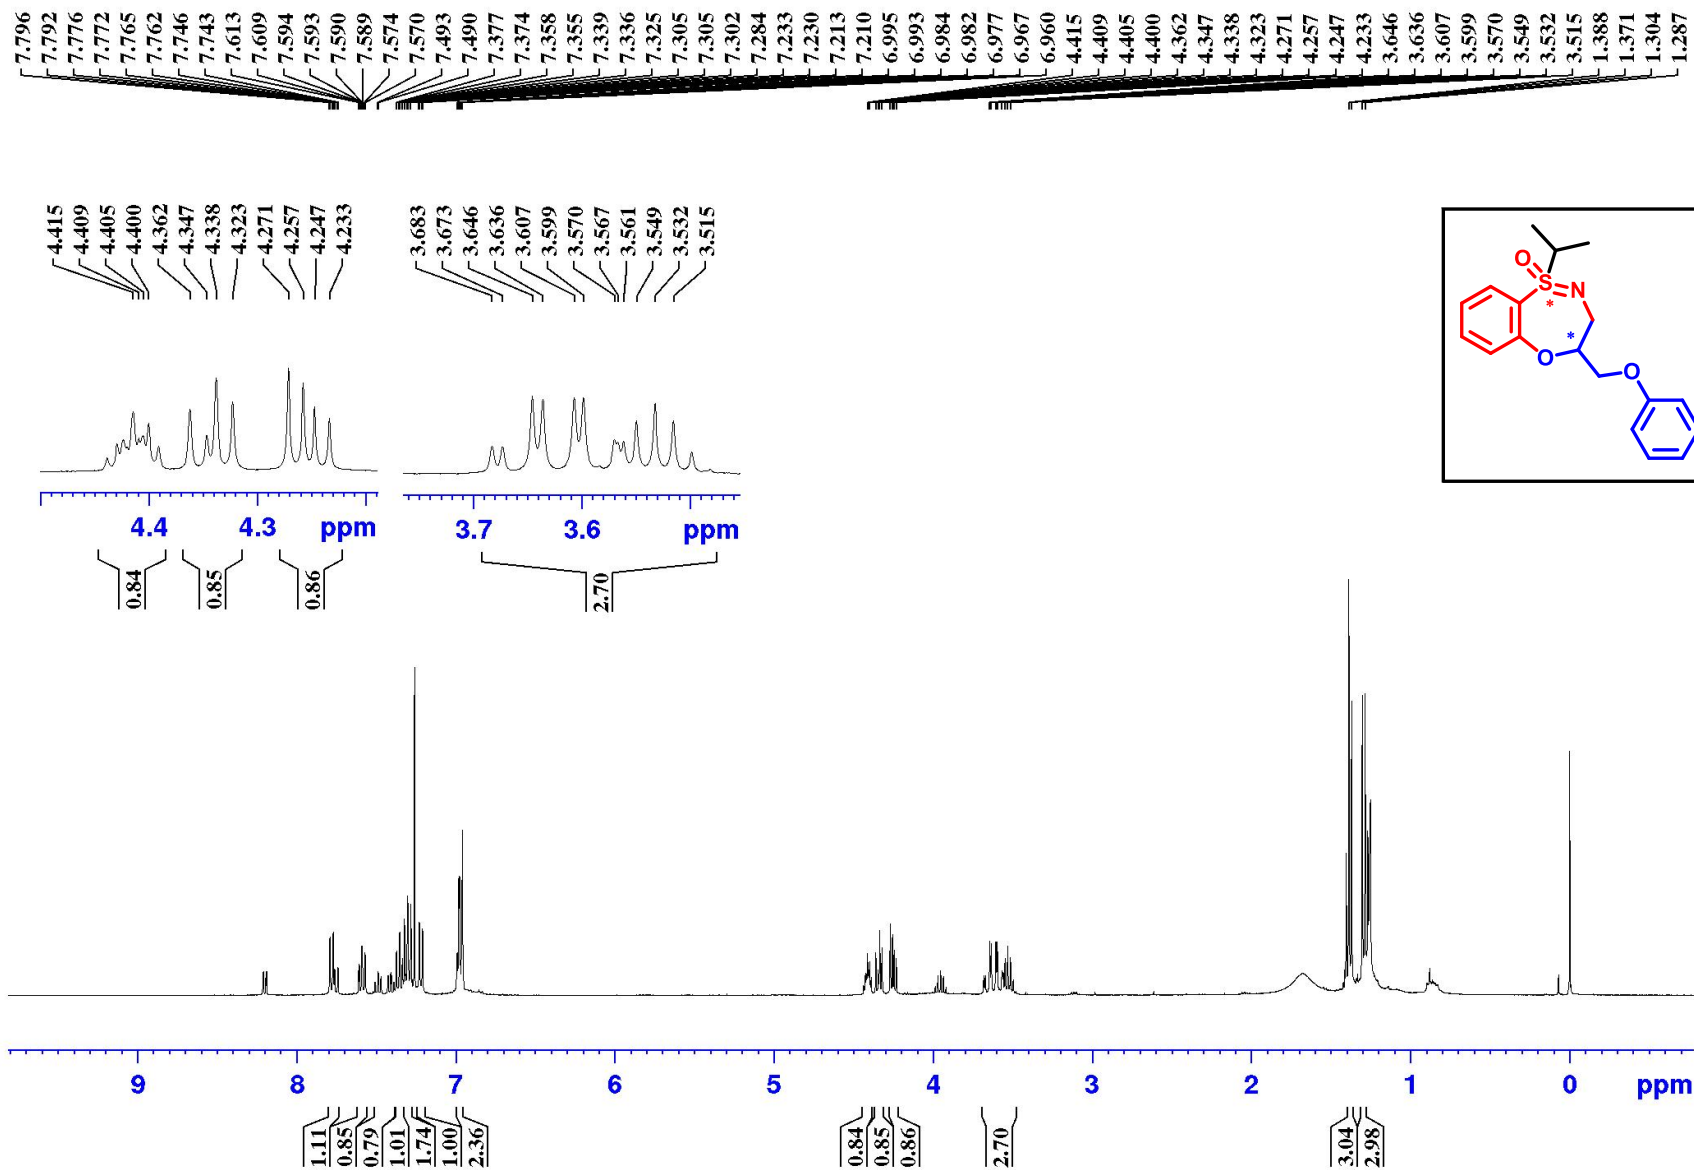

**Fig S-175:**  $^1\text{H}$  NMR Spectra of Compound **4zc'** (400 MHz,  $\text{CDCl}_3$ )

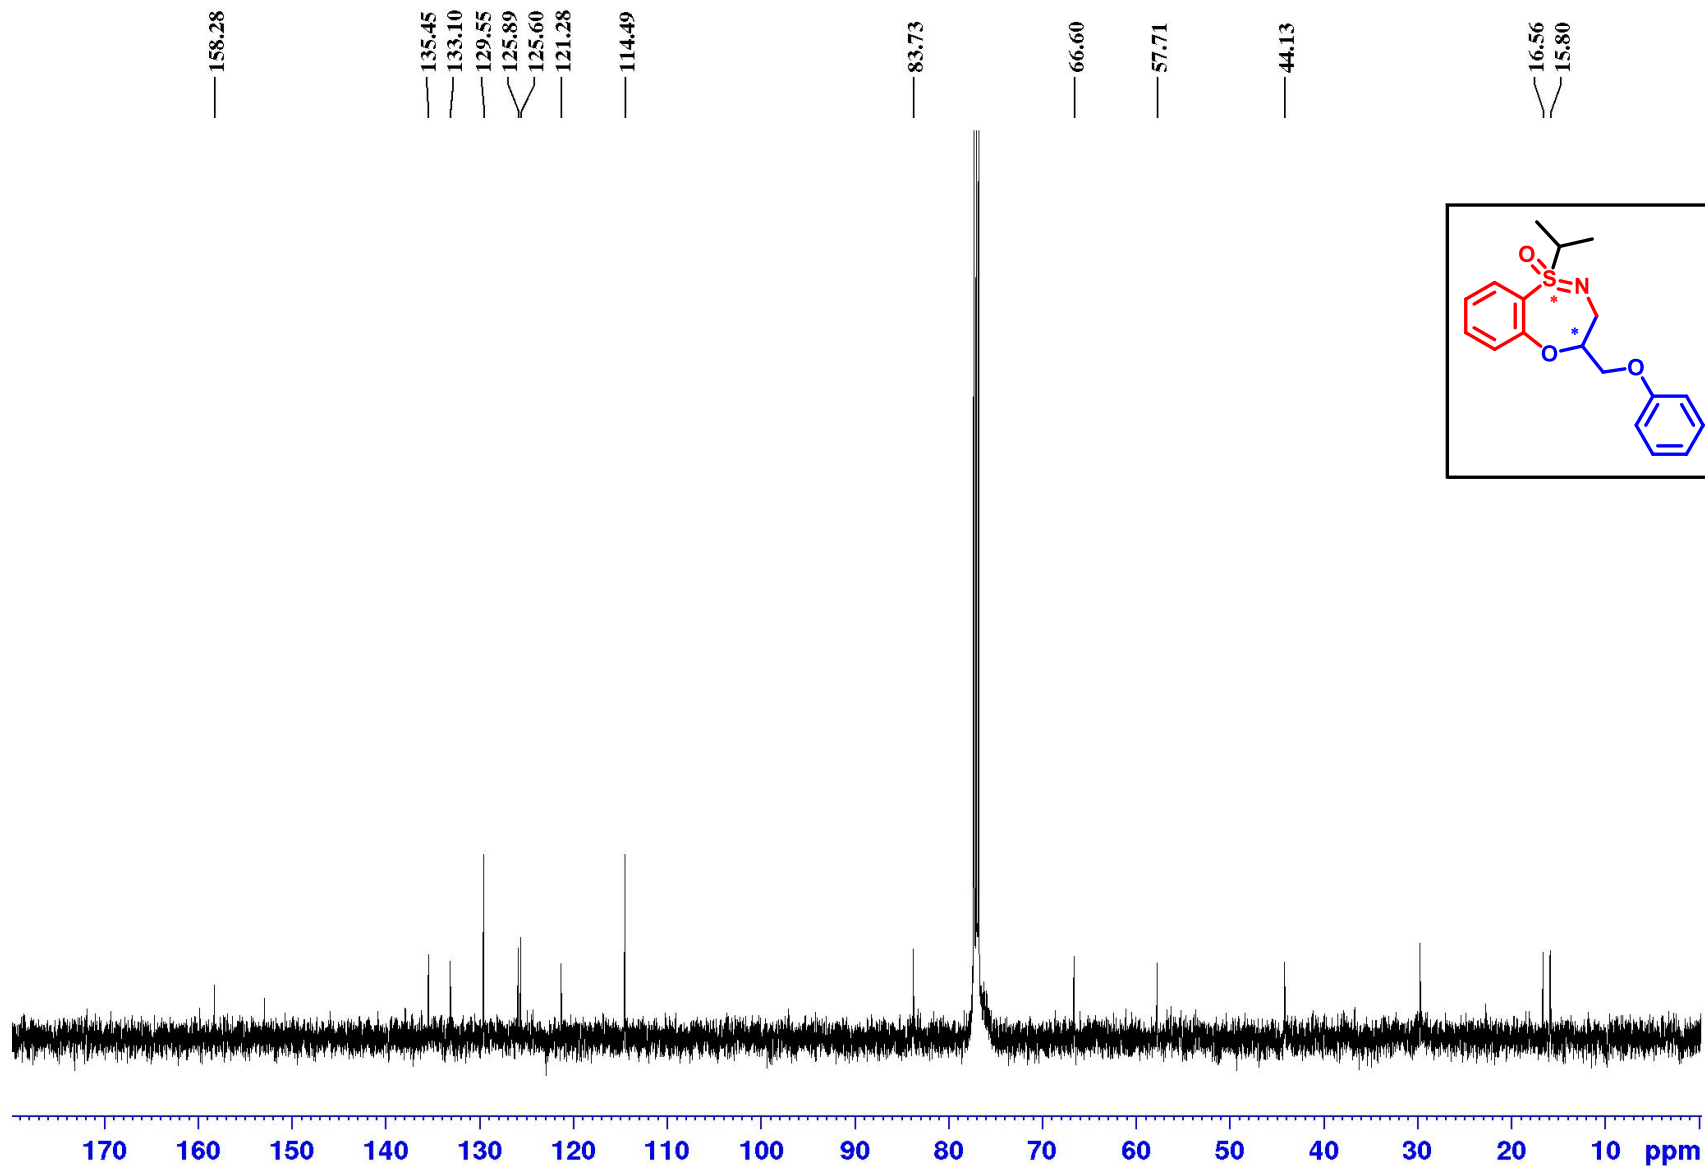

**Fig S-176:**  $^{13}\text{C}$  NMR Spectra of Compound 4zc' (100 MHz,  $\text{CDCl}_3$ )

|               |                  |             |             |                 |              |                        |                       |
|---------------|------------------|-------------|-------------|-----------------|--------------|------------------------|-----------------------|
| Sample Name   | SP 1853          | Position    | Vial 2      | Instrument Name | Instrument 1 | User Name              |                       |
| Inj Vol       | 1                | InjPosition |             | SampleType      | Sample       | IRM Calibration Status | Some Ions Missed      |
| Data Filename | HRMS22I12MAY02.d | ACQ Method  | ISOCRATIC.m | Comment         |              | Acquired Time          | 5/12/2022 11:27:49 AM |

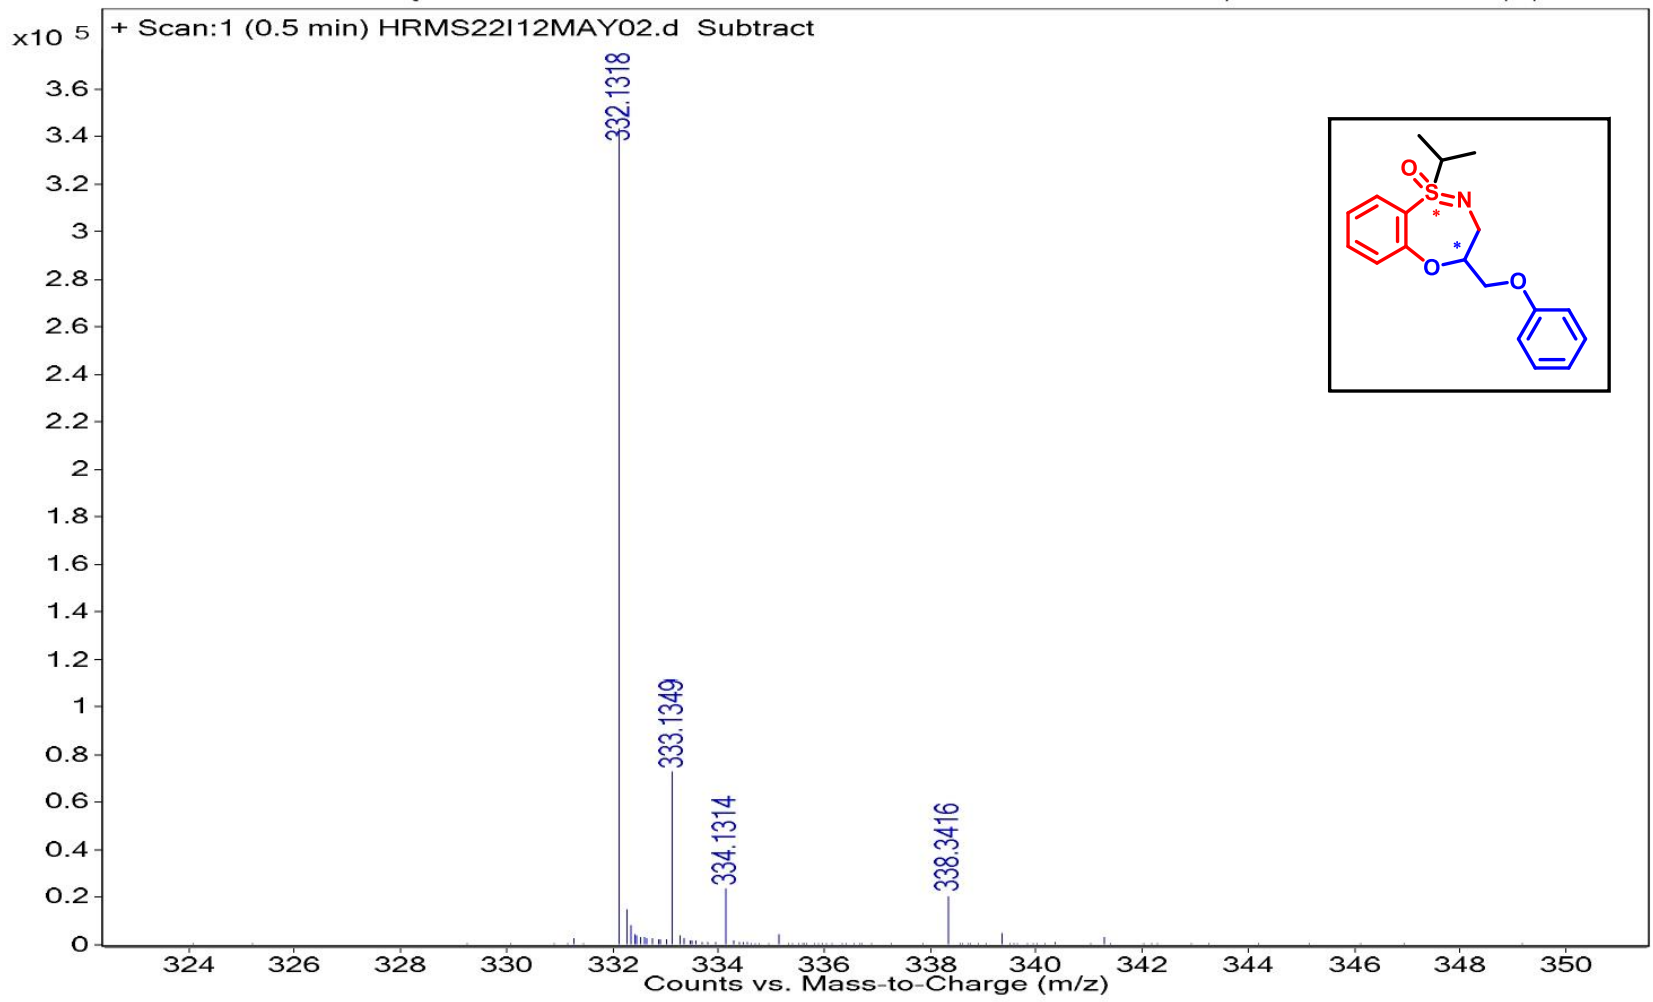

Fig S-177: HRMS report of Compound 4zc'

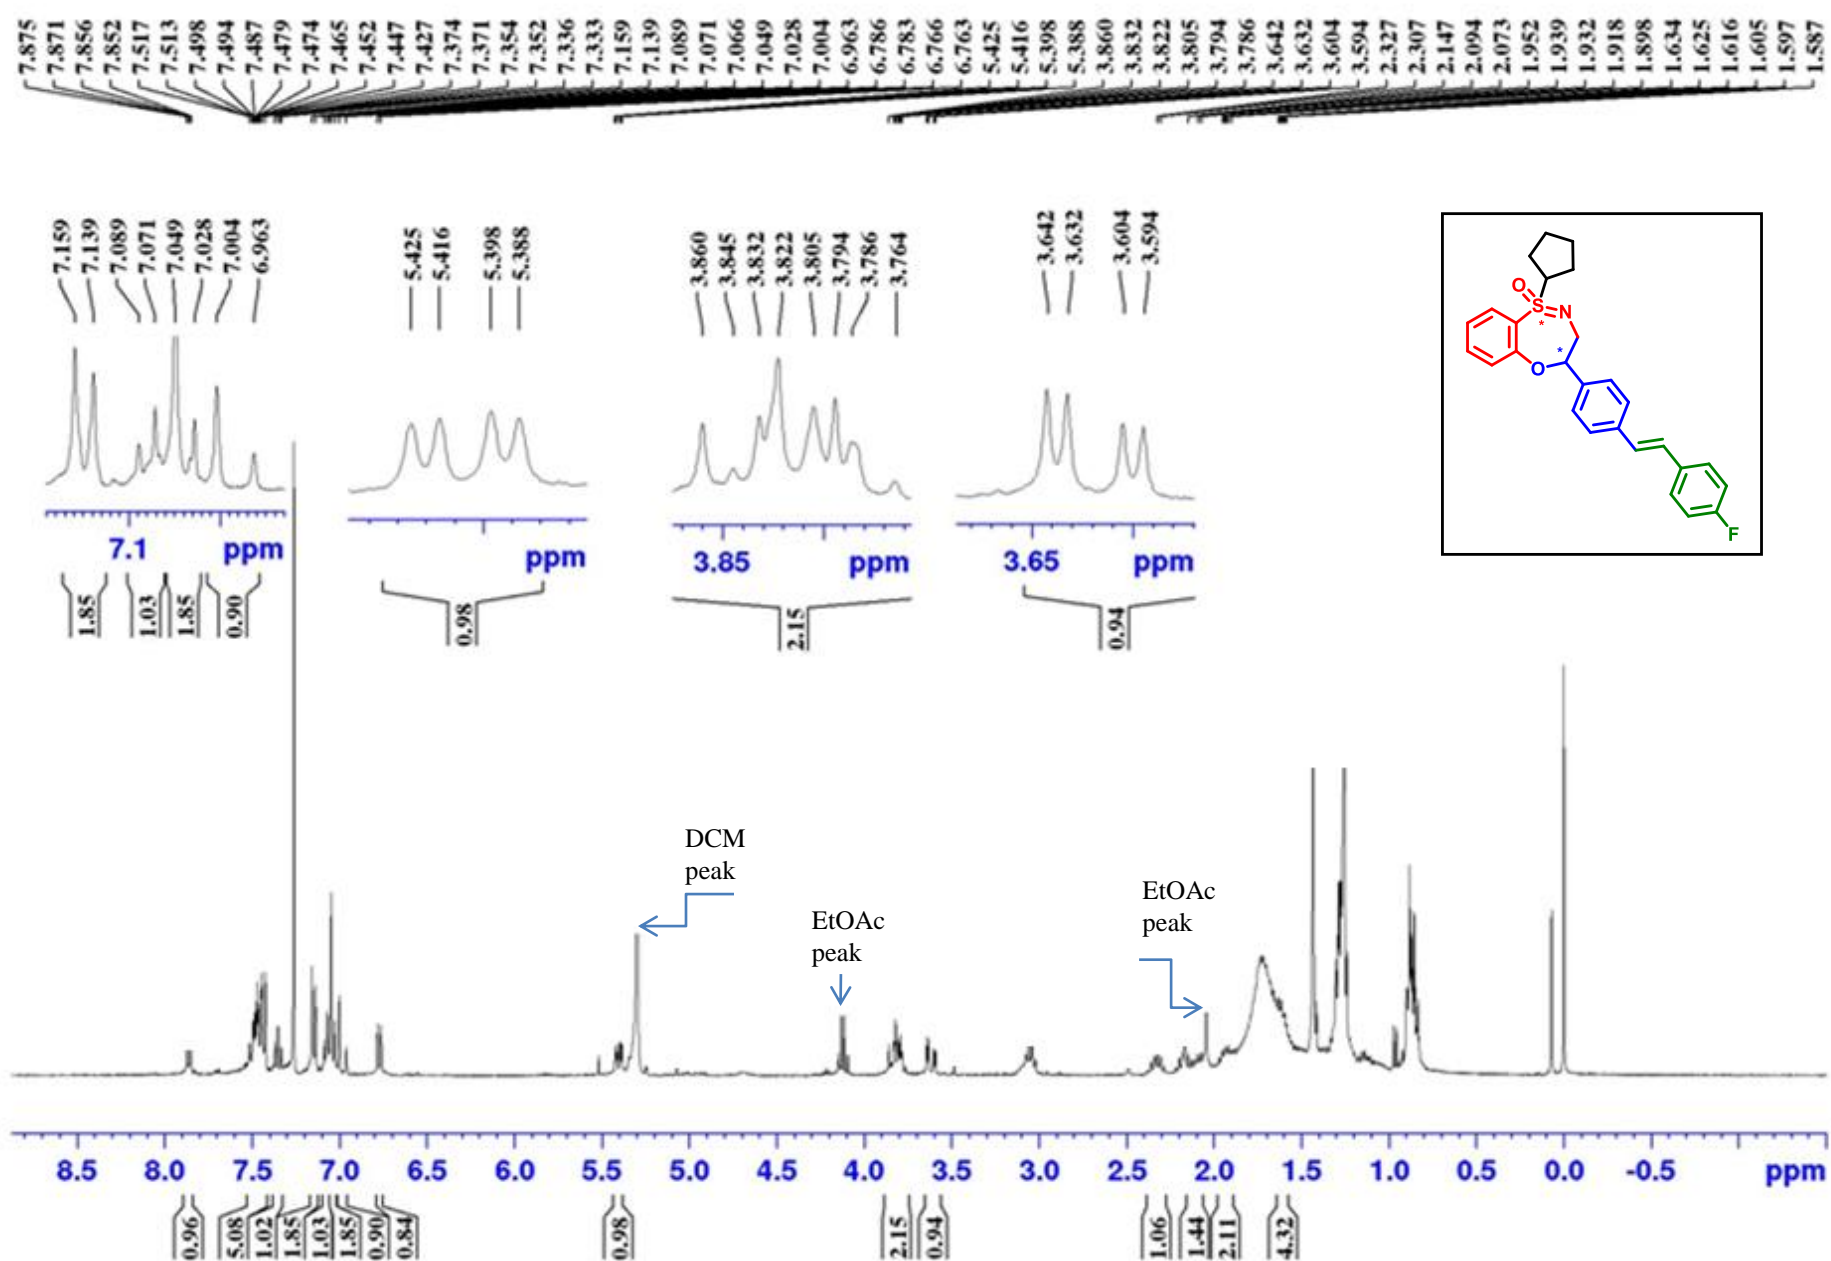

**Fig S-178:**  $^1\text{H}$  NMR Spectra of Compound **5a** (400 MHz,  $\text{CDCl}_3$ )

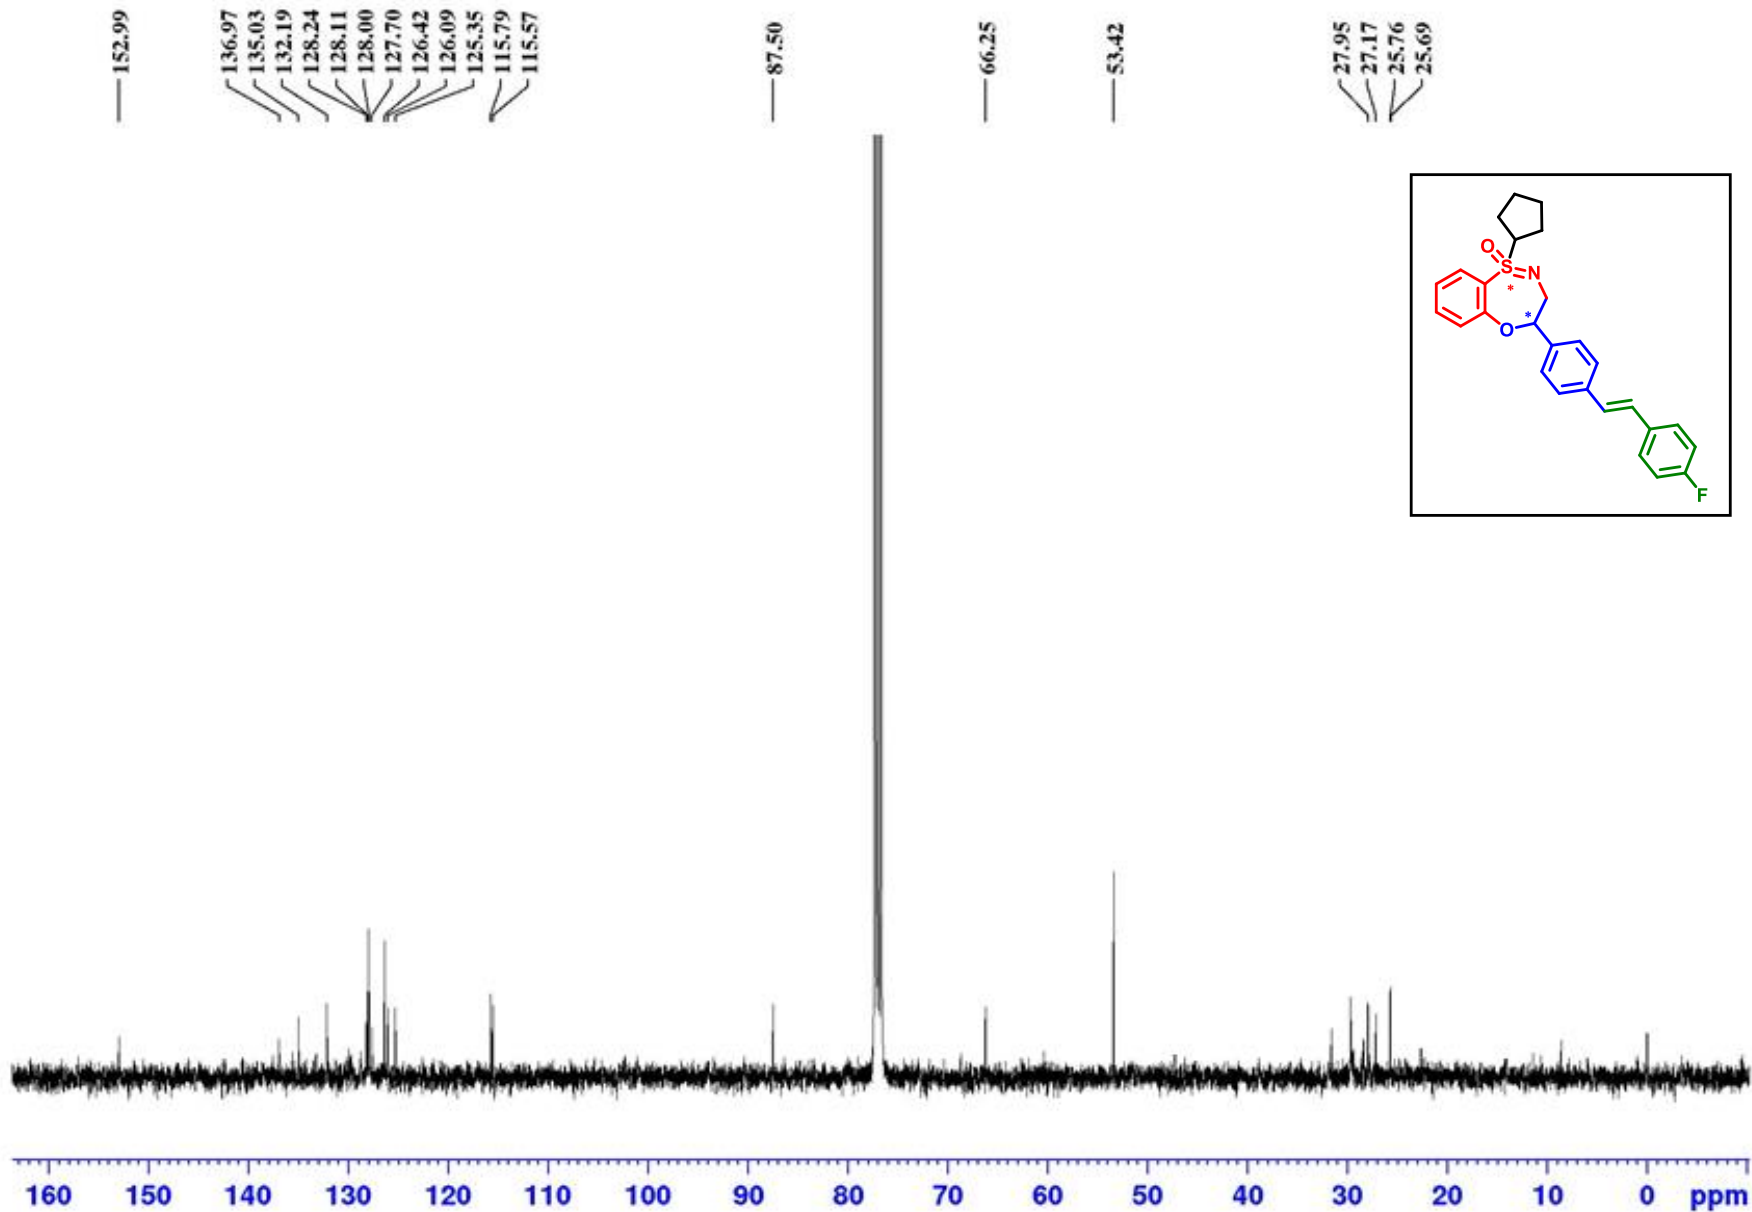

**Fig S-179:**  $^{13}\text{C}$  NMR Spectra of Compound **5a** (100 MHz,  $\text{CDCl}_3$ )



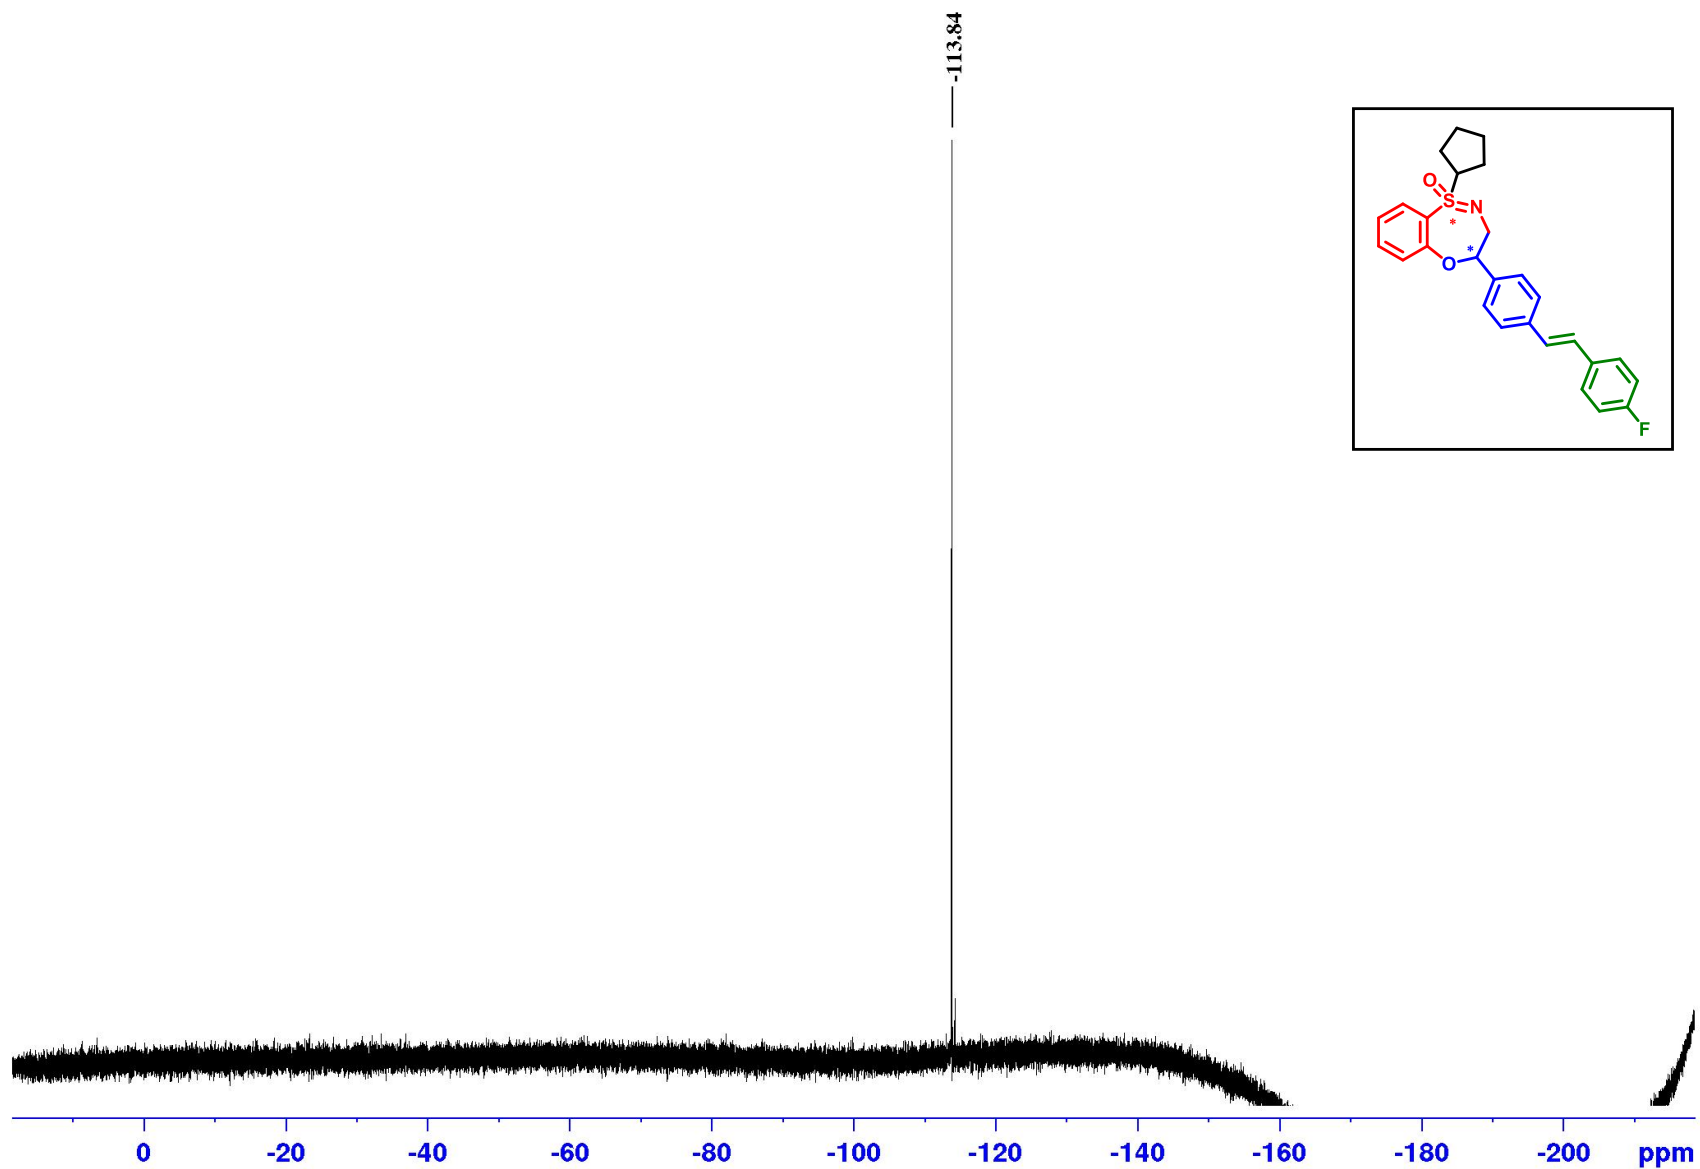

**Fig S-180:**  $^{19}\text{F}$  NMR Spectra of Compound **5a** (376 MHz,  $\text{CDCl}_3$ )

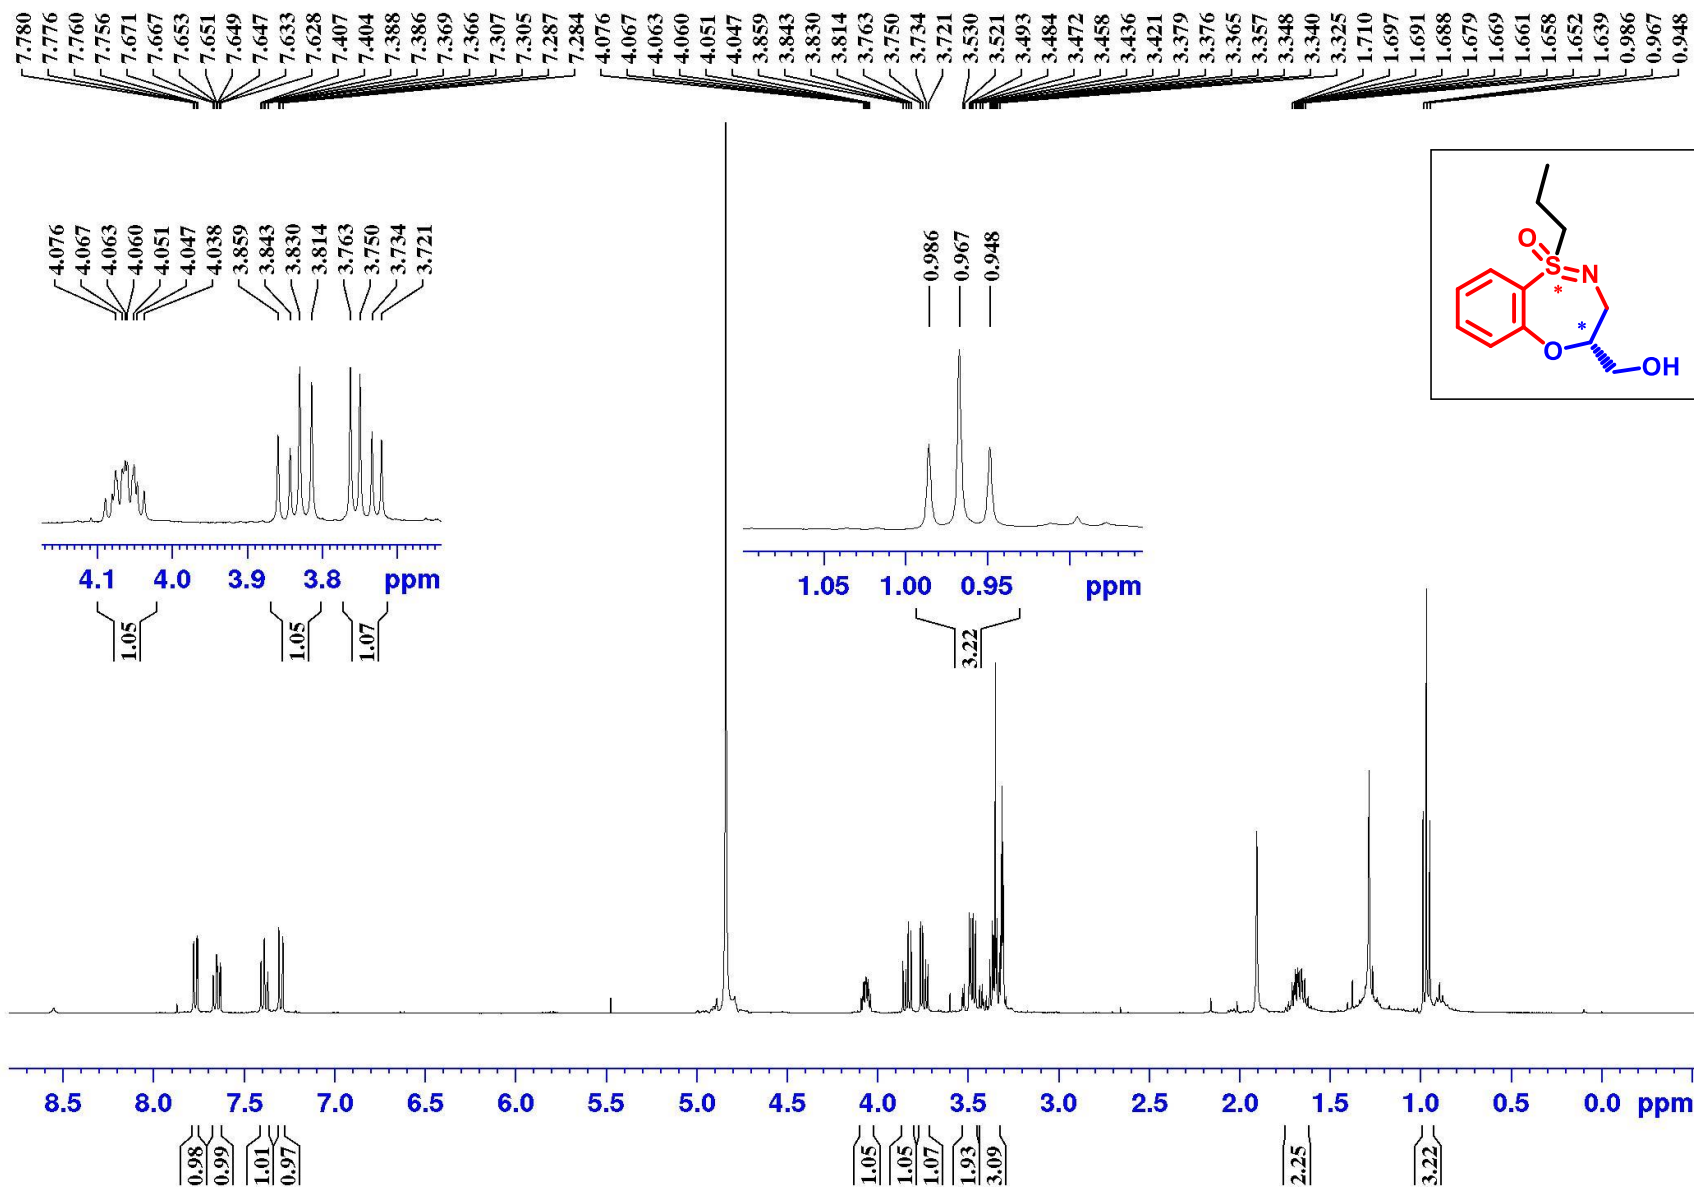

**Fig S-181:**  $^1\text{H}$  NMR Spectra of Compound **5b** (400 MHz,  $\text{CD}_3\text{OD}$ )

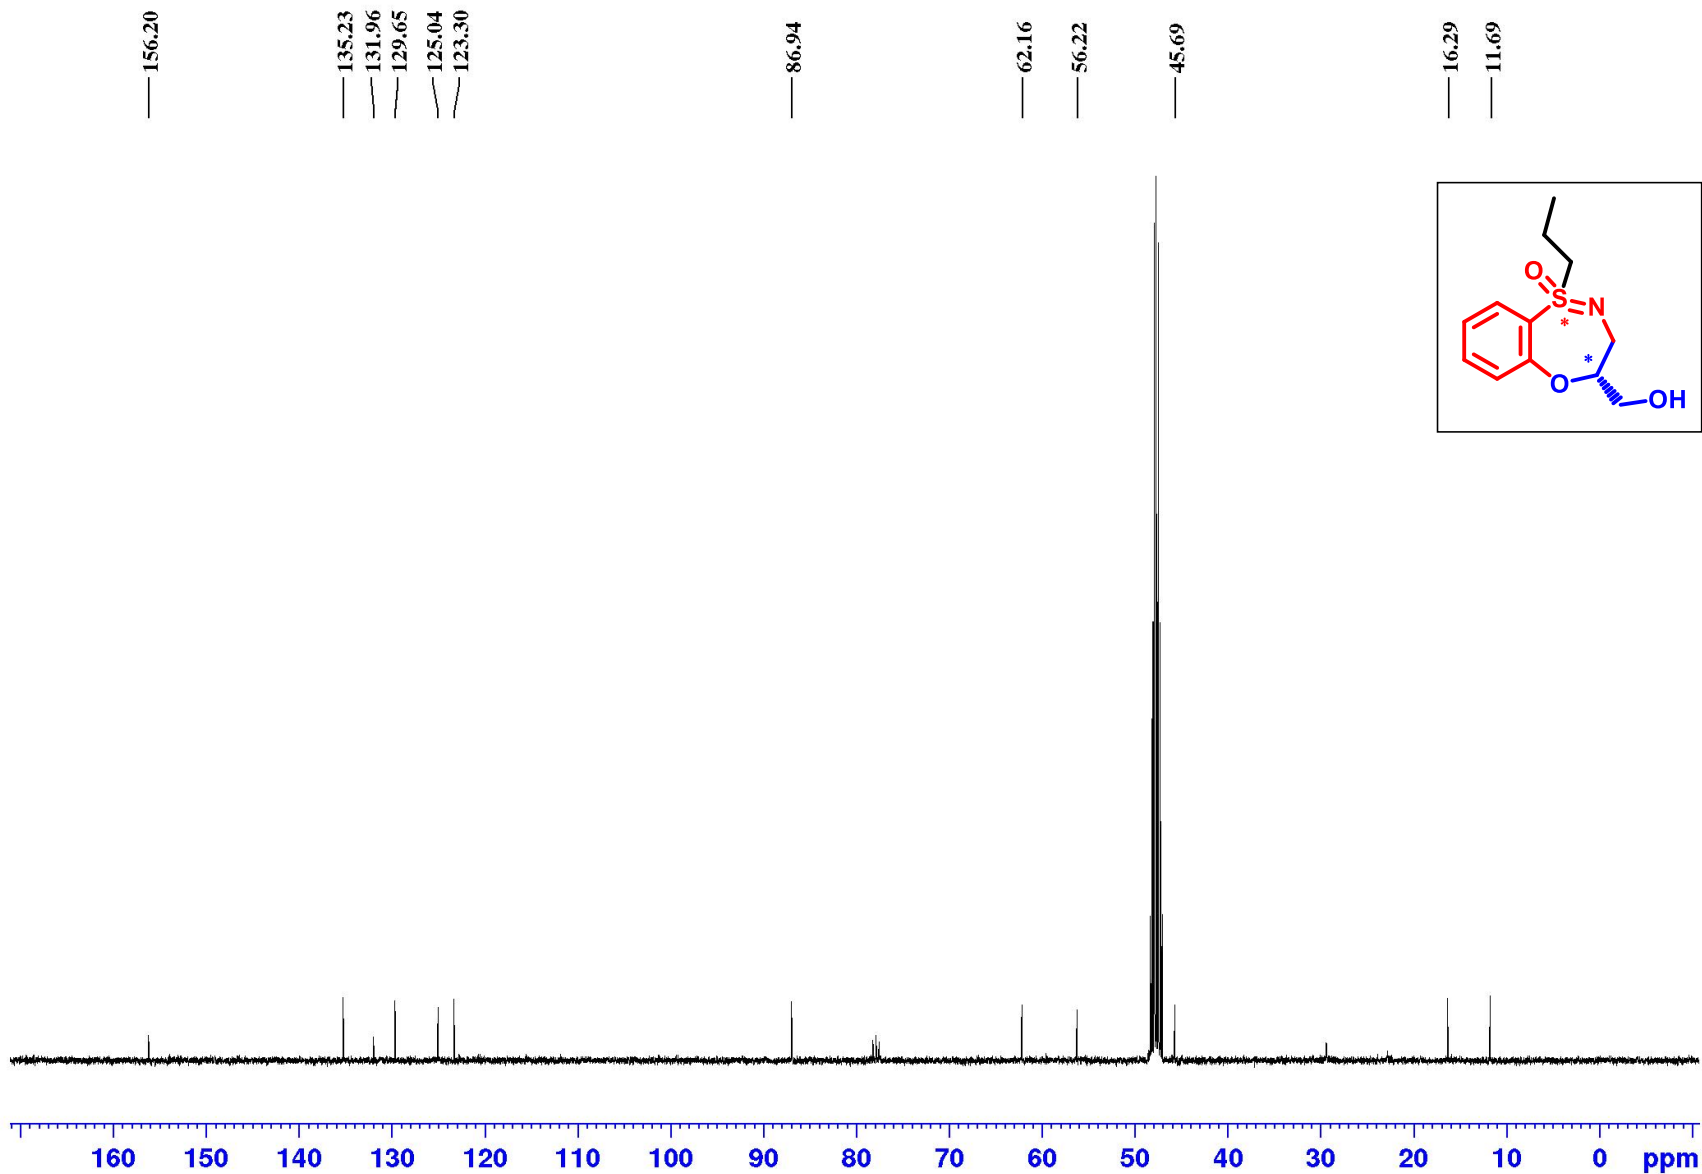

**Fig S-182:**  $^{13}\text{C}$  NMR Spectra of Compound **5b** (100 MHz,  $\text{CD}_3\text{OD}$ )

|               |                  |             |             |                 |              |                        |                       |
|---------------|------------------|-------------|-------------|-----------------|--------------|------------------------|-----------------------|
| Sample Name   | 5b               | Position    | Vial 25     | Instrument Name | Instrument 1 | User Name              |                       |
| Inj Vol       | 1                | InjPosition |             | SampleType      | Sample       | IRM Calibration Status | Some Ions Missed      |
| Data Filename | HRMS22I10MAY25.d | ACQ Method  | ISOCRATIC.m | Comment         |              | Acquired Time          | 5/10/2022 12:32:08 PM |

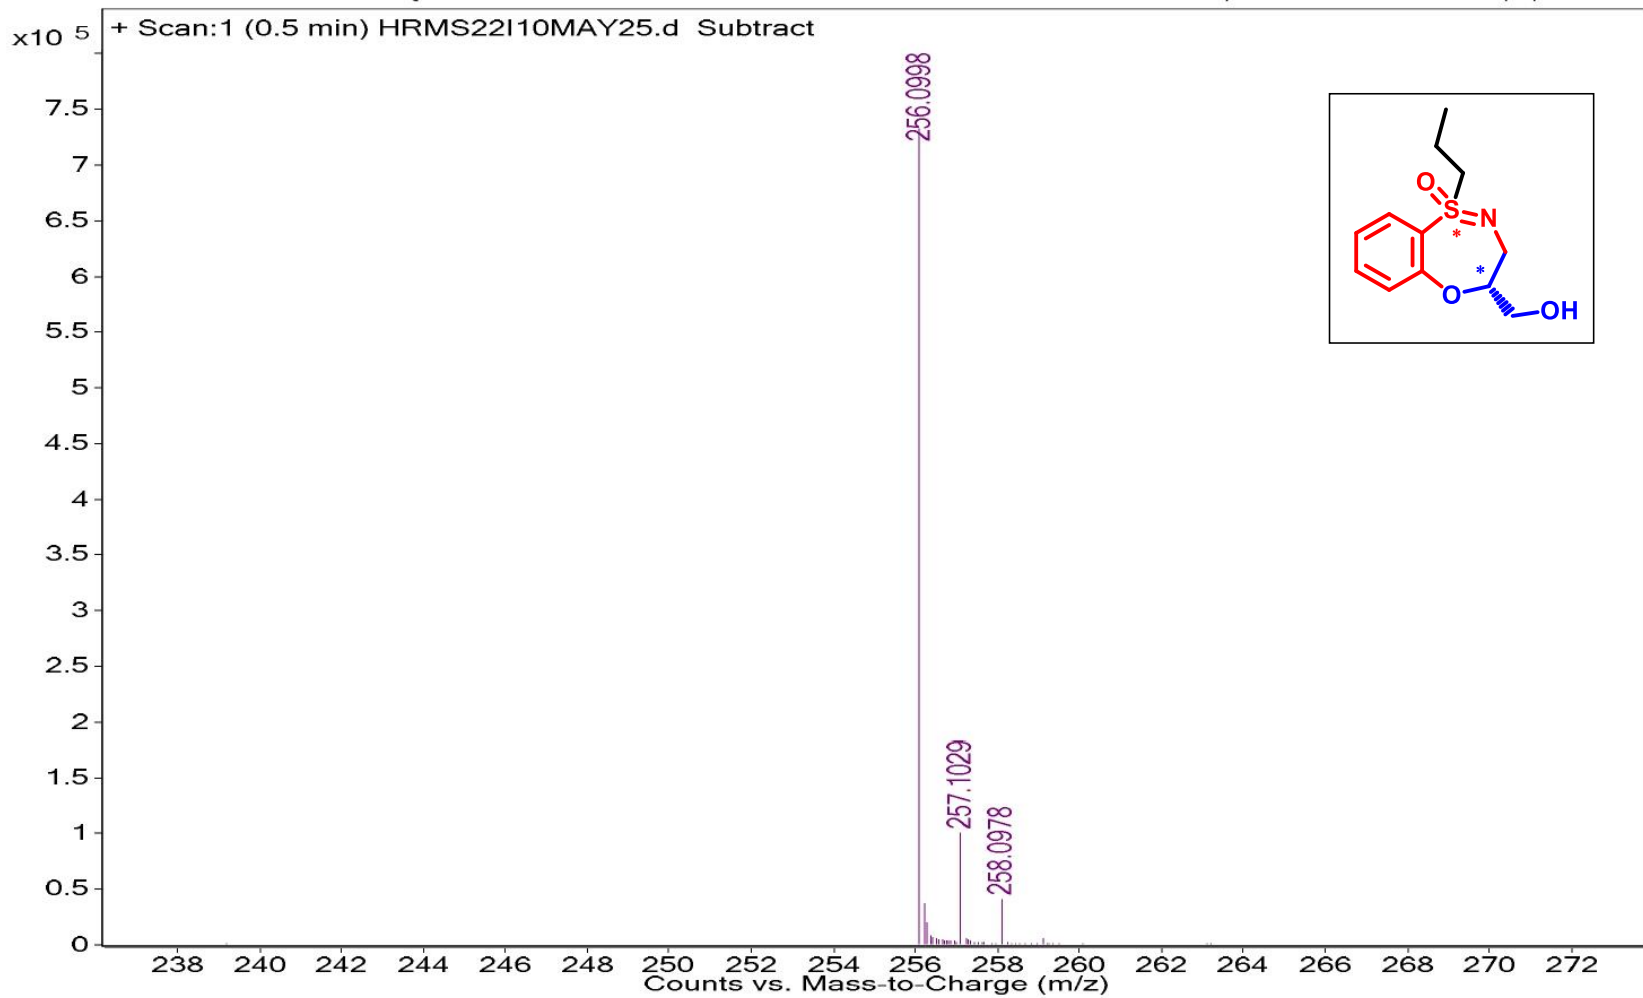

**Fig S-183:** HRMS report of Compound **5b**

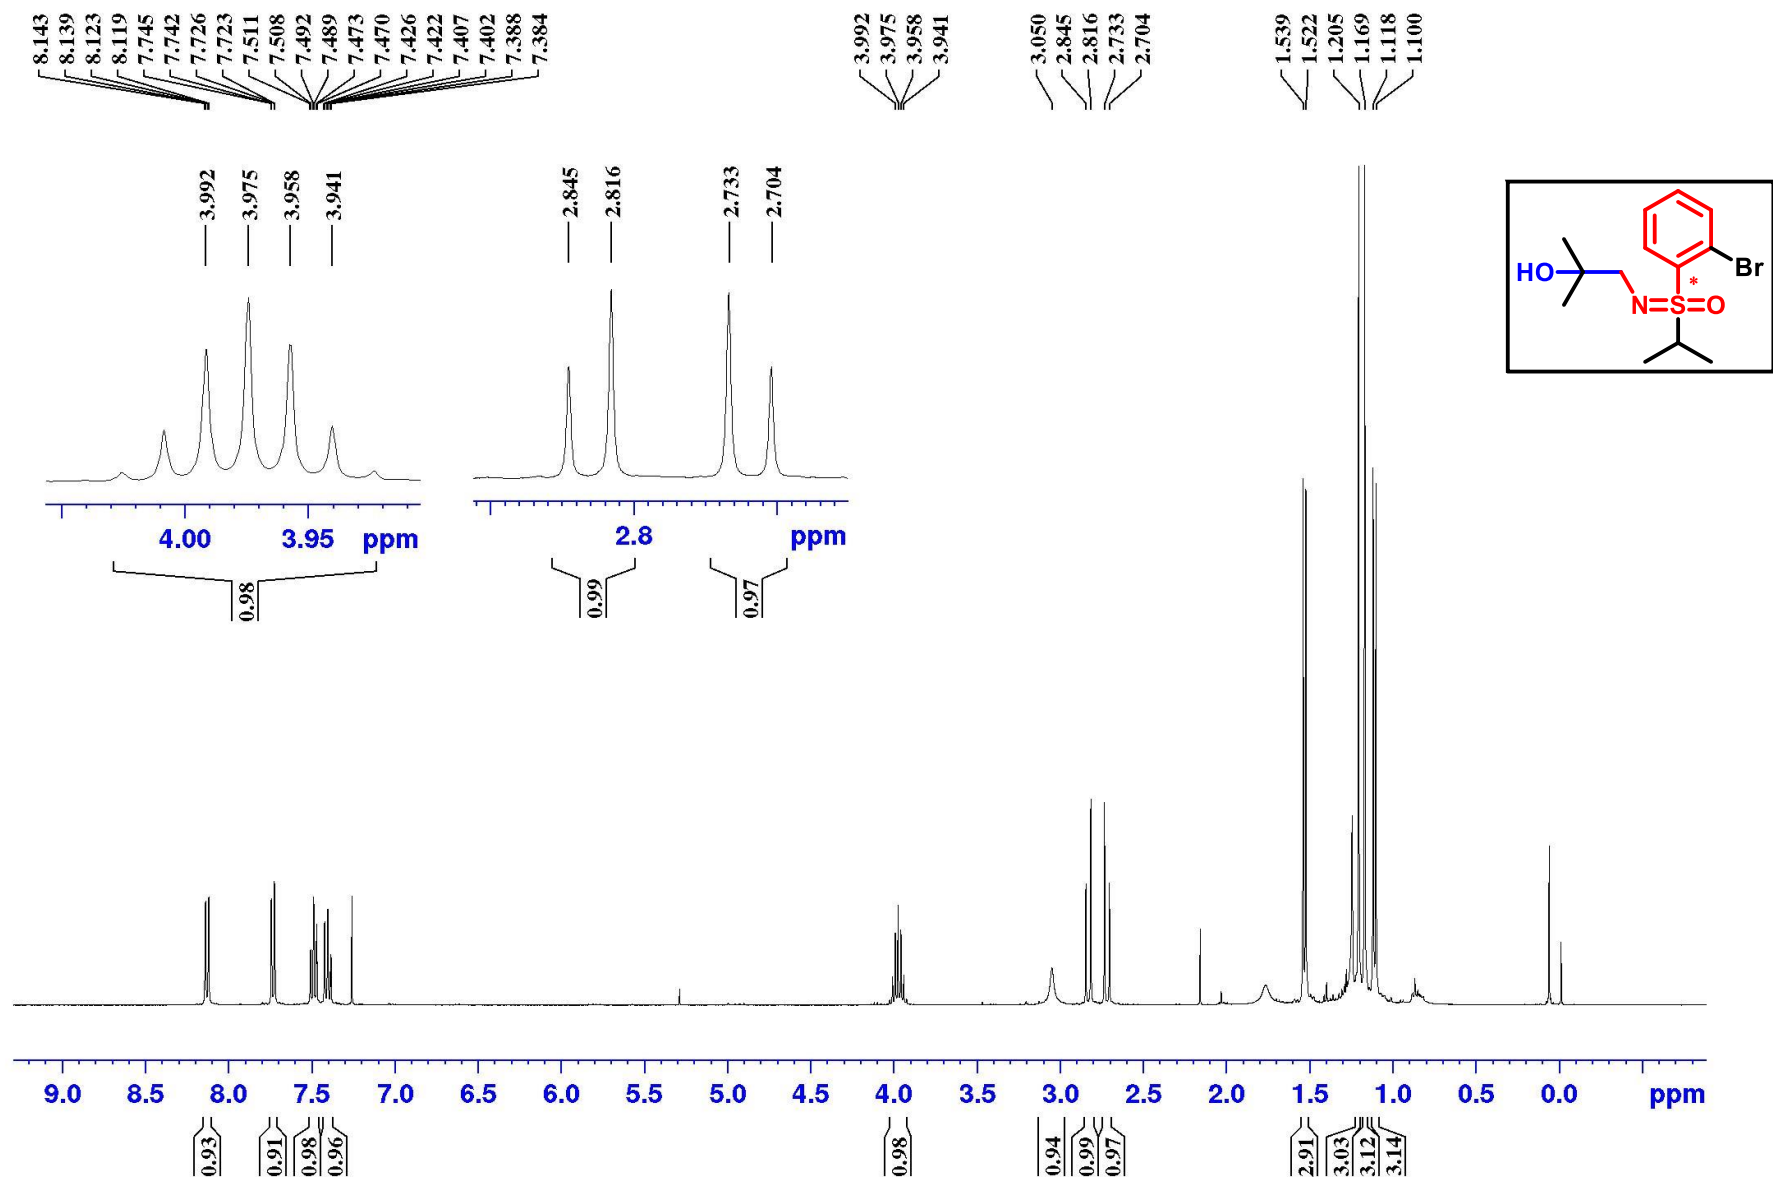

**Fig S-184:**  $^1\text{H}$  NMR Spectra of Compound **5c** (400 MHz,  $\text{CDCl}_3$ )

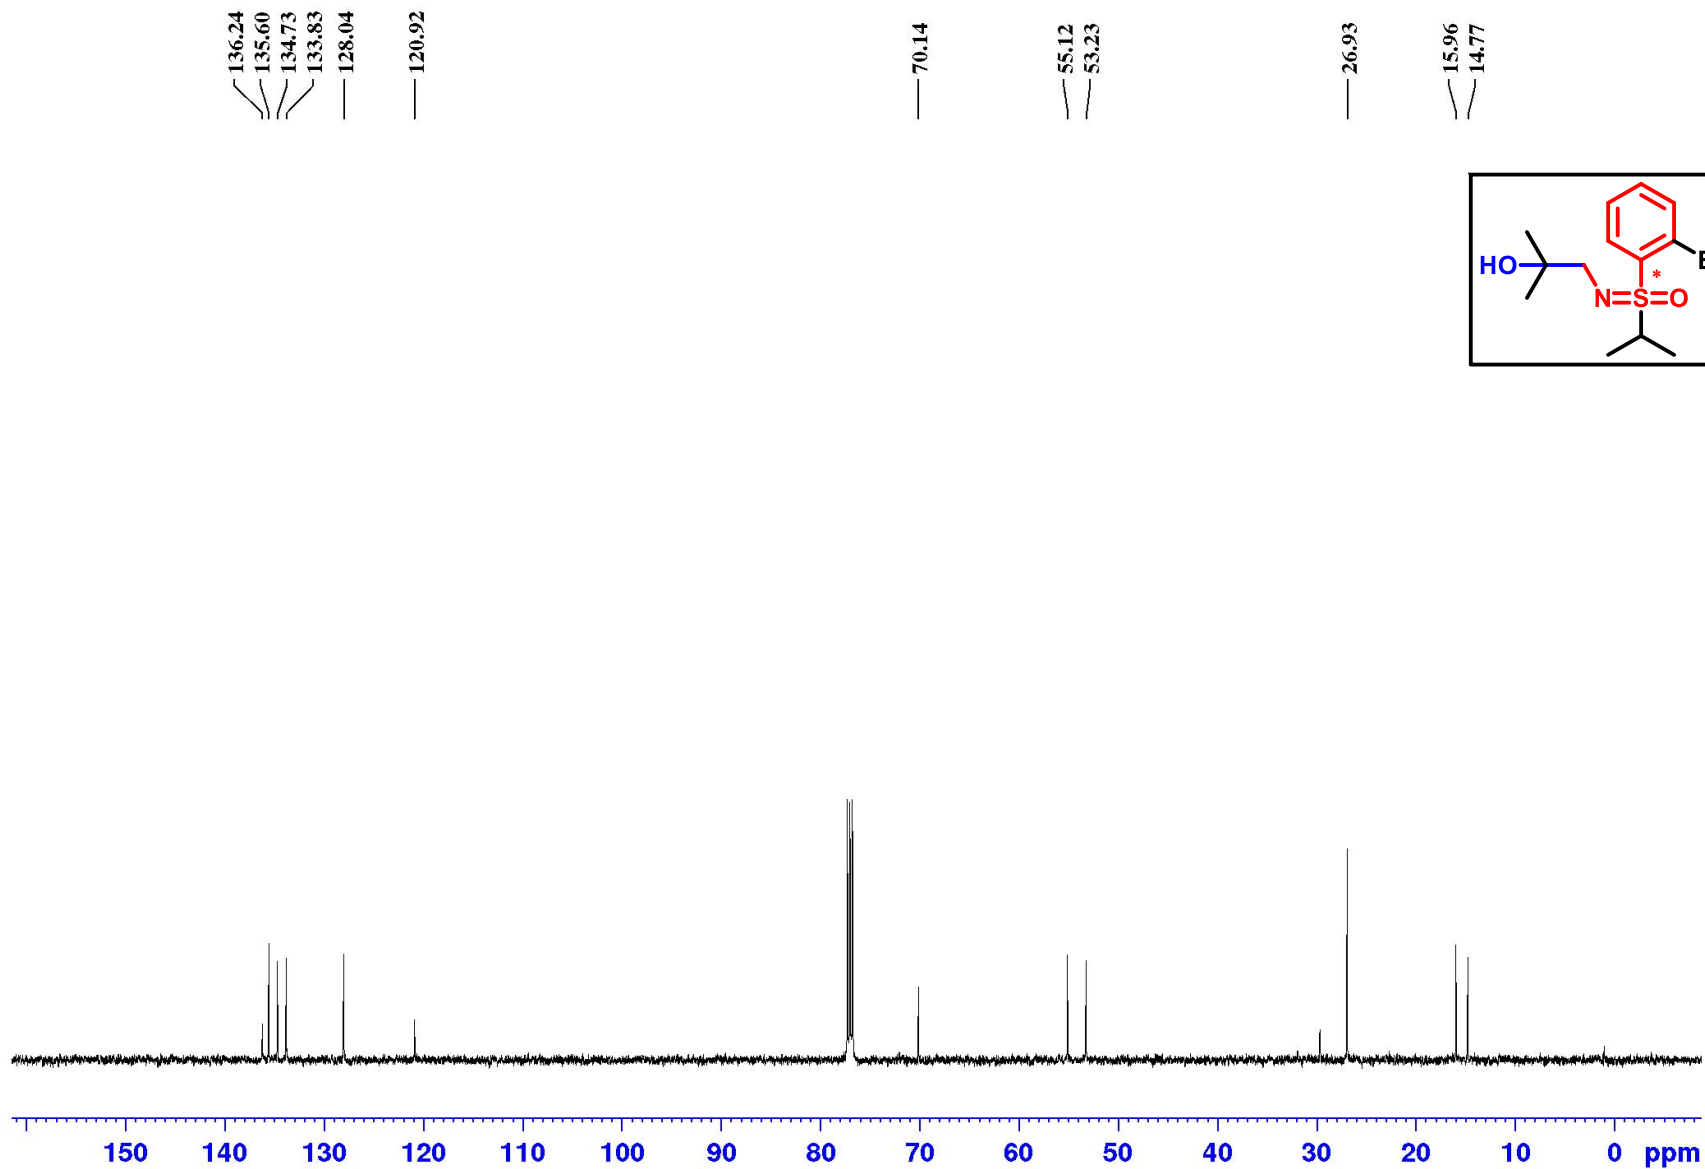

**Fig S-185:**  $^{13}\text{C}$  NMR Spectra of Compound 5c (125 MHz,  $\text{CDCl}_3$ )

|               |                  |             |             |                 |              |                        |                       |
|---------------|------------------|-------------|-------------|-----------------|--------------|------------------------|-----------------------|
| Sample Name   | 4ze              | Position    | Vial 29     | Instrument Name | Instrument 1 | User Name              |                       |
| Inj Vol       | 1                | InjPosition |             | SampleType      | Sample       | IRM Calibration Status | Some Ions Missed      |
| Data Filename | HRMS22I11MAY29.d | ACQ Method  | ISOCRATIC.m | Comment         |              | Acquired Time          | 5/11/2022 12:39:56 PM |

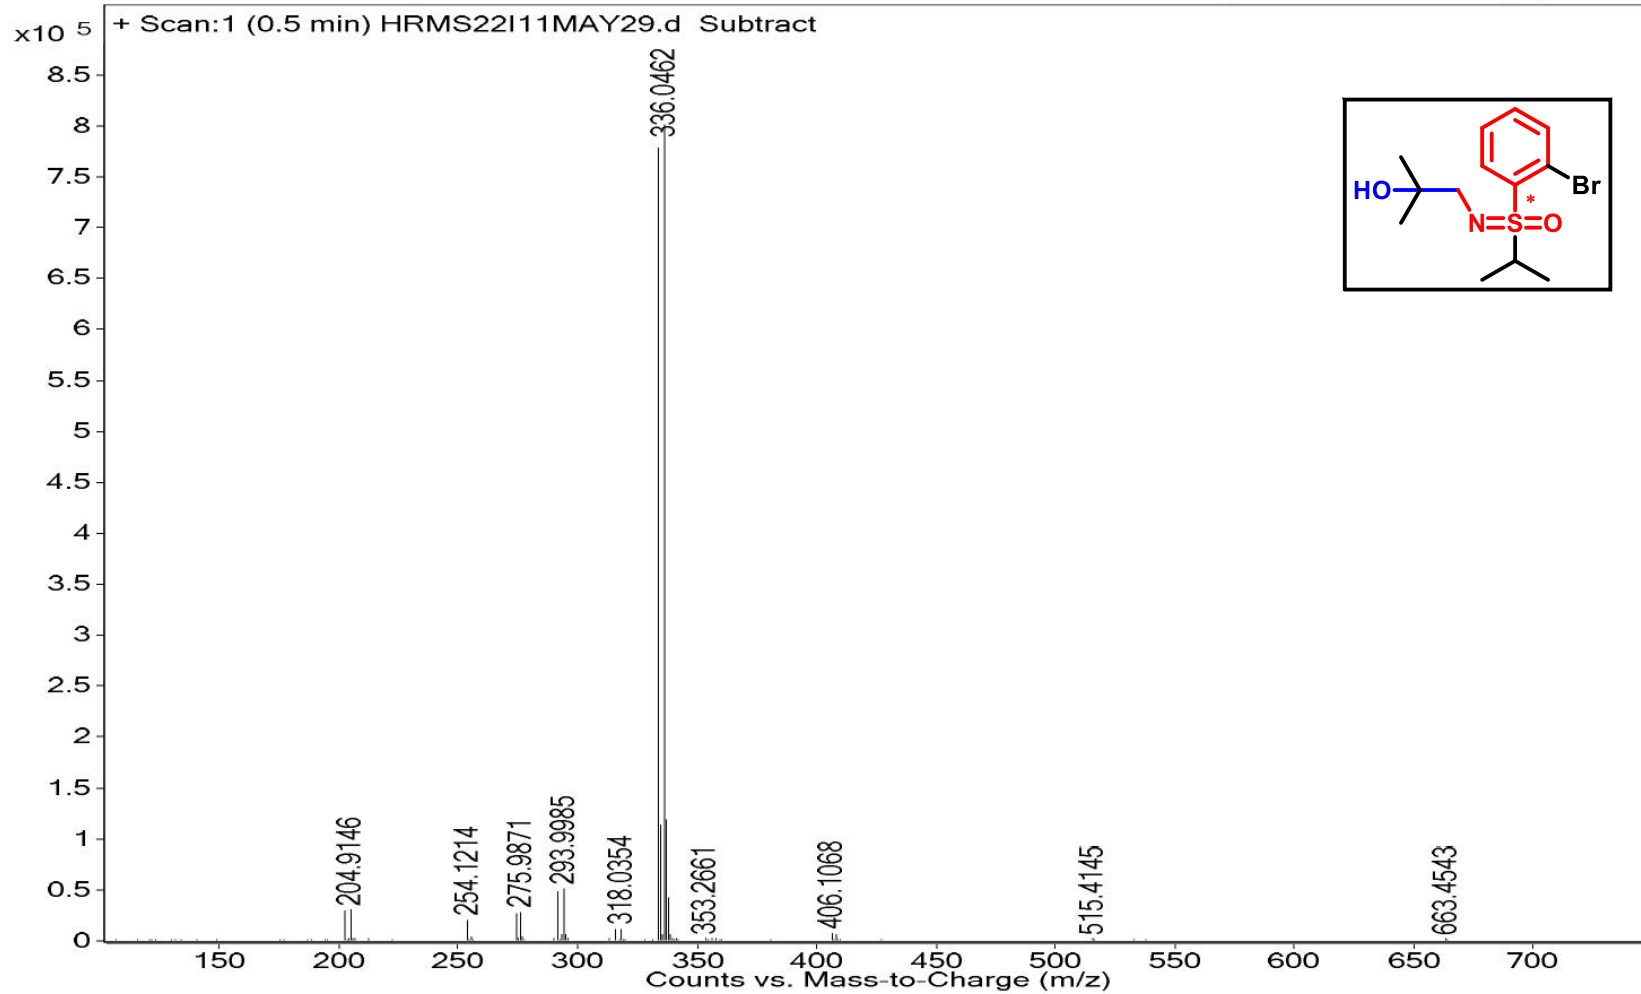

Fig S-186: HRMS report of Compound 5c

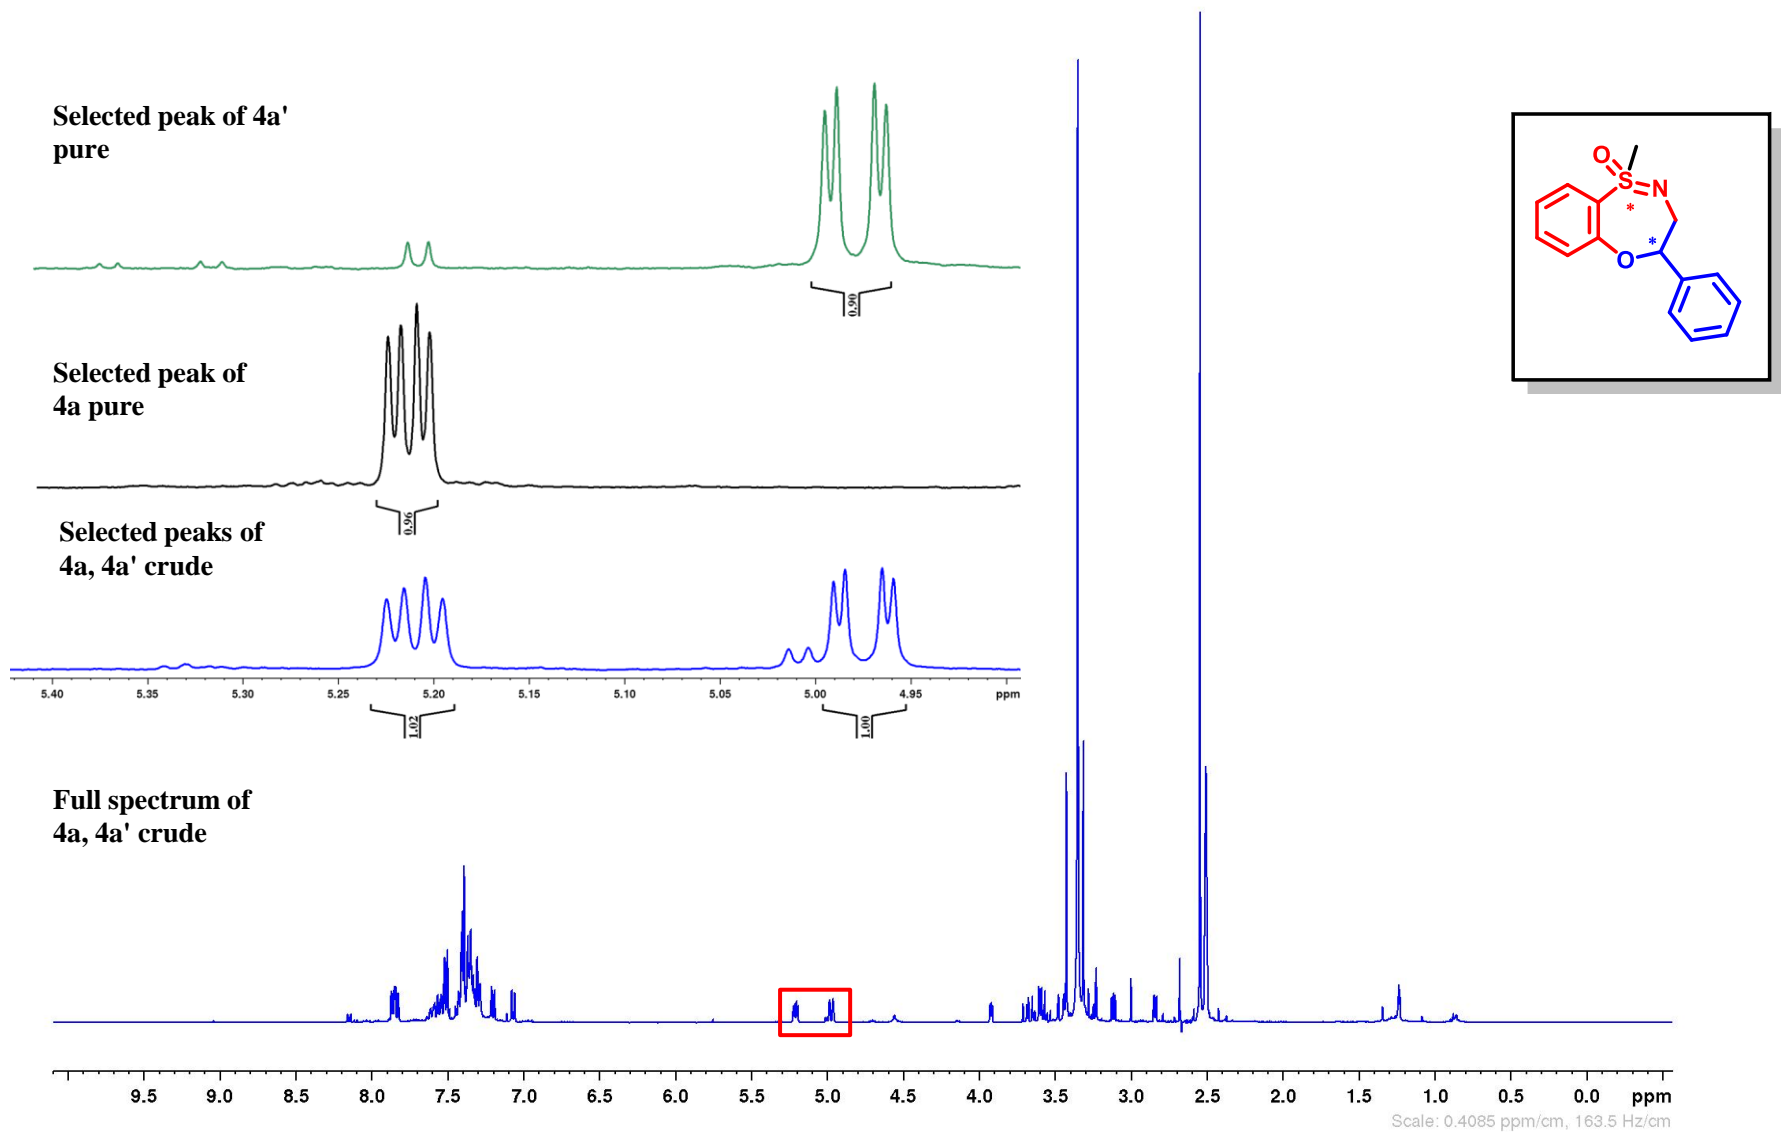

**Fig S-187:** Diastereomeric ratio calculation of Compound **4a** and **4a'** by <sup>1</sup>H NMR Spectra (400 MHz, CDCl<sub>3</sub>)



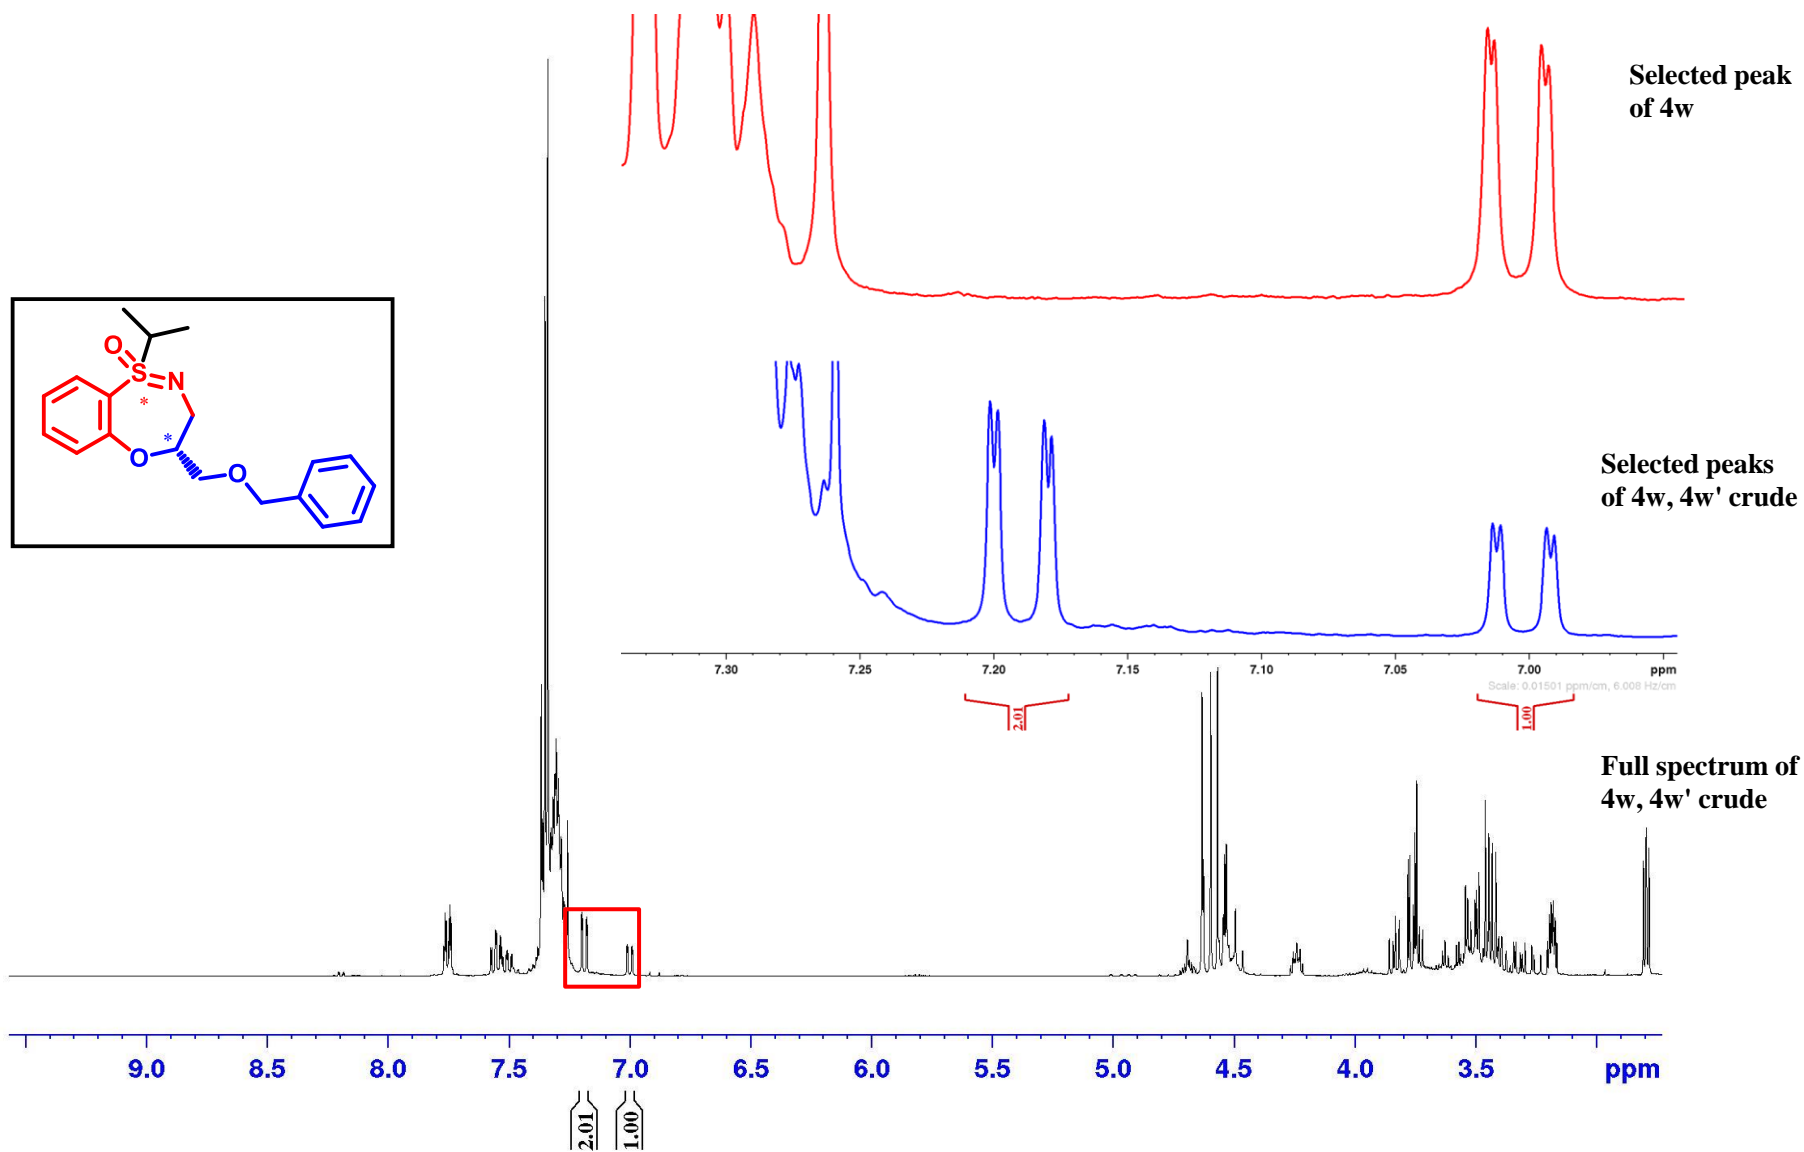

**Fig S-188: Diastereomeric ratio calculation of Compound 4w and 4w' by <sup>1</sup>H NMR Spectra (400 MHz, CDCl<sub>3</sub>)**

## SAMPLE INFORMATION

|                   |                           |                     |              |
|-------------------|---------------------------|---------------------|--------------|
| Sample Name:      | AB6-5%-IPA-1-CHI PAKIA    | Acquired By:        | System       |
| Sample Type:      | Unknown                   | Sample Set Name:    |              |
| Vial:             | 1                         | Acq. Method Set:    | ana_5_95     |
| Injection #:      | 1                         | Processing Method:  | AB6 230 NM   |
| Injection Volume: | 10.00 ul                  | Channel Name:       | 230.0nm      |
| Run Time:         | 120.0 Minutes             | Proc. Chnl. Descr.: | PDA 230.0 nm |
|                   |                           |                     |              |
| Date Acquired:    | 12/18/2021 9:08:56 PM IST |                     |              |
| Date Processed:   | 12/21/2021 6:10:06 PM IST |                     |              |

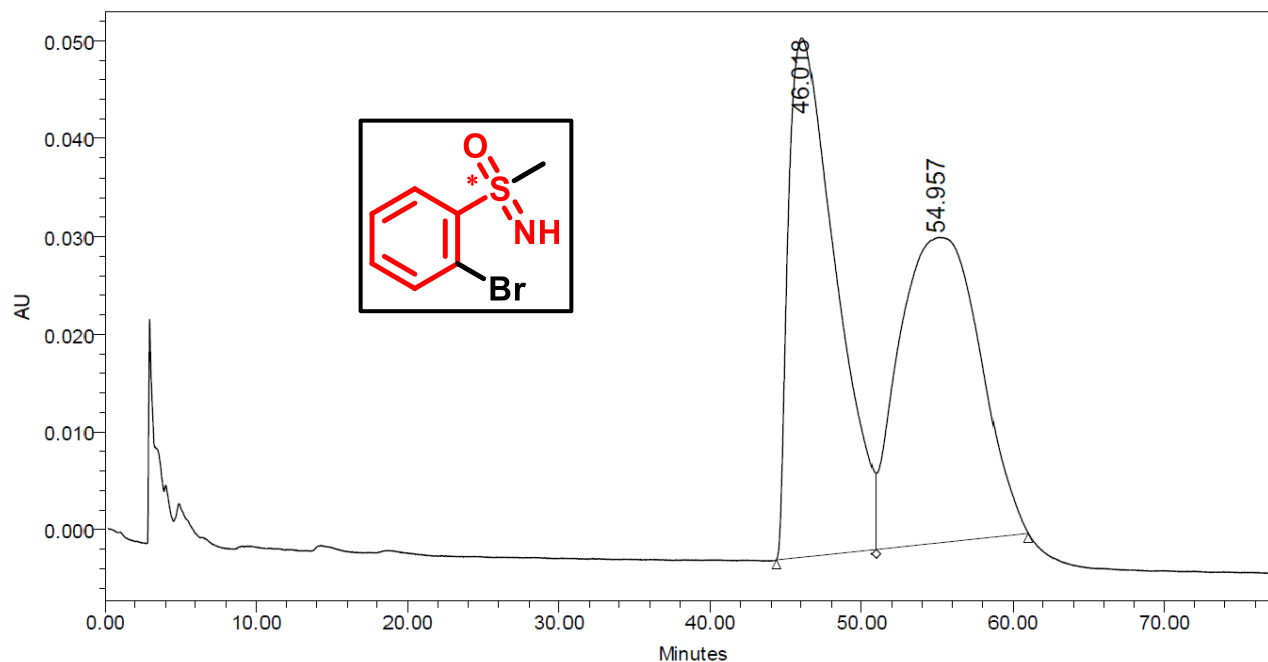

|   | RT     | Area     | % Area | Height |
|---|--------|----------|--------|--------|
| 1 | 46.018 | 11522945 | 49.63  | 53121  |
| 2 | 54.957 | 11694455 | 50.37  | 31312  |

**Fig S-189:** Purity data ( HPLC)of Compound **1a**

## SAMPLE INFORMATION

|                   |                           |                     |              |
|-------------------|---------------------------|---------------------|--------------|
| Sample Name:      | sp21-2-5%-IPA-1-CHIPAK IG | Acquired By:        | System       |
| Sample Type:      | Unknown                   | Sample Set Name:    |              |
| Vial:             | 1                         | Acq. Method Set:    | ana_5_95     |
| Injection #:      | 1                         | Processing Method:  | AB 21        |
| Injection Volume: | 10.00 ul                  | Channel Name:       | 230.0nm      |
| Run Time:         | 120.0 Minutes             | Proc. Chnl. Descr.: | PDA 230.0 nm |
|                   |                           |                     |              |
| Date Acquired:    | 3/27/2022 5:07:52 PM IST  |                     |              |
| Date Processed:   | 3/27/2022 5:43:40 PM IST  |                     |              |

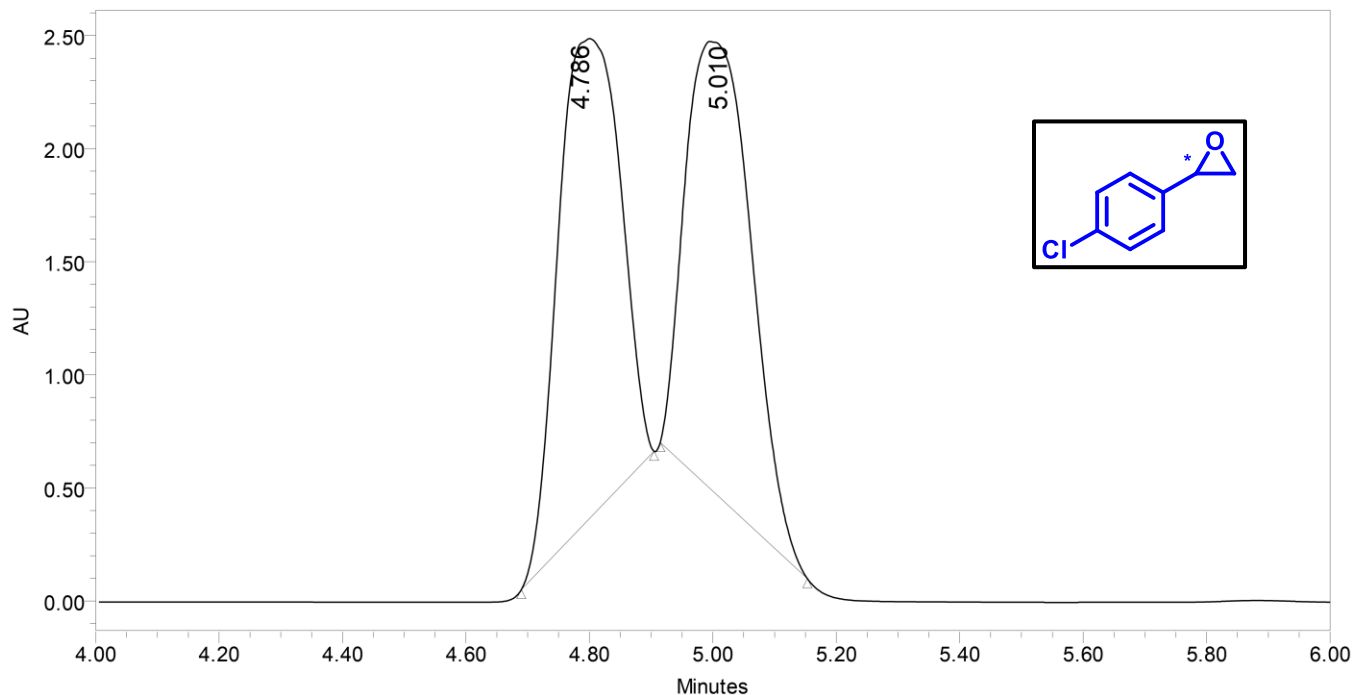

|   | RT    | Area     | % Area | Height  |
|---|-------|----------|--------|---------|
| 1 | 4.786 | 14994838 | 50.07  | 2140744 |
| 2 | 5.010 | 14954396 | 49.93  | 2000738 |

**Fig S-190: Purity data ( HPLC)of Compound 31**

## SAMPLE INFORMATION

|                   |                            |                     |              |
|-------------------|----------------------------|---------------------|--------------|
| Sample Name:      | AB 4P-1-20%IPA-1-CHIPAK IA | Acquired By:        | System       |
| Sample Type:      | Unknown                    | Sample Set Name:    |              |
| Vial:             | 1                          | Acq. Method Set:    | ana_20_80    |
| Injection #:      | 1                          | Processing Method:  | AB 4p 230 nm |
| Injection Volume: | 10.00 ul                   | Channel Name:       | 230.0nm      |
| Run Time:         | 500.0 Minutes              | Proc. Chnl. Descr.: | PDA 230.0 nm |
|                   |                            |                     |              |
| Date Acquired:    | 1/6/2022 9:22:37 PM IST    |                     |              |
| Date Processed:   | 1/6/2022 9:56:06 PM IST    |                     |              |

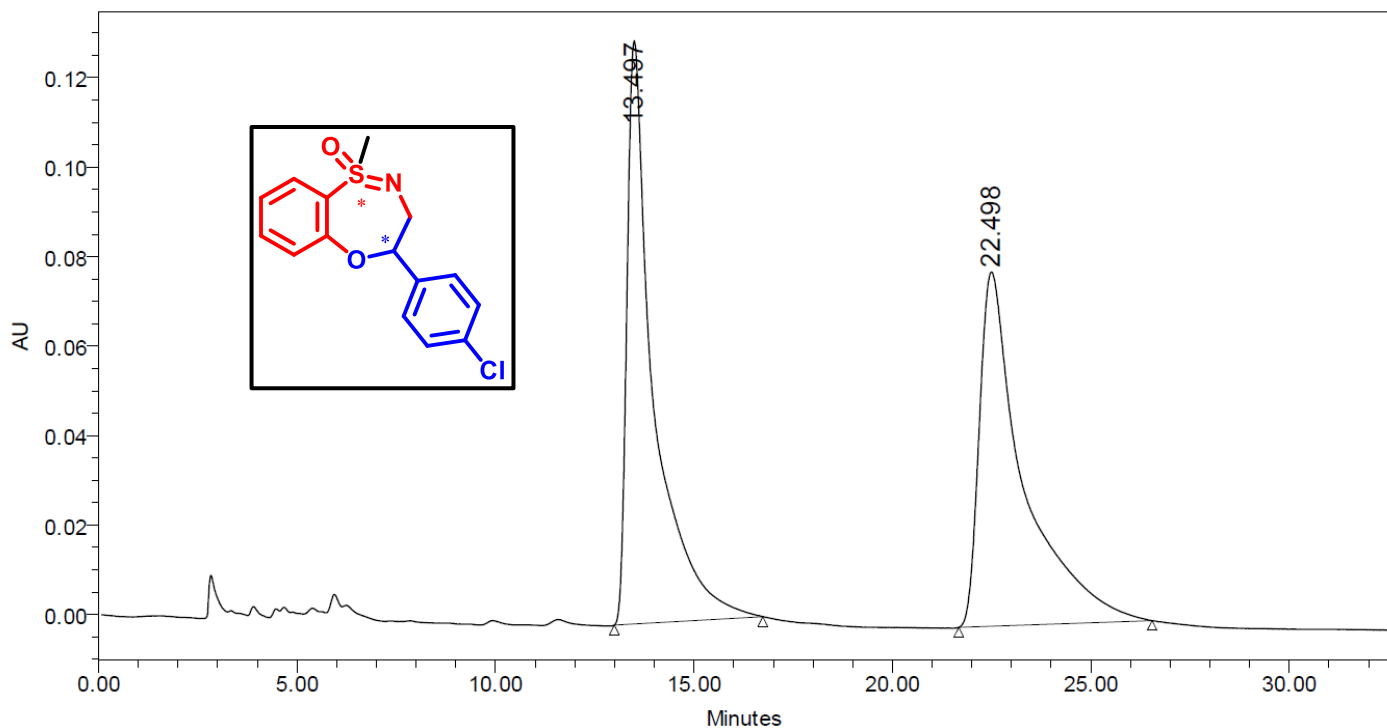

|   | RT     | Area    | % Area | Height |
|---|--------|---------|--------|--------|
| 1 | 13.497 | 6104783 | 50.00  | 130277 |
| 2 | 22.498 | 6105167 | 50.00  | 79120  |

**Fig S-191: Purity data ( HPLC)of Compound 4p**

## SAMPLE INFORMATION

|                   |                            |                     |              |
|-------------------|----------------------------|---------------------|--------------|
| Sample Name:      | AB 4q-1-30%IPA-1-CHIPAK IA | Acquired By:        | System       |
| Sample Type:      | Unknown                    | Sample Set Name:    |              |
| Vial:             | 1                          | Acq. Method Set:    | ana_30_70    |
| Injection #:      | 1                          | Processing Method:  | AB 4q 230 nm |
| Injection Volume: | 10.00 ul                   | Channel Name:       | 230.0nm      |
| Run Time:         | 500.0 Minutes              | Proc. Chnl. Descr.: | PDA 230.0 nm |
|                   |                            |                     |              |
| Date Acquired:    | 1/6/2022 10:13:08 PM IST   |                     |              |
| Date Processed:   | 1/6/2022 10:32:01 PM IST   |                     |              |

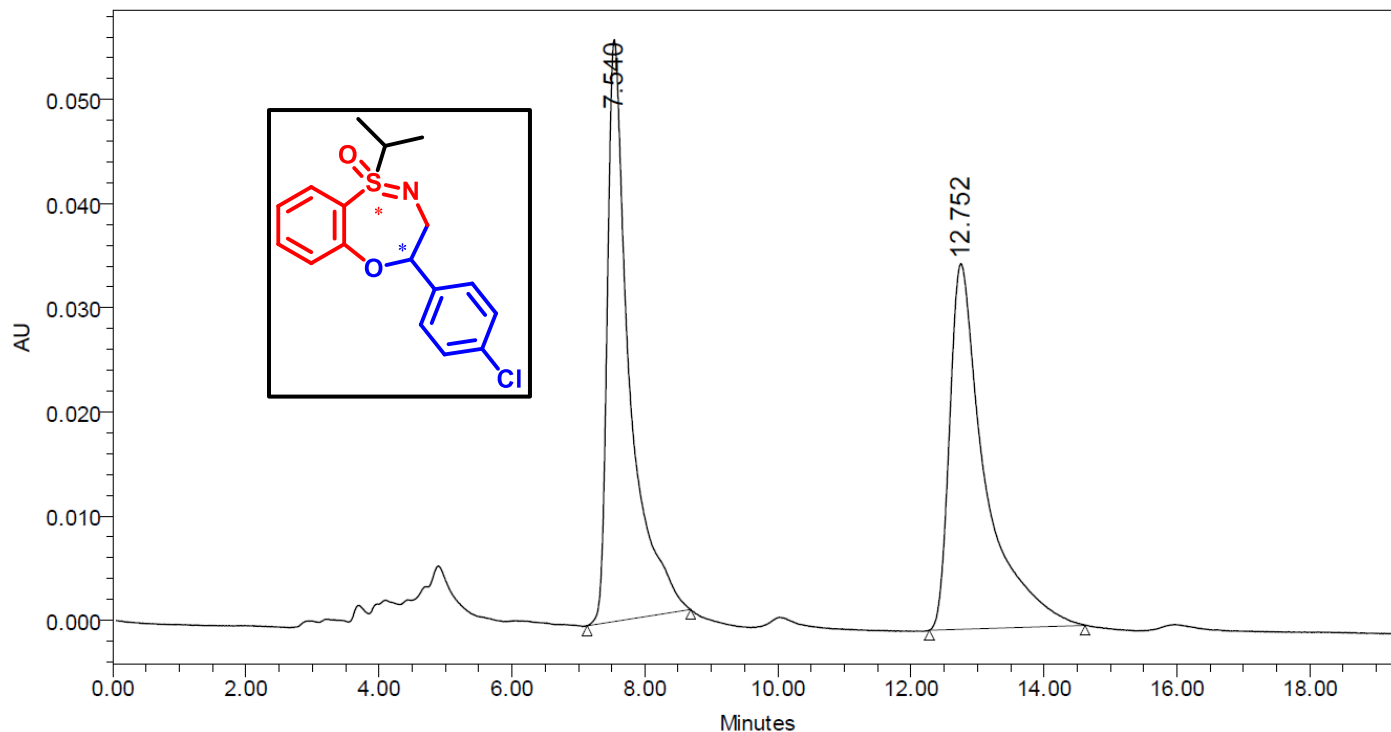

|   | RT     | Area    | % Area | Height |
|---|--------|---------|--------|--------|
| 1 | 7.540  | 1297109 | 50.00  | 55857  |
| 2 | 12.752 | 1297201 | 50.00  | 35090  |

**Fig S-192:** Purity data ( HPLC)of Compound **4q**

## SAMPLE INFORMATION

|                   |                           |                     |              |
|-------------------|---------------------------|---------------------|--------------|
| Sample Name:      | AB-3-1a-1-20%-1-CHICELOJH | Acquired By:        | System       |
| Sample Type:      | Unknown                   | Sample Set Name:    |              |
| Vial:             | 1                         | Acq. Method Set:    | ana_20_80    |
| Injection #:      | 1                         | Processing Method:  | AB 3 1a      |
| Injection Volume: | 10.00 ul                  | Channel Name:       | 210.0nm      |
| Run Time:         | 120.0 Minutes             | Proc. Chnl. Descr.: | PDA 210.0 nm |
|                   |                           |                     |              |
| Date Acquired:    | 5/11/2022 10:35:59 PM IST |                     |              |
| Date Processed:   | 5/11/2022 11:03:34 PM IST |                     |              |

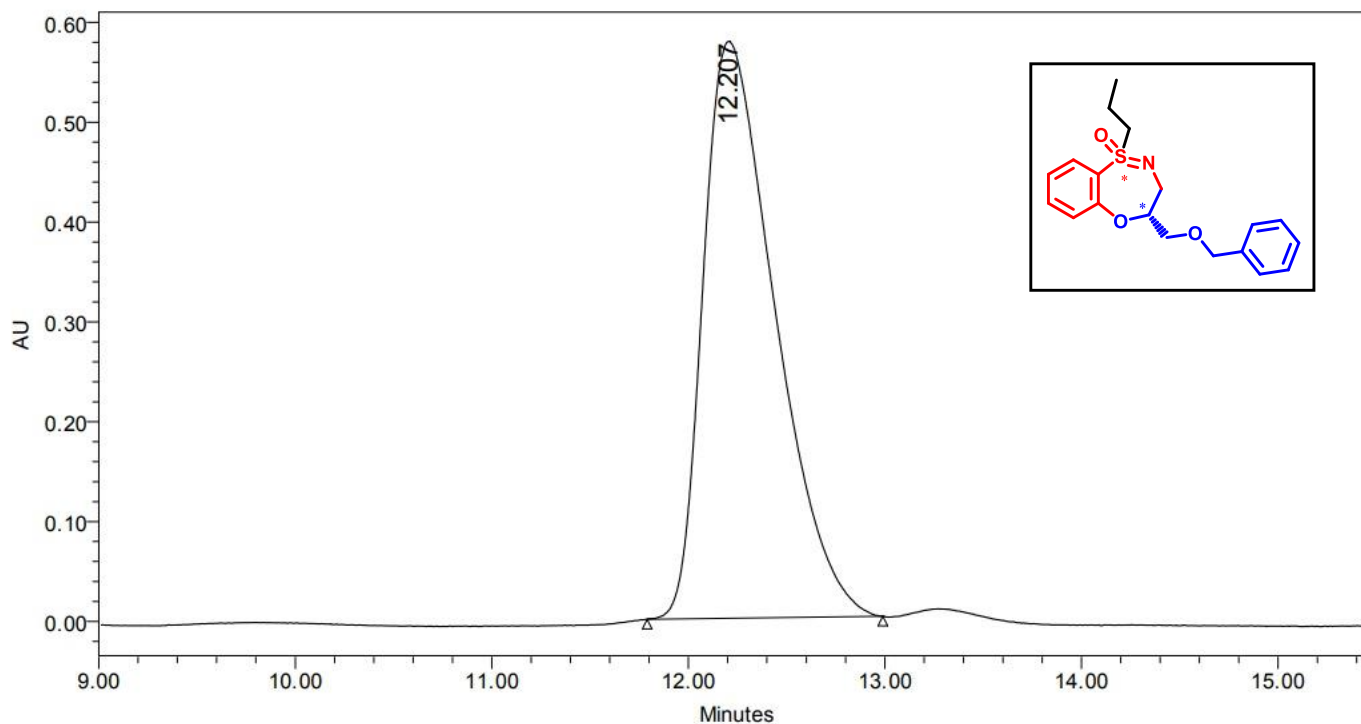

|   | RT     | Area     | % Area | Height |
|---|--------|----------|--------|--------|
| 1 | 12.207 | 14662005 | 100.00 | 577617 |

**Fig S-193:** Purity data ( HPLC)of Compound **4z**

## SAMPLE INFORMATION

|                   |                           |                     |              |
|-------------------|---------------------------|---------------------|--------------|
| Sample Name:      | AB-3-1b-1-20%-1-CHICELOJH | Acquired By:        | System       |
| Sample Type:      | Unknown                   | Sample Set Name:    |              |
| Vial:             | 1                         | Acq. Method Set:    | ana_20_80    |
| Injection #:      | 1                         | Processing Method:  | AB 3 1b      |
| Injection Volume: | 10.00 ul                  | Channel Name:       | 210.0nm      |
| Run Time:         | 120.0 Minutes             | Proc. Chnl. Descr.: | PDA 210.0 nm |
|                   |                           |                     |              |
| Date Acquired:    | 5/11/2022 11:07:38 PM IST |                     |              |
| Date Processed:   | 5/11/2022 11:27:48 PM IST |                     |              |

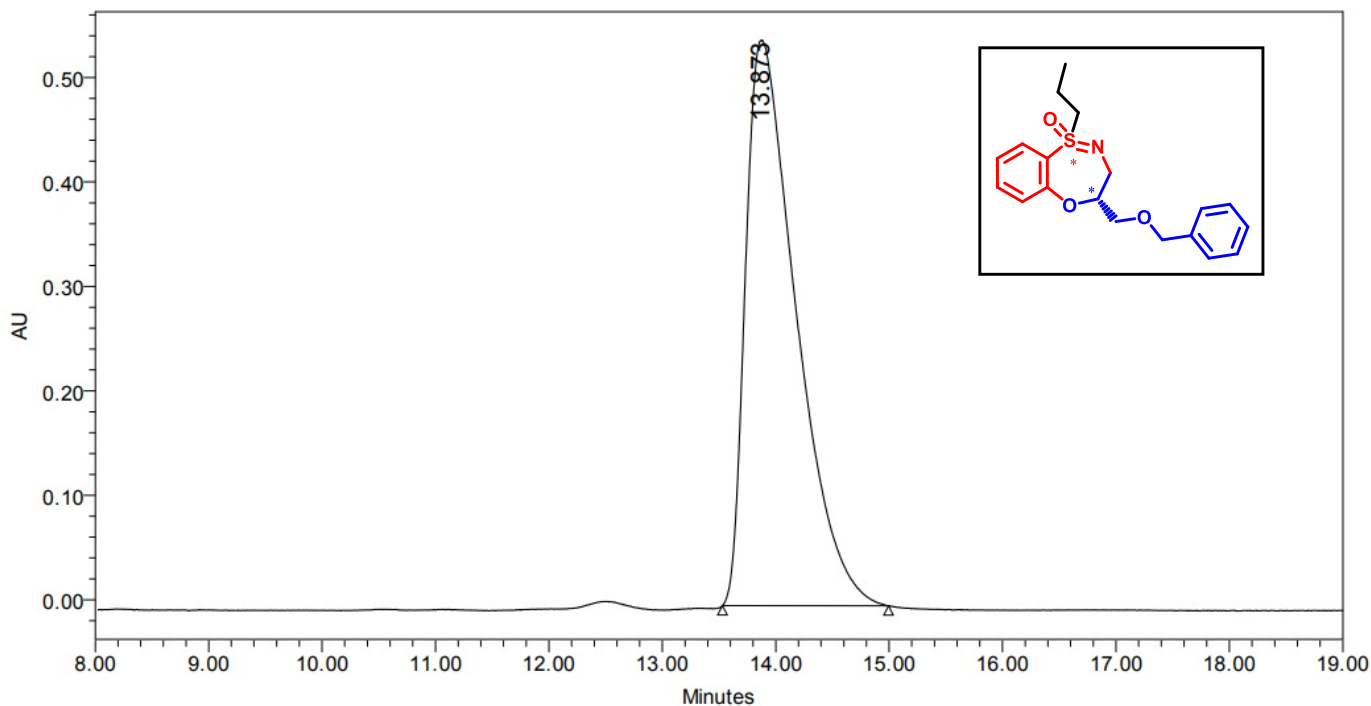

|   | RT     | Area     | % Area | Height |
|---|--------|----------|--------|--------|
| 1 | 13.873 | 16736013 | 100.00 | 541357 |

**Fig S-194:** Purity data ( HPLC)of Compound (R,S)-4z'
